# Supplementary material for: Theoretical OH stretching vibrations in dravite
Source: Copernicus journal article supplement (doi:10.5194/ejm-34-239-2022), 2022-04-13

**Electronic supplementary information to**  
**"Theoretical OH-stretching vibrations in dravite"**

Yves Fuchs, Chloé Fourdrin, Etienne Balan

**I- Lattice dynamic of OH stretching vibrations in molecular coordinates**

The lattice dynamic of molecular crystals has been reviewed by Califano et al. (1981) who provide a general treatment of the relations between the dynamical equations expressed in Cartesian coordinates and those expressed in molecular coordinates. In the present case, the system is described by a collection of OH stretching oscillators interacting with each other but decoupled from the other degrees of freedom. Following Califano et al. (1981), each isolated oscillator is characterized by its harmonic eigenfrequency  $\omega$  and normal stretching coordinate  $q^{m\mu}$ , where  $m$  and  $\mu$  are the index related to the cell and to the oscillator position in the cell, respectively. The total crystal potential  $V$  is a sum of intermolecular and intramolecular contributions. Considering pairwise harmonic interactions between oscillators at positions  $m\mu$  and  $nv$ , it has the form:

$$V = \frac{1}{2} \sum_{m,n} \sum_{\mu,\nu} \left[ F \begin{pmatrix} m & \mu \\ n & \nu \end{pmatrix} + \delta_{mn} \delta_{\mu\nu} \omega^2 \right] q^{m\mu} q^{nv} \quad \text{Eq. 1}$$

where the interaction coefficients  $F \begin{pmatrix} m & \mu \\ n & \nu \end{pmatrix} = \left[ \frac{\partial^2 V}{\partial q^{m\mu} \partial q^{nv}} \right]_0$  are computed at equilibrium positions and are only defined for  $\mu \neq \nu$  if  $m=n$ . They are real quantities whose magnitude decreases as a function of the distance separating the oscillators. Imposing periodic boundary conditions to a macroscopic parallelepiped comprising  $N$  crystal cells, the symmetrized normal coordinates of the isolated oscillator  $\mu$  are constructed as:

$$q^\mu(\mathbf{k}) = N^{-\frac{1}{2}} \sum_m q^{m\mu} e^{-i\mathbf{k}\mathbf{R}_m} \quad \text{Eq. 2}$$

where the vector  $\mathbf{R}_m$  corresponds to the lattice position of the  $m^{\text{th}}$  cell and  $\mathbf{k}$  is the phonon wavevector specifying an irreducible representation of the translational group. For each  $\mathbf{k}$  vector, the eigenvalue equations describing the interacting oscillators are then:

$$\sum_{\nu} D \begin{pmatrix} \mu \\ \nu \end{pmatrix} | \mathbf{k} \rangle e(\nu | p \mathbf{k}) = \omega_{p\mathbf{k}}^2 e(\mu | p \mathbf{k}) \quad \text{Eq. 3}$$

where  $p$  is the phonon branch,  $\omega_{p\mathbf{k}}^2$  the eigenfrequency and  $e(\mu | p \mathbf{k})$  the  $\mu^{\text{th}}$  coordinate of the corresponding normalised eigenvector. In Eq. 3, the dynamical matrix coefficients  $D \begin{pmatrix} \mu \\ \nu \end{pmatrix} | \mathbf{k} \rangle$  are defined by:

$$D \begin{pmatrix} \mu \\ \nu \end{pmatrix} | \mathbf{k} \rangle = \sum_n \left[ F \begin{pmatrix} 0 & \mu \\ n & \nu \end{pmatrix} + \delta_{0n} \delta_{\mu\nu} \omega^2 \right] e^{i\mathbf{k}\mathbf{R}_n} \quad \text{Eq. 4}$$

For  $\mathbf{k}=0$  (i.e., at the center of the Brillouin zone), the dynamical matrix defined by Eq. 4 is symmetric, with diagonal coefficients equal to  $\omega^2$  and out-of-diagonal coefficients determined by the bilinear couplings between different oscillators. In the present case, the primitive cell contains three  $^{\text{V}}(\text{OH})$  oscillators related to each other by 3m symmetry. The 6 out-of-diagonal coefficients of the 3x3 dynamical matrix have the same value, here noted  $f$ . Its diagonalization results in one and two degenerate transverse optical modes belonging to the  $A_1$  and  $E$  representations, respectively. At the first order in  $f/\omega^2$ , the splitting of the  $A_1$  and  $E$  modes is  $3\lambda$ , with  $\lambda=f/2\omega$ , thus providing a measure of the pairwise interactions between the oscillators. If the dominant interactions occur within the primitive cell (containing a single 3(YZZ) cluster), the description is formally equivalent to that of the potential coupling of three equivalent X-H groups in a  $C_{3v}$  molecule, where X is a heavier atom (e.g., Halonen and Child, 1983).

## References

- Califano, S., Schettino, V., and Neto, N.: Lattice Dynamics of Molecular Crystals, Lecture Note in Chemistry, Springer, Berlin, ISBN: 978-3-540-10868-9, 1981.
- Halonen, L. and Child, M. S.: Local mode theory for  $C_{3v}$  molecules:  $\text{CH}_3\text{D}$ ,  $\text{CHD}_3$ ,  $\text{SiH}_3\text{D}$ , and  $\text{SiHD}_3$ , J. Chem. Phys., 79, 4355, <https://doi.org/10.1063/1.446317>, 1983.

## II- Supplementary tables and figures

**Table S1:** Theoretical OH stretching frequencies ( $\omega_{\text{OH}}$ ,  $\text{cm}^{-1}$ ) of dravite obtained using the full dynamical matrix (DM) of the rhomboedral primitive cell and using a partial DM of the rhomboedral primitive cell restricted to the atomic displacements of the 4 OH groups.

| mode                    | $\omega_{\text{OH}}$<br>full DM | $\omega_{\text{OH}}$<br>partial DM | difference<br>( $\text{cm}^{-1}$ ) |
|-------------------------|---------------------------------|------------------------------------|------------------------------------|
| $\nu_{\text{(OH)}} A_1$ | 3653.528                        | 3653.429                           | - 0.099                            |
| $\nu_{\text{(OH)}} E$   | 3653.634                        | 3653.515                           | - 0.119                            |
| $\omega_{\text{(OH)}}$  | 3856.001                        | 3855.979                           | - 0.022                            |

**Table S2:** Theoretical OH stretching frequencies ( $\omega_{\text{OH}}$ ,  $\text{cm}^{-1}$ ) of the hexagonal dravite cell obtained using the full dynamical matrix (DM), a partial DM restricted to atomic displacements of OH groups and a smaller partial DM restricted to the OH groups belonging to a single 3(YZZ) cluster.

| mode                    | $\omega_{\text{OH}}$<br>full DM | $\omega_{\text{OH}}$<br>partial DM | difference<br>( $\text{cm}^{-1}$ ) | mode                    | $\omega_{\text{OH}}$<br>average* | $\omega_{\text{OH}}$<br>single cluster | difference<br>( $\text{cm}^{-1}$ ) |
|-------------------------|---------------------------------|------------------------------------|------------------------------------|-------------------------|----------------------------------|----------------------------------------|------------------------------------|
| $\nu_{\text{(OH)}} A_1$ | 3652.045                        | 3651.946                           | -0.099                             | $\nu_{\text{(OH)}} A_1$ | 3652.41                          | 3652.28                                | -0.13                              |
| $\nu_{\text{(OH)}} A_1$ | 3652.580                        | 3652.462                           | -0.118                             | $\nu_{\text{(OH)}} E$   | 3653.04                          | 3653.24                                | 0.20                               |
| $\nu_{\text{(OH)}} A_1$ | 3652.595                        | 3652.477                           | -0.118                             | $\omega_{\text{(OH)}}$  | 3856.31                          | 3856.23                                | -0.08                              |
| $\nu_{\text{(OH)}} E$   | 3652.736                        | 3652.627                           | -0.109                             |                         |                                  |                                        |                                    |
| $\nu_{\text{(OH)}} E$   | 3652.998                        | 3652.888                           | -0.110                             |                         |                                  |                                        |                                    |
| $\nu_{\text{(OH)}} E$   | 3653.377                        | 3653.263                           | -0.114                             |                         |                                  |                                        |                                    |
| $\omega_{\text{(OH)}}$  | 3856.290                        | 3856.266                           | -0.024                             |                         |                                  |                                        |                                    |
| $\omega_{\text{(OH)}}$  | 3856.303                        | 3856.280                           | -0.023                             |                         |                                  |                                        |                                    |
| $\omega_{\text{(OH)}}$  | 3856.329                        | 3856.305                           | -0.024                             |                         |                                  |                                        |                                    |

\* average frequencies of full DM modes with corresponding symmetry.

**Table S3:** Theoretical relative energy, OH stretching frequency ( $\omega_{\text{OH}}$ ) and O-H bond length ( $d(\text{OH})$ ) of dravite hexagonal cells displaying Al-Mg inversion. Data for ideal dravite are also reported for comparison. The Y sites occupied by a Al and Z sites occupied by Mg are specified with the labels indicated on Fig. S1. N is the number of symmetrically equivalent configurations. The relative energy of the models is defined with respect to ideal dravite.

| model   | <sup>Y</sup> Al | <sup>Z</sup> Mg | N | rel. energy<br>(kJ/mol) | OH<br>label | $\omega_{\text{OH}}$<br>(cm <sup>-1</sup> ) | $d(\text{OH})$<br>(Å) | OH label   | $\omega_{\text{OH}}$<br>(cm <sup>-1</sup> ) | $d(\text{OH})$<br>(Å) |
|---------|-----------------|-----------------|---|-------------------------|-------------|---------------------------------------------|-----------------------|------------|---------------------------------------------|-----------------------|
| dravite | -               | -               | 1 | 0                       | W           | 3856                                        | 0.9589                | V1, V2, V3 | 3653                                        | 0.9724                |
| Mg_Al   | a               | 1               | 6 | 13.4                    | W           | 3811                                        | 0.9615                | V3         | 3656                                        | 0.9721                |
|         |                 |                 |   |                         |             |                                             |                       | V2         | 3653                                        | 0.9723                |
|         |                 |                 |   |                         |             |                                             |                       | V1         | 3599                                        | 0.9749                |
| Mg_Al_2 | a               | 2               | 6 | 40.5                    | W           | 3780                                        | 0.9630                | V2         | 3683                                        | 0.9700                |
|         |                 |                 |   |                         |             |                                             |                       | V3         | 3655                                        | 0.9722                |
|         |                 |                 |   |                         |             |                                             |                       | V1         | 3583                                        | 0.9765                |
| Mg_Al_3 | a               | 3               | 6 | 48.9                    | W           | 3811                                        | 0.9615                | V2         | 3679                                        | 0.9702                |
|         |                 |                 |   |                         |             |                                             |                       | V3         | 3651                                        | 0.9724                |
|         |                 |                 |   |                         |             |                                             |                       | V1         | 3591                                        | 0.9761                |
| 2_1     | a, b            | 1, 2            | 3 | 58.1                    | W           | 3757                                        | 0.9647                | V3         | 3656                                        | 0.9721                |
|         |                 |                 |   |                         |             |                                             |                       | V1, V2     | 3588                                        | 0.9755                |
| 2_2     | a, b            | 1, 3            | 6 | 54.5                    | W           | 3775                                        | 0.9639                | V3         | 3653                                        | 0.9723                |
|         |                 |                 |   |                         |             |                                             |                       | V1         | 3592                                        | 0.9752                |
|         |                 |                 |   |                         |             |                                             |                       | V2         | 3583                                        | 0.9757                |
| 2_3     | a, b            | 1, 4            | 6 | 87.8                    | W           | 3780                                        | 0.9637                | V3         | 3682                                        | 0.9700                |
|         |                 |                 |   |                         |             |                                             |                       | V1         | 3594                                        | 0.9752                |
|         |                 |                 |   |                         |             |                                             |                       | V2         | 3570                                        | 0.9772                |
| 2_4     | a, b            | 1, 5            | 6 | 87.0                    | W           | 3779                                        | 0.9637                | V3         | 3681                                        | 0.9700                |
|         |                 |                 |   |                         |             |                                             |                       | V1         | 3588                                        | 0.9755                |
|         |                 |                 |   |                         |             |                                             |                       | V2         | 3579                                        | 0.9768                |
| 2_5     | a, b            | 1, 6            | 6 | 74.8                    | W           | 3771                                        | 0.9640                | V3         | 3653                                        | 0.9723                |
|         |                 |                 |   |                         |             |                                             |                       | V1         | 3612                                        | 0.9730                |
|         |                 |                 |   |                         |             |                                             |                       | V2         | 3580                                        | 0.9767                |
| 2_6     | a, b            | 3, 6            | 3 | 58.9                    | W           | 3787                                        | 0.9632                | V3         | 3648                                        | 0.9725                |
|         |                 |                 |   |                         |             |                                             |                       | V1, V2     | 3590                                        | 0.9754                |
| 2_7     | a, b            | 4, 5            | 3 | 152.4                   | W           | 3775                                        | 0.9638                | V3         | 3716                                        | 0.9672                |
|         |                 |                 |   |                         |             |                                             |                       | V1, V2     | 3578                                        | 0.9768                |
| 2_8     | a, b            | 5, 6            | 6 | 98.1                    | W           | 3797                                        | 0.9628                | V3         | 3678                                        | 0.9702                |
|         |                 |                 |   |                         |             |                                             |                       | V2         | 3585                                        | 0.9765                |
|         |                 |                 |   |                         |             |                                             |                       | V1         | 3580                                        | 0.9759                |
| 2_9     | a, b            | 3, 5            | 6 | 89.2                    | W           | 3794                                        | 0.9629                | V3         | 3678                                        | 0.9702                |
|         |                 |                 |   |                         |             |                                             |                       | V2         | 3587                                        | 0.9755                |
|         |                 |                 |   |                         |             |                                             |                       | V1         | 3577                                        | 0.9768                |
| 3_1     | a, b, c         | 1, 2, 3         | 6 | 142.8                   | W           | 3768                                        | 0.9647                | V2         | 3601                                        | 0.9735                |
|         |                 |                 |   |                         |             |                                             |                       | V1         | 3574                                        | 0.9761                |
|         |                 |                 |   |                         |             |                                             |                       | V3         | 3567                                        | 0.9773                |
| 3_2     | a, b, c         | 1, 2, 4         | 6 | 125.8                   | W           | 3766                                        | 0.9648                | V3         | 3583                                        | 0.9757                |
|         |                 |                 |   |                         |             |                                             |                       | V1         | 3578                                        | 0.9760                |
|         |                 |                 |   |                         |             |                                             |                       | V2         | 3570                                        | 0.9764                |
| 3_3     | a, b, c         | 1, 3, 5         | 2 | 116.2                   | W           | 3767                                        | 0.9648                | V1, V2, V3 | 3576                                        | 0.9760                |

**Fig. S1:** Dravite cluster viewed along the [001] direction. a,b, and c: Y sites, 1-6: Z sites,  $V_1$ ,  $V_2$ ,  $V_3$ : V sites occupied by OH group. Purple grey triangles:  $BO_3$  groups. White spheres: H atoms. Red spheres: oxygen atoms.

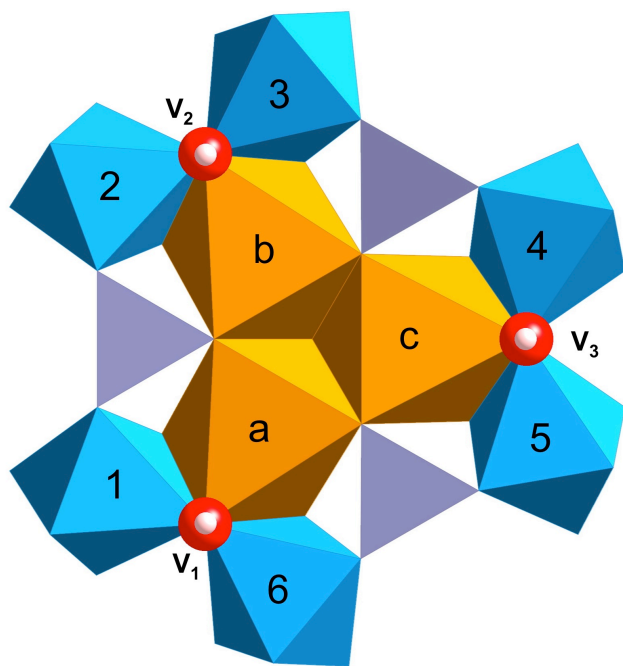

**Fig. S2:** Relation between theoretical OH stretching frequency ( $\omega_{\text{OH}}$ , Table S1) and OH bond length ( $d(\text{OH})$ , Table S1) for models of dravite displaying Al-Mg inversion.

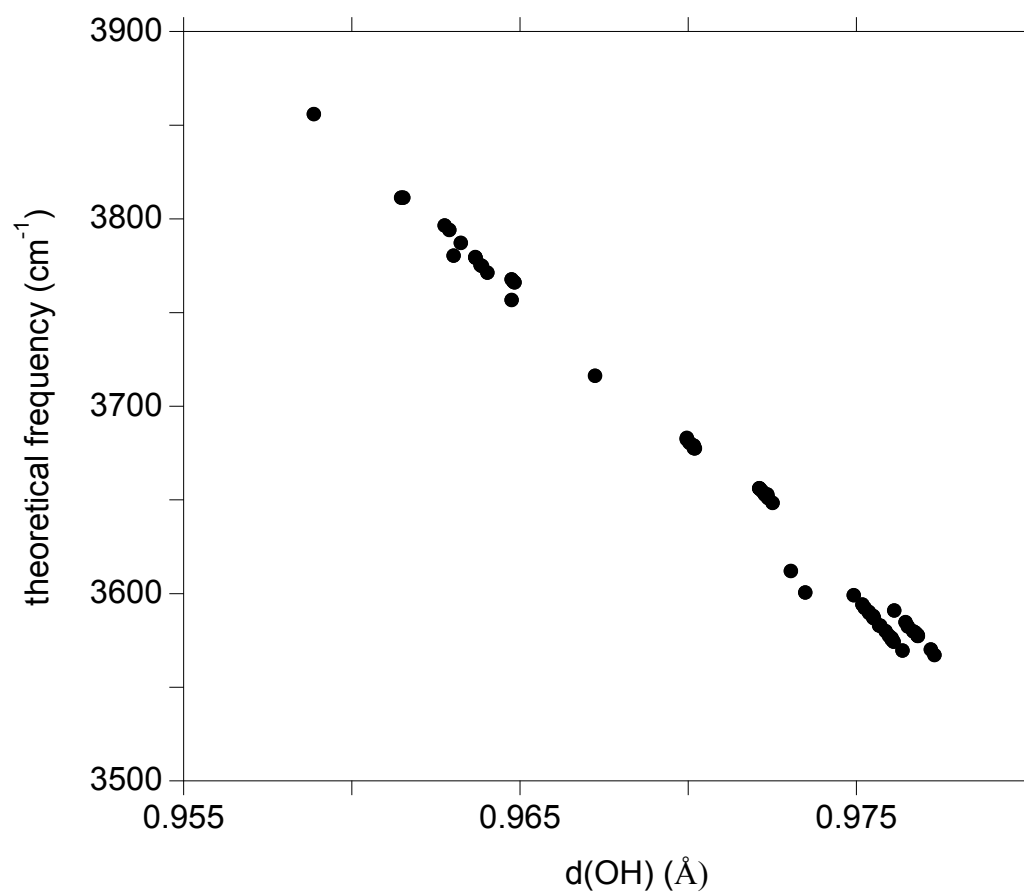

Supplement: Supplementary file 1 [file ejm-34-239-2022-supplement.zip]
