# Supplementary material for: Theoretical OH stretching vibrations in dravite
Source: Copernicus journal article supplement (doi:10.5194/ejm-34-239-2022), 2022-04-13
Supplement: Supplementary file 2 [file ejm-34-239-2022-supplement.zip]

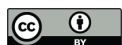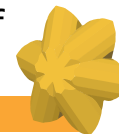

## *Supplement of*

# **Theoretical OH stretching vibrations in dravite**

**Yves Fuchs et al.**

*Correspondence to:* Etienne Balan ([etienne.balan@sorbonne-universite.fr](mailto:etienne.balan@sorbonne-universite.fr))

- [ejm-34-239-2022-supplement-title-page.pdf](#)
- [ejm-2021-65-supplement-version2](#)
  - [supplementary\\_files](#)
    - \* [.DS\\_Store](#)
    - \* [Electronic supplementary information.pdf](#)
    - \* [Structure\\_and\\_eigendisplacement\\_files](#)

The copyright of individual parts of the supplement might differ from the article licence.
