# Supplementary material for: Theoretical OH stretching vibrations in dravite
Source: Copernicus journal article supplement (doi:10.5194/ejm-34-239-2022), 2022-04-13
Supplement: Supplementary file 3 [file ejm-34-239-2022-supplement.zip]

Archive with 84 entries (77 files):
- ejm-2021-65-supplement-version2/
- ejm-2021-65-supplement-version2/supplementary_files/
- ejm-2021-65-supplement-version2/supplementary_files/.DS_Store
- ejm-2021-65-supplement-version2/supplementary_files/Structure_and_eigendisplacement_files/
- ejm-2021-65-supplement-version2/supplementary_files/Structure_and_eigendisplacement_files/.DS_Store
- ejm-2021-65-supplement-version2/supplementary_files/Structure_and_eigendisplacement_files/chemically_disordered_models_simple_hexagonal_cell/
- ejm-2021-65-supplement-version2/supplementary_files/Structure_and_eigendisplacement_files/chemically_disordered_models_simple_hexagonal_cell/.DS_Store
- ejm-2021-65-supplement-version2/supplementary_files/Structure_and_eigendisplacement_files/chemically_disordered_models_simple_hexagonal_cell/dravite_Mg.cif
- ejm-2021-65-supplement-version2/supplementary_files/Structure_and_eigendisplacement_files/chemically_disordered_models_simple_hexagonal_cell/dravite_Mg.txt
- ejm-2021-65-supplement-version2/supplementary_files/Structure_and_eigendisplacement_files/chemically_disordered_models_simple_hexagonal_cell/dravite_Al_vacancy.cif
- ejm-2021-65-supplement-version2/supplementary_files/Structure_and_eigendisplacement_files/chemically_disordered_models_simple_hexagonal_cell/dravite_Al_Mg.cif
- ejm-2021-65-supplement-version2/supplementary_files/Structure_and_eigendisplacement_files/chemically_disordered_models_simple_hexagonal_cell/dravite_2Al_vacancy.txt
- ejm-2021-65-supplement-version2/supplementary_files/Structure_and_eigendisplacement_files/chemically_disordered_models_simple_hexagonal_cell/read_me.txt
- ejm-2021-65-supplement-version2/supplementary_files/Structure_and_eigendisplacement_files/chemically_disordered_models_simple_hexagonal_cell/dravite_Al_Mg.txt
- ejm-2021-65-supplement-version2/supplementary_files/Structure_and_eigendisplacement_files/chemically_disordered_models_simple_hexagonal_cell/dravite_vacancy.txt
- ejm-2021-65-supplement-version2/supplementary_files/Structure_and_eigendisplacement_files/chemically_disordered_models_simple_hexagonal_cell/dravite_Al.cif
- ejm-2021-65-supplement-version2/supplementary_files/Structure_and_eigendisplacement_files/chemically_disordered_models_simple_hexagonal_cell/dravite_Mg_Al_vacancy.txt
- ejm-2021-65-supplement-version2/supplementary_files/Structure_and_eigendisplacement_files/chemically_disordered_models_simple_hexagonal_cell/dravite_2Al_vacancy.cif
- ejm-2021-65-supplement-version2/supplementary_files/Structure_and_eigendisplacement_files/chemically_disordered_models_simple_hexagonal_cell/dravite_Mg_Al_vacancy.cif
- ejm-2021-65-supplement-version2/supplementary_files/Structure_and_eigendisplacement_files/chemically_disordered_models_simple_hexagonal_cell/dravite_Al_vacancy.txt
- ejm-2021-65-supplement-version2/supplementary_files/Structure_and_eigendisplacement_files/chemically_disordered_models_simple_hexagonal_cell/dravite_vacancy.cif
- ejm-2021-65-supplement-version2/supplementary_files/Structure_and_eigendisplacement_files/chemically_disordered_models_simple_hexagonal_cell/dravite_Al.txt
- ejm-2021-65-supplement-version2/supplementary_files/Structure_and_eigendisplacement_files/ideal_dravite/
- ejm-2021-65-supplement-version2/supplementary_files/Structure_and_eigendisplacement_files/ideal_dravite/.DS_Store
- ejm-2021-65-supplement-version2/supplementary_files/Structure_and_eigendisplacement_files/ideal_dravite/dravite_P1_hexagonal.cif
- ejm-2021-65-supplement-version2/supplementary_files/Structure_and_eigendisplacement_files/ideal_dravite/dravite_OH_eigendisplacements_rhomboedral_cell.txt
- ejm-2021-65-supplement-version2/supplementary_files/Structure_and_eigendisplacement_files/ideal_dravite/dravite_OH_eigendisplacements_hexagonal_cell.txt
- ejm-2021-65-supplement-version2/supplementary_files/Structure_and_eigendisplacement_files/ideal_dravite/dravite_P1_rhombohedral.cif
- ejm-2021-65-supplement-version2/supplementary_files/Structure_and_eigendisplacement_files/chemically_disordered_models_1x1x2_hexagonal_supercell/
- ejm-2021-65-supplement-version2/supplementary_files/Structure_and_eigendisplacement_files/chemically_disordered_models_1x1x2_hexagonal_supercell/.DS_Store
- ejm-2021-65-supplement-version2/supplementary_files/Structure_and_eigendisplacement_files/chemically_disordered_models_1x1x2_hexagonal_supercell/dravite_112_Al_vacancy_conf2.cif
- ejm-2021-65-supplement-version2/supplementary_files/Structure_and_eigendisplacement_files/chemically_disordered_models_1x1x2_hexagonal_supercell/dravite_112_Al_vacancy_conf1.cif
- ejm-2021-65-supplement-version2/supplementary_files/Structure_and_eigendisplacement_files/chemically_disordered_models_1x1x2_hexagonal_supercell/dravite_112_2Al_vacancy_conf2.txt
- ejm-2021-65-supplement-version2/supplementary_files/Structure_and_eigendisplacement_files/chemically_disordered_models_1x1x2_hexagonal_supercell/dravite_112_Al_vacancy_conf2.txt
- ejm-2021-65-supplement-version2/supplementary_files/Structure_and_eigendisplacement_files/chemically_disordered_models_1x1x2_hexagonal_supercell/dravite_112_Al.cif
- ejm-2021-65-supplement-version2/supplementary_files/Structure_and_eigendisplacement_files/chemically_disordered_models_1x1x2_hexagonal_supercell/dravite_112_Al_Mg_vacancy_conf2.txt
- ejm-2021-65-supplement-version2/supplementary_files/Structure_and_eigendisplacement_files/chemically_disordered_models_1x1x2_hexagonal_supercell/dravite_112_Al_Mg_vacancy_conf1.txt
- ejm-2021-65-supplement-version2/supplementary_files/Structure_and_eigendisplacement_files/chemically_disordered_models_1x1x2_hexagonal_supercell/read_me.txt
- ejm-2021-65-supplement-version2/supplementary_files/Structure_and_eigendisplacement_files/chemically_disordered_models_1x1x2_hexagonal_supercell/dravite_112_2Al_vacancy_conf1.txt
- ejm-2021-65-supplement-version2/supplementary_files/Structure_and_eigendisplacement_files/chemically_disordered_models_1x1x2_hexagonal_supercell/dravite_112_Al_Mg.txt
- ejm-2021-65-supplement-version2/supplementary_files/Structure_and_eigendisplacement_files/chemically_disordered_models_1x1x2_hexagonal_supercell/dravite_112_Mg.txt
- ejm-2021-65-supplement-version2/supplementary_files/Structure_and_eigendisplacement_files/chemically_disordered_models_1x1x2_hexagonal_supercell/dravite_112_Al_Mg_vacancy_conf2.cif
- ejm-2021-65-supplement-version2/supplementary_files/Structure_and_eigendisplacement_files/chemically_disordered_models_1x1x2_hexagonal_supercell/dravite_112_Al_vacancy_conf1.txt
- ejm-2021-65-supplement-version2/supplementary_files/Structure_and_eigendisplacement_files/chemically_disordered_models_1x1x2_hexagonal_supercell/dravite_112_Al_Mg_vacancy_conf1.cif
- ejm-2021-65-supplement-version2/supplementary_files/Structure_and_eigendisplacement_files/chemically_disordered_models_1x1x2_hexagonal_supercell/dravite_112_Mg.cif
- ejm-2021-65-supplement-version2/supplementary_files/Structure_and_eigendisplacement_files/chemically_disordered_models_1x1x2_hexagonal_supercell/dravite_112_2Al_vacancy_conf1.cif
- ejm-2021-65-supplement-version2/supplementary_files/Structure_and_eigendisplacement_files/chemically_disordered_models_1x1x2_hexagonal_supercell/dravite_112_vacancy.cif
- ejm-2021-65-supplement-version2/supplementary_files/Structure_and_eigendisplacement_files/chemically_disordered_models_1x1x2_hexagonal_supercell/dravite_112_vacancy.txt
- ejm-2021-65-supplement-version2/supplementary_files/Structure_and_eigendisplacement_files/chemically_disordered_models_1x1x2_hexagonal_supercell/dravite_112_Al.txt
- ejm-2021-65-supplement-version2/supplementary_files/Structure_and_eigendisplacement_files/chemically_disordered_models_1x1x2_hexagonal_supercell/dravite_112_Al_Mg.cif
- ejm-2021-65-supplement-version2/supplementary_files/Structure_and_eigendisplacement_files/chemically_disordered_models_1x1x2_hexagonal_supercell/dravite_112_2Al_vacancy_conf2.cif
- ejm-2021-65-supplement-version2/supplementary_files/Structure_and_eigendisplacement_files/dravite_models_with_YZ_inversion/
- ejm-2021-65-supplement-version2/supplementary_files/Structure_and_eigendisplacement_files/dravite_models_with_YZ_inversion/.DS_Store
- ejm-2021-65-supplement-version2/supplementary_files/Structure_and_eigendisplacement_files/dravite_models_with_YZ_inversion/dravite_inver_2_1_PBE.cif
- ejm-2021-65-supplement-version2/supplementary_files/Structure_and_eigendisplacement_files/dravite_models_with_YZ_inversion/dravite_inver_2_5.txt
- ejm-2021-65-supplement-version2/supplementary_files/Structure_and_eigendisplacement_files/dravite_models_with_YZ_inversion/dravite_Mg_Al_2.txt
- ejm-2021-65-supplement-version2/supplementary_files/Structure_and_eigendisplacement_files/dravite_models_with_YZ_inversion/dravite_inver_2_1.txt
- ejm-2021-65-supplement-version2/supplementary_files/Structure_and_eigendisplacement_files/dravite_models_with_YZ_inversion/dravite_inver_2_8_PBE.cif
- ejm-2021-65-supplement-version2/supplementary_files/Structure_and_eigendisplacement_files/dravite_models_with_YZ_inversion/dravite_inver_2_4.txt
- ejm-2021-65-supplement-version2/supplementary_files/Structure_and_eigendisplacement_files/dravite_models_with_YZ_inversion/dravite_inver_2_2.txt
- ejm-2021-65-supplement-version2/supplementary_files/Structure_and_eigendisplacement_files/dravite_models_with_YZ_inversion/dravite_inver_3_1_PBE.cif
- ejm-2021-65-supplement-version2/supplementary_files/Structure_and_eigendisplacement_files/dravite_models_with_YZ_inversion/read_me.txt
- ejm-2021-65-supplement-version2/supplementary_files/Structure_and_eigendisplacement_files/dravite_models_with_YZ_inversion/dravite_Mg_Al_3.txt
- ejm-2021-65-supplement-version2/supplementary_files/Structure_and_eigendisplacement_files/dravite_models_with_YZ_inversion/dravite_inver_3_3.txt
- ejm-2021-65-supplement-version2/supplementary_files/Structure_and_eigendisplacement_files/dravite_models_with_YZ_inversion/dravite_inver_2_8.txt
- ejm-2021-65-supplement-version2/supplementary_files/Structure_and_eigendisplacement_files/dravite_models_with_YZ_inversion/dravite_inver_2_9.txt
- ejm-2021-65-supplement-version2/supplementary_files/Structure_and_eigendisplacement_files/dravite_models_with_YZ_inversion/dravite_inver_3_3_PBE.cif
- ejm-2021-65-supplement-version2/supplementary_files/Structure_and_eigendisplacement_files/dravite_models_with_YZ_inversion/dravite_inver_2_2_PBE.cif
- ejm-2021-65-supplement-version2/supplementary_files/Structure_and_eigendisplacement_files/dravite_models_with_YZ_inversion/dravite_inver_2_6_PBE.cif
- ejm-2021-65-supplement-version2/supplementary_files/Structure_and_eigendisplacement_files/dravite_models_with_YZ_inversion/dravite_inver_Mg_Al_3_PBE.cif
- ejm-2021-65-supplement-version2/supplementary_files/Structure_and_eigendisplacement_files/dravite_models_with_YZ_inversion/dravite_inver_2_7.txt
- ejm-2021-65-supplement-version2/supplementary_files/Structure_and_eigendisplacement_files/dravite_models_with_YZ_inversion/dravite_inver_2_4_PBE.cif
- ejm-2021-65-supplement-version2/supplementary_files/Structure_and_eigendisplacement_files/dravite_models_with_YZ_inversion/dravite_inver_2_3.txt
- ejm-2021-65-supplement-version2/supplementary_files/Structure_and_eigendisplacement_files/dravite_models_with_YZ_inversion/dravite_inver_2_7_PBE.cif
- ejm-2021-65-supplement-version2/supplementary_files/Structure_and_eigendisplacement_files/dravite_models_with_YZ_inversion/dravite_inver_Mg_Al_2_PBE.cif
- ejm-2021-65-supplement-version2/supplementary_files/Structure_and_eigendisplacement_files/dravite_models_with_YZ_inversion/dravite_inver_3_2.txt
- ejm-2021-65-supplement-version2/supplementary_files/Structure_and_eigendisplacement_files/dravite_models_with_YZ_inversion/dravite_inver_2_3_PBE.cif
- ejm-2021-65-supplement-version2/supplementary_files/Structure_and_eigendisplacement_files/dravite_models_with_YZ_inversion/dravite_inver_2_5_PBE.cif
- ejm-2021-65-supplement-version2/supplementary_files/Structure_and_eigendisplacement_files/dravite_models_with_YZ_inversion/dravite_inver_3_2_PBE.cif
- ejm-2021-65-supplement-version2/supplementary_files/Structure_and_eigendisplacement_files/dravite_models_with_YZ_inversion/dravite_inver_3_1.txt
- ejm-2021-65-supplement-version2/supplementary_files/Structure_and_eigendisplacement_files/dravite_models_with_YZ_inversion/dravite_inver_2_9_PBE.cif
- ejm-2021-65-supplement-version2/supplementary_files/Structure_and_eigendisplacement_files/dravite_models_with_YZ_inversion/dravite_inver_2_6.txt
- ejm-2021-65-supplement-version2/supplementary_files/Electronic supplementary information.pdf
- ejm-34-239-2022-supplement-title-page.pdf
