# Supplementary material for: Theoretical OH stretching vibrations in dravite
Source: Copernicus journal article supplement (doi:10.5194/ejm-34-239-2022), 2022-04-13
Supplement: Supplementary file 3 [file ejm-34-239-2022-supplement.zip › ejm-2021-65-supplement-version2/supplementary_files/Structure_and_eigendisplacement_files/chemically_disordered_models_1x1x2_hexagonal_supercell/dravite_112_2Al_vacancy_conf1.cif]

#======================================================================

# CRYSTAL DATA

#----------------------------------------------------------------------

data_VESTA_phase_1


_pd_phase_name                         
_cell_length_a 16.1067867
_cell_length_b 16.1067867
_cell_length_c 14.55806160
_cell_angle_alpha                      90
_cell_angle_beta                       90
_cell_angle_gamma                      120
_symmetry_space_group_name_H-M         'P1'
_symmetry_Int_Tables_number            1

loop_
_symmetry_equiv_pos_as_xyz
   'x, y, z'

loop_
   _atom_site_label
   _atom_site_fract_x
   _atom_site_fract_y
   _atom_site_fract_z
Na       0.000271494   0.000213740   0.138143026
Na      -0.000834985  -0.000330410   0.638036761
Na       0.666524230   0.333242696   0.305606347
Na       0.666349902   0.333142467   0.804636328
Na       0.336266336   0.668154180   0.966634929
Mg       0.127476952   0.063728869   0.322071522
Mg       0.125991864   0.062990516   0.823193555
Mg       0.937227369   0.063779317   0.322735217
Mg       0.936135313   0.062922794   0.823146953
Mg       0.937230908   0.873435694   0.322652499
Mg       0.936142134   0.873203082   0.823064024
Mg       0.793133966   0.396562721   0.490034922
Mg       0.793376156   0.396703017   0.989234977
Mg       0.603801901   0.396677948   0.490110547
Mg       0.603046100   0.396908659   0.989563548
Mg       0.603793371   0.207113581   0.490104191
Mg       0.603067465   0.206203571   0.989621565
Mg       0.461242376   0.730630831   0.159681522
Mg       0.458187882   0.729096944   0.652027835
Al       0.268831759   0.730958424   0.162154862
Mg       0.271018949   0.729174278   0.652089958
Al       0.268825287   0.537897178   0.162163068
Mg       0.271020001   0.541850308   0.652087560
Al       0.299549645   0.262383985   0.316643218
Al       0.297886342   0.261414035   0.815633433
Al       0.738319313   0.037089869   0.316971831
Al       0.737707433   0.036273817   0.816029435
Al       0.963010347   0.701021570   0.316360054
Al       0.962932059   0.701697687   0.815324748
Al       0.738320139   0.701244165   0.316957077
Al       0.737705165   0.701440707   0.816012073
Al       0.962999104   0.261986470   0.316388330
Al       0.962939674   0.261239111   0.815348024
Al       0.299564820   0.037196441   0.316636726
Al       0.297890381   0.036480131   0.815630400
Al       0.964715467   0.594713787   0.483452777
Al       0.965497074   0.595263527   0.981005472
Al       0.405796982   0.370263430   0.483577292
Al       0.404416563   0.369613300   0.981786038
Al       0.630698613   0.035651075   0.483936628
Al       0.627992732   0.032397829   0.982347102
Al       0.405789804   0.035540717   0.483576845
Al       0.404439524   0.034848494   0.981790800
Al       0.630692701   0.595045136   0.483923295
Al       0.627985563   0.595623411   0.982333415
Al       0.964709517   0.369990537   0.483473853
Al       0.965498474   0.370247325   0.981019301
Al       0.631126732   0.927450090   0.151176423
Al       0.631352036   0.927913432   0.649342744
Al       0.070252764   0.701812781   0.149719143
Al       0.072028273   0.703473486   0.649151273
Al       0.298779956   0.368495419   0.150270900
Al       0.296533625   0.368459297   0.649092343
Al       0.070245239   0.368446546   0.149740060
Al       0.072033264   0.368569340   0.649166547
Al       0.298795947   0.930317399   0.150259112
Al       0.296534593   0.928077770   0.649103149
Al       0.631115123   0.703703962   0.151165353
Al       0.631353073   0.703436107   0.649327147
Si       0.191892280   0.190565575   0.008168841
Si       0.192971134   0.190970299   0.506969158
Si       0.808180335   0.001524080   0.008535545
Si       0.809761838   0.002186924   0.507773431
Si       0.997661952   0.806820101   0.008093847
Si       0.998569564   0.807547449   0.507184533
Si       0.808178201   0.806668990   0.008511348
Si       0.809762176   0.807564502   0.507746569
Si       0.997652253   0.190837902   0.008119735
Si       0.998559541   0.191008653   0.507228475
Si       0.191906638   0.001343576   0.008166016
Si       0.192976921   0.002007338   0.506958569
Si       0.859698272   0.524096242   0.173934356
Si       0.859014307   0.524025164   0.674778131
Si       0.476282377   0.335504087   0.174447794
Si       0.475873547   0.334979892   0.674959314
Si       0.664688881   0.140108081   0.174357822
Si       0.664895187   0.140919843   0.675099039
Si       0.476296782   0.140819300   0.174452285
Si       0.475872793   0.140896889   0.674956054
Si       0.664685802   0.524608640   0.174338104
Si       0.664898671   0.523969187   0.675091522
Si       0.859699899   0.335611463   0.173945024
Si       0.859013006   0.334976552   0.674794752
Si       0.527043619   0.857655081   0.343678451
Si       0.524769339   0.856362646   0.840975817
Si       0.143993104   0.669393663   0.343618201
Si       0.143044419   0.668691475   0.840979534
Si       0.331960050   0.475750541   0.344421364
Si       0.330703573   0.473821532   0.841096815
Si       0.143986576   0.474617090   0.343635251
Si       0.143051185   0.474366126   0.840987513
Si       0.331971550   0.856241612   0.344397944
Si       0.330714865   0.856899356   0.841106831
Si       0.527037818   0.669403799   0.343682175
Si       0.524759618   0.668406304   0.840959648
B        0.111249825   0.222084059   0.235955454
B        0.109902651   0.220066782   0.736856391
B        0.779770322   0.889897843   0.237132286
B        0.779240710   0.889620659   0.737198706
B        0.111263999   0.889179570   0.235919886
B        0.109902448   0.889841401   0.736826447
B        0.777080751   0.553371202   0.403278899
B        0.776519593   0.554199452   0.904153733
B        0.446864373   0.223440891   0.403339885
B        0.445791992   0.222904851   0.903949434
B        0.777069178   0.223705787   0.403284272
B        0.776522580   0.222336858   0.904183467
B        0.439583482   0.884461027   0.073645537
B        0.444447958   0.888552001   0.571661534
B        0.114451919   0.557227876   0.074126048
B        0.111752871   0.555880171   0.571443371
B        0.439562948   0.555137517   0.073644453
B        0.444451836   0.555910093   0.571657111
O        0.001313224   0.000638574   0.394988420
O       -0.000570729  -0.000318555   0.897382624
O        0.666764386   0.333442683   0.063845045
O        0.666948152   0.333460414   0.563435729
O        0.322727718   0.661387398   0.230127830
O        0.333115674   0.666562920   0.729449752
O        0.063340271   0.125958383   0.248043112
O        0.061580480   0.123703393   0.749430457
O        0.876242935   0.938131037   0.248580785
O        0.875653178   0.937831830   0.749449670
O        0.063349425   0.937391607   0.247990217
O        0.061589490   0.937893488   0.749364155
O        0.728854847   0.457057686   0.415020158
O        0.728690785   0.457815915   0.916940150
O        0.543096427   0.271555542   0.415278616
O        0.542120806   0.271067252   0.916613857
O        0.728843563   0.271793594   0.415008653
O        0.728693149   0.270890698   0.916990891
O        0.384479005   0.786050767   0.092079222
O        0.397084905   0.794119445   0.585691944
O        0.213148655   0.606579837   0.095583217
O        0.206171284   0.603086106   0.585435040
O        0.384465154   0.598450537   0.092079950
O        0.397083273   0.602972043   0.585698071
O        0.271248128   0.135628315   0.264911201
O        0.269940271   0.134968053   0.766637645
O        0.865469969   0.136243414   0.265356780
O        0.864518008   0.134852528   0.766559571
O        0.865465976   0.729220492   0.265322614
O        0.864509116   0.729663249   0.766529318
O        0.936970899   0.468482283   0.433331190
O        0.938223536   0.469116588   0.932355269
O        0.532024261   0.468357197   0.433596094
O        0.530208119   0.468833012   0.933056126
O        0.532028415   0.063681849   0.433597170
O        0.530214789   0.061399217   0.933082029
O        0.600892145   0.800463787   0.100792493
O        0.604104190   0.802057974   0.599088398
O        0.205710583   0.793858347   0.099269230
O        0.197941848   0.802067975   0.599121463
O        0.205693592   0.411841887   0.099303054
O        0.197941900   0.395877631   0.599102614
O        0.091140824   0.183503637   0.043628906
O        0.092080800   0.183518364   0.541316962
O        0.816943625   0.908475704   0.043375489
O        0.817251096   0.908617197   0.541915257
O        0.091150180   0.907645842   0.043605548
O        0.092083512   0.908560625   0.541282678
O        0.760876277   0.521336625   0.206983473
O        0.758300863   0.516532583   0.710522900
O        0.478700031   0.239367487   0.208702916
O        0.483069801   0.241535359   0.710559993
O        0.760884767   0.239556555   0.207009958
O        0.758296405   0.241757302   0.710539790
O        0.427158043   0.852828589   0.375925976
O        0.423876550   0.849030610   0.877232267
O        0.147339955   0.573682378   0.373857852
O        0.151203946   0.575607904   0.877452996
O        0.427146673   0.574354754   0.375947773
O        0.423872372   0.574845721   0.877215849
O        0.187500452   0.093753019   0.053977698
O        0.187135817   0.093567750   0.551924471
O        0.904733731   0.094725109   0.054173285
O        0.907287112   0.093799146   0.552825599
O        0.904739102   0.810019249   0.054133538
O        0.907284470   0.813461401   0.552773269
O        0.849945058   0.424978831   0.219348465
O        0.854060535   0.427026663   0.720247575
O        0.575442363   0.425006396   0.219607883
O        0.572994008   0.426788366   0.720508070
O        0.575448557   0.150472414   0.219625401
O        0.572989145   0.146198696   0.720506910
O        0.525660176   0.762840409   0.387845371
O        0.517508999   0.758754775   0.888296619
O        0.238490915   0.761739101   0.388645751
O        0.239459710   0.760105348   0.888985974
O        0.238482819   0.476775892   0.388676877
O        0.239460193   0.479364244   0.888995422
O        0.199450520   0.190161750   0.396082782
O        0.198476553   0.189623672   0.897786878
O        0.811356614   0.010186740   0.396999644
O        0.809561453   0.008863819   0.898050779
O        0.991687552   0.801211467   0.396282290
O        0.990468507   0.800765608   0.897706084
O        0.811368182   0.801176622   0.396971173
O        0.809564285   0.800713320   0.898026373
O        0.991664385   0.190471030   0.396329402
O        0.990452987   0.189694678   0.897732665
O        0.199454548   0.009292401   0.396071549
O        0.198476916   0.008852643   0.897783898
O        0.868274857   0.523516913   0.063596322
O        0.864411239   0.522927177   0.564046713
O        0.476221353   0.343161619   0.064015558
O        0.477302024   0.341507457   0.564232262
O        0.654195264   0.130794225   0.064102681
O        0.658745249   0.135911863   0.564361615
O        0.476237014   0.133112001   0.064019407
O        0.477293540   0.135794229   0.564230008
O        0.654195510   0.523432165   0.064082024
O        0.658736041   0.522825571   0.564353979
O        0.868273803   0.344785774   0.063608674
O        0.864404103   0.341468926   0.564062687
O        0.530531553   0.855109062   0.232094428
O        0.532265214   0.855571507   0.730982108
O        0.151647505   0.679231880   0.230351272
O        0.144228101   0.676776558   0.730964544
O        0.320741148   0.473193621   0.231273845
O        0.322625256   0.466961306   0.731079026
O        0.151636821   0.472421163   0.230368312
O        0.144238579   0.467464779   0.730970410
O        0.320765613   0.847576850   0.231252450
O        0.322641579   0.855668621   0.731087448
O        0.530517742   0.675425084   0.232094988
O        0.532259117   0.676694549   0.730966628
O        0.283260016   0.287400955   0.050350619
O        0.284886244   0.286410356   0.549005206
O        0.710904390  -0.004326826   0.050262844
O        0.714480961  -0.001123723   0.550035745
O        1.004369325   0.715780038   0.049766086
O        1.001887609   0.715400307   0.548995142
O        0.710893166   0.715255682   0.050245636
O        0.714480113   0.715599950   0.550014962
O        1.004361801   0.288591747   0.049780717
O        1.001879111   0.286479200   0.549028281
O        0.283282092  -0.004105979   0.050351106
O        0.284886341  -0.001520717   0.549001695
O        0.953929989   0.618321289   0.216335978
O        0.951127905   0.619862672   0.716562809
O        0.381951138   0.335347781   0.216916641
O        0.380011958   0.331254592   0.716751599
O        0.666409022   0.047268264   0.216842342
O        0.668393559   0.048775963   0.717021215
O        0.381966635   0.046639542   0.216914361
O        0.380016151   0.048757024   0.716749622
O        0.666416204   0.619171555   0.216824645
O        0.668388865   0.619612976   0.717006357
O        0.953929221   0.335613431   0.216348297
O        0.951128455   0.331260866   0.716582762
O        0.619096030   0.954416967   0.383448426
O        0.616772386   0.951955173   0.883599180
O        0.046824116   0.664498159   0.381007338
O        0.047035766   0.664465979   0.883303599
O        0.336088869   0.382679047   0.381294793
O        0.334702985   0.382087716   0.883813495
O        0.046816099   0.382339194   0.381024680
O        0.047039586   0.382580638   0.883310645
O        0.336103963   0.953440214   0.381276855
O        0.334722213   0.952636569   0.883820408
O        0.619093646   0.664689084   0.383438088
O        0.616771007   0.664833133   0.883583505
O        0.211734273   0.274273660   0.230417490
O        0.210142670   0.270933640   0.730995313
O        0.728390572   0.938893908   0.231599685
O        0.728327152   0.938900649   0.731548127
O        0.062693725   0.788696144   0.229926241
O        0.060735357   0.789595648   0.731093027
O        0.728372043   0.789522155   0.231601562
O        0.728329707   0.789427316   0.731520600
O        0.062679344   0.273994576   0.229948998
O        0.060743282   0.271150604   0.731115311
O        0.211750384   0.937479183   0.230409273
O        0.210146928   0.939206280   0.731001047
O        0.877467741   0.604345135   0.397180222
O        0.876964724   0.605199578   0.898303004
O        0.395735681   0.272647422   0.397470256
O        0.394591889   0.272008880   0.898367234
O        0.728258996   0.123626357   0.397790450
O        0.727034258   0.122115758   0.898700988
O        0.395726073   0.123106247   0.397482486
O        0.394594571   0.122600459   0.898362807
O        0.728265639   0.604638284   0.397775859
O        0.727036986   0.604939824   0.898685340
O        0.877456697   0.273120222   0.397198489
O        0.876965260   0.271780004   0.898321746
O        0.538247156   0.929832322   0.064105874
O        0.545207207   0.940348320   0.565340492
O        0.066374878   0.607430204   0.065065843
O        0.060099416   0.604976974   0.564747749
O        0.393384196   0.456283308   0.066462714
O        0.395240528   0.455092239   0.564975105
O        0.066382426   0.458946869   0.065066501
O        0.060092914   0.455127046   0.564751230
O        0.393420046   0.937152243   0.066476620
O        0.395229927   0.940151891   0.564981850
O        0.538227353   0.608424961   0.064100465
O        0.545209053   0.604880454   0.565323187
H        0.001907562   0.000791971   0.460878963
H       -0.002362185  -0.001447510   0.963208489
H        0.666971177   0.333704556   0.129727674
H        0.666850856   0.333358324   0.629289587
H        0.323155262   0.661609326   0.296866412
H        0.333591669   0.666893561   0.795196830
H        0.269769279   0.134880527   0.198111677
H        0.269017869   0.134506581   0.699836999
H        0.865666987   0.134732672   0.198559138
H        0.864756379   0.134107502   0.699756391
H        0.865645597   0.730900286   0.198524448
H        0.864735184   0.730637182   0.699725622
H        0.935888423   0.467927687   0.366619050
H        0.937636973   0.468815482   0.865494367
H        0.532403328   0.468501010   0.366879012
H        0.530580921   0.468711019   0.866213088
H        0.532412518   0.063918837   0.366879420
H        0.530585244   0.061855492   0.866239737
H        0.602218625   0.801139701   0.033981806
H        0.601570915   0.800794142   0.532284994
H        0.207471912   0.792974703   0.032133545
H        0.198987451   0.800912779   0.532358909
H        0.207432403   0.414468333   0.032171693
H        0.198970412   0.398059102   0.532337682
