# Supplementary material for: Theoretical OH stretching vibrations in dravite
Source: Copernicus journal article supplement (doi:10.5194/ejm-34-239-2022), 2022-04-13
Supplement: Supplementary file 3 [file ejm-34-239-2022-supplement.zip › ejm-2021-65-supplement-version2/supplementary_files/Structure_and_eigendisplacement_files/chemically_disordered_models_1x1x2_hexagonal_supercell/dravite_112_2Al_vacancy_conf2.cif]

#======================================================================

# CRYSTAL DATA

#----------------------------------------------------------------------

data_VESTA_phase_1


_pd_phase_name                         
_cell_length_a 16.1067867
_cell_length_b 16.1067867
_cell_length_c 14.55806160
_cell_angle_alpha                      90
_cell_angle_beta                       90
_cell_angle_gamma                      120
_symmetry_space_group_name_H-M         'P1'
_symmetry_Int_Tables_number            1

loop_
_symmetry_equiv_pos_as_xyz
   'x, y, z'

loop_
   _atom_site_label
   _atom_site_fract_x
   _atom_site_fract_y
   _atom_site_fract_z
Na       0.000076143   0.000108853   0.137773900
Na      -0.000832164  -0.000351096   0.638398502
Na       0.666377860   0.333165572   0.305544831
Na       0.666434724   0.333172816   0.804823134
Na       0.336611438   0.668304712   0.475853497
Mg       0.127323810   0.063665846   0.322020560
Mg       0.126084105   0.063041833   0.823239174
Mg       0.937161578   0.063718389   0.322661635
Mg       0.936132321   0.062981736   0.823185337
Mg       0.937165477   0.873444825   0.322584928
Mg       0.936133896   0.873143799   0.823124031
Mg       0.793402899   0.396698111   0.489966939
Mg       0.793271961   0.396644599   0.989163507
Mg       0.603649218   0.396833741   0.490141413
Mg       0.603161828   0.396754192   0.989518937
Mg       0.603633015   0.206800207   0.490149240
Mg       0.603177633   0.206443451   0.989575549
Mg       0.460475089   0.730239530   0.152565732
Mg       0.459309035   0.729655007   0.660053098
Al       0.269138483   0.730279095   0.157078563
Mg       0.270477562   0.729644151   0.659504919
Al       0.269130753   0.538868836   0.157072372
Mg       0.270484939   0.540841697   0.659485912
Al       0.299411291   0.262130375   0.315994693
Al       0.298048491   0.261641733   0.816344762
Al       0.738347857   0.037045529   0.316225337
Al       0.737527437   0.036275042   0.816767438
Al       0.962882893   0.701104529   0.315614451
Al       0.963041773   0.701555434   0.815989089
Al       0.738356423   0.701321519   0.316208570
Al       0.737529174   0.701253372   0.816756947
Al       0.962873277   0.261789760   0.315635693
Al       0.963048920   0.261486443   0.816000333
Al       0.299423318   0.037316822   0.315995390
Al       0.298048543   0.036403673   0.816354354
Al       0.965457595   0.595110330   0.483281240
Al       0.965232584   0.594879978   0.981010573
Al       0.405349696   0.370559853   0.483520142
Al       0.404842754   0.369534686   0.981861714
Al       0.630287043   0.034828448   0.483769290
Al       0.627930333   0.032798587   0.982449637
Al       0.405333061   0.034790962   0.483525404
Al       0.404851040   0.035323729   0.981879317
Al       0.630290827   0.595460289   0.483758720
Al       0.627927556   0.595140279   0.982432747
Al       0.965446911   0.370341891   0.483298958
Al       0.965232128   0.370362770   0.981016133
Al       0.631154021   0.927434373   0.149903413
Al       0.631382940   0.927900620   0.650539017
Al       0.070257168   0.701805714   0.148606238
Al       0.072111725   0.703533334   0.650188785
Al       0.298725180   0.368350552   0.149237162
Al       0.296450386   0.368445583   0.650258442
Al       0.070247452   0.368460723   0.148613822
Al       0.072111657   0.368595617   0.650195298
Al       0.298734044   0.930392086   0.149242429
Al       0.296441043   0.928001251   0.650276178
Al       0.631151202   0.703741763   0.149886064
Al       0.631389711   0.703477588   0.650526371
Si       0.191747814   0.190392674   0.008249239
Si       0.193126262   0.191196469   0.506920940
Si       0.808406279   0.001596560   0.008587512
Si       0.809471845   0.002114444   0.507620524
Si       0.997689324   0.806941977   0.008134690
Si       0.998575035   0.807314735   0.507037059
Si       0.808403470   0.806820862   0.008569067
Si       0.809475213   0.807355268   0.507596121
Si       0.997681439   0.190746018   0.008147159
Si       0.998563525   0.191256373   0.507069860
Si       0.191758957   0.001374629   0.008255972
Si       0.193132988   0.001954634   0.506918550
Si       0.859556547   0.524009993   0.174019751
Si       0.859297029   0.524083192   0.674651895
Si       0.476340708   0.335352694   0.174617751
Si       0.475858474   0.335173538   0.674906103
Si       0.664703747   0.140233953   0.174467837
Si       0.664778596   0.140730483   0.674973306
Si       0.476350215   0.141010277   0.174627178
Si       0.475852379   0.140686360   0.674910162
Si       0.664704943   0.524494389   0.174440958
Si       0.664786753   0.524040211   0.674961789
Si       0.859553225   0.335559833   0.174028106
Si       0.859287569   0.335187324   0.674667294
Si       0.526834387   0.857292172   0.341732586
Si       0.524786584   0.856598640   0.842693354
Si       0.143950617   0.669493398   0.341714454
Si       0.142882616   0.668420127   0.842451284
Si       0.331409680   0.475288640   0.342471626
Si       0.331073029   0.474009174   0.842700768
Si       0.143943862   0.474491853   0.341718598
Si       0.142892058   0.474469747   0.842452328
Si       0.331419658   0.856151355   0.342465555
Si       0.331075169   0.857066756   0.842716437
Si       0.526841172   0.669555533   0.341731329
Si       0.524786359   0.668187258   0.842679265
B        0.111160009   0.221950433   0.235586558
B        0.109928539   0.220098370   0.737084886
B        0.779723047   0.889875115   0.236816699
B        0.779242770   0.889620863   0.737490426
B        0.111171122   0.889234209   0.235572209
B        0.109921880   0.889834377   0.737071205
B        0.777173072   0.553747969   0.403362134
B        0.776417894   0.553853903   0.904108757
B        0.446504006   0.223261268   0.403510790
B        0.446156418   0.223079124   0.903867138
B        0.777157511   0.223421477   0.403368300
B        0.776417830   0.222569100   0.904134717
B        0.439927629   0.885429162   0.073702925
B        0.443620341   0.886847133   0.571522810
B        0.113948319   0.556976201   0.073483124
B        0.113758852   0.556886825   0.570838020
B        0.439922224   0.554501376   0.073699381
B        0.443636808   0.556784018   0.571519928
O        0.001218534   0.000604309   0.395137260
O       -0.000531227  -0.000287378   0.897255285
O        0.666893440   0.333488608   0.063902822
O        0.666994186   0.333484283   0.563373723
O        0.322902872   0.661454418   0.226328031
O        0.333024141   0.666512807   0.735019820
O        0.063166954   0.125850965   0.248114177
O        0.061592122   0.123718769   0.749301550
O        0.876165739   0.938096756   0.248665931
O        0.875678409   0.937846127   0.749352025
O        0.063179605   0.937344566   0.248075856
O        0.061593342   0.937886458   0.749255587
O        0.728972578   0.457434721   0.415441507
O        0.728566312   0.457447230   0.916587225
O        0.542730111   0.271369018   0.415824579
O        0.542510254   0.271253246   0.916183047
O        0.728953994   0.271530661   0.415436712
O        0.728567773   0.271123965   0.916640642
O        0.385867883   0.789204450   0.094373123
O        0.395450930   0.790596556   0.584534103
O        0.210907011   0.605459941   0.096465882
O        0.210032097   0.605018504   0.583587152
O        0.385869528   0.596672585   0.094374286
O        0.395456898   0.604853715   0.584533035
O        0.271052919   0.135537797   0.264705797
O        0.270175478   0.135083061   0.766925123
O        0.865469501   0.136110094   0.265031764
O        0.864472883   0.135021633   0.766821570
O        0.865465417   0.729359964   0.264997694
O        0.864469389   0.729447430   0.766806476
O        0.937902533   0.468946906   0.432893048
O        0.937482163   0.468746865   0.932482244
O        0.531416789   0.468865256   0.433260598
O        0.530633263   0.468276437   0.933295748
O        0.531415845   0.062566036   0.433270730
O        0.530627385   0.062352737   0.933331142
O        0.601862045   0.800940776   0.098887380
O        0.603524677   0.801767098   0.600880856
O        0.205555846   0.793665205   0.097367987
O        0.198229171   0.801799428   0.600715561
O        0.205543711   0.411879720   0.097378247
O        0.198233140   0.396436031   0.600693387
O        0.091463859   0.184155686   0.043833054
O        0.092000246   0.183469755   0.541103394
O        0.816614640   0.908311124   0.043525523
O        0.817325462   0.908657999   0.541651601
O        0.091467899   0.907321684   0.043821137
O        0.092000487   0.908547531   0.541074837
O        0.760805287   0.521205393   0.207655301
O        0.758362554   0.516553115   0.709429156
O        0.478914984   0.239467756   0.209731846
O        0.483091644   0.241547582   0.709567164
O        0.760803528   0.239623079   0.207679518
O        0.758356034   0.241787096   0.709458651
O        0.424933396   0.848887430   0.375050783
O        0.426037244   0.853198564   0.877558074
O        0.150918586   0.575479146   0.373531510
O        0.146975660   0.573489574   0.877702096
O        0.424939448   0.576058540   0.375050318
O        0.426035900   0.572839829   0.877538582
O        0.186468590   0.093241351   0.054191055
O        0.187734707   0.093877179   0.551738682
O        0.905322122   0.094269687   0.054320557
O        0.906866117   0.094152756   0.552452332
O        0.905317961   0.811049384   0.054293026
O        0.906868492   0.812705475   0.552408521
O        0.850174632   0.425096225   0.219735483
O        0.853924212   0.426953579   0.720120576
O        0.575309657   0.425096624   0.219982051
O        0.573137232   0.426739804   0.720369507
O        0.575308464   0.150231784   0.220013447
O        0.573129243   0.146389096   0.720371159
O        0.520756202   0.760383006   0.388118551
O        0.523095981   0.761545432   0.887718337
O        0.240424750   0.759492365   0.388653425
O        0.237169499   0.762354535   0.888355330
O        0.240438584   0.481003900   0.388652372
O        0.237174836   0.474817535   0.888360230
O        0.199634709   0.190458865   0.396032070
O        0.198296961   0.189307210   0.897881969
O        0.810925940   0.010045608   0.396846749
O        0.809939472   0.009046089   0.898123156
O        0.991752775   0.800963820   0.396126621
O        0.990410130   0.800977714   0.897765611
O        0.810937801   0.800893696   0.396820996
O        0.809937795   0.800905958   0.898103889
O        0.991733775   0.190801300   0.396162488
O        0.990398743   0.189424644   0.897779384
O        0.199643747   0.009218870   0.396030280
O        0.198293174   0.008996532   0.897887252
O        0.867681959   0.523284804   0.063724807
O        0.865796604   0.523088512   0.563932629
O        0.476416141   0.342309925   0.064195634
O        0.477138845   0.342655994   0.564182012
O        0.654667251   0.131578300   0.064236134
O        0.657689382   0.134616962   0.564232688
O        0.476429589   0.134132272   0.064205118
O        0.477115270   0.134473868   0.564186747
O        0.654673857   0.523101630   0.064207297
O        0.657687894   0.523064971   0.564221220
O        0.867680780   0.344428944   0.063734322
O        0.865775973   0.342670398   0.563946571
O        0.531041486   0.854228579   0.230972743
O        0.531695077   0.856504495   0.731818163
O        0.151653602   0.679808690   0.229364432
O        0.143480917   0.675349086   0.731610247
O        0.319007297   0.471585970   0.230479699
O        0.323867414   0.467525063   0.731857264
O        0.151637430   0.471864452   0.229367464
O        0.143499905   0.468148453   0.731608146
O        0.319047106   0.847454239   0.230472068
O        0.323874025   0.856341905   0.731872004
O        0.531041638   0.676818338   0.230970175
O        0.531692372   0.675186765   0.731804050
O        0.283484581   0.286597725   0.050508504
O        0.284801509   0.287177608   0.548939487
O        0.711719968  -0.003261990   0.050363654
O        0.713612679  -0.002071498   0.549842683
O        1.003458370   0.715505957   0.049809621
O        1.002717776   0.715436137   0.548833415
O        0.711716879   0.714994657   0.050348046
O        0.713621060   0.715682255   0.549826462
O        1.003447025   0.287952947   0.049814723
O        1.002715265   0.287286667   0.548854099
O        0.283493175  -0.003095594   0.050521915
O        0.284796053  -0.002366624   0.548946093
O        0.953837446   0.618328119   0.216391266
O        0.951297718   0.619957564   0.716306647
O        0.381950397   0.335205738   0.217082571
O        0.379963564   0.331313454   0.716568928
O        0.666312285   0.047269436   0.216958426
O        0.668457754   0.048721397   0.716788015
O        0.381958942   0.046771149   0.217090090
O        0.379963414   0.048645384   0.716575255
O        0.666317544   0.619067208   0.216937420
O        0.668459041   0.619728782   0.716775113
O        0.953833495   0.335517700   0.216395514
O        0.951295382   0.331327247   0.716319050
O        0.618135577   0.953288671   0.383161039
O        0.617610140   0.953056128   0.883671643
O        0.047541073   0.664634053   0.380746082
O        0.046166027   0.664365327   0.883237016
O        0.335790666   0.383208428   0.381281024
O        0.334890206   0.381352025   0.883843566
O        0.047539776   0.382933972   0.380759365
O        0.046169386   0.381810020   0.883236867
O        0.335811006   0.952617829   0.381271182
O        0.334889770   0.953539630   0.883862446
O        0.618145896   0.664862230   0.383154749
O        0.617612283   0.664560031   0.883659140
O        0.211621848   0.273957743   0.230014912
O        0.210169703   0.270945397   0.731263364
O        0.728340404   0.938866380   0.231261230
O        0.728337852   0.938912109   0.731852447
O        0.062690729   0.788731435   0.229543689
O        0.060791132   0.789590299   0.731317812
O        0.728330842   0.789500625   0.231261913
O        0.728344717   0.789423754   0.731829132
O        0.062686422   0.273976753   0.229553393
O        0.060800973   0.271213228   0.731328502
O        0.211634604   0.937680578   0.230029583
O        0.210166528   0.939220724   0.731276577
O        0.877678442   0.604645936   0.397226383
O        0.876725248   0.604865576   0.898247415
O        0.395455924   0.272666692   0.397582896
O        0.394931361   0.272016993   0.898310811
O        0.728083783   0.123186306   0.397790268
O        0.727091872   0.122503494   0.898698259
O        0.395444821   0.122808802   0.397596037
O        0.394927504   0.122915871   0.898317293
O        0.728095290   0.604906848   0.397776236
O        0.727102241   0.604605619   0.898686173
O        0.877664176   0.273034164   0.397237631
O        0.876723799   0.271868722   0.898257703
O        0.539184436   0.931466217   0.064240838
O        0.543786269   0.937907480   0.564975319
O        0.065139883   0.606882172   0.064759938
O        0.062705295   0.606076047   0.564169840
O        0.394117900   0.455278526   0.066281320
O        0.394206130   0.456547753   0.564623669
O        0.065151975   0.458261905   0.064748322
O        0.062694036   0.456641942   0.564169046
O        0.394135917   0.938862032   0.066298344
O        0.394178233   0.937644312   0.564633758
O        0.539179285   0.607714384   0.064232137
O        0.543801209   0.605899709   0.564966430
H        0.001900308   0.000801232   0.461026285
H       -0.002349702  -0.001379827   0.963080294
H        0.666926191   0.333646099   0.129776754
H        0.667056159   0.333496393   0.629242643
H        0.320714760   0.660340701   0.292493780
H        0.333262922   0.666639051   0.801318902
H        0.269355899   0.134693602   0.197887719
H        0.269493824   0.134737906   0.700148581
H        0.865815764   0.134491612   0.198217336
H        0.864560822   0.134388735   0.700042208
H        0.865789752   0.731305264   0.198182648
H        0.864542795   0.730149535   0.700027104
H        0.935664361   0.467822767   0.366175739
H        0.938183507   0.469097286   0.865657746
H        0.532383662   0.468376437   0.366524350
H        0.530305428   0.468840790   0.866491228
H        0.532385920   0.064044142   0.366534300
H        0.530289968   0.061410482   0.866528894
H        0.602046559   0.801045182   0.031965090
H        0.601938587   0.800976168   0.534138680
H        0.207687516   0.792271991   0.030129152
H        0.198856266   0.801059627   0.534009097
H        0.207668037   0.415391877   0.030137371
H        0.198829704   0.397745558   0.533984805
