# Supplementary material for: Theoretical OH stretching vibrations in dravite
Source: Copernicus journal article supplement (doi:10.5194/ejm-34-239-2022), 2022-04-13
Supplement: Supplementary file 3 [file ejm-34-239-2022-supplement.zip › ejm-2021-65-supplement-version2/supplementary_files/Structure_and_eigendisplacement_files/chemically_disordered_models_1x1x2_hexagonal_supercell/dravite_112_Al.cif]

#======================================================================

# CRYSTAL DATA

#----------------------------------------------------------------------

data_VESTA_phase_1


_pd_phase_name                         
_cell_length_a 16.1067867
_cell_length_b 16.1067867
_cell_length_c 14.55806160
_cell_angle_alpha                      90
_cell_angle_beta                       90
_cell_angle_gamma                      120
_symmetry_space_group_name_H-M         'P1'
_symmetry_Int_Tables_number            1

loop_
_symmetry_equiv_pos_as_xyz
   'x, y, z'

loop_
   _atom_site_label
   _atom_site_fract_x
   _atom_site_fract_y
   _atom_site_fract_z
Na      -0.000091933   0.000091933   0.138305600
Na      -0.000399361   0.000399361   0.638401990
Na       0.666404345   0.333595655   0.305534725
Na       0.666668863   0.333331137   0.805088160
Na       0.335194043   0.664805957   0.472872145
Na       0.334747440   0.665252560   0.968835282
Mg       0.126856397   0.063121775   0.322854732
Mg       0.126318551   0.063526352   0.823236099
Mg       0.936882400   0.063117558   0.323293479
Mg       0.936518777   0.063481182   0.823318120
Mg       0.936878267   0.873143603   0.322854732
Mg       0.936473690   0.873681449   0.823236099
Mg       0.793264331   0.396417034   0.490071464
Mg       0.793346919   0.396618210   0.989798681
Mg       0.603488775   0.396511183   0.490259010
Mg       0.603300255   0.396699703   0.990095977
Mg       0.603583008   0.206735669   0.490071464
Mg       0.603381832   0.206653081   0.989798681
Mg       0.460582317   0.730497115   0.156729173
Mg       0.460021429   0.729928767   0.656714743
Al       0.268586914   0.731413044   0.158042550
Mg       0.270086802   0.729913156   0.656086932
Mg       0.269502927   0.539417683   0.156729173
Mg       0.270071275   0.539978571   0.656714743
Al       0.298892546   0.261795823   0.316657265
Al       0.298357923   0.261855349   0.816590024
Al       0.738564560   0.036921666   0.316366460
Al       0.738249292   0.036969253   0.816239022
Al       0.962729363   0.701032895   0.316125616
Al       0.962931730   0.701868310   0.815846196
Al       0.738204309   0.701107513   0.316657267
Al       0.738144783   0.701642136   0.816590026
Al       0.963078261   0.261435308   0.316366462
Al       0.963030674   0.261750576   0.816239024
Al       0.298967046   0.037270710   0.316125618
Al       0.298131631   0.037068343   0.815846198
Al       0.965164079   0.594635004   0.483052452
Al       0.963935713   0.594922033   0.981856885
Al       0.405091128   0.369861930   0.483615026
Al       0.404803503   0.370345318   0.983162226
Al       0.630287055   0.034933933   0.483380533
Al       0.628493189   0.033356551   0.982351705
Al       0.405365128   0.034835980   0.483052454
Al       0.405078098   0.036064346   0.981856887
Al       0.630137997   0.594908740   0.483615028
Al       0.629654609   0.595196365   0.983162227
Al       0.965066009   0.369713018   0.483380535
Al       0.966643390   0.371506884   0.982351707
Al       0.631765547   0.927590120   0.150003514
Al       0.631782556   0.928356510   0.649934532
Al       0.068948943   0.701657484   0.149204224
Al       0.071564161   0.703433405   0.649659875
Al       0.297069091   0.368415003   0.150322034
Al       0.296547169   0.368018563   0.650004430
Al       0.072410012   0.368234511   0.150003515
Al       0.071643622   0.368217503   0.649934534
Al       0.298342443   0.931050925   0.149204226
Al       0.296566522   0.928435707   0.649659877
Al       0.631584938   0.702930982   0.150322035
Al       0.631981379   0.703452904   0.650004431
Si       0.192219152   0.190856780   0.008475247
Si       0.192779042   0.190523187   0.507948939
Si       0.808634581   0.002204191   0.008380769
Si       0.809423521   0.001796069   0.508092786
Si       0.998045907   0.807804772   0.007993247
Si       0.998365648   0.807199043   0.507471916
Si       0.809143741   0.807781422   0.008475400
Si       0.809477335   0.807221532   0.507949092
Si       0.997795862   0.191364898   0.008380922
Si       0.998203984   0.190575957   0.508092939
Si       0.192194654   0.001954041   0.007993400
Si       0.192800383   0.001634299   0.507472069
Si       0.859093591   0.523592290   0.174698059
Si       0.859275264   0.524067607   0.674840358
Si       0.475991807   0.335084613   0.175042045
Si       0.475976275   0.335164695   0.675167441
Si       0.664631995   0.140052162   0.174475672
Si       0.664791053   0.140802201   0.674919761
Si       0.476408232   0.140906983   0.174698212
Si       0.475932915   0.140725310   0.674840510
Si       0.664915440   0.524007671   0.175042198
Si       0.664835358   0.524023203   0.675167593
Si       0.859947264   0.335367952   0.174475824
Si       0.859197225   0.335208894   0.674919914
Si       0.526781496   0.857338958   0.341609110
Si       0.525186084   0.857006440   0.841541387
Si       0.143617823   0.668562658   0.341703782
Si       0.142480333   0.668832600   0.841559618
Si       0.331650411   0.474002063   0.342224265
Si       0.331410848   0.474200879   0.841763344
Si       0.142661563   0.473219078   0.341609263
Si       0.142994082   0.474814490   0.841541540
Si       0.331437395   0.856381655   0.341703935
Si       0.331167452   0.857519145   0.841559771
Si       0.525997363   0.668349536   0.342224418
Si       0.525798547   0.668589099   0.841763496
B        0.110547418   0.220459294   0.237210320
B        0.110171443   0.220556502   0.737386187
B        0.779540706   0.889453065   0.237210320
B        0.779443498   0.889829040   0.737386187
B        0.110767984   0.889231532   0.235937703
B        0.110023981   0.889975535   0.736974372
B        0.777055724   0.553541974   0.403729927
B        0.776457038   0.553733274   0.903853375
B        0.446458026   0.222944760   0.403729927
B        0.446266726   0.223543446   0.903853375
B        0.776864540   0.223134976   0.403539965
B        0.776992665   0.223006851   0.904256437
B        0.440349176   0.886236986   0.071973982
B        0.443612554   0.886809677   0.570262063
B        0.113763014   0.559651308   0.071973982
B        0.113190323   0.556387930   0.570262063
B        0.443069075   0.556930441   0.071083659
B        0.443773139   0.556226377   0.571052318
O        0.000497233  -0.000497233   0.396237810
O       -0.000182454   0.000182454   0.897202843
O        0.666882128   0.333117872   0.063998712
O        0.666829328   0.333170672   0.563674188
O        0.326964496   0.673035504   0.227256592
O        0.333190293   0.666809707   0.730131489
O        0.062295223   0.124074901   0.249037674
O        0.061831888   0.124183724   0.749424877
O        0.875925099   0.937704731   0.249037674
O        0.875816276   0.938168065   0.749424877
O        0.062752924   0.937247122   0.248494274
O        0.061860374   0.938139672   0.749271345
O        0.728876260   0.457268223   0.415942883
O        0.728655410   0.457418056   0.916279296
O        0.542731777   0.271123694   0.415942883
O        0.542581944   0.271344544   0.916279296
O        0.728684668   0.271315378   0.415501502
O        0.728812637   0.271187409   0.916881263
O        0.385292581   0.788612560   0.088664884
O        0.395402658   0.790389769   0.582075382
O        0.211387440   0.614707373   0.088664884
O        0.209610231   0.604597296   0.582075382
O        0.394512892   0.605487153   0.084162138
O        0.395584017   0.604416029   0.583252722
O        0.270730132   0.134705978   0.265660206
O        0.270284972   0.135349642   0.766539837
O        0.864773925   0.135226194   0.265963224
O        0.864701133   0.135298986   0.766470965
O        0.865293903   0.729269868   0.265660206
O        0.864650240   0.729715028   0.766539837
O        0.937463858   0.468603908   0.433079485
O        0.937662595   0.469314423   0.932767033
O        0.531518140   0.468481980   0.433501068
O        0.531217673   0.468782446   0.933458015
O        0.531395973   0.062536142   0.433079485
O        0.530685458   0.062337405   0.932767033
O        0.602676319   0.800970542   0.100057161
O        0.603822109   0.801892977   0.600206944
O        0.204499303   0.795500817   0.098286600
O        0.198108764   0.801891355   0.600070140
O        0.199029339   0.397323681   0.100057161
O        0.198106904   0.396177891   0.600206944
O        0.091118867   0.183461133   0.043218500
O        0.091817389   0.183140138   0.542438023
O        0.816538867   0.908880571   0.043218500
O        0.816859862   0.908182050   0.542438023
O        0.092498091   0.907502470   0.043551320
O        0.091939545   0.908061016   0.541981245
O        0.760177257   0.519745683   0.209735489
O        0.758611375   0.517004925   0.709845647
O        0.480254317   0.239822183   0.209735489
O        0.482995075   0.241388064   0.709845647
O        0.759996751   0.240003810   0.207312047
O        0.758336871   0.241663690   0.709771341
O        0.425105770   0.849522884   0.374557013
O        0.424114796   0.849275090   0.877306693
O        0.150477116   0.574893669   0.374557013
O        0.150724910   0.575884643   0.877306693
O        0.424700309   0.575300252   0.376813871
O        0.424929268   0.575071293   0.876907230
O        0.186542936   0.093359659   0.054018676
O        0.187323681   0.093201276   0.553092978
O        0.905145825   0.094854598   0.054201546
O        0.906593291   0.093407133   0.553724536
O        0.906639917   0.813457064   0.054018676
O        0.906798300   0.812676319   0.553092978
O        0.851554064   0.425496983   0.220298401
O        0.853768087   0.426931040   0.720521105
O        0.574776865   0.425223559   0.220421655
O        0.573297398   0.426703026   0.720744009
O        0.574502593   0.148445936   0.220298401
O        0.573068536   0.146231913   0.720521105
O        0.520373440   0.760110281   0.387446165
O        0.519132979   0.759701513   0.887683388
O        0.240644627   0.759355797   0.387566553
O        0.239220042   0.760780382   0.888113856
O        0.239889295   0.479626560   0.387446165
O        0.240298063   0.480867021   0.887683388
O        0.199253724   0.189227950   0.397276928
O        0.198726193   0.189737291   0.897934159
O        0.810555859   0.009307313   0.397405794
O        0.810024133   0.009455618   0.897848089
O        0.991468019   0.800842452   0.396682314
O        0.990619810   0.801310668   0.897562417
O        0.810771962   0.800746201   0.397276851
O        0.810262620   0.801273731   0.897934082
O        0.990692700   0.189444229   0.397405716
O        0.990544395   0.189975956   0.897848011
O        0.199157623   0.008531968   0.396682237
O        0.198689408   0.009380177   0.897562340
O        0.865608895   0.523258138   0.064147016
O        0.865680696   0.522887757   0.564202318
O        0.476967952   0.343089339   0.064543576
O        0.477164013   0.342328170   0.564503956
O        0.654617303   0.131541818   0.064135958
O        0.657603454   0.134534045   0.564259047
O        0.476741773   0.134391029   0.064146938
O        0.477112155   0.134319227   0.564202240
O        0.656910674   0.523032137   0.064543499
O        0.657671843   0.522836076   0.564503879
O        0.868458259   0.345382684   0.064135881
O        0.865466031   0.342396533   0.564258970
O        0.531189352   0.855371017   0.230687989
O        0.531460862   0.856155878   0.731031423
O        0.150788821   0.679936476   0.229394932
O        0.143879233   0.675982124   0.731046249
O        0.324248451   0.469112947   0.231401995
O        0.323891130   0.467812508   0.731271012
O        0.144628894   0.468810572   0.230687911
O        0.143844033   0.468539062   0.731031345
O        0.320063537   0.849211268   0.229394854
O        0.324017889   0.856120856   0.731046172
O        0.530887129   0.675751536   0.231401917
O        0.532187568   0.676108857   0.731270934
O        0.284388537   0.286598788   0.050571125
O        0.284629946   0.286275770   0.550069863
O        0.711580404  -0.003243274   0.049909603
O        0.713620169  -0.001963689   0.549993411
O        1.002379018   0.715890759   0.049962374
O        1.002335663   0.715159812   0.549072417
O        0.713400951   0.715611215   0.050571229
O        0.713723969   0.715369806   0.550069967
O        1.003243287   0.288419857   0.049909708
O        1.001963701   0.286380092   0.549993515
O        0.284109490  -0.002379031   0.049962478
O        0.284840437  -0.002335675   0.549072521
O        0.952955265   0.618537250   0.216757741
O        0.951459795   0.619942775   0.716552874
O        0.380973647   0.332814450   0.217258819
O        0.380265887   0.331639066   0.717027879
O        0.666938738   0.047334379   0.216610891
O        0.668312335   0.048638026   0.716779799
O        0.381462489   0.047044486   0.216757846
O        0.380056964   0.048539956   0.716552979
O        0.667185562   0.619026614   0.217258924
O        0.668360946   0.619734374   0.717027984
O        0.952665870   0.333061250   0.216610996
O        0.951362222   0.331687652   0.716779903
O        0.618189111   0.953058854   0.383248686
O        0.617249879   0.952750367   0.883295667
O        0.047505545   0.664518641   0.381089158
O        0.046707209   0.664898046   0.883577673
O        0.335374641   0.382011052   0.383587264
O        0.334757928   0.382126233   0.883916847
O        0.046940885   0.381810641   0.383248790
O        0.047249372   0.382749873   0.883295771
O        0.335481372   0.952494716   0.381089262
O        0.335101966   0.953293051   0.883577777
O        0.617989196   0.664625347   0.383587368
O        0.617874016   0.665242060   0.883916952
O        0.210869646   0.271800759   0.231807572
O        0.210422898   0.271466158   0.731743378
O        0.728264972   0.938547025   0.231495404
O        0.728209238   0.938858781   0.731818162
O        0.062158107   0.788777956   0.230138139
O        0.060879544   0.789671193   0.731275946
O        0.728199060   0.789129975   0.231807553
O        0.728533661   0.789576723   0.731743359
O        0.061452777   0.271735209   0.231495385
O        0.061141022   0.271790944   0.731818143
O        0.211222423   0.937842091   0.230138119
O        0.210329186   0.939120654   0.731275927
O        0.877541023   0.604518322   0.397664053
O        0.876837258   0.605019938   0.897993019
O        0.395257689   0.271962797   0.398205188
O        0.395220565   0.272660103   0.898399840
O        0.727627626   0.122845657   0.397810444
O        0.727470113   0.122705090   0.898472190
O        0.395481497   0.122458598   0.397664034
O        0.394979881   0.123162363   0.897992999
O        0.728037004   0.604742492   0.398205169
O        0.727339699   0.604779616   0.898399821
O        0.877154722   0.272372572   0.397810425
O        0.877295290   0.272530085   0.898472171
O        0.539366391   0.931612644   0.063353418
O        0.543822173   0.937976534   0.564702189
O        0.060570176   0.605539414   0.065860470
O        0.062332570   0.605807405   0.564257877
O        0.393802906   0.456966041   0.065067677
O        0.394442816   0.456032255   0.565177434
O        0.068387175   0.460633229   0.063353399
O        0.062023285   0.456177448   0.564702170
O        0.394460388   0.939430005   0.065860451
O        0.394192397   0.937667611   0.564257858
O        0.543034338   0.606197292   0.065067657
O        0.543968125   0.605557383   0.565177414
H        0.000652258  -0.000652258   0.462111223
H       -0.000795834   0.000795834   0.963046503
H        0.666720172   0.333279828   0.129869087
H        0.666734427   0.333265573   0.629537513
H        0.324619988   0.675380012   0.293186202
H        0.333160457   0.666839543   0.795958430
H        0.269296213   0.134607580   0.198864188
H        0.269245338   0.135104149   0.699745414
H        0.865571839   0.134428138   0.199157444
H        0.865284223   0.134715753   0.699673289
H        0.865392444   0.730703787   0.198864188
H        0.864895875   0.730754662   0.699745414
H        0.935538972   0.467394990   0.366331013
H        0.936449709   0.468607518   0.865944604
H        0.532100034   0.467899942   0.366740446
H        0.531757184   0.468242793   0.866655458
H        0.532605034   0.064461028   0.366331013
H        0.531392506   0.063550291   0.865944604
H        0.603408415   0.801103643   0.033253490
H        0.603215413   0.801645169   0.533434589
H        0.205774982   0.794224995   0.031200936
H        0.198238914   0.801761062   0.533335595
H        0.198896381   0.396591585   0.033253490
H        0.198354854   0.396784587   0.533434589
