# Supplementary material for: Theoretical OH stretching vibrations in dravite
Source: Copernicus journal article supplement (doi:10.5194/ejm-34-239-2022), 2022-04-13
Supplement: Supplementary file 3 [file ejm-34-239-2022-supplement.zip › ejm-2021-65-supplement-version2/supplementary_files/Structure_and_eigendisplacement_files/chemically_disordered_models_1x1x2_hexagonal_supercell/dravite_112_Al_Mg.cif]

#======================================================================

# CRYSTAL DATA

#----------------------------------------------------------------------

data_VESTA_phase_1


_pd_phase_name                         
_cell_length_a 16.1067867
_cell_length_b 16.1067867
_cell_length_c 14.55806160
_cell_angle_alpha                      90
_cell_angle_beta                       90
_cell_angle_gamma                      120
_symmetry_space_group_name_H-M         'P1'
_symmetry_Int_Tables_number            1

loop_
_symmetry_equiv_pos_as_xyz
   'x, y, z'

loop_
   _atom_site_label
   _atom_site_fract_x
   _atom_site_fract_y
   _atom_site_fract_z
Na       0.001083563  -0.001020353   0.138196396
Na       0.000091097   0.000712278   0.638039920
Na       0.668984469   0.336243905   0.304850307
Na       0.667368221   0.333500241   0.805523035
Na       0.333515535   0.665361482   0.472545305
Na       0.333855712   0.666647660   0.970043601
Mg       0.126711035   0.063794877   0.323509001
Mg       0.126156616   0.062926104   0.823418391
Mg       0.936739606   0.063193379   0.322953233
Mg       0.936337449   0.063422932   0.823328618
Mg       0.937583967   0.873461580   0.322938379
Mg       0.935898405   0.873548234   0.821324564
Mg       0.793672795   0.396792515   0.489933173
Mg       0.793836425   0.397363099   0.990166191
Mg       0.603698288   0.396654321   0.489970950
Mg       0.603150672   0.396533906   0.990090649
Mg       0.603616181   0.206913825   0.489594964
Mg       0.603470670   0.206974934   0.990336369
Mg       0.461003739   0.730474195   0.156731922
Mg       0.459841245   0.729898758   0.656624179
Al       0.268425591   0.730768218   0.159042820
Mg       0.270133843   0.729977392   0.656428886
Mg       0.269455058   0.539940975   0.156380218
Mg       0.270082082   0.539916641   0.656732136
Al       0.298561708   0.261535412   0.316475480
Al       0.298168559   0.261416689   0.816492067
Al       0.738545493   0.037015598   0.316225619
Al       0.738002286   0.037134680   0.816116523
Al       0.964085067   0.701650566   0.316917009
Al       0.962580270   0.701679988   0.815132224
Al       0.739068210   0.701665527   0.316639231
Al       0.737907074   0.701487037   0.815988776
Al       0.963335966   0.261927622   0.316216614
Al       0.963009086   0.261747312   0.816459244
Al       0.298500696   0.036515541   0.315920838
Al       0.298318837   0.036844469   0.816096222
Al       0.965901434   0.595183483   0.483167158
Al       0.964241581   0.596145849   0.982446867
Al       0.405253876   0.369923961   0.483205750
Al       0.404502206   0.369885350   0.983074965
Al       0.630319781   0.035086102   0.483156703
Al       0.628394935   0.033539815   0.982543320
Al       0.405157449   0.034961442   0.483021740
Al       0.405145262   0.036141642   0.982914031
Al       0.630251624   0.595095732   0.483153853
Al       0.629762272   0.595110649   0.982840388
Al       0.965213354   0.370084874   0.483132490
Al       0.966639640   0.372085779   0.982335447
Al       0.631928628   0.927815355   0.149938317
Al       0.631551389   0.928427659   0.649780465
Mg       0.070395140   0.702945937   0.148746432
Al       0.071876073   0.703658083   0.649621376
Al       0.296444467   0.368092191   0.150083611
Al       0.296548194   0.367999700   0.649851960
Al       0.072367956   0.369029845   0.149838511
Al       0.071580527   0.368070982   0.649774144
Al       0.297820906   0.929249097   0.149675976
Al       0.296553433   0.928327064   0.649662783
Al       0.632226710   0.703087732   0.150091751
Al       0.631638889   0.703382152   0.649622997
Si       0.191809569   0.189755264   0.008449303
Si       0.192748140   0.190630733   0.508219305
Si       0.808226314   0.002613731   0.008048514
Si       0.809388290   0.001987213   0.508111226
Si       0.996455113   0.806558367   0.004899249
Si       0.997691923   0.807273106   0.509121910
Si       0.808737337   0.808592335   0.007157449
Si       0.809412051   0.807489451   0.508449846
Si       0.997875372   0.191141723   0.008358565
Si       0.998215858   0.190697931   0.507983822
Si       0.191978099   0.000416456   0.007887994
Si       0.192551290   0.001614182   0.508083565
Si       0.857481539   0.522820965   0.176373699
Si       0.859385639   0.524028470   0.674813050
Si       0.474787240   0.334660080   0.174872478
Si       0.475908575   0.335156354   0.675008301
Si       0.664394384   0.139937933   0.174617853
Si       0.664777184   0.140984843   0.674786021
Si       0.476362451   0.141228671   0.174982049
Si       0.475935427   0.140785189   0.674785071
Si       0.663092179   0.523117871   0.174974934
Si       0.664654237   0.523946034   0.674968820
Si       0.859638975   0.335016538   0.174492914
Si       0.859298344   0.335302201   0.674916554
Si       0.527095534   0.857413172   0.341898493
Si       0.525139740   0.856952568   0.841544098
Si       0.145996881   0.668713764   0.343594636
Si       0.141850016   0.668797500   0.841416945
Si       0.331860547   0.473890979   0.341858504
Si       0.331139982   0.473897584   0.841711406
Si       0.143081972   0.473498025   0.342481109
Si       0.142743164   0.474581776   0.841301716
Si       0.331937748   0.856227910   0.343585500
Si       0.331092844   0.857372346   0.841709794
Si       0.526174001   0.668311170   0.341867117
Si       0.525490475   0.668353384   0.841545645
B        0.110131337   0.220714075   0.237316119
B        0.110054617   0.220347165   0.737334187
B        0.779718846   0.889700711   0.237038624
B        0.779031914   0.889868642   0.736748644
B        0.110223654   0.889898694   0.240344959
B        0.110076900   0.890133216   0.736272778
B        0.777956416   0.554575424   0.405352099
B        0.776046843   0.553290231   0.902717789
B        0.446565607   0.222974738   0.403451561
B        0.446342216   0.223379278   0.903682696
B        0.776957034   0.223334859   0.403427606
B        0.776909702   0.223031864   0.904276807
B        0.441370736   0.886846456   0.072783568
B        0.443646733   0.887006607   0.570329375
B        0.114681399   0.559591022   0.067505775
B        0.113289528   0.556409570   0.570582504
B        0.443251824   0.556770307   0.070741223
B        0.443593769   0.556319844   0.570591972
O        0.000068755   0.000459428   0.397045269
O       -0.000876914  -0.000225048   0.896423993
O        0.666548056   0.333032672   0.063942811
O        0.666815415   0.333098414   0.563601454
O        0.330027460   0.673034987   0.226833789
O        0.333469130   0.666683969   0.730312193
O        0.062008066   0.124435301   0.249259637
O        0.061812661   0.124015884   0.749519004
O        0.876024816   0.937846905   0.248937783
O        0.875443236   0.938458661   0.748412754
O        0.063782512   0.940651667   0.249305513
O        0.062268497   0.938770511   0.748037246
O        0.729402147   0.457989886   0.416716024
O        0.727803976   0.456996623   0.916025181
O        0.542939349   0.271366297   0.415561202
O        0.542654266   0.271362845   0.916007150
O        0.728805188   0.271536206   0.415470266
O        0.728801189   0.271224416   0.917081148
O        0.386886247   0.789381337   0.089401941
O        0.395467733   0.790629158   0.582415445
O        0.212561611   0.613904365   0.087419140
O        0.209662406   0.604493188   0.582840128
O        0.394879133   0.605338085   0.083497729
O        0.395350985   0.604457097   0.582847273
O        0.270712710   0.135069696   0.266239119
O        0.270380808   0.135264897   0.766321179
O        0.864750455   0.135334813   0.266009029
O        0.864593797   0.135292362   0.766210308
O        0.864000914   0.729718028   0.266958910
O        0.863565183   0.729549161   0.764909930
O        0.937441631   0.468394132   0.433037852
O        0.935519907   0.467352587   0.931564412
O        0.531559916   0.468395776   0.433160205
O        0.530779446   0.468344847   0.933165004
O        0.531636209   0.062797313   0.433069528
O        0.530787089   0.062564542   0.933037296
O        0.603215222   0.801164506   0.100018383
O        0.603482980   0.801948985   0.599884154
O        0.214321529   0.800602641   0.097684836
O        0.198787604   0.802211277   0.599712290
O        0.199172331   0.397044890   0.100223424
O        0.198237010   0.396100249   0.599919995
O        0.091224465   0.183331939   0.043101646
O        0.091806209   0.183336115   0.542698713
O        0.812847823   0.907834003   0.042519800
O        0.816467337   0.908389030   0.542960760
O        0.092962904   0.904800114   0.041324167
O        0.091771197   0.908354580   0.543199256
O        0.754414413   0.512524987   0.209229362
O        0.758323968   0.516661273   0.709281634
O        0.480772482   0.240549238   0.210153655
O        0.482947488   0.241439331   0.709705136
O        0.760332720   0.238865766   0.207587546
O        0.758370274   0.241700454   0.709671995
O        0.426587737   0.850685988   0.376592566
O        0.424085697   0.849056163   0.877317786
O        0.151611294   0.574290026   0.379018085
O        0.150834763   0.575846077   0.876015979
O        0.424882651   0.575233449   0.376512703
O        0.424685799   0.574799926   0.876595432
O        0.184892201   0.091515296   0.053574941
O        0.187344458   0.093499445   0.553644778
O        0.905386410   0.094220969   0.053835509
O        0.906640139   0.093553832   0.553731524
O        0.908829489   0.819775744   0.050681097
O        0.906199038   0.812979538   0.555238388
O        0.849258115   0.423292808   0.220599046
O        0.853624994   0.426776716   0.720778748
O        0.570901249   0.426590371   0.220935291
O        0.573102930   0.426689782   0.720646877
O        0.574617344   0.148813445   0.220412456
O        0.573183732   0.146541600   0.720448794
O        0.520954961   0.760141124   0.387439886
O        0.519280942   0.759676103   0.887441489
O        0.242475882   0.759729369   0.391896937
O        0.239225007   0.760507372   0.887796888
O        0.239997649   0.478454548   0.387839925
O        0.239906267   0.480242118   0.887441995
O        0.199157209   0.189689869   0.397610686
O        0.198674033   0.189151138   0.897832792
O        0.810609660   0.009615795   0.397485538
O        0.809886822   0.009971518   0.897488614
O        0.989023929   0.800802228   0.399049084
O        0.989765094   0.802607646   0.894032185
O        0.810506488   0.801638095   0.397854361
O        0.809002098   0.801585432   0.896537414
O        0.990671636   0.189601152   0.397390498
O        0.990643345   0.189816285   0.897719501
O        0.199218287   0.009063869   0.397459300
O        0.199172063   0.009479562   0.897379292
O        0.865598379   0.521999770   0.065541945
O        0.866123995   0.522290040   0.564409780
O        0.476265133   0.342093222   0.064283954
O        0.477187530   0.342364155   0.564360098
O        0.654369125   0.131678361   0.064274793
O        0.657567766   0.134695763   0.564162476
O        0.476906477   0.135566370   0.064304160
O        0.477219087   0.134542335   0.564161388
O        0.655721048   0.522462408   0.064364700
O        0.657191333   0.522749365   0.564388336
O        0.868176427   0.344464588   0.064147901
O        0.865516248   0.342304500   0.564279277
O        0.531879498   0.855461176   0.231065101
O        0.531375549   0.856175989   0.730986775
O        0.158262540   0.678499436   0.233279138
O        0.144559083   0.676680191   0.730763142
O        0.324534003   0.469115988   0.231096627
O        0.323944721   0.467659324   0.731143105
O        0.145035381   0.469015244   0.231569940
O        0.143951301   0.467944614   0.730813632
O        0.322300928   0.850170169   0.231669804
O        0.324527441   0.856465814   0.731136726
O        0.531317940   0.675547756   0.231098763
O        0.531855457   0.675946746   0.731000747
O        0.283992456   0.285776910   0.050366111
O        0.284762441   0.286391607   0.550098083
O        0.711927675  -0.001814706   0.049943072
O        0.713700274  -0.001570808   0.550094680
O        0.993130304   0.711753597   0.044119930
O        1.002554021   0.715486673   0.550015859
O        0.714072631   0.715532661   0.050048700
O        0.713446229   0.715392748   0.550112898
O        1.002832842   0.287680754   0.050028017
O        1.001889057   0.286359178   0.550036851
O        0.284873233  -0.001917180   0.050079003
O        0.284861327  -0.001944801   0.549658461
O        0.945786839   0.615373394   0.223291346
O        0.951406964   0.620083259   0.715853862
O        0.379263952   0.331443674   0.216590454
O        0.380184696   0.331562579   0.716873304
O        0.666403655   0.047061941   0.216813654
O        0.668053011   0.048728173   0.716674733
O        0.381735378   0.047471491   0.217087087
O        0.380307469   0.048607771   0.716679882
O        0.668040100   0.619562944   0.216822376
O        0.667790491   0.619504177   0.716686854
O        0.952720868   0.333349983   0.216764656
O        0.951346998   0.331598514   0.716740994
O        0.618780478   0.953169822   0.383452505
O        0.617174911   0.952747392   0.883211371
O        0.049083765   0.664100681   0.382815883
O        0.045681883   0.665004417   0.880972453
O        0.335832807   0.381995770   0.383250046
O        0.334483875   0.381756799   0.883736871
O        0.047020676   0.381623078   0.383494294
O        0.047077179   0.382378653   0.882923435
O        0.335663014   0.952645604   0.382338399
O        0.335380453   0.953210457   0.883942235
O        0.618075983   0.664545298   0.383348857
O        0.617481983   0.664923818   0.883547166
O        0.210374577   0.271933475   0.232045186
O        0.210338766   0.271330325   0.731626593
O        0.728673410   0.939098451   0.231271855
O        0.727773057   0.938894129   0.731643731
O        0.062007519   0.791588832   0.240341242
O        0.060869169   0.790043387   0.730109282
O        0.728056759   0.789458112   0.231830728
O        0.728048823   0.789644955   0.731008321
O        0.061198015   0.272028792   0.231467777
O        0.060977570   0.271486939   0.731592091
O        0.211532375   0.938848958   0.230987376
O        0.210552668   0.939055583   0.731357679
O        0.878054157   0.606092436   0.401273350
O        0.875707879   0.603690514   0.895323860
O        0.395285227   0.271952801   0.398096038
O        0.395163033   0.272416452   0.898061170
O        0.727638322   0.123022883   0.397773772
O        0.727049070   0.122670248   0.898232198
O        0.395565336   0.122572051   0.397712497
O        0.395260732   0.123094713   0.897885591
O        0.728115574   0.605076245   0.398663947
O        0.726875769   0.604568915   0.897837578
O        0.877179396   0.272376286   0.397880993
O        0.877088016   0.271999146   0.898316909
O        0.540497690   0.931808693   0.063359585
O        0.543898330   0.938138621   0.564680778
O        0.063275291   0.604373948   0.054373364
O        0.062460586   0.605727769   0.564947818
O        0.393896251   0.456613428   0.064860749
O        0.394457465   0.456098850   0.564917861
O        0.069042392   0.459273479   0.062894779
O        0.062074881   0.456118300   0.564871862
O        0.397368834   0.941697805   0.067043068
O        0.394493675   0.938075799   0.564542732
O        0.543315991   0.606162377   0.064775115
O        0.543761997   0.605671429   0.564723398
H       -0.001101370  -0.000385186   0.462886742
H       -0.002926093  -0.004517900   0.962166961
H        0.669703604   0.337113235   0.129682730
H        0.666692679   0.333187870   0.629460680
H        0.323369294   0.672350316   0.292512956
H        0.332509421   0.666477481   0.796138737
H        0.268610062   0.134107093   0.199473393
H        0.269038392   0.134722302   0.699538368
H        0.865506611   0.134771763   0.199211616
H        0.865430337   0.134829125   0.699428594
H        0.864550254   0.728631795   0.200245641
H        0.863552065   0.730631880   0.698120622
H        0.936466099   0.468364894   0.366248664
H        0.933100159   0.466063688   0.864816795
H        0.532267396   0.467537581   0.366364329
H        0.531375348   0.467608044   0.866384194
H        0.532390145   0.064327200   0.366305843
H        0.531264611   0.063885920   0.866246751
H        0.603866044   0.801379527   0.033234924
H        0.602503901   0.801480335   0.533104423
H        0.215331195   0.798264606   0.030829265
H        0.199503346   0.801478895   0.532932311
H        0.198654735   0.396608617   0.033430648
H        0.198806746   0.397180828   0.533137436
