# Supplementary material for: Theoretical OH stretching vibrations in dravite
Source: Copernicus journal article supplement (doi:10.5194/ejm-34-239-2022), 2022-04-13
Supplement: Supplementary file 3 [file ejm-34-239-2022-supplement.zip › ejm-2021-65-supplement-version2/supplementary_files/Structure_and_eigendisplacement_files/chemically_disordered_models_1x1x2_hexagonal_supercell/dravite_112_Al_Mg_vacancy_conf1.cif]

#======================================================================

# CRYSTAL DATA

#----------------------------------------------------------------------

data_VESTA_phase_1


_pd_phase_name                         
_cell_length_a 16.1067867
_cell_length_b 16.1067867
_cell_length_c 14.55806160
_cell_angle_alpha                      90
_cell_angle_beta                       90
_cell_angle_gamma                      120
_symmetry_space_group_name_H-M         'P1'
_symmetry_Int_Tables_number            1

loop_
_symmetry_equiv_pos_as_xyz
   'x, y, z'

loop_
   _atom_site_label
   _atom_site_fract_x
   _atom_site_fract_y
   _atom_site_fract_z
Na       0.001086386  -0.000855283   0.138292444
Na       0.000131765   0.000775622   0.637734990
Na       0.668858275   0.336098047   0.304525702
Na       0.667402648   0.333539393   0.805154907
Na       0.333466562   0.666688510   0.970986227
Mg       0.126807204   0.063860807   0.323436799
Mg       0.126228514   0.062941297   0.823311390
Mg       0.936588132   0.063220949   0.322879522
Mg       0.936286314   0.063466619   0.823206905
Mg       0.937482343   0.873277076   0.322768706
Mg       0.935849265   0.873438782   0.821145130
Mg       0.793539634   0.396708523   0.489557648
Mg       0.794137062   0.397516649   0.989813969
Mg       0.603797600   0.396621528   0.489642234
Mg       0.603041498   0.396655563   0.989704864
Mg       0.603650710   0.207034570   0.489289373
Mg       0.603356648   0.206787516   0.990068387
Mg       0.460476617   0.730164602   0.159030766
Mg       0.458077862   0.728991585   0.652348620
Al       0.268757707   0.730651599   0.162291815
Mg       0.270858430   0.729030288   0.652292890
Mg       0.269878579   0.540575009   0.159200248
Mg       0.270930717   0.541614351   0.652308545
Al       0.298672896   0.261979005   0.316829913
Al       0.298140294   0.261690014   0.816140217
Al       0.738027773   0.036694207   0.316577941
Al       0.737723738   0.036876433   0.815810255
Al       0.964497677   0.701494016   0.317261183
Al       0.962868815   0.701667794   0.814802076
Al       0.738667342   0.701544072   0.316906190
Al       0.737641489   0.701513642   0.815614658
Al       0.963622453   0.262345704   0.316589780
Al       0.963282513   0.262030555   0.816139320
Al       0.298623302   0.036266089   0.316318238
Al       0.298305821   0.036557178   0.815807576
Al       0.965536236   0.594949578   0.483150252
Al       0.965014375   0.596471498   0.982343883
Al       0.405480254   0.369871103   0.483174416
Al       0.404200637   0.370121859   0.982933224
Al       0.630324254   0.035352402   0.483186778
Al       0.628128135   0.033026589   0.982468471
Al       0.405315347   0.035337192   0.483084736
Al       0.404796424   0.035552722   0.982927887
Al       0.630362826   0.594901932   0.483110184
Al       0.629475403   0.595385733   0.982627330
Al       0.964919768   0.369995049   0.483123332
Al       0.967300673   0.372382818   0.982314522
Al       0.631362963   0.927339826   0.150426427
Al       0.631111079   0.927973313   0.649044682
Mg       0.071053409   0.702914664   0.149362213
Al       0.072290964   0.703672377   0.648784617
Al       0.296458810   0.368622789   0.150554567
Al       0.296532703   0.368449678   0.649028133
Al       0.072952618   0.369601004   0.150422445
Al       0.072010511   0.368484085   0.648967015
Al       0.297740612   0.928606879   0.150338137
Al       0.296457962   0.927850652   0.648888437
Al       0.631689193   0.703058868   0.150485538
Al       0.631198884   0.703412922   0.648795510
Si       0.191940236   0.189913265   0.008364830
Si       0.192620263   0.190544424   0.508201997
Si       0.808082513   0.002592775   0.007994336
Si       0.809411783   0.001977236   0.508089913
Si       0.996497996   0.806432670   0.004845366
Si       0.997678314   0.807390167   0.509061772
Si       0.808551213   0.808461887   0.007047316
Si       0.809480234   0.807621198   0.508359270
Si       0.997961109   0.191317430   0.008296790
Si       0.998164325   0.190565554   0.507970073
Si       0.192087817   0.000354796   0.007849873
Si       0.192422764   0.001639807   0.508085488
Si       0.857633774   0.522913331   0.175995810
Si       0.859229447   0.524018945   0.674684547
Si       0.474663630   0.334692569   0.174609040
Si       0.475891255   0.335066187   0.674856372
Si       0.664372562   0.139887343   0.174374851
Si       0.664886688   0.141105898   0.674644269
Si       0.476226778   0.141131489   0.174768367
Si       0.475888895   0.140951678   0.674658116
Si       0.663031862   0.523194067   0.174589523
Si       0.664819981   0.523994717   0.674819384
Si       0.859786344   0.335051335   0.174227965
Si       0.859155344   0.335151277   0.674765372
Si       0.526716676   0.857190150   0.342964219
Si       0.525058634   0.856580602   0.840903885
Si       0.146165753   0.668624699   0.345334588
Si       0.142242991   0.669052900   0.840652899
Si       0.331867819   0.474018230   0.342987957
Si       0.330864979   0.473984416   0.840953846
Si       0.143241034   0.473691917   0.343725687
Si       0.143136810   0.474638182   0.840546071
Si       0.331606638   0.855962170   0.345191985
Si       0.330813722   0.857018051   0.841072699
Si       0.526072801   0.668269418   0.342867883
Si       0.525384499   0.668641144   0.840807156
B        0.110080330   0.220649072   0.237269845
B        0.109992290   0.220245623   0.736985780
B        0.779692959   0.889715167   0.236952264
B        0.779149869   0.889947230   0.736348657
B        0.110170237   0.889948042   0.240292756
B        0.110015375   0.890160448   0.735920233
B        0.777822097   0.554315396   0.405013995
B        0.776223640   0.553547664   0.902681132
B        0.446783962   0.223126633   0.403227578
B        0.446098967   0.223248255   0.903666478
B        0.776809807   0.223403744   0.403188185
B        0.777035434   0.222955954   0.904247172
B        0.441162087   0.886407631   0.073581722
B        0.444328575   0.888541899   0.571506944
B        0.115286861   0.559858123   0.068514834
B        0.111819939   0.555696721   0.571528668
B        0.443011413   0.556956565   0.071207015
B        0.444263750   0.555665478   0.571453754
O       -0.000020322   0.000406074   0.396868832
O       -0.000914469  -0.000282108   0.896441769
O        0.666598315   0.333108733   0.063559945
O        0.666825938   0.333120913   0.563254347
O        0.330302047   0.673115616   0.230728098
O        0.333431651   0.666624201   0.729781525
O        0.061902374   0.124294301   0.249140896
O        0.061741116   0.123865820   0.749537246
O        0.876072500   0.937911454   0.248767301
O        0.875606970   0.938556974   0.748376593
O        0.063712986   0.940758683   0.249127898
O        0.062166862   0.938805755   0.748018853
O        0.729240318   0.457649424   0.415935010
O        0.727926696   0.457162599   0.915895355
O        0.543227563   0.271526662   0.414945693
O        0.542501706   0.271279132   0.915905139
O        0.728629401   0.271648968   0.414826840
O        0.728877321   0.271185586   0.916993170
O        0.386852866   0.789149387   0.090995940
O        0.397125345   0.794179671   0.585963373
O        0.212893014   0.613973795   0.089479413
O        0.206192704   0.602795528   0.586038138
O        0.394696174   0.605429557   0.084615898
O        0.397030549   0.602808003   0.585986298
O        0.270789781   0.135129291   0.266446988
O        0.270252262   0.135205669   0.766359877
O        0.864639215   0.135336515   0.266226063
O        0.864636800   0.135251371   0.766237774
O        0.863891578   0.729637537   0.267112644
O        0.863631432   0.729663543   0.764883528
O        0.936497585   0.467856188   0.433189508
O        0.936002048   0.467566220   0.931478718
O        0.532198803   0.467836966   0.433246461
O        0.530677123   0.468413347   0.932913198
O        0.532050528   0.063723667   0.433275536
O        0.530653576   0.062370468   0.932982804
O        0.602793183   0.800988230   0.100343607
O        0.603676570   0.802071538   0.598390423
O        0.214479466   0.800280905   0.098606886
O        0.198633059   0.802284947   0.598230719
O        0.199434890   0.397511147   0.100658520
O        0.198103165   0.395859865   0.598411393
O        0.091048009   0.182924598   0.042970381
O        0.091732734   0.183258619   0.542691321
O        0.813252447   0.908037473   0.042374131
O        0.816421578   0.908398358   0.542935978
O        0.092690710   0.905050717   0.041239996
O        0.091713396   0.908401748   0.543170479
O        0.754319336   0.512310598   0.208293083
O        0.758147029   0.516326132   0.709833685
O        0.480744559   0.240574007   0.209651133
O        0.483306356   0.241673477   0.710192760
O        0.760305333   0.238950534   0.207036612
O        0.758165507   0.241871470   0.710148101
O        0.428050173   0.853997523   0.376555386
O        0.424223590   0.849330765   0.876615278
O        0.147541420   0.572194617   0.379379241
O        0.150686997   0.575735710   0.875152558
O        0.427008198   0.573147397   0.376277525
O        0.424768706   0.574705519   0.875768518
O        0.185503747   0.091819361   0.053387460
O        0.186647664   0.093184937   0.553681268
O        0.905224888   0.094432961   0.053640822
O        0.906924428   0.093173534   0.553745215
O        0.908472778   0.819107588   0.050521215
O        0.906568998   0.813805226   0.555120514
O        0.849223902   0.423291203   0.220116489
O        0.853807043   0.426860492   0.720548188
O        0.570982626   0.426520792   0.220473756
O        0.572989781   0.426854011   0.720392174
O        0.574745452   0.149140624   0.219954463
O        0.573036144   0.146316362   0.720182240
O        0.525226418   0.762236612   0.387212756
O        0.519108291   0.759579540   0.887739799
O        0.239608542   0.762344551   0.392692013
O        0.239350363   0.760338514   0.888022865
O        0.237827006   0.474041751   0.387795020
O        0.239994265   0.480381980   0.887678233
O        0.198947357   0.189463030   0.397588928
O        0.198658683   0.189260567   0.897740222
O        0.810715167   0.009618001   0.397459377
O        0.809756120   0.009878467   0.897424460
O        0.989003220   0.800952645   0.398984510
O        0.989851765   0.802572431   0.893970178
O        0.810720738   0.801834355   0.397767084
O        0.808894251   0.801603156   0.896411754
O        0.990528434   0.189292844   0.397376528
O        0.990770462   0.189952633   0.897650520
O        0.199018910   0.009171304   0.397460616
O        0.199142463   0.009287842   0.897320617
O        0.866052637   0.522148841   0.065180426
O        0.864939327   0.522069833   0.564252845
O        0.476169036   0.342278981   0.064011843
O        0.477372309   0.341512250   0.564191908
O        0.654218022   0.131470346   0.064028447
O        0.658474280   0.135800311   0.563993426
O        0.476754532   0.135321798   0.064083305
O        0.477326311   0.135731929   0.563999629
O        0.655492497   0.522550194   0.063980160
O        0.658239307   0.522652369   0.564210304
O        0.868458497   0.344611912   0.063869019
O        0.864388439   0.341354023   0.564106655
O        0.531944192   0.855820815   0.231665303
O        0.532400800   0.855824954   0.730759949
O        0.158038091   0.678423750   0.234570592
O        0.144794979   0.677824396   0.730392385
O        0.324678531   0.468900207   0.231747888
O        0.322702461   0.466732166   0.730782952
O        0.144746877   0.468810215   0.232346489
O        0.144295595   0.466937879   0.730468015
O        0.322160744   0.850282384   0.232721308
O        0.323180690   0.856190704   0.730909219
O        0.531528842   0.675425207   0.231624424
O        0.532823874   0.677253068   0.730663733
O        0.283877747   0.286026928   0.050335839
O        0.284781476   0.285732940   0.550172376
O        0.711713849  -0.002136173   0.049991922
O        0.714285439  -0.000882356   0.550169581
O        0.993769229   0.711962625   0.044163294
O        1.001744092   0.715444597   0.550143323
O        0.713763480   0.715644635   0.049959288
O        0.714105232   0.715373634   0.550144736
O        1.003273067   0.287959532   0.050041753
O        1.001158425   0.285669508   0.550130180
O        0.284685903  -0.002403952   0.050153248
O        0.284859711  -0.001206995   0.549781771
O        0.945641419   0.615486276   0.222958951
O        0.951091679   0.620051806   0.715829788
O        0.379199815   0.331306715   0.216402880
O        0.380171441   0.331286896   0.716836514
O        0.666505999   0.047212070   0.216652553
O        0.668325997   0.049034601   0.716674449
O        0.381699967   0.047558649   0.216975486
O        0.380301295   0.048946052   0.716700921
O        0.668198621   0.619588955   0.216544412
O        0.668097686   0.619534629   0.716632039
O        0.952593294   0.333160219   0.216607502
O        0.951031005   0.331305738   0.716725301
O        0.619074333   0.953874907   0.383462359
O        0.617025824   0.952563722   0.883081912
O        0.048115835   0.663786182   0.382898010
O        0.045949333   0.665051632   0.880796563
O        0.336010704   0.381390866   0.383254300
O        0.334435564   0.381907405   0.883517194
O        0.046240540   0.380994616   0.383526949
O        0.047308238   0.382549205   0.882758310
O        0.335981729   0.953584091   0.382440445
O        0.335307922   0.952992437   0.883855163
O        0.618722492   0.664399860   0.383273574
O        0.617319716   0.664957878   0.883290410
O        0.210261236   0.271703812   0.231905123
O        0.210203660   0.271053283   0.731156808
O        0.728773376   0.939190522   0.231170620
O        0.728087866   0.939104324   0.731170059
O        0.061825047   0.791697463   0.240160219
O        0.060729958   0.790131707   0.729661912
O        0.728222293   0.789540777   0.231627155
O        0.728353167   0.789795994   0.730476062
O        0.061045895   0.271791560   0.231354913
O        0.060777854   0.271178385   0.731123620
O        0.211430183   0.938986376   0.230984052
O        0.210416595   0.939236304   0.730904590
O        0.877769276   0.605837887   0.401069296
O        0.875898618   0.603888085   0.895434823
O        0.395481261   0.271927461   0.397977512
O        0.394976178   0.272343867   0.898097655
O        0.727627021   0.123221179   0.397670177
O        0.727099247   0.122586954   0.898295748
O        0.395724466   0.122875855   0.397629704
O        0.395046254   0.122957524   0.898018156
O        0.728176498   0.604869720   0.398477577
O        0.726990032   0.604773002   0.897851702
O        0.876885967   0.272260965   0.397778185
O        0.877215330   0.271973223   0.898368040
O        0.540292330   0.931547052   0.063499268
O        0.545100234   0.940382024   0.565160561
O        0.063876700   0.604576026   0.054561021
O        0.060235996   0.604808114   0.565297510
O        0.393796748   0.456788616   0.064901042
O        0.395365891   0.454878501   0.565202363
O        0.069432495   0.459502132   0.063224347
O        0.059833610   0.454858361   0.565274865
O        0.397226788   0.941352963   0.067357761
O        0.395385821   0.940343346   0.565008808
O        0.543088481   0.606250257   0.064753645
O        0.545000111   0.604752325   0.565009199
H       -0.001251942  -0.000612151   0.462708178
H       -0.003131008  -0.004784620   0.962166910
H        0.669793641   0.337390565   0.129292236
H        0.666874640   0.333258582   0.629106035
H        0.327406674   0.672823572   0.297128508
H        0.332212337   0.666212087   0.795558324
H        0.268949965   0.134310055   0.199698515
H        0.268970740   0.134672674   0.699578050
H        0.865236349   0.134935672   0.199450571
H        0.865433533   0.134836552   0.699457201
H        0.864334868   0.728291959   0.200428060
H        0.863555275   0.730613969   0.698095987
H        0.937356475   0.468779296   0.366440004
H        0.934161988   0.466543536   0.864721613
H        0.532028906   0.467903108   0.366474053
H        0.530942188   0.467914913   0.866127514
H        0.531848667   0.063404290   0.366537828
H        0.530762899   0.063050980   0.866189365
H        0.602399617   0.800722551   0.033554483
H        0.600416619   0.800459649   0.531588336
H        0.216058868   0.797448881   0.031820583
H        0.200669941   0.800277162   0.531429989
H        0.199448170   0.398185549   0.033867078
H        0.199883233   0.399296747   0.531605299
