# Supplementary material for: Theoretical OH stretching vibrations in dravite
Source: Copernicus journal article supplement (doi:10.5194/ejm-34-239-2022), 2022-04-13
Supplement: Supplementary file 3 [file ejm-34-239-2022-supplement.zip › ejm-2021-65-supplement-version2/supplementary_files/Structure_and_eigendisplacement_files/chemically_disordered_models_1x1x2_hexagonal_supercell/dravite_112_Al_Mg_vacancy_conf2.cif]

#======================================================================

# CRYSTAL DATA

#----------------------------------------------------------------------

data_VESTA_phase_1


_pd_phase_name                         
_cell_length_a 16.1067867
_cell_length_b 16.1067867
_cell_length_c 14.55806160
_cell_angle_alpha                      90
_cell_angle_beta                       90
_cell_angle_gamma                      120
_symmetry_space_group_name_H-M         'P1'
_symmetry_Int_Tables_number            1

loop_
_symmetry_equiv_pos_as_xyz
   'x, y, z'

loop_
   _atom_site_label
   _atom_site_fract_x
   _atom_site_fract_y
   _atom_site_fract_z
Na       0.001215592  -0.000832043   0.137899466
Na       0.000161212   0.000803093   0.638125432
Na       0.668894498   0.336310922   0.304490501
Na       0.667334807   0.333274298   0.805279820
Na       0.333549145   0.665697415   0.473667313
Mg       0.126800950   0.063940782   0.323423626
Mg       0.126286726   0.062952758   0.823394598
Mg       0.936708951   0.063317462   0.322817466
Mg       0.936247835   0.063480141   0.823284026
Mg       0.937544176   0.873456509   0.322791058
Mg       0.935815278   0.873381037   0.821215350
Mg       0.793922674   0.396941684   0.489548964
Mg       0.793689566   0.397248532   0.989855834
Mg       0.603654906   0.396861081   0.489712047
Mg       0.603172228   0.396378916   0.989746664
Mg       0.603574220   0.206763912   0.489300170
Mg       0.603405282   0.206792113   0.990008116
Mg       0.459278506   0.729757314   0.152384217
Mg       0.459143206   0.729536992   0.659574579
Al       0.268887041   0.729787423   0.156706338
Mg       0.270516359   0.729621853   0.659578478
Mg       0.270072470   0.541520759   0.151691623
Mg       0.270485499   0.540653230   0.659726927
Al       0.298622077   0.261875672   0.316197279
Al       0.298273150   0.261815659   0.816848424
Al       0.738253357   0.036701672   0.315862561
Al       0.737506883   0.036800458   0.816502069
Al       0.964354519   0.701714372   0.316650130
Al       0.962872136   0.701549909   0.815443855
Al       0.738817256   0.701720732   0.316285395
Al       0.737442530   0.701372425   0.816368657
Al       0.963670293   0.262311650   0.315834622
Al       0.963278892   0.262174420   0.816810313
Al       0.298534832   0.036409833   0.315768452
Al       0.298431461   0.036431664   0.816527097
Al       0.966397529   0.595506196   0.483107063
Al       0.964011841   0.595994179   0.982391998
Al       0.405053340   0.370288771   0.483094305
Al       0.404681150   0.369786696   0.983051526
Al       0.630020687   0.034568647   0.482990931
Al       0.627957706   0.033183716   0.982582933
Al       0.404933856   0.034605445   0.483067920
Al       0.405135289   0.035983790   0.983004495
Al       0.629983074   0.595418495   0.483005537
Al       0.629766983   0.594875446   0.982822704
Al       0.965801930   0.370460278   0.482974715
Al       0.966755332   0.372431472   0.982274953
Al       0.631315159   0.927114846   0.149236576
Al       0.631081778   0.927921099   0.650159161
Mg       0.071135130   0.703163656   0.148189265
Al       0.072434636   0.703773237   0.649999094
Al       0.296506054   0.368474580   0.149317121
Al       0.296513289   0.368467109   0.650259593
Al       0.072966289   0.369632621   0.149033684
Al       0.072119597   0.368549494   0.650145223
Al       0.297779179   0.928678869   0.149322991
Al       0.296499364   0.927812603   0.650099873
Al       0.631816404   0.703103812   0.149326715
Al       0.631174566   0.703443580   0.650017564
Si       0.191563656   0.189563556   0.008414381
Si       0.192846076   0.190845567   0.508157065
Si       0.808176849   0.002613133   0.008048510
Si       0.809246440   0.001985557   0.507978422
Si       0.996447324   0.806571919   0.004943299
Si       0.997752976   0.807240009   0.509067947
Si       0.808879214   0.808778177   0.007158131
Si       0.809278070   0.807440448   0.508348931
Si       0.997802380   0.191129711   0.008355419
Si       0.998280871   0.190923558   0.507844932
Si       0.191877831   0.000276874   0.007916313
Si       0.192657842   0.001662812   0.508109111
Si       0.857391441   0.522854038   0.176241976
Si       0.859526531   0.524130592   0.674530852
Si       0.474939627   0.334588277   0.174735992
Si       0.475862584   0.335247105   0.674780046
Si       0.664412175   0.139804183   0.174491548
Si       0.664756875   0.140864050   0.674514499
Si       0.476441355   0.141271619   0.174933137
Si       0.475897301   0.140703756   0.674617765
Si       0.663262198   0.523219907   0.174849081
Si       0.664627205   0.524071210   0.674706370
Si       0.859570399   0.334959685   0.174354906
Si       0.859454881   0.335367028   0.674614059
Si       0.526848200   0.857045305   0.341285645
Si       0.524950717   0.856737504   0.842451833
Si       0.146481212   0.669293438   0.343435578
Si       0.141893834   0.668730154   0.842402879
Si       0.331578691   0.473971806   0.341081736
Si       0.331178789   0.474025842   0.842667979
Si       0.143525453   0.473829566   0.341763414
Si       0.142861863   0.474712843   0.842204661
Si       0.331779468   0.856252266   0.343392168
Si       0.331090622   0.857125725   0.842687464
Si       0.526132413   0.668707631   0.341139654
Si       0.525330875   0.668268271   0.842492689
B        0.110158258   0.220732255   0.236975721
B        0.110014810   0.220271695   0.737274050
B        0.779834445   0.889757041   0.236659403
B        0.779097875   0.889922805   0.736668370
B        0.110188017   0.890052696   0.240102776
B        0.110061361   0.890168309   0.736228340
B        0.778053514   0.554832482   0.405265058
B        0.775902796   0.553037480   0.902478081
B        0.446454396   0.223035488   0.403486644
B        0.446477206   0.223328336   0.903555907
B        0.777090903   0.223266084   0.403294176
B        0.776795645   0.223010168   0.904191512
B        0.441251148   0.887181103   0.073566865
B        0.443419301   0.886605660   0.571033724
B        0.114075798   0.559634724   0.068183511
B        0.113776941   0.556691084   0.571263926
B        0.443940106   0.556035759   0.071813079
B        0.443364399   0.556592163   0.571188303
O        0.000054837   0.000557578   0.397045914
O       -0.000920215  -0.000294254   0.896274112
O        0.666533058   0.332821631   0.063647888
O        0.666936831   0.333193102   0.563200817
O        0.330098711   0.672852345   0.226584608
O        0.333532380   0.666670239   0.735029993
O        0.061936499   0.124403785   0.249242816
O        0.061745921   0.123873239   0.749450722
O        0.876188598   0.938012563   0.248888702
O        0.875577262   0.938537652   0.748285635
O        0.063674614   0.940793996   0.249314617
O        0.062209415   0.938825093   0.747945556
O        0.729483683   0.458178463   0.416592794
O        0.727583136   0.456656069   0.915398926
O        0.542902182   0.271438892   0.415550118
O        0.542877527   0.271336349   0.915476399
O        0.728901383   0.271509859   0.415281696
O        0.728621690   0.271235102   0.916647478
O        0.387625809   0.791850415   0.092755911
O        0.395317740   0.790389263   0.584146492
O        0.209598943   0.613003715   0.090656763
O        0.209985459   0.604682547   0.584562948
O        0.396612420   0.603495803   0.087018465
O        0.395180811   0.604638502   0.584390476
O        0.270679876   0.135130820   0.266325961
O        0.270477262   0.135264231   0.766628424
O        0.864839918   0.135341827   0.265935248
O        0.864524692   0.135334375   0.766454140
O        0.864072626   0.729831930   0.266938699
O        0.863517303   0.729459643   0.765136443
O        0.937630922   0.468558603   0.432824779
O        0.934310723   0.466773215   0.931566193
O        0.531517243   0.468571909   0.432957607
O        0.531162324   0.467818314   0.933314915
O        0.531586504   0.062721224   0.432923559
O        0.530987055   0.063072673   0.933205673
O        0.603357089   0.801175056   0.098577109
O        0.603198700   0.801819923   0.600190661
O        0.214438518   0.800712123   0.096774717
O        0.198972696   0.802091294   0.600039515
O        0.199086062   0.396801175   0.098731172
O        0.198389065   0.396362685   0.600219581
O        0.091077691   0.183259607   0.043126219
O        0.091651413   0.183111919   0.542529957
O        0.812907492   0.907940201   0.042559092
O        0.816811298   0.908610457   0.542755833
O        0.093091340   0.904544239   0.041422781
O        0.091621582   0.908566361   0.543083550
O        0.754326768   0.512344274   0.209748541
O        0.758224046   0.516450840   0.708565411
O        0.481982095   0.241097334   0.210495944
O        0.483283088   0.241638754   0.709099828
O        0.760117831   0.238956729   0.207733181
O        0.758270110   0.241852287   0.708967178
O        0.426686360   0.850981993   0.376335922
O        0.426234526   0.853288359   0.876996586
O        0.151890350   0.574559894   0.378616663
O        0.146288178   0.573548681   0.875637606
O        0.424945544   0.575224531   0.375564212
O        0.426808539   0.572638501   0.876267178
O        0.183822232   0.090909442   0.053427519
O        0.187520276   0.093684932   0.553500252
O        0.905484544   0.094048020   0.053844471
O        0.906515416   0.093755823   0.553412570
O        0.909357870   0.820774411   0.050621382
O        0.906077447   0.812786195   0.555027517
O        0.849350298   0.423362327   0.220485272
O        0.853637825   0.426790525   0.720356170
O        0.570803245   0.426885052   0.220779559
O        0.573124960   0.426755636   0.720283746
O        0.574326625   0.148021290   0.220445374
O        0.573236168   0.146564919   0.720098328
O        0.520823821   0.760135475   0.387766433
O        0.523833139   0.761903519   0.887024014
O        0.242513879   0.760131181   0.392715600
O        0.237113620   0.762500980   0.887487038
O        0.240057191   0.478586527   0.387996011
O        0.237650774   0.475740229   0.887062946
O        0.199201008   0.189904446   0.397540428
O        0.198429327   0.188905510   0.897804633
O        0.810519239   0.009566676   0.397343961
O        0.810057418   0.009983639   0.897491380
O        0.989141910   0.800886366   0.398975860
O        0.989736046   0.802721236   0.894072929
O        0.810425621   0.801675481   0.397743326
O        0.809250912   0.801805288   0.896533819
O        0.990844965   0.189857320   0.397241510
O        0.990578313   0.189594067   0.897716990
O        0.199235414   0.009150057   0.397482270
O        0.198941410   0.009389072   0.897406927
O        0.864551029   0.521833796   0.065402208
O        0.866403023   0.522387448   0.564115566
O        0.476460053   0.341165068   0.064126910
O        0.477182186   0.342697115   0.564126525
O        0.654682343   0.132030543   0.064167412
O        0.657380191   0.134425756   0.563880344
O        0.477042112   0.136132050   0.064262639
O        0.477232350   0.134363720   0.563980175
O        0.656543290   0.522223332   0.064230233
O        0.656965145   0.522892972   0.564120853
O        0.867675570   0.344130524   0.064039307
O        0.865867732   0.342601903   0.563970596
O        0.532423968   0.855028659   0.230766421
O        0.531659642   0.856596881   0.731450363
O        0.158720490   0.680024126   0.233588571
O        0.144078527   0.676561396   0.731306066
O        0.323102509   0.468018119   0.230744470
O        0.324147126   0.467383348   0.731635924
O        0.145442160   0.468584758   0.231138202
O        0.143544186   0.467651701   0.731273993
O        0.321648851   0.850869857   0.232000252
O        0.324613661   0.856859137   0.731681657
O        0.532420534   0.677105424   0.230789182
O        0.532108275   0.675689524   0.731478755
O        0.283936610   0.285000461   0.050459791
O        0.284715414   0.286637378   0.550064230
O        0.712225524  -0.001446810   0.049999598
O        0.713492853  -0.001836280   0.550008264
O        0.992254218   0.711546444   0.044379920
O        1.002805888   0.715615467   0.550027768
O        0.714814001   0.715542014   0.050144881
O        0.713256935   0.715524887   0.550056220
O        1.002298263   0.287253604   0.050120837
O        1.002200263   0.286647800   0.549930143
O        0.284896607  -0.001344801   0.050312174
O        0.284793761  -0.002068358   0.549800594
O        0.945709337   0.615381925   0.223186252
O        0.951268818   0.620166837   0.715617896
O        0.379337892   0.331049565   0.216552934
O        0.380110542   0.331314182   0.716671007
O        0.666681844   0.047148465   0.216730091
O        0.668285344   0.048885386   0.716453926
O        0.381617918   0.047972770   0.217165766
O        0.380296311   0.048787719   0.716564770
O        0.668341939   0.619635843   0.216789722
O        0.668060607   0.619626419   0.716470634
O        0.952545293   0.333222719   0.216700570
O        0.951196920   0.331364419   0.716490017
O        0.618594096   0.952990765   0.383189730
O        0.617746192   0.953413924   0.883103688
O        0.049219597   0.664234650   0.382861140
O        0.044947797   0.664937255   0.880983541
O        0.335844804   0.382213789   0.383054227
O        0.334656243   0.381117286   0.883684797
O        0.047252882   0.382002505   0.383185339
O        0.046293295   0.381751410   0.882785346
O        0.335662775   0.952800687   0.382598273
O        0.335396303   0.953806116   0.883922198
O        0.617932394   0.664649899   0.383142034
O        0.618092870   0.664731433   0.883498894
O        0.210321527   0.271655189   0.231579398
O        0.210235468   0.271075389   0.731467798
O        0.728834096   0.939125925   0.230830828
O        0.728019696   0.939056510   0.731462842
O        0.061835702   0.791748773   0.239934309
O        0.060749997   0.790150081   0.729958700
O        0.728449073   0.789600202   0.231314461
O        0.728278564   0.789764693   0.730857258
O        0.061215955   0.271989739   0.231044160
O        0.060822919   0.271226580   0.731403421
O        0.211375757   0.939121291   0.230769682
O        0.210466728   0.939197130   0.731235139
O        0.878154235   0.606305320   0.401263128
O        0.875429862   0.603438252   0.895145164
O        0.395246649   0.272074259   0.398139407
O        0.395319552   0.272255378   0.897994820
O        0.727710163   0.122952436   0.397714160
O        0.727023955   0.122790244   0.898254738
O        0.395477384   0.122672612   0.397860413
O        0.395365491   0.123183991   0.897948955
O        0.728166313   0.605280707   0.398663873
O        0.726933206   0.604369361   0.897763727
O        0.877322097   0.272397897   0.397825603
O        0.876835852   0.271891538   0.898305228
O        0.540951727   0.932721881   0.063601306
O        0.543677617   0.937819064   0.564663541
O        0.061399320   0.603470081   0.054699294
O        0.062838141   0.605911193   0.564956078
O        0.394831416   0.455315382   0.065267373
O        0.394333880   0.456367205   0.564888806
O        0.067935017   0.458654964   0.062849325
O        0.062465140   0.456400192   0.564846948
O        0.397805036   0.942956022   0.067190532
O        0.394383182   0.937805270   0.564653837
O        0.544554537   0.605236296   0.065158008
O        0.543539206   0.605861416   0.564667679
H       -0.001193061  -0.000456598   0.462882103
H       -0.003208622  -0.005037095   0.961986645
H        0.669644477   0.337193602   0.129364359
H        0.667041264   0.333310206   0.629063543
H        0.322117511   0.670370334   0.292105868
H        0.333108760   0.666569563   0.801335637
H        0.268731290   0.134203872   0.199563915
H        0.269427156   0.134834715   0.699867914
H        0.865584502   0.134753782   0.199137495
H        0.865206049   0.135019696   0.699694952
H        0.864581738   0.728701314   0.200229574
H        0.863316619   0.730203188   0.698369648
H        0.937186621   0.468811727   0.366036991
H        0.933709897   0.466462440   0.864821876
H        0.531959191   0.467964389   0.366156722
H        0.530854292   0.467981732   0.866560109
H        0.532003520   0.063683075   0.366151702
H        0.530468328   0.062435942   0.866447482
H        0.601862336   0.800410015   0.031715576
H        0.600894248   0.800672719   0.533437806
H        0.216828596   0.797796154   0.029921706
H        0.200517572   0.800601655   0.533297347
H        0.199551265   0.398374612   0.031864524
H        0.199652875   0.398774768   0.533468238
