# Supplementary material for: Theoretical OH stretching vibrations in dravite
Source: Copernicus journal article supplement (doi:10.5194/ejm-34-239-2022), 2022-04-13
Supplement: Supplementary file 3 [file ejm-34-239-2022-supplement.zip › ejm-2021-65-supplement-version2/supplementary_files/Structure_and_eigendisplacement_files/chemically_disordered_models_1x1x2_hexagonal_supercell/dravite_112_Al_vacancy_conf1.cif]

#======================================================================

# CRYSTAL DATA

#----------------------------------------------------------------------

data_VESTA_phase_1


_pd_phase_name                         
_cell_length_a 16.1067867
_cell_length_b 16.1067867
_cell_length_c 14.55806160
_cell_angle_alpha                      90
_cell_angle_beta                       90
_cell_angle_gamma                      120
_symmetry_space_group_name_H-M         'P1'
_symmetry_Int_Tables_number            1

loop_
_symmetry_equiv_pos_as_xyz
   'x, y, z'

loop_
   _atom_site_label
   _atom_site_fract_x
   _atom_site_fract_y
   _atom_site_fract_z
Na       0.000095527   0.000155763   0.138346755
Na      -0.000337117   0.000548158   0.638105346
Na       0.666447649   0.333487594   0.305180204
Na       0.666658171   0.333311909   0.804717885
Na       0.334594721   0.665429751   0.969720821
Mg       0.127010338   0.063214481   0.322773546
Mg       0.126344983   0.063560641   0.823203223
Mg       0.936807420   0.063181257   0.323164692
Mg       0.936417064   0.063519197   0.823180856
Mg       0.936784127   0.872990827   0.322683769
Mg       0.936373157   0.873591979   0.823038472
Mg       0.793167433   0.396378502   0.489725281
Mg       0.793648544   0.396792564   0.989459869
Mg       0.603552213   0.396462023   0.489869755
Mg       0.603207239   0.396834012   0.989699007
Mg       0.603623974   0.206837256   0.489753900
Mg       0.603263393   0.206426614   0.989532160
Mg       0.460056022   0.730077911   0.159285421
Mg       0.458219173   0.728996060   0.652219616
Al       0.268942465   0.731097791   0.161300740
Mg       0.270920533   0.729069175   0.652296224
Mg       0.269936015   0.539962363   0.159279435
Mg       0.270983892   0.541760955   0.652201085
Al       0.299052329   0.262259555   0.316979888
Al       0.298327433   0.262128994   0.816213641
Al       0.738138957   0.036630149   0.316720496
Al       0.737940262   0.036701324   0.815936148
Al       0.963098127   0.700954145   0.316485509
Al       0.963179907   0.701885741   0.815545928
Al       0.737751228   0.700954332   0.316951392
Al       0.737838229   0.701655223   0.816177546
Al       0.963383697   0.261866338   0.316722229
Al       0.963298631   0.262038012   0.815942652
Al       0.299071680   0.036935907   0.316524140
Al       0.298111930   0.036812248   0.815586007
Al       0.964870706   0.594513568   0.483113359
Al       0.964685037   0.595351105   0.981807231
Al       0.405266194   0.369829371   0.483593216
Al       0.404516734   0.370602215   0.982961331
Al       0.630377324   0.035202309   0.483424662
Al       0.628188019   0.032789128   0.982300169
Al       0.405483163   0.035138190   0.483143802
Al       0.404690906   0.035363110   0.981846162
Al       0.630168922   0.594723603   0.483573616
Al       0.629390583   0.595483068   0.982935444
Al       0.964805225   0.369622348   0.483422115
Al       0.967239028   0.371815457   0.982295861
Al       0.631228971   0.927058281   0.150477496
Al       0.631329908   0.927880474   0.649202373
Al       0.069781518   0.701876603   0.149750791
Al       0.071971014   0.703471729   0.648986484
Al       0.297152071   0.368990593   0.150753709
Al       0.296539441   0.368525257   0.649179440
Al       0.072967913   0.368782469   0.150471920
Al       0.072106192   0.368648752   0.649206999
Al       0.298183375   0.930273446   0.149797270
Al       0.296533387   0.928031433   0.649021397
Al       0.631022333   0.702868841   0.150729033
Al       0.631449097   0.703446298   0.649148667
Si       0.192345039   0.191071492   0.008396815
Si       0.192708370   0.190474620   0.507905030
Si       0.808463592   0.002162853   0.008323559
Si       0.809518862   0.001781193   0.508059286
Si       0.998052934   0.807733343   0.007945999
Si       0.998337393   0.807326697   0.507444916
Si       0.808917502   0.807647957   0.008344809
Si       0.809510713   0.807268866   0.507858606
Si       0.997858066   0.191533331   0.008328837
Si       0.998199945   0.190463570   0.508070738
Si       0.192276716   0.001954627   0.007990541
Si       0.192663239   0.001660796   0.507485843
Si       0.859424017   0.523819648   0.174400156
Si       0.859101414   0.524111204   0.674667573
Si       0.475911705   0.335077405   0.174668994
Si       0.475928563   0.335065287   0.674992592
Si       0.664627641   0.139983845   0.174243145
Si       0.664906047   0.140931050   0.674787574
Si       0.476224592   0.140643563   0.174447714
Si       0.475878119   0.140900174   0.674699442
Si       0.664964226   0.524124054   0.174637637
Si       0.664919583   0.524050584   0.674977798
Si       0.860059391   0.335397443   0.174216817
Si       0.859066109   0.335077017   0.674778241
Si       0.526707467   0.857214827   0.342717924
Si       0.525112352   0.856607947   0.840885130
Si       0.143831821   0.668536313   0.343205291
Si       0.142866248   0.669102958   0.841003980
Si       0.331712419   0.474159729   0.343300043
Si       0.331146053   0.474303856   0.841001132
Si       0.142794266   0.473312348   0.342708565
Si       0.143394107   0.474886803   0.840876912
Si       0.331497189   0.856193712   0.343230837
Si       0.330909528   0.857139408   0.841027208
Si       0.525857046   0.668290021   0.343287208
Si       0.525685467   0.668847117   0.840991613
B        0.110561574   0.220436152   0.237123033
B        0.110099574   0.220451847   0.737043300
B        0.779572019   0.889457999   0.237088837
B        0.779515552   0.889884319   0.736975772
B        0.110754914   0.889280410   0.235986131
B        0.109950449   0.890048023   0.736687133
B        0.776988834   0.553341971   0.403436074
B        0.776628890   0.554000610   0.903802073
B        0.446670851   0.223036716   0.403460337
B        0.446014798   0.223385346   0.903838054
B        0.776762936   0.223243421   0.403325787
B        0.777093799   0.222919117   0.904232095
B        0.440066756   0.885613609   0.072853182
B        0.444312198   0.888366223   0.571516815
B        0.114424867   0.559970892   0.072840155
B        0.111629482   0.555676098   0.571511060
B        0.442863571   0.557147056   0.071483225
B        0.444313237   0.555675879   0.571719514
O        0.000477162  -0.000516723   0.396009328
O       -0.000320522   0.000130271   0.897197871
O        0.666947178   0.333198515   0.063617938
O        0.666831291   0.333186857   0.563299666
O        0.327063365   0.672945794   0.231271760
O        0.333219710   0.666738426   0.729691229
O        0.062275733   0.123981160   0.248890073
O        0.061745316   0.124030683   0.749444682
O        0.876031031   0.937744858   0.248822952
O        0.875940719   0.938247748   0.749315218
O        0.062708588   0.937339199   0.248365171
O        0.061769016   0.938241387   0.749271567
O        0.728781515   0.456985841   0.415217593
O        0.728785430   0.457600008   0.916163779
O        0.543025767   0.271237668   0.415241902
O        0.542416036   0.271228011   0.916221711
O        0.728541047   0.271451862   0.414899757
O        0.728870849   0.271143716   0.916800067
O        0.385232670   0.788191879   0.090547765
O        0.397002754   0.793968962   0.585745110
O        0.211846901   0.614801418   0.090542921
O        0.206024104   0.602987237   0.585733447
O        0.394381947   0.605630317   0.085189098
O        0.397107469   0.602878064   0.585992356
O        0.270834951   0.134717564   0.265860364
O        0.270141903   0.135291496   0.766576883
O        0.864727343   0.135278265   0.266149439
O        0.864730236   0.135263365   0.766516249
O        0.865289138   0.729163446   0.265818377
O        0.864675401   0.729832519   0.766516582
O        0.936620518   0.468198259   0.433313595
O        0.937976944   0.469462241   0.932655117
O        0.532013797   0.467980102   0.433618496
O        0.531126491   0.468868807   0.933153329
O        0.531792501   0.063381838   0.433334544
O        0.530545042   0.062058043   0.932693196
O        0.602121869   0.800662981   0.100384454
O        0.604043470   0.802045121   0.598737933
O        0.204656563   0.795406903   0.099176495
O        0.197972403   0.802031852   0.598827104
O        0.199364074   0.397894900   0.100391094
O        0.197949344   0.395930753   0.598752863
O        0.090936414   0.183090935   0.043109317
O        0.091791143   0.183073086   0.542408628
O        0.816926865   0.909076508   0.043042131
O        0.816911422   0.908184411   0.542362450
O        0.092016539   0.907980564   0.043394556
O        0.091782909   0.908199576   0.541980413
O        0.760417513   0.520040765   0.208885759
O        0.758379476   0.516660667   0.710287053
O        0.479988106   0.239633771   0.208966575
O        0.483301003   0.241604446   0.710328245
O        0.759947532   0.240095741   0.206793121
O        0.758152356   0.241841120   0.710252103
O        0.427278891   0.853660423   0.374610067
O        0.424262351   0.849491252   0.876676152
O        0.146344919   0.572743746   0.374573485
O        0.150508833   0.575743481   0.876636932
O        0.426842683   0.573171187   0.376588803
O        0.425004092   0.574990277   0.876130940
O        0.187082168   0.093701539   0.053838219
O        0.186762695   0.092970334   0.553103153
O        0.904928400   0.095077203   0.054008201
O        0.906949813   0.093028488   0.553735363
O        0.906301407   0.812933060   0.053777588
O        0.907001753   0.813184208   0.553042631
O        0.851270333   0.425392136   0.219762057
O        0.853932812   0.427051245   0.720208903
O        0.575078034   0.424974684   0.219751520
O        0.573153492   0.426834385   0.720493788
O        0.574665018   0.148818239   0.219811341
O        0.572938078   0.146063182   0.720237509
O        0.524808618   0.762272942   0.387266399
O        0.519001031   0.759595316   0.887956575
O        0.238616535   0.761403868   0.388019303
O        0.239359988   0.760638135   0.888511670
O        0.237736077   0.475223369   0.387273248
O        0.240406430   0.481010049   0.887961293
O        0.199086491   0.189010787   0.397228577
O        0.198698028   0.189895437   0.897843998
O        0.810808644   0.009378170   0.397365969
O        0.809868145   0.009347596   0.897782390
O        0.991439372   0.801074132   0.396646676
O        0.990707096   0.801319793   0.897500937
O        0.810999808   0.800914725   0.397180654
O        0.810075690   0.801297229   0.897790455
O        0.990623676   0.189194297   0.397376888
O        0.990656463   0.190108407   0.897789058
O        0.198949436   0.008590049   0.396692427
O        0.198684136   0.009282292   0.897545552
O        0.866223799   0.523441329   0.063863590
O        0.864476525   0.522817593   0.563993627
O        0.476884111   0.343319295   0.064179468
O        0.477305789   0.341459929   0.564311991
O        0.654507350   0.131306914   0.063895314
O        0.658546708   0.135642080   0.564100123
O        0.476596383   0.133853797   0.063908227
O        0.477173826   0.135519619   0.564025677
O        0.656707035   0.523144230   0.064150692
O        0.658529698   0.522684805   0.564297916
O        0.868712707   0.345495713   0.063867682
O        0.864358134   0.341440754   0.564091156
O        0.531444364   0.855698688   0.231342401
O        0.532460377   0.855773708   0.730791410
O        0.150692302   0.679966744   0.230376573
O        0.144106652   0.677244743   0.730898638
O        0.324480941   0.468953420   0.231981188
O        0.322674839   0.466945965   0.730902766
O        0.144318892   0.468568398   0.231333557
O        0.144225702   0.467520573   0.730785294
O        0.320090388   0.849347319   0.230400372
O        0.322764431   0.855885393   0.730919653
O        0.531058367   0.675525809   0.231968260
O        0.533028937   0.677306222   0.730891929
O        0.284298861   0.286901988   0.050527767
O        0.284672921   0.285678471   0.550124635
O        0.711303091  -0.003643668   0.049932853
O        0.714271268  -0.001290900   0.550080175
O        1.002951229   0.716187801   0.050039048
O        1.001678389   0.715209981   0.549193348
O        0.713095744   0.715707299   0.050494120
O        0.714303257   0.715315922   0.550086612
O        1.003684040   0.288715889   0.049918160
O        1.001278060   0.285715628   0.550086716
O        0.283835439  -0.002927745   0.050074283
O        0.284783142  -0.001673330   0.549231402
O        0.953103664   0.618601259   0.216624892
O        0.951117497   0.619937829   0.716560307
O        0.381032229   0.332761163   0.217041402
O        0.380238441   0.331380494   0.716970585
O        0.667069983   0.047476501   0.216467716
O        0.668553042   0.048935991   0.716795894
O        0.381440554   0.046948629   0.216662380
O        0.380057416   0.048877497   0.716592963
O        0.667270274   0.618996574   0.217008632
O        0.668595061   0.619740629   0.716941602
O        0.952549937   0.332932352   0.216451676
O        0.951058905   0.331430562   0.716797886
O        0.618811200   0.953846722   0.383271892
O        0.617089018   0.952547233   0.883163365
O        0.046867068   0.664459317   0.381314462
O        0.046950941   0.665011173   0.883477603
O        0.335542554   0.381386094   0.383530142
O        0.334731715   0.382286800   0.883654408
O        0.046165291   0.381206918   0.383270931
O        0.047463933   0.382911812   0.883160928
O        0.335560501   0.953154488   0.381338459
O        0.335012929   0.953059125   0.883512772
O        0.618625268   0.664443728   0.383500871
O        0.617708585   0.665261379   0.883629195
O        0.210827811   0.271615234   0.231629320
O        0.210276302   0.271203002   0.731246939
O        0.728471476   0.938670909   0.231330223
O        0.728495382   0.939063244   0.731356162
O        0.062071305   0.788903626   0.230108125
O        0.060681501   0.789810509   0.730870895
O        0.728383460   0.789190132   0.231609108
O        0.728763815   0.789703873   0.731197952
O        0.061355608   0.271540972   0.231341951
O        0.060913543   0.271462334   0.731359109
O        0.211133928   0.937953679   0.230148939
O        0.210188788   0.939301352   0.730912833
O        0.877351859   0.604355951   0.397507707
O        0.877016694   0.605240354   0.898103046
O        0.395452939   0.271889408   0.398078010
O        0.395033807   0.272567955   0.898400360
O        0.727695146   0.123095959   0.397729868
O        0.727499955   0.122610937   0.898540994
O        0.395655249   0.122673985   0.397544931
O        0.394770146   0.122998775   0.898135968
O        0.728135547   0.604559433   0.398063464
O        0.727441029   0.604977482   0.898377170
O        0.876910699   0.272315331   0.397718058
O        0.877401740   0.272496152   0.898539174
O        0.539096308   0.931248114   0.063570659
O        0.545055089   0.940202945   0.565197946
O        0.061298962   0.605938643   0.065988847
O        0.059994363   0.604841759   0.564841339
O        0.393719374   0.457175330   0.065041536
O        0.395291697   0.454879037   0.565430291
O        0.068771994   0.460936627   0.063564581
O        0.059798036   0.454933085   0.565196052
O        0.394126513   0.938768275   0.066040046
O        0.395139760   0.939995004   0.564853004
O        0.542834635   0.606300662   0.065022235
O        0.545109504   0.604699961   0.565414919
H        0.000546874  -0.000883690   0.461881399
H       -0.001352384   0.000257378   0.963038167
H        0.666901127   0.333589030   0.129488759
H        0.666876033   0.333328925   0.629149408
H        0.326366917   0.673694337   0.297774563
H        0.333426471   0.666348428   0.795468303
H        0.269694491   0.134762247   0.199083633
H        0.269157475   0.135056864   0.699783443
H        0.865368474   0.134620217   0.199362695
H        0.865264369   0.134751858   0.699721925
H        0.865196865   0.730251378   0.199041443
H        0.864883480   0.730767963   0.699722058
H        0.936492446   0.467882717   0.366579833
H        0.937423584   0.469073953   0.865832281
H        0.531612774   0.468383101   0.366895200
H        0.531376064   0.468569701   0.866347579
H        0.532085714   0.063481349   0.366601292
H        0.530918707   0.062622738   0.865870536
H        0.601754461   0.800261383   0.033573997
H        0.601118563   0.800625283   0.531933257
H        0.206481833   0.793602222   0.032141319
H        0.199314243   0.800721370   0.532059811
H        0.199773112   0.398256938   0.033580928
H        0.199370869   0.398841548   0.531948088
