# Supplementary material for: Theoretical OH stretching vibrations in dravite
Source: Copernicus journal article supplement (doi:10.5194/ejm-34-239-2022), 2022-04-13
Supplement: Supplementary file 3 [file ejm-34-239-2022-supplement.zip › ejm-2021-65-supplement-version2/supplementary_files/Structure_and_eigendisplacement_files/chemically_disordered_models_1x1x2_hexagonal_supercell/dravite_112_Al_vacancy_conf2.cif]

#======================================================================

# CRYSTAL DATA

#----------------------------------------------------------------------

data_VESTA_phase_1


_pd_phase_name                         
_cell_length_a 16.1067867
_cell_length_b 16.1067867
_cell_length_c 14.55806160
_cell_angle_alpha                      90
_cell_angle_beta                       90
_cell_angle_gamma                      120
_symmetry_space_group_name_H-M         'P1'
_symmetry_Int_Tables_number            1

loop_
_symmetry_equiv_pos_as_xyz
   'x, y, z'

loop_
   _atom_site_label
   _atom_site_fract_x
   _atom_site_fract_y
   _atom_site_fract_z
Na      -0.000049703   0.000199558   0.138027926
Na      -0.000349162   0.000476440   0.638496088
Na       0.666219377   0.333711221   0.305207277
Na       0.666725618   0.333273225   0.804827963
Na       0.335152610   0.664985940   0.474067823
Mg       0.126868903   0.063211730   0.322794490
Mg       0.126415758   0.063588632   0.823229460
Mg       0.936785485   0.063180152   0.323170316
Mg       0.936386670   0.063566755   0.823189120
Mg       0.936764133   0.873109806   0.322734837
Mg       0.936370108   0.873533201   0.823137429
Mg       0.793466261   0.396517322   0.489704524
Mg       0.793413531   0.396641097   0.989428273
Mg       0.603363475   0.396634653   0.490032931
Mg       0.603417300   0.396578268   0.989781274
Mg       0.603462293   0.206516238   0.489735566
Mg       0.603358790   0.206588101   0.989449476
Mg       0.459063926   0.729853800   0.152115612
Mg       0.459272107   0.729533884   0.659767132
Al       0.269338111   0.730639888   0.155762500
Mg       0.270444975   0.729546845   0.659219939
Mg       0.270105157   0.540914124   0.151970608
Mg       0.270448478   0.540718161   0.659744975
Al       0.298881877   0.262082832   0.316370911
Al       0.298478449   0.262298126   0.816993469
Al       0.738244253   0.036600337   0.315962147
Al       0.737738707   0.036665513   0.816590788
Al       0.962899612   0.701102357   0.315880376
Al       0.963281408   0.701744472   0.816226272
Al       0.737903432   0.701102887   0.316362083
Al       0.737678235   0.701500387   0.816981573
Al       0.963370390   0.261726112   0.315953448
Al       0.963329957   0.262245537   0.816586052
Al       0.298889145   0.037091523   0.315902363
Al       0.298233984   0.036701110   0.816250734
Al       0.965633760   0.594937226   0.482999316
Al       0.963971890   0.594897174   0.981924714
Al       0.404802955   0.370192389   0.483511213
Al       0.405007780   0.370258472   0.983192056
Al       0.629921760   0.034361410   0.483176962
Al       0.628101711   0.033117435   0.982341006
Al       0.405043294   0.034350007   0.483009103
Al       0.405098731   0.036016583   0.981940580
Al       0.629800310   0.595179814   0.483511729
Al       0.629725833   0.594970593   0.983185905
Al       0.965624343   0.370060059   0.483173714
Al       0.966870883   0.371882041   0.982333882
Al       0.631230716   0.926934296   0.149174897
Al       0.631271694   0.927824586   0.650309092
Al       0.069530328   0.701849595   0.148768937
Al       0.072068693   0.703523631   0.650085923
Al       0.297085220   0.368788158   0.149542943
Al       0.296497317   0.368513305   0.650455402
Al       0.073037754   0.368744297   0.149168050
Al       0.072164816   0.368713916   0.650300289
Al       0.298154829   0.930469274   0.148794269
Al       0.296468561   0.927922707   0.650105015
Al       0.631197481   0.702901972   0.149539636
Al       0.631463738   0.703479637   0.650448064
Si       0.192020270   0.190673273   0.008497832
Si       0.192834057   0.190725388   0.507890515
Si       0.808621155   0.002230179   0.008334183
Si       0.809205577   0.001750411   0.507941954
Si       0.998093530   0.807870313   0.008025283
Si       0.998347734   0.807138401   0.507443198
Si       0.809303205   0.807956345   0.008476546
Si       0.809254204   0.807137197   0.507874601
Si       0.997762076   0.191360516   0.008330579
Si       0.998219003   0.190765036   0.507945395
Si       0.192108255   0.001885827   0.008048770
Si       0.192837102   0.001631962   0.507463661
Si       0.859136008   0.523634477   0.174630953
Si       0.859386426   0.524134852   0.674585394
Si       0.476049906   0.334897478   0.174970204
Si       0.475884913   0.335221073   0.674940890
Si       0.664633816   0.139993278   0.174297402
Si       0.664716081   0.140658819   0.674610079
Si       0.476359343   0.140872833   0.174644546
Si       0.475838473   0.140604473   0.674602738
Si       0.665111170   0.523950294   0.174958165
Si       0.664763843   0.524091270   0.674938126
Si       0.859997426   0.335350779   0.174283853
Si       0.859321336   0.335251160   0.674600115
Si       0.526551630   0.856938651   0.340836491
Si       0.525047162   0.856791731   0.842477252
Si       0.143816263   0.668887330   0.341318723
Si       0.142659088   0.668776449   0.842534764
Si       0.331306019   0.474075021   0.341422652
Si       0.331488236   0.474350452   0.842777795
Si       0.143037920   0.473428156   0.340808893
Si       0.143198049   0.474944048   0.842465666
Si       0.331136580   0.856187346   0.341328175
Si       0.331219053   0.857327575   0.842547906
Si       0.525914366   0.668678487   0.341442557
Si       0.525636737   0.668496498   0.842782997
B        0.110537671   0.220390156   0.236850889
B        0.110118469   0.220501767   0.737326870
B        0.779594507   0.889451913   0.236836027
B        0.779476754   0.889864274   0.737290153
B        0.110613830   0.889378404   0.235687348
B        0.109968548   0.890015161   0.736943694
B        0.777095276   0.553752141   0.403717753
B        0.776457855   0.553552932   0.903691399
B        0.446242769   0.222908944   0.403726984
B        0.446437931   0.223534455   0.903708090
B        0.776948132   0.223034207   0.403395823
B        0.776920326   0.223073611   0.904139373
B        0.440370789   0.886723468   0.072653652
B        0.443329375   0.886361052   0.570957146
B        0.113247068   0.559621534   0.072620205
B        0.113631834   0.556657703   0.570943660
B        0.443765139   0.556230749   0.072060675
B        0.443496942   0.556486824   0.571678237
O        0.000403725  -0.000458567   0.396281344
O       -0.000291565   0.000168508   0.897063360
O        0.667026067   0.332998013   0.063678250
O        0.666855507   0.333140164   0.563283262
O        0.327032813   0.672889878   0.226916079
O        0.333180671   0.666784424   0.734910642
O        0.062185650   0.123962630   0.249036199
O        0.061748524   0.124054554   0.749312194
O        0.876024650   0.937803848   0.248994273
O        0.875926512   0.938240277   0.749240014
O        0.062576944   0.937423556   0.248506880
O        0.061776672   0.938216724   0.749184255
O        0.728893565   0.457403705   0.415893416
O        0.728610158   0.457140875   0.915672720
O        0.542590194   0.271104548   0.415912848
O        0.542850160   0.271381196   0.915695175
O        0.728721737   0.271249415   0.415302687
O        0.728687332   0.271302420   0.916383634
O        0.386294517   0.791161450   0.091769417
O        0.395202240   0.790103894   0.583817446
O        0.208812130   0.613712037   0.091686466
O        0.209889642   0.604796311   0.583793727
O        0.396318370   0.603704844   0.087505033
O        0.395388326   0.604609844   0.584813992
O        0.270633204   0.134698023   0.265726170
O        0.270360589   0.135356347   0.766848644
O        0.864805713   0.135165399   0.265857158
O        0.864619687   0.135371705   0.766709588
O        0.865283600   0.729344911   0.265697434
O        0.864617057   0.729612310   0.766813124
O        0.937611759   0.468727032   0.432853385
O        0.937078447   0.469116706   0.932925069
O        0.531386368   0.468599999   0.433317542
O        0.531716053   0.468273004   0.933708389
O        0.531249417   0.062375699   0.432865103
O        0.530872124   0.062920915   0.932937867
O        0.602953397   0.801023059   0.098471016
O        0.603502523   0.801742437   0.600538215
O        0.204481962   0.795511862   0.097340030
O        0.198219315   0.801770487   0.600413155
O        0.198943865   0.397012808   0.098455404
O        0.198245100   0.396480870   0.600533790
O        0.090950266   0.183302800   0.043225383
O        0.091626157   0.182912112   0.542277903
O        0.816701581   0.909043434   0.043196614
O        0.817063952   0.908343654   0.542259017
O        0.092621229   0.907352126   0.043641033
O        0.091711728   0.908260616   0.541874947
O        0.759840943   0.518808262   0.210272361
O        0.758442911   0.516681646   0.709175870
O        0.481189671   0.240167662   0.210288439
O        0.483278978   0.241539572   0.709196995
O        0.759667831   0.240324932   0.207322195
O        0.758184348   0.241793676   0.709017332
O        0.425186013   0.849805592   0.373996586
O        0.426305501   0.853531951   0.877016876
O        0.150248735   0.574845049   0.373939563
O        0.146455169   0.573687061   0.876986270
O        0.424715064   0.575267333   0.375869000
O        0.427100429   0.572883632   0.876602716
O        0.185665207   0.092862825   0.054069782
O        0.187473505   0.093363247   0.552901928
O        0.905281739   0.094706517   0.054176298
O        0.906398286   0.093571583   0.553373224
O        0.907115914   0.814313394   0.054041981
O        0.906613417   0.812492777   0.552878966
O        0.852474661   0.425910814   0.220245810
O        0.853747191   0.426906044   0.720097379
O        0.574612152   0.425396827   0.220331516
O        0.573273161   0.426709069   0.720411441
O        0.574084506   0.147537541   0.220257081
O        0.573062049   0.146228291   0.720116576
O        0.520176546   0.760061386   0.387660616
O        0.523974045   0.762079073   0.887340867
O        0.240636757   0.759370091   0.388039188
O        0.237185056   0.762800470   0.887900040
O        0.239925534   0.479826997   0.387633462
O        0.237910451   0.476022582   0.887336680
O        0.199229007   0.189384484   0.397211469
O        0.198492734   0.189465743   0.897959633
O        0.810367641   0.009174199   0.397240272
O        0.810191373   0.009492951   0.897810624
O        0.991482080   0.800897588   0.396643347
O        0.990588747   0.801491316   0.897595860
O        0.810606212   0.800747505   0.397195166
O        0.810514155   0.801489043   0.897937115
O        0.990795831   0.189614047   0.397244204
O        0.990500146   0.189788324   0.897807703
O        0.199086374   0.008500251   0.396664931
O        0.198490300   0.009388586   0.897619918
O        0.864824484   0.523183473   0.064060798
O        0.865950494   0.522954631   0.563937955
O        0.477146585   0.342049614   0.064443110
O        0.477080915   0.342622854   0.564272745
O        0.654948039   0.131987748   0.063972746
O        0.657313247   0.134193093   0.563941537
O        0.476809386   0.135173609   0.064075020
O        0.477011171   0.134028618   0.563954558
O        0.657966328   0.522848089   0.064430225
O        0.657372663   0.522907154   0.564269957
O        0.867995939   0.345032519   0.063959298
O        0.865786294   0.342651769   0.563932224
O        0.531789856   0.854843083   0.230226113
O        0.531713261   0.856594196   0.731512387
O        0.150663639   0.681032063   0.229529261
O        0.143469952   0.675918044   0.731597193
O        0.322786087   0.468030361   0.231013014
O        0.324100062   0.467546247   0.731799994
O        0.145145355   0.468213045   0.230194993
O        0.143400519   0.468273150   0.731501357
O        0.318966969   0.849335726   0.229542366
O        0.324080125   0.856514391   0.731608900
O        0.531960415   0.677182034   0.231033109
O        0.532435811   0.675877083   0.731804395
O        0.284343142   0.285838976   0.050711171
O        0.284528245   0.286514172   0.550048420
O        0.711947755  -0.002789310   0.049928534
O        0.713330373  -0.002266368   0.549864396
O        1.001840771   0.715875342   0.050156542
O        1.002523693   0.715275129   0.549124584
O        0.714138732   0.715642870   0.050695907
O        0.713467448   0.715447692   0.550041983
O        1.002778626   0.288038421   0.049914939
O        1.002250210   0.286649970   0.549861520
O        0.284113459  -0.001855713   0.050170357
O        0.284699277  -0.002542419   0.549144770
O        0.952682365   0.618738626   0.216742257
O        0.951291271   0.619987286   0.716375073
O        0.380978364   0.332377073   0.217249851
O        0.380158607   0.331369972   0.716835413
O        0.667273700   0.047519371   0.216469471
O        0.668527625   0.048795402   0.716525775
O        0.381253845   0.047324974   0.216756005
O        0.379986112   0.048694362   0.716390737
O        0.667622863   0.619016404   0.217240156
O        0.668609451   0.619814392   0.716830245
O        0.952467010   0.332700844   0.216455093
O        0.951191852   0.331455886   0.716521437
O        0.617944736   0.952857948   0.382873442
O        0.617832614   0.953512612   0.883157160
O        0.047569978   0.664634699   0.381186105
O        0.046063386   0.664858694   0.883540660
O        0.335310277   0.382206349   0.383372718
O        0.335002623   0.381493350   0.883886235
O        0.047121667   0.382053609   0.382858576
O        0.046479910   0.382162443   0.883151593
O        0.335358925   0.952429481   0.381191522
O        0.335134644   0.953922946   0.883556771
O        0.617784722   0.664663786   0.383373910
O        0.618495487   0.664981953   0.883884161
O        0.210776286   0.271465738   0.231342042
O        0.210304003   0.271236625   0.731623820
O        0.728403461   0.938559903   0.230996526
O        0.728427126   0.939012901   0.731628153
O        0.061889030   0.789009553   0.229799503
O        0.060716450   0.789778950   0.731141860
O        0.728512357   0.789211722   0.231340638
O        0.728742470   0.789675118   0.731600769
O        0.061429397   0.271581233   0.231001320
O        0.060967324   0.271546523   0.731621758
O        0.210983161   0.938107470   0.229815948
O        0.210203504   0.939255525   0.731165763
O        0.877567226   0.604689790   0.397713967
O        0.876702083   0.604860953   0.897986629
O        0.395106355   0.271985242   0.398269533
O        0.395393096   0.272510122   0.898370731
O        0.727648492   0.122738936   0.397736641
O        0.727476897   0.122907460   0.898470218
O        0.395299549   0.122437043   0.397728794
O        0.395123050   0.123289562   0.898008521
O        0.728025538   0.604894400   0.398273018
O        0.727486503   0.604600552   0.898364789
O        0.877243324   0.272342824   0.397722725
O        0.877086496   0.272512662   0.898461637
O        0.539943554   0.932712073   0.063565557
O        0.543539211   0.937612217   0.564655404
O        0.059071554   0.604930675   0.066050417
O        0.062646537   0.605964349   0.564320854
O        0.394745801   0.455686864   0.065457072
O        0.394260666   0.456290423   0.565158081
O        0.067264245   0.460044604   0.063556009
O        0.062383591   0.456445057   0.564642465
O        0.395062828   0.940901448   0.066056205
O        0.394005660   0.937328769   0.564326149
O        0.544307047   0.605222097   0.065466452
O        0.543694398   0.605713657   0.565164797
H        0.000571082  -0.000836857   0.462149116
H       -0.001273786   0.000590888   0.962902505
H        0.666751195   0.333414634   0.129535147
H        0.666990683   0.333238735   0.629149302
H        0.324410874   0.674349798   0.292807198
H        0.333278895   0.666628925   0.801217360
H        0.269251840   0.134629550   0.198934216
H        0.269635291   0.135279903   0.700078466
H        0.865593457   0.134350326   0.199051428
H        0.865026297   0.134972882   0.699935951
H        0.865322920   0.730698249   0.198904421
H        0.864666346   0.730307565   0.700042217
H        0.936190470   0.467795729   0.366092492
H        0.937787946   0.469419144   0.866138332
H        0.531697493   0.468306354   0.366554840
H        0.531299588   0.468667557   0.866938886
H        0.532158458   0.063763868   0.366104498
H        0.530562062   0.062214292   0.866150189
H        0.601512495   0.800105445   0.031579817
H        0.601548500   0.800790037   0.533789466
H        0.206621714   0.793397895   0.030213088
H        0.199110921   0.800895058   0.533698704
H        0.199845993   0.398400750   0.031564192
H        0.199200750   0.398431930   0.533785518
