# Supplementary material for: Theoretical OH stretching vibrations in dravite
Source: Copernicus journal article supplement (doi:10.5194/ejm-34-239-2022), 2022-04-13
Supplement: Supplementary file 3 [file ejm-34-239-2022-supplement.zip › ejm-2021-65-supplement-version2/supplementary_files/Structure_and_eigendisplacement_files/chemically_disordered_models_1x1x2_hexagonal_supercell/dravite_112_Mg.cif]

#======================================================================

# CRYSTAL DATA

#----------------------------------------------------------------------

data_VESTA_phase_1


_pd_phase_name                         
_cell_length_a 16.1067867
_cell_length_b 16.1067867
_cell_length_c 14.55806160
_cell_angle_alpha                      90
_cell_angle_beta                       90
_cell_angle_gamma                      120
_symmetry_space_group_name_H-M         'P1'
_symmetry_Int_Tables_number            1

loop_
_symmetry_equiv_pos_as_xyz
   'x, y, z'

loop_
   _atom_site_label
   _atom_site_fract_x
   _atom_site_fract_y
   _atom_site_fract_z
Na       0.001374976  -0.000913384   0.138218024
Na       0.000452560   0.000271766   0.638011193
Na       0.669147958   0.335892824   0.304472897
Na       0.667518750   0.333672661   0.805480374
Na       0.331173559   0.666513197   0.471295697
Na       0.333039579   0.667695484   0.972443288
Mg       0.126615284   0.063880086   0.323667952
Mg       0.126491914   0.062775523   0.823387621
Mg       0.936590665   0.063245894   0.322900309
Mg       0.936522304   0.063166964   0.823249266
Mg       0.937583154   0.873511246   0.323074052
Mg       0.936123457   0.873212802   0.821449250
Mg       0.793603593   0.396916034   0.489801932
Mg       0.793656427   0.397285735   0.990419227
Mg       0.603565660   0.396830149   0.489600312
Mg       0.603181659   0.396563525   0.989863777
Mg       0.603328328   0.206839523   0.489427448
Mg       0.603657217   0.207194519   0.990411097
Mg       0.460112575   0.730251805   0.156496147
Mg       0.459709922   0.729929975   0.656413519
Mg       0.268826404   0.729339161   0.156128917
Mg       0.270053904   0.730081619   0.656845696
Mg       0.269814952   0.540515074   0.156860837
Mg       0.269961950   0.539949317   0.656672254
Al       0.298271191   0.261586457   0.316288247
Al       0.298352232   0.261377783   0.816336488
Al       0.738218609   0.036794071   0.316295168
Al       0.738027395   0.036872262   0.816264492
Al       0.964962264   0.702065692   0.317581980
Al       0.962834610   0.701290491   0.815775964
Al       0.739094600   0.702041911   0.316365065
Al       0.737988360   0.701307106   0.815848641
Al       0.963450656   0.262185873   0.316450074
Al       0.963168325   0.261613645   0.816636590
Al       0.298290150   0.036205093   0.316160171
Al       0.298730674   0.036667226   0.816586823
Al       0.965745648   0.595486482   0.483576241
Al       0.965428326   0.595877780   0.983408282
Al       0.405076008   0.370172115   0.482727138
Al       0.404633344   0.369757915   0.983049963
Al       0.629829236   0.034880979   0.482850305
Al       0.629953765   0.035053122   0.983186415
Al       0.404700911   0.034889314   0.483071332
Al       0.405391062   0.035571771   0.983849357
Al       0.629984775   0.595301055   0.482614699
Al       0.629883754   0.595013638   0.982776775
Al       0.965268723   0.370393755   0.482971819
Al       0.964842268   0.370143420   0.983134090
Al       0.632134184   0.928555289   0.149656723
Al       0.631580695   0.928434610   0.649576933
Mg       0.072996905   0.703931435   0.149078939
Al       0.071878787   0.703687156   0.649802981
Al       0.295982879   0.367881444   0.149604675
Al       0.296492379   0.368100702   0.649593919
Al       0.071540366   0.368710898   0.149869114
Al       0.071467051   0.367894290   0.649604449
Al       0.296776811   0.927709795   0.149827137
Al       0.296458307   0.928274411   0.649698485
Al       0.632386340   0.703623011   0.149559238
Al       0.631510724   0.703390358   0.649368447
Si       0.192163623   0.189751375   0.008178279
Si       0.192551746   0.190779069   0.508376579
Si       0.808939922   0.002040646   0.007856937
Si       0.809192501   0.002002049   0.508211718
Si       0.997002010   0.806227480   0.005215617
Si       0.997519413   0.807460370   0.509845002
Si       0.808995171   0.807961009   0.006967764
Si       0.809240107   0.807638455   0.508576241
Si       0.998050765   0.190258337   0.008255185
Si       0.998048303   0.190696568   0.508149272
Si       0.192654340   0.000743563   0.008056174
Si       0.192398200   0.001875713   0.508629387
Si       0.857542944   0.523191911   0.176544090
Si       0.859286264   0.523917545   0.675024035
Si       0.474950447   0.334975647   0.174729599
Si       0.475882740   0.335244194   0.674712059
Si       0.664690018   0.140442769   0.174998021
Si       0.664674097   0.140835219   0.674732246
Si       0.476394739   0.141467169   0.175079684
Si       0.475935466   0.140795073   0.674798476
Si       0.663044808   0.523370093   0.174759650
Si       0.664572104   0.523976322   0.674688715
Si       0.858912241   0.334684413   0.175023732
Si       0.859266872   0.335222846   0.674942452
Si       0.526127864   0.857383513   0.341641094
Si       0.525804046   0.857348209   0.841492212
Si       0.144600180   0.667948634   0.343754661
Si       0.142007360   0.668572641   0.841339644
Si       0.331749914   0.474022172   0.341323261
Si       0.331119201   0.473778869   0.841484948
Si       0.143063286   0.474309803   0.342785255
Si       0.142300528   0.473738035   0.841276524
Si       0.331482107   0.857072894   0.342881365
Si       0.331322751   0.857358950   0.841652880
Si       0.526032355   0.668551648   0.341196180
Si       0.525579395   0.668371024   0.841293584
B        0.109809255   0.220543420   0.237296511
B        0.110046185   0.220117920   0.737097859
B        0.779921009   0.890036804   0.236917638
B        0.779231295   0.889829503   0.736515827
B        0.110132375   0.890516988   0.241084197
B        0.110193556   0.889978987   0.736504581
B        0.777743032   0.554730258   0.405464800
B        0.776367369   0.553267466   0.902738690
B        0.446439846   0.223199630   0.403597764
B        0.446591866   0.223261704   0.903453809
B        0.776866065   0.223257491   0.403698572
B        0.776733928   0.223091212   0.903816889
B        0.444534785   0.888029076   0.070806910
B        0.443469324   0.887135198   0.570455160
B        0.113820706   0.555722393   0.065718267
B        0.112949784   0.556391887   0.570938844
B        0.443608043   0.556446155   0.070386802
B        0.443325074   0.556538537   0.570090898
O       -0.000255584   0.000683216   0.397505398
O       -0.000626554  -0.000457669   0.896228346
O        0.666388349   0.333379827   0.063653699
O        0.666541725   0.333210870   0.563562065
O        0.335346621   0.666774599   0.229882115
O        0.333595447   0.666602410   0.730459725
O        0.061760933   0.124259616   0.249436040
O        0.061968002   0.123773065   0.749331568
O        0.876222795   0.938127138   0.249061205
O        0.875646923   0.938234083   0.748315312
O        0.063139492   0.941048206   0.249768242
O        0.062343506   0.938626897   0.748077311
O        0.729186915   0.458014175   0.416624827
O        0.727806089   0.456919647   0.915771149
O        0.542921075   0.271621180   0.415561722
O        0.542957805   0.271608544   0.915559343
O        0.728706729   0.271489483   0.415849937
O        0.728675879   0.271352088   0.916121978
O        0.396099072   0.791709641   0.082652189
O        0.395313236   0.790784750   0.582741779
O        0.210417334   0.603121650   0.080622569
O        0.209263096   0.604474748   0.583610880
O        0.395599612   0.604658055   0.082484639
O        0.395054774   0.604637815   0.582319140
O        0.270540465   0.135680489   0.266968938
O        0.270559651   0.135261834   0.766179166
O        0.864737386   0.135283630   0.266582589
O        0.864621156   0.135132937   0.766175970
O        0.863893468   0.730252066   0.267712500
O        0.863667039   0.729353684   0.764907233
O        0.937018859   0.468243431   0.433271745
O        0.934328851   0.465957266   0.931881929
O        0.531509348   0.468507749   0.432825701
O        0.530943045   0.468197505   0.932822202
O        0.531576367   0.063038491   0.433094620
O        0.531856673   0.063398912   0.933212105
O        0.604144211   0.802002920   0.099663840
O        0.603422192   0.801931618   0.599432406
O        0.208591376   0.807736266   0.097239999
O        0.198723701   0.802222329   0.599368816
O        0.198151835   0.395852144   0.100213969
O        0.198198110   0.396082856   0.599468955
O        0.092035957   0.183821434   0.042845450
O        0.091698027   0.183581601   0.543114703
O        0.812557306   0.906798866   0.042166852
O        0.816007873   0.908352990   0.543341490
O        0.092866619   0.905479910   0.040719869
O        0.091626973   0.908592834   0.543926907
O        0.753353362   0.511057508   0.208899487
O        0.758054161   0.516455310   0.709138088
O        0.483674380   0.242422798   0.209978799
O        0.483194405   0.241690928   0.709375671
O        0.759401670   0.239622405   0.210031443
O        0.758314881   0.241549791   0.709509287
O        0.426176190   0.851049707   0.377355312
O        0.424987320   0.850008428   0.876164174
O        0.150925966   0.573926033   0.382062788
O        0.149978067   0.574901745   0.874515418
O        0.425500296   0.574706283   0.376179505
O        0.424747782   0.574733836   0.875896643
O        0.184472353   0.091421817   0.053336105
O        0.186967708   0.093726818   0.554232776
O        0.907056668   0.092205553   0.053504847
O        0.906509808   0.093476328   0.553918052
O        0.908885964   0.819063263   0.050604597
O        0.906008133   0.813451094   0.555767282
O        0.850121280   0.423995802   0.220834707
O        0.853333703   0.426527868   0.720919909
O        0.569878891   0.428020830   0.220890904
O        0.572979323   0.426811233   0.720426809
O        0.573821648   0.147262806   0.220642099
O        0.573228157   0.146609137   0.720464660
O        0.520725052   0.760188992   0.387159196
O        0.520235158   0.760087155   0.886912195
O        0.241594045   0.760342219   0.391262081
O        0.239753612   0.760019733   0.886765649
O        0.240043987   0.478470663   0.387772267
O        0.239492374   0.479222138   0.886927118
O        0.198776338   0.189984402   0.397841029
O        0.198877484   0.189127295   0.897507264
O        0.810440318   0.009505508   0.397670971
O        0.810299421   0.009752920   0.897244895
O        0.988721611   0.801101207   0.399939269
O        0.989941471   0.802394862   0.894205884
O        0.810292589   0.801953185   0.398065231
O        0.809180521   0.801333042   0.896267948
O        0.990549921   0.189520571   0.397649153
O        0.990644738   0.189238900   0.897535582
O        0.199019333   0.009782767   0.398189820
O        0.199485367   0.009692124   0.897353517
O        0.865621284   0.521735605   0.065713215
O        0.865797148   0.522120818   0.564657460
O        0.476490886   0.341859296   0.064051113
O        0.477136982   0.342711893   0.564133533
O        0.657138749   0.134503401   0.064407362
O        0.657221675   0.134539194   0.564169532
O        0.477789895   0.136169086   0.064363919
O        0.477197798   0.134652083   0.564218736
O        0.655985022   0.522336714   0.064081032
O        0.656928869   0.522859131   0.564163157
O        0.865065813   0.341521105   0.064424908
O        0.865459609   0.342427866   0.564369892
O        0.532810612   0.856277470   0.231108954
O        0.532072512   0.856241823   0.730851453
O        0.150225905   0.672508345   0.234910749
O        0.144468048   0.676854017   0.730624790
O        0.324407576   0.467771360   0.230787751
O        0.324049753   0.467609178   0.730822604
O        0.144131374   0.467929987   0.232136899
O        0.143812701   0.466962847   0.730720741
O        0.325754290   0.857142759   0.232534828
O        0.324551231   0.856679876   0.730975337
O        0.532647749   0.676013227   0.230662747
O        0.531873923   0.675859607   0.730657484
O        0.284394792   0.285588486   0.049966523
O        0.284734917   0.286469776   0.550129805
O        0.714182495  -0.000214504   0.050152406
O        0.713603155  -0.001416365   0.550170401
O        0.993346868   0.711326277   0.044255806
O        1.001823235   0.715627753   0.551302508
O        0.714280046   0.715077493   0.049657502
O        0.713344743   0.715369249   0.550113437
O        1.000777087   0.285132816   0.050509914
O        1.001573381   0.286227808   0.550242891
O        0.286475518   0.000691582   0.050084534
O        0.284682044  -0.001387595   0.550590497
O        0.944323495   0.616466996   0.223372367
O        0.951184180   0.619823287   0.716201434
O        0.378821039   0.330484577   0.216211556
O        0.380159373   0.331516579   0.716618038
O        0.667706775   0.048068623   0.216961021
O        0.668126774   0.048707125   0.716649924
O        0.381136526   0.049501473   0.217211263
O        0.380421107   0.048768542   0.716800229
O        0.668981307   0.620226975   0.216419754
O        0.667832174   0.619526869   0.716458075
O        0.951557118   0.332172394   0.217162594
O        0.951199468   0.331383269   0.716808138
O        0.618390749   0.953097435   0.383583417
O        0.617933014   0.953020869   0.883310719
O        0.048368880   0.664471146   0.385615609
O        0.045806647   0.664808193   0.880837366
O        0.335554993   0.381951375   0.383175336
O        0.334809430   0.381707562   0.883312595
O        0.046958465   0.381629974   0.383889510
O        0.046702902   0.381533243   0.883115771
O        0.335117022   0.953156074   0.384399157
O        0.335386285   0.953167647   0.883781286
O        0.618108903   0.664977078   0.383222944
O        0.617539171   0.664655244   0.883103294
O        0.209992785   0.271536778   0.231744362
O        0.210317907   0.271291343   0.731407674
O        0.729025913   0.939474578   0.231285954
O        0.728156626   0.939021824   0.731285528
O        0.061706045   0.792308317   0.241330271
O        0.060928266   0.789939502   0.730452197
O        0.728523684   0.789878257   0.231434280
O        0.728088147   0.789618995   0.730796085
O        0.060693491   0.271578919   0.231638774
O        0.060752814   0.271018778   0.731299148
O        0.211163935   0.940466758   0.231941511
O        0.210603915   0.938964511   0.731574012
O        0.877619970   0.606319224   0.402034874
O        0.875912031   0.603481580   0.895603951
O        0.395288369   0.272316036   0.398121728
O        0.395298419   0.272265448   0.897809336
O        0.727580632   0.122976906   0.398139075
O        0.727234020   0.122811690   0.897863694
O        0.395388073   0.123029874   0.398285230
O        0.395841682   0.123139091   0.897682002
O        0.727725752   0.605070659   0.398550163
O        0.727089894   0.604508564   0.897612285
O        0.877046993   0.272254314   0.398341697
O        0.876843734   0.271639301   0.898050696
O        0.544926255   0.938029657   0.064619830
O        0.543767064   0.938173107   0.564769287
O        0.064146795   0.603329644   0.053439404
O        0.061870070   0.605450829   0.565774155
O        0.394310918   0.456014101   0.064673700
O        0.394332782   0.456267095   0.564635234
O        0.062604830   0.454357226   0.064138418
O        0.061830056   0.456043907   0.565165319
O        0.397859204   0.941284796   0.065646308
O        0.394564142   0.938424242   0.565041975
O        0.543931121   0.605746120   0.064544372
O        0.543557349   0.605777477   0.564435971
H       -0.001512212  -0.000104423   0.463333986
H       -0.001738586  -0.004861442   0.961956746
H        0.669329853   0.337409854   0.129388866
H        0.666447550   0.333185862   0.629418745
H        0.330534527   0.668550735   0.295396416
H        0.332590095   0.666423380   0.796313143
H        0.268936553   0.134344354   0.200216998
H        0.269208730   0.134473913   0.699406774
H        0.865187891   0.135099905   0.199811287
H        0.865426844   0.134696146   0.699405275
H        0.864874170   0.728523036   0.201056103
H        0.863990690   0.730468198   0.698126691
H        0.937075171   0.469024261   0.366473888
H        0.932048200   0.464730149   0.865164605
H        0.532078881   0.467791103   0.366007172
H        0.531517584   0.467452709   0.866058957
H        0.531621555   0.063669598   0.366303530
H        0.532370967   0.064777877   0.866456954
H        0.603139758   0.801601934   0.032899635
H        0.601947609   0.801184963   0.532640025
H        0.209718389   0.807397217   0.030664163
H        0.199835511   0.801086027   0.532540836
H        0.198452510   0.397663866   0.033460396
H        0.199094996   0.397693803   0.532672145
