# Supplementary material for: Theoretical OH stretching vibrations in dravite
Source: Copernicus journal article supplement (doi:10.5194/ejm-34-239-2022), 2022-04-13
Supplement: Supplementary file 3 [file ejm-34-239-2022-supplement.zip › ejm-2021-65-supplement-version2/supplementary_files/Structure_and_eigendisplacement_files/chemically_disordered_models_1x1x2_hexagonal_supercell/dravite_112_vacancy.cif]

#======================================================================

# CRYSTAL DATA

#----------------------------------------------------------------------

data_VESTA_phase_1


_pd_phase_name                         
_cell_length_a 16.1067867
_cell_length_b 16.1067867
_cell_length_c 14.55806160
_cell_angle_alpha                      90
_cell_angle_beta                       90
_cell_angle_gamma                      120
_symmetry_space_group_name_H-M         'P1'
_symmetry_Int_Tables_number            1

loop_
_symmetry_equiv_pos_as_xyz
   'x, y, z'

loop_
   _atom_site_label
   _atom_site_fract_x
   _atom_site_fract_y
   _atom_site_fract_z
Na       0.000000000   0.000000000   0.639389533
Na       0.666667000   0.333333000   0.304748365
Na       0.666667000   0.333333000   0.805090407
Na       0.333333000   0.666667000   0.471384269
Na       0.333333000   0.666667000   0.971407597
Mg       0.124921897   0.062460969   0.319058288
Mg       0.125921071   0.062960557   0.826210154
Mg       0.937539031   0.062460927   0.319058288
Mg       0.937039443   0.062960515   0.826210154
Mg       0.937539073   0.875078103   0.319058288
Mg       0.937039485   0.874078929   0.826210154
Mg       0.793372929   0.396685986   0.489736563
Mg       0.793422455   0.396710749   0.989765676
Mg       0.603314014   0.396685943   0.489736563
Mg       0.603289251   0.396710707   0.989765676
Mg       0.603314057   0.206627071   0.489736563
Mg       0.603289293   0.206577545   0.989765676
Mg       0.459831916   0.729916479   0.156209160
Mg       0.460179963   0.730090502   0.656243613
Mg       0.270083521   0.729916437   0.156209160
Mg       0.269909498   0.730090460   0.656243613
Mg       0.270083563   0.540168084   0.156209160
Mg       0.269909540   0.539820037   0.656243613
Al       0.298118933   0.261297787   0.315640239
Al       0.298061010   0.261223852   0.816838531
Al       0.738702213   0.036821146   0.315640239
Al       0.738776148   0.036837158   0.816838531
Al       0.963178854   0.701881067   0.315640239
Al       0.963162842   0.701938990   0.816838531
Al       0.738702345   0.701881126   0.315640240
Al       0.738776280   0.701939049   0.816838532
Al       0.963178780   0.261297655   0.315640240
Al       0.963162769   0.261223720   0.816838532
Al       0.298118874   0.036821220   0.315640240
Al       0.298060951   0.036837231   0.816838532
Al       0.965196670   0.595342342   0.482752713
Al       0.965309232   0.595506770   0.983435532
Al       0.404657658   0.369853328   0.482752713
Al       0.404493230   0.369801461   0.983435532
Al       0.630146672   0.034803330   0.482752713
Al       0.630198539   0.034690768   0.983435532
Al       0.404657790   0.034803389   0.482752715
Al       0.404493362   0.034690827   0.983435534
Al       0.630146599   0.595342210   0.482752715
Al       0.630198465   0.595506638   0.983435534
Al       0.965196611   0.369853401   0.482752715
Al       0.965309173   0.369801535   0.983435534
Al       0.631578128   0.928221723   0.149752229
Al       0.632416627   0.928679103   0.649625351
Al       0.071778277   0.703357405   0.149752229
Al       0.071320897   0.703738524   0.649625351
Al       0.296642595   0.368421872   0.149752229
Al       0.296261476   0.367583373   0.649625351
Al       0.071778409   0.368421931   0.149752231
Al       0.071321029   0.367583431   0.649625353
Al       0.296642522   0.928221591   0.149752231
Al       0.296261403   0.928678971   0.649625353
Al       0.631578069   0.703357478   0.149752231
Al       0.632416569   0.703738597   0.649625353
Si       0.192451488   0.190579856   0.009222172
Si       0.192524280   0.190327050   0.507506352
Si       0.809420144   0.001871632   0.009222172
Si       0.809672950   0.002197230   0.507506352
Si       0.998128368   0.807548512   0.009222172
Si       0.997802770   0.807475720   0.507506352
Si       0.809420665   0.807549086   0.009222325
Si       0.809673471   0.807476294   0.507506505
Si       0.998128421   0.190579335   0.009222325
Si       0.997802823   0.190326529   0.507506505
Si       0.192450914   0.001871579   0.009222325
Si       0.192523706   0.002197177   0.507506505
Si       0.859154360   0.523923320   0.174834996
Si       0.859364454   0.524187628   0.674760746
Si       0.476076680   0.335230040   0.174834996
Si       0.475812372   0.335175827   0.674760746
Si       0.664769960   0.140845640   0.174834996
Si       0.664824173   0.140635546   0.674760746
Si       0.476077202   0.140846214   0.174835148
Si       0.475812894   0.140636120   0.674760899
Si       0.664770012   0.523922798   0.174835148
Si       0.664824226   0.524187106   0.674760899
Si       0.859153786   0.335229988   0.174835148
Si       0.859363880   0.335175774   0.674760899
Si       0.525799722   0.857387028   0.341374756
Si       0.526073940   0.857452904   0.841258538
Si       0.142612972   0.668413693   0.341374756
Si       0.142547096   0.668622036   0.841258538
Si       0.331586307   0.474200278   0.341374756
Si       0.331377964   0.473926060   0.841258538
Si       0.142613493   0.474200852   0.341374909
Si       0.142547618   0.473926635   0.841258691
Si       0.331586360   0.857386507   0.341374909
Si       0.331378017   0.857452382   0.841258691
Si       0.525799148   0.668413640   0.341374909
Si       0.526073365   0.668621983   0.841258691
B        0.110912518   0.221824552   0.238228366
B        0.109942690   0.219884897   0.737816541
B        0.778175448   0.889087966   0.238228366
B        0.780115103   0.890057793   0.737816541
B        0.110912034   0.889087482   0.238228366
B        0.109942207   0.890057310   0.737816541
B        0.776790824   0.553580165   0.403449094
B        0.776813629   0.553625774   0.903732988
B        0.446419835   0.223209659   0.403449094
B        0.446374226   0.223186855   0.903732988
B        0.776790341   0.223209176   0.403449094
B        0.776813145   0.223186371   0.903732988
B        0.443406722   0.886813959   0.070232283
B        0.443622001   0.887244517   0.570439558
B        0.113186041   0.556593762   0.070232283
B        0.112755483   0.556378483   0.570439558
B        0.443406238   0.556593278   0.070232283
B        0.443621517   0.556377999   0.570439558
O        0.000000000   0.000000000   0.396547097
O        0.000000000   0.000000000   0.901538694
O        0.666667000   0.333333000   0.063419627
O        0.666667000   0.333333000   0.563604199
O        0.333333000   0.666667000   0.229931374
O        0.333333000   0.666667000   0.729912924
O        0.063728744   0.127457535   0.252722510
O        0.061826280   0.123652606   0.750877479
O        0.872542465   0.936271209   0.252722510
O        0.876347394   0.938173674   0.750877479
O        0.063728791   0.936271256   0.252722510
O        0.061826326   0.938173720   0.750877479
O        0.728572981   0.457145008   0.415862980
O        0.728584015   0.457167076   0.915723925
O        0.542854992   0.271426973   0.415862980
O        0.542832924   0.271415939   0.915723925
O        0.728573027   0.271427019   0.415862980
O        0.728584061   0.271415985   0.915723925
O        0.395173312   0.790347670   0.081896155
O        0.395388592   0.790778230   0.582495236
O        0.209652330   0.604826642   0.081896155
O        0.209221770   0.604611362   0.582495236
O        0.395173358   0.604826688   0.081896155
O        0.395388638   0.604611408   0.582495236
O        0.270674438   0.135337159   0.265002658
O        0.270200391   0.135100136   0.766800173
O        0.864662841   0.135337278   0.265002658
O        0.864899864   0.135100255   0.766800173
O        0.864662722   0.729325562   0.265002658
O        0.864899745   0.729799609   0.766800173
O        0.937038137   0.468518509   0.433127655
O        0.937225598   0.468612239   0.933331343
O        0.531481491   0.468518628   0.433127655
O        0.531387761   0.468612359   0.933331343
O        0.531481372   0.062961863   0.433127655
O        0.531387641   0.062774402   0.933331343
O        0.602861442   0.801431162   0.099971327
O        0.603995568   0.801998224   0.599577313
O        0.198568838   0.801431281   0.099971327
O        0.198001776   0.801998343   0.599577313
O        0.198568719   0.397138558   0.099971327
O        0.198001657   0.396004432   0.599577313
O        0.093837815   0.187676192   0.042596457
O        0.091761493   0.183523548   0.542052560
O        0.812323808   0.906161624   0.042596457
O        0.816476452   0.908237945   0.542052560
O        0.093838376   0.906162185   0.042596457
O        0.091762055   0.908238507   0.542052560
O        0.758354131   0.516707823   0.209529238
O        0.758222796   0.516445152   0.709371647
O        0.483292177   0.241645308   0.209529238
O        0.483554848   0.241776643   0.709371647
O        0.758354692   0.241645869   0.209529238
O        0.758223357   0.241777204   0.709371647
O        0.424866577   0.849734715   0.376719885
O        0.424928967   0.849859495   0.875482110
O        0.150265285   0.575132862   0.376719885
O        0.150140505   0.575070472   0.875482110
O        0.424867138   0.575133423   0.376719885
O        0.424929528   0.575071033   0.875482110
O        0.191310587   0.095655081   0.053633533
O        0.186838357   0.093418967   0.554172769
O        0.904344919   0.095655505   0.053633533
O        0.906581033   0.093419391   0.554172769
O        0.904344495   0.808689413   0.053633533
O        0.906580609   0.813161643   0.554172769
O        0.852905676   0.426452126   0.220527345
O        0.853903534   0.426951055   0.720254010
O        0.573547874   0.426452550   0.220527345
O        0.573048945   0.426951479   0.720254010
O        0.573547450   0.147094324   0.220527345
O        0.573048521   0.146096466   0.720254010
O        0.520523613   0.760262095   0.386916700
O        0.520278857   0.760139716   0.886794432
O        0.239737905   0.760262519   0.386916700
O        0.239860284   0.760140140   0.886794432
O        0.239737481   0.479476387   0.386916700
O        0.239859860   0.479721143   0.886794432
O        0.199887394   0.189262877   0.397319566
O        0.199164203   0.189980047   0.898164901
O        0.810737123   0.010624517   0.397319566
O        0.810019953   0.009184156   0.898164901
O        0.989375483   0.800112606   0.397319566
O        0.990815844   0.800835797   0.898164901
O        0.810737034   0.800112531   0.397319489
O        0.810019864   0.800835722   0.898164824
O        0.989375496   0.189262966   0.397319489
O        0.990815857   0.189980136   0.898164824
O        0.199887469   0.010624504   0.397319489
O        0.199164278   0.009184143   0.898164824
O        0.865353344   0.522649574   0.064234832
O        0.865550640   0.523030693   0.564156516
O        0.477350426   0.342702770   0.064234832
O        0.476969307   0.342518947   0.564156516
O        0.657297230   0.134646656   0.064234832
O        0.657481053   0.134449360   0.564156516
O        0.477350337   0.134646580   0.064234755
O        0.476969218   0.134449284   0.564156439
O        0.657297242   0.522649663   0.064234755
O        0.657481066   0.523030782   0.564156439
O        0.865353420   0.342702758   0.064234755
O        0.865550716   0.342518934   0.564156439
O        0.531071600   0.856091283   0.230748441
O        0.532568115   0.856305174   0.730659819
O        0.143908717   0.674981317   0.230748441
O        0.143694826   0.676263941   0.730659819
O        0.325018683   0.468928400   0.230748441
O        0.323736059   0.467431885   0.730659819
O        0.143908628   0.468928324   0.230748363
O        0.143694737   0.467431810   0.730659741
O        0.325018696   0.856091372   0.230748363
O        0.323736072   0.856305263   0.730659741
O        0.531071676   0.674981304   0.230748363
O        0.532568190   0.676263928   0.730659741
O        0.285251548   0.287174486   0.050099402
O        0.284482834   0.286226102   0.549922507
O        0.712825514  -0.001922938   0.050099402
O        0.713773898  -0.001743268   0.549922507
O        1.001922938   0.714748452   0.050099402
O        1.001743268   0.715517166   0.549922507
O        0.712825253   0.714748204   0.050099506
O        0.713773638   0.715516918   0.549922611
O        1.001922950   0.287174747   0.050099506
O        1.001743280   0.286226362   0.549922611
O        0.285251796  -0.001922950   0.050099506
O        0.284483082  -0.001743280   0.549922611
O        0.951334862   0.619071467   0.216851726
O        0.951216850   0.619955612   0.716741928
O        0.380928533   0.332262394   0.216851726
O        0.380044388   0.331260238   0.716741928
O        0.667737606   0.048665138   0.216851726
O        0.668739762   0.048783150   0.716741928
O        0.380928272   0.048664889   0.216851831
O        0.380044127   0.048782901   0.716742033
O        0.667737618   0.619071728   0.216851831
O        0.668739774   0.619955873   0.716742033
O        0.951335111   0.332262382   0.216851831
O        0.951217099   0.331260226   0.716742033
O        0.617672386   0.953073985   0.383413204
O        0.617832268   0.953153545   0.883230380
O        0.046926015   0.664599400   0.383413204
O        0.046846455   0.664679723   0.883230380
O        0.335400600   0.382327614   0.383413204
O        0.335320277   0.382167732   0.883230380
O        0.046925754   0.382327366   0.383413308
O        0.046846194   0.382167484   0.883230484
O        0.335400612   0.953074246   0.383413308
O        0.335320289   0.953153806   0.883230484
O        0.617672634   0.664599388   0.383413308
O        0.617832516   0.664679711   0.883230484
O        0.211700779   0.273638823   0.231926995
O        0.210195063   0.271036291   0.731523642
O        0.726361177   0.938061955   0.231926995
O        0.728963709   0.939158772   0.731523642
O        0.061938045   0.788299221   0.231926995
O        0.060841228   0.789804937   0.731523642
O        0.726360996   0.788298842   0.231926976
O        0.728963528   0.789804558   0.731523623
O        0.061937847   0.273639004   0.231926976
O        0.060841030   0.271036472   0.731523623
O        0.211701158   0.938062153   0.231926976
O        0.210195442   0.939158970   0.731523623
O        0.876969390   0.604450238   0.397707484
O        0.876996034   0.604514955   0.898031887
O        0.395549762   0.272518151   0.397707484
O        0.395485045   0.272480079   0.898031887
O        0.727481849   0.123030610   0.397707484
O        0.727519921   0.123003966   0.898031887
O        0.395549580   0.123030231   0.397707465
O        0.395484864   0.123003587   0.898031867
O        0.727481650   0.604450420   0.397707465
O        0.727519723   0.604515136   0.898031867
O        0.876969769   0.272518350   0.397707465
O        0.876996413   0.272480277   0.898031867
O        0.543513851   0.937901434   0.064729067
O        0.543868957   0.938246960   0.564886487
O        0.062098566   0.605613417   0.064729067
O        0.061753040   0.605622997   0.564886487
O        0.394386583   0.456486149   0.064729067
O        0.394377003   0.456131043   0.564886487
O        0.062098384   0.456485769   0.064729047
O        0.061752859   0.456130664   0.564886468
O        0.394386385   0.937901616   0.064729047
O        0.394376805   0.938247141   0.564886468
O        0.543514231   0.605613615   0.064729047
O        0.543869336   0.605623195   0.564886468
H        0.000000000   0.000000000   0.462356450
H        0.000000000   0.000000000   0.967856444
H        0.666667000   0.333333000   0.129274653
H        0.666667000   0.333333000   0.629458584
H        0.333333000   0.666667000   0.295777985
H        0.333333000   0.666667000   0.795773136
H        0.267256622   0.133628323   0.198195476
H        0.267815383   0.133907703   0.700043044
H        0.866371677   0.133628299   0.198195476
H        0.866092297   0.133907680   0.700043044
H        0.866371701   0.732743378   0.198195476
H        0.866092320   0.732184617   0.700043044
H        0.936065086   0.468032055   0.366344227
H        0.936493594   0.468246309   0.866568384
H        0.531967945   0.468032031   0.366344227
H        0.531753691   0.468246285   0.866568384
H        0.531967969   0.063934914   0.366344227
H        0.531753715   0.063506406   0.866568384
H        0.603687858   0.801844441   0.033220507
H        0.603468860   0.801734942   0.532790905
H        0.198155559   0.801844418   0.033220507
H        0.198265058   0.801734918   0.532790905
H        0.198155582   0.396312142   0.033220507
H        0.198265082   0.396531140   0.532790905
