# Supplementary material for: Theoretical OH stretching vibrations in dravite
Source: Copernicus journal article supplement (doi:10.5194/ejm-34-239-2022), 2022-04-13
Supplement: Supplementary file 3 [file ejm-34-239-2022-supplement.zip › ejm-2021-65-supplement-version2/supplementary_files/Structure_and_eigendisplacement_files/chemically_disordered_models_1x1x2_hexagonal_supercell/read_me.txt]

The .cif files report the structure of disordered dravite models computed for an hexagonal 1x1x2 supercell. 

For the models displaying both X vacancy and Al for Mg substitution at the Y sites, two configurations have been considered. One with the W(OH) group pointing to the vacant site (conf1) and another one with the vacant site on the opposite side of the cluster (conf2).
