# Supplementary material for: Theoretical OH stretching vibrations in dravite
Source: Copernicus journal article supplement (doi:10.5194/ejm-34-239-2022), 2022-04-13
Supplement: Supplementary file 3 [file ejm-34-239-2022-supplement.zip › ejm-2021-65-supplement-version2/supplementary_files/Structure_and_eigendisplacement_files/chemically_disordered_models_simple_hexagonal_cell/dravite_2Al_vacancy.cif]

#======================================================================

# CRYSTAL DATA

#----------------------------------------------------------------------

data_VESTA_phase_1


_pd_phase_name                         
_cell_length_a 16.1067867
_cell_length_b 16.1067867
_cell_length_c 7.27903080
_cell_angle_alpha                      90
_cell_angle_beta                       90
_cell_angle_gamma                      120
_symmetry_space_group_name_H-M         'P1'
_symmetry_Int_Tables_number            1

loop_
_symmetry_equiv_pos_as_xyz
   'x, y, z'

loop_
   _atom_site_label
   _atom_site_fract_x
   _atom_site_fract_y
   _atom_site_fract_z
Na      -0.000979631  -0.000490711   0.275623895
Na       0.666278779   0.333139210   0.610061156
Mg       0.126704653   0.063352028   0.644243990
Mg       0.936559586   0.063386149   0.645277748
Mg       0.936559581   0.873173012   0.645279100
Mg       0.793464098   0.396731736   0.978174421
Mg       0.603421455   0.396893122   0.979146969
Mg       0.603421456   0.206527581   0.979146667
Mg       0.460148241   0.730073754   0.309120915
Al       0.269696725   0.730182442   0.319768403
Al       0.269696740   0.539513565   0.319768274
Al       0.298843871   0.261994496   0.631986523
Al       0.737587567   0.036531976   0.632998646
Al       0.962735323   0.701185884   0.630615973
Al       0.737587593   0.701055004   0.632998858
Al       0.962735331   0.261548920   0.630615511
Al       0.298843822   0.036848633   0.631986768
Al       0.965734775   0.595086032   0.962513016
Al       0.405140554   0.369927451   0.964618257
Al       0.628227206   0.032751689   0.965964722
Al       0.405140526   0.035212365   0.964618378
Al       0.628227212   0.595474862   0.965964857
Al       0.965734790   0.370648200   0.962512676
Al       0.630666910   0.926995393   0.301064136
Al       0.070954123   0.702018361   0.298366648
Al       0.298613198   0.368782642   0.299541270
Al       0.070954133   0.368935149   0.298366238
Al       0.298613154   0.929829827   0.299541414
Al       0.630666880   0.703670791   0.301064345
Si       0.192360209   0.190962753   0.014531375
Si       0.808558485   0.001817037   0.016246912
Si       0.998201054   0.806844653   0.014646694
Si       0.808558468   0.806740877   0.016247324
Si       0.998201119   0.191355920   0.014645949
Si       0.192360100   0.001396683   0.014531614
Si       0.859685430   0.524156585   0.347573604
Si       0.476095031   0.335251311   0.349282439
Si       0.664659972   0.140181846   0.348955086
Si       0.476095064   0.140842917   0.349282560
Si       0.664659927   0.524477463   0.348955221
Si       0.859685435   0.335528317   0.347573424
Si       0.525861769   0.856569297   0.685572263
Si       0.144362055   0.669475378   0.686422416
Si       0.331150068   0.475302084   0.688219979
Si       0.144362067   0.474886067   0.686422184
Si       0.331150061   0.855847301   0.688220085
Si       0.525861734   0.669291791   0.685572374
B        0.110820915   0.221508787   0.471213387
B        0.779441822   0.889720584   0.474157714
B        0.110820927   0.889311488   0.471214046
B        0.776707454   0.553759454   0.807064634
B        0.446403535   0.223201443   0.806885308
B        0.776707463   0.222947427   0.807064324
B        0.439798597   0.884860411   0.148789157
B        0.114991064   0.557495227   0.148632072
B        0.439798610   0.554937482   0.148789074
O        0.000567248   0.000283574   0.791113759
O        0.667225993   0.333612496   0.126846106
O        0.322784319   0.661391714   0.459897239
O        0.062666769   0.125370924   0.496181012
O        0.875964990   0.937982162   0.497451803
O        0.062666714   0.937295129   0.496181996
O        0.728815560   0.457372991   0.831641511
O        0.542665609   0.271332498   0.831444167
O        0.728815607   0.271442031   0.831641187
O        0.385644457   0.788776770   0.190928985
O        0.211658690   0.605829021   0.196231419
O        0.385644457   0.596866974   0.190928810
O        0.270675921   0.135337561   0.530255061
O        0.865186902   0.135930275   0.530575769
O        0.865187006   0.729256264   0.530576254
O        0.938554220   0.469276864   0.864456813
O        0.530534442   0.468575753   0.866437590
O        0.530534468   0.061958049   0.866437459
O        0.601761534   0.800880369   0.199141773
O        0.205659620   0.793820969   0.197273681
O        0.205659602   0.411837995   0.197273432
O        0.092241764   0.185095043   0.085145606
O        0.816704780   0.908352137   0.085031447
O        0.092241676   0.907146127   0.085146599
O        0.761141530   0.521731716   0.414876660
O        0.477873721   0.238936463   0.419386658
O        0.761141520   0.239409275   0.414876434
O        0.426178161   0.852120339   0.753255847
O        0.148030079   0.574014717   0.751028393
O        0.426178084   0.574057185   0.753255972
O        0.186754505   0.093376927   0.104504702
O        0.906091128   0.094497653   0.106141854
O        0.906091065   0.811592933   0.106142650
O        0.849730511   0.424864977   0.438183686
O        0.575562916   0.424607567   0.439278015
O        0.575562995   0.150954677   0.439278189
O        0.523324951   0.761662155   0.777022323
O        0.238232430   0.761474733   0.781071977
O        0.238232483   0.476757171   0.781071728
O        0.199044014   0.190273665   0.793060583
O        0.810304038   0.009792431   0.794856272
O        0.991414315   0.800678267   0.793166620
O        0.810303995   0.800510950   0.794856694
O        0.991414424   0.190735499   0.793165839
O        0.199043801   0.008769253   0.793060786
O        0.868092579   0.523629510   0.126617366
O        0.476291452   0.342251152   0.128053028
O        0.654815644   0.131561598   0.128102371
O        0.476291550   0.134039398   0.128053169
O        0.654815579   0.523253328   0.128102508
O        0.868092658   0.344462564   0.126617192
O        0.530555343   0.854391287   0.463329340
O        0.151738477   0.679755731   0.461163234
O        0.318920468   0.471572458   0.463439577
O        0.151738477   0.471982046   0.461163038
O        0.318920404   0.847347228   0.463439711
O        0.530555262   0.676163291   0.463329435
O        0.283967689   0.287173168   0.099504455
O        0.711995966  -0.002994872   0.100662612
O        1.003970482   0.715336905   0.098106308
O        0.711995978   0.714990185   0.100662898
O        1.003970547   0.288633057   0.098105733
O        0.283967613  -0.003206260   0.099504594
O        0.954150020   0.618228551   0.432652932
O        0.381930487   0.335571773   0.434452075
O        0.665711782   0.047027881   0.434311615
O        0.381930510   0.046357942   0.434452272
O        0.665711721   0.618683211   0.434311862
O        0.954150048   0.335920944   0.432652624
O        0.618007400   0.953108980   0.766956334
O        0.047119998   0.664560278   0.762324688
O        0.335190630   0.382343468   0.764202107
O        0.047119977   0.382559100   0.762324289
O        0.335190656   0.952846484   0.764202225
O        0.618007380   0.664897782   0.766956509
O        0.211342231   0.273380241   0.459696035
O        0.728242433   0.938901680   0.462868053
O        0.062317695   0.788771990   0.458943468
O        0.728242392   0.789340092   0.462868276
O        0.062317624   0.273545010   0.458942773
O        0.211342229   0.937961395   0.459696175
O        0.877342805   0.604613099   0.794461136
O        0.395166876   0.272392196   0.795323417
O        0.727421202   0.122849193   0.796219931
O        0.395166807   0.122774015   0.795323690
O        0.727421206   0.604571429   0.796220153
O        0.877342815   0.272729135   0.794460835
O        0.539061133   0.930941318   0.128192134
O        0.066312953   0.607516974   0.128558511
O        0.393844500   0.455622213   0.132102393
O        0.066312999   0.458795392   0.128558220
O        0.393844481   0.938221565   0.132102544
O        0.539061150   0.608119086   0.128192246
H       -0.000131652  -0.000064258   0.922881982
H        0.667135223   0.333567049   0.258629751
H        0.325035930   0.662517471   0.593061828
H        0.269419138   0.134709104   0.396634145
H        0.865144508   0.134274776   0.396969942
H        0.865144799   0.730869666   0.396970435
H        0.938184546   0.469092094   0.730889092
H        0.530590537   0.469151139   0.732905263
H        0.530590512   0.061438678   0.732905134
H        0.601700217   0.800849675   0.065373718
H        0.207941638   0.792176708   0.063063744
H        0.207941699   0.415764367   0.063063506
