# Supplementary material for: Theoretical OH stretching vibrations in dravite
Source: Copernicus journal article supplement (doi:10.5194/ejm-34-239-2022), 2022-04-13
Supplement: Supplementary file 3 [file ejm-34-239-2022-supplement.zip › ejm-2021-65-supplement-version2/supplementary_files/Structure_and_eigendisplacement_files/chemically_disordered_models_simple_hexagonal_cell/dravite_2Al_vacancy.txt]

     freq (  480) =     106.457520 [THz] =    3551.040617 [cm-1]
 (  0.000000   0.000000    -0.000000   0.000000     0.000000   0.000000   )
 (  0.000000   0.000000    -0.000000   0.000000    -0.000000   0.000000   )
 (  0.000000   0.000000    -0.000000   0.000000    -0.000000   0.000000   )
 ( -0.000000   0.000000    -0.000000   0.000000     0.000000   0.000000   )
 (  0.000000   0.000000    -0.000000   0.000000    -0.000000   0.000000   )
 ( -0.000000   0.000000     0.000000   0.000000     0.000000   0.000000   )
 (  0.000000   0.000000     0.000000   0.000000    -0.000000   0.000000   )
 ( -0.000000   0.000000    -0.000000   0.000000     0.000000   0.000000   )
 ( -0.000000   0.000000     0.000000   0.000000    -0.000000   0.000000   )
 ( -0.000000   0.000000     0.000000   0.000000    -0.000000   0.000000   )
 ( -0.000000   0.000000     0.000000   0.000000     0.000000   0.000000   )
 (  0.000000   0.000000     0.000000   0.000000     0.000000   0.000000   )
 ( -0.000000   0.000000     0.000000   0.000000    -0.000000   0.000000   )
 ( -0.000000   0.000000     0.000000   0.000000    -0.000000   0.000000   )
 ( -0.000000   0.000000     0.000000   0.000000     0.000000   0.000000   )
 ( -0.000000   0.000000     0.000000   0.000000     0.000000   0.000000   )
 ( -0.000000   0.000000     0.000000   0.000000    -0.000000   0.000000   )
 ( -0.000000   0.000000    -0.000000   0.000000     0.000000   0.000000   )
 ( -0.000000   0.000000     0.000000   0.000000    -0.000000   0.000000   )
 ( -0.000000   0.000000    -0.000000   0.000000     0.000000   0.000000   )
 ( -0.000000   0.000000     0.000000   0.000000     0.000000   0.000000   )
 (  0.000000   0.000000    -0.000000   0.000000    -0.000000   0.000000   )
 (  0.000000   0.000000     0.000000   0.000000    -0.000000   0.000000   )
 ( -0.000000   0.000000     0.000000   0.000000    -0.000000   0.000000   )
 (  0.000000   0.000000     0.000000   0.000000    -0.000000   0.000000   )
 (  0.000000   0.000000    -0.000000   0.000000     0.000000   0.000000   )
 ( -0.000000   0.000000    -0.000000   0.000000     0.000000   0.000000   )
 ( -0.000000   0.000000    -0.000000   0.000000    -0.000000   0.000000   )
 (  0.000000   0.000000     0.000000   0.000000     0.000000   0.000000   )
 (  0.000000   0.000000    -0.000000   0.000000    -0.000000   0.000000   )
 ( -0.000000   0.000000    -0.000000   0.000000    -0.000000   0.000000   )
 (  0.000000   0.000000    -0.000000   0.000000     0.000000   0.000000   )
 (  0.000000   0.000000    -0.000000   0.000000     0.000000   0.000000   )
 (  0.000000   0.000000    -0.000000   0.000000    -0.000000   0.000000   )
 (  0.000000   0.000000    -0.000000   0.000000     0.000000   0.000000   )
 (  0.000000   0.000000     0.000000   0.000000    -0.000000   0.000000   )
 (  0.000000   0.000000    -0.000000   0.000000     0.000000   0.000000   )
 ( -0.000000   0.000000    -0.000000   0.000000    -0.000000   0.000000   )
 ( -0.000000   0.000000    -0.000000   0.000000    -0.000000   0.000000   )
 (  0.000000   0.000000     0.000000   0.000000     0.000000   0.000000   )
 ( -0.000000   0.000000     0.000000   0.000000     0.000000   0.000000   )
 (  0.000000   0.000000    -0.000000   0.000000    -0.000000   0.000000   )
 ( -0.000000   0.000000    -0.000000   0.000000    -0.000000   0.000000   )
 ( -0.000000   0.000000    -0.000000   0.000000     0.000000   0.000000   )
 (  0.000000   0.000000    -0.000000   0.000000     0.000000   0.000000   )
 (  0.000000   0.000000     0.000000   0.000000    -0.000000   0.000000   )
 ( -0.000000   0.000000    -0.000000   0.000000     0.000000   0.000000   )
 (  0.000000   0.000000    -0.000000   0.000000     0.000000   0.000000   )
 (  0.000000   0.000000    -0.000000   0.000000     0.000000   0.000000   )
 (  0.000000   0.000000    -0.000000   0.000000    -0.000000   0.000000   )
 ( -0.000000   0.000000    -0.000000   0.000000    -0.000000   0.000000   )
 ( -0.000000   0.000000     0.000000   0.000000    -0.000000   0.000000   )
 (  0.000000   0.000000     0.000000   0.000000     0.000000   0.000000   )
 ( -0.000000   0.000000    -0.000000   0.000000     0.000000   0.000000   )
 ( -0.000000   0.000000     0.000000   0.000000     0.000000   0.000000   )
 (  0.000000   0.000000     0.000000   0.000000    -0.000000   0.000000   )
 ( -0.000000   0.000000     0.000000   0.000000    -0.000000   0.000000   )
 (  0.000000   0.000000    -0.000000   0.000000    -0.000000   0.000000   )
 ( -0.000017   0.000000     0.000029   0.000000    -0.000000   0.000000   )
 ( -0.000000   0.000000     0.000000   0.000000    -0.000000   0.000000   )
 ( -0.000000   0.000000     0.000000   0.000000     0.000000   0.000000   )
 ( -0.000000   0.000000     0.000000   0.000000     0.000000   0.000000   )
 (  0.000000   0.000000    -0.000000   0.000000    -0.000000   0.000000   )
 (  0.000000   0.000000    -0.000000   0.000000    -0.000000   0.000000   )
 ( -0.000000   0.000000    -0.000000   0.000000     0.000000   0.000000   )
 (  0.000000   0.000000     0.000000   0.000000     0.000000   0.000000   )
 (  0.000000   0.000000    -0.000000   0.000000     0.000000   0.000000   )
 ( -0.000000   0.000000    -0.000000   0.000000    -0.000000   0.000000   )
 ( -0.000000   0.000000     0.000000   0.000000     0.000000   0.000000   )
 (  0.000000   0.000000     0.000000   0.000000    -0.000000   0.000000   )
 ( -0.000000   0.000000    -0.000000   0.000000     0.000000   0.000000   )
 ( -0.000000   0.000000     0.000000   0.000000    -0.000000   0.000000   )
 (  0.000000   0.000000     0.000000   0.000000     0.000000   0.000000   )
 ( -0.000000   0.000000    -0.000000   0.000000    -0.000000   0.000000   )
 (  0.000001   0.000000    -0.000002   0.000000     0.000000   0.000000   )
 (  0.001906   0.000000    -0.000787   0.000000    -0.044217   0.000000   )
 ( -0.000271   0.000000    -0.002044   0.000000     0.044217   0.000000   )
 ( -0.000000   0.000000     0.000000   0.000000     0.000000   0.000000   )
 ( -0.000000   0.000000     0.000000   0.000000    -0.000000   0.000000   )
 ( -0.000000   0.000000     0.000000   0.000000    -0.000000   0.000000   )
 ( -0.000000   0.000000    -0.000000   0.000000     0.000000   0.000000   )
 ( -0.000000   0.000000     0.000000   0.000000     0.000000   0.000000   )
 (  0.000000   0.000000    -0.000000   0.000000    -0.000000   0.000000   )
 ( -0.000000   0.000000    -0.000000   0.000000     0.000000   0.000000   )
 ( -0.000000   0.000000     0.000000   0.000000     0.000000   0.000000   )
 (  0.000000   0.000000     0.000000   0.000000    -0.000000   0.000000   )
 ( -0.000000   0.000000     0.000000   0.000000    -0.000000   0.000000   )
 (  0.000000   0.000000     0.000000   0.000000     0.000000   0.000000   )
 ( -0.000000   0.000000     0.000000   0.000000    -0.000000   0.000000   )
 (  0.000000   0.000000    -0.000000   0.000000     0.000000   0.000000   )
 ( -0.000000   0.000000    -0.000000   0.000000    -0.000000   0.000000   )
 (  0.000000   0.000000    -0.000000   0.000000     0.000000   0.000000   )
 ( -0.000000   0.000000     0.000000   0.000000     0.000000   0.000000   )
 ( -0.000000   0.000000     0.000000   0.000000     0.000000   0.000000   )
 ( -0.000000   0.000000     0.000000   0.000000    -0.000000   0.000000   )
 ( -0.000000   0.000000    -0.000000   0.000000     0.000000   0.000000   )
 ( -0.000000   0.000000     0.000000   0.000000     0.000000   0.000000   )
 (  0.000000   0.000000    -0.000000   0.000000    -0.000000   0.000000   )
 ( -0.000000   0.000000     0.000000   0.000000    -0.000000   0.000000   )
 ( -0.000000   0.000000    -0.000000   0.000000     0.000000   0.000000   )
 (  0.000000   0.000000    -0.000000   0.000000    -0.000000   0.000000   )
 ( -0.000000   0.000000    -0.000000   0.000000     0.000000   0.000000   )
 ( -0.000000   0.000000    -0.000000   0.000000     0.000000   0.000000   )
 (  0.000000   0.000000    -0.000000   0.000000    -0.000000   0.000000   )
 (  0.000000   0.000000     0.000000   0.000000    -0.000000   0.000000   )
 ( -0.000000   0.000000    -0.000000   0.000000     0.000000   0.000000   )
 (  0.000000   0.000000    -0.000000   0.000000    -0.000000   0.000000   )
 ( -0.000000   0.000000     0.000000   0.000000     0.000000   0.000000   )
 (  0.000000   0.000000    -0.000000   0.000000     0.000000   0.000000   )
 (  0.000000   0.000000    -0.000000   0.000000    -0.000000   0.000000   )
 ( -0.000000   0.000000    -0.000000   0.000000    -0.000000   0.000000   )
 (  0.000000   0.000000    -0.000000   0.000000     0.000000   0.000000   )
 (  0.000000   0.000000     0.000000   0.000000    -0.000000   0.000000   )
 ( -0.000000   0.000000     0.000000   0.000000     0.000000   0.000000   )
 (  0.000000   0.000000     0.000000   0.000000    -0.000000   0.000000   )
 ( -0.000000   0.000000    -0.000000   0.000000    -0.000000   0.000000   )
 ( -0.000000   0.000000     0.000000   0.000000     0.000000   0.000000   )
 (  0.000000   0.000000     0.000000   0.000000     0.000000   0.000000   )
 ( -0.000000   0.000000     0.000000   0.000000    -0.000000   0.000000   )
 ( -0.000000   0.000000    -0.000000   0.000000     0.000000   0.000000   )
 ( -0.000000   0.000000    -0.000000   0.000000    -0.000000   0.000000   )
 (  0.000000   0.000000    -0.000000   0.000000     0.000000   0.000000   )
 (  0.000000   0.000000     0.000000   0.000000     0.000000   0.000000   )
 ( -0.000000   0.000000    -0.000000   0.000000    -0.000000   0.000000   )
 (  0.000000   0.000000    -0.000000   0.000000    -0.000000   0.000000   )
 ( -0.000000   0.000000    -0.000000   0.000000    -0.000000   0.000000   )
 (  0.000000   0.000000     0.000000   0.000000     0.000000   0.000000   )
 (  0.000000   0.000000    -0.000000   0.000000    -0.000000   0.000000   )
 ( -0.000000   0.000000    -0.000000   0.000000    -0.000000   0.000000   )
 ( -0.000000   0.000000    -0.000000   0.000000     0.000000   0.000000   )
 (  0.000000   0.000000     0.000000   0.000000     0.000000   0.000000   )
 ( -0.000000   0.000000     0.000000   0.000000    -0.000000   0.000000   )
 ( -0.000000   0.000000     0.000000   0.000000     0.000000   0.000000   )
 ( -0.000000   0.000000    -0.000000   0.000000     0.000000   0.000000   )
 ( -0.000000   0.000000     0.000000   0.000000    -0.000000   0.000000   )
 (  0.000000   0.000000     0.000000   0.000000    -0.000000   0.000000   )
 ( -0.000000   0.000000     0.000000   0.000000     0.000000   0.000000   )
 (  0.000000   0.000000     0.000000   0.000000    -0.000000   0.000000   )
 (  0.000000   0.000000    -0.000000   0.000000     0.000000   0.000000   )
 ( -0.000000   0.000000    -0.000000   0.000000    -0.000000   0.000000   )
 (  0.000000   0.000000    -0.000000   0.000000    -0.000000   0.000000   )
 (  0.000000   0.000000    -0.000000   0.000000     0.000000   0.000000   )
 ( -0.000000   0.000000    -0.000000   0.000000     0.000000   0.000000   )
 (  0.000000   0.000000     0.000000   0.000000    -0.000000   0.000000   )
 (  0.000000   0.000000    -0.000000   0.000000    -0.000000   0.000000   )
 ( -0.000000   0.000000    -0.000000   0.000000     0.000000   0.000000   )
 (  0.000000   0.000000    -0.000000   0.000000     0.000000   0.000000   )
 (  0.000000   0.000000     0.000000   0.000000    -0.000000   0.000000   )
 ( -0.000000   0.000000    -0.000000   0.000000     0.000000   0.000000   )
 (  0.000000   0.000000    -0.000000   0.000000    -0.000000   0.000000   )
 ( -0.000000   0.000000     0.000000   0.000000    -0.000000   0.000000   )
 (  0.000734   0.000000    -0.001270   0.000000     0.000000   0.000000   )
 (  0.000000   0.000000    -0.000000   0.000000    -0.000000   0.000000   )
 ( -0.000000   0.000000    -0.000000   0.000000     0.000000   0.000000   )
 (  0.000000   0.000000     0.000000   0.000000    -0.000000   0.000000   )
 (  0.000000   0.000000    -0.000000   0.000000    -0.000000   0.000000   )
 ( -0.000000   0.000000    -0.000000   0.000000     0.000000   0.000000   )
 (  0.000000   0.000000     0.000000   0.000000    -0.000000   0.000000   )
 ( -0.000017   0.000000     0.000029   0.000000    -0.000000   0.000000   )
 ( -0.026144   0.000000     0.010484   0.000000     0.705159   0.000000   )
 (  0.003993   0.000000     0.027883   0.000000    -0.705154   0.000000   )
     freq (  481) =     106.465086 [THz] =    3551.293019 [cm-1]
 ( -0.000000   0.000000    -0.000000   0.000000    -0.000000   0.000000   )
 ( -0.000000   0.000000    -0.000000   0.000000     0.000000   0.000000   )
 (  0.000000   0.000000     0.000000   0.000000     0.000000   0.000000   )
 ( -0.000000   0.000000    -0.000000   0.000000     0.000000   0.000000   )
 ( -0.000000   0.000000    -0.000000   0.000000     0.000000   0.000000   )
 ( -0.000000   0.000000    -0.000000   0.000000    -0.000000   0.000000   )
 (  0.000000   0.000000     0.000000   0.000000    -0.000000   0.000000   )
 (  0.000000   0.000000     0.000000   0.000000    -0.000000   0.000000   )
 (  0.000000   0.000000     0.000000   0.000000     0.000000   0.000000   )
 (  0.000000   0.000000    -0.000000   0.000000     0.000000   0.000000   )
 (  0.000000   0.000000     0.000000   0.000000     0.000000   0.000000   )
 (  0.000000   0.000000     0.000000   0.000000     0.000000   0.000000   )
 ( -0.000000   0.000000    -0.000000   0.000000     0.000000   0.000000   )
 (  0.000000   0.000000    -0.000000   0.000000     0.000000   0.000000   )
 ( -0.000000   0.000000    -0.000000   0.000000     0.000000   0.000000   )
 ( -0.000000   0.000000     0.000000   0.000000     0.000000   0.000000   )
 (  0.000000   0.000000    -0.000000   0.000000     0.000000   0.000000   )
 (  0.000000   0.000000     0.000000   0.000000    -0.000000   0.000000   )
 ( -0.000000   0.000000     0.000000   0.000000    -0.000000   0.000000   )
 ( -0.000000   0.000000     0.000000   0.000000    -0.000000   0.000000   )
 (  0.000000   0.000000    -0.000000   0.000000    -0.000000   0.000000   )
 ( -0.000000   0.000000    -0.000000   0.000000    -0.000000   0.000000   )
 (  0.000000   0.000000     0.000000   0.000000    -0.000000   0.000000   )
 (  0.000000   0.000000    -0.000000   0.000000     0.000000   0.000000   )
 ( -0.000000   0.000000    -0.000000   0.000000     0.000000   0.000000   )
 (  0.000000   0.000000    -0.000000   0.000000     0.000000   0.000000   )
 ( -0.000000   0.000000    -0.000000   0.000000     0.000000   0.000000   )
 (  0.000000   0.000000     0.000000   0.000000     0.000000   0.000000   )
 ( -0.000000   0.000000     0.000000   0.000000     0.000000   0.000000   )
 ( -0.000000   0.000000    -0.000000   0.000000    -0.000000   0.000000   )
 ( -0.000000   0.000000    -0.000000   0.000000    -0.000000   0.000000   )
 ( -0.000000   0.000000     0.000000   0.000000    -0.000000   0.000000   )
 ( -0.000000   0.000000    -0.000000   0.000000    -0.000000   0.000000   )
 ( -0.000000   0.000000    -0.000000   0.000000    -0.000000   0.000000   )
 ( -0.000000   0.000000     0.000000   0.000000    -0.000000   0.000000   )
 ( -0.000000   0.000000    -0.000000   0.000000     0.000000   0.000000   )
 (  0.000000   0.000000     0.000000   0.000000     0.000000   0.000000   )
 (  0.000000   0.000000    -0.000000   0.000000     0.000000   0.000000   )
 (  0.000000   0.000000     0.000000   0.000000     0.000000   0.000000   )
 ( -0.000000   0.000000     0.000000   0.000000     0.000000   0.000000   )
 ( -0.000000   0.000000    -0.000000   0.000000     0.000000   0.000000   )
 ( -0.000000   0.000000    -0.000000   0.000000     0.000000   0.000000   )
 (  0.000000   0.000000     0.000000   0.000000     0.000000   0.000000   )
 ( -0.000000   0.000000    -0.000000   0.000000     0.000000   0.000000   )
 (  0.000000   0.000000     0.000000   0.000000     0.000000   0.000000   )
 ( -0.000000   0.000000    -0.000000   0.000000     0.000000   0.000000   )
 ( -0.000000   0.000000    -0.000000   0.000000     0.000000   0.000000   )
 ( -0.000000   0.000000    -0.000000   0.000000     0.000000   0.000000   )
 ( -0.000000   0.000000    -0.000000   0.000000    -0.000000   0.000000   )
 ( -0.000000   0.000000     0.000000   0.000000     0.000000   0.000000   )
 (  0.000000   0.000000     0.000000   0.000000    -0.000000   0.000000   )
 ( -0.000000   0.000000    -0.000000   0.000000    -0.000000   0.000000   )
 (  0.000000   0.000000     0.000000   0.000000    -0.000000   0.000000   )
 (  0.000000   0.000000     0.000000   0.000000    -0.000000   0.000000   )
 ( -0.000000   0.000000    -0.000000   0.000000    -0.000000   0.000000   )
 (  0.000000   0.000000     0.000000   0.000000    -0.000000   0.000000   )
 (  0.000000   0.000000     0.000000   0.000000     0.000000   0.000000   )
 ( -0.000000   0.000000    -0.000000   0.000000     0.000000   0.000000   )
 (  0.000023   0.000000     0.000013   0.000000     0.000407   0.000000   )
 (  0.000000   0.000000     0.000000   0.000000    -0.000000   0.000000   )
 (  0.000000   0.000000     0.000000   0.000000     0.000000   0.000000   )
 (  0.000000   0.000000    -0.000000   0.000000    -0.000000   0.000000   )
 ( -0.000000   0.000000    -0.000000   0.000000     0.000000   0.000000   )
 (  0.000000   0.000000     0.000000   0.000000     0.000000   0.000000   )
 ( -0.000000   0.000000     0.000000   0.000000     0.000000   0.000000   )
 ( -0.000000   0.000000    -0.000000   0.000000    -0.000000   0.000000   )
 (  0.000000   0.000000     0.000000   0.000000    -0.000000   0.000000   )
 ( -0.000000   0.000000    -0.000000   0.000000    -0.000000   0.000000   )
 ( -0.000000   0.000000    -0.000000   0.000000    -0.000000   0.000000   )
 (  0.000000   0.000000     0.000000   0.000000    -0.000000   0.000000   )
 (  0.000000   0.000000     0.000000   0.000000    -0.000000   0.000000   )
 ( -0.000000   0.000000    -0.000000   0.000000     0.000000   0.000000   )
 (  0.000000   0.000000     0.000000   0.000000     0.000000   0.000000   )
 (  0.000000   0.000000     0.000000   0.000000     0.000000   0.000000   )
 ( -0.000004   0.000000    -0.000002   0.000000    -0.000191   0.000000   )
 ( -0.001899   0.000000     0.000776   0.000000     0.044201   0.000000   )
 ( -0.000278   0.000000    -0.002032   0.000000     0.044201   0.000000   )
 (  0.000000   0.000000     0.000000   0.000000     0.000000   0.000000   )
 (  0.000000   0.000000     0.000000   0.000000     0.000000   0.000000   )
 (  0.000000   0.000000    -0.000000   0.000000     0.000000   0.000000   )
 (  0.000000   0.000000     0.000000   0.000000    -0.000000   0.000000   )
 ( -0.000000   0.000000    -0.000000   0.000000    -0.000000   0.000000   )
 (  0.000000   0.000000     0.000000   0.000000    -0.000000   0.000000   )
 (  0.000000   0.000000     0.000000   0.000000    -0.000000   0.000000   )
 ( -0.000000   0.000000    -0.000000   0.000000    -0.000000   0.000000   )
 (  0.000000   0.000000     0.000000   0.000000    -0.000000   0.000000   )
 (  0.000000   0.000000     0.000000   0.000000     0.000000   0.000000   )
 (  0.000000   0.000000     0.000000   0.000000     0.000000   0.000000   )
 (  0.000000   0.000000     0.000000   0.000000     0.000000   0.000000   )
 (  0.000000   0.000000     0.000000   0.000000    -0.000000   0.000000   )
 ( -0.000000   0.000000    -0.000000   0.000000    -0.000000   0.000000   )
 ( -0.000000   0.000000    -0.000000   0.000000    -0.000000   0.000000   )
 (  0.000000   0.000000     0.000000   0.000000    -0.000000   0.000000   )
 (  0.000000   0.000000    -0.000000   0.000000    -0.000000   0.000000   )
 (  0.000000   0.000000     0.000000   0.000000    -0.000000   0.000000   )
 ( -0.000000   0.000000    -0.000000   0.000000     0.000000   0.000000   )
 (  0.000000   0.000000     0.000000   0.000000     0.000000   0.000000   )
 ( -0.000000   0.000000     0.000000   0.000000     0.000000   0.000000   )
 (  0.000000   0.000000     0.000000   0.000000     0.000000   0.000000   )
 (  0.000000   0.000000    -0.000000   0.000000     0.000000   0.000000   )
 ( -0.000000   0.000000     0.000000   0.000000     0.000000   0.000000   )
 (  0.000000   0.000000     0.000000   0.000000     0.000000   0.000000   )
 ( -0.000000   0.000000    -0.000000   0.000000     0.000000   0.000000   )
 ( -0.000000   0.000000     0.000000   0.000000     0.000000   0.000000   )
 ( -0.000000   0.000000    -0.000000   0.000000     0.000000   0.000000   )
 (  0.000000   0.000000    -0.000000   0.000000     0.000000   0.000000   )
 (  0.000000   0.000000     0.000000   0.000000     0.000000   0.000000   )
 (  0.000000   0.000000     0.000000   0.000000    -0.000000   0.000000   )
 ( -0.000000   0.000000     0.000000   0.000000    -0.000000   0.000000   )
 (  0.000000   0.000000    -0.000000   0.000000    -0.000000   0.000000   )
 ( -0.000000   0.000000    -0.000000   0.000000    -0.000000   0.000000   )
 ( -0.000000   0.000000     0.000000   0.000000    -0.000000   0.000000   )
 (  0.000000   0.000000     0.000000   0.000000    -0.000000   0.000000   )
 ( -0.000000   0.000000     0.000000   0.000000     0.000000   0.000000   )
 (  0.000000   0.000000     0.000000   0.000000     0.000000   0.000000   )
 (  0.000000   0.000000     0.000000   0.000000     0.000000   0.000000   )
 (  0.000000   0.000000     0.000000   0.000000     0.000000   0.000000   )
 (  0.000000   0.000000     0.000000   0.000000     0.000000   0.000000   )
 (  0.000000   0.000000    -0.000000   0.000000     0.000000   0.000000   )
 ( -0.000000   0.000000     0.000000   0.000000    -0.000000   0.000000   )
 ( -0.000000   0.000000    -0.000000   0.000000    -0.000000   0.000000   )
 (  0.000000   0.000000     0.000000   0.000000    -0.000000   0.000000   )
 ( -0.000000   0.000000    -0.000000   0.000000    -0.000000   0.000000   )
 (  0.000000   0.000000    -0.000000   0.000000    -0.000000   0.000000   )
 (  0.000000   0.000000    -0.000000   0.000000    -0.000000   0.000000   )
 (  0.000000   0.000000     0.000000   0.000000     0.000000   0.000000   )
 ( -0.000000   0.000000    -0.000000   0.000000    -0.000000   0.000000   )
 (  0.000000   0.000000    -0.000000   0.000000    -0.000000   0.000000   )
 ( -0.000000   0.000000    -0.000000   0.000000    -0.000000   0.000000   )
 (  0.000000   0.000000     0.000000   0.000000    -0.000000   0.000000   )
 (  0.000000   0.000000     0.000000   0.000000     0.000000   0.000000   )
 ( -0.000000   0.000000     0.000000   0.000000    -0.000000   0.000000   )
 (  0.000000   0.000000     0.000000   0.000000    -0.000000   0.000000   )
 (  0.000000   0.000000     0.000000   0.000000    -0.000000   0.000000   )
 (  0.000000   0.000000     0.000000   0.000000    -0.000000   0.000000   )
 (  0.000000   0.000000     0.000000   0.000000    -0.000000   0.000000   )
 (  0.000000   0.000000    -0.000000   0.000000    -0.000000   0.000000   )
 ( -0.000000   0.000000    -0.000000   0.000000     0.000000   0.000000   )
 (  0.000000   0.000000    -0.000000   0.000000     0.000000   0.000000   )
 (  0.000000   0.000000    -0.000000   0.000000     0.000000   0.000000   )
 ( -0.000000   0.000000     0.000000   0.000000     0.000000   0.000000   )
 (  0.000000   0.000000     0.000000   0.000000     0.000000   0.000000   )
 ( -0.000000   0.000000    -0.000000   0.000000     0.000000   0.000000   )
 ( -0.000000   0.000000    -0.000000   0.000000     0.000000   0.000000   )
 (  0.000000   0.000000     0.000000   0.000000     0.000000   0.000000   )
 ( -0.000000   0.000000    -0.000000   0.000000     0.000000   0.000000   )
 (  0.000000   0.000000    -0.000000   0.000000     0.000000   0.000000   )
 ( -0.000000   0.000000    -0.000000   0.000000     0.000000   0.000000   )
 ( -0.000000   0.000000    -0.000000   0.000000     0.000000   0.000000   )
 ( -0.000000   0.000000    -0.000000   0.000000    -0.000000   0.000000   )
 (  0.000000   0.000000     0.000000   0.000000     0.000000   0.000000   )
 ( -0.000923   0.000000    -0.000533   0.000000    -0.008087   0.000000   )
 (  0.000000   0.000000     0.000000   0.000000     0.000000   0.000000   )
 ( -0.000000   0.000000    -0.000000   0.000000     0.000000   0.000000   )
 ( -0.000000   0.000000    -0.000000   0.000000     0.000000   0.000000   )
 (  0.000000   0.000000     0.000000   0.000000     0.000000   0.000000   )
 ( -0.000000   0.000000     0.000000   0.000000     0.000000   0.000000   )
 ( -0.000000   0.000000    -0.000000   0.000000     0.000000   0.000000   )
 ( -0.000046   0.000000    -0.000026   0.000000     0.002798   0.000000   )
 (  0.026300   0.000000    -0.010439   0.000000    -0.705125   0.000000   )
 (  0.004110   0.000000     0.027996   0.000000    -0.705129   0.000000   )
     freq (  482) =     108.841857 [THz] =    3630.573553 [cm-1]
 ( -0.000000   0.000000    -0.000000   0.000000     0.000000   0.000000   )
 (  0.000000   0.000000     0.000000   0.000000    -0.000000   0.000000   )
 ( -0.000000   0.000000    -0.000000   0.000000    -0.000000   0.000000   )
 (  0.000000   0.000000    -0.000000   0.000000    -0.000000   0.000000   )
 ( -0.000000   0.000000     0.000000   0.000000    -0.000000   0.000000   )
 ( -0.000000   0.000000    -0.000000   0.000000     0.000000   0.000000   )
 (  0.000000   0.000000     0.000000   0.000000     0.000000   0.000000   )
 (  0.000000   0.000000     0.000000   0.000000     0.000000   0.000000   )
 (  0.000000   0.000000     0.000000   0.000000    -0.000000   0.000000   )
 (  0.000000   0.000000     0.000000   0.000000    -0.000000   0.000000   )
 (  0.000000   0.000000     0.000000   0.000000    -0.000000   0.000000   )
 (  0.000000   0.000000    -0.000000   0.000000    -0.000000   0.000000   )
 (  0.000000   0.000000     0.000000   0.000000    -0.000000   0.000000   )
 ( -0.000000   0.000000     0.000000   0.000000    -0.000000   0.000000   )
 (  0.000000   0.000000     0.000000   0.000000    -0.000000   0.000000   )
 ( -0.000000   0.000000    -0.000000   0.000000    -0.000000   0.000000   )
 ( -0.000000   0.000000     0.000000   0.000000    -0.000000   0.000000   )
 ( -0.000000   0.000000     0.000000   0.000000     0.000000   0.000000   )
 ( -0.000000   0.000000    -0.000000   0.000000     0.000000   0.000000   )
 (  0.000000   0.000000     0.000000   0.000000     0.000000   0.000000   )
 ( -0.000000   0.000000    -0.000000   0.000000     0.000000   0.000000   )
 (  0.000000   0.000000    -0.000000   0.000000     0.000000   0.000000   )
 ( -0.000000   0.000000    -0.000000   0.000000     0.000000   0.000000   )
 (  0.000000   0.000000    -0.000000   0.000000    -0.000000   0.000000   )
 ( -0.000000   0.000000     0.000000   0.000000    -0.000000   0.000000   )
 (  0.000000   0.000000     0.000000   0.000000    -0.000000   0.000000   )
 (  0.000000   0.000000    -0.000000   0.000000    -0.000000   0.000000   )
 (  0.000000   0.000000     0.000000   0.000000    -0.000000   0.000000   )
 ( -0.000000   0.000000     0.000000   0.000000    -0.000000   0.000000   )
 ( -0.000000   0.000000    -0.000000   0.000000     0.000000   0.000000   )
 ( -0.000000   0.000000    -0.000000   0.000000     0.000000   0.000000   )
 ( -0.000000   0.000000     0.000000   0.000000     0.000000   0.000000   )
 ( -0.000000   0.000000    -0.000000   0.000000     0.000000   0.000000   )
 ( -0.000000   0.000000    -0.000000   0.000000     0.000000   0.000000   )
 ( -0.000000   0.000000    -0.000000   0.000000     0.000000   0.000000   )
 ( -0.000000   0.000000     0.000000   0.000000     0.000000   0.000000   )
 (  0.000000   0.000000     0.000000   0.000000    -0.000000   0.000000   )
 (  0.000000   0.000000    -0.000000   0.000000    -0.000000   0.000000   )
 (  0.000000   0.000000     0.000000   0.000000    -0.000000   0.000000   )
 ( -0.000000   0.000000     0.000000   0.000000    -0.000000   0.000000   )
 ( -0.000000   0.000000    -0.000000   0.000000     0.000000   0.000000   )
 ( -0.000000   0.000000     0.000000   0.000000    -0.000000   0.000000   )
 ( -0.000000   0.000000    -0.000000   0.000000    -0.000000   0.000000   )
 ( -0.000000   0.000000    -0.000000   0.000000    -0.000000   0.000000   )
 ( -0.000000   0.000000    -0.000000   0.000000    -0.000000   0.000000   )
 ( -0.000000   0.000000     0.000000   0.000000    -0.000000   0.000000   )
 (  0.000000   0.000000    -0.000000   0.000000    -0.000000   0.000000   )
 ( -0.000000   0.000000    -0.000000   0.000000     0.000000   0.000000   )
 ( -0.000000   0.000000    -0.000000   0.000000    -0.000000   0.000000   )
 ( -0.000000   0.000000     0.000000   0.000000     0.000000   0.000000   )
 (  0.000000   0.000000    -0.000000   0.000000     0.000000   0.000000   )
 (  0.000000   0.000000     0.000000   0.000000     0.000000   0.000000   )
 (  0.000000   0.000000     0.000000   0.000000     0.000000   0.000000   )
 (  0.000000   0.000000     0.000000   0.000000     0.000000   0.000000   )
 ( -0.000000   0.000000    -0.000000   0.000000     0.000000   0.000000   )
 (  0.000000   0.000000     0.000000   0.000000     0.000000   0.000000   )
 (  0.000000   0.000000     0.000000   0.000000    -0.000000   0.000000   )
 ( -0.000000   0.000000    -0.000000   0.000000    -0.000000   0.000000   )
 ( -0.000001   0.000000    -0.000001   0.000000    -0.000486   0.000000   )
 (  0.000000   0.000000     0.000000   0.000000    -0.000000   0.000000   )
 (  0.000000   0.000000     0.000000   0.000000     0.000000   0.000000   )
 (  0.000000   0.000000     0.000000   0.000000    -0.000000   0.000000   )
 ( -0.000000   0.000000     0.000000   0.000000    -0.000000   0.000000   )
 ( -0.000000   0.000000    -0.000000   0.000000    -0.000000   0.000000   )
 (  0.000000   0.000000    -0.000000   0.000000    -0.000000   0.000000   )
 ( -0.000000   0.000000    -0.000000   0.000000     0.000000   0.000000   )
 (  0.000000   0.000000     0.000000   0.000000     0.000000   0.000000   )
 ( -0.000000   0.000000    -0.000000   0.000000     0.000000   0.000000   )
 (  0.000000   0.000000     0.000000   0.000000     0.000000   0.000000   )
 ( -0.000000   0.000000     0.000000   0.000000     0.000000   0.000000   )
 (  0.000000   0.000000    -0.000000   0.000000     0.000000   0.000000   )
 (  0.000000   0.000000     0.000000   0.000000    -0.000000   0.000000   )
 ( -0.000000   0.000000     0.000000   0.000000    -0.000000   0.000000   )
 (  0.000000   0.000000    -0.000000   0.000000    -0.000000   0.000000   )
 (  0.000182   0.000000     0.000105   0.000000    -0.062357   0.000000   )
 (  0.000001   0.000000    -0.000003   0.000000    -0.000111   0.000000   )
 ( -0.000003   0.000000     0.000002   0.000000    -0.000111   0.000000   )
 (  0.000000   0.000000     0.000000   0.000000    -0.000000   0.000000   )
 (  0.000000   0.000000     0.000000   0.000000    -0.000000   0.000000   )
 (  0.000000   0.000000     0.000000   0.000000    -0.000000   0.000000   )
 (  0.000000   0.000000    -0.000000   0.000000     0.000000   0.000000   )
 ( -0.000000   0.000000    -0.000000   0.000000     0.000000   0.000000   )
 ( -0.000000   0.000000     0.000000   0.000000     0.000000   0.000000   )
 (  0.000000   0.000000    -0.000000   0.000000     0.000000   0.000000   )
 (  0.000000   0.000000     0.000000   0.000000     0.000000   0.000000   )
 (  0.000000   0.000000     0.000000   0.000000     0.000000   0.000000   )
 (  0.000000   0.000000     0.000000   0.000000    -0.000000   0.000000   )
 (  0.000000   0.000000     0.000000   0.000000    -0.000000   0.000000   )
 (  0.000000   0.000000     0.000000   0.000000    -0.000000   0.000000   )
 (  0.000000   0.000000     0.000000   0.000000     0.000000   0.000000   )
 ( -0.000000   0.000000    -0.000000   0.000000     0.000000   0.000000   )
 ( -0.000000   0.000000     0.000000   0.000000     0.000000   0.000000   )
 (  0.000000   0.000000     0.000000   0.000000     0.000000   0.000000   )
 (  0.000000   0.000000     0.000000   0.000000     0.000000   0.000000   )
 (  0.000000   0.000000     0.000000   0.000000     0.000000   0.000000   )
 (  0.000000   0.000000     0.000000   0.000000    -0.000000   0.000000   )
 ( -0.000000   0.000000    -0.000000   0.000000    -0.000000   0.000000   )
 (  0.000000   0.000000    -0.000000   0.000000    -0.000000   0.000000   )
 ( -0.000000   0.000000    -0.000000   0.000000    -0.000000   0.000000   )
 ( -0.000000   0.000000     0.000000   0.000000    -0.000000   0.000000   )
 (  0.000000   0.000000     0.000000   0.000000    -0.000000   0.000000   )
 (  0.000000   0.000000    -0.000000   0.000000    -0.000000   0.000000   )
 ( -0.000000   0.000000    -0.000000   0.000000    -0.000000   0.000000   )
 ( -0.000000   0.000000     0.000000   0.000000    -0.000000   0.000000   )
 ( -0.000000   0.000000    -0.000000   0.000000    -0.000000   0.000000   )
 (  0.000000   0.000000    -0.000000   0.000000    -0.000000   0.000000   )
 ( -0.000000   0.000000     0.000000   0.000000    -0.000000   0.000000   )
 ( -0.000000   0.000000    -0.000000   0.000000     0.000000   0.000000   )
 (  0.000000   0.000000     0.000000   0.000000     0.000000   0.000000   )
 (  0.000000   0.000000     0.000000   0.000000     0.000000   0.000000   )
 (  0.000000   0.000000     0.000000   0.000000     0.000000   0.000000   )
 (  0.000000   0.000000    -0.000000   0.000000     0.000000   0.000000   )
 ( -0.000000   0.000000    -0.000000   0.000000     0.000000   0.000000   )
 (  0.000000   0.000000     0.000000   0.000000    -0.000000   0.000000   )
 (  0.000000   0.000000     0.000000   0.000000    -0.000000   0.000000   )
 (  0.000000   0.000000    -0.000000   0.000000    -0.000000   0.000000   )
 (  0.000000   0.000000    -0.000000   0.000000    -0.000000   0.000000   )
 (  0.000000   0.000000     0.000000   0.000000    -0.000000   0.000000   )
 (  0.000000   0.000000     0.000000   0.000000    -0.000000   0.000000   )
 (  0.000000   0.000000    -0.000000   0.000000     0.000000   0.000000   )
 ( -0.000000   0.000000     0.000000   0.000000     0.000000   0.000000   )
 ( -0.000000   0.000000     0.000000   0.000000     0.000000   0.000000   )
 ( -0.000000   0.000000    -0.000000   0.000000     0.000000   0.000000   )
 ( -0.000000   0.000000    -0.000000   0.000000     0.000000   0.000000   )
 (  0.000000   0.000000     0.000000   0.000000     0.000000   0.000000   )
 (  0.000000   0.000000    -0.000000   0.000000     0.000000   0.000000   )
 (  0.000000   0.000000     0.000000   0.000000    -0.000000   0.000000   )
 ( -0.000000   0.000000     0.000000   0.000000    -0.000000   0.000000   )
 (  0.000000   0.000000     0.000000   0.000000    -0.000000   0.000000   )
 (  0.000000   0.000000    -0.000000   0.000000    -0.000000   0.000000   )
 ( -0.000000   0.000000     0.000000   0.000000     0.000000   0.000000   )
 (  0.000000   0.000000     0.000000   0.000000     0.000000   0.000000   )
 (  0.000000   0.000000     0.000000   0.000000     0.000000   0.000000   )
 (  0.000000   0.000000    -0.000000   0.000000     0.000000   0.000000   )
 (  0.000000   0.000000    -0.000000   0.000000     0.000000   0.000000   )
 (  0.000000   0.000000     0.000000   0.000000     0.000000   0.000000   )
 (  0.000000   0.000000     0.000000   0.000000     0.000000   0.000000   )
 ( -0.000000   0.000000    -0.000000   0.000000    -0.000000   0.000000   )
 ( -0.000000   0.000000     0.000000   0.000000    -0.000000   0.000000   )
 ( -0.000000   0.000000    -0.000000   0.000000    -0.000000   0.000000   )
 (  0.000000   0.000000    -0.000000   0.000000    -0.000000   0.000000   )
 ( -0.000000   0.000000     0.000000   0.000000    -0.000000   0.000000   )
 ( -0.000000   0.000000    -0.000000   0.000000    -0.000000   0.000000   )
 ( -0.000000   0.000000     0.000000   0.000000    -0.000000   0.000000   )
 (  0.000000   0.000000    -0.000000   0.000000     0.000000   0.000000   )
 ( -0.000000   0.000000    -0.000000   0.000000    -0.000000   0.000000   )
 (  0.000000   0.000000     0.000000   0.000000     0.000000   0.000000   )
 ( -0.000000   0.000000     0.000000   0.000000    -0.000000   0.000000   )
 (  0.000000   0.000000    -0.000000   0.000000    -0.000000   0.000000   )
 ( -0.000000   0.000000    -0.000000   0.000000     0.000000   0.000000   )
 (  0.000000   0.000000     0.000000   0.000000    -0.000000   0.000000   )
 ( -0.000359   0.000000    -0.000207   0.000000     0.008316   0.000000   )
 ( -0.000000   0.000000    -0.000000   0.000000    -0.000000   0.000000   )
 ( -0.000000   0.000000    -0.000000   0.000000    -0.000000   0.000000   )
 ( -0.000000   0.000000     0.000000   0.000000    -0.000000   0.000000   )
 ( -0.000000   0.000000    -0.000000   0.000000    -0.000000   0.000000   )
 (  0.000000   0.000000    -0.000000   0.000000    -0.000000   0.000000   )
 ( -0.000000   0.000000     0.000000   0.000000    -0.000000   0.000000   )
 ( -0.010242   0.000000    -0.005913   0.000000     0.997945   0.000000   )
 ( -0.000061   0.000000     0.000054   0.000000     0.001951   0.000000   )
 (  0.000016   0.000000    -0.000080   0.000000     0.001951   0.000000   )
     freq (  483) =     110.657470 [THz] =    3691.135885 [cm-1]
 (  0.000000   0.000000     0.000000   0.000000     0.000000   0.000000   )
 (  0.000000   0.000000     0.000000   0.000000    -0.000000   0.000000   )
 ( -0.000000   0.000000    -0.000000   0.000000    -0.000000   0.000000   )
 (  0.000000   0.000000     0.000000   0.000000    -0.000000   0.000000   )
 (  0.000000   0.000000     0.000000   0.000000    -0.000000   0.000000   )
 (  0.000000   0.000000     0.000000   0.000000     0.000000   0.000000   )
 (  0.000000   0.000000    -0.000000   0.000000     0.000000   0.000000   )
 ( -0.000000   0.000000     0.000000   0.000000     0.000000   0.000000   )
 ( -0.000000   0.000000    -0.000000   0.000000     0.000000   0.000000   )
 (  0.000000   0.000000    -0.000000   0.000000     0.000000   0.000000   )
 ( -0.000000   0.000000     0.000000   0.000000     0.000000   0.000000   )
 ( -0.000000   0.000000    -0.000000   0.000000    -0.000000   0.000000   )
 (  0.000000   0.000000     0.000000   0.000000    -0.000000   0.000000   )
 ( -0.000000   0.000000     0.000000   0.000000    -0.000000   0.000000   )
 (  0.000000   0.000000     0.000000   0.000000    -0.000000   0.000000   )
 (  0.000000   0.000000    -0.000000   0.000000    -0.000000   0.000000   )
 ( -0.000000   0.000000     0.000000   0.000000    -0.000000   0.000000   )
 ( -0.000000   0.000000     0.000000   0.000000     0.000000   0.000000   )
 (  0.000000   0.000000    -0.000000   0.000000     0.000000   0.000000   )
 (  0.000000   0.000000     0.000000   0.000000     0.000000   0.000000   )
 ( -0.000000   0.000000     0.000000   0.000000     0.000000   0.000000   )
 (  0.000000   0.000000    -0.000000   0.000000     0.000000   0.000000   )
 (  0.000000   0.000000    -0.000000   0.000000     0.000000   0.000000   )
 ( -0.000000   0.000000    -0.000000   0.000000     0.000000   0.000000   )
 (  0.000000   0.000000    -0.000000   0.000000     0.000000   0.000000   )
 ( -0.000000   0.000000     0.000000   0.000000     0.000000   0.000000   )
 (  0.000000   0.000000     0.000000   0.000000     0.000000   0.000000   )
 (  0.000000   0.000000    -0.000000   0.000000     0.000000   0.000000   )
 ( -0.000000   0.000000    -0.000000   0.000000     0.000000   0.000000   )
 ( -0.000000   0.000000    -0.000000   0.000000     0.000000   0.000000   )
 (  0.000000   0.000000     0.000000   0.000000     0.000000   0.000000   )
 (  0.000000   0.000000    -0.000000   0.000000     0.000000   0.000000   )
 (  0.000000   0.000000     0.000000   0.000000     0.000000   0.000000   )
 (  0.000000   0.000000     0.000000   0.000000     0.000000   0.000000   )
 ( -0.000000   0.000000     0.000000   0.000000     0.000000   0.000000   )
 (  0.000000   0.000000     0.000000   0.000000     0.000000   0.000000   )
 ( -0.000000   0.000000    -0.000000   0.000000     0.000000   0.000000   )
 (  0.000000   0.000000     0.000000   0.000000     0.000000   0.000000   )
 ( -0.000000   0.000000    -0.000000   0.000000     0.000000   0.000000   )
 (  0.000000   0.000000     0.000000   0.000000     0.000000   0.000000   )
 (  0.000000   0.000000     0.000000   0.000000     0.000000   0.000000   )
 (  0.000000   0.000000     0.000000   0.000000    -0.000000   0.000000   )
 ( -0.000000   0.000000     0.000000   0.000000    -0.000000   0.000000   )
 (  0.000000   0.000000    -0.000000   0.000000    -0.000000   0.000000   )
 ( -0.000000   0.000000    -0.000000   0.000000    -0.000000   0.000000   )
 ( -0.000000   0.000000     0.000000   0.000000    -0.000000   0.000000   )
 (  0.000000   0.000000     0.000000   0.000000    -0.000000   0.000000   )
 ( -0.000000   0.000000     0.000000   0.000000    -0.000000   0.000000   )
 ( -0.000000   0.000000    -0.000000   0.000000    -0.000000   0.000000   )
 (  0.000000   0.000000    -0.000000   0.000000    -0.000000   0.000000   )
 (  0.000000   0.000000    -0.000000   0.000000    -0.000000   0.000000   )
 (  0.000000   0.000000     0.000000   0.000000    -0.000000   0.000000   )
 ( -0.000000   0.000000     0.000000   0.000000    -0.000000   0.000000   )
 ( -0.000000   0.000000    -0.000000   0.000000     0.000000   0.000000   )
 (  0.000000   0.000000     0.000000   0.000000     0.000000   0.000000   )
 ( -0.000000   0.000000     0.000000   0.000000     0.000000   0.000000   )
 (  0.000000   0.000000     0.000000   0.000000     0.000000   0.000000   )
 (  0.000000   0.000000     0.000000   0.000000    -0.000000   0.000000   )
 (  0.002002   0.000000     0.001156   0.000000     0.062683   0.000000   )
 (  0.000000   0.000000    -0.000000   0.000000     0.000000   0.000000   )
 (  0.000000   0.000000     0.000000   0.000000     0.000000   0.000000   )
 ( -0.000000   0.000000     0.000000   0.000000     0.000000   0.000000   )
 (  0.000000   0.000000     0.000000   0.000000    -0.000000   0.000000   )
 ( -0.000000   0.000000    -0.000000   0.000000    -0.000000   0.000000   )
 (  0.000000   0.000000    -0.000000   0.000000    -0.000000   0.000000   )
 (  0.000000   0.000000     0.000000   0.000000    -0.000000   0.000000   )
 ( -0.000000   0.000000    -0.000000   0.000000    -0.000000   0.000000   )
 (  0.000000   0.000000    -0.000000   0.000000    -0.000000   0.000000   )
 ( -0.000000   0.000000    -0.000000   0.000000     0.000000   0.000000   )
 ( -0.000000   0.000000    -0.000000   0.000000     0.000000   0.000000   )
 ( -0.000000   0.000000    -0.000000   0.000000     0.000000   0.000000   )
 (  0.000000   0.000000     0.000000   0.000000    -0.000000   0.000000   )
 ( -0.000000   0.000000     0.000000   0.000000    -0.000000   0.000000   )
 (  0.000000   0.000000    -0.000000   0.000000    -0.000000   0.000000   )
 (  0.000014   0.000000     0.000008   0.000000    -0.000517   0.000000   )
 ( -0.000005   0.000000     0.000008   0.000000    -0.000364   0.000000   )
 (  0.000004   0.000000    -0.000008   0.000000    -0.000364   0.000000   )
 (  0.000000   0.000000    -0.000000   0.000000    -0.000000   0.000000   )
 (  0.000000   0.000000     0.000000   0.000000    -0.000000   0.000000   )
 ( -0.000000   0.000000     0.000000   0.000000    -0.000000   0.000000   )
 ( -0.000000   0.000000    -0.000000   0.000000     0.000000   0.000000   )
 (  0.000000   0.000000     0.000000   0.000000     0.000000   0.000000   )
 ( -0.000000   0.000000    -0.000000   0.000000     0.000000   0.000000   )
 (  0.000000   0.000000    -0.000000   0.000000     0.000000   0.000000   )
 (  0.000000   0.000000     0.000000   0.000000     0.000000   0.000000   )
 ( -0.000000   0.000000     0.000000   0.000000     0.000000   0.000000   )
 ( -0.000000   0.000000    -0.000000   0.000000    -0.000000   0.000000   )
 (  0.000000   0.000000    -0.000000   0.000000    -0.000000   0.000000   )
 ( -0.000000   0.000000     0.000000   0.000000    -0.000000   0.000000   )
 ( -0.000000   0.000000    -0.000000   0.000000     0.000000   0.000000   )
 (  0.000000   0.000000    -0.000000   0.000000     0.000000   0.000000   )
 (  0.000000   0.000000     0.000000   0.000000     0.000000   0.000000   )
 ( -0.000000   0.000000    -0.000000   0.000000     0.000000   0.000000   )
 (  0.000000   0.000000    -0.000000   0.000000     0.000000   0.000000   )
 ( -0.000000   0.000000     0.000000   0.000000     0.000000   0.000000   )
 (  0.000000   0.000000     0.000000   0.000000    -0.000000   0.000000   )
 ( -0.000000   0.000000     0.000000   0.000000    -0.000000   0.000000   )
 (  0.000000   0.000000    -0.000000   0.000000    -0.000000   0.000000   )
 ( -0.000000   0.000000    -0.000000   0.000000    -0.000000   0.000000   )
 ( -0.000000   0.000000     0.000000   0.000000    -0.000000   0.000000   )
 (  0.000000   0.000000    -0.000000   0.000000    -0.000000   0.000000   )
 ( -0.000000   0.000000    -0.000000   0.000000    -0.000000   0.000000   )
 (  0.000000   0.000000    -0.000000   0.000000    -0.000000   0.000000   )
 (  0.000000   0.000000     0.000000   0.000000    -0.000000   0.000000   )
 (  0.000000   0.000000     0.000000   0.000000    -0.000000   0.000000   )
 (  0.000000   0.000000    -0.000000   0.000000    -0.000000   0.000000   )
 ( -0.000000   0.000000     0.000000   0.000000    -0.000000   0.000000   )
 (  0.000000   0.000000     0.000000   0.000000     0.000000   0.000000   )
 ( -0.000000   0.000000    -0.000000   0.000000     0.000000   0.000000   )
 (  0.000000   0.000000    -0.000000   0.000000     0.000000   0.000000   )
 ( -0.000000   0.000000    -0.000000   0.000000     0.000000   0.000000   )
 ( -0.000000   0.000000     0.000000   0.000000     0.000000   0.000000   )
 (  0.000000   0.000000    -0.000000   0.000000     0.000000   0.000000   )
 (  0.000000   0.000000    -0.000000   0.000000    -0.000000   0.000000   )
 (  0.000000   0.000000     0.000000   0.000000    -0.000000   0.000000   )
 ( -0.000000   0.000000     0.000000   0.000000    -0.000000   0.000000   )
 (  0.000000   0.000000     0.000000   0.000000    -0.000000   0.000000   )
 ( -0.000000   0.000000    -0.000000   0.000000    -0.000000   0.000000   )
 ( -0.000000   0.000000     0.000000   0.000000    -0.000000   0.000000   )
 ( -0.000000   0.000000    -0.000000   0.000000     0.000000   0.000000   )
 (  0.000000   0.000000    -0.000000   0.000000     0.000000   0.000000   )
 (  0.000000   0.000000     0.000000   0.000000     0.000000   0.000000   )
 ( -0.000000   0.000000     0.000000   0.000000     0.000000   0.000000   )
 (  0.000000   0.000000    -0.000000   0.000000     0.000000   0.000000   )
 ( -0.000000   0.000000    -0.000000   0.000000     0.000000   0.000000   )
 ( -0.000000   0.000000    -0.000000   0.000000     0.000000   0.000000   )
 (  0.000000   0.000000    -0.000000   0.000000     0.000000   0.000000   )
 ( -0.000000   0.000000     0.000000   0.000000     0.000000   0.000000   )
 (  0.000000   0.000000     0.000000   0.000000     0.000000   0.000000   )
 (  0.000000   0.000000    -0.000000   0.000000     0.000000   0.000000   )
 ( -0.000000   0.000000    -0.000000   0.000000     0.000000   0.000000   )
 (  0.000000   0.000000    -0.000000   0.000000     0.000000   0.000000   )
 (  0.000000   0.000000     0.000000   0.000000     0.000000   0.000000   )
 ( -0.000000   0.000000     0.000000   0.000000     0.000000   0.000000   )
 (  0.000000   0.000000     0.000000   0.000000     0.000000   0.000000   )
 ( -0.000000   0.000000    -0.000000   0.000000     0.000000   0.000000   )
 ( -0.000000   0.000000     0.000000   0.000000     0.000000   0.000000   )
 (  0.000000   0.000000     0.000000   0.000000     0.000000   0.000000   )
 ( -0.000000   0.000000     0.000000   0.000000    -0.000000   0.000000   )
 ( -0.000000   0.000000    -0.000000   0.000000    -0.000000   0.000000   )
 (  0.000000   0.000000    -0.000000   0.000000    -0.000000   0.000000   )
 ( -0.000000   0.000000     0.000000   0.000000    -0.000000   0.000000   )
 (  0.000000   0.000000     0.000000   0.000000     0.000000   0.000000   )
 (  0.000000   0.000000     0.000000   0.000000    -0.000000   0.000000   )
 ( -0.000000   0.000000    -0.000000   0.000000    -0.000000   0.000000   )
 (  0.000000   0.000000    -0.000000   0.000000    -0.000000   0.000000   )
 ( -0.000000   0.000000    -0.000000   0.000000    -0.000000   0.000000   )
 ( -0.000000   0.000000     0.000000   0.000000    -0.000000   0.000000   )
 (  0.000000   0.000000     0.000000   0.000000    -0.000000   0.000000   )
 (  0.000000   0.000000     0.000000   0.000000     0.000000   0.000000   )
 (  0.000000   0.000000     0.000000   0.000000     0.000000   0.000000   )
 ( -0.029526   0.000000    -0.017047   0.000000    -0.997382   0.000000   )
 ( -0.000000   0.000000    -0.000000   0.000000     0.000000   0.000000   )
 (  0.000000   0.000000     0.000000   0.000000     0.000000   0.000000   )
 (  0.000000   0.000000    -0.000000   0.000000     0.000000   0.000000   )
 ( -0.000000   0.000000    -0.000000   0.000000    -0.000000   0.000000   )
 (  0.000000   0.000000    -0.000000   0.000000    -0.000000   0.000000   )
 ( -0.000000   0.000000     0.000000   0.000000    -0.000000   0.000000   )
 (  0.000038   0.000000     0.000022   0.000000     0.008246   0.000000   )
 ( -0.000345   0.000000     0.000169   0.000000     0.005673   0.000000   )
 ( -0.000026   0.000000    -0.000383   0.000000     0.005673   0.000000   )
 **************************************************************************
