# Supplementary material for: Theoretical OH stretching vibrations in dravite
Source: Copernicus journal article supplement (doi:10.5194/ejm-34-239-2022), 2022-04-13
Supplement: Supplementary file 3 [file ejm-34-239-2022-supplement.zip › ejm-2021-65-supplement-version2/supplementary_files/Structure_and_eigendisplacement_files/chemically_disordered_models_simple_hexagonal_cell/dravite_Al.cif]

#======================================================================

# CRYSTAL DATA

#----------------------------------------------------------------------

data_VESTA_phase_1


_pd_phase_name                         
_cell_length_a 16.1067867
_cell_length_b 16.1067867
_cell_length_c 7.27903080
_cell_angle_alpha                      90
_cell_angle_beta                       90
_cell_angle_gamma                      120
_symmetry_space_group_name_H-M         'P1'
_symmetry_Int_Tables_number            1

loop_
_symmetry_equiv_pos_as_xyz
   'x, y, z'

loop_
   _atom_site_label
   _atom_site_fract_x
   _atom_site_fract_y
   _atom_site_fract_z
Na      -0.000607843   0.000609794   0.276554733
Na       0.666447315   0.333552558   0.610670575
Na       0.336560305   0.663440271   0.939802670
Mg       0.126559494   0.063285387   0.645680993
Mg       0.936714146   0.063286263   0.646949266
Mg       0.936715045   0.873440859   0.645679258
Mg       0.793282055   0.396373526   0.979722355
Mg       0.603408432   0.396592424   0.980648878
Mg       0.603627282   0.206718815   0.979723230
Mg       0.460687331   0.730434322   0.313761165
Al       0.268729613   0.731271026   0.315433771
Mg       0.269566337   0.539313234   0.313761141
Al       0.298653813   0.261892178   0.633709249
Al       0.738497582   0.037043243   0.632414762
Al       0.962441153   0.701377116   0.631105321
Al       0.738108337   0.701346759   0.633708848
Al       0.962957369   0.261502967   0.632414825
Al       0.298623498   0.037559572   0.631105702
Al       0.963883726   0.594498959   0.963662245
Al       0.404910780   0.370076150   0.967250202
Al       0.628904624   0.033476630   0.965274303
Al       0.405501740   0.036117041   0.963662614
Al       0.629924479   0.595089890   0.967249947
Al       0.966524014   0.371095913   0.965274341
Al       0.631668907   0.927580422   0.300432128
Al       0.068890530   0.701552220   0.298165734
Al       0.297072231   0.368269598   0.301155386
Al       0.072420246   0.368331627   0.300432153
Al       0.298448526   0.931110220   0.298166104
Al       0.631730991   0.702928462   0.301155081
Si       0.192376630   0.190564075   0.016822549
Si       0.808721770   0.002063546   0.016829856
Si       0.998418462   0.807485765   0.014695600
Si       0.809436508   0.807623906   0.016821853
Si       0.997937094   0.191278760   0.016829990
Si       0.192514930   0.001582329   0.014696245
Si       0.859027406   0.523610503   0.349347608
Si       0.475929352   0.335108353   0.350649647
Si       0.664649297   0.140119883   0.349173982
Si       0.476390224   0.140973388   0.349348039
Si       0.664892446   0.524071440   0.350649421
Si       0.859880786   0.335351319   0.349173781
Si       0.525951319   0.856964587   0.683521144
Si       0.143360570   0.668844367   0.683691807
Si       0.331627493   0.474103277   0.685034303
Si       0.143036116   0.474049221   0.683521147
Si       0.331156270   0.856640200   0.683691993
Si       0.525897256   0.668373150   0.685034157
B        0.110424613   0.220486606   0.474866442
B        0.779513964   0.889576021   0.474865805
B        0.110557626   0.889443041   0.471263067
B        0.776540781   0.553420450   0.807302133
B        0.446580216   0.223459865   0.807302693
B        0.776949731   0.223050843   0.807806405
B        0.440372736   0.885892009   0.143562646
B        0.114108634   0.559627852   0.143562623
B        0.443226216   0.556774429   0.142997286
O        0.000360894  -0.000361031   0.793120758
O        0.667016888   0.332984441   0.127842233
O        0.326916290   0.673084260   0.454329597
O        0.062022407   0.124084293   0.498319900
O        0.875916307   0.937978234   0.498318568
O        0.062547453   0.937453307   0.496595239
O        0.728744416   0.457170639   0.832086948
O        0.542830016   0.271256210   0.832087763
O        0.728761026   0.271239485   0.832463289
O        0.385229229   0.788202039   0.176427617
O        0.211798573   0.614771308   0.176427720
O        0.394644488   0.605356127   0.169202673
O        0.270572172   0.134838090   0.531229182
O        0.864699799   0.135300839   0.531868159
O        0.865162521   0.729428268   0.531228635
O        0.938050619   0.469366779   0.865196338
O        0.531261262   0.468739403   0.867170445
O        0.530633754   0.061950004   0.865196620
O        0.602803311   0.801032816   0.200807530
O        0.204524846   0.795475953   0.196861107
O        0.198967966   0.397197343   0.200807659
O        0.091651150   0.184000164   0.086111552
O        0.816000388   0.908349395   0.086110655
O        0.093656213   0.906344446   0.085495145
O        0.760694303   0.520776852   0.419792553
O        0.479224065   0.239306586   0.419792927
O        0.760431543   0.239569125   0.415253287
O        0.424468615   0.849437186   0.752031239
O        0.150563904   0.575532159   0.752030864
O        0.425090644   0.574909948   0.755197257
O        0.185724428   0.092321491   0.106627956
O        0.905730041   0.094270502   0.108127880
O        0.907679164   0.814276160   0.106626916
O        0.850442260   0.425007650   0.440321644
O        0.575168211   0.424832635   0.441007602
O        0.574992989   0.149558347   0.440322176
O        0.518057842   0.759075041   0.775774828
O        0.240199233   0.759801426   0.776939644
O        0.240925538   0.481942541   0.775775004
O        0.199184524   0.189341224   0.795465054
O        0.810038977   0.009419866   0.795458181
O        0.991402403   0.800896958   0.793332453
O        0.810659456   0.800816071   0.795464345
O        0.990580890   0.189961659   0.795458312
O        0.199103894   0.008598634   0.793333171
O        0.865803616   0.523255208   0.128075669
O        0.476927314   0.342877698   0.129409559
O        0.654777400   0.131500938   0.128263368
O        0.476745576   0.134197254   0.128076084
O        0.657123209   0.523073569   0.129409325
O        0.868499644   0.345223097   0.128263151
O        0.530520497   0.855394011   0.461722787
O        0.150850836   0.679917863   0.459165062
O        0.324073327   0.469010991   0.463492010
O        0.144606679   0.469479970   0.461722811
O        0.320082872   0.849149846   0.459165219
O        0.530989612   0.675927397   0.463491867
O        0.284622463   0.286034046   0.101850135
O        0.711933565  -0.002805701   0.100331015
O        1.002149164   0.715174957   0.098551634
O        0.713966572   0.715378192   0.101849716
O        1.002806389   0.288067023   0.100331044
O        0.284825758  -0.002148385   0.098552078
O        0.953321029   0.618289998   0.433770060
O        0.381301219   0.333571173   0.435688836
O        0.666051863   0.046966252   0.433968400
O        0.381710661   0.046679774   0.433770399
O        0.666429429   0.618699485   0.435688527
O        0.953034382   0.333948731   0.433968364
O        0.617698271   0.952349589   0.766941086
O        0.047448188   0.665009529   0.763173085
O        0.334248697   0.381748801   0.768839857
O        0.047651038   0.382302365   0.766941095
O        0.334990928   0.952552472   0.763173485
O        0.618251735   0.665751917   0.768839637
O        0.210801019   0.271665292   0.463994916
O        0.728076548   0.938588687   0.463461227
O        0.061910017   0.788861601   0.459518083
O        0.728335256   0.789199598   0.463994575
O        0.061411898   0.271923954   0.463461312
O        0.211139065   0.938090545   0.459518593
O        0.877197257   0.604622239   0.794754352
O        0.395396221   0.272471596   0.796593929
O        0.727302547   0.122642998   0.796062126
O        0.395378464   0.122803419   0.794754652
O        0.727529002   0.604604413   0.796593493
O        0.877357588   0.272698009   0.796062123
O        0.539387981   0.931262892   0.126158798
O        0.061096973   0.605754838   0.130519485
O        0.393725088   0.456797102   0.130485290
O        0.068737692   0.460612588   0.126158939
O        0.394245887   0.938903808   0.130519825
O        0.543203546   0.606275619   0.130485125
H       -0.000063516   0.000058948   0.924870360
H        0.666852504   0.333150341   0.259605974
H        0.324416888   0.675583239   0.586099857
H        0.269248835   0.135064451   0.397638409
H        0.865512876   0.134487813   0.398249466
H        0.864936026   0.730751237   0.397637852
H        0.936086750   0.468058964   0.731636621
H        0.531857420   0.468143196   0.733615913
H        0.531941587   0.063914072   0.731636911
H        0.604122458   0.801526563   0.067265143
H        0.205576548   0.794424358   0.062808179
H        0.198474221   0.395878049   0.067265277
