# Supplementary material for: Theoretical OH stretching vibrations in dravite
Source: Copernicus journal article supplement (doi:10.5194/ejm-34-239-2022), 2022-04-13
Supplement: Supplementary file 3 [file ejm-34-239-2022-supplement.zip › ejm-2021-65-supplement-version2/supplementary_files/Structure_and_eigendisplacement_files/chemically_disordered_models_simple_hexagonal_cell/dravite_Al_Mg.cif]

#======================================================================

# CRYSTAL DATA

#----------------------------------------------------------------------

data_VESTA_phase_1


_pd_phase_name                         
_cell_length_a 16.1067867
_cell_length_b 16.1067867
_cell_length_c 7.27903080
_cell_angle_alpha                      90
_cell_angle_beta                       90
_cell_angle_gamma                      120
_symmetry_space_group_name_H-M         'P1'
_symmetry_Int_Tables_number            1

loop_
_symmetry_equiv_pos_as_xyz
   'x, y, z'

loop_
   _atom_site_label
   _atom_site_fract_x
   _atom_site_fract_y
   _atom_site_fract_z
Na       0.001177290  -0.000135765   0.275717808
Na       0.669579308   0.336197645   0.610145647
Na       0.334404226   0.665672334   0.941328038
Mg       0.126252089   0.063479586   0.647683921
Mg       0.936378133   0.063293987   0.646354068
Mg       0.936912528   0.873713588   0.642244610
Mg       0.794262933   0.397600762   0.980051393
Mg       0.603525671   0.396585994   0.979971321
Mg       0.603735650   0.207185439   0.979872491
Mg       0.460795859   0.730314425   0.313952884
Al       0.268581261   0.730648690   0.317771265
Mg       0.269475839   0.539789200   0.312453220
Al       0.298203381   0.261234649   0.633037053
Al       0.738222753   0.037271913   0.631959891
Al       0.963705318   0.702047919   0.630986810
Al       0.738744735   0.701684777   0.632525726
Al       0.963140560   0.261993602   0.632568919
Al       0.298274482   0.036578194   0.631184207
Al       0.964952575   0.596359224   0.965119215
Al       0.404831679   0.369695307   0.966219732
Al       0.628839512   0.033778499   0.965235698
Al       0.405324216   0.036258107   0.965566576
Al       0.630176287   0.595167065   0.965836883
Al       0.966711480   0.372059516   0.964878723
Al       0.631538804   0.927802998   0.300065884
Mg       0.070870503   0.702972563   0.297369163
Al       0.296487322   0.367990644   0.300292872
Al       0.072333843   0.369010454   0.299833062
Al       0.297829849   0.929150173   0.299154684
Al       0.631887631   0.702933291   0.300125789
Si       0.191961561   0.189773197   0.017166004
Si       0.808286623   0.002547893   0.016230217
Si       0.996173761   0.806401127   0.012269065
Si       0.808937010   0.808489354   0.015433754
Si       0.997927687   0.191159129   0.016603283
Si       0.191930176   0.000184986   0.015832281
Si       0.857628930   0.523057231   0.352430466
Si       0.474674969   0.334555270   0.349925568
Si       0.664438337   0.140182834   0.349112417
Si       0.476248200   0.141194760   0.349651985
Si       0.662960053   0.523164553   0.350235736
Si       0.859693658   0.335244136   0.349224878
Si       0.526204658   0.856950303   0.684178687
Si       0.145283123   0.669019626   0.687317947
Si       0.331617870   0.473655726   0.684077741
Si       0.143284776   0.474033276   0.684754620
Si       0.331517749   0.856302560   0.687699719
Si       0.525759628   0.668101343   0.684142783
B        0.109899006   0.220564502   0.474949733
B        0.779267377   0.889818155   0.473383807
B        0.110026140   0.890428221   0.478418695
B        0.777143291   0.553969652   0.808087426
B        0.446773022   0.223289182   0.806341698
B        0.776958992   0.223262334   0.807687220
B        0.441440658   0.886690903   0.145365083
B        0.115161034   0.559509384   0.134988444
B        0.443222139   0.556705328   0.141414446
O       -0.000752017   0.000297448   0.793460303
O        0.666742348   0.332884342   0.127587153
O        0.330053386   0.672943875   0.453809725
O        0.061701016   0.124310720   0.499002213
O        0.875630042   0.938363495   0.496308363
O        0.064084541   0.941679840   0.496359407
O        0.728446718   0.457406749   0.832923446
O        0.543119439   0.271485041   0.830761006
O        0.728863728   0.271480587   0.832812108
O        0.387002397   0.789200823   0.178689001
O        0.213099364   0.613933055   0.174604355
O        0.394797561   0.605266157   0.167056993
O        0.270615445   0.135126706   0.532018570
O        0.864563270   0.135394314   0.531482710
O        0.862942899   0.729826615   0.530653102
O        0.936212528   0.467388684   0.862906873
O        0.530911757   0.468229967   0.865961147
O        0.530955292   0.062417279   0.865649655
O        0.602788419   0.801125169   0.200218470
O        0.214889836   0.800728744   0.195042507
O        0.199258089   0.396867268   0.200464666
O        0.091714862   0.184132090   0.086299782
O        0.812263774   0.907528549   0.085569726
O        0.093313257   0.904693972   0.083969844
O        0.755173778   0.514185341   0.418209759
O        0.479382520   0.239781939   0.420258414
O        0.760819554   0.238536493   0.415305715
O        0.425860711   0.850321556   0.755718946
O        0.152513186   0.575166446   0.758152769
O        0.424910686   0.574637855   0.754118813
O        0.184467089   0.091212215   0.106786308
O        0.905867580   0.093831157   0.107489631
O        0.908775626   0.819916274   0.105044928
O        0.848115410   0.422878208   0.441333706
O        0.571409067   0.425848629   0.441759606
O        0.575161858   0.150112868   0.440086645
O        0.519028574   0.759206634   0.775601863
O        0.241991554   0.760020886   0.785471294
O        0.240452765   0.479576306   0.776087441
O        0.199024870   0.189409859   0.795791783
O        0.809943573   0.010136742   0.794916466
O        0.988358110   0.802363583   0.791439423
O        0.809185882   0.801863159   0.794076568
O        0.990578870   0.189958095   0.795202463
O        0.199596328   0.009278847   0.794638645
O        0.866137360   0.521698636   0.131033441
O        0.476325477   0.341924392   0.128562089
O        0.654531579   0.131776484   0.128266306
O        0.476881800   0.135534847   0.128125627
O        0.655506743   0.522381393   0.128927615
O        0.868326170   0.344419058   0.128347757
O        0.531123067   0.855453029   0.462496705
O        0.159059754   0.678974598   0.466749780
O        0.324467212   0.468968453   0.462496852
O        0.145198613   0.469193161   0.462971360
O        0.322486801   0.850249712   0.463859177
O        0.530976194   0.675520225   0.462595382
O        0.284400799   0.285508366   0.101274944
O        0.712295414  -0.001223065   0.100549323
O        0.993802844   0.711753763   0.088942171
O        0.714175330   0.715258077   0.100970116
O        1.002265851   0.287298130   0.100721694
O        0.285291272  -0.001605147   0.099858634
O        0.946295761   0.615514087   0.444859741
O        0.379537439   0.332094595   0.433861980
O        0.665298762   0.046799714   0.434203368
O        0.382187544   0.047023697   0.434568948
O        0.666466305   0.618933182   0.434267334
O        0.953056073   0.334214105   0.434235686
O        0.618178068   0.952464835   0.767210329
O        0.048200333   0.664840538   0.760912817
O        0.334680619   0.381417201   0.767502973
O        0.047524222   0.381829439   0.766618804
O        0.335369247   0.952600102   0.766178869
O        0.617910692   0.665245922   0.767739035
O        0.210232689   0.271677332   0.464091384
O        0.728058325   0.939156940   0.462675170
O        0.061537223   0.792227846   0.476387650
O        0.727668335   0.789545062   0.462750995
O        0.060999859   0.271961013   0.462978627
O        0.211674413   0.939153227   0.461412928
O        0.876741388   0.604728376   0.796398320
O        0.395398047   0.272190064   0.795628951
O        0.726918356   0.122769497   0.795567002
O        0.395734124   0.122811403   0.794544262
O        0.727227174   0.604683687   0.796324904
O        0.877169847   0.272199484   0.795951023
O        0.540609108   0.931712930   0.126428397
O        0.063776277   0.604262711   0.109178656
O        0.393830705   0.456528857   0.129478548
O        0.069565972   0.459124585   0.125646492
O        0.397387883   0.941494696   0.133198602
O        0.543250193   0.606285102   0.129163578
H       -0.004029553  -0.005110303   0.924800322
H        0.669885774   0.337091528   0.259084130
H        0.320615824   0.670182197   0.584589589
H        0.268153790   0.134094394   0.398516395
H        0.865543071   0.134900057   0.397908351
H        0.863043880   0.728862313   0.397180206
H        0.934011686   0.466713791   0.729403885
H        0.531680469   0.467224910   0.732395574
H        0.531575135   0.064021149   0.732122091
H        0.603682305   0.801467894   0.066679790
H        0.216126645   0.798177046   0.061311526
H        0.198664019   0.396256349   0.066900223
