# Supplementary material for: Theoretical OH stretching vibrations in dravite
Source: Copernicus journal article supplement (doi:10.5194/ejm-34-239-2022), 2022-04-13
Supplement: Supplementary file 3 [file ejm-34-239-2022-supplement.zip › ejm-2021-65-supplement-version2/supplementary_files/Structure_and_eigendisplacement_files/chemically_disordered_models_simple_hexagonal_cell/dravite_Al_Mg.txt]

     freq (  483) =     107.900118 [THz] =    3599.160518 [cm-1]
 (  0.000000   0.000000    -0.000000   0.000000    -0.000000   0.000000   )
 ( -0.000000   0.000000    -0.000000   0.000000    -0.000000   0.000000   )
 (  0.000000   0.000000    -0.000000   0.000000     0.000000   0.000000   )
 (  0.000000   0.000000    -0.000000   0.000000    -0.000000   0.000000   )
 (  0.000000   0.000000    -0.000000   0.000000    -0.000000   0.000000   )
 (  0.000000   0.000000     0.000000   0.000000    -0.000000   0.000000   )
 ( -0.000000   0.000000    -0.000000   0.000000     0.000000   0.000000   )
 ( -0.000000   0.000000    -0.000000   0.000000     0.000000   0.000000   )
 ( -0.000000   0.000000    -0.000000   0.000000     0.000000   0.000000   )
 ( -0.000000   0.000000     0.000000   0.000000    -0.000000   0.000000   )
 ( -0.000000   0.000000     0.000000   0.000000    -0.000000   0.000000   )
 ( -0.000000   0.000000     0.000000   0.000000    -0.000000   0.000000   )
 (  0.000000   0.000000    -0.000000   0.000000    -0.000000   0.000000   )
 (  0.000000   0.000000     0.000000   0.000000    -0.000000   0.000000   )
 ( -0.000000   0.000000     0.000000   0.000000    -0.000000   0.000000   )
 (  0.000000   0.000000     0.000000   0.000000    -0.000000   0.000000   )
 ( -0.000000   0.000000    -0.000000   0.000000    -0.000000   0.000000   )
 ( -0.000000   0.000000     0.000000   0.000000    -0.000000   0.000000   )
 ( -0.000000   0.000000    -0.000000   0.000000     0.000000   0.000000   )
 (  0.000000   0.000000    -0.000000   0.000000     0.000000   0.000000   )
 ( -0.000000   0.000000    -0.000000   0.000000     0.000000   0.000000   )
 ( -0.000000   0.000000     0.000000   0.000000     0.000000   0.000000   )
 (  0.000000   0.000000     0.000000   0.000000     0.000000   0.000000   )
 ( -0.000000   0.000000    -0.000000   0.000000     0.000000   0.000000   )
 ( -0.000000   0.000000     0.000000   0.000000    -0.000000   0.000000   )
 (  0.000000   0.000000     0.000000   0.000000    -0.000000   0.000000   )
 (  0.000000   0.000000    -0.000000   0.000000    -0.000000   0.000000   )
 ( -0.000000   0.000000    -0.000000   0.000000    -0.000000   0.000000   )
 ( -0.000000   0.000000    -0.000000   0.000000    -0.000000   0.000000   )
 (  0.000000   0.000000     0.000000   0.000000    -0.000000   0.000000   )
 (  0.000000   0.000000    -0.000000   0.000000     0.000000   0.000000   )
 (  0.000000   0.000000    -0.000000   0.000000     0.000000   0.000000   )
 (  0.000000   0.000000     0.000000   0.000000     0.000000   0.000000   )
 (  0.000000   0.000000     0.000000   0.000000     0.000000   0.000000   )
 (  0.000000   0.000000    -0.000000   0.000000     0.000000   0.000000   )
 (  0.000000   0.000000    -0.000000   0.000000     0.000000   0.000000   )
 ( -0.000000   0.000000     0.000000   0.000000    -0.000000   0.000000   )
 (  0.000000   0.000000    -0.000000   0.000000    -0.000000   0.000000   )
 ( -0.000000   0.000000    -0.000000   0.000000    -0.000000   0.000000   )
 ( -0.000000   0.000000    -0.000000   0.000000    -0.000000   0.000000   )
 ( -0.000000   0.000000    -0.000000   0.000000    -0.000000   0.000000   )
 ( -0.000000   0.000000    -0.000000   0.000000    -0.000000   0.000000   )
 (  0.000000   0.000000     0.000000   0.000000    -0.000000   0.000000   )
 ( -0.000000   0.000000    -0.000000   0.000000    -0.000000   0.000000   )
 (  0.000000   0.000000    -0.000000   0.000000    -0.000000   0.000000   )
 (  0.000000   0.000000    -0.000000   0.000000    -0.000000   0.000000   )
 (  0.000000   0.000000     0.000000   0.000000    -0.000000   0.000000   )
 (  0.000000   0.000000    -0.000000   0.000000    -0.000000   0.000000   )
 (  0.000000   0.000000    -0.000000   0.000000     0.000000   0.000000   )
 (  0.000000   0.000000     0.000000   0.000000     0.000000   0.000000   )
 (  0.000000   0.000000     0.000000   0.000000    -0.000000   0.000000   )
 ( -0.000000   0.000000    -0.000000   0.000000     0.000000   0.000000   )
 (  0.000000   0.000000     0.000000   0.000000     0.000000   0.000000   )
 ( -0.000000   0.000000    -0.000000   0.000000     0.000000   0.000000   )
 ( -0.000000   0.000000    -0.000000   0.000000     0.000000   0.000000   )
 (  0.000000   0.000000     0.000000   0.000000     0.000000   0.000000   )
 (  0.000000   0.000000    -0.000000   0.000000     0.000000   0.000000   )
 ( -0.000000   0.000000     0.000000   0.000000    -0.000000   0.000000   )
 (  0.000000   0.000000     0.000000   0.000000    -0.000000   0.000000   )
 (  0.000022   0.000000     0.000017   0.000000    -0.000211   0.000000   )
 ( -0.000000   0.000000     0.000000   0.000000    -0.000000   0.000000   )
 ( -0.000000   0.000000    -0.000000   0.000000    -0.000000   0.000000   )
 ( -0.000000   0.000000     0.000000   0.000000     0.000000   0.000000   )
 (  0.000000   0.000000     0.000000   0.000000    -0.000000   0.000000   )
 ( -0.000000   0.000000    -0.000000   0.000000    -0.000000   0.000000   )
 (  0.000000   0.000000     0.000000   0.000000    -0.000000   0.000000   )
 (  0.000000   0.000000     0.000000   0.000000    -0.000000   0.000000   )
 (  0.000000   0.000000    -0.000000   0.000000    -0.000000   0.000000   )
 (  0.000000   0.000000    -0.000000   0.000000     0.000000   0.000000   )
 ( -0.000000   0.000000     0.000000   0.000000     0.000000   0.000000   )
 ( -0.000000   0.000000     0.000000   0.000000     0.000000   0.000000   )
 ( -0.000000   0.000000    -0.000000   0.000000     0.000000   0.000000   )
 (  0.000000   0.000000     0.000000   0.000000    -0.000000   0.000000   )
 ( -0.000000   0.000000     0.000000   0.000000    -0.000000   0.000000   )
 ( -0.000000   0.000000    -0.000000   0.000000    -0.000000   0.000000   )
 (  0.000007   0.000000    -0.000006   0.000000     0.000174   0.000000   )
 (  0.001938   0.000000    -0.002101   0.000000    -0.062431   0.000000   )
 (  0.000001   0.000000     0.000001   0.000000     0.000162   0.000000   )
 ( -0.000000   0.000000     0.000000   0.000000    -0.000000   0.000000   )
 ( -0.000000   0.000000     0.000000   0.000000    -0.000000   0.000000   )
 ( -0.000000   0.000000     0.000000   0.000000    -0.000000   0.000000   )
 (  0.000000   0.000000    -0.000000   0.000000     0.000000   0.000000   )
 ( -0.000000   0.000000     0.000000   0.000000     0.000000   0.000000   )
 (  0.000000   0.000000     0.000000   0.000000     0.000000   0.000000   )
 ( -0.000000   0.000000    -0.000000   0.000000     0.000000   0.000000   )
 ( -0.000000   0.000000     0.000000   0.000000     0.000000   0.000000   )
 ( -0.000000   0.000000     0.000000   0.000000     0.000000   0.000000   )
 ( -0.000000   0.000000     0.000000   0.000000    -0.000000   0.000000   )
 ( -0.000000   0.000000     0.000000   0.000000    -0.000000   0.000000   )
 ( -0.000000   0.000000    -0.000000   0.000000    -0.000000   0.000000   )
 (  0.000000   0.000000    -0.000000   0.000000     0.000000   0.000000   )
 (  0.000000   0.000000     0.000000   0.000000     0.000000   0.000000   )
 (  0.000000   0.000000     0.000000   0.000000     0.000000   0.000000   )
 ( -0.000000   0.000000     0.000000   0.000000    -0.000000   0.000000   )
 ( -0.000000   0.000000     0.000000   0.000000     0.000000   0.000000   )
 ( -0.000000   0.000000     0.000000   0.000000    -0.000000   0.000000   )
 ( -0.000000   0.000000     0.000000   0.000000    -0.000000   0.000000   )
 ( -0.000000   0.000000     0.000000   0.000000    -0.000000   0.000000   )
 (  0.000000   0.000000    -0.000000   0.000000    -0.000000   0.000000   )
 ( -0.000000   0.000000    -0.000000   0.000000    -0.000000   0.000000   )
 ( -0.000000   0.000000     0.000000   0.000000    -0.000000   0.000000   )
 (  0.000000   0.000000    -0.000000   0.000000    -0.000000   0.000000   )
 ( -0.000000   0.000000    -0.000000   0.000000    -0.000000   0.000000   )
 ( -0.000000   0.000000     0.000000   0.000000    -0.000000   0.000000   )
 (  0.000000   0.000000     0.000000   0.000000    -0.000000   0.000000   )
 (  0.000000   0.000000     0.000000   0.000000     0.000000   0.000000   )
 ( -0.000000   0.000000    -0.000000   0.000000    -0.000000   0.000000   )
 (  0.000000   0.000000    -0.000000   0.000000    -0.000000   0.000000   )
 ( -0.000000   0.000000    -0.000000   0.000000     0.000000   0.000000   )
 (  0.000000   0.000000     0.000000   0.000000     0.000000   0.000000   )
 ( -0.000000   0.000000     0.000000   0.000000     0.000000   0.000000   )
 ( -0.000000   0.000000     0.000000   0.000000     0.000000   0.000000   )
 (  0.000000   0.000000    -0.000000   0.000000     0.000000   0.000000   )
 ( -0.000000   0.000000    -0.000000   0.000000     0.000000   0.000000   )
 ( -0.000000   0.000000     0.000000   0.000000     0.000000   0.000000   )
 (  0.000000   0.000000     0.000000   0.000000    -0.000000   0.000000   )
 ( -0.000000   0.000000    -0.000000   0.000000    -0.000000   0.000000   )
 ( -0.000000   0.000000    -0.000000   0.000000    -0.000000   0.000000   )
 ( -0.000000   0.000000     0.000000   0.000000    -0.000000   0.000000   )
 ( -0.000000   0.000000     0.000000   0.000000    -0.000000   0.000000   )
 (  0.000000   0.000000    -0.000000   0.000000     0.000000   0.000000   )
 ( -0.000000   0.000000     0.000000   0.000000     0.000000   0.000000   )
 (  0.000000   0.000000    -0.000000   0.000000     0.000000   0.000000   )
 (  0.000000   0.000000     0.000000   0.000000     0.000000   0.000000   )
 ( -0.000000   0.000000    -0.000000   0.000000     0.000000   0.000000   )
 (  0.000000   0.000000     0.000000   0.000000     0.000000   0.000000   )
 ( -0.000000   0.000000    -0.000000   0.000000    -0.000000   0.000000   )
 (  0.000000   0.000000     0.000000   0.000000     0.000000   0.000000   )
 ( -0.000000   0.000000     0.000000   0.000000    -0.000000   0.000000   )
 (  0.000000   0.000000     0.000000   0.000000    -0.000000   0.000000   )
 ( -0.000000   0.000000    -0.000000   0.000000     0.000000   0.000000   )
 ( -0.000000   0.000000     0.000000   0.000000    -0.000000   0.000000   )
 ( -0.000000   0.000000     0.000000   0.000000    -0.000000   0.000000   )
 ( -0.000000   0.000000    -0.000000   0.000000     0.000000   0.000000   )
 ( -0.000000   0.000000    -0.000000   0.000000     0.000000   0.000000   )
 ( -0.000000   0.000000    -0.000000   0.000000     0.000000   0.000000   )
 ( -0.000000   0.000000     0.000000   0.000000     0.000000   0.000000   )
 ( -0.000000   0.000000     0.000000   0.000000     0.000000   0.000000   )
 (  0.000000   0.000000     0.000000   0.000000    -0.000000   0.000000   )
 (  0.000000   0.000000    -0.000000   0.000000     0.000000   0.000000   )
 ( -0.000000   0.000000    -0.000000   0.000000    -0.000000   0.000000   )
 (  0.000000   0.000000    -0.000000   0.000000    -0.000000   0.000000   )
 (  0.000000   0.000000    -0.000000   0.000000     0.000000   0.000000   )
 (  0.000000   0.000000     0.000000   0.000000    -0.000000   0.000000   )
 (  0.000000   0.000000     0.000000   0.000000    -0.000000   0.000000   )
 ( -0.000000   0.000000    -0.000000   0.000000    -0.000000   0.000000   )
 ( -0.000000   0.000000     0.000000   0.000000    -0.000000   0.000000   )
 ( -0.000000   0.000000    -0.000000   0.000000    -0.000000   0.000000   )
 (  0.000000   0.000000     0.000000   0.000000    -0.000000   0.000000   )
 ( -0.000000   0.000000    -0.000000   0.000000    -0.000000   0.000000   )
 (  0.000000   0.000000    -0.000000   0.000000     0.000000   0.000000   )
 ( -0.000000   0.000000    -0.000000   0.000000    -0.000000   0.000000   )
 (  0.000371   0.000000    -0.000890   0.000000     0.004535   0.000000   )
 (  0.000000   0.000000    -0.000000   0.000000    -0.000000   0.000000   )
 (  0.000000   0.000000    -0.000000   0.000000    -0.000000   0.000000   )
 (  0.000000   0.000000     0.000000   0.000000    -0.000000   0.000000   )
 ( -0.000000   0.000000    -0.000000   0.000000    -0.000000   0.000000   )
 (  0.000000   0.000000    -0.000000   0.000000    -0.000000   0.000000   )
 (  0.000000   0.000000     0.000000   0.000000    -0.000000   0.000000   )
 (  0.000020   0.000000     0.000055   0.000000    -0.002589   0.000000   )
 ( -0.028919   0.000000     0.028050   0.000000     0.997215   0.000000   )
 ( -0.000026   0.000000    -0.000062   0.000000    -0.002437   0.000000   )
     freq (  484) =     109.519192 [THz] =    3653.167025 [cm-1]
 (  0.000000   0.000000     0.000000   0.000000    -0.000000   0.000000   )
 ( -0.000000   0.000000    -0.000000   0.000000    -0.000000   0.000000   )
 (  0.000000   0.000000     0.000000   0.000000     0.000000   0.000000   )
 ( -0.000000   0.000000     0.000000   0.000000    -0.000000   0.000000   )
 (  0.000000   0.000000     0.000000   0.000000    -0.000000   0.000000   )
 (  0.000000   0.000000     0.000000   0.000000    -0.000000   0.000000   )
 (  0.000000   0.000000    -0.000000   0.000000     0.000000   0.000000   )
 ( -0.000000   0.000000    -0.000000   0.000000     0.000000   0.000000   )
 ( -0.000000   0.000000     0.000000   0.000000     0.000000   0.000000   )
 ( -0.000000   0.000000    -0.000000   0.000000    -0.000000   0.000000   )
 ( -0.000000   0.000000    -0.000000   0.000000    -0.000000   0.000000   )
 (  0.000000   0.000000    -0.000000   0.000000    -0.000000   0.000000   )
 ( -0.000000   0.000000    -0.000000   0.000000    -0.000000   0.000000   )
 (  0.000000   0.000000     0.000000   0.000000    -0.000000   0.000000   )
 ( -0.000000   0.000000     0.000000   0.000000    -0.000000   0.000000   )
 (  0.000000   0.000000     0.000000   0.000000    -0.000000   0.000000   )
 (  0.000000   0.000000    -0.000000   0.000000    -0.000000   0.000000   )
 ( -0.000000   0.000000     0.000000   0.000000    -0.000000   0.000000   )
 (  0.000000   0.000000     0.000000   0.000000     0.000000   0.000000   )
 (  0.000000   0.000000    -0.000000   0.000000     0.000000   0.000000   )
 (  0.000000   0.000000     0.000000   0.000000    -0.000000   0.000000   )
 ( -0.000000   0.000000     0.000000   0.000000     0.000000   0.000000   )
 ( -0.000000   0.000000     0.000000   0.000000     0.000000   0.000000   )
 ( -0.000000   0.000000    -0.000000   0.000000     0.000000   0.000000   )
 ( -0.000000   0.000000     0.000000   0.000000     0.000000   0.000000   )
 ( -0.000000   0.000000    -0.000000   0.000000    -0.000000   0.000000   )
 ( -0.000000   0.000000    -0.000000   0.000000    -0.000000   0.000000   )
 (  0.000000   0.000000    -0.000000   0.000000    -0.000000   0.000000   )
 ( -0.000000   0.000000     0.000000   0.000000    -0.000000   0.000000   )
 (  0.000000   0.000000    -0.000000   0.000000     0.000000   0.000000   )
 (  0.000000   0.000000     0.000000   0.000000     0.000000   0.000000   )
 (  0.000000   0.000000     0.000000   0.000000     0.000000   0.000000   )
 (  0.000000   0.000000     0.000000   0.000000     0.000000   0.000000   )
 (  0.000000   0.000000     0.000000   0.000000    -0.000000   0.000000   )
 ( -0.000000   0.000000     0.000000   0.000000     0.000000   0.000000   )
 ( -0.000000   0.000000     0.000000   0.000000     0.000000   0.000000   )
 (  0.000000   0.000000    -0.000000   0.000000    -0.000000   0.000000   )
 ( -0.000000   0.000000    -0.000000   0.000000    -0.000000   0.000000   )
 (  0.000000   0.000000     0.000000   0.000000     0.000000   0.000000   )
 ( -0.000000   0.000000     0.000000   0.000000     0.000000   0.000000   )
 ( -0.000000   0.000000    -0.000000   0.000000    -0.000000   0.000000   )
 (  0.000000   0.000000    -0.000000   0.000000    -0.000000   0.000000   )
 (  0.000000   0.000000    -0.000000   0.000000     0.000000   0.000000   )
 ( -0.000000   0.000000     0.000000   0.000000    -0.000000   0.000000   )
 (  0.000000   0.000000     0.000000   0.000000    -0.000000   0.000000   )
 ( -0.000000   0.000000     0.000000   0.000000    -0.000000   0.000000   )
 (  0.000000   0.000000     0.000000   0.000000    -0.000000   0.000000   )
 (  0.000000   0.000000     0.000000   0.000000    -0.000000   0.000000   )
 (  0.000000   0.000000     0.000000   0.000000    -0.000000   0.000000   )
 (  0.000000   0.000000     0.000000   0.000000     0.000000   0.000000   )
 ( -0.000000   0.000000     0.000000   0.000000    -0.000000   0.000000   )
 ( -0.000000   0.000000    -0.000000   0.000000     0.000000   0.000000   )
 (  0.000000   0.000000    -0.000000   0.000000     0.000000   0.000000   )
 ( -0.000000   0.000000    -0.000000   0.000000     0.000000   0.000000   )
 ( -0.000000   0.000000    -0.000000   0.000000     0.000000   0.000000   )
 (  0.000000   0.000000    -0.000000   0.000000     0.000000   0.000000   )
 ( -0.000000   0.000000    -0.000000   0.000000     0.000000   0.000000   )
 ( -0.000000   0.000000    -0.000000   0.000000    -0.000000   0.000000   )
 (  0.000000   0.000000     0.000000   0.000000    -0.000000   0.000000   )
 (  0.000021   0.000000    -0.000012   0.000000    -0.000071   0.000000   )
 ( -0.000000   0.000000    -0.000000   0.000000     0.000000   0.000000   )
 ( -0.000000   0.000000    -0.000000   0.000000    -0.000000   0.000000   )
 (  0.000000   0.000000    -0.000000   0.000000    -0.000000   0.000000   )
 (  0.000000   0.000000     0.000000   0.000000    -0.000000   0.000000   )
 ( -0.000000   0.000000     0.000000   0.000000    -0.000000   0.000000   )
 (  0.000000   0.000000     0.000000   0.000000    -0.000000   0.000000   )
 (  0.000000   0.000000    -0.000000   0.000000     0.000000   0.000000   )
 ( -0.000000   0.000000     0.000000   0.000000    -0.000000   0.000000   )
 (  0.000000   0.000000     0.000000   0.000000    -0.000000   0.000000   )
 (  0.000000   0.000000    -0.000000   0.000000     0.000000   0.000000   )
 ( -0.000000   0.000000    -0.000000   0.000000     0.000000   0.000000   )
 ( -0.000000   0.000000    -0.000000   0.000000    -0.000000   0.000000   )
 (  0.000000   0.000000    -0.000000   0.000000    -0.000000   0.000000   )
 ( -0.000000   0.000000    -0.000000   0.000000    -0.000000   0.000000   )
 ( -0.000000   0.000000    -0.000000   0.000000    -0.000000   0.000000   )
 ( -0.000035   0.000000    -0.000013   0.000000     0.002412   0.000000   )
 (  0.000004   0.000000    -0.000002   0.000000    -0.000137   0.000000   )
 ( -0.000358   0.000000    -0.000715   0.000000    -0.062180   0.000000   )
 ( -0.000000   0.000000    -0.000000   0.000000    -0.000000   0.000000   )
 ( -0.000000   0.000000    -0.000000   0.000000     0.000000   0.000000   )
 (  0.000000   0.000000    -0.000000   0.000000     0.000000   0.000000   )
 (  0.000000   0.000000     0.000000   0.000000     0.000000   0.000000   )
 (  0.000000   0.000000    -0.000000   0.000000     0.000000   0.000000   )
 ( -0.000000   0.000000    -0.000000   0.000000     0.000000   0.000000   )
 ( -0.000000   0.000000    -0.000000   0.000000    -0.000000   0.000000   )
 (  0.000000   0.000000    -0.000000   0.000000     0.000000   0.000000   )
 ( -0.000000   0.000000    -0.000000   0.000000     0.000000   0.000000   )
 (  0.000000   0.000000    -0.000000   0.000000    -0.000000   0.000000   )
 ( -0.000000   0.000000    -0.000000   0.000000    -0.000000   0.000000   )
 ( -0.000000   0.000000    -0.000000   0.000000     0.000000   0.000000   )
 ( -0.000000   0.000000     0.000000   0.000000     0.000000   0.000000   )
 (  0.000000   0.000000     0.000000   0.000000     0.000000   0.000000   )
 (  0.000000   0.000000    -0.000000   0.000000     0.000000   0.000000   )
 ( -0.000000   0.000000    -0.000000   0.000000    -0.000000   0.000000   )
 ( -0.000000   0.000000    -0.000000   0.000000     0.000000   0.000000   )
 ( -0.000000   0.000000    -0.000000   0.000000     0.000000   0.000000   )
 ( -0.000000   0.000000     0.000000   0.000000    -0.000000   0.000000   )
 ( -0.000000   0.000000    -0.000000   0.000000    -0.000000   0.000000   )
 (  0.000000   0.000000    -0.000000   0.000000    -0.000000   0.000000   )
 ( -0.000000   0.000000    -0.000000   0.000000    -0.000000   0.000000   )
 (  0.000000   0.000000     0.000000   0.000000    -0.000000   0.000000   )
 (  0.000000   0.000000    -0.000000   0.000000    -0.000000   0.000000   )
 ( -0.000000   0.000000     0.000000   0.000000    -0.000000   0.000000   )
 (  0.000000   0.000000     0.000000   0.000000    -0.000000   0.000000   )
 ( -0.000000   0.000000    -0.000000   0.000000    -0.000000   0.000000   )
 (  0.000000   0.000000     0.000000   0.000000    -0.000000   0.000000   )
 (  0.000000   0.000000     0.000000   0.000000    -0.000000   0.000000   )
 ( -0.000000   0.000000    -0.000000   0.000000    -0.000000   0.000000   )
 (  0.000000   0.000000    -0.000000   0.000000    -0.000000   0.000000   )
 (  0.000000   0.000000    -0.000000   0.000000     0.000000   0.000000   )
 ( -0.000000   0.000000     0.000000   0.000000     0.000000   0.000000   )
 (  0.000000   0.000000     0.000000   0.000000     0.000000   0.000000   )
 (  0.000000   0.000000    -0.000000   0.000000     0.000000   0.000000   )
 ( -0.000000   0.000000    -0.000000   0.000000     0.000000   0.000000   )
 (  0.000000   0.000000    -0.000000   0.000000    -0.000000   0.000000   )
 ( -0.000000   0.000000    -0.000000   0.000000     0.000000   0.000000   )
 (  0.000000   0.000000    -0.000000   0.000000    -0.000000   0.000000   )
 ( -0.000000   0.000000     0.000000   0.000000     0.000000   0.000000   )
 ( -0.000000   0.000000    -0.000000   0.000000    -0.000000   0.000000   )
 (  0.000000   0.000000    -0.000000   0.000000     0.000000   0.000000   )
 (  0.000000   0.000000     0.000000   0.000000     0.000000   0.000000   )
 (  0.000000   0.000000     0.000000   0.000000     0.000000   0.000000   )
 ( -0.000000   0.000000    -0.000000   0.000000     0.000000   0.000000   )
 (  0.000000   0.000000    -0.000000   0.000000     0.000000   0.000000   )
 ( -0.000000   0.000000     0.000000   0.000000     0.000000   0.000000   )
 ( -0.000000   0.000000     0.000000   0.000000     0.000000   0.000000   )
 ( -0.000000   0.000000    -0.000000   0.000000    -0.000000   0.000000   )
 (  0.000000   0.000000    -0.000000   0.000000    -0.000000   0.000000   )
 ( -0.000000   0.000000     0.000000   0.000000     0.000000   0.000000   )
 (  0.000000   0.000000     0.000000   0.000000     0.000000   0.000000   )
 (  0.000000   0.000000    -0.000000   0.000000    -0.000000   0.000000   )
 ( -0.000000   0.000000    -0.000000   0.000000    -0.000000   0.000000   )
 (  0.000000   0.000000    -0.000000   0.000000     0.000000   0.000000   )
 ( -0.000000   0.000000    -0.000000   0.000000    -0.000000   0.000000   )
 (  0.000000   0.000000    -0.000000   0.000000     0.000000   0.000000   )
 ( -0.000000   0.000000    -0.000000   0.000000    -0.000000   0.000000   )
 ( -0.000000   0.000000    -0.000000   0.000000     0.000000   0.000000   )
 (  0.000000   0.000000    -0.000000   0.000000     0.000000   0.000000   )
 (  0.000000   0.000000     0.000000   0.000000    -0.000000   0.000000   )
 ( -0.000000   0.000000     0.000000   0.000000    -0.000000   0.000000   )
 (  0.000000   0.000000     0.000000   0.000000    -0.000000   0.000000   )
 (  0.000000   0.000000     0.000000   0.000000    -0.000000   0.000000   )
 ( -0.000000   0.000000     0.000000   0.000000    -0.000000   0.000000   )
 (  0.000000   0.000000     0.000000   0.000000    -0.000000   0.000000   )
 (  0.000000   0.000000    -0.000000   0.000000     0.000000   0.000000   )
 ( -0.000000   0.000000     0.000000   0.000000    -0.000000   0.000000   )
 (  0.000000   0.000000     0.000000   0.000000    -0.000000   0.000000   )
 ( -0.000000   0.000000     0.000000   0.000000    -0.000000   0.000000   )
 (  0.000000   0.000000    -0.000000   0.000000     0.000000   0.000000   )
 (  0.000000   0.000000     0.000000   0.000000    -0.000000   0.000000   )
 (  0.000000   0.000000     0.000000   0.000000     0.000000   0.000000   )
 ( -0.000000   0.000000    -0.000000   0.000000    -0.000000   0.000000   )
 ( -0.000304   0.000000     0.000531   0.000000     0.001712   0.000000   )
 ( -0.000000   0.000000     0.000000   0.000000    -0.000000   0.000000   )
 (  0.000000   0.000000     0.000000   0.000000    -0.000000   0.000000   )
 (  0.000000   0.000000     0.000000   0.000000    -0.000000   0.000000   )
 ( -0.000000   0.000000     0.000000   0.000000    -0.000000   0.000000   )
 (  0.000000   0.000000     0.000000   0.000000    -0.000000   0.000000   )
 (  0.000000   0.000000     0.000000   0.000000    -0.000000   0.000000   )
 (  0.000803   0.000000     0.000365   0.000000    -0.038534   0.000000   )
 ( -0.000082   0.000000     0.000041   0.000000     0.002345   0.000000   )
 (  0.005043   0.000000     0.018696   0.000000     0.997125   0.000000   )
     freq (  485) =     109.608950 [THz] =    3656.161037 [cm-1]
 (  0.000000   0.000000     0.000000   0.000000     0.000000   0.000000   )
 ( -0.000000   0.000000    -0.000000   0.000000     0.000000   0.000000   )
 (  0.000000   0.000000     0.000000   0.000000    -0.000000   0.000000   )
 (  0.000000   0.000000     0.000000   0.000000     0.000000   0.000000   )
 ( -0.000000   0.000000     0.000000   0.000000     0.000000   0.000000   )
 (  0.000000   0.000000    -0.000000   0.000000     0.000000   0.000000   )
 (  0.000000   0.000000     0.000000   0.000000    -0.000000   0.000000   )
 ( -0.000000   0.000000    -0.000000   0.000000    -0.000000   0.000000   )
 ( -0.000000   0.000000     0.000000   0.000000    -0.000000   0.000000   )
 ( -0.000000   0.000000    -0.000000   0.000000     0.000000   0.000000   )
 ( -0.000000   0.000000    -0.000000   0.000000     0.000000   0.000000   )
 ( -0.000000   0.000000     0.000000   0.000000     0.000000   0.000000   )
 ( -0.000000   0.000000     0.000000   0.000000     0.000000   0.000000   )
 ( -0.000000   0.000000    -0.000000   0.000000     0.000000   0.000000   )
 (  0.000000   0.000000    -0.000000   0.000000     0.000000   0.000000   )
 ( -0.000000   0.000000    -0.000000   0.000000     0.000000   0.000000   )
 (  0.000000   0.000000     0.000000   0.000000     0.000000   0.000000   )
 (  0.000000   0.000000    -0.000000   0.000000     0.000000   0.000000   )
 (  0.000000   0.000000     0.000000   0.000000    -0.000000   0.000000   )
 (  0.000000   0.000000    -0.000000   0.000000    -0.000000   0.000000   )
 ( -0.000000   0.000000    -0.000000   0.000000    -0.000000   0.000000   )
 (  0.000000   0.000000     0.000000   0.000000    -0.000000   0.000000   )
 ( -0.000000   0.000000     0.000000   0.000000    -0.000000   0.000000   )
 (  0.000000   0.000000     0.000000   0.000000    -0.000000   0.000000   )
 ( -0.000000   0.000000     0.000000   0.000000     0.000000   0.000000   )
 (  0.000000   0.000000    -0.000000   0.000000    -0.000000   0.000000   )
 (  0.000000   0.000000    -0.000000   0.000000     0.000000   0.000000   )
 ( -0.000000   0.000000     0.000000   0.000000     0.000000   0.000000   )
 ( -0.000000   0.000000    -0.000000   0.000000     0.000000   0.000000   )
 (  0.000000   0.000000    -0.000000   0.000000     0.000000   0.000000   )
 (  0.000000   0.000000     0.000000   0.000000    -0.000000   0.000000   )
 (  0.000000   0.000000     0.000000   0.000000    -0.000000   0.000000   )
 (  0.000000   0.000000    -0.000000   0.000000    -0.000000   0.000000   )
 (  0.000000   0.000000     0.000000   0.000000    -0.000000   0.000000   )
 (  0.000000   0.000000     0.000000   0.000000    -0.000000   0.000000   )
 (  0.000000   0.000000     0.000000   0.000000    -0.000000   0.000000   )
 (  0.000000   0.000000    -0.000000   0.000000    -0.000000   0.000000   )
 ( -0.000000   0.000000    -0.000000   0.000000     0.000000   0.000000   )
 ( -0.000000   0.000000     0.000000   0.000000     0.000000   0.000000   )
 ( -0.000000   0.000000     0.000000   0.000000     0.000000   0.000000   )
 (  0.000000   0.000000    -0.000000   0.000000     0.000000   0.000000   )
 (  0.000000   0.000000     0.000000   0.000000    -0.000000   0.000000   )
 (  0.000000   0.000000    -0.000000   0.000000     0.000000   0.000000   )
 (  0.000000   0.000000     0.000000   0.000000     0.000000   0.000000   )
 (  0.000000   0.000000     0.000000   0.000000     0.000000   0.000000   )
 (  0.000000   0.000000     0.000000   0.000000     0.000000   0.000000   )
 (  0.000000   0.000000    -0.000000   0.000000     0.000000   0.000000   )
 ( -0.000000   0.000000     0.000000   0.000000     0.000000   0.000000   )
 (  0.000000   0.000000     0.000000   0.000000     0.000000   0.000000   )
 (  0.000000   0.000000     0.000000   0.000000     0.000000   0.000000   )
 (  0.000000   0.000000    -0.000000   0.000000     0.000000   0.000000   )
 ( -0.000000   0.000000     0.000000   0.000000    -0.000000   0.000000   )
 ( -0.000000   0.000000    -0.000000   0.000000    -0.000000   0.000000   )
 (  0.000000   0.000000    -0.000000   0.000000    -0.000000   0.000000   )
 ( -0.000000   0.000000    -0.000000   0.000000    -0.000000   0.000000   )
 ( -0.000000   0.000000     0.000000   0.000000    -0.000000   0.000000   )
 ( -0.000000   0.000000    -0.000000   0.000000    -0.000000   0.000000   )
 ( -0.000000   0.000000    -0.000000   0.000000     0.000000   0.000000   )
 (  0.000000   0.000000     0.000000   0.000000     0.000000   0.000000   )
 ( -0.000024   0.000000    -0.000004   0.000000    -0.000018   0.000000   )
 ( -0.000000   0.000000    -0.000000   0.000000     0.000000   0.000000   )
 ( -0.000000   0.000000    -0.000000   0.000000    -0.000000   0.000000   )
 ( -0.000000   0.000000     0.000000   0.000000     0.000000   0.000000   )
 (  0.000000   0.000000    -0.000000   0.000000     0.000000   0.000000   )
 (  0.000000   0.000000     0.000000   0.000000     0.000000   0.000000   )
 ( -0.000000   0.000000     0.000000   0.000000     0.000000   0.000000   )
 (  0.000000   0.000000     0.000000   0.000000    -0.000000   0.000000   )
 ( -0.000000   0.000000    -0.000000   0.000000    -0.000000   0.000000   )
 (  0.000000   0.000000     0.000000   0.000000     0.000000   0.000000   )
 ( -0.000000   0.000000    -0.000000   0.000000    -0.000000   0.000000   )
 (  0.000000   0.000000    -0.000000   0.000000    -0.000000   0.000000   )
 ( -0.000000   0.000000     0.000000   0.000000    -0.000000   0.000000   )
 ( -0.000000   0.000000    -0.000000   0.000000     0.000000   0.000000   )
 (  0.000000   0.000000    -0.000000   0.000000     0.000000   0.000000   )
 ( -0.000000   0.000000     0.000000   0.000000     0.000000   0.000000   )
 ( -0.000917   0.000000    -0.000384   0.000000     0.062146   0.000000   )
 (  0.000001   0.000000     0.000007   0.000000     0.000158   0.000000   )
 (  0.000015   0.000000     0.000029   0.000000     0.002394   0.000000   )
 ( -0.000000   0.000000    -0.000000   0.000000     0.000000   0.000000   )
 ( -0.000000   0.000000    -0.000000   0.000000     0.000000   0.000000   )
 ( -0.000000   0.000000    -0.000000   0.000000    -0.000000   0.000000   )
 ( -0.000000   0.000000     0.000000   0.000000    -0.000000   0.000000   )
 (  0.000000   0.000000     0.000000   0.000000    -0.000000   0.000000   )
 (  0.000000   0.000000    -0.000000   0.000000    -0.000000   0.000000   )
 ( -0.000000   0.000000     0.000000   0.000000    -0.000000   0.000000   )
 ( -0.000000   0.000000    -0.000000   0.000000    -0.000000   0.000000   )
 ( -0.000000   0.000000    -0.000000   0.000000    -0.000000   0.000000   )
 ( -0.000000   0.000000    -0.000000   0.000000    -0.000000   0.000000   )
 ( -0.000000   0.000000    -0.000000   0.000000     0.000000   0.000000   )
 ( -0.000000   0.000000    -0.000000   0.000000     0.000000   0.000000   )
 ( -0.000000   0.000000    -0.000000   0.000000    -0.000000   0.000000   )
 (  0.000000   0.000000     0.000000   0.000000    -0.000000   0.000000   )
 (  0.000000   0.000000    -0.000000   0.000000    -0.000000   0.000000   )
 ( -0.000000   0.000000    -0.000000   0.000000    -0.000000   0.000000   )
 ( -0.000000   0.000000    -0.000000   0.000000    -0.000000   0.000000   )
 ( -0.000000   0.000000    -0.000000   0.000000    -0.000000   0.000000   )
 ( -0.000000   0.000000    -0.000000   0.000000     0.000000   0.000000   )
 (  0.000000   0.000000     0.000000   0.000000     0.000000   0.000000   )
 ( -0.000000   0.000000     0.000000   0.000000     0.000000   0.000000   )
 (  0.000000   0.000000     0.000000   0.000000     0.000000   0.000000   )
 ( -0.000000   0.000000    -0.000000   0.000000     0.000000   0.000000   )
 ( -0.000000   0.000000    -0.000000   0.000000     0.000000   0.000000   )
 ( -0.000000   0.000000     0.000000   0.000000     0.000000   0.000000   )
 (  0.000000   0.000000     0.000000   0.000000     0.000000   0.000000   )
 (  0.000000   0.000000    -0.000000   0.000000     0.000000   0.000000   )
 (  0.000000   0.000000    -0.000000   0.000000     0.000000   0.000000   )
 ( -0.000000   0.000000     0.000000   0.000000     0.000000   0.000000   )
 (  0.000000   0.000000    -0.000000   0.000000     0.000000   0.000000   )
 (  0.000000   0.000000     0.000000   0.000000    -0.000000   0.000000   )
 ( -0.000000   0.000000    -0.000000   0.000000    -0.000000   0.000000   )
 ( -0.000000   0.000000    -0.000000   0.000000    -0.000000   0.000000   )
 ( -0.000000   0.000000    -0.000000   0.000000    -0.000000   0.000000   )
 ( -0.000000   0.000000     0.000000   0.000000    -0.000000   0.000000   )
 (  0.000000   0.000000     0.000000   0.000000    -0.000000   0.000000   )
 ( -0.000000   0.000000     0.000000   0.000000     0.000000   0.000000   )
 ( -0.000000   0.000000    -0.000000   0.000000     0.000000   0.000000   )
 ( -0.000000   0.000000     0.000000   0.000000     0.000000   0.000000   )
 ( -0.000000   0.000000     0.000000   0.000000     0.000000   0.000000   )
 (  0.000000   0.000000    -0.000000   0.000000     0.000000   0.000000   )
 ( -0.000000   0.000000    -0.000000   0.000000     0.000000   0.000000   )
 ( -0.000000   0.000000    -0.000000   0.000000    -0.000000   0.000000   )
 (  0.000000   0.000000    -0.000000   0.000000    -0.000000   0.000000   )
 (  0.000000   0.000000    -0.000000   0.000000    -0.000000   0.000000   )
 (  0.000000   0.000000     0.000000   0.000000    -0.000000   0.000000   )
 (  0.000000   0.000000     0.000000   0.000000    -0.000000   0.000000   )
 ( -0.000000   0.000000    -0.000000   0.000000    -0.000000   0.000000   )
 ( -0.000000   0.000000     0.000000   0.000000    -0.000000   0.000000   )
 ( -0.000000   0.000000    -0.000000   0.000000     0.000000   0.000000   )
 (  0.000000   0.000000    -0.000000   0.000000     0.000000   0.000000   )
 ( -0.000000   0.000000    -0.000000   0.000000     0.000000   0.000000   )
 ( -0.000000   0.000000     0.000000   0.000000     0.000000   0.000000   )
 (  0.000000   0.000000    -0.000000   0.000000    -0.000000   0.000000   )
 ( -0.000000   0.000000    -0.000000   0.000000    -0.000000   0.000000   )
 ( -0.000000   0.000000    -0.000000   0.000000    -0.000000   0.000000   )
 ( -0.000000   0.000000     0.000000   0.000000    -0.000000   0.000000   )
 ( -0.000000   0.000000     0.000000   0.000000    -0.000000   0.000000   )
 (  0.000000   0.000000    -0.000000   0.000000    -0.000000   0.000000   )
 ( -0.000000   0.000000    -0.000000   0.000000    -0.000000   0.000000   )
 (  0.000000   0.000000     0.000000   0.000000     0.000000   0.000000   )
 (  0.000000   0.000000    -0.000000   0.000000     0.000000   0.000000   )
 (  0.000000   0.000000     0.000000   0.000000     0.000000   0.000000   )
 ( -0.000000   0.000000     0.000000   0.000000     0.000000   0.000000   )
 (  0.000000   0.000000    -0.000000   0.000000     0.000000   0.000000   )
 (  0.000000   0.000000     0.000000   0.000000     0.000000   0.000000   )
 (  0.000000   0.000000    -0.000000   0.000000     0.000000   0.000000   )
 ( -0.000000   0.000000    -0.000000   0.000000     0.000000   0.000000   )
 (  0.000000   0.000000     0.000000   0.000000     0.000000   0.000000   )
 (  0.000000   0.000000    -0.000000   0.000000     0.000000   0.000000   )
 (  0.000000   0.000000    -0.000000   0.000000     0.000000   0.000000   )
 ( -0.000000   0.000000     0.000000   0.000000     0.000000   0.000000   )
 (  0.000000   0.000000     0.000000   0.000000    -0.000000   0.000000   )
 ( -0.000000   0.000000     0.000000   0.000000     0.000000   0.000000   )
 (  0.000591   0.000000     0.000247   0.000000    -0.000436   0.000000   )
 (  0.000000   0.000000     0.000000   0.000000     0.000000   0.000000   )
 (  0.000000   0.000000     0.000000   0.000000     0.000000   0.000000   )
 (  0.000000   0.000000    -0.000000   0.000000     0.000000   0.000000   )
 (  0.000000   0.000000     0.000000   0.000000     0.000000   0.000000   )
 ( -0.000000   0.000000     0.000000   0.000000     0.000000   0.000000   )
 (  0.000000   0.000000    -0.000000   0.000000     0.000000   0.000000   )
 (  0.020350   0.000000     0.009836   0.000000    -0.997059   0.000000   )
 (  0.000056   0.000000    -0.000102   0.000000    -0.002699   0.000000   )
 ( -0.000221   0.000000    -0.000721   0.000000    -0.038546   0.000000   )
     freq (  486) =     114.260905 [THz] =    3811.333547 [cm-1]
 ( -0.000000   0.000000    -0.000000   0.000000     0.000000   0.000000   )
 ( -0.000000   0.000000    -0.000000   0.000000    -0.000000   0.000000   )
 (  0.000000   0.000000    -0.000000   0.000000     0.000000   0.000000   )
 ( -0.000000   0.000000     0.000000   0.000000    -0.000000   0.000000   )
 ( -0.000000   0.000000    -0.000000   0.000000    -0.000000   0.000000   )
 ( -0.000000   0.000000     0.000000   0.000000    -0.000000   0.000000   )
 ( -0.000000   0.000000    -0.000000   0.000000     0.000000   0.000000   )
 ( -0.000000   0.000000     0.000000   0.000000     0.000000   0.000000   )
 ( -0.000000   0.000000     0.000000   0.000000     0.000000   0.000000   )
 (  0.000000   0.000000     0.000000   0.000000     0.000000   0.000000   )
 ( -0.000000   0.000000     0.000000   0.000000     0.000000   0.000000   )
 ( -0.000000   0.000000    -0.000000   0.000000     0.000000   0.000000   )
 (  0.000000   0.000000     0.000000   0.000000    -0.000000   0.000000   )
 ( -0.000000   0.000000    -0.000000   0.000000    -0.000000   0.000000   )
 ( -0.000000   0.000000     0.000000   0.000000    -0.000000   0.000000   )
 ( -0.000000   0.000000     0.000000   0.000000    -0.000000   0.000000   )
 ( -0.000000   0.000000    -0.000000   0.000000    -0.000000   0.000000   )
 ( -0.000000   0.000000     0.000000   0.000000    -0.000000   0.000000   )
 ( -0.000000   0.000000     0.000000   0.000000     0.000000   0.000000   )
 (  0.000000   0.000000     0.000000   0.000000     0.000000   0.000000   )
 (  0.000000   0.000000    -0.000000   0.000000     0.000000   0.000000   )
 ( -0.000000   0.000000     0.000000   0.000000     0.000000   0.000000   )
 ( -0.000000   0.000000     0.000000   0.000000     0.000000   0.000000   )
 ( -0.000000   0.000000    -0.000000   0.000000     0.000000   0.000000   )
 ( -0.000000   0.000000    -0.000000   0.000000     0.000000   0.000000   )
 (  0.000000   0.000000     0.000000   0.000000     0.000000   0.000000   )
 ( -0.000000   0.000000     0.000000   0.000000     0.000000   0.000000   )
 (  0.000000   0.000000     0.000000   0.000000     0.000000   0.000000   )
 (  0.000000   0.000000    -0.000000   0.000000     0.000000   0.000000   )
 ( -0.000000   0.000000    -0.000000   0.000000     0.000000   0.000000   )
 (  0.000000   0.000000     0.000000   0.000000     0.000000   0.000000   )
 ( -0.000000   0.000000    -0.000000   0.000000     0.000000   0.000000   )
 ( -0.000000   0.000000     0.000000   0.000000     0.000000   0.000000   )
 ( -0.000000   0.000000    -0.000000   0.000000     0.000000   0.000000   )
 (  0.000000   0.000000    -0.000000   0.000000     0.000000   0.000000   )
 ( -0.000000   0.000000     0.000000   0.000000     0.000000   0.000000   )
 ( -0.000000   0.000000     0.000000   0.000000     0.000000   0.000000   )
 ( -0.000000   0.000000     0.000000   0.000000     0.000000   0.000000   )
 (  0.000000   0.000000    -0.000000   0.000000     0.000000   0.000000   )
 ( -0.000000   0.000000    -0.000000   0.000000     0.000000   0.000000   )
 ( -0.000000   0.000000     0.000000   0.000000     0.000000   0.000000   )
 ( -0.000000   0.000000    -0.000000   0.000000     0.000000   0.000000   )
 (  0.000000   0.000000    -0.000000   0.000000    -0.000000   0.000000   )
 ( -0.000000   0.000000     0.000000   0.000000    -0.000000   0.000000   )
 (  0.000000   0.000000     0.000000   0.000000    -0.000000   0.000000   )
 (  0.000000   0.000000    -0.000000   0.000000    -0.000000   0.000000   )
 (  0.000000   0.000000     0.000000   0.000000    -0.000000   0.000000   )
 ( -0.000000   0.000000     0.000000   0.000000    -0.000000   0.000000   )
 (  0.000000   0.000000     0.000000   0.000000    -0.000000   0.000000   )
 ( -0.000000   0.000000    -0.000000   0.000000    -0.000000   0.000000   )
 (  0.000000   0.000000     0.000000   0.000000    -0.000000   0.000000   )
 ( -0.000000   0.000000    -0.000000   0.000000    -0.000000   0.000000   )
 ( -0.000000   0.000000     0.000000   0.000000    -0.000000   0.000000   )
 ( -0.000000   0.000000    -0.000000   0.000000    -0.000000   0.000000   )
 (  0.000000   0.000000     0.000000   0.000000     0.000000   0.000000   )
 ( -0.000000   0.000000    -0.000000   0.000000     0.000000   0.000000   )
 (  0.000000   0.000000    -0.000000   0.000000     0.000000   0.000000   )
 (  0.000000   0.000000     0.000000   0.000000     0.000000   0.000000   )
 (  0.000000   0.000000     0.000000   0.000000    -0.000000   0.000000   )
 ( -0.007922   0.000000    -0.002678   0.000000     0.061478   0.000000   )
 ( -0.000000   0.000000    -0.000000   0.000000     0.000000   0.000000   )
 (  0.000000   0.000000     0.000000   0.000000     0.000000   0.000000   )
 ( -0.000000   0.000000     0.000000   0.000000     0.000000   0.000000   )
 (  0.000000   0.000000     0.000000   0.000000     0.000000   0.000000   )
 (  0.000000   0.000000    -0.000000   0.000000     0.000000   0.000000   )
 (  0.000000   0.000000     0.000000   0.000000     0.000000   0.000000   )
 (  0.000000   0.000000    -0.000000   0.000000    -0.000000   0.000000   )
 ( -0.000000   0.000000    -0.000000   0.000000    -0.000000   0.000000   )
 ( -0.000000   0.000000     0.000000   0.000000    -0.000000   0.000000   )
 (  0.000000   0.000000    -0.000000   0.000000     0.000000   0.000000   )
 (  0.000000   0.000000     0.000000   0.000000     0.000000   0.000000   )
 (  0.000000   0.000000    -0.000000   0.000000     0.000000   0.000000   )
 (  0.000000   0.000000     0.000000   0.000000    -0.000000   0.000000   )
 ( -0.000000   0.000000    -0.000000   0.000000    -0.000000   0.000000   )
 ( -0.000000   0.000000    -0.000000   0.000000    -0.000000   0.000000   )
 (  0.000008   0.000000     0.000006   0.000000    -0.000037   0.000000   )
 ( -0.000004   0.000000    -0.000006   0.000000    -0.000287   0.000000   )
 ( -0.000007   0.000000    -0.000010   0.000000    -0.000112   0.000000   )
 ( -0.000000   0.000000    -0.000000   0.000000    -0.000000   0.000000   )
 (  0.000000   0.000000     0.000000   0.000000    -0.000000   0.000000   )
 (  0.000000   0.000000    -0.000000   0.000000    -0.000000   0.000000   )
 (  0.000000   0.000000    -0.000000   0.000000    -0.000000   0.000000   )
 (  0.000000   0.000000    -0.000000   0.000000    -0.000000   0.000000   )
 (  0.000000   0.000000     0.000000   0.000000    -0.000000   0.000000   )
 ( -0.000000   0.000000    -0.000000   0.000000     0.000000   0.000000   )
 (  0.000000   0.000000     0.000000   0.000000     0.000000   0.000000   )
 ( -0.000000   0.000000    -0.000000   0.000000     0.000000   0.000000   )
 (  0.000000   0.000000    -0.000000   0.000000    -0.000000   0.000000   )
 (  0.000000   0.000000     0.000000   0.000000    -0.000000   0.000000   )
 (  0.000000   0.000000    -0.000000   0.000000    -0.000000   0.000000   )
 (  0.000000   0.000000     0.000000   0.000000     0.000000   0.000000   )
 (  0.000000   0.000000    -0.000000   0.000000    -0.000000   0.000000   )
 (  0.000000   0.000000     0.000000   0.000000    -0.000000   0.000000   )
 ( -0.000000   0.000000    -0.000000   0.000000     0.000000   0.000000   )
 (  0.000000   0.000000    -0.000000   0.000000     0.000000   0.000000   )
 ( -0.000000   0.000000     0.000000   0.000000     0.000000   0.000000   )
 (  0.000000   0.000000    -0.000000   0.000000     0.000000   0.000000   )
 (  0.000000   0.000000     0.000000   0.000000     0.000000   0.000000   )
 (  0.000000   0.000000    -0.000000   0.000000     0.000000   0.000000   )
 (  0.000000   0.000000     0.000000   0.000000     0.000000   0.000000   )
 ( -0.000000   0.000000     0.000000   0.000000    -0.000000   0.000000   )
 (  0.000000   0.000000    -0.000000   0.000000     0.000000   0.000000   )
 (  0.000000   0.000000     0.000000   0.000000    -0.000000   0.000000   )
 (  0.000000   0.000000    -0.000000   0.000000    -0.000000   0.000000   )
 ( -0.000000   0.000000     0.000000   0.000000    -0.000000   0.000000   )
 (  0.000000   0.000000    -0.000000   0.000000    -0.000000   0.000000   )
 (  0.000000   0.000000    -0.000000   0.000000    -0.000000   0.000000   )
 (  0.000000   0.000000     0.000000   0.000000    -0.000000   0.000000   )
 (  0.000000   0.000000     0.000000   0.000000     0.000000   0.000000   )
 ( -0.000000   0.000000    -0.000000   0.000000     0.000000   0.000000   )
 (  0.000000   0.000000    -0.000000   0.000000     0.000000   0.000000   )
 ( -0.000000   0.000000    -0.000000   0.000000     0.000000   0.000000   )
 ( -0.000000   0.000000     0.000000   0.000000     0.000000   0.000000   )
 (  0.000000   0.000000    -0.000000   0.000000     0.000000   0.000000   )
 (  0.000000   0.000000    -0.000000   0.000000    -0.000000   0.000000   )
 (  0.000000   0.000000     0.000000   0.000000    -0.000000   0.000000   )
 (  0.000000   0.000000    -0.000000   0.000000    -0.000000   0.000000   )
 (  0.000000   0.000000    -0.000000   0.000000    -0.000000   0.000000   )
 ( -0.000000   0.000000     0.000000   0.000000    -0.000000   0.000000   )
 ( -0.000000   0.000000     0.000000   0.000000    -0.000000   0.000000   )
 ( -0.000000   0.000000    -0.000000   0.000000     0.000000   0.000000   )
 (  0.000000   0.000000    -0.000000   0.000000     0.000000   0.000000   )
 (  0.000000   0.000000     0.000000   0.000000    -0.000000   0.000000   )
 ( -0.000000   0.000000     0.000000   0.000000     0.000000   0.000000   )
 (  0.000000   0.000000    -0.000000   0.000000    -0.000000   0.000000   )
 ( -0.000000   0.000000    -0.000000   0.000000     0.000000   0.000000   )
 ( -0.000000   0.000000     0.000000   0.000000     0.000000   0.000000   )
 (  0.000000   0.000000    -0.000000   0.000000     0.000000   0.000000   )
 ( -0.000000   0.000000     0.000000   0.000000     0.000000   0.000000   )
 (  0.000000   0.000000     0.000000   0.000000     0.000000   0.000000   )
 (  0.000000   0.000000    -0.000000   0.000000     0.000000   0.000000   )
 (  0.000000   0.000000    -0.000000   0.000000     0.000000   0.000000   )
 ( -0.000000   0.000000    -0.000000   0.000000     0.000000   0.000000   )
 (  0.000000   0.000000     0.000000   0.000000     0.000000   0.000000   )
 ( -0.000000   0.000000     0.000000   0.000000     0.000000   0.000000   )
 (  0.000000   0.000000     0.000000   0.000000     0.000000   0.000000   )
 ( -0.000000   0.000000    -0.000000   0.000000     0.000000   0.000000   )
 ( -0.000000   0.000000     0.000000   0.000000     0.000000   0.000000   )
 (  0.000000   0.000000     0.000000   0.000000     0.000000   0.000000   )
 (  0.000000   0.000000    -0.000000   0.000000     0.000000   0.000000   )
 (  0.000000   0.000000     0.000000   0.000000     0.000000   0.000000   )
 (  0.000000   0.000000    -0.000000   0.000000     0.000000   0.000000   )
 (  0.000000   0.000000    -0.000000   0.000000     0.000000   0.000000   )
 (  0.000000   0.000000     0.000000   0.000000     0.000000   0.000000   )
 ( -0.000000   0.000000     0.000000   0.000000    -0.000000   0.000000   )
 (  0.000000   0.000000    -0.000000   0.000000    -0.000000   0.000000   )
 (  0.000000   0.000000    -0.000000   0.000000    -0.000000   0.000000   )
 ( -0.000000   0.000000     0.000000   0.000000    -0.000000   0.000000   )
 (  0.000000   0.000000    -0.000000   0.000000    -0.000000   0.000000   )
 ( -0.000000   0.000000    -0.000000   0.000000    -0.000000   0.000000   )
 ( -0.000000   0.000000    -0.000000   0.000000     0.000000   0.000000   )
 ( -0.000000   0.000000    -0.000000   0.000000     0.000000   0.000000   )
 (  0.125860   0.000000     0.040242   0.000000    -0.989276   0.000000   )
 (  0.000000   0.000000     0.000000   0.000000     0.000000   0.000000   )
 ( -0.000000   0.000000    -0.000000   0.000000     0.000000   0.000000   )
 ( -0.000000   0.000000     0.000000   0.000000     0.000000   0.000000   )
 ( -0.000000   0.000000    -0.000000   0.000000    -0.000000   0.000000   )
 (  0.000000   0.000000     0.000000   0.000000    -0.000000   0.000000   )
 (  0.000000   0.000000     0.000000   0.000000    -0.000000   0.000000   )
 (  0.000041   0.000000    -0.000004   0.000000     0.000384   0.000000   )
 ( -0.000280   0.000000     0.000262   0.000000     0.004403   0.000000   )
 (  0.000031   0.000000    -0.000049   0.000000     0.001682   0.000000   )
 **************************************************************************
