# Supplementary material for: Theoretical OH stretching vibrations in dravite
Source: Copernicus journal article supplement (doi:10.5194/ejm-34-239-2022), 2022-04-13
Supplement: Supplementary file 3 [file ejm-34-239-2022-supplement.zip › ejm-2021-65-supplement-version2/supplementary_files/Structure_and_eigendisplacement_files/chemically_disordered_models_simple_hexagonal_cell/dravite_Al_vacancy.cif]

#======================================================================

# CRYSTAL DATA

#----------------------------------------------------------------------

data_VESTA_phase_1


_pd_phase_name                         
_cell_length_a 16.1067867
_cell_length_b 16.1067867
_cell_length_c 7.27903080
_cell_angle_alpha                      90
_cell_angle_beta                       90
_cell_angle_gamma                      120
_symmetry_space_group_name_H-M         'P1'
_symmetry_Int_Tables_number            1

loop_
_symmetry_equiv_pos_as_xyz
   'x, y, z'

loop_
   _atom_site_label
   _atom_site_fract_x
   _atom_site_fract_y
   _atom_site_fract_z
Na      -0.000593022   0.000595151   0.276082869
Na       0.666465463   0.333534355   0.609554908
Mg       0.126716156   0.063472725   0.645406866
Mg       0.936527461   0.063472902   0.646272864
Mg       0.936527635   0.873284115   0.645404803
Mg       0.793575257   0.396531438   0.978473172
Mg       0.603408866   0.396591990   0.979400121
Mg       0.603469377   0.206425629   0.978474197
Mg       0.458651061   0.729342267   0.309249301
Al       0.269745083   0.730255610   0.317950434
Mg       0.270658376   0.541349510   0.309249390
Al       0.298837738   0.262662735   0.633770271
Al       0.737678776   0.036492002   0.632357856
Al       0.963039963   0.701330211   0.631541205
Al       0.737337753   0.701162783   0.633769677
Al       0.963508596   0.262321772   0.632357925
Al       0.298670365   0.036960756   0.631541794
Al       0.964494653   0.594851209   0.964006362
Al       0.404849151   0.370319606   0.966966710
Al       0.628145437   0.032652204   0.965053552
Al       0.405149495   0.035506168   0.964006900
Al       0.629680981   0.595151479   0.966966300
Al       0.967348435   0.371855108   0.965053567
Al       0.630630664   0.926379862   0.299557206
Al       0.070246428   0.701968419   0.298406142
Al       0.297113383   0.369194137   0.300316711
Al       0.073620776   0.369369858   0.299557223
Al       0.298032349   0.929754346   0.298406714
Al       0.630806430   0.702887259   0.300316250
Si       0.192225665   0.190593567   0.016539248
Si       0.808504604   0.002110981   0.016443349
Si       0.998497750   0.807518151   0.014851311
Si       0.809406971   0.807774799   0.016538328
Si       0.997889641   0.191495935   0.016443517
Si       0.192482463   0.001502990   0.014852152
Si       0.859235005   0.523840396   0.348901305
Si       0.475841036   0.334912515   0.349836690
Si       0.664644272   0.140008177   0.348288888
Si       0.476160256   0.140765774   0.348901884
Si       0.665088230   0.524159666   0.349836329
Si       0.859992428   0.335356255   0.348288616
Si       0.525784593   0.856352373   0.683747841
Si       0.143893821   0.669100436   0.685788400
Si       0.331356251   0.474294952   0.685321599
Si       0.143648381   0.474216007   0.683747716
Si       0.330900390   0.856107109   0.685788808
Si       0.525705586   0.668644385   0.685321342
B        0.110387393   0.220389228   0.473915935
B        0.779611329   0.889613212   0.473915100
B        0.110360960   0.889639677   0.470854458
B        0.776661524   0.553459696   0.806919912
B        0.446540953   0.223339134   0.806920618
B        0.776963331   0.223037236   0.807398903
B        0.440054376   0.885798900   0.146713065
B        0.114201832   0.559946259   0.146712945
B        0.443539338   0.556461249   0.145104910
O        0.000236824  -0.000237159   0.792761092
O        0.667142602   0.332858821   0.126494670
O        0.327110193   0.672890446   0.461694516
O        0.061845510   0.123866401   0.497905775
O        0.876134185   0.938155127   0.497904177
O        0.062294728   0.937706017   0.496538972
O        0.728797221   0.457036814   0.830801174
O        0.542963831   0.271203420   0.830802109
O        0.728689276   0.271311222   0.831319615
O        0.386029474   0.790467394   0.186704420
O        0.209533315   0.613971092   0.186704502
O        0.396128482   0.603872096   0.176918481
O        0.270579535   0.134761299   0.531882745
O        0.864640892   0.135359719   0.532086790
O        0.865239290   0.729420850   0.531881956
O        0.937679851   0.469315721   0.865352274
O        0.531647242   0.468353429   0.867201846
O        0.530684818   0.062320785   0.865352705
O        0.602825017   0.800923760   0.197952269
O        0.204531526   0.795469361   0.196519582
O        0.199077013   0.397175698   0.197952488
O        0.091239474   0.183550504   0.085540341
O        0.816450155   0.908761071   0.085539219
O        0.093592179   0.906408378   0.085699786
O        0.760651922   0.520472826   0.419689513
O        0.479527796   0.239348823   0.419690196
O        0.760238599   0.239762000   0.414214480
O        0.426817436   0.853777473   0.749952823
O        0.146224182   0.573183706   0.749951622
O        0.427189063   0.572811558   0.752028722
O        0.184825355   0.091921590   0.106042503
O        0.905609935   0.094390597   0.107511532
O        0.908078968   0.815175065   0.106041224
O        0.850414736   0.424984069   0.439182890
O        0.575284651   0.424716147   0.439559332
O        0.575016491   0.149585822   0.439183522
O        0.523033425   0.761512048   0.775690472
O        0.238444182   0.761556610   0.778938934
O        0.238488499   0.476966921   0.775690683
O        0.198975270   0.189275881   0.795178958
O        0.810065082   0.009421391   0.795067579
O        0.991475239   0.801157772   0.793463505
O        0.810724761   0.801025280   0.795178021
O        0.990579369   0.189935570   0.795067738
O        0.198843028   0.008525771   0.793464424
O        0.865394788   0.523334119   0.127578694
O        0.477009108   0.342065764   0.128541456
O        0.654921063   0.131692824   0.127392632
O        0.476666661   0.134606151   0.127579245
O        0.657935121   0.522991752   0.128541089
O        0.868307713   0.345079382   0.127392342
O        0.531446481   0.855100127   0.461728549
O        0.150662382   0.681276831   0.461379854
O        0.322728625   0.467721851   0.463613529
O        0.144900507   0.468553971   0.461728459
O        0.318724112   0.849338425   0.461380229
O        0.532278756   0.677272040   0.463613274
O        0.284506031   0.285491543   0.101878570
O        0.711984467  -0.002672009   0.100156105
O        1.001827867   0.715306223   0.099352865
O        0.714509007   0.715494582   0.101877932
O        1.002672667   0.288016137   0.100156127
O        0.284694437  -0.001827103   0.099353498
O        0.953207082   0.618397969   0.433722993
O        0.381265864   0.333062470   0.435089424
O        0.666370035   0.047236787   0.433323016
O        0.381602627   0.046793698   0.433723472
O        0.666938143   0.618734789   0.435088937
O        0.952763786   0.333630489   0.433322947
O        0.618052870   0.953000255   0.765927090
O        0.047052593   0.665163348   0.763796450
O        0.334624832   0.381345582   0.768007833
O        0.047000391   0.381947879   0.765927062
O        0.334837148   0.952948159   0.763797038
O        0.618654964   0.665375771   0.768007444
O        0.210623160   0.271120044   0.462676052
O        0.728466131   0.938797551   0.462076363
O        0.061481593   0.789205413   0.458794428
O        0.728880498   0.789377422   0.462675475
O        0.061202996   0.271534343   0.462076502
O        0.210795227   0.938518904   0.458795200
O        0.877194508   0.604637067   0.794986064
O        0.395436538   0.272270886   0.796487809
O        0.727322798   0.122767860   0.795969654
O        0.395363618   0.122806188   0.794986539
O        0.727729711   0.604564069   0.796487208
O        0.877232724   0.272677759   0.795969631
O        0.539633029   0.931988904   0.126828093
O        0.060217177   0.605513831   0.131137565
O        0.394478545   0.455818499   0.130879187
O        0.068011658   0.460367574   0.126828170
O        0.394486996   0.939783756   0.131138190
O        0.544182084   0.605522084   0.130878888
H       -0.000271405   0.000265831   0.924496190
H        0.666878803   0.333124522   0.258243767
H        0.326705384   0.673295100   0.594515386
H        0.269664519   0.135184419   0.398346459
H        0.865273409   0.134727268   0.398515744
H        0.864816061   0.730335545   0.398345662
H        0.938255865   0.469344203   0.731837532
H        0.530918602   0.469081954   0.733747918
H        0.530656273   0.061744887   0.731837964
H        0.600619481   0.799643576   0.064264498
H        0.207092126   0.792908912   0.062547342
H        0.200357174   0.399381016   0.064264709
