# Supplementary material for: Theoretical OH stretching vibrations in dravite
Source: Copernicus journal article supplement (doi:10.5194/ejm-34-239-2022), 2022-04-13
Supplement: Supplementary file 3 [file ejm-34-239-2022-supplement.zip › ejm-2021-65-supplement-version2/supplementary_files/Structure_and_eigendisplacement_files/chemically_disordered_models_simple_hexagonal_cell/dravite_Mg.cif]

#======================================================================

# CRYSTAL DATA

#----------------------------------------------------------------------

data_VESTA_phase_1


_pd_phase_name                         
_cell_length_a 16.1067867
_cell_length_b 16.1067867
_cell_length_c 7.27903080
_cell_angle_alpha                      90
_cell_angle_beta                       90
_cell_angle_gamma                      120
_symmetry_space_group_name_H-M         'P1'
_symmetry_Int_Tables_number            1

loop_
_symmetry_equiv_pos_as_xyz
   'x, y, z'

loop_
   _atom_site_label
   _atom_site_fract_x
   _atom_site_fract_y
   _atom_site_fract_z
Na       0.001476386  -0.000671735   0.275538539
Na       0.669671042   0.335911510   0.609291286
Na       0.331064683   0.667573146   0.943343447
Mg       0.126446437   0.063401960   0.647868297
Mg       0.936393954   0.063077131   0.645970635
Mg       0.937186457   0.873459026   0.642837648
Mg       0.793966142   0.397648678   0.980134499
Mg       0.603418992   0.396766542   0.978869517
Mg       0.603582964   0.207339953   0.979795258
Mg       0.459832371   0.730164834   0.312727477
Mg       0.268834473   0.729337186   0.311951156
Mg       0.269651032   0.540367739   0.313555120
Al       0.298037582   0.261221929   0.632358686
Al       0.737932347   0.036828446   0.632376158
Al       0.964963733   0.702090481   0.633832875
Al       0.738979135   0.701938939   0.631893026
Al       0.963339932   0.261988422   0.633184127
Al       0.298376972   0.036003105   0.632899772
Al       0.966008077   0.596579036   0.967962197
Al       0.404817109   0.369817314   0.965338984
Al       0.629983130   0.035173419   0.965919231
Al       0.405084418   0.035623686   0.967763144
Al       0.630101874   0.595262670   0.964789027
Al       0.964835569   0.370321133   0.965825038
Al       0.631898111   0.928650510   0.299026500
Mg       0.073372197   0.704014676   0.298456765
Al       0.295888355   0.367849566   0.298779053
Al       0.071268891   0.368362601   0.299350229
Al       0.296779533   0.927705162   0.299733405
Al       0.632055642   0.703521819   0.298598150
Si       0.192264328   0.190165458   0.016802353
Si       0.808929940   0.002071235   0.016035150
Si       0.996509950   0.806395435   0.014727259
Si       0.809077747   0.808097696   0.015491874
Si       0.998050142   0.190378987   0.016458068
Si       0.192435933   0.000878470   0.017511181
Si       0.857575803   0.523183981   0.353156531
Si       0.474726725   0.335066921   0.349350093
Si       0.664585817   0.140648602   0.349869150
Si       0.476285919   0.141650179   0.350261809
Si       0.662861713   0.523354836   0.349461588
Si       0.859010447   0.334785141   0.350062357
Si       0.526127114   0.857343479   0.683474939
Si       0.143957708   0.667644665   0.686876589
Si       0.331506737   0.473580040   0.682560995
Si       0.142680042   0.473709181   0.685199523
Si       0.331435501   0.857032602   0.686057145
Si       0.525795142   0.668249840   0.682223067
B        0.109481245   0.220038326   0.474144347
B        0.779683997   0.890158057   0.472688720
B        0.110061236   0.890886368   0.480420081
B        0.777258256   0.554046357   0.808340880
B        0.446814306   0.223307707   0.806305197
B        0.776600914   0.223270434   0.807066938
B        0.444473478   0.888008402   0.141312768
B        0.113793798   0.555497500   0.132132113
B        0.443368725   0.556627584   0.139796181
O       -0.000781501   0.000402332   0.794038392
O        0.666281740   0.333332981   0.126941988
O        0.335382161   0.666588328   0.459916128
O        0.061522253   0.123760128   0.498698565
O        0.876041571   0.938430195   0.496364110
O        0.063427656   0.941833615   0.497250711
O        0.728187431   0.457305948   0.832151575
O        0.543305694   0.271901064   0.830081809
O        0.728541174   0.271561053   0.831581432
O        0.396051378   0.791675039   0.165102492
O        0.210437422   0.602952558   0.162076499
O        0.395278919   0.604791486   0.164126342
O        0.270577117   0.135663836   0.533291940
O        0.864469182   0.135107488   0.532347228
O        0.862995738   0.730129560   0.532220071
O        0.934460584   0.465763142   0.863721088
O        0.531060478   0.468172731   0.864795559
O        0.531921316   0.063519234   0.866127009
O        0.603844389   0.802052554   0.198497177
O        0.209140376   0.808004561   0.193484639
O        0.198158679   0.395670344   0.199425501
O        0.093136761   0.186216616   0.086364161
O        0.811083368   0.906281145   0.085675317
O        0.093168696   0.905620619   0.084702062
O        0.753453191   0.511571184   0.417438497
O        0.482250610   0.241960403   0.420097869
O        0.759946668   0.239139057   0.419771698
O        0.427008894   0.852559848   0.754671052
O        0.149782822   0.573024415   0.761317457
O        0.426179151   0.573432665   0.751971687
O        0.183421431   0.091416551   0.107329362
O        0.908082232   0.091334059   0.106692882
O        0.908950143   0.820424731   0.106313337
O        0.849055022   0.423389252   0.441939849
O        0.570068138   0.427584609   0.441729718
O        0.574726057   0.149391403   0.440882413
O        0.519309391   0.759329919   0.773911805
O        0.242429193   0.759143631   0.780945585
O        0.240314405   0.478973277   0.774911798
O        0.198815925   0.189663272   0.795489952
O        0.810215057   0.009896321   0.794800116
O        0.988126246   0.802366359   0.793999735
O        0.809381089   0.801946251   0.794172983
O        0.990333277   0.189187859   0.795128582
O        0.199623985   0.010159727   0.796256981
O        0.865695943   0.521282030   0.131798720
O        0.476559219   0.342088756   0.127914961
O        0.656813225   0.134439795   0.128650122
O        0.477721128   0.136269346   0.128741192
O        0.655601804   0.522347159   0.128089057
O        0.865053831   0.341541621   0.128809573
O        0.532866737   0.856245290   0.462192063
O        0.150752856   0.672853285   0.468989115
O        0.324291219   0.467471384   0.461264755
O        0.144044197   0.466945144   0.463813593
O        0.325953135   0.857455882   0.465136399
O        0.532418510   0.675904350   0.460961749
O        0.285053396   0.285429762   0.100583422
O        0.714879032   0.001129330   0.101477246
O        0.992901294   0.711452615   0.092397357
O        0.714460562   0.714732960   0.100342982
O        0.999327921   0.284324548   0.102091085
O        0.286748319   0.001796845   0.102173609
O        0.944623968   0.616296892   0.445684034
O        0.378934432   0.331138115   0.432739497
O        0.666424186   0.047756494   0.434571829
O        0.381771914   0.049257962   0.435462484
O        0.667829812   0.619737896   0.433056294
O        0.951743314   0.332661270   0.434921633
O        0.618827385   0.952559905   0.767790098
O        0.047871069   0.665280601   0.766539796
O        0.334531452   0.381140481   0.766632273
O        0.047099683   0.380544682   0.767717448
O        0.334479640   0.952634802   0.770482001
O        0.618242283   0.665611916   0.766671951
O        0.209736253   0.271144725   0.462885684
O        0.728844448   0.939744573   0.461919282
O        0.061369701   0.792814850   0.479480898
O        0.728206587   0.789990656   0.461682590
O        0.060157812   0.270873131   0.462457381
O        0.211359643   0.940710695   0.463804616
O        0.876564722   0.604687195   0.798394492
O        0.395474420   0.272316882   0.795262531
O        0.726948851   0.122875470   0.795441793
O        0.396053729   0.123168637   0.795506165
O        0.727109771   0.604613197   0.795793326
O        0.876686266   0.271686388   0.795970172
O        0.544988361   0.937933692   0.128796705
O        0.063749179   0.602764679   0.109762206
O        0.394160637   0.456137053   0.128592449
O        0.062716460   0.453977810   0.128319978
O        0.398031557   0.941513815   0.131658683
O        0.543748528   0.606023029   0.128190523
H       -0.003374730  -0.005201250   0.925331605
H        0.669468613   0.337670489   0.258391408
H        0.328612258   0.668410299   0.590489961
H        0.268617465   0.134016028   0.399834268
H        0.865086104   0.135087874   0.398846033
H        0.863815722   0.728493073   0.398887492
H        0.933369179   0.465975449   0.730229971
H        0.531573584   0.467373156   0.731221026
H        0.531754502   0.064209401   0.732621069
H        0.602522248   0.801420933   0.064968012
H        0.210700475   0.807305384   0.060275027
H        0.198762476   0.397893857   0.065917022
