# Supplementary material for: Theoretical OH stretching vibrations in dravite
Source: Copernicus journal article supplement (doi:10.5194/ejm-34-239-2022), 2022-04-13
Supplement: Supplementary file 3 [file ejm-34-239-2022-supplement.zip › ejm-2021-65-supplement-version2/supplementary_files/Structure_and_eigendisplacement_files/chemically_disordered_models_simple_hexagonal_cell/dravite_Mg.txt]

     freq (  483) =     109.404206 [THz] =    3649.331509 [cm-1]
 ( -0.000000   0.000000    -0.000000   0.000000     0.000000   0.000000   )
 (  0.000000   0.000000     0.000000   0.000000     0.000000   0.000000   )
 ( -0.000000   0.000000    -0.000000   0.000000    -0.000000   0.000000   )
 (  0.000000   0.000000    -0.000000   0.000000     0.000000   0.000000   )
 ( -0.000000   0.000000    -0.000000   0.000000     0.000000   0.000000   )
 ( -0.000000   0.000000    -0.000000   0.000000     0.000000   0.000000   )
 ( -0.000000   0.000000     0.000000   0.000000    -0.000000   0.000000   )
 (  0.000000   0.000000     0.000000   0.000000    -0.000000   0.000000   )
 (  0.000000   0.000000    -0.000000   0.000000    -0.000000   0.000000   )
 (  0.000000   0.000000     0.000000   0.000000     0.000000   0.000000   )
 (  0.000000   0.000000     0.000000   0.000000     0.000000   0.000000   )
 ( -0.000000   0.000000     0.000000   0.000000     0.000000   0.000000   )
 (  0.000000   0.000000     0.000000   0.000000     0.000000   0.000000   )
 ( -0.000000   0.000000    -0.000000   0.000000     0.000000   0.000000   )
 (  0.000000   0.000000    -0.000000   0.000000     0.000000   0.000000   )
 ( -0.000000   0.000000    -0.000000   0.000000     0.000000   0.000000   )
 ( -0.000000   0.000000     0.000000   0.000000     0.000000   0.000000   )
 (  0.000000   0.000000    -0.000000   0.000000     0.000000   0.000000   )
 ( -0.000000   0.000000    -0.000000   0.000000    -0.000000   0.000000   )
 ( -0.000000   0.000000     0.000000   0.000000    -0.000000   0.000000   )
 ( -0.000000   0.000000    -0.000000   0.000000     0.000000   0.000000   )
 (  0.000000   0.000000    -0.000000   0.000000     0.000000   0.000000   )
 (  0.000000   0.000000    -0.000000   0.000000    -0.000000   0.000000   )
 (  0.000000   0.000000     0.000000   0.000000    -0.000000   0.000000   )
 ( -0.000000   0.000000    -0.000000   0.000000    -0.000000   0.000000   )
 (  0.000000   0.000000     0.000000   0.000000     0.000000   0.000000   )
 (  0.000000   0.000000     0.000000   0.000000     0.000000   0.000000   )
 ( -0.000000   0.000000     0.000000   0.000000     0.000000   0.000000   )
 (  0.000000   0.000000    -0.000000   0.000000    -0.000000   0.000000   )
 ( -0.000000   0.000000     0.000000   0.000000     0.000000   0.000000   )
 (  0.000000   0.000000    -0.000000   0.000000    -0.000000   0.000000   )
 ( -0.000000   0.000000    -0.000000   0.000000    -0.000000   0.000000   )
 (  0.000000   0.000000    -0.000000   0.000000    -0.000000   0.000000   )
 ( -0.000000   0.000000    -0.000000   0.000000    -0.000000   0.000000   )
 ( -0.000000   0.000000    -0.000000   0.000000    -0.000000   0.000000   )
 (  0.000000   0.000000    -0.000000   0.000000    -0.000000   0.000000   )
 ( -0.000000   0.000000     0.000000   0.000000     0.000000   0.000000   )
 (  0.000000   0.000000     0.000000   0.000000     0.000000   0.000000   )
 ( -0.000000   0.000000    -0.000000   0.000000    -0.000000   0.000000   )
 (  0.000000   0.000000    -0.000000   0.000000    -0.000000   0.000000   )
 (  0.000000   0.000000     0.000000   0.000000     0.000000   0.000000   )
 ( -0.000000   0.000000     0.000000   0.000000     0.000000   0.000000   )
 ( -0.000000   0.000000    -0.000000   0.000000    -0.000000   0.000000   )
 (  0.000000   0.000000    -0.000000   0.000000     0.000000   0.000000   )
 ( -0.000000   0.000000    -0.000000   0.000000     0.000000   0.000000   )
 (  0.000000   0.000000    -0.000000   0.000000     0.000000   0.000000   )
 ( -0.000000   0.000000    -0.000000   0.000000     0.000000   0.000000   )
 ( -0.000000   0.000000    -0.000000   0.000000     0.000000   0.000000   )
 ( -0.000000   0.000000    -0.000000   0.000000     0.000000   0.000000   )
 ( -0.000000   0.000000    -0.000000   0.000000    -0.000000   0.000000   )
 (  0.000000   0.000000    -0.000000   0.000000    -0.000000   0.000000   )
 (  0.000000   0.000000     0.000000   0.000000    -0.000000   0.000000   )
 ( -0.000000   0.000000     0.000000   0.000000    -0.000000   0.000000   )
 (  0.000000   0.000000     0.000000   0.000000    -0.000000   0.000000   )
 (  0.000000   0.000000    -0.000000   0.000000    -0.000000   0.000000   )
 ( -0.000000   0.000000     0.000000   0.000000    -0.000000   0.000000   )
 (  0.000000   0.000000     0.000000   0.000000    -0.000000   0.000000   )
 (  0.000000   0.000000     0.000000   0.000000     0.000000   0.000000   )
 ( -0.000000   0.000000    -0.000000   0.000000     0.000000   0.000000   )
 ( -0.000004   0.000000     0.000028   0.000000    -0.000015   0.000000   )
 (  0.000000   0.000000     0.000000   0.000000    -0.000000   0.000000   )
 (  0.000000   0.000000     0.000000   0.000000     0.000000   0.000000   )
 ( -0.000000   0.000000     0.000000   0.000000     0.000000   0.000000   )
 ( -0.000000   0.000000    -0.000000   0.000000     0.000000   0.000000   )
 (  0.000000   0.000000    -0.000000   0.000000     0.000000   0.000000   )
 ( -0.000000   0.000000    -0.000000   0.000000     0.000000   0.000000   )
 ( -0.000000   0.000000     0.000000   0.000000    -0.000000   0.000000   )
 (  0.000000   0.000000    -0.000000   0.000000     0.000000   0.000000   )
 ( -0.000000   0.000000    -0.000000   0.000000     0.000000   0.000000   )
 ( -0.000000   0.000000     0.000000   0.000000    -0.000000   0.000000   )
 (  0.000000   0.000000     0.000000   0.000000    -0.000000   0.000000   )
 ( -0.000000   0.000000     0.000000   0.000000     0.000000   0.000000   )
 ( -0.000000   0.000000     0.000000   0.000000     0.000000   0.000000   )
 (  0.000000   0.000000     0.000000   0.000000     0.000000   0.000000   )
 ( -0.000000   0.000000     0.000000   0.000000     0.000000   0.000000   )
 ( -0.000024   0.000000    -0.000014   0.000000    -0.001797   0.000000   )
 (  0.000004   0.000000    -0.000002   0.000000    -0.000252   0.000000   )
 (  0.000605   0.000000    -0.001828   0.000000     0.062242   0.000000   )
 (  0.000000   0.000000     0.000000   0.000000     0.000000   0.000000   )
 (  0.000000   0.000000     0.000000   0.000000    -0.000000   0.000000   )
 ( -0.000000   0.000000     0.000000   0.000000    -0.000000   0.000000   )
 ( -0.000000   0.000000    -0.000000   0.000000    -0.000000   0.000000   )
 ( -0.000000   0.000000     0.000000   0.000000    -0.000000   0.000000   )
 (  0.000000   0.000000     0.000000   0.000000    -0.000000   0.000000   )
 (  0.000000   0.000000     0.000000   0.000000     0.000000   0.000000   )
 ( -0.000000   0.000000     0.000000   0.000000    -0.000000   0.000000   )
 (  0.000000   0.000000     0.000000   0.000000    -0.000000   0.000000   )
 ( -0.000000   0.000000     0.000000   0.000000     0.000000   0.000000   )
 (  0.000000   0.000000     0.000000   0.000000     0.000000   0.000000   )
 (  0.000000   0.000000     0.000000   0.000000    -0.000000   0.000000   )
 (  0.000000   0.000000    -0.000000   0.000000    -0.000000   0.000000   )
 ( -0.000000   0.000000    -0.000000   0.000000    -0.000000   0.000000   )
 ( -0.000000   0.000000     0.000000   0.000000    -0.000000   0.000000   )
 (  0.000000   0.000000     0.000000   0.000000     0.000000   0.000000   )
 ( -0.000000   0.000000     0.000000   0.000000     0.000000   0.000000   )
 (  0.000000   0.000000     0.000000   0.000000    -0.000000   0.000000   )
 (  0.000000   0.000000    -0.000000   0.000000     0.000000   0.000000   )
 (  0.000000   0.000000     0.000000   0.000000     0.000000   0.000000   )
 ( -0.000000   0.000000     0.000000   0.000000     0.000000   0.000000   )
 (  0.000000   0.000000     0.000000   0.000000     0.000000   0.000000   )
 ( -0.000000   0.000000    -0.000000   0.000000     0.000000   0.000000   )
 ( -0.000000   0.000000     0.000000   0.000000     0.000000   0.000000   )
 (  0.000000   0.000000    -0.000000   0.000000     0.000000   0.000000   )
 ( -0.000000   0.000000    -0.000000   0.000000     0.000000   0.000000   )
 (  0.000000   0.000000     0.000000   0.000000     0.000000   0.000000   )
 ( -0.000000   0.000000    -0.000000   0.000000     0.000000   0.000000   )
 ( -0.000000   0.000000    -0.000000   0.000000     0.000000   0.000000   )
 (  0.000000   0.000000    -0.000000   0.000000     0.000000   0.000000   )
 (  0.000000   0.000000     0.000000   0.000000     0.000000   0.000000   )
 ( -0.000000   0.000000     0.000000   0.000000    -0.000000   0.000000   )
 (  0.000000   0.000000    -0.000000   0.000000    -0.000000   0.000000   )
 ( -0.000000   0.000000    -0.000000   0.000000    -0.000000   0.000000   )
 ( -0.000000   0.000000     0.000000   0.000000    -0.000000   0.000000   )
 (  0.000000   0.000000     0.000000   0.000000    -0.000000   0.000000   )
 ( -0.000000   0.000000     0.000000   0.000000     0.000000   0.000000   )
 (  0.000000   0.000000     0.000000   0.000000    -0.000000   0.000000   )
 ( -0.000000   0.000000     0.000000   0.000000     0.000000   0.000000   )
 (  0.000000   0.000000    -0.000000   0.000000    -0.000000   0.000000   )
 (  0.000000   0.000000     0.000000   0.000000     0.000000   0.000000   )
 ( -0.000000   0.000000     0.000000   0.000000    -0.000000   0.000000   )
 ( -0.000000   0.000000    -0.000000   0.000000    -0.000000   0.000000   )
 ( -0.000000   0.000000    -0.000000   0.000000    -0.000000   0.000000   )
 (  0.000000   0.000000     0.000000   0.000000    -0.000000   0.000000   )
 ( -0.000000   0.000000     0.000000   0.000000    -0.000000   0.000000   )
 (  0.000000   0.000000    -0.000000   0.000000    -0.000000   0.000000   )
 (  0.000000   0.000000    -0.000000   0.000000    -0.000000   0.000000   )
 (  0.000000   0.000000     0.000000   0.000000     0.000000   0.000000   )
 ( -0.000000   0.000000     0.000000   0.000000     0.000000   0.000000   )
 (  0.000000   0.000000    -0.000000   0.000000    -0.000000   0.000000   )
 ( -0.000000   0.000000    -0.000000   0.000000    -0.000000   0.000000   )
 ( -0.000000   0.000000     0.000000   0.000000     0.000000   0.000000   )
 (  0.000000   0.000000     0.000000   0.000000     0.000000   0.000000   )
 ( -0.000000   0.000000     0.000000   0.000000    -0.000000   0.000000   )
 (  0.000000   0.000000     0.000000   0.000000     0.000000   0.000000   )
 ( -0.000000   0.000000     0.000000   0.000000     0.000000   0.000000   )
 (  0.000000   0.000000     0.000000   0.000000     0.000000   0.000000   )
 (  0.000000   0.000000     0.000000   0.000000    -0.000000   0.000000   )
 ( -0.000000   0.000000     0.000000   0.000000     0.000000   0.000000   )
 ( -0.000000   0.000000    -0.000000   0.000000     0.000000   0.000000   )
 (  0.000000   0.000000    -0.000000   0.000000     0.000000   0.000000   )
 ( -0.000000   0.000000    -0.000000   0.000000     0.000000   0.000000   )
 ( -0.000000   0.000000    -0.000000   0.000000     0.000000   0.000000   )
 (  0.000000   0.000000    -0.000000   0.000000     0.000000   0.000000   )
 ( -0.000000   0.000000    -0.000000   0.000000     0.000000   0.000000   )
 ( -0.000000   0.000000     0.000000   0.000000    -0.000000   0.000000   )
 (  0.000000   0.000000    -0.000000   0.000000     0.000000   0.000000   )
 ( -0.000000   0.000000    -0.000000   0.000000     0.000000   0.000000   )
 (  0.000000   0.000000    -0.000000   0.000000     0.000000   0.000000   )
 ( -0.000000   0.000000     0.000000   0.000000    -0.000000   0.000000   )
 ( -0.000000   0.000000    -0.000000   0.000000     0.000000   0.000000   )
 ( -0.000000   0.000000    -0.000000   0.000000    -0.000000   0.000000   )
 (  0.000000   0.000000     0.000000   0.000000     0.000000   0.000000   )
 (  0.000119   0.000000    -0.000703   0.000000    -0.000526   0.000000   )
 (  0.000000   0.000000    -0.000000   0.000000     0.000000   0.000000   )
 ( -0.000000   0.000000    -0.000000   0.000000     0.000000   0.000000   )
 ( -0.000000   0.000000    -0.000000   0.000000     0.000000   0.000000   )
 (  0.000000   0.000000    -0.000000   0.000000     0.000000   0.000000   )
 ( -0.000000   0.000000    -0.000000   0.000000     0.000000   0.000000   )
 ( -0.000000   0.000000    -0.000000   0.000000     0.000000   0.000000   )
 (  0.000211   0.000000     0.000121   0.000000     0.028658   0.000000   )
 ( -0.000064   0.000000     0.000034   0.000000     0.003904   0.000000   )
 ( -0.008965   0.000000     0.021723   0.000000    -0.997361   0.000000   )
     freq (  484) =     109.525986 [THz] =    3653.393635 [cm-1]
 ( -0.000000   0.000000    -0.000000   0.000000    -0.000000   0.000000   )
 (  0.000000   0.000000     0.000000   0.000000    -0.000000   0.000000   )
 ( -0.000000   0.000000    -0.000000   0.000000     0.000000   0.000000   )
 ( -0.000000   0.000000    -0.000000   0.000000    -0.000000   0.000000   )
 (  0.000000   0.000000    -0.000000   0.000000    -0.000000   0.000000   )
 ( -0.000000   0.000000     0.000000   0.000000    -0.000000   0.000000   )
 ( -0.000000   0.000000    -0.000000   0.000000     0.000000   0.000000   )
 (  0.000000   0.000000     0.000000   0.000000     0.000000   0.000000   )
 (  0.000000   0.000000    -0.000000   0.000000     0.000000   0.000000   )
 (  0.000000   0.000000     0.000000   0.000000    -0.000000   0.000000   )
 (  0.000000   0.000000     0.000000   0.000000    -0.000000   0.000000   )
 (  0.000000   0.000000    -0.000000   0.000000    -0.000000   0.000000   )
 (  0.000000   0.000000    -0.000000   0.000000    -0.000000   0.000000   )
 (  0.000000   0.000000     0.000000   0.000000    -0.000000   0.000000   )
 ( -0.000000   0.000000     0.000000   0.000000    -0.000000   0.000000   )
 (  0.000000   0.000000     0.000000   0.000000    -0.000000   0.000000   )
 ( -0.000000   0.000000    -0.000000   0.000000    -0.000000   0.000000   )
 ( -0.000000   0.000000     0.000000   0.000000    -0.000000   0.000000   )
 ( -0.000000   0.000000     0.000000   0.000000     0.000000   0.000000   )
 ( -0.000000   0.000000    -0.000000   0.000000     0.000000   0.000000   )
 (  0.000000   0.000000     0.000000   0.000000     0.000000   0.000000   )
 ( -0.000000   0.000000    -0.000000   0.000000     0.000000   0.000000   )
 (  0.000000   0.000000    -0.000000   0.000000     0.000000   0.000000   )
 ( -0.000000   0.000000    -0.000000   0.000000     0.000000   0.000000   )
 (  0.000000   0.000000    -0.000000   0.000000    -0.000000   0.000000   )
 ( -0.000000   0.000000     0.000000   0.000000     0.000000   0.000000   )
 ( -0.000000   0.000000    -0.000000   0.000000    -0.000000   0.000000   )
 (  0.000000   0.000000    -0.000000   0.000000    -0.000000   0.000000   )
 (  0.000000   0.000000     0.000000   0.000000    -0.000000   0.000000   )
 ( -0.000000   0.000000     0.000000   0.000000    -0.000000   0.000000   )
 ( -0.000000   0.000000    -0.000000   0.000000     0.000000   0.000000   )
 ( -0.000000   0.000000    -0.000000   0.000000     0.000000   0.000000   )
 ( -0.000000   0.000000     0.000000   0.000000     0.000000   0.000000   )
 ( -0.000000   0.000000    -0.000000   0.000000     0.000000   0.000000   )
 ( -0.000000   0.000000    -0.000000   0.000000     0.000000   0.000000   )
 ( -0.000000   0.000000    -0.000000   0.000000     0.000000   0.000000   )
 ( -0.000000   0.000000     0.000000   0.000000     0.000000   0.000000   )
 (  0.000000   0.000000     0.000000   0.000000    -0.000000   0.000000   )
 (  0.000000   0.000000    -0.000000   0.000000    -0.000000   0.000000   )
 (  0.000000   0.000000     0.000000   0.000000    -0.000000   0.000000   )
 ( -0.000000   0.000000     0.000000   0.000000    -0.000000   0.000000   )
 ( -0.000000   0.000000    -0.000000   0.000000     0.000000   0.000000   )
 ( -0.000000   0.000000     0.000000   0.000000    -0.000000   0.000000   )
 ( -0.000000   0.000000    -0.000000   0.000000    -0.000000   0.000000   )
 ( -0.000000   0.000000    -0.000000   0.000000    -0.000000   0.000000   )
 ( -0.000000   0.000000    -0.000000   0.000000    -0.000000   0.000000   )
 ( -0.000000   0.000000     0.000000   0.000000    -0.000000   0.000000   )
 (  0.000000   0.000000    -0.000000   0.000000    -0.000000   0.000000   )
 ( -0.000000   0.000000    -0.000000   0.000000    -0.000000   0.000000   )
 ( -0.000000   0.000000    -0.000000   0.000000    -0.000000   0.000000   )
 ( -0.000000   0.000000     0.000000   0.000000     0.000000   0.000000   )
 (  0.000000   0.000000    -0.000000   0.000000     0.000000   0.000000   )
 (  0.000000   0.000000     0.000000   0.000000     0.000000   0.000000   )
 (  0.000000   0.000000     0.000000   0.000000     0.000000   0.000000   )
 (  0.000000   0.000000     0.000000   0.000000     0.000000   0.000000   )
 ( -0.000000   0.000000    -0.000000   0.000000     0.000000   0.000000   )
 (  0.000000   0.000000     0.000000   0.000000     0.000000   0.000000   )
 (  0.000000   0.000000     0.000000   0.000000    -0.000000   0.000000   )
 ( -0.000000   0.000000    -0.000000   0.000000    -0.000000   0.000000   )
 (  0.000025   0.000000     0.000012   0.000000     0.000050   0.000000   )
 (  0.000000   0.000000     0.000000   0.000000    -0.000000   0.000000   )
 (  0.000000   0.000000     0.000000   0.000000     0.000000   0.000000   )
 (  0.000000   0.000000    -0.000000   0.000000    -0.000000   0.000000   )
 ( -0.000000   0.000000     0.000000   0.000000    -0.000000   0.000000   )
 ( -0.000000   0.000000    -0.000000   0.000000    -0.000000   0.000000   )
 (  0.000000   0.000000    -0.000000   0.000000    -0.000000   0.000000   )
 ( -0.000000   0.000000    -0.000000   0.000000    -0.000000   0.000000   )
 (  0.000000   0.000000     0.000000   0.000000     0.000000   0.000000   )
 ( -0.000000   0.000000    -0.000000   0.000000    -0.000000   0.000000   )
 (  0.000000   0.000000     0.000000   0.000000     0.000000   0.000000   )
 ( -0.000000   0.000000     0.000000   0.000000     0.000000   0.000000   )
 (  0.000000   0.000000    -0.000000   0.000000     0.000000   0.000000   )
 (  0.000000   0.000000     0.000000   0.000000    -0.000000   0.000000   )
 ( -0.000000   0.000000     0.000000   0.000000    -0.000000   0.000000   )
 (  0.000000   0.000000    -0.000000   0.000000    -0.000000   0.000000   )
 ( -0.000887   0.000000    -0.000473   0.000000    -0.062228   0.000000   )
 ( -0.000009   0.000000     0.000003   0.000000     0.000339   0.000000   )
 ( -0.000018   0.000000     0.000054   0.000000    -0.001778   0.000000   )
 (  0.000000   0.000000     0.000000   0.000000    -0.000000   0.000000   )
 (  0.000000   0.000000     0.000000   0.000000    -0.000000   0.000000   )
 (  0.000000   0.000000     0.000000   0.000000     0.000000   0.000000   )
 (  0.000000   0.000000    -0.000000   0.000000     0.000000   0.000000   )
 ( -0.000000   0.000000    -0.000000   0.000000     0.000000   0.000000   )
 ( -0.000000   0.000000     0.000000   0.000000     0.000000   0.000000   )
 (  0.000000   0.000000    -0.000000   0.000000     0.000000   0.000000   )
 (  0.000000   0.000000     0.000000   0.000000     0.000000   0.000000   )
 (  0.000000   0.000000     0.000000   0.000000     0.000000   0.000000   )
 (  0.000000   0.000000     0.000000   0.000000     0.000000   0.000000   )
 (  0.000000   0.000000     0.000000   0.000000    -0.000000   0.000000   )
 (  0.000000   0.000000     0.000000   0.000000    -0.000000   0.000000   )
 (  0.000000   0.000000     0.000000   0.000000     0.000000   0.000000   )
 ( -0.000000   0.000000    -0.000000   0.000000     0.000000   0.000000   )
 ( -0.000000   0.000000     0.000000   0.000000     0.000000   0.000000   )
 (  0.000000   0.000000     0.000000   0.000000     0.000000   0.000000   )
 (  0.000000   0.000000     0.000000   0.000000    -0.000000   0.000000   )
 (  0.000000   0.000000     0.000000   0.000000     0.000000   0.000000   )
 (  0.000000   0.000000     0.000000   0.000000    -0.000000   0.000000   )
 ( -0.000000   0.000000    -0.000000   0.000000    -0.000000   0.000000   )
 (  0.000000   0.000000    -0.000000   0.000000    -0.000000   0.000000   )
 ( -0.000000   0.000000    -0.000000   0.000000    -0.000000   0.000000   )
 (  0.000000   0.000000     0.000000   0.000000    -0.000000   0.000000   )
 (  0.000000   0.000000     0.000000   0.000000    -0.000000   0.000000   )
 (  0.000000   0.000000    -0.000000   0.000000    -0.000000   0.000000   )
 ( -0.000000   0.000000    -0.000000   0.000000    -0.000000   0.000000   )
 ( -0.000000   0.000000     0.000000   0.000000    -0.000000   0.000000   )
 ( -0.000000   0.000000    -0.000000   0.000000    -0.000000   0.000000   )
 (  0.000000   0.000000    -0.000000   0.000000    -0.000000   0.000000   )
 ( -0.000000   0.000000     0.000000   0.000000    -0.000000   0.000000   )
 ( -0.000000   0.000000    -0.000000   0.000000     0.000000   0.000000   )
 (  0.000000   0.000000     0.000000   0.000000     0.000000   0.000000   )
 (  0.000000   0.000000     0.000000   0.000000     0.000000   0.000000   )
 (  0.000000   0.000000     0.000000   0.000000     0.000000   0.000000   )
 (  0.000000   0.000000    -0.000000   0.000000     0.000000   0.000000   )
 ( -0.000000   0.000000    -0.000000   0.000000     0.000000   0.000000   )
 (  0.000000   0.000000    -0.000000   0.000000    -0.000000   0.000000   )
 (  0.000000   0.000000     0.000000   0.000000    -0.000000   0.000000   )
 (  0.000000   0.000000    -0.000000   0.000000     0.000000   0.000000   )
 (  0.000000   0.000000    -0.000000   0.000000    -0.000000   0.000000   )
 ( -0.000000   0.000000     0.000000   0.000000    -0.000000   0.000000   )
 (  0.000000   0.000000    -0.000000   0.000000    -0.000000   0.000000   )
 (  0.000000   0.000000     0.000000   0.000000     0.000000   0.000000   )
 ( -0.000000   0.000000     0.000000   0.000000     0.000000   0.000000   )
 ( -0.000000   0.000000     0.000000   0.000000     0.000000   0.000000   )
 ( -0.000000   0.000000    -0.000000   0.000000     0.000000   0.000000   )
 ( -0.000000   0.000000    -0.000000   0.000000     0.000000   0.000000   )
 (  0.000000   0.000000     0.000000   0.000000     0.000000   0.000000   )
 (  0.000000   0.000000    -0.000000   0.000000     0.000000   0.000000   )
 (  0.000000   0.000000     0.000000   0.000000    -0.000000   0.000000   )
 ( -0.000000   0.000000     0.000000   0.000000    -0.000000   0.000000   )
 (  0.000000   0.000000     0.000000   0.000000    -0.000000   0.000000   )
 (  0.000000   0.000000    -0.000000   0.000000    -0.000000   0.000000   )
 ( -0.000000   0.000000     0.000000   0.000000     0.000000   0.000000   )
 (  0.000000   0.000000     0.000000   0.000000     0.000000   0.000000   )
 (  0.000000   0.000000     0.000000   0.000000     0.000000   0.000000   )
 (  0.000000   0.000000    -0.000000   0.000000    -0.000000   0.000000   )
 (  0.000000   0.000000    -0.000000   0.000000     0.000000   0.000000   )
 (  0.000000   0.000000     0.000000   0.000000     0.000000   0.000000   )
 (  0.000000   0.000000    -0.000000   0.000000    -0.000000   0.000000   )
 ( -0.000000   0.000000    -0.000000   0.000000    -0.000000   0.000000   )
 ( -0.000000   0.000000     0.000000   0.000000    -0.000000   0.000000   )
 ( -0.000000   0.000000    -0.000000   0.000000    -0.000000   0.000000   )
 (  0.000000   0.000000    -0.000000   0.000000    -0.000000   0.000000   )
 ( -0.000000   0.000000     0.000000   0.000000    -0.000000   0.000000   )
 ( -0.000000   0.000000    -0.000000   0.000000    -0.000000   0.000000   )
 ( -0.000000   0.000000     0.000000   0.000000    -0.000000   0.000000   )
 (  0.000000   0.000000     0.000000   0.000000     0.000000   0.000000   )
 ( -0.000000   0.000000    -0.000000   0.000000    -0.000000   0.000000   )
 (  0.000000   0.000000     0.000000   0.000000     0.000000   0.000000   )
 ( -0.000000   0.000000     0.000000   0.000000    -0.000000   0.000000   )
 (  0.000000   0.000000    -0.000000   0.000000    -0.000000   0.000000   )
 ( -0.000000   0.000000    -0.000000   0.000000     0.000000   0.000000   )
 (  0.000000   0.000000     0.000000   0.000000    -0.000000   0.000000   )
 ( -0.000627   0.000000    -0.000271   0.000000     0.000086   0.000000   )
 ( -0.000000   0.000000    -0.000000   0.000000    -0.000000   0.000000   )
 ( -0.000000   0.000000    -0.000000   0.000000    -0.000000   0.000000   )
 ( -0.000000   0.000000     0.000000   0.000000    -0.000000   0.000000   )
 ( -0.000000   0.000000    -0.000000   0.000000    -0.000000   0.000000   )
 (  0.000000   0.000000    -0.000000   0.000000    -0.000000   0.000000   )
 ( -0.000000   0.000000     0.000000   0.000000    -0.000000   0.000000   )
 (  0.008042   0.000000     0.003872   0.000000     0.997594   0.000000   )
 (  0.000126   0.000000    -0.000005   0.000000    -0.005263   0.000000   )
 (  0.000274   0.000000    -0.000629   0.000000     0.028646   0.000000   )
     freq (  485) =     110.230467 [THz] =    3676.892607 [cm-1]
 ( -0.000000   0.000000     0.000000   0.000000     0.000000   0.000000   )
 (  0.000000   0.000000     0.000000   0.000000     0.000000   0.000000   )
 ( -0.000000   0.000000     0.000000   0.000000    -0.000000   0.000000   )
 ( -0.000000   0.000000     0.000000   0.000000     0.000000   0.000000   )
 ( -0.000000   0.000000     0.000000   0.000000     0.000000   0.000000   )
 ( -0.000000   0.000000    -0.000000   0.000000     0.000000   0.000000   )
 (  0.000000   0.000000     0.000000   0.000000    -0.000000   0.000000   )
 (  0.000000   0.000000     0.000000   0.000000    -0.000000   0.000000   )
 (  0.000000   0.000000     0.000000   0.000000    -0.000000   0.000000   )
 (  0.000000   0.000000    -0.000000   0.000000     0.000000   0.000000   )
 (  0.000000   0.000000    -0.000000   0.000000     0.000000   0.000000   )
 (  0.000000   0.000000     0.000000   0.000000     0.000000   0.000000   )
 ( -0.000000   0.000000     0.000000   0.000000     0.000000   0.000000   )
 ( -0.000000   0.000000    -0.000000   0.000000     0.000000   0.000000   )
 (  0.000000   0.000000    -0.000000   0.000000     0.000000   0.000000   )
 ( -0.000000   0.000000    -0.000000   0.000000     0.000000   0.000000   )
 ( -0.000000   0.000000     0.000000   0.000000     0.000000   0.000000   )
 (  0.000000   0.000000    -0.000000   0.000000     0.000000   0.000000   )
 (  0.000000   0.000000     0.000000   0.000000    -0.000000   0.000000   )
 ( -0.000000   0.000000     0.000000   0.000000    -0.000000   0.000000   )
 (  0.000000   0.000000     0.000000   0.000000    -0.000000   0.000000   )
 (  0.000000   0.000000    -0.000000   0.000000    -0.000000   0.000000   )
 ( -0.000000   0.000000    -0.000000   0.000000    -0.000000   0.000000   )
 (  0.000000   0.000000     0.000000   0.000000    -0.000000   0.000000   )
 (  0.000000   0.000000    -0.000000   0.000000     0.000000   0.000000   )
 ( -0.000000   0.000000    -0.000000   0.000000     0.000000   0.000000   )
 ( -0.000000   0.000000     0.000000   0.000000     0.000000   0.000000   )
 (  0.000000   0.000000     0.000000   0.000000     0.000000   0.000000   )
 (  0.000000   0.000000     0.000000   0.000000     0.000000   0.000000   )
 ( -0.000000   0.000000    -0.000000   0.000000     0.000000   0.000000   )
 ( -0.000000   0.000000     0.000000   0.000000    -0.000000   0.000000   )
 ( -0.000000   0.000000     0.000000   0.000000    -0.000000   0.000000   )
 ( -0.000000   0.000000    -0.000000   0.000000    -0.000000   0.000000   )
 ( -0.000000   0.000000    -0.000000   0.000000    -0.000000   0.000000   )
 ( -0.000000   0.000000     0.000000   0.000000    -0.000000   0.000000   )
 ( -0.000000   0.000000     0.000000   0.000000    -0.000000   0.000000   )
 (  0.000000   0.000000    -0.000000   0.000000     0.000000   0.000000   )
 ( -0.000000   0.000000     0.000000   0.000000     0.000000   0.000000   )
 (  0.000000   0.000000     0.000000   0.000000     0.000000   0.000000   )
 (  0.000000   0.000000     0.000000   0.000000     0.000000   0.000000   )
 ( -0.000000   0.000000     0.000000   0.000000     0.000000   0.000000   )
 (  0.000000   0.000000     0.000000   0.000000     0.000000   0.000000   )
 ( -0.000000   0.000000    -0.000000   0.000000     0.000000   0.000000   )
 (  0.000000   0.000000     0.000000   0.000000     0.000000   0.000000   )
 ( -0.000000   0.000000     0.000000   0.000000     0.000000   0.000000   )
 ( -0.000000   0.000000     0.000000   0.000000     0.000000   0.000000   )
 ( -0.000000   0.000000    -0.000000   0.000000     0.000000   0.000000   )
 ( -0.000000   0.000000     0.000000   0.000000     0.000000   0.000000   )
 ( -0.000000   0.000000     0.000000   0.000000    -0.000000   0.000000   )
 ( -0.000000   0.000000    -0.000000   0.000000    -0.000000   0.000000   )
 ( -0.000000   0.000000    -0.000000   0.000000     0.000000   0.000000   )
 (  0.000000   0.000000     0.000000   0.000000    -0.000000   0.000000   )
 (  0.000000   0.000000    -0.000000   0.000000    -0.000000   0.000000   )
 (  0.000000   0.000000     0.000000   0.000000    -0.000000   0.000000   )
 (  0.000000   0.000000    -0.000000   0.000000    -0.000000   0.000000   )
 (  0.000000   0.000000    -0.000000   0.000000    -0.000000   0.000000   )
 ( -0.000000   0.000000     0.000000   0.000000    -0.000000   0.000000   )
 (  0.000000   0.000000    -0.000000   0.000000     0.000000   0.000000   )
 ( -0.000000   0.000000    -0.000000   0.000000     0.000000   0.000000   )
 ( -0.000000   0.000000    -0.000004   0.000000     0.000125   0.000000   )
 (  0.000000   0.000000    -0.000000   0.000000    -0.000000   0.000000   )
 (  0.000000   0.000000     0.000000   0.000000    -0.000000   0.000000   )
 (  0.000000   0.000000    -0.000000   0.000000    -0.000000   0.000000   )
 ( -0.000000   0.000000    -0.000000   0.000000     0.000000   0.000000   )
 (  0.000000   0.000000     0.000000   0.000000     0.000000   0.000000   )
 ( -0.000000   0.000000    -0.000000   0.000000     0.000000   0.000000   )
 ( -0.000000   0.000000     0.000000   0.000000     0.000000   0.000000   )
 ( -0.000000   0.000000     0.000000   0.000000     0.000000   0.000000   )
 (  0.000000   0.000000     0.000000   0.000000    -0.000000   0.000000   )
 (  0.000000   0.000000    -0.000000   0.000000    -0.000000   0.000000   )
 (  0.000000   0.000000    -0.000000   0.000000    -0.000000   0.000000   )
 (  0.000000   0.000000     0.000000   0.000000    -0.000000   0.000000   )
 ( -0.000000   0.000000    -0.000000   0.000000     0.000000   0.000000   )
 (  0.000000   0.000000    -0.000000   0.000000     0.000000   0.000000   )
 (  0.000000   0.000000     0.000000   0.000000     0.000000   0.000000   )
 ( -0.000000   0.000000     0.000006   0.000000     0.000313   0.000000   )
 ( -0.001508   0.000000     0.000915   0.000000     0.062303   0.000000   )
 (  0.000003   0.000000    -0.000010   0.000000     0.000246   0.000000   )
 (  0.000000   0.000000    -0.000000   0.000000     0.000000   0.000000   )
 (  0.000000   0.000000    -0.000000   0.000000     0.000000   0.000000   )
 (  0.000000   0.000000    -0.000000   0.000000     0.000000   0.000000   )
 ( -0.000000   0.000000     0.000000   0.000000    -0.000000   0.000000   )
 (  0.000000   0.000000    -0.000000   0.000000    -0.000000   0.000000   )
 ( -0.000000   0.000000    -0.000000   0.000000    -0.000000   0.000000   )
 (  0.000000   0.000000     0.000000   0.000000    -0.000000   0.000000   )
 (  0.000000   0.000000    -0.000000   0.000000    -0.000000   0.000000   )
 (  0.000000   0.000000    -0.000000   0.000000    -0.000000   0.000000   )
 (  0.000000   0.000000    -0.000000   0.000000     0.000000   0.000000   )
 (  0.000000   0.000000    -0.000000   0.000000     0.000000   0.000000   )
 (  0.000000   0.000000     0.000000   0.000000     0.000000   0.000000   )
 ( -0.000000   0.000000     0.000000   0.000000    -0.000000   0.000000   )
 ( -0.000000   0.000000    -0.000000   0.000000    -0.000000   0.000000   )
 ( -0.000000   0.000000    -0.000000   0.000000    -0.000000   0.000000   )
 (  0.000000   0.000000    -0.000000   0.000000    -0.000000   0.000000   )
 (  0.000000   0.000000    -0.000000   0.000000    -0.000000   0.000000   )
 (  0.000000   0.000000    -0.000000   0.000000    -0.000000   0.000000   )
 (  0.000000   0.000000    -0.000000   0.000000     0.000000   0.000000   )
 (  0.000000   0.000000    -0.000000   0.000000     0.000000   0.000000   )
 ( -0.000000   0.000000     0.000000   0.000000     0.000000   0.000000   )
 (  0.000000   0.000000     0.000000   0.000000     0.000000   0.000000   )
 (  0.000000   0.000000    -0.000000   0.000000     0.000000   0.000000   )
 ( -0.000000   0.000000     0.000000   0.000000     0.000000   0.000000   )
 (  0.000000   0.000000     0.000000   0.000000    -0.000000   0.000000   )
 (  0.000000   0.000000    -0.000000   0.000000     0.000000   0.000000   )
 ( -0.000000   0.000000    -0.000000   0.000000     0.000000   0.000000   )
 ( -0.000000   0.000000    -0.000000   0.000000    -0.000000   0.000000   )
 (  0.000000   0.000000     0.000000   0.000000     0.000000   0.000000   )
 ( -0.000000   0.000000     0.000000   0.000000     0.000000   0.000000   )
 (  0.000000   0.000000     0.000000   0.000000    -0.000000   0.000000   )
 ( -0.000000   0.000000    -0.000000   0.000000    -0.000000   0.000000   )
 (  0.000000   0.000000    -0.000000   0.000000    -0.000000   0.000000   )
 (  0.000000   0.000000    -0.000000   0.000000    -0.000000   0.000000   )
 ( -0.000000   0.000000     0.000000   0.000000    -0.000000   0.000000   )
 (  0.000000   0.000000     0.000000   0.000000    -0.000000   0.000000   )
 ( -0.000000   0.000000    -0.000000   0.000000    -0.000000   0.000000   )
 ( -0.000000   0.000000    -0.000000   0.000000     0.000000   0.000000   )
 (  0.000000   0.000000     0.000000   0.000000     0.000000   0.000000   )
 (  0.000000   0.000000     0.000000   0.000000     0.000000   0.000000   )
 (  0.000000   0.000000    -0.000000   0.000000     0.000000   0.000000   )
 (  0.000000   0.000000    -0.000000   0.000000     0.000000   0.000000   )
 ( -0.000000   0.000000     0.000000   0.000000    -0.000000   0.000000   )
 (  0.000000   0.000000    -0.000000   0.000000    -0.000000   0.000000   )
 ( -0.000000   0.000000     0.000000   0.000000    -0.000000   0.000000   )
 ( -0.000000   0.000000    -0.000000   0.000000    -0.000000   0.000000   )
 (  0.000000   0.000000     0.000000   0.000000    -0.000000   0.000000   )
 ( -0.000000   0.000000    -0.000000   0.000000    -0.000000   0.000000   )
 (  0.000000   0.000000     0.000000   0.000000     0.000000   0.000000   )
 ( -0.000000   0.000000    -0.000000   0.000000    -0.000000   0.000000   )
 (  0.000000   0.000000    -0.000000   0.000000     0.000000   0.000000   )
 ( -0.000000   0.000000    -0.000000   0.000000     0.000000   0.000000   )
 (  0.000000   0.000000     0.000000   0.000000    -0.000000   0.000000   )
 (  0.000000   0.000000    -0.000000   0.000000     0.000000   0.000000   )
 (  0.000000   0.000000    -0.000000   0.000000    -0.000000   0.000000   )
 (  0.000000   0.000000    -0.000000   0.000000    -0.000000   0.000000   )
 (  0.000000   0.000000     0.000000   0.000000    -0.000000   0.000000   )
 (  0.000000   0.000000     0.000000   0.000000    -0.000000   0.000000   )
 (  0.000000   0.000000    -0.000000   0.000000    -0.000000   0.000000   )
 (  0.000000   0.000000    -0.000000   0.000000    -0.000000   0.000000   )
 ( -0.000000   0.000000    -0.000000   0.000000     0.000000   0.000000   )
 ( -0.000000   0.000000    -0.000000   0.000000    -0.000000   0.000000   )
 (  0.000000   0.000000     0.000000   0.000000     0.000000   0.000000   )
 ( -0.000000   0.000000     0.000000   0.000000     0.000000   0.000000   )
 ( -0.000000   0.000000     0.000000   0.000000    -0.000000   0.000000   )
 ( -0.000000   0.000000    -0.000000   0.000000     0.000000   0.000000   )
 ( -0.000000   0.000000    -0.000000   0.000000     0.000000   0.000000   )
 (  0.000000   0.000000     0.000000   0.000000     0.000000   0.000000   )
 (  0.000000   0.000000    -0.000000   0.000000     0.000000   0.000000   )
 ( -0.000000   0.000000     0.000000   0.000000     0.000000   0.000000   )
 ( -0.000000   0.000000    -0.000000   0.000000     0.000000   0.000000   )
 (  0.000000   0.000000     0.000000   0.000000     0.000000   0.000000   )
 ( -0.000000   0.000000     0.000000   0.000000    -0.000000   0.000000   )
 (  0.000000   0.000000     0.000000   0.000000     0.000000   0.000000   )
 ( -0.000306   0.000000     0.000346   0.000000    -0.002802   0.000000   )
 ( -0.000000   0.000000     0.000000   0.000000     0.000000   0.000000   )
 ( -0.000000   0.000000     0.000000   0.000000     0.000000   0.000000   )
 ( -0.000000   0.000000    -0.000000   0.000000     0.000000   0.000000   )
 (  0.000000   0.000000     0.000000   0.000000     0.000000   0.000000   )
 ( -0.000000   0.000000     0.000000   0.000000     0.000000   0.000000   )
 ( -0.000000   0.000000    -0.000000   0.000000     0.000000   0.000000   )
 ( -0.000025   0.000000    -0.000046   0.000000    -0.005170   0.000000   )
 (  0.021633   0.000000    -0.006097   0.000000    -0.997777   0.000000   )
 ( -0.000036   0.000000     0.000108   0.000000    -0.004067   0.000000   )
     freq (  486) =     115.517254 [THz] =    3853.240846 [cm-1]
 (  0.000000   0.000000    -0.000000   0.000000    -0.000000   0.000000   )
 (  0.000000   0.000000    -0.000000   0.000000     0.000000   0.000000   )
 ( -0.000000   0.000000     0.000000   0.000000    -0.000000   0.000000   )
 (  0.000000   0.000000    -0.000000   0.000000     0.000000   0.000000   )
 (  0.000000   0.000000     0.000000   0.000000     0.000000   0.000000   )
 (  0.000000   0.000000    -0.000000   0.000000     0.000000   0.000000   )
 (  0.000000   0.000000     0.000000   0.000000    -0.000000   0.000000   )
 (  0.000000   0.000000    -0.000000   0.000000    -0.000000   0.000000   )
 (  0.000000   0.000000    -0.000000   0.000000    -0.000000   0.000000   )
 ( -0.000000   0.000000    -0.000000   0.000000    -0.000000   0.000000   )
 (  0.000000   0.000000    -0.000000   0.000000    -0.000000   0.000000   )
 (  0.000000   0.000000     0.000000   0.000000    -0.000000   0.000000   )
 (  0.000000   0.000000    -0.000000   0.000000     0.000000   0.000000   )
 ( -0.000000   0.000000     0.000000   0.000000     0.000000   0.000000   )
 (  0.000000   0.000000    -0.000000   0.000000     0.000000   0.000000   )
 (  0.000000   0.000000    -0.000000   0.000000     0.000000   0.000000   )
 ( -0.000000   0.000000     0.000000   0.000000     0.000000   0.000000   )
 (  0.000000   0.000000    -0.000000   0.000000     0.000000   0.000000   )
 (  0.000000   0.000000     0.000000   0.000000    -0.000000   0.000000   )
 ( -0.000000   0.000000     0.000000   0.000000     0.000000   0.000000   )
 ( -0.000000   0.000000    -0.000000   0.000000    -0.000000   0.000000   )
 (  0.000000   0.000000    -0.000000   0.000000    -0.000000   0.000000   )
 ( -0.000000   0.000000    -0.000000   0.000000     0.000000   0.000000   )
 (  0.000000   0.000000     0.000000   0.000000    -0.000000   0.000000   )
 (  0.000000   0.000000     0.000000   0.000000    -0.000000   0.000000   )
 ( -0.000000   0.000000     0.000000   0.000000    -0.000000   0.000000   )
 (  0.000000   0.000000    -0.000000   0.000000    -0.000000   0.000000   )
 ( -0.000000   0.000000    -0.000000   0.000000    -0.000000   0.000000   )
 ( -0.000000   0.000000     0.000000   0.000000    -0.000000   0.000000   )
 (  0.000000   0.000000    -0.000000   0.000000    -0.000000   0.000000   )
 ( -0.000000   0.000000    -0.000000   0.000000    -0.000000   0.000000   )
 (  0.000000   0.000000     0.000000   0.000000    -0.000000   0.000000   )
 (  0.000000   0.000000    -0.000000   0.000000    -0.000000   0.000000   )
 (  0.000000   0.000000     0.000000   0.000000    -0.000000   0.000000   )
 ( -0.000000   0.000000     0.000000   0.000000    -0.000000   0.000000   )
 (  0.000000   0.000000    -0.000000   0.000000    -0.000000   0.000000   )
 (  0.000000   0.000000    -0.000000   0.000000    -0.000000   0.000000   )
 (  0.000000   0.000000    -0.000000   0.000000    -0.000000   0.000000   )
 ( -0.000000   0.000000     0.000000   0.000000    -0.000000   0.000000   )
 (  0.000000   0.000000    -0.000000   0.000000    -0.000000   0.000000   )
 (  0.000000   0.000000    -0.000000   0.000000    -0.000000   0.000000   )
 ( -0.000000   0.000000     0.000000   0.000000    -0.000000   0.000000   )
 ( -0.000000   0.000000     0.000000   0.000000     0.000000   0.000000   )
 (  0.000000   0.000000     0.000000   0.000000     0.000000   0.000000   )
 ( -0.000000   0.000000    -0.000000   0.000000     0.000000   0.000000   )
 ( -0.000000   0.000000     0.000000   0.000000     0.000000   0.000000   )
 ( -0.000000   0.000000    -0.000000   0.000000     0.000000   0.000000   )
 (  0.000000   0.000000     0.000000   0.000000     0.000000   0.000000   )
 ( -0.000000   0.000000    -0.000000   0.000000     0.000000   0.000000   )
 (  0.000000   0.000000     0.000000   0.000000     0.000000   0.000000   )
 (  0.000000   0.000000    -0.000000   0.000000     0.000000   0.000000   )
 (  0.000000   0.000000     0.000000   0.000000     0.000000   0.000000   )
 (  0.000000   0.000000    -0.000000   0.000000     0.000000   0.000000   )
 (  0.000000   0.000000     0.000000   0.000000     0.000000   0.000000   )
 ( -0.000000   0.000000    -0.000000   0.000000    -0.000000   0.000000   )
 (  0.000000   0.000000     0.000000   0.000000    -0.000000   0.000000   )
 ( -0.000000   0.000000     0.000000   0.000000    -0.000000   0.000000   )
 ( -0.000000   0.000000     0.000000   0.000000    -0.000000   0.000000   )
 ( -0.000000   0.000000     0.000000   0.000000     0.000000   0.000000   )
 (  0.008050   0.000000    -0.001638   0.000000    -0.061600   0.000000   )
 (  0.000000   0.000000     0.000000   0.000000    -0.000000   0.000000   )
 ( -0.000000   0.000000    -0.000000   0.000000    -0.000000   0.000000   )
 ( -0.000000   0.000000     0.000000   0.000000    -0.000000   0.000000   )
 ( -0.000000   0.000000     0.000000   0.000000    -0.000000   0.000000   )
 ( -0.000000   0.000000     0.000000   0.000000    -0.000000   0.000000   )
 ( -0.000000   0.000000    -0.000000   0.000000    -0.000000   0.000000   )
 (  0.000000   0.000000     0.000000   0.000000     0.000000   0.000000   )
 ( -0.000000   0.000000    -0.000000   0.000000     0.000000   0.000000   )
 (  0.000000   0.000000    -0.000000   0.000000     0.000000   0.000000   )
 ( -0.000000   0.000000     0.000000   0.000000    -0.000000   0.000000   )
 (  0.000000   0.000000    -0.000000   0.000000    -0.000000   0.000000   )
 ( -0.000000   0.000000     0.000000   0.000000    -0.000000   0.000000   )
 ( -0.000000   0.000000    -0.000000   0.000000     0.000000   0.000000   )
 ( -0.000000   0.000000     0.000000   0.000000    -0.000000   0.000000   )
 (  0.000000   0.000000     0.000000   0.000000     0.000000   0.000000   )
 ( -0.000002   0.000000    -0.000004   0.000000     0.000019   0.000000   )
 ( -0.000001   0.000000     0.000003   0.000000     0.000175   0.000000   )
 (  0.000004   0.000000     0.000002   0.000000     0.000044   0.000000   )
 (  0.000000   0.000000     0.000000   0.000000     0.000000   0.000000   )
 ( -0.000000   0.000000    -0.000000   0.000000     0.000000   0.000000   )
 ( -0.000000   0.000000     0.000000   0.000000     0.000000   0.000000   )
 ( -0.000000   0.000000     0.000000   0.000000     0.000000   0.000000   )
 ( -0.000000   0.000000     0.000000   0.000000     0.000000   0.000000   )
 (  0.000000   0.000000    -0.000000   0.000000     0.000000   0.000000   )
 (  0.000000   0.000000     0.000000   0.000000    -0.000000   0.000000   )
 ( -0.000000   0.000000    -0.000000   0.000000    -0.000000   0.000000   )
 ( -0.000000   0.000000     0.000000   0.000000    -0.000000   0.000000   )
 ( -0.000000   0.000000     0.000000   0.000000     0.000000   0.000000   )
 ( -0.000000   0.000000    -0.000000   0.000000     0.000000   0.000000   )
 ( -0.000000   0.000000     0.000000   0.000000     0.000000   0.000000   )
 (  0.000000   0.000000    -0.000000   0.000000    -0.000000   0.000000   )
 ( -0.000000   0.000000     0.000000   0.000000     0.000000   0.000000   )
 (  0.000000   0.000000    -0.000000   0.000000     0.000000   0.000000   )
 (  0.000000   0.000000    -0.000000   0.000000    -0.000000   0.000000   )
 ( -0.000000   0.000000     0.000000   0.000000    -0.000000   0.000000   )
 (  0.000000   0.000000    -0.000000   0.000000    -0.000000   0.000000   )
 ( -0.000000   0.000000     0.000000   0.000000    -0.000000   0.000000   )
 (  0.000000   0.000000    -0.000000   0.000000    -0.000000   0.000000   )
 ( -0.000000   0.000000     0.000000   0.000000    -0.000000   0.000000   )
 ( -0.000000   0.000000    -0.000000   0.000000    -0.000000   0.000000   )
 (  0.000000   0.000000    -0.000000   0.000000    -0.000000   0.000000   )
 ( -0.000000   0.000000     0.000000   0.000000    -0.000000   0.000000   )
 ( -0.000000   0.000000    -0.000000   0.000000     0.000000   0.000000   )
 ( -0.000000   0.000000     0.000000   0.000000     0.000000   0.000000   )
 (  0.000000   0.000000    -0.000000   0.000000     0.000000   0.000000   )
 ( -0.000000   0.000000     0.000000   0.000000     0.000000   0.000000   )
 ( -0.000000   0.000000     0.000000   0.000000     0.000000   0.000000   )
 ( -0.000000   0.000000    -0.000000   0.000000     0.000000   0.000000   )
 ( -0.000000   0.000000    -0.000000   0.000000    -0.000000   0.000000   )
 (  0.000000   0.000000     0.000000   0.000000    -0.000000   0.000000   )
 ( -0.000000   0.000000     0.000000   0.000000     0.000000   0.000000   )
 (  0.000000   0.000000     0.000000   0.000000    -0.000000   0.000000   )
 (  0.000000   0.000000    -0.000000   0.000000    -0.000000   0.000000   )
 ( -0.000000   0.000000    -0.000000   0.000000     0.000000   0.000000   )
 ( -0.000000   0.000000     0.000000   0.000000     0.000000   0.000000   )
 (  0.000000   0.000000    -0.000000   0.000000     0.000000   0.000000   )
 ( -0.000000   0.000000     0.000000   0.000000     0.000000   0.000000   )
 ( -0.000000   0.000000     0.000000   0.000000     0.000000   0.000000   )
 (  0.000000   0.000000    -0.000000   0.000000     0.000000   0.000000   )
 ( -0.000000   0.000000    -0.000000   0.000000     0.000000   0.000000   )
 (  0.000000   0.000000     0.000000   0.000000    -0.000000   0.000000   )
 ( -0.000000   0.000000     0.000000   0.000000     0.000000   0.000000   )
 (  0.000000   0.000000    -0.000000   0.000000     0.000000   0.000000   )
 (  0.000000   0.000000    -0.000000   0.000000    -0.000000   0.000000   )
 ( -0.000000   0.000000     0.000000   0.000000     0.000000   0.000000   )
 (  0.000000   0.000000     0.000000   0.000000     0.000000   0.000000   )
 (  0.000000   0.000000     0.000000   0.000000    -0.000000   0.000000   )
 ( -0.000000   0.000000    -0.000000   0.000000    -0.000000   0.000000   )
 (  0.000000   0.000000     0.000000   0.000000    -0.000000   0.000000   )
 (  0.000000   0.000000    -0.000000   0.000000    -0.000000   0.000000   )
 ( -0.000000   0.000000     0.000000   0.000000    -0.000000   0.000000   )
 ( -0.000000   0.000000     0.000000   0.000000    -0.000000   0.000000   )
 (  0.000000   0.000000     0.000000   0.000000    -0.000000   0.000000   )
 ( -0.000000   0.000000    -0.000000   0.000000    -0.000000   0.000000   )
 (  0.000000   0.000000    -0.000000   0.000000    -0.000000   0.000000   )
 ( -0.000000   0.000000    -0.000000   0.000000    -0.000000   0.000000   )
 (  0.000000   0.000000     0.000000   0.000000    -0.000000   0.000000   )
 (  0.000000   0.000000    -0.000000   0.000000    -0.000000   0.000000   )
 ( -0.000000   0.000000    -0.000000   0.000000    -0.000000   0.000000   )
 ( -0.000000   0.000000     0.000000   0.000000    -0.000000   0.000000   )
 (  0.000000   0.000000    -0.000000   0.000000    -0.000000   0.000000   )
 ( -0.000000   0.000000     0.000000   0.000000    -0.000000   0.000000   )
 ( -0.000000   0.000000     0.000000   0.000000    -0.000000   0.000000   )
 ( -0.000000   0.000000    -0.000000   0.000000    -0.000000   0.000000   )
 (  0.000000   0.000000     0.000000   0.000000     0.000000   0.000000   )
 ( -0.000000   0.000000     0.000000   0.000000     0.000000   0.000000   )
 (  0.000000   0.000000    -0.000000   0.000000     0.000000   0.000000   )
 (  0.000000   0.000000    -0.000000   0.000000     0.000000   0.000000   )
 ( -0.000000   0.000000     0.000000   0.000000     0.000000   0.000000   )
 (  0.000000   0.000000     0.000000   0.000000     0.000000   0.000000   )
 (  0.000000   0.000000    -0.000000   0.000000    -0.000000   0.000000   )
 (  0.000000   0.000000    -0.000000   0.000000    -0.000000   0.000000   )
 ( -0.124765   0.000000     0.025816   0.000000     0.989898   0.000000   )
 (  0.000000   0.000000    -0.000000   0.000000    -0.000000   0.000000   )
 ( -0.000000   0.000000     0.000000   0.000000    -0.000000   0.000000   )
 (  0.000000   0.000000     0.000000   0.000000    -0.000000   0.000000   )
 (  0.000000   0.000000     0.000000   0.000000     0.000000   0.000000   )
 (  0.000000   0.000000    -0.000000   0.000000     0.000000   0.000000   )
 ( -0.000000   0.000000    -0.000000   0.000000     0.000000   0.000000   )
 ( -0.000059   0.000000    -0.000020   0.000000    -0.000091   0.000000   )
 (  0.000184   0.000000    -0.000125   0.000000    -0.002675   0.000000   )
 ( -0.000019   0.000000     0.000079   0.000000    -0.000510   0.000000   )
 **************************************************************************
