# Supplementary material for: Theoretical OH stretching vibrations in dravite
Source: Copernicus journal article supplement (doi:10.5194/ejm-34-239-2022), 2022-04-13
Supplement: Supplementary file 3 [file ejm-34-239-2022-supplement.zip › ejm-2021-65-supplement-version2/supplementary_files/Structure_and_eigendisplacement_files/chemically_disordered_models_simple_hexagonal_cell/dravite_Mg_Al_vacancy.cif]

#======================================================================

# CRYSTAL DATA

#----------------------------------------------------------------------

data_VESTA_phase_1


_pd_phase_name                         ''
_cell_length_a                         16.10679
_cell_length_b                         16.10679
_cell_length_c                         7.27903
_cell_angle_alpha                      90
_cell_angle_beta                       90
_cell_angle_gamma                      120
_symmetry_space_group_name_H-M         'P 1'
_symmetry_Int_Tables_number            1

loop_
_symmetry_equiv_pos_as_xyz
   'x, y, z'

loop_
   _atom_site_label
   _atom_site_occupancy
   _atom_site_fract_x
   _atom_site_fract_y
   _atom_site_fract_z
   _atom_site_adp_type
   _atom_site_B_iso_or_equiv
   _atom_site_type_symbol
   Na         1.0     0.001203      0.000050      0.275198     Biso  1.000000 Na
   Na         1.0     0.669502      0.336096      0.608937     Biso  1.000000 Na
   Mg         1.0     0.126433      0.063658      0.647335     Biso  1.000000 Mg
   Mg         1.0     0.936171      0.063428      0.645821     Biso  1.000000 Mg
   Mg         1.0     0.936745      0.873504      0.641723     Biso  1.000000 Mg
   Mg         1.0     0.794437      0.397611      0.978626     Biso  1.000000 Mg
   Mg         1.0     0.603468      0.396561      0.978719     Biso  1.000000 Mg
   Mg         1.0     0.603573      0.206877      0.978592     Biso  1.000000 Mg
   Mg         1.0     0.458608      0.729269      0.309280     Biso  1.000000 Mg
   Al         1.0     0.269224      0.729648      0.319592     Biso  1.000000 Al
   Mg         1.0     0.270483      0.541943      0.309094     Biso  1.000000 Mg
   Al         1.0     0.298312      0.261961      0.633124     Biso  1.000000 Al
   Al         1.0     0.737383      0.036706      0.631880     Biso  1.000000 Al
   Al         1.0     0.964357      0.701946      0.631360     Biso  1.000000 Al
   Al         1.0     0.738061      0.701537      0.632408     Biso  1.000000 Al
   Al         1.0     0.963713      0.262758      0.632583     Biso  1.000000 Al
   Al         1.0     0.298380      0.036030      0.631819     Biso  1.000000 Al
   Al         1.0     0.965425      0.596577      0.965022     Biso  1.000000 Al
   Al         1.0     0.404730      0.369905      0.965973     Biso  1.000000 Al
   Al         1.0     0.628050      0.032959      0.965043     Biso  1.000000 Al
   Al         1.0     0.405001      0.035771      0.966130     Biso  1.000000 Al
   Al         1.0     0.629898      0.595192      0.965402     Biso  1.000000 Al
   Al         1.0     0.967521      0.372814      0.964596     Biso  1.000000 Al
   Al         1.0     0.630464      0.926637      0.299268     Biso  1.000000 Al
   Mg         1.0     0.072159      0.703287      0.297344     Biso  1.000000 Mg
   Al         1.0     0.296475      0.368867      0.299582     Biso  1.000000 Al
   Al         1.0     0.073491      0.370071      0.299145     Biso  1.000000 Al
   Al         1.0     0.297615      0.927908      0.299592     Biso  1.000000 Al
   Al         1.0     0.631022      0.702950      0.299130     Biso  1.000000 Al
   Si         1.0     0.191822      0.189789      0.016945     Biso  1.000000 Si
   Si         1.0     0.808012      0.002574      0.015851     Biso  1.000000 Si
   Si         1.0     0.996193      0.806429      0.012322     Biso  1.000000 Si
   Si         1.0     0.808852      0.808639      0.014981     Biso  1.000000 Si
   Si         1.0     0.997881      0.191328      0.016301     Biso  1.000000 Si
   Si         1.0     0.191941      0.000110      0.016015     Biso  1.000000 Si
   Si         1.0     0.857690      0.523050      0.351665     Biso  1.000000 Si
   Si         1.0     0.474530      0.334431      0.349165     Biso  1.000000 Si
   Si         1.0     0.664412      0.140096      0.348292     Biso  1.000000 Si
   Si         1.0     0.476084      0.141135      0.349320     Biso  1.000000 Si
   Si         1.0     0.663052      0.523133      0.349390     Biso  1.000000 Si
   Si         1.0     0.859860      0.335197      0.348305     Biso  1.000000 Si
   Si         1.0     0.525800      0.856324      0.684504     Biso  1.000000 Si
   Si         1.0     0.145905      0.669392      0.689945     Biso  1.000000 Si
   Si         1.0     0.331233      0.473841      0.684538     Biso  1.000000 Si
   Si         1.0     0.143804      0.474443      0.685312     Biso  1.000000 Si
   Si         1.0     0.331097      0.855880      0.689997     Biso  1.000000 Si
   Si         1.0     0.525638      0.668407      0.684191     Biso  1.000000 Si
   B          1.0     0.109831      0.220441      0.474116     Biso  1.000000 B
   B          1.0     0.779355      0.889881      0.472329     Biso  1.000000 B
   B          1.0     0.109850      0.890613      0.477818     Biso  1.000000 B
   B          1.0     0.777151      0.553947      0.807598     Biso  1.000000 B
   B          1.0     0.446722      0.223270      0.806094     Biso  1.000000 B
   B          1.0     0.776948      0.223190      0.807183     Biso  1.000000 B
   B          1.0     0.441075      0.886694      0.148550     Biso  1.000000 B
   B          1.0     0.115218      0.559949      0.138093     Biso  1.000000 B
   B          1.0     0.443583      0.556249      0.144055     Biso  1.000000 B
   O          1.0    -0.000872      0.000315      0.793012     Biso  1.000000 O
   O          1.0     0.666819      0.332725      0.126206     Biso  1.000000 O
   O          1.0     0.330389      0.672881      0.460659     Biso  1.000000 O
   O          1.0     0.061489      0.124065      0.498645     Biso  1.000000 O
   O          1.0     0.875832      0.938554      0.495837     Biso  1.000000 O
   O          1.0     0.063856      0.941930      0.496103     Biso  1.000000 O
   O          1.0     0.728370      0.457223      0.831533     Biso  1.000000 O
   O          1.0     0.543239      0.271495      0.829597     Biso  1.000000 O
   O          1.0     0.728749      0.271483      0.831542     Biso  1.000000 O
   O          1.0     0.387606      0.791632      0.188818     Biso  1.000000 O
   O          1.0     0.210545      0.613230      0.184666     Biso  1.000000 O
   O          1.0     0.396210      0.603548      0.175696     Biso  1.000000 O
   O          1.0     0.270631      0.135142      0.532753     Biso  1.000000 O
   O          1.0     0.864472      0.135384      0.531693     Biso  1.000000 O
   O          1.0     0.862854      0.729773      0.531199     Biso  1.000000 O
   O          1.0     0.935487      0.467034      0.862577     Biso  1.000000 O
   O          1.0     0.531199      0.467830      0.865850     Biso  1.000000 O
   O          1.0     0.531014      0.062806      0.865863     Biso  1.000000 O
   O          1.0     0.602693      0.801010      0.197316     Biso  1.000000 O
   O          1.0     0.215061      0.800634      0.194512     Biso  1.000000 O
   O          1.0     0.199325      0.396905      0.197986     Biso  1.000000 O
   O          1.0     0.091294      0.183601      0.085851     Biso  1.000000 O
   O          1.0     0.812488      0.907822      0.085058     Biso  1.000000 O
   O          1.0     0.093227      0.904730      0.084062     Biso  1.000000 O
   O          1.0     0.754684      0.513021      0.417731     Biso  1.000000 O
   O          1.0     0.479835      0.240023      0.420272     Biso  1.000000 O
   O          1.0     0.760579      0.238790      0.414407     Biso  1.000000 O
   O          1.0     0.427714      0.854072      0.753976     Biso  1.000000 O
   O          1.0     0.147797      0.572791      0.757176     Biso  1.000000 O
   O          1.0     0.427003      0.572610      0.750931     Biso  1.000000 O
   O          1.0     0.183771      0.090899      0.106261     Biso  1.000000 O
   O          1.0     0.905767      0.093829      0.106869     Biso  1.000000 O
   O          1.0     0.909145      0.820872      0.104137     Biso  1.000000 O
   O          1.0     0.848568      0.423013      0.440365     Biso  1.000000 O
   O          1.0     0.571289      0.425881      0.440595     Biso  1.000000 O
   O          1.0     0.575174      0.150145      0.439152     Biso  1.000000 O
   O          1.0     0.523544      0.761407      0.775347     Biso  1.000000 O
   O          1.0     0.239763      0.762353      0.787775     Biso  1.000000 O
   O          1.0     0.238218      0.475258      0.776135     Biso  1.000000 O
   O          1.0     0.198782      0.189344      0.795554     Biso  1.000000 O
   O          1.0     0.809874      0.010083      0.794524     Biso  1.000000 O
   O          1.0     0.988436      0.802517      0.791461     Biso  1.000000 O
   O          1.0     0.809255      0.802094      0.793613     Biso  1.000000 O
   O          1.0     0.990535      0.189848      0.794891     Biso  1.000000 O
   O          1.0     0.199356      0.009232      0.794791     Biso  1.000000 O
   O          1.0     0.865515      0.521568      0.130231     Biso  1.000000 O
   O          1.0     0.476361      0.341125      0.127723     Biso  1.000000 O
   O          1.0     0.654663      0.131973      0.127458     Biso  1.000000 O
   O          1.0     0.476907      0.136012      0.127760     Biso  1.000000 O
   O          1.0     0.656064      0.522193      0.128044     Biso  1.000000 O
   O          1.0     0.868092      0.344190      0.127436     Biso  1.000000 O
   O          1.0     0.531995      0.855230      0.462615     Biso  1.000000 O
   O          1.0     0.159222      0.680754      0.469476     Biso  1.000000 O
   O          1.0     0.323015      0.467557      0.462881     Biso  1.000000 O
   O          1.0     0.145295      0.468353      0.463263     Biso  1.000000 O
   O          1.0     0.321532      0.851021      0.466208     Biso  1.000000 O
   O          1.0     0.532323      0.676927      0.462549     Biso  1.000000 O
   O          1.0     0.284260      0.284987      0.101366     Biso  1.000000 O
   O          1.0     0.712333     -0.001040      0.100420     Biso  1.000000 O
   O          1.0     0.993193      0.711750      0.089853     Biso  1.000000 O
   O          1.0     0.714704      0.715336      0.100828     Biso  1.000000 O
   O          1.0     1.002112      0.287164      0.100673     Biso  1.000000 O
   O          1.0     0.285186     -0.001220      0.100768     Biso  1.000000 O
   O          1.0     0.945958      0.615618      0.444239     Biso  1.000000 O
   O          1.0     0.379454      0.331637      0.433423     Biso  1.000000 O
   O          1.0     0.665592      0.047082      0.433605     Biso  1.000000 O
   O          1.0     0.382087      0.047430      0.434723     Biso  1.000000 O
   O          1.0     0.667124      0.618984      0.433578     Biso  1.000000 O
   O          1.0     0.952756      0.333727      0.433587     Biso  1.000000 O
   O          1.0     0.618368      0.953001      0.766341     Biso  1.000000 O
   O          1.0     0.047620      0.664935      0.761369     Biso  1.000000 O
   O          1.0     0.334857      0.381025      0.767020     Biso  1.000000 O
   O          1.0     0.046957      0.381419      0.765828     Biso  1.000000 O
   O          1.0     0.335495      0.953338      0.766920     Biso  1.000000 O
   O          1.0     0.618358      0.664974      0.766787     Biso  1.000000 O
   O          1.0     0.210018      0.271095      0.462814     Biso  1.000000 O
   O          1.0     0.728393      0.939346      0.461303     Biso  1.000000 O
   O          1.0     0.060879      0.792479      0.475175     Biso  1.000000 O
   O          1.0     0.728214      0.789751      0.461172     Biso  1.000000 O
   O          1.0     0.060825      0.271586      0.461806     Biso  1.000000 O
   O          1.0     0.211328      0.939483      0.460914     Biso  1.000000 O
   O          1.0     0.876624      0.604673      0.796351     Biso  1.000000 O
   O          1.0     0.395434      0.272112      0.795552     Biso  1.000000 O
   O          1.0     0.726889      0.122825      0.795467     Biso  1.000000 O
   O          1.0     0.395684      0.122961      0.795051     Biso  1.000000 O
   O          1.0     0.727370      0.604640      0.796226     Biso  1.000000 O
   O          1.0     0.877012      0.272080      0.795763     Biso  1.000000 O
   O          1.0     0.540821      0.932388      0.127005     Biso  1.000000 O
   O          1.0     0.062511      0.603697      0.110126     Biso  1.000000 O
   O          1.0     0.394642      0.455467      0.130200     Biso  1.000000 O
   O          1.0     0.068719      0.458822      0.126223     Biso  1.000000 O
   O          1.0     0.397741      0.942607      0.134200     Biso  1.000000 O
   O          1.0     0.544225      0.605552      0.129485     Biso  1.000000 O
   H          1.0    -0.004216     -0.005304      0.924309     Biso  1.000000 H
   H          1.0     0.670022      0.337175      0.257663     Biso  1.000000 H
   H          1.0     0.326538      0.671696      0.593190     Biso  1.000000 H
   H          1.0     0.268649      0.134290      0.399284     Biso  1.000000 H
   H          1.0     0.865332      0.135068      0.398164     Biso  1.000000 H
   H          1.0     0.862817      0.728394      0.397805     Biso  1.000000 H
   H          1.0     0.935644      0.467627      0.729096     Biso  1.000000 H
   H          1.0     0.530729      0.467982      0.732342     Biso  1.000000 H
   H          1.0     0.530199      0.061840      0.732404     Biso  1.000000 H
   H          1.0     0.600180      0.799724      0.063670     Biso  1.000000 H
   H          1.0     0.218329      0.796905      0.060969     Biso  1.000000 H
   H          1.0     0.200470      0.399836      0.064343     Biso  1.000000 H
