# Supplementary material for: Theoretical OH stretching vibrations in dravite
Source: Copernicus journal article supplement (doi:10.5194/ejm-34-239-2022), 2022-04-13
Supplement: Supplementary file 3 [file ejm-34-239-2022-supplement.zip › ejm-2021-65-supplement-version2/supplementary_files/Structure_and_eigendisplacement_files/chemically_disordered_models_simple_hexagonal_cell/dravite_Mg_Al_vacancy.txt]

     freq (  480) =     106.705204 [THz] =    3559.302466 [cm-1]
 (  0.000000   0.000000    -0.000000   0.000000    -0.000000   0.000000   )
 ( -0.000000   0.000000    -0.000000   0.000000    -0.000000   0.000000   )
 (  0.000000   0.000000    -0.000000   0.000000    -0.000000   0.000000   )
 (  0.000000   0.000000    -0.000000   0.000000    -0.000000   0.000000   )
 (  0.000000   0.000000     0.000000   0.000000    -0.000000   0.000000   )
 ( -0.000000   0.000000    -0.000000   0.000000     0.000000   0.000000   )
 ( -0.000000   0.000000    -0.000000   0.000000     0.000000   0.000000   )
 ( -0.000000   0.000000    -0.000000   0.000000     0.000000   0.000000   )
 ( -0.000000   0.000000     0.000000   0.000000    -0.000000   0.000000   )
 ( -0.000000   0.000000     0.000000   0.000000    -0.000000   0.000000   )
 ( -0.000000   0.000000     0.000000   0.000000    -0.000000   0.000000   )
 (  0.000000   0.000000    -0.000000   0.000000    -0.000000   0.000000   )
 (  0.000000   0.000000     0.000000   0.000000    -0.000000   0.000000   )
 ( -0.000000   0.000000     0.000000   0.000000    -0.000000   0.000000   )
 (  0.000000   0.000000     0.000000   0.000000    -0.000000   0.000000   )
 (  0.000000   0.000000    -0.000000   0.000000    -0.000000   0.000000   )
 ( -0.000000   0.000000     0.000000   0.000000    -0.000000   0.000000   )
 ( -0.000000   0.000000    -0.000000   0.000000     0.000000   0.000000   )
 (  0.000000   0.000000    -0.000000   0.000000     0.000000   0.000000   )
 ( -0.000000   0.000000    -0.000000   0.000000     0.000000   0.000000   )
 ( -0.000000   0.000000     0.000000   0.000000     0.000000   0.000000   )
 (  0.000000   0.000000     0.000000   0.000000     0.000000   0.000000   )
 ( -0.000000   0.000000    -0.000000   0.000000     0.000000   0.000000   )
 ( -0.000000   0.000000     0.000000   0.000000    -0.000000   0.000000   )
 (  0.000000   0.000000     0.000000   0.000000    -0.000000   0.000000   )
 (  0.000000   0.000000    -0.000000   0.000000    -0.000000   0.000000   )
 ( -0.000000   0.000000    -0.000000   0.000000    -0.000000   0.000000   )
 ( -0.000000   0.000000    -0.000000   0.000000    -0.000000   0.000000   )
 (  0.000000   0.000000     0.000000   0.000000    -0.000000   0.000000   )
 (  0.000000   0.000000    -0.000000   0.000000     0.000000   0.000000   )
 (  0.000000   0.000000    -0.000000   0.000000     0.000000   0.000000   )
 (  0.000000   0.000000     0.000000   0.000000     0.000000   0.000000   )
 (  0.000000   0.000000     0.000000   0.000000     0.000000   0.000000   )
 (  0.000000   0.000000    -0.000000   0.000000     0.000000   0.000000   )
 (  0.000000   0.000000    -0.000000   0.000000     0.000000   0.000000   )
 ( -0.000000   0.000000     0.000000   0.000000    -0.000000   0.000000   )
 (  0.000000   0.000000    -0.000000   0.000000     0.000000   0.000000   )
 ( -0.000000   0.000000    -0.000000   0.000000    -0.000000   0.000000   )
 ( -0.000000   0.000000    -0.000000   0.000000    -0.000000   0.000000   )
 ( -0.000000   0.000000    -0.000000   0.000000    -0.000000   0.000000   )
 ( -0.000000   0.000000    -0.000000   0.000000    -0.000000   0.000000   )
 (  0.000000   0.000000     0.000000   0.000000    -0.000000   0.000000   )
 ( -0.000000   0.000000    -0.000000   0.000000    -0.000000   0.000000   )
 (  0.000000   0.000000    -0.000000   0.000000    -0.000000   0.000000   )
 (  0.000000   0.000000    -0.000000   0.000000    -0.000000   0.000000   )
 (  0.000000   0.000000     0.000000   0.000000    -0.000000   0.000000   )
 (  0.000000   0.000000    -0.000000   0.000000    -0.000000   0.000000   )
 (  0.000000   0.000000    -0.000000   0.000000     0.000000   0.000000   )
 (  0.000000   0.000000     0.000000   0.000000     0.000000   0.000000   )
 (  0.000000   0.000000     0.000000   0.000000    -0.000000   0.000000   )
 ( -0.000000   0.000000    -0.000000   0.000000     0.000000   0.000000   )
 ( -0.000000   0.000000     0.000000   0.000000    -0.000000   0.000000   )
 ( -0.000000   0.000000    -0.000000   0.000000     0.000000   0.000000   )
 ( -0.000000   0.000000    -0.000000   0.000000     0.000000   0.000000   )
 (  0.000000   0.000000     0.000000   0.000000     0.000000   0.000000   )
 (  0.000000   0.000000    -0.000000   0.000000     0.000000   0.000000   )
 ( -0.000000   0.000000     0.000000   0.000000    -0.000000   0.000000   )
 (  0.000000   0.000000     0.000000   0.000000    -0.000000   0.000000   )
 ( -0.000007   0.000000     0.000014   0.000000    -0.000286   0.000000   )
 ( -0.000000   0.000000     0.000000   0.000000    -0.000000   0.000000   )
 ( -0.000000   0.000000    -0.000000   0.000000    -0.000000   0.000000   )
 ( -0.000000   0.000000     0.000000   0.000000     0.000000   0.000000   )
 (  0.000000   0.000000     0.000000   0.000000    -0.000000   0.000000   )
 (  0.000000   0.000000     0.000000   0.000000    -0.000000   0.000000   )
 (  0.000000   0.000000     0.000000   0.000000    -0.000000   0.000000   )
 (  0.000000   0.000000     0.000000   0.000000     0.000000   0.000000   )
 (  0.000000   0.000000    -0.000000   0.000000     0.000000   0.000000   )
 ( -0.000000   0.000000    -0.000000   0.000000     0.000000   0.000000   )
 ( -0.000000   0.000000     0.000000   0.000000     0.000000   0.000000   )
 ( -0.000000   0.000000     0.000000   0.000000     0.000000   0.000000   )
 ( -0.000000   0.000000    -0.000000   0.000000     0.000000   0.000000   )
 (  0.000000   0.000000     0.000000   0.000000    -0.000000   0.000000   )
 ( -0.000000   0.000000     0.000000   0.000000    -0.000000   0.000000   )
 ( -0.000000   0.000000    -0.000000   0.000000    -0.000000   0.000000   )
 (  0.000012   0.000000    -0.000002   0.000000     0.000169   0.000000   )
 (  0.004723   0.000000    -0.003199   0.000000    -0.062424   0.000000   )
 ( -0.000001   0.000000    -0.000004   0.000000     0.000163   0.000000   )
 ( -0.000000   0.000000     0.000000   0.000000    -0.000000   0.000000   )
 ( -0.000000   0.000000     0.000000   0.000000    -0.000000   0.000000   )
 ( -0.000000   0.000000     0.000000   0.000000    -0.000000   0.000000   )
 (  0.000000   0.000000    -0.000000   0.000000     0.000000   0.000000   )
 ( -0.000000   0.000000     0.000000   0.000000     0.000000   0.000000   )
 (  0.000000   0.000000     0.000000   0.000000     0.000000   0.000000   )
 ( -0.000000   0.000000    -0.000000   0.000000     0.000000   0.000000   )
 ( -0.000000   0.000000     0.000000   0.000000     0.000000   0.000000   )
 ( -0.000000   0.000000     0.000000   0.000000     0.000000   0.000000   )
 ( -0.000000   0.000000     0.000000   0.000000    -0.000000   0.000000   )
 ( -0.000000   0.000000     0.000000   0.000000    -0.000000   0.000000   )
 ( -0.000000   0.000000    -0.000000   0.000000    -0.000000   0.000000   )
 (  0.000000   0.000000    -0.000000   0.000000     0.000000   0.000000   )
 (  0.000000   0.000000     0.000000   0.000000     0.000000   0.000000   )
 (  0.000000   0.000000     0.000000   0.000000     0.000000   0.000000   )
 ( -0.000000   0.000000     0.000000   0.000000    -0.000000   0.000000   )
 ( -0.000000   0.000000     0.000000   0.000000     0.000000   0.000000   )
 ( -0.000000   0.000000     0.000000   0.000000    -0.000000   0.000000   )
 ( -0.000000   0.000000     0.000000   0.000000    -0.000000   0.000000   )
 ( -0.000000   0.000000     0.000000   0.000000    -0.000000   0.000000   )
 (  0.000000   0.000000    -0.000000   0.000000    -0.000000   0.000000   )
 ( -0.000000   0.000000    -0.000000   0.000000    -0.000000   0.000000   )
 ( -0.000000   0.000000     0.000000   0.000000    -0.000000   0.000000   )
 (  0.000000   0.000000    -0.000000   0.000000    -0.000000   0.000000   )
 ( -0.000000   0.000000    -0.000000   0.000000    -0.000000   0.000000   )
 ( -0.000000   0.000000     0.000000   0.000000    -0.000000   0.000000   )
 (  0.000000   0.000000     0.000000   0.000000    -0.000000   0.000000   )
 (  0.000000   0.000000     0.000000   0.000000    -0.000000   0.000000   )
 ( -0.000000   0.000000    -0.000000   0.000000    -0.000000   0.000000   )
 (  0.000000   0.000000    -0.000000   0.000000    -0.000000   0.000000   )
 ( -0.000000   0.000000    -0.000000   0.000000     0.000000   0.000000   )
 (  0.000000   0.000000     0.000000   0.000000     0.000000   0.000000   )
 ( -0.000000   0.000000     0.000000   0.000000     0.000000   0.000000   )
 ( -0.000000   0.000000     0.000000   0.000000     0.000000   0.000000   )
 (  0.000000   0.000000    -0.000000   0.000000     0.000000   0.000000   )
 ( -0.000000   0.000000     0.000000   0.000000     0.000000   0.000000   )
 ( -0.000000   0.000000     0.000000   0.000000     0.000000   0.000000   )
 (  0.000000   0.000000     0.000000   0.000000    -0.000000   0.000000   )
 ( -0.000000   0.000000    -0.000000   0.000000    -0.000000   0.000000   )
 ( -0.000000   0.000000    -0.000000   0.000000     0.000000   0.000000   )
 ( -0.000000   0.000000     0.000000   0.000000    -0.000000   0.000000   )
 ( -0.000000   0.000000     0.000000   0.000000    -0.000000   0.000000   )
 (  0.000000   0.000000    -0.000000   0.000000     0.000000   0.000000   )
 ( -0.000000   0.000000     0.000000   0.000000     0.000000   0.000000   )
 (  0.000000   0.000000    -0.000000   0.000000     0.000000   0.000000   )
 (  0.000000   0.000000     0.000000   0.000000     0.000000   0.000000   )
 ( -0.000000   0.000000    -0.000000   0.000000     0.000000   0.000000   )
 (  0.000000   0.000000     0.000000   0.000000     0.000000   0.000000   )
 ( -0.000000   0.000000    -0.000000   0.000000    -0.000000   0.000000   )
 (  0.000000   0.000000     0.000000   0.000000     0.000000   0.000000   )
 ( -0.000000   0.000000     0.000000   0.000000    -0.000000   0.000000   )
 (  0.000000   0.000000     0.000000   0.000000    -0.000000   0.000000   )
 (  0.000000   0.000000    -0.000000   0.000000     0.000000   0.000000   )
 ( -0.000000   0.000000     0.000000   0.000000    -0.000000   0.000000   )
 ( -0.000000   0.000000     0.000000   0.000000    -0.000000   0.000000   )
 ( -0.000000   0.000000     0.000000   0.000000     0.000000   0.000000   )
 ( -0.000000   0.000000    -0.000000   0.000000     0.000000   0.000000   )
 ( -0.000000   0.000000    -0.000000   0.000000     0.000000   0.000000   )
 ( -0.000000   0.000000     0.000000   0.000000     0.000000   0.000000   )
 ( -0.000000   0.000000     0.000000   0.000000     0.000000   0.000000   )
 (  0.000000   0.000000     0.000000   0.000000    -0.000000   0.000000   )
 (  0.000000   0.000000     0.000000   0.000000     0.000000   0.000000   )
 ( -0.000000   0.000000    -0.000000   0.000000    -0.000000   0.000000   )
 (  0.000000   0.000000    -0.000000   0.000000    -0.000000   0.000000   )
 (  0.000000   0.000000    -0.000000   0.000000     0.000000   0.000000   )
 (  0.000000   0.000000     0.000000   0.000000    -0.000000   0.000000   )
 (  0.000000   0.000000     0.000000   0.000000    -0.000000   0.000000   )
 ( -0.000000   0.000000    -0.000000   0.000000    -0.000000   0.000000   )
 ( -0.000000   0.000000     0.000000   0.000000    -0.000000   0.000000   )
 (  0.000000   0.000000    -0.000000   0.000000    -0.000000   0.000000   )
 (  0.000000   0.000000     0.000000   0.000000    -0.000000   0.000000   )
 ( -0.000000   0.000000    -0.000000   0.000000    -0.000000   0.000000   )
 (  0.000000   0.000000    -0.000000   0.000000     0.000000   0.000000   )
 ( -0.000000   0.000000    -0.000000   0.000000    -0.000000   0.000000   )
 (  0.000813   0.000000    -0.000821   0.000000     0.005816   0.000000   )
 (  0.000000   0.000000    -0.000000   0.000000    -0.000000   0.000000   )
 (  0.000000   0.000000    -0.000000   0.000000    -0.000000   0.000000   )
 (  0.000000   0.000000     0.000000   0.000000    -0.000000   0.000000   )
 ( -0.000000   0.000000    -0.000000   0.000000    -0.000000   0.000000   )
 (  0.000000   0.000000    -0.000000   0.000000    -0.000000   0.000000   )
 (  0.000000   0.000000     0.000000   0.000000    -0.000000   0.000000   )
 ( -0.000076   0.000000     0.000002   0.000000    -0.002496   0.000000   )
 ( -0.071161   0.000000     0.043217   0.000000     0.994531   0.000000   )
 ( -0.000022   0.000000     0.000045   0.000000    -0.002433   0.000000   )
     freq (  481) =     108.704413 [THz] =    3625.988914 [cm-1]
 (  0.000000   0.000000     0.000000   0.000000    -0.000000   0.000000   )
 (  0.000000   0.000000    -0.000000   0.000000    -0.000000   0.000000   )
 ( -0.000000   0.000000     0.000000   0.000000    -0.000000   0.000000   )
 (  0.000000   0.000000     0.000000   0.000000    -0.000000   0.000000   )
 (  0.000000   0.000000     0.000000   0.000000    -0.000000   0.000000   )
 (  0.000000   0.000000    -0.000000   0.000000     0.000000   0.000000   )
 ( -0.000000   0.000000    -0.000000   0.000000     0.000000   0.000000   )
 ( -0.000000   0.000000     0.000000   0.000000     0.000000   0.000000   )
 ( -0.000000   0.000000    -0.000000   0.000000    -0.000000   0.000000   )
 ( -0.000000   0.000000    -0.000000   0.000000    -0.000000   0.000000   )
 (  0.000000   0.000000    -0.000000   0.000000    -0.000000   0.000000   )
 ( -0.000000   0.000000    -0.000000   0.000000    -0.000000   0.000000   )
 (  0.000000   0.000000     0.000000   0.000000    -0.000000   0.000000   )
 ( -0.000000   0.000000     0.000000   0.000000    -0.000000   0.000000   )
 (  0.000000   0.000000     0.000000   0.000000    -0.000000   0.000000   )
 (  0.000000   0.000000    -0.000000   0.000000    -0.000000   0.000000   )
 ( -0.000000   0.000000     0.000000   0.000000    -0.000000   0.000000   )
 (  0.000000   0.000000     0.000000   0.000000     0.000000   0.000000   )
 (  0.000000   0.000000    -0.000000   0.000000     0.000000   0.000000   )
 (  0.000000   0.000000     0.000000   0.000000    -0.000000   0.000000   )
 ( -0.000000   0.000000     0.000000   0.000000     0.000000   0.000000   )
 ( -0.000000   0.000000     0.000000   0.000000     0.000000   0.000000   )
 ( -0.000000   0.000000    -0.000000   0.000000     0.000000   0.000000   )
 (  0.000000   0.000000     0.000000   0.000000     0.000000   0.000000   )
 ( -0.000000   0.000000    -0.000000   0.000000    -0.000000   0.000000   )
 ( -0.000000   0.000000    -0.000000   0.000000    -0.000000   0.000000   )
 (  0.000000   0.000000    -0.000000   0.000000    -0.000000   0.000000   )
 ( -0.000000   0.000000     0.000000   0.000000    -0.000000   0.000000   )
 (  0.000000   0.000000    -0.000000   0.000000     0.000000   0.000000   )
 ( -0.000000   0.000000     0.000000   0.000000     0.000000   0.000000   )
 (  0.000000   0.000000     0.000000   0.000000     0.000000   0.000000   )
 ( -0.000000   0.000000     0.000000   0.000000     0.000000   0.000000   )
 (  0.000000   0.000000     0.000000   0.000000     0.000000   0.000000   )
 (  0.000000   0.000000     0.000000   0.000000     0.000000   0.000000   )
 ( -0.000000   0.000000     0.000000   0.000000     0.000000   0.000000   )
 (  0.000000   0.000000    -0.000000   0.000000    -0.000000   0.000000   )
 ( -0.000000   0.000000    -0.000000   0.000000    -0.000000   0.000000   )
 (  0.000000   0.000000     0.000000   0.000000     0.000000   0.000000   )
 ( -0.000000   0.000000     0.000000   0.000000     0.000000   0.000000   )
 ( -0.000000   0.000000    -0.000000   0.000000    -0.000000   0.000000   )
 (  0.000000   0.000000    -0.000000   0.000000    -0.000000   0.000000   )
 (  0.000000   0.000000     0.000000   0.000000     0.000000   0.000000   )
 ( -0.000000   0.000000     0.000000   0.000000    -0.000000   0.000000   )
 (  0.000000   0.000000     0.000000   0.000000    -0.000000   0.000000   )
 ( -0.000000   0.000000     0.000000   0.000000    -0.000000   0.000000   )
 (  0.000000   0.000000     0.000000   0.000000    -0.000000   0.000000   )
 (  0.000000   0.000000     0.000000   0.000000    -0.000000   0.000000   )
 (  0.000000   0.000000     0.000000   0.000000    -0.000000   0.000000   )
 (  0.000000   0.000000     0.000000   0.000000     0.000000   0.000000   )
 ( -0.000000   0.000000     0.000000   0.000000    -0.000000   0.000000   )
 ( -0.000000   0.000000    -0.000000   0.000000     0.000000   0.000000   )
 (  0.000000   0.000000    -0.000000   0.000000     0.000000   0.000000   )
 ( -0.000000   0.000000    -0.000000   0.000000     0.000000   0.000000   )
 ( -0.000000   0.000000     0.000000   0.000000     0.000000   0.000000   )
 (  0.000000   0.000000    -0.000000   0.000000     0.000000   0.000000   )
 ( -0.000000   0.000000    -0.000000   0.000000     0.000000   0.000000   )
 ( -0.000000   0.000000    -0.000000   0.000000    -0.000000   0.000000   )
 (  0.000000   0.000000     0.000000   0.000000    -0.000000   0.000000   )
 (  0.000018   0.000000    -0.000021   0.000000    -0.000188   0.000000   )
 ( -0.000000   0.000000    -0.000000   0.000000     0.000000   0.000000   )
 ( -0.000000   0.000000    -0.000000   0.000000    -0.000000   0.000000   )
 (  0.000000   0.000000    -0.000000   0.000000    -0.000000   0.000000   )
 (  0.000000   0.000000     0.000000   0.000000    -0.000000   0.000000   )
 ( -0.000000   0.000000     0.000000   0.000000    -0.000000   0.000000   )
 (  0.000000   0.000000     0.000000   0.000000    -0.000000   0.000000   )
 (  0.000000   0.000000    -0.000000   0.000000     0.000000   0.000000   )
 ( -0.000000   0.000000     0.000000   0.000000     0.000000   0.000000   )
 (  0.000000   0.000000     0.000000   0.000000    -0.000000   0.000000   )
 (  0.000000   0.000000    -0.000000   0.000000     0.000000   0.000000   )
 ( -0.000000   0.000000    -0.000000   0.000000     0.000000   0.000000   )
 ( -0.000000   0.000000    -0.000000   0.000000    -0.000000   0.000000   )
 (  0.000000   0.000000    -0.000000   0.000000    -0.000000   0.000000   )
 ( -0.000000   0.000000    -0.000000   0.000000    -0.000000   0.000000   )
 ( -0.000000   0.000000    -0.000000   0.000000    -0.000000   0.000000   )
 (  0.000057   0.000000     0.000036   0.000000     0.002142   0.000000   )
 (  0.000012   0.000000    -0.000007   0.000000    -0.000136   0.000000   )
 ( -0.000362   0.000000     0.002397   0.000000    -0.062287   0.000000   )
 ( -0.000000   0.000000    -0.000000   0.000000    -0.000000   0.000000   )
 ( -0.000000   0.000000    -0.000000   0.000000     0.000000   0.000000   )
 (  0.000000   0.000000    -0.000000   0.000000     0.000000   0.000000   )
 (  0.000000   0.000000     0.000000   0.000000     0.000000   0.000000   )
 (  0.000000   0.000000    -0.000000   0.000000     0.000000   0.000000   )
 ( -0.000000   0.000000    -0.000000   0.000000     0.000000   0.000000   )
 ( -0.000000   0.000000    -0.000000   0.000000    -0.000000   0.000000   )
 (  0.000000   0.000000    -0.000000   0.000000     0.000000   0.000000   )
 ( -0.000000   0.000000    -0.000000   0.000000     0.000000   0.000000   )
 (  0.000000   0.000000    -0.000000   0.000000    -0.000000   0.000000   )
 ( -0.000000   0.000000    -0.000000   0.000000    -0.000000   0.000000   )
 ( -0.000000   0.000000    -0.000000   0.000000     0.000000   0.000000   )
 ( -0.000000   0.000000     0.000000   0.000000     0.000000   0.000000   )
 (  0.000000   0.000000     0.000000   0.000000     0.000000   0.000000   )
 (  0.000000   0.000000    -0.000000   0.000000     0.000000   0.000000   )
 ( -0.000000   0.000000    -0.000000   0.000000    -0.000000   0.000000   )
 ( -0.000000   0.000000    -0.000000   0.000000     0.000000   0.000000   )
 ( -0.000000   0.000000    -0.000000   0.000000     0.000000   0.000000   )
 ( -0.000000   0.000000     0.000000   0.000000    -0.000000   0.000000   )
 ( -0.000000   0.000000    -0.000000   0.000000    -0.000000   0.000000   )
 (  0.000000   0.000000    -0.000000   0.000000    -0.000000   0.000000   )
 ( -0.000000   0.000000    -0.000000   0.000000    -0.000000   0.000000   )
 (  0.000000   0.000000     0.000000   0.000000    -0.000000   0.000000   )
 (  0.000000   0.000000    -0.000000   0.000000    -0.000000   0.000000   )
 ( -0.000000   0.000000     0.000000   0.000000    -0.000000   0.000000   )
 (  0.000000   0.000000     0.000000   0.000000    -0.000000   0.000000   )
 ( -0.000000   0.000000    -0.000000   0.000000    -0.000000   0.000000   )
 (  0.000000   0.000000     0.000000   0.000000    -0.000000   0.000000   )
 (  0.000000   0.000000     0.000000   0.000000    -0.000000   0.000000   )
 ( -0.000000   0.000000     0.000000   0.000000    -0.000000   0.000000   )
 ( -0.000000   0.000000    -0.000000   0.000000    -0.000000   0.000000   )
 (  0.000000   0.000000    -0.000000   0.000000     0.000000   0.000000   )
 ( -0.000000   0.000000     0.000000   0.000000     0.000000   0.000000   )
 (  0.000000   0.000000     0.000000   0.000000     0.000000   0.000000   )
 (  0.000000   0.000000    -0.000000   0.000000     0.000000   0.000000   )
 ( -0.000000   0.000000    -0.000000   0.000000     0.000000   0.000000   )
 (  0.000000   0.000000    -0.000000   0.000000    -0.000000   0.000000   )
 ( -0.000000   0.000000    -0.000000   0.000000     0.000000   0.000000   )
 (  0.000000   0.000000    -0.000000   0.000000    -0.000000   0.000000   )
 ( -0.000000   0.000000     0.000000   0.000000     0.000000   0.000000   )
 ( -0.000000   0.000000    -0.000000   0.000000    -0.000000   0.000000   )
 (  0.000000   0.000000    -0.000000   0.000000     0.000000   0.000000   )
 (  0.000000   0.000000     0.000000   0.000000     0.000000   0.000000   )
 (  0.000000   0.000000     0.000000   0.000000     0.000000   0.000000   )
 ( -0.000000   0.000000    -0.000000   0.000000     0.000000   0.000000   )
 (  0.000000   0.000000    -0.000000   0.000000     0.000000   0.000000   )
 ( -0.000000   0.000000     0.000000   0.000000     0.000000   0.000000   )
 ( -0.000000   0.000000     0.000000   0.000000     0.000000   0.000000   )
 ( -0.000000   0.000000    -0.000000   0.000000    -0.000000   0.000000   )
 (  0.000000   0.000000    -0.000000   0.000000    -0.000000   0.000000   )
 ( -0.000000   0.000000     0.000000   0.000000     0.000000   0.000000   )
 (  0.000000   0.000000     0.000000   0.000000     0.000000   0.000000   )
 (  0.000000   0.000000    -0.000000   0.000000    -0.000000   0.000000   )
 ( -0.000000   0.000000    -0.000000   0.000000    -0.000000   0.000000   )
 (  0.000000   0.000000    -0.000000   0.000000     0.000000   0.000000   )
 ( -0.000000   0.000000    -0.000000   0.000000    -0.000000   0.000000   )
 (  0.000000   0.000000    -0.000000   0.000000     0.000000   0.000000   )
 ( -0.000000   0.000000    -0.000000   0.000000    -0.000000   0.000000   )
 ( -0.000000   0.000000    -0.000000   0.000000     0.000000   0.000000   )
 (  0.000000   0.000000    -0.000000   0.000000     0.000000   0.000000   )
 (  0.000000   0.000000     0.000000   0.000000    -0.000000   0.000000   )
 ( -0.000000   0.000000     0.000000   0.000000    -0.000000   0.000000   )
 (  0.000000   0.000000     0.000000   0.000000    -0.000000   0.000000   )
 (  0.000000   0.000000     0.000000   0.000000    -0.000000   0.000000   )
 ( -0.000000   0.000000     0.000000   0.000000    -0.000000   0.000000   )
 (  0.000000   0.000000     0.000000   0.000000    -0.000000   0.000000   )
 (  0.000000   0.000000    -0.000000   0.000000     0.000000   0.000000   )
 ( -0.000000   0.000000     0.000000   0.000000    -0.000000   0.000000   )
 (  0.000000   0.000000     0.000000   0.000000    -0.000000   0.000000   )
 ( -0.000000   0.000000     0.000000   0.000000    -0.000000   0.000000   )
 (  0.000000   0.000000    -0.000000   0.000000     0.000000   0.000000   )
 (  0.000000   0.000000     0.000000   0.000000    -0.000000   0.000000   )
 (  0.000000   0.000000     0.000000   0.000000     0.000000   0.000000   )
 ( -0.000000   0.000000    -0.000000   0.000000    -0.000000   0.000000   )
 ( -0.000240   0.000000     0.000683   0.000000     0.003631   0.000000   )
 ( -0.000000   0.000000     0.000000   0.000000    -0.000000   0.000000   )
 (  0.000000   0.000000     0.000000   0.000000    -0.000000   0.000000   )
 (  0.000000   0.000000     0.000000   0.000000    -0.000000   0.000000   )
 ( -0.000000   0.000000     0.000000   0.000000    -0.000000   0.000000   )
 (  0.000000   0.000000     0.000000   0.000000    -0.000000   0.000000   )
 (  0.000000   0.000000     0.000000   0.000000    -0.000000   0.000000   )
 ( -0.000666   0.000000    -0.000425   0.000000    -0.034133   0.000000   )
 ( -0.000183   0.000000     0.000085   0.000000     0.002336   0.000000   )
 (  0.005503   0.000000    -0.029338   0.000000     0.997013   0.000000   )
     freq (  482) =     108.827250 [THz] =    3630.086326 [cm-1]
 (  0.000000   0.000000     0.000000   0.000000     0.000000   0.000000   )
 ( -0.000000   0.000000    -0.000000   0.000000     0.000000   0.000000   )
 (  0.000000   0.000000     0.000000   0.000000     0.000000   0.000000   )
 (  0.000000   0.000000     0.000000   0.000000     0.000000   0.000000   )
 (  0.000000   0.000000    -0.000000   0.000000     0.000000   0.000000   )
 (  0.000000   0.000000     0.000000   0.000000    -0.000000   0.000000   )
 ( -0.000000   0.000000    -0.000000   0.000000    -0.000000   0.000000   )
 ( -0.000000   0.000000    -0.000000   0.000000    -0.000000   0.000000   )
 ( -0.000000   0.000000    -0.000000   0.000000     0.000000   0.000000   )
 ( -0.000000   0.000000    -0.000000   0.000000     0.000000   0.000000   )
 ( -0.000000   0.000000     0.000000   0.000000     0.000000   0.000000   )
 ( -0.000000   0.000000     0.000000   0.000000     0.000000   0.000000   )
 ( -0.000000   0.000000    -0.000000   0.000000     0.000000   0.000000   )
 (  0.000000   0.000000    -0.000000   0.000000     0.000000   0.000000   )
 ( -0.000000   0.000000    -0.000000   0.000000     0.000000   0.000000   )
 (  0.000000   0.000000     0.000000   0.000000     0.000000   0.000000   )
 (  0.000000   0.000000    -0.000000   0.000000     0.000000   0.000000   )
 (  0.000000   0.000000    -0.000000   0.000000    -0.000000   0.000000   )
 (  0.000000   0.000000     0.000000   0.000000    -0.000000   0.000000   )
 ( -0.000000   0.000000    -0.000000   0.000000    -0.000000   0.000000   )
 (  0.000000   0.000000     0.000000   0.000000    -0.000000   0.000000   )
 ( -0.000000   0.000000     0.000000   0.000000    -0.000000   0.000000   )
 (  0.000000   0.000000     0.000000   0.000000    -0.000000   0.000000   )
 ( -0.000000   0.000000     0.000000   0.000000     0.000000   0.000000   )
 (  0.000000   0.000000    -0.000000   0.000000     0.000000   0.000000   )
 (  0.000000   0.000000     0.000000   0.000000     0.000000   0.000000   )
 ( -0.000000   0.000000     0.000000   0.000000     0.000000   0.000000   )
 ( -0.000000   0.000000    -0.000000   0.000000     0.000000   0.000000   )
 (  0.000000   0.000000    -0.000000   0.000000     0.000000   0.000000   )
 (  0.000000   0.000000     0.000000   0.000000    -0.000000   0.000000   )
 (  0.000000   0.000000     0.000000   0.000000    -0.000000   0.000000   )
 (  0.000000   0.000000    -0.000000   0.000000    -0.000000   0.000000   )
 (  0.000000   0.000000     0.000000   0.000000    -0.000000   0.000000   )
 (  0.000000   0.000000     0.000000   0.000000    -0.000000   0.000000   )
 (  0.000000   0.000000     0.000000   0.000000    -0.000000   0.000000   )
 (  0.000000   0.000000    -0.000000   0.000000    -0.000000   0.000000   )
 ( -0.000000   0.000000    -0.000000   0.000000     0.000000   0.000000   )
 ( -0.000000   0.000000     0.000000   0.000000     0.000000   0.000000   )
 ( -0.000000   0.000000    -0.000000   0.000000     0.000000   0.000000   )
 (  0.000000   0.000000    -0.000000   0.000000     0.000000   0.000000   )
 (  0.000000   0.000000     0.000000   0.000000    -0.000000   0.000000   )
 (  0.000000   0.000000    -0.000000   0.000000     0.000000   0.000000   )
 (  0.000000   0.000000     0.000000   0.000000     0.000000   0.000000   )
 (  0.000000   0.000000     0.000000   0.000000     0.000000   0.000000   )
 (  0.000000   0.000000     0.000000   0.000000     0.000000   0.000000   )
 (  0.000000   0.000000    -0.000000   0.000000     0.000000   0.000000   )
 ( -0.000000   0.000000     0.000000   0.000000     0.000000   0.000000   )
 (  0.000000   0.000000     0.000000   0.000000     0.000000   0.000000   )
 (  0.000000   0.000000     0.000000   0.000000     0.000000   0.000000   )
 (  0.000000   0.000000    -0.000000   0.000000    -0.000000   0.000000   )
 ( -0.000000   0.000000     0.000000   0.000000    -0.000000   0.000000   )
 ( -0.000000   0.000000    -0.000000   0.000000    -0.000000   0.000000   )
 ( -0.000000   0.000000    -0.000000   0.000000    -0.000000   0.000000   )
 ( -0.000000   0.000000    -0.000000   0.000000    -0.000000   0.000000   )
 (  0.000000   0.000000     0.000000   0.000000    -0.000000   0.000000   )
 ( -0.000000   0.000000    -0.000000   0.000000    -0.000000   0.000000   )
 ( -0.000000   0.000000    -0.000000   0.000000     0.000000   0.000000   )
 (  0.000000   0.000000     0.000000   0.000000     0.000000   0.000000   )
 ( -0.000038   0.000000    -0.000010   0.000000     0.000145   0.000000   )
 ( -0.000000   0.000000    -0.000000   0.000000     0.000000   0.000000   )
 ( -0.000000   0.000000    -0.000000   0.000000    -0.000000   0.000000   )
 ( -0.000000   0.000000     0.000000   0.000000     0.000000   0.000000   )
 (  0.000000   0.000000    -0.000000   0.000000     0.000000   0.000000   )
 (  0.000000   0.000000     0.000000   0.000000     0.000000   0.000000   )
 ( -0.000000   0.000000     0.000000   0.000000     0.000000   0.000000   )
 (  0.000000   0.000000     0.000000   0.000000    -0.000000   0.000000   )
 ( -0.000000   0.000000    -0.000000   0.000000    -0.000000   0.000000   )
 (  0.000000   0.000000     0.000000   0.000000     0.000000   0.000000   )
 ( -0.000000   0.000000    -0.000000   0.000000    -0.000000   0.000000   )
 (  0.000000   0.000000    -0.000000   0.000000    -0.000000   0.000000   )
 ( -0.000000   0.000000     0.000000   0.000000    -0.000000   0.000000   )
 ( -0.000000   0.000000    -0.000000   0.000000     0.000000   0.000000   )
 (  0.000000   0.000000    -0.000000   0.000000     0.000000   0.000000   )
 ( -0.000000   0.000000     0.000000   0.000000     0.000000   0.000000   )
 (  0.001715   0.000000     0.001061   0.000000     0.062260   0.000000   )
 ( -0.000009   0.000000     0.000011   0.000000     0.000149   0.000000   )
 (  0.000013   0.000000    -0.000083   0.000000     0.002121   0.000000   )
 ( -0.000000   0.000000    -0.000000   0.000000     0.000000   0.000000   )
 ( -0.000000   0.000000    -0.000000   0.000000     0.000000   0.000000   )
 ( -0.000000   0.000000    -0.000000   0.000000    -0.000000   0.000000   )
 ( -0.000000   0.000000     0.000000   0.000000    -0.000000   0.000000   )
 (  0.000000   0.000000     0.000000   0.000000    -0.000000   0.000000   )
 (  0.000000   0.000000    -0.000000   0.000000    -0.000000   0.000000   )
 ( -0.000000   0.000000     0.000000   0.000000    -0.000000   0.000000   )
 ( -0.000000   0.000000    -0.000000   0.000000    -0.000000   0.000000   )
 ( -0.000000   0.000000    -0.000000   0.000000    -0.000000   0.000000   )
 ( -0.000000   0.000000    -0.000000   0.000000    -0.000000   0.000000   )
 ( -0.000000   0.000000    -0.000000   0.000000     0.000000   0.000000   )
 ( -0.000000   0.000000    -0.000000   0.000000     0.000000   0.000000   )
 ( -0.000000   0.000000    -0.000000   0.000000    -0.000000   0.000000   )
 (  0.000000   0.000000     0.000000   0.000000    -0.000000   0.000000   )
 (  0.000000   0.000000    -0.000000   0.000000    -0.000000   0.000000   )
 ( -0.000000   0.000000    -0.000000   0.000000    -0.000000   0.000000   )
 ( -0.000000   0.000000    -0.000000   0.000000    -0.000000   0.000000   )
 ( -0.000000   0.000000    -0.000000   0.000000    -0.000000   0.000000   )
 ( -0.000000   0.000000    -0.000000   0.000000     0.000000   0.000000   )
 (  0.000000   0.000000     0.000000   0.000000     0.000000   0.000000   )
 ( -0.000000   0.000000     0.000000   0.000000     0.000000   0.000000   )
 (  0.000000   0.000000     0.000000   0.000000     0.000000   0.000000   )
 ( -0.000000   0.000000    -0.000000   0.000000     0.000000   0.000000   )
 ( -0.000000   0.000000    -0.000000   0.000000     0.000000   0.000000   )
 ( -0.000000   0.000000     0.000000   0.000000     0.000000   0.000000   )
 (  0.000000   0.000000     0.000000   0.000000     0.000000   0.000000   )
 (  0.000000   0.000000    -0.000000   0.000000     0.000000   0.000000   )
 (  0.000000   0.000000     0.000000   0.000000     0.000000   0.000000   )
 ( -0.000000   0.000000     0.000000   0.000000     0.000000   0.000000   )
 (  0.000000   0.000000    -0.000000   0.000000     0.000000   0.000000   )
 (  0.000000   0.000000     0.000000   0.000000    -0.000000   0.000000   )
 ( -0.000000   0.000000    -0.000000   0.000000    -0.000000   0.000000   )
 ( -0.000000   0.000000    -0.000000   0.000000    -0.000000   0.000000   )
 ( -0.000000   0.000000    -0.000000   0.000000    -0.000000   0.000000   )
 ( -0.000000   0.000000     0.000000   0.000000    -0.000000   0.000000   )
 (  0.000000   0.000000     0.000000   0.000000    -0.000000   0.000000   )
 ( -0.000000   0.000000     0.000000   0.000000     0.000000   0.000000   )
 ( -0.000000   0.000000    -0.000000   0.000000     0.000000   0.000000   )
 ( -0.000000   0.000000     0.000000   0.000000     0.000000   0.000000   )
 ( -0.000000   0.000000     0.000000   0.000000     0.000000   0.000000   )
 (  0.000000   0.000000    -0.000000   0.000000     0.000000   0.000000   )
 ( -0.000000   0.000000    -0.000000   0.000000     0.000000   0.000000   )
 ( -0.000000   0.000000    -0.000000   0.000000    -0.000000   0.000000   )
 (  0.000000   0.000000    -0.000000   0.000000    -0.000000   0.000000   )
 (  0.000000   0.000000    -0.000000   0.000000    -0.000000   0.000000   )
 (  0.000000   0.000000     0.000000   0.000000    -0.000000   0.000000   )
 (  0.000000   0.000000     0.000000   0.000000    -0.000000   0.000000   )
 ( -0.000000   0.000000    -0.000000   0.000000    -0.000000   0.000000   )
 ( -0.000000   0.000000     0.000000   0.000000    -0.000000   0.000000   )
 ( -0.000000   0.000000    -0.000000   0.000000     0.000000   0.000000   )
 (  0.000000   0.000000    -0.000000   0.000000     0.000000   0.000000   )
 ( -0.000000   0.000000    -0.000000   0.000000     0.000000   0.000000   )
 ( -0.000000   0.000000     0.000000   0.000000     0.000000   0.000000   )
 (  0.000000   0.000000    -0.000000   0.000000    -0.000000   0.000000   )
 ( -0.000000   0.000000    -0.000000   0.000000    -0.000000   0.000000   )
 ( -0.000000   0.000000    -0.000000   0.000000    -0.000000   0.000000   )
 ( -0.000000   0.000000     0.000000   0.000000    -0.000000   0.000000   )
 ( -0.000000   0.000000     0.000000   0.000000    -0.000000   0.000000   )
 ( -0.000000   0.000000    -0.000000   0.000000    -0.000000   0.000000   )
 ( -0.000000   0.000000    -0.000000   0.000000    -0.000000   0.000000   )
 (  0.000000   0.000000     0.000000   0.000000     0.000000   0.000000   )
 (  0.000000   0.000000    -0.000000   0.000000     0.000000   0.000000   )
 (  0.000000   0.000000     0.000000   0.000000     0.000000   0.000000   )
 ( -0.000000   0.000000     0.000000   0.000000     0.000000   0.000000   )
 (  0.000000   0.000000    -0.000000   0.000000     0.000000   0.000000   )
 (  0.000000   0.000000     0.000000   0.000000     0.000000   0.000000   )
 (  0.000000   0.000000    -0.000000   0.000000     0.000000   0.000000   )
 ( -0.000000   0.000000    -0.000000   0.000000    -0.000000   0.000000   )
 (  0.000000   0.000000     0.000000   0.000000     0.000000   0.000000   )
 (  0.000000   0.000000    -0.000000   0.000000     0.000000   0.000000   )
 (  0.000000   0.000000    -0.000000   0.000000     0.000000   0.000000   )
 ( -0.000000   0.000000     0.000000   0.000000     0.000000   0.000000   )
 (  0.000000   0.000000     0.000000   0.000000    -0.000000   0.000000   )
 ( -0.000000   0.000000    -0.000000   0.000000     0.000000   0.000000   )
 (  0.000837   0.000000     0.000362   0.000000    -0.003071   0.000000   )
 (  0.000000   0.000000     0.000000   0.000000     0.000000   0.000000   )
 (  0.000000   0.000000     0.000000   0.000000     0.000000   0.000000   )
 (  0.000000   0.000000    -0.000000   0.000000     0.000000   0.000000   )
 (  0.000000   0.000000     0.000000   0.000000     0.000000   0.000000   )
 ( -0.000000   0.000000     0.000000   0.000000     0.000000   0.000000   )
 (  0.000000   0.000000    -0.000000   0.000000     0.000000   0.000000   )
 ( -0.020079   0.000000    -0.012189   0.000000    -0.997186   0.000000   )
 (  0.000169   0.000000    -0.000138   0.000000    -0.002576   0.000000   )
 ( -0.000210   0.000000     0.001014   0.000000    -0.034127   0.000000   )
     freq (  483) =     112.065789 [THz] =    3738.112341 [cm-1]
 ( -0.000000   0.000000    -0.000000   0.000000     0.000000   0.000000   )
 ( -0.000000   0.000000    -0.000000   0.000000    -0.000000   0.000000   )
 ( -0.000000   0.000000    -0.000000   0.000000    -0.000000   0.000000   )
 (  0.000000   0.000000    -0.000000   0.000000    -0.000000   0.000000   )
 ( -0.000000   0.000000     0.000000   0.000000    -0.000000   0.000000   )
 ( -0.000000   0.000000    -0.000000   0.000000     0.000000   0.000000   )
 ( -0.000000   0.000000    -0.000000   0.000000     0.000000   0.000000   )
 ( -0.000000   0.000000     0.000000   0.000000     0.000000   0.000000   )
 (  0.000000   0.000000     0.000000   0.000000     0.000000   0.000000   )
 ( -0.000000   0.000000     0.000000   0.000000     0.000000   0.000000   )
 ( -0.000000   0.000000     0.000000   0.000000     0.000000   0.000000   )
 (  0.000000   0.000000    -0.000000   0.000000    -0.000000   0.000000   )
 (  0.000000   0.000000    -0.000000   0.000000    -0.000000   0.000000   )
 ( -0.000000   0.000000     0.000000   0.000000    -0.000000   0.000000   )
 (  0.000000   0.000000     0.000000   0.000000    -0.000000   0.000000   )
 ( -0.000000   0.000000    -0.000000   0.000000    -0.000000   0.000000   )
 ( -0.000000   0.000000     0.000000   0.000000    -0.000000   0.000000   )
 ( -0.000000   0.000000     0.000000   0.000000     0.000000   0.000000   )
 (  0.000000   0.000000    -0.000000   0.000000     0.000000   0.000000   )
 (  0.000000   0.000000     0.000000   0.000000     0.000000   0.000000   )
 ( -0.000000   0.000000     0.000000   0.000000     0.000000   0.000000   )
 (  0.000000   0.000000     0.000000   0.000000     0.000000   0.000000   )
 ( -0.000000   0.000000    -0.000000   0.000000     0.000000   0.000000   )
 ( -0.000000   0.000000    -0.000000   0.000000     0.000000   0.000000   )
 (  0.000000   0.000000     0.000000   0.000000     0.000000   0.000000   )
 ( -0.000000   0.000000     0.000000   0.000000     0.000000   0.000000   )
 (  0.000000   0.000000     0.000000   0.000000     0.000000   0.000000   )
 (  0.000000   0.000000    -0.000000   0.000000     0.000000   0.000000   )
 ( -0.000000   0.000000    -0.000000   0.000000     0.000000   0.000000   )
 (  0.000000   0.000000    -0.000000   0.000000     0.000000   0.000000   )
 ( -0.000000   0.000000    -0.000000   0.000000     0.000000   0.000000   )
 ( -0.000000   0.000000     0.000000   0.000000     0.000000   0.000000   )
 ( -0.000000   0.000000    -0.000000   0.000000     0.000000   0.000000   )
 (  0.000000   0.000000    -0.000000   0.000000     0.000000   0.000000   )
 (  0.000000   0.000000     0.000000   0.000000     0.000000   0.000000   )
 ( -0.000000   0.000000     0.000000   0.000000     0.000000   0.000000   )
 ( -0.000000   0.000000    -0.000000   0.000000     0.000000   0.000000   )
 (  0.000000   0.000000    -0.000000   0.000000     0.000000   0.000000   )
 ( -0.000000   0.000000    -0.000000   0.000000     0.000000   0.000000   )
 ( -0.000000   0.000000     0.000000   0.000000     0.000000   0.000000   )
 (  0.000000   0.000000    -0.000000   0.000000     0.000000   0.000000   )
 (  0.000000   0.000000     0.000000   0.000000    -0.000000   0.000000   )
 ( -0.000000   0.000000     0.000000   0.000000    -0.000000   0.000000   )
 (  0.000000   0.000000    -0.000000   0.000000    -0.000000   0.000000   )
 ( -0.000000   0.000000    -0.000000   0.000000    -0.000000   0.000000   )
 ( -0.000000   0.000000     0.000000   0.000000    -0.000000   0.000000   )
 (  0.000000   0.000000     0.000000   0.000000    -0.000000   0.000000   )
 (  0.000000   0.000000     0.000000   0.000000    -0.000000   0.000000   )
 ( -0.000000   0.000000    -0.000000   0.000000    -0.000000   0.000000   )
 (  0.000000   0.000000    -0.000000   0.000000    -0.000000   0.000000   )
 ( -0.000000   0.000000    -0.000000   0.000000    -0.000000   0.000000   )
 (  0.000000   0.000000     0.000000   0.000000    -0.000000   0.000000   )
 ( -0.000000   0.000000    -0.000000   0.000000    -0.000000   0.000000   )
 (  0.000000   0.000000    -0.000000   0.000000     0.000000   0.000000   )
 (  0.000000   0.000000     0.000000   0.000000     0.000000   0.000000   )
 ( -0.000000   0.000000     0.000000   0.000000     0.000000   0.000000   )
 ( -0.000000   0.000000     0.000000   0.000000     0.000000   0.000000   )
 (  0.000000   0.000000     0.000000   0.000000    -0.000000   0.000000   )
 ( -0.003032   0.000000    -0.001250   0.000000     0.062723   0.000000   )
 ( -0.000000   0.000000    -0.000000   0.000000     0.000000   0.000000   )
 (  0.000000   0.000000     0.000000   0.000000     0.000000   0.000000   )
 ( -0.000000   0.000000     0.000000   0.000000     0.000000   0.000000   )
 (  0.000000   0.000000     0.000000   0.000000     0.000000   0.000000   )
 ( -0.000000   0.000000    -0.000000   0.000000     0.000000   0.000000   )
 (  0.000000   0.000000     0.000000   0.000000    -0.000000   0.000000   )
 (  0.000000   0.000000     0.000000   0.000000    -0.000000   0.000000   )
 ( -0.000000   0.000000    -0.000000   0.000000    -0.000000   0.000000   )
 (  0.000000   0.000000    -0.000000   0.000000    -0.000000   0.000000   )
 ( -0.000000   0.000000     0.000000   0.000000     0.000000   0.000000   )
 (  0.000000   0.000000     0.000000   0.000000     0.000000   0.000000   )
 (  0.000000   0.000000    -0.000000   0.000000     0.000000   0.000000   )
 (  0.000000   0.000000     0.000000   0.000000    -0.000000   0.000000   )
 ( -0.000000   0.000000     0.000000   0.000000    -0.000000   0.000000   )
 ( -0.000000   0.000000    -0.000000   0.000000    -0.000000   0.000000   )
 (  0.000007   0.000000     0.000003   0.000000    -0.000190   0.000000   )
 (  0.000007   0.000000    -0.000007   0.000000    -0.000365   0.000000   )
 ( -0.000003   0.000000    -0.000004   0.000000    -0.000234   0.000000   )
 ( -0.000000   0.000000    -0.000000   0.000000    -0.000000   0.000000   )
 (  0.000000   0.000000     0.000000   0.000000    -0.000000   0.000000   )
 ( -0.000000   0.000000    -0.000000   0.000000    -0.000000   0.000000   )
 (  0.000000   0.000000    -0.000000   0.000000    -0.000000   0.000000   )
 (  0.000000   0.000000     0.000000   0.000000    -0.000000   0.000000   )
 ( -0.000000   0.000000     0.000000   0.000000    -0.000000   0.000000   )
 ( -0.000000   0.000000    -0.000000   0.000000     0.000000   0.000000   )
 (  0.000000   0.000000     0.000000   0.000000     0.000000   0.000000   )
 ( -0.000000   0.000000     0.000000   0.000000     0.000000   0.000000   )
 ( -0.000000   0.000000     0.000000   0.000000    -0.000000   0.000000   )
 (  0.000000   0.000000     0.000000   0.000000    -0.000000   0.000000   )
 (  0.000000   0.000000    -0.000000   0.000000    -0.000000   0.000000   )
 ( -0.000000   0.000000    -0.000000   0.000000     0.000000   0.000000   )
 (  0.000000   0.000000    -0.000000   0.000000     0.000000   0.000000   )
 (  0.000000   0.000000     0.000000   0.000000     0.000000   0.000000   )
 ( -0.000000   0.000000    -0.000000   0.000000     0.000000   0.000000   )
 (  0.000000   0.000000    -0.000000   0.000000     0.000000   0.000000   )
 ( -0.000000   0.000000     0.000000   0.000000     0.000000   0.000000   )
 (  0.000000   0.000000     0.000000   0.000000    -0.000000   0.000000   )
 ( -0.000000   0.000000     0.000000   0.000000    -0.000000   0.000000   )
 (  0.000000   0.000000    -0.000000   0.000000     0.000000   0.000000   )
 ( -0.000000   0.000000    -0.000000   0.000000    -0.000000   0.000000   )
 ( -0.000000   0.000000     0.000000   0.000000    -0.000000   0.000000   )
 (  0.000000   0.000000    -0.000000   0.000000     0.000000   0.000000   )
 (  0.000000   0.000000    -0.000000   0.000000    -0.000000   0.000000   )
 (  0.000000   0.000000     0.000000   0.000000    -0.000000   0.000000   )
 ( -0.000000   0.000000     0.000000   0.000000    -0.000000   0.000000   )
 (  0.000000   0.000000     0.000000   0.000000    -0.000000   0.000000   )
 (  0.000000   0.000000    -0.000000   0.000000    -0.000000   0.000000   )
 ( -0.000000   0.000000     0.000000   0.000000    -0.000000   0.000000   )
 (  0.000000   0.000000     0.000000   0.000000     0.000000   0.000000   )
 ( -0.000000   0.000000    -0.000000   0.000000     0.000000   0.000000   )
 (  0.000000   0.000000    -0.000000   0.000000     0.000000   0.000000   )
 ( -0.000000   0.000000    -0.000000   0.000000     0.000000   0.000000   )
 ( -0.000000   0.000000     0.000000   0.000000     0.000000   0.000000   )
 (  0.000000   0.000000    -0.000000   0.000000     0.000000   0.000000   )
 (  0.000000   0.000000    -0.000000   0.000000    -0.000000   0.000000   )
 (  0.000000   0.000000     0.000000   0.000000    -0.000000   0.000000   )
 ( -0.000000   0.000000    -0.000000   0.000000    -0.000000   0.000000   )
 (  0.000000   0.000000    -0.000000   0.000000    -0.000000   0.000000   )
 ( -0.000000   0.000000    -0.000000   0.000000    -0.000000   0.000000   )
 ( -0.000000   0.000000     0.000000   0.000000    -0.000000   0.000000   )
 ( -0.000000   0.000000    -0.000000   0.000000     0.000000   0.000000   )
 (  0.000000   0.000000    -0.000000   0.000000     0.000000   0.000000   )
 (  0.000000   0.000000     0.000000   0.000000     0.000000   0.000000   )
 ( -0.000000   0.000000     0.000000   0.000000     0.000000   0.000000   )
 (  0.000000   0.000000    -0.000000   0.000000     0.000000   0.000000   )
 ( -0.000000   0.000000    -0.000000   0.000000     0.000000   0.000000   )
 ( -0.000000   0.000000    -0.000000   0.000000     0.000000   0.000000   )
 (  0.000000   0.000000    -0.000000   0.000000     0.000000   0.000000   )
 ( -0.000000   0.000000     0.000000   0.000000     0.000000   0.000000   )
 (  0.000000   0.000000     0.000000   0.000000     0.000000   0.000000   )
 (  0.000000   0.000000    -0.000000   0.000000     0.000000   0.000000   )
 ( -0.000000   0.000000    -0.000000   0.000000     0.000000   0.000000   )
 ( -0.000000   0.000000    -0.000000   0.000000     0.000000   0.000000   )
 (  0.000000   0.000000     0.000000   0.000000     0.000000   0.000000   )
 ( -0.000000   0.000000     0.000000   0.000000     0.000000   0.000000   )
 (  0.000000   0.000000     0.000000   0.000000     0.000000   0.000000   )
 ( -0.000000   0.000000    -0.000000   0.000000     0.000000   0.000000   )
 ( -0.000000   0.000000     0.000000   0.000000     0.000000   0.000000   )
 (  0.000000   0.000000     0.000000   0.000000     0.000000   0.000000   )
 ( -0.000000   0.000000     0.000000   0.000000     0.000000   0.000000   )
 ( -0.000000   0.000000    -0.000000   0.000000     0.000000   0.000000   )
 (  0.000000   0.000000    -0.000000   0.000000     0.000000   0.000000   )
 ( -0.000000   0.000000    -0.000000   0.000000     0.000000   0.000000   )
 (  0.000000   0.000000     0.000000   0.000000     0.000000   0.000000   )
 (  0.000000   0.000000     0.000000   0.000000    -0.000000   0.000000   )
 ( -0.000000   0.000000    -0.000000   0.000000    -0.000000   0.000000   )
 (  0.000000   0.000000    -0.000000   0.000000    -0.000000   0.000000   )
 ( -0.000000   0.000000    -0.000000   0.000000    -0.000000   0.000000   )
 ( -0.000000   0.000000     0.000000   0.000000    -0.000000   0.000000   )
 (  0.000000   0.000000    -0.000000   0.000000    -0.000000   0.000000   )
 ( -0.000000   0.000000    -0.000000   0.000000     0.000000   0.000000   )
 ( -0.000000   0.000000    -0.000000   0.000000    -0.000000   0.000000   )
 (  0.051894   0.000000     0.017976   0.000000    -0.996486   0.000000   )
 (  0.000000   0.000000    -0.000000   0.000000     0.000000   0.000000   )
 ( -0.000000   0.000000    -0.000000   0.000000     0.000000   0.000000   )
 ( -0.000000   0.000000     0.000000   0.000000     0.000000   0.000000   )
 ( -0.000000   0.000000    -0.000000   0.000000    -0.000000   0.000000   )
 (  0.000000   0.000000    -0.000000   0.000000    -0.000000   0.000000   )
 (  0.000000   0.000000     0.000000   0.000000    -0.000000   0.000000   )
 (  0.000151   0.000000     0.000070   0.000000     0.002924   0.000000   )
 ( -0.000536   0.000000     0.000374   0.000000     0.005684   0.000000   )
 (  0.000029   0.000000    -0.000228   0.000000     0.003671   0.000000   )
 **************************************************************************
