# Supplementary material for: Theoretical OH stretching vibrations in dravite
Source: Copernicus journal article supplement (doi:10.5194/ejm-34-239-2022), 2022-04-13
Supplement: Supplementary file 3 [file ejm-34-239-2022-supplement.zip › ejm-2021-65-supplement-version2/supplementary_files/Structure_and_eigendisplacement_files/chemically_disordered_models_simple_hexagonal_cell/dravite_vacancy.cif]

#======================================================================

# CRYSTAL DATA

#----------------------------------------------------------------------

data_VESTA_phase_1


_pd_phase_name                         
_cell_length_a 16.1067867
_cell_length_b 16.1067867
_cell_length_c 7.27903080
_cell_angle_alpha                      90
_cell_angle_beta                       90
_cell_angle_gamma                      120
_symmetry_space_group_name_H-M         'P1'
_symmetry_Int_Tables_number            1

loop_
_symmetry_equiv_pos_as_xyz
   'x, y, z'

loop_
   _atom_site_label
   _atom_site_fract_x
   _atom_site_fract_y
   _atom_site_fract_z
Na       0.000001821   0.000000025   0.275925422
Na       0.666666893   0.333333168   0.608533803
Mg       0.126826057   0.063412778   0.645770490
Mg       0.936587618   0.063412821   0.645767861
Mg       0.936587653   0.873174366   0.645769083
Mg       0.793390532   0.396694882   0.978339321
Mg       0.603305977   0.396694831   0.978340381
Mg       0.603305965   0.206610355   0.978340092
Mg       0.457653647   0.728826492   0.310908910
Mg       0.271174038   0.728826613   0.310909124
Mg       0.271174102   0.542346889   0.310908923
Al       0.298635075   0.262456910   0.632911184
Al       0.737543552   0.036177417   0.632910731
Al       0.963823185   0.701365650   0.632911097
Al       0.737543611   0.701365494   0.632910833
Al       0.963823207   0.262457006   0.632910817
Al       0.298634984   0.036177486   0.632911361
Al       0.965482189   0.595182329   0.966021984
Al       0.404818448   0.370299198   0.966022132
Al       0.629701369   0.034518505   0.966021752
Al       0.404818391   0.034518550   0.966022204
Al       0.629701395   0.595182187   0.966021876
Al       0.965482193   0.370299244   0.966021788
Al       0.630964890   0.927432518   0.298792486
Al       0.072568045   0.703531888   0.298792771
Al       0.296468903   0.369035591   0.298792892
Al       0.072568123   0.369035637   0.298792516
Al       0.296468809   0.927432684   0.298792997
Al       0.630964905   0.703531680   0.298792637
Si       0.192615319   0.190761244   0.016347267
Si       0.809239250   0.001853379   0.016346438
Si       0.998147320   0.807385404   0.016347038
Si       0.809239321   0.807385218   0.016346740
Si       0.998147313   0.190761317   0.016346549
Si       0.192615258   0.001853343   0.016347455
Si       0.859303983   0.524170025   0.349144199
Si       0.475830675   0.335133246   0.349144522
Si       0.664867425   0.140696755   0.349144194
Si       0.475830687   0.140696717   0.349144538
Si       0.664867438   0.524169967   0.349144300
Si       0.859303988   0.335133247   0.349144078
Si       0.525745870   0.856866467   0.683941811
Si       0.143134106   0.668878871   0.683942016
Si       0.331121756   0.474254620   0.683942106
Si       0.143134150   0.474254682   0.683941829
Si       0.331121734   0.856866497   0.683942168
Si       0.525745934   0.668878785   0.683941936
B        0.110009813   0.220018254   0.473277673
B        0.779982283   0.889990812   0.473277111
B        0.110009750   0.889990963   0.473278142
B        0.776759886   0.553518501   0.806888760
B        0.446482153   0.223240765   0.806889208
B        0.776759894   0.223240755   0.806888516
B        0.443841830   0.887682545   0.144185183
B        0.112318139   0.556158802   0.144185141
B        0.443841898   0.556158681   0.144185113
O        0.000000096  -0.000000014   0.793382485
O        0.666667845   0.333333430   0.125593007
O        0.333333911   0.666666659   0.468472915
O        0.061735226   0.123469071   0.497668494
O        0.876531458   0.938265399   0.497667393
O        0.061735185   0.938265536   0.497669409
O        0.728467607   0.456933946   0.829951878
O        0.543066672   0.271533018   0.829952513
O        0.728467622   0.271533010   0.829951590
O        0.396732993   0.793464886   0.174856007
O        0.206535747   0.603267611   0.174856105
O        0.396733069   0.603267507   0.174855760
O        0.270473855   0.135236585   0.533068827
O        0.864763827   0.135236816   0.533068015
O        0.864763957   0.729526585   0.533068341
O        0.936512379   0.468255841   0.866071715
O        0.531744882   0.468255806   0.866072084
O        0.531744883   0.063488381   0.866071962
O        0.603828861   0.801914064   0.197020825
O        0.198086357   0.801914388   0.197021123
O        0.198086516   0.396171554   0.197020942
O        0.091911492   0.183821715   0.085680508
O        0.816178934   0.908089140   0.085679737
O        0.091911560   0.908089056   0.085681529
O        0.758490830   0.516980214   0.419173629
O        0.483020298   0.241509791   0.419174032
O        0.758490813   0.241509916   0.419173719
O        0.427554954   0.855108745   0.750170946
O        0.144891733   0.572445569   0.750170864
O        0.427554939   0.572445628   0.750171149
O        0.185661906   0.092830621   0.107350872
O        0.907170023   0.092830579   0.107349701
O        0.907170011   0.814338757   0.107350204
O        0.853040030   0.426519643   0.439848941
O        0.573481065   0.426519646   0.439849484
O        0.573481087   0.146960720   0.439849310
O        0.523693936   0.761846659   0.774901048
O        0.238153991   0.761846574   0.774901408
O        0.238153953   0.476306723   0.774901177
O        0.198779593   0.189482899   0.795001320
O        0.810517664   0.009295882   0.795000429
O        0.990704976   0.801221358   0.795001036
O        0.810517747   0.801221034   0.795000763
O        0.990704892   0.189482963   0.795000541
O        0.198779417   0.009295780   0.795001481
O        0.864804071   0.522895681   0.127738112
O        0.477105062   0.341907595   0.127738383
O        0.658093321   0.135196774   0.127738051
O        0.477105146   0.135196695   0.127738434
O        0.658093251   0.522895759   0.127738149
O        0.864804019   0.341907465   0.127737964
O        0.533610374   0.856298913   0.462577264
O        0.143701673   0.677311036   0.462577496
O        0.322689736   0.466390103   0.462577551
O        0.143701745   0.466390156   0.462577297
O        0.322689592   0.856298979   0.462577641
O        0.533610403   0.677310764   0.462577372
O        0.284867921   0.285649297   0.100922201
O        0.714351199  -0.000782193   0.100921597
O        1.000782699   0.715132748   0.100921997
O        0.714351238   0.715132706   0.100921817
O        1.000782821   0.285649381   0.100921670
O        0.284867927  -0.000781979   0.100922308
O        0.951184794   0.619515402   0.433713400
O        0.380485351   0.331668818   0.433713572
O        0.668331750   0.048815775   0.433713160
O        0.380485297   0.048815876   0.433713686
O        0.668331777   0.619515275   0.433713299
O        0.951184863   0.331668815   0.433713148
O        0.618698418   0.953376283   0.767099645
O        0.046624364   0.665321672   0.767099937
O        0.334679020   0.381302090   0.767100119
O        0.046624353   0.381302120   0.767099677
O        0.334678967   0.953376264   0.767100224
O        0.618698459   0.665321522   0.767099800
O        0.210177869   0.270716876   0.461646629
O        0.729283595   0.939460195   0.461646121
O        0.060540303   0.789822910   0.461646497
O        0.729283598   0.789822710   0.461646294
O        0.060540411   0.270716901   0.461646218
O        0.210177779   0.939460409   0.461646734
O        0.876923060   0.604536176   0.796034001
O        0.395464543   0.272386310   0.796034139
O        0.727614322   0.123077559   0.796033685
O        0.395464479   0.123077578   0.796034293
O        0.727614321   0.604536102   0.796033805
O        0.876923065   0.272386293   0.796033727
O        0.544713268   0.939625359   0.130336709
O        0.060375368   0.605087459   0.130336835
O        0.394913314   0.455287223   0.130336984
O        0.060375356   0.455287341   0.130336692
O        0.394913223   0.939625369   0.130337034
O        0.544713331   0.605087264   0.130336803
H       -0.000003615  -0.000000086   0.925099778
H        0.666669169   0.333333898   0.257312887
H        0.333334038   0.666666626   0.600968574
H        0.269863568   0.134931391   0.399553398
H        0.865068779   0.134931921   0.399552583
H        0.865069073   0.730136659   0.399552911
H        0.937970886   0.468985115   0.732609205
H        0.531015764   0.468984861   0.732609551
H        0.531015689   0.062030095   0.732609438
H        0.598908342   0.799453774   0.063577783
H        0.200546626   0.799454193   0.063578087
H        0.200546821   0.401092028   0.063577900
