# Supplementary material for: Theoretical OH stretching vibrations in dravite
Source: Copernicus journal article supplement (doi:10.5194/ejm-34-239-2022), 2022-04-13
Supplement: Supplementary file 3 [file ejm-34-239-2022-supplement.zip › ejm-2021-65-supplement-version2/supplementary_files/Structure_and_eigendisplacement_files/chemically_disordered_models_simple_hexagonal_cell/dravite_vacancy.txt]

     freq (  480) =     108.666264 [THz] =    3624.716420 [cm-1]
 ( -0.000000   0.000000    -0.000000   0.000000    -0.000000   0.000000   )
 (  0.000000   0.000000     0.000000   0.000000    -0.000000   0.000000   )
 ( -0.000000   0.000000    -0.000000   0.000000     0.000000   0.000000   )
 ( -0.000000   0.000000    -0.000000   0.000000    -0.000000   0.000000   )
 ( -0.000000   0.000000    -0.000000   0.000000    -0.000000   0.000000   )
 (  0.000000   0.000000     0.000000   0.000000    -0.000000   0.000000   )
 (  0.000000   0.000000     0.000000   0.000000     0.000000   0.000000   )
 (  0.000000   0.000000     0.000000   0.000000     0.000000   0.000000   )
 (  0.000000   0.000000     0.000000   0.000000    -0.000000   0.000000   )
 (  0.000000   0.000000    -0.000000   0.000000     0.000000   0.000000   )
 (  0.000000   0.000000     0.000000   0.000000     0.000000   0.000000   )
 (  0.000000   0.000000     0.000000   0.000000     0.000000   0.000000   )
 (  0.000000   0.000000     0.000000   0.000000    -0.000000   0.000000   )
 (  0.000000   0.000000    -0.000000   0.000000     0.000000   0.000000   )
 (  0.000000   0.000000     0.000000   0.000000    -0.000000   0.000000   )
 ( -0.000000   0.000000     0.000000   0.000000     0.000000   0.000000   )
 (  0.000000   0.000000    -0.000000   0.000000     0.000000   0.000000   )
 (  0.000000   0.000000     0.000000   0.000000    -0.000000   0.000000   )
 ( -0.000000   0.000000     0.000000   0.000000    -0.000000   0.000000   )
 (  0.000000   0.000000     0.000000   0.000000     0.000000   0.000000   )
 (  0.000000   0.000000    -0.000000   0.000000    -0.000000   0.000000   )
 (  0.000000   0.000000    -0.000000   0.000000     0.000000   0.000000   )
 (  0.000000   0.000000     0.000000   0.000000    -0.000000   0.000000   )
 (  0.000000   0.000000    -0.000000   0.000000    -0.000000   0.000000   )
 ( -0.000000   0.000000    -0.000000   0.000000     0.000000   0.000000   )
 (  0.000000   0.000000     0.000000   0.000000     0.000000   0.000000   )
 ( -0.000000   0.000000     0.000000   0.000000     0.000000   0.000000   )
 (  0.000000   0.000000     0.000000   0.000000     0.000000   0.000000   )
 ( -0.000000   0.000000     0.000000   0.000000    -0.000000   0.000000   )
 ( -0.000000   0.000000    -0.000000   0.000000    -0.000000   0.000000   )
 ( -0.000000   0.000000    -0.000000   0.000000     0.000000   0.000000   )
 ( -0.000000   0.000000     0.000000   0.000000    -0.000000   0.000000   )
 ( -0.000000   0.000000    -0.000000   0.000000     0.000000   0.000000   )
 ( -0.000000   0.000000    -0.000000   0.000000    -0.000000   0.000000   )
 ( -0.000000   0.000000     0.000000   0.000000    -0.000000   0.000000   )
 ( -0.000000   0.000000    -0.000000   0.000000     0.000000   0.000000   )
 (  0.000000   0.000000     0.000000   0.000000     0.000000   0.000000   )
 (  0.000000   0.000000    -0.000000   0.000000    -0.000000   0.000000   )
 (  0.000000   0.000000     0.000000   0.000000     0.000000   0.000000   )
 ( -0.000000   0.000000     0.000000   0.000000    -0.000000   0.000000   )
 ( -0.000000   0.000000    -0.000000   0.000000     0.000000   0.000000   )
 ( -0.000000   0.000000     0.000000   0.000000    -0.000000   0.000000   )
 (  0.000000   0.000000     0.000000   0.000000     0.000000   0.000000   )
 ( -0.000000   0.000000    -0.000000   0.000000     0.000000   0.000000   )
 (  0.000000   0.000000     0.000000   0.000000     0.000000   0.000000   )
 ( -0.000000   0.000000    -0.000000   0.000000     0.000000   0.000000   )
 (  0.000000   0.000000    -0.000000   0.000000    -0.000000   0.000000   )
 ( -0.000000   0.000000    -0.000000   0.000000     0.000000   0.000000   )
 ( -0.000000   0.000000    -0.000000   0.000000    -0.000000   0.000000   )
 ( -0.000000   0.000000     0.000000   0.000000     0.000000   0.000000   )
 (  0.000000   0.000000     0.000000   0.000000    -0.000000   0.000000   )
 (  0.000000   0.000000    -0.000000   0.000000     0.000000   0.000000   )
 (  0.000000   0.000000     0.000000   0.000000    -0.000000   0.000000   )
 (  0.000000   0.000000    -0.000000   0.000000     0.000000   0.000000   )
 (  0.000000   0.000000    -0.000000   0.000000    -0.000000   0.000000   )
 (  0.000000   0.000000     0.000000   0.000000     0.000000   0.000000   )
 (  0.000000   0.000000     0.000000   0.000000    -0.000000   0.000000   )
 ( -0.000000   0.000000    -0.000000   0.000000    -0.000000   0.000000   )
 (  0.000040   0.000000     0.000020   0.000000    -0.000000   0.000000   )
 (  0.000000   0.000000     0.000000   0.000000    -0.000000   0.000000   )
 (  0.000000   0.000000     0.000000   0.000000     0.000000   0.000000   )
 (  0.000000   0.000000    -0.000000   0.000000    -0.000000   0.000000   )
 ( -0.000000   0.000000    -0.000000   0.000000    -0.000000   0.000000   )
 ( -0.000000   0.000000    -0.000000   0.000000     0.000000   0.000000   )
 ( -0.000000   0.000000    -0.000000   0.000000    -0.000000   0.000000   )
 ( -0.000000   0.000000     0.000000   0.000000    -0.000000   0.000000   )
 ( -0.000000   0.000000     0.000000   0.000000     0.000000   0.000000   )
 ( -0.000000   0.000000    -0.000000   0.000000    -0.000000   0.000000   )
 ( -0.000000   0.000000    -0.000000   0.000000    -0.000000   0.000000   )
 (  0.000000   0.000000     0.000000   0.000000     0.000000   0.000000   )
 (  0.000000   0.000000    -0.000000   0.000000     0.000000   0.000000   )
 ( -0.000000   0.000000    -0.000000   0.000000     0.000000   0.000000   )
 (  0.000000   0.000000     0.000000   0.000000    -0.000000   0.000000   )
 (  0.000000   0.000000    -0.000000   0.000000    -0.000000   0.000000   )
 ( -0.002958   0.000000    -0.001708   0.000000    -0.050846   0.000000   )
 ( -0.001631   0.000000     0.000940   0.000000     0.028023   0.000000   )
 ( -0.000001   0.000000    -0.001517   0.000000     0.022586   0.000000   )
 (  0.000000   0.000000     0.000000   0.000000     0.000000   0.000000   )
 (  0.000000   0.000000     0.000000   0.000000    -0.000000   0.000000   )
 (  0.000000   0.000000    -0.000000   0.000000     0.000000   0.000000   )
 (  0.000000   0.000000    -0.000000   0.000000     0.000000   0.000000   )
 ( -0.000000   0.000000    -0.000000   0.000000    -0.000000   0.000000   )
 (  0.000000   0.000000     0.000000   0.000000     0.000000   0.000000   )
 (  0.000000   0.000000    -0.000000   0.000000     0.000000   0.000000   )
 ( -0.000000   0.000000    -0.000000   0.000000    -0.000000   0.000000   )
 (  0.000000   0.000000     0.000000   0.000000     0.000000   0.000000   )
 (  0.000000   0.000000    -0.000000   0.000000     0.000000   0.000000   )
 (  0.000000   0.000000     0.000000   0.000000    -0.000000   0.000000   )
 (  0.000000   0.000000     0.000000   0.000000    -0.000000   0.000000   )
 (  0.000000   0.000000     0.000000   0.000000    -0.000000   0.000000   )
 ( -0.000000   0.000000    -0.000000   0.000000     0.000000   0.000000   )
 ( -0.000000   0.000000     0.000000   0.000000     0.000000   0.000000   )
 (  0.000000   0.000000     0.000000   0.000000     0.000000   0.000000   )
 (  0.000000   0.000000    -0.000000   0.000000    -0.000000   0.000000   )
 (  0.000000   0.000000     0.000000   0.000000    -0.000000   0.000000   )
 (  0.000000   0.000000    -0.000000   0.000000     0.000000   0.000000   )
 ( -0.000000   0.000000    -0.000000   0.000000    -0.000000   0.000000   )
 ( -0.000000   0.000000     0.000000   0.000000     0.000000   0.000000   )
 ( -0.000000   0.000000    -0.000000   0.000000    -0.000000   0.000000   )
 (  0.000000   0.000000    -0.000000   0.000000     0.000000   0.000000   )
 ( -0.000000   0.000000     0.000000   0.000000     0.000000   0.000000   )
 (  0.000000   0.000000     0.000000   0.000000    -0.000000   0.000000   )
 ( -0.000000   0.000000    -0.000000   0.000000    -0.000000   0.000000   )
 ( -0.000000   0.000000     0.000000   0.000000     0.000000   0.000000   )
 ( -0.000000   0.000000    -0.000000   0.000000    -0.000000   0.000000   )
 (  0.000000   0.000000    -0.000000   0.000000     0.000000   0.000000   )
 (  0.000000   0.000000     0.000000   0.000000     0.000000   0.000000   )
 ( -0.000000   0.000000    -0.000000   0.000000     0.000000   0.000000   )
 ( -0.000000   0.000000     0.000000   0.000000    -0.000000   0.000000   )
 (  0.000000   0.000000    -0.000000   0.000000    -0.000000   0.000000   )
 ( -0.000000   0.000000    -0.000000   0.000000    -0.000000   0.000000   )
 ( -0.000000   0.000000     0.000000   0.000000    -0.000000   0.000000   )
 ( -0.000000   0.000000    -0.000000   0.000000     0.000000   0.000000   )
 ( -0.000000   0.000000     0.000000   0.000000     0.000000   0.000000   )
 (  0.000000   0.000000     0.000000   0.000000    -0.000000   0.000000   )
 (  0.000000   0.000000     0.000000   0.000000     0.000000   0.000000   )
 (  0.000000   0.000000    -0.000000   0.000000    -0.000000   0.000000   )
 (  0.000000   0.000000     0.000000   0.000000     0.000000   0.000000   )
 (  0.000000   0.000000    -0.000000   0.000000     0.000000   0.000000   )
 (  0.000000   0.000000     0.000000   0.000000    -0.000000   0.000000   )
 ( -0.000000   0.000000    -0.000000   0.000000    -0.000000   0.000000   )
 ( -0.000000   0.000000     0.000000   0.000000     0.000000   0.000000   )
 ( -0.000000   0.000000    -0.000000   0.000000    -0.000000   0.000000   )
 (  0.000000   0.000000    -0.000000   0.000000     0.000000   0.000000   )
 (  0.000000   0.000000    -0.000000   0.000000    -0.000000   0.000000   )
 (  0.000000   0.000000    -0.000000   0.000000     0.000000   0.000000   )
 ( -0.000000   0.000000    -0.000000   0.000000    -0.000000   0.000000   )
 (  0.000000   0.000000    -0.000000   0.000000    -0.000000   0.000000   )
 ( -0.000000   0.000000    -0.000000   0.000000    -0.000000   0.000000   )
 (  0.000000   0.000000     0.000000   0.000000    -0.000000   0.000000   )
 ( -0.000000   0.000000     0.000000   0.000000     0.000000   0.000000   )
 ( -0.000000   0.000000     0.000000   0.000000    -0.000000   0.000000   )
 (  0.000000   0.000000     0.000000   0.000000     0.000000   0.000000   )
 (  0.000000   0.000000     0.000000   0.000000    -0.000000   0.000000   )
 (  0.000000   0.000000    -0.000000   0.000000     0.000000   0.000000   )
 (  0.000000   0.000000     0.000000   0.000000    -0.000000   0.000000   )
 (  0.000000   0.000000    -0.000000   0.000000    -0.000000   0.000000   )
 ( -0.000000   0.000000    -0.000000   0.000000     0.000000   0.000000   )
 (  0.000000   0.000000    -0.000000   0.000000     0.000000   0.000000   )
 ( -0.000000   0.000000    -0.000000   0.000000    -0.000000   0.000000   )
 ( -0.000000   0.000000     0.000000   0.000000     0.000000   0.000000   )
 ( -0.000000   0.000000     0.000000   0.000000    -0.000000   0.000000   )
 ( -0.000000   0.000000    -0.000000   0.000000     0.000000   0.000000   )
 ( -0.000000   0.000000     0.000000   0.000000    -0.000000   0.000000   )
 (  0.000000   0.000000     0.000000   0.000000     0.000000   0.000000   )
 ( -0.000000   0.000000    -0.000000   0.000000     0.000000   0.000000   )
 (  0.000000   0.000000    -0.000000   0.000000     0.000000   0.000000   )
 ( -0.000000   0.000000    -0.000000   0.000000     0.000000   0.000000   )
 ( -0.000000   0.000000    -0.000000   0.000000    -0.000000   0.000000   )
 ( -0.000000   0.000000    -0.000000   0.000000     0.000000   0.000000   )
 (  0.000000   0.000000     0.000000   0.000000    -0.000000   0.000000   )
 ( -0.000927   0.000000    -0.000461   0.000000     0.000010   0.000000   )
 (  0.000000   0.000000     0.000000   0.000000     0.000000   0.000000   )
 ( -0.000000   0.000000    -0.000000   0.000000    -0.000000   0.000000   )
 ( -0.000000   0.000000     0.000000   0.000000    -0.000000   0.000000   )
 (  0.000000   0.000000     0.000000   0.000000     0.000000   0.000000   )
 (  0.000000   0.000000    -0.000000   0.000000    -0.000000   0.000000   )
 ( -0.000000   0.000000     0.000000   0.000000    -0.000000   0.000000   )
 (  0.041072   0.000000     0.023709   0.000000     0.813227   0.000000   )
 (  0.022645   0.000000    -0.013050   0.000000    -0.448205   0.000000   )
 (  0.000012   0.000000     0.021067   0.000000    -0.361246   0.000000   )
     freq (  481) =     108.666299 [THz] =    3624.717568 [cm-1]
 ( -0.000000   0.000000     0.000000   0.000000     0.000000   0.000000   )
 (  0.000000   0.000000    -0.000000   0.000000     0.000000   0.000000   )
 ( -0.000000   0.000000     0.000000   0.000000    -0.000000   0.000000   )
 (  0.000000   0.000000     0.000000   0.000000    -0.000000   0.000000   )
 ( -0.000000   0.000000     0.000000   0.000000     0.000000   0.000000   )
 (  0.000000   0.000000    -0.000000   0.000000     0.000000   0.000000   )
 (  0.000000   0.000000    -0.000000   0.000000     0.000000   0.000000   )
 (  0.000000   0.000000    -0.000000   0.000000    -0.000000   0.000000   )
 ( -0.000000   0.000000    -0.000000   0.000000     0.000000   0.000000   )
 (  0.000000   0.000000    -0.000000   0.000000     0.000000   0.000000   )
 (  0.000000   0.000000    -0.000000   0.000000    -0.000000   0.000000   )
 ( -0.000000   0.000000    -0.000000   0.000000    -0.000000   0.000000   )
 ( -0.000000   0.000000    -0.000000   0.000000     0.000000   0.000000   )
 (  0.000000   0.000000    -0.000000   0.000000     0.000000   0.000000   )
 ( -0.000000   0.000000    -0.000000   0.000000     0.000000   0.000000   )
 (  0.000000   0.000000    -0.000000   0.000000    -0.000000   0.000000   )
 (  0.000000   0.000000    -0.000000   0.000000     0.000000   0.000000   )
 (  0.000000   0.000000     0.000000   0.000000    -0.000000   0.000000   )
 (  0.000000   0.000000    -0.000000   0.000000     0.000000   0.000000   )
 (  0.000000   0.000000     0.000000   0.000000    -0.000000   0.000000   )
 (  0.000000   0.000000    -0.000000   0.000000    -0.000000   0.000000   )
 ( -0.000000   0.000000     0.000000   0.000000     0.000000   0.000000   )
 ( -0.000000   0.000000    -0.000000   0.000000     0.000000   0.000000   )
 ( -0.000000   0.000000     0.000000   0.000000     0.000000   0.000000   )
 ( -0.000000   0.000000    -0.000000   0.000000     0.000000   0.000000   )
 ( -0.000000   0.000000    -0.000000   0.000000    -0.000000   0.000000   )
 (  0.000000   0.000000    -0.000000   0.000000    -0.000000   0.000000   )
 (  0.000000   0.000000     0.000000   0.000000     0.000000   0.000000   )
 (  0.000000   0.000000    -0.000000   0.000000     0.000000   0.000000   )
 ( -0.000000   0.000000     0.000000   0.000000     0.000000   0.000000   )
 (  0.000000   0.000000     0.000000   0.000000    -0.000000   0.000000   )
 ( -0.000000   0.000000     0.000000   0.000000    -0.000000   0.000000   )
 ( -0.000000   0.000000     0.000000   0.000000    -0.000000   0.000000   )
 (  0.000000   0.000000     0.000000   0.000000     0.000000   0.000000   )
 ( -0.000000   0.000000     0.000000   0.000000    -0.000000   0.000000   )
 ( -0.000000   0.000000    -0.000000   0.000000     0.000000   0.000000   )
 ( -0.000000   0.000000     0.000000   0.000000    -0.000000   0.000000   )
 (  0.000000   0.000000     0.000000   0.000000     0.000000   0.000000   )
 (  0.000000   0.000000     0.000000   0.000000     0.000000   0.000000   )
 ( -0.000000   0.000000    -0.000000   0.000000    -0.000000   0.000000   )
 (  0.000000   0.000000    -0.000000   0.000000    -0.000000   0.000000   )
 ( -0.000000   0.000000    -0.000000   0.000000     0.000000   0.000000   )
 (  0.000000   0.000000     0.000000   0.000000     0.000000   0.000000   )
 (  0.000000   0.000000     0.000000   0.000000    -0.000000   0.000000   )
 ( -0.000000   0.000000     0.000000   0.000000    -0.000000   0.000000   )
 ( -0.000000   0.000000    -0.000000   0.000000     0.000000   0.000000   )
 (  0.000000   0.000000     0.000000   0.000000     0.000000   0.000000   )
 ( -0.000000   0.000000     0.000000   0.000000    -0.000000   0.000000   )
 ( -0.000000   0.000000     0.000000   0.000000     0.000000   0.000000   )
 ( -0.000000   0.000000     0.000000   0.000000     0.000000   0.000000   )
 (  0.000000   0.000000    -0.000000   0.000000     0.000000   0.000000   )
 (  0.000000   0.000000    -0.000000   0.000000    -0.000000   0.000000   )
 ( -0.000000   0.000000    -0.000000   0.000000    -0.000000   0.000000   )
 (  0.000000   0.000000     0.000000   0.000000    -0.000000   0.000000   )
 (  0.000000   0.000000    -0.000000   0.000000     0.000000   0.000000   )
 ( -0.000000   0.000000    -0.000000   0.000000     0.000000   0.000000   )
 (  0.000000   0.000000    -0.000000   0.000000     0.000000   0.000000   )
 ( -0.000000   0.000000     0.000000   0.000000     0.000000   0.000000   )
 (  0.000020   0.000000    -0.000040   0.000000     0.000000   0.000000   )
 (  0.000000   0.000000    -0.000000   0.000000     0.000000   0.000000   )
 (  0.000000   0.000000    -0.000000   0.000000    -0.000000   0.000000   )
 (  0.000000   0.000000    -0.000000   0.000000    -0.000000   0.000000   )
 ( -0.000000   0.000000     0.000000   0.000000     0.000000   0.000000   )
 ( -0.000000   0.000000     0.000000   0.000000    -0.000000   0.000000   )
 ( -0.000000   0.000000     0.000000   0.000000    -0.000000   0.000000   )
 ( -0.000000   0.000000    -0.000000   0.000000     0.000000   0.000000   )
 ( -0.000000   0.000000     0.000000   0.000000    -0.000000   0.000000   )
 (  0.000000   0.000000     0.000000   0.000000    -0.000000   0.000000   )
 (  0.000000   0.000000    -0.000000   0.000000     0.000000   0.000000   )
 ( -0.000000   0.000000    -0.000000   0.000000     0.000000   0.000000   )
 (  0.000000   0.000000     0.000000   0.000000    -0.000000   0.000000   )
 (  0.000000   0.000000    -0.000000   0.000000    -0.000000   0.000000   )
 ( -0.000000   0.000000    -0.000000   0.000000    -0.000000   0.000000   )
 (  0.000000   0.000000     0.000000   0.000000     0.000000   0.000000   )
 (  0.000182   0.000000     0.000107   0.000000     0.003151   0.000000   )
 ( -0.002466   0.000000     0.001425   0.000000     0.042409   0.000000   )
 ( -0.000001   0.000000     0.003058   0.000000    -0.045523   0.000000   )
 (  0.000000   0.000000    -0.000000   0.000000    -0.000000   0.000000   )
 (  0.000000   0.000000    -0.000000   0.000000     0.000000   0.000000   )
 (  0.000000   0.000000    -0.000000   0.000000     0.000000   0.000000   )
 (  0.000000   0.000000     0.000000   0.000000    -0.000000   0.000000   )
 (  0.000000   0.000000    -0.000000   0.000000     0.000000   0.000000   )
 ( -0.000000   0.000000    -0.000000   0.000000     0.000000   0.000000   )
 (  0.000000   0.000000     0.000000   0.000000    -0.000000   0.000000   )
 (  0.000000   0.000000    -0.000000   0.000000     0.000000   0.000000   )
 ( -0.000000   0.000000    -0.000000   0.000000     0.000000   0.000000   )
 (  0.000000   0.000000    -0.000000   0.000000    -0.000000   0.000000   )
 ( -0.000000   0.000000    -0.000000   0.000000    -0.000000   0.000000   )
 (  0.000000   0.000000    -0.000000   0.000000     0.000000   0.000000   )
 ( -0.000000   0.000000     0.000000   0.000000     0.000000   0.000000   )
 (  0.000000   0.000000     0.000000   0.000000     0.000000   0.000000   )
 ( -0.000000   0.000000    -0.000000   0.000000    -0.000000   0.000000   )
 (  0.000000   0.000000    -0.000000   0.000000    -0.000000   0.000000   )
 (  0.000000   0.000000    -0.000000   0.000000    -0.000000   0.000000   )
 (  0.000000   0.000000    -0.000000   0.000000     0.000000   0.000000   )
 ( -0.000000   0.000000     0.000000   0.000000    -0.000000   0.000000   )
 (  0.000000   0.000000    -0.000000   0.000000    -0.000000   0.000000   )
 ( -0.000000   0.000000     0.000000   0.000000     0.000000   0.000000   )
 (  0.000000   0.000000    -0.000000   0.000000     0.000000   0.000000   )
 (  0.000000   0.000000     0.000000   0.000000    -0.000000   0.000000   )
 ( -0.000000   0.000000     0.000000   0.000000     0.000000   0.000000   )
 (  0.000000   0.000000     0.000000   0.000000    -0.000000   0.000000   )
 (  0.000000   0.000000    -0.000000   0.000000     0.000000   0.000000   )
 ( -0.000000   0.000000    -0.000000   0.000000     0.000000   0.000000   )
 ( -0.000000   0.000000    -0.000000   0.000000    -0.000000   0.000000   )
 (  0.000000   0.000000     0.000000   0.000000    -0.000000   0.000000   )
 ( -0.000000   0.000000     0.000000   0.000000     0.000000   0.000000   )
 (  0.000000   0.000000     0.000000   0.000000    -0.000000   0.000000   )
 ( -0.000000   0.000000     0.000000   0.000000    -0.000000   0.000000   )
 ( -0.000000   0.000000     0.000000   0.000000     0.000000   0.000000   )
 (  0.000000   0.000000     0.000000   0.000000     0.000000   0.000000   )
 ( -0.000000   0.000000     0.000000   0.000000    -0.000000   0.000000   )
 (  0.000000   0.000000    -0.000000   0.000000    -0.000000   0.000000   )
 (  0.000000   0.000000    -0.000000   0.000000    -0.000000   0.000000   )
 ( -0.000000   0.000000    -0.000000   0.000000     0.000000   0.000000   )
 (  0.000000   0.000000     0.000000   0.000000     0.000000   0.000000   )
 ( -0.000000   0.000000     0.000000   0.000000     0.000000   0.000000   )
 ( -0.000000   0.000000    -0.000000   0.000000    -0.000000   0.000000   )
 (  0.000000   0.000000    -0.000000   0.000000     0.000000   0.000000   )
 ( -0.000000   0.000000     0.000000   0.000000    -0.000000   0.000000   )
 (  0.000000   0.000000     0.000000   0.000000     0.000000   0.000000   )
 ( -0.000000   0.000000    -0.000000   0.000000    -0.000000   0.000000   )
 ( -0.000000   0.000000    -0.000000   0.000000    -0.000000   0.000000   )
 (  0.000000   0.000000     0.000000   0.000000     0.000000   0.000000   )
 ( -0.000000   0.000000     0.000000   0.000000     0.000000   0.000000   )
 (  0.000000   0.000000     0.000000   0.000000    -0.000000   0.000000   )
 ( -0.000000   0.000000    -0.000000   0.000000    -0.000000   0.000000   )
 ( -0.000000   0.000000     0.000000   0.000000     0.000000   0.000000   )
 (  0.000000   0.000000     0.000000   0.000000     0.000000   0.000000   )
 (  0.000000   0.000000     0.000000   0.000000    -0.000000   0.000000   )
 ( -0.000000   0.000000    -0.000000   0.000000    -0.000000   0.000000   )
 (  0.000000   0.000000    -0.000000   0.000000     0.000000   0.000000   )
 (  0.000000   0.000000    -0.000000   0.000000    -0.000000   0.000000   )
 (  0.000000   0.000000     0.000000   0.000000    -0.000000   0.000000   )
 ( -0.000000   0.000000    -0.000000   0.000000    -0.000000   0.000000   )
 ( -0.000000   0.000000    -0.000000   0.000000     0.000000   0.000000   )
 (  0.000000   0.000000    -0.000000   0.000000    -0.000000   0.000000   )
 ( -0.000000   0.000000    -0.000000   0.000000     0.000000   0.000000   )
 ( -0.000000   0.000000     0.000000   0.000000    -0.000000   0.000000   )
 (  0.000000   0.000000     0.000000   0.000000     0.000000   0.000000   )
 ( -0.000000   0.000000     0.000000   0.000000     0.000000   0.000000   )
 ( -0.000000   0.000000     0.000000   0.000000     0.000000   0.000000   )
 (  0.000000   0.000000     0.000000   0.000000    -0.000000   0.000000   )
 ( -0.000000   0.000000    -0.000000   0.000000     0.000000   0.000000   )
 ( -0.000000   0.000000     0.000000   0.000000     0.000000   0.000000   )
 (  0.000000   0.000000     0.000000   0.000000    -0.000000   0.000000   )
 ( -0.000000   0.000000     0.000000   0.000000    -0.000000   0.000000   )
 ( -0.000000   0.000000    -0.000000   0.000000     0.000000   0.000000   )
 (  0.000000   0.000000     0.000000   0.000000    -0.000000   0.000000   )
 ( -0.000000   0.000000     0.000000   0.000000    -0.000000   0.000000   )
 (  0.000000   0.000000    -0.000000   0.000000    -0.000000   0.000000   )
 ( -0.000461   0.000000     0.000927   0.000000    -0.000002   0.000000   )
 ( -0.000000   0.000000     0.000000   0.000000    -0.000000   0.000000   )
 (  0.000000   0.000000     0.000000   0.000000    -0.000000   0.000000   )
 ( -0.000000   0.000000    -0.000000   0.000000     0.000000   0.000000   )
 ( -0.000000   0.000000     0.000000   0.000000    -0.000000   0.000000   )
 (  0.000000   0.000000     0.000000   0.000000    -0.000000   0.000000   )
 ( -0.000000   0.000000    -0.000000   0.000000     0.000000   0.000000   )
 ( -0.002534   0.000000    -0.001490   0.000000    -0.050403   0.000000   )
 (  0.034249   0.000000    -0.019786   0.000000    -0.678283   0.000000   )
 (  0.000007   0.000000    -0.042460   0.000000     0.728091   0.000000   )
     freq (  482) =     108.677441 [THz] =    3625.089236 [cm-1]
 (  0.000000   0.000000     0.000000   0.000000    -0.000000   0.000000   )
 (  0.000000   0.000000    -0.000000   0.000000    -0.000000   0.000000   )
 ( -0.000000   0.000000    -0.000000   0.000000    -0.000000   0.000000   )
 (  0.000000   0.000000    -0.000000   0.000000    -0.000000   0.000000   )
 (  0.000000   0.000000     0.000000   0.000000    -0.000000   0.000000   )
 ( -0.000000   0.000000    -0.000000   0.000000     0.000000   0.000000   )
 (  0.000000   0.000000    -0.000000   0.000000     0.000000   0.000000   )
 ( -0.000000   0.000000     0.000000   0.000000     0.000000   0.000000   )
 (  0.000000   0.000000     0.000000   0.000000    -0.000000   0.000000   )
 ( -0.000000   0.000000     0.000000   0.000000    -0.000000   0.000000   )
 ( -0.000000   0.000000    -0.000000   0.000000    -0.000000   0.000000   )
 ( -0.000000   0.000000    -0.000000   0.000000    -0.000000   0.000000   )
 (  0.000000   0.000000     0.000000   0.000000    -0.000000   0.000000   )
 ( -0.000000   0.000000     0.000000   0.000000    -0.000000   0.000000   )
 (  0.000000   0.000000     0.000000   0.000000    -0.000000   0.000000   )
 (  0.000000   0.000000    -0.000000   0.000000    -0.000000   0.000000   )
 ( -0.000000   0.000000     0.000000   0.000000    -0.000000   0.000000   )
 ( -0.000000   0.000000    -0.000000   0.000000     0.000000   0.000000   )
 (  0.000000   0.000000    -0.000000   0.000000     0.000000   0.000000   )
 (  0.000000   0.000000     0.000000   0.000000     0.000000   0.000000   )
 ( -0.000000   0.000000     0.000000   0.000000     0.000000   0.000000   )
 (  0.000000   0.000000    -0.000000   0.000000     0.000000   0.000000   )
 ( -0.000000   0.000000    -0.000000   0.000000     0.000000   0.000000   )
 (  0.000000   0.000000    -0.000000   0.000000    -0.000000   0.000000   )
 (  0.000000   0.000000     0.000000   0.000000    -0.000000   0.000000   )
 ( -0.000000   0.000000    -0.000000   0.000000    -0.000000   0.000000   )
 (  0.000000   0.000000    -0.000000   0.000000    -0.000000   0.000000   )
 ( -0.000000   0.000000    -0.000000   0.000000    -0.000000   0.000000   )
 ( -0.000000   0.000000     0.000000   0.000000    -0.000000   0.000000   )
 ( -0.000000   0.000000     0.000000   0.000000     0.000000   0.000000   )
 ( -0.000000   0.000000    -0.000000   0.000000     0.000000   0.000000   )
 (  0.000000   0.000000     0.000000   0.000000     0.000000   0.000000   )
 ( -0.000000   0.000000     0.000000   0.000000     0.000000   0.000000   )
 (  0.000000   0.000000     0.000000   0.000000     0.000000   0.000000   )
 (  0.000000   0.000000    -0.000000   0.000000     0.000000   0.000000   )
 (  0.000000   0.000000     0.000000   0.000000    -0.000000   0.000000   )
 ( -0.000000   0.000000    -0.000000   0.000000    -0.000000   0.000000   )
 (  0.000000   0.000000    -0.000000   0.000000    -0.000000   0.000000   )
 ( -0.000000   0.000000    -0.000000   0.000000    -0.000000   0.000000   )
 ( -0.000000   0.000000     0.000000   0.000000    -0.000000   0.000000   )
 (  0.000000   0.000000    -0.000000   0.000000    -0.000000   0.000000   )
 ( -0.000000   0.000000     0.000000   0.000000    -0.000000   0.000000   )
 ( -0.000000   0.000000    -0.000000   0.000000    -0.000000   0.000000   )
 (  0.000000   0.000000    -0.000000   0.000000    -0.000000   0.000000   )
 ( -0.000000   0.000000    -0.000000   0.000000    -0.000000   0.000000   )
 (  0.000000   0.000000     0.000000   0.000000    -0.000000   0.000000   )
 (  0.000000   0.000000    -0.000000   0.000000    -0.000000   0.000000   )
 (  0.000000   0.000000     0.000000   0.000000    -0.000000   0.000000   )
 ( -0.000000   0.000000    -0.000000   0.000000    -0.000000   0.000000   )
 (  0.000000   0.000000    -0.000000   0.000000    -0.000000   0.000000   )
 ( -0.000000   0.000000    -0.000000   0.000000     0.000000   0.000000   )
 (  0.000000   0.000000     0.000000   0.000000     0.000000   0.000000   )
 ( -0.000000   0.000000     0.000000   0.000000     0.000000   0.000000   )
 ( -0.000000   0.000000     0.000000   0.000000     0.000000   0.000000   )
 ( -0.000000   0.000000    -0.000000   0.000000     0.000000   0.000000   )
 (  0.000000   0.000000    -0.000000   0.000000     0.000000   0.000000   )
 ( -0.000000   0.000000    -0.000000   0.000000    -0.000000   0.000000   )
 (  0.000000   0.000000    -0.000000   0.000000    -0.000000   0.000000   )
 ( -0.000000   0.000000    -0.000000   0.000000    -0.000137   0.000000   )
 ( -0.000000   0.000000    -0.000000   0.000000     0.000000   0.000000   )
 (  0.000000   0.000000     0.000000   0.000000     0.000000   0.000000   )
 ( -0.000000   0.000000     0.000000   0.000000     0.000000   0.000000   )
 (  0.000000   0.000000     0.000000   0.000000    -0.000000   0.000000   )
 ( -0.000000   0.000000    -0.000000   0.000000    -0.000000   0.000000   )
 (  0.000000   0.000000    -0.000000   0.000000    -0.000000   0.000000   )
 (  0.000000   0.000000    -0.000000   0.000000    -0.000000   0.000000   )
 (  0.000000   0.000000     0.000000   0.000000    -0.000000   0.000000   )
 ( -0.000000   0.000000     0.000000   0.000000    -0.000000   0.000000   )
 (  0.000000   0.000000     0.000000   0.000000     0.000000   0.000000   )
 ( -0.000000   0.000000     0.000000   0.000000     0.000000   0.000000   )
 ( -0.000000   0.000000    -0.000000   0.000000     0.000000   0.000000   )
 (  0.000000   0.000000     0.000000   0.000000    -0.000000   0.000000   )
 ( -0.000000   0.000000     0.000000   0.000000    -0.000000   0.000000   )
 ( -0.000000   0.000000    -0.000000   0.000000    -0.000000   0.000000   )
 ( -0.002087   0.000000    -0.001205   0.000000    -0.035839   0.000000   )
 (  0.002096   0.000000    -0.001210   0.000000    -0.035998   0.000000   )
 (  0.000000   0.000000     0.002422   0.000000    -0.036016   0.000000   )
 ( -0.000000   0.000000    -0.000000   0.000000    -0.000000   0.000000   )
 (  0.000000   0.000000     0.000000   0.000000    -0.000000   0.000000   )
 ( -0.000000   0.000000     0.000000   0.000000    -0.000000   0.000000   )
 ( -0.000000   0.000000    -0.000000   0.000000     0.000000   0.000000   )
 (  0.000000   0.000000     0.000000   0.000000     0.000000   0.000000   )
 ( -0.000000   0.000000     0.000000   0.000000     0.000000   0.000000   )
 ( -0.000000   0.000000    -0.000000   0.000000     0.000000   0.000000   )
 (  0.000000   0.000000     0.000000   0.000000     0.000000   0.000000   )
 ( -0.000000   0.000000     0.000000   0.000000     0.000000   0.000000   )
 (  0.000000   0.000000     0.000000   0.000000    -0.000000   0.000000   )
 ( -0.000000   0.000000    -0.000000   0.000000    -0.000000   0.000000   )
 ( -0.000000   0.000000    -0.000000   0.000000    -0.000000   0.000000   )
 ( -0.000000   0.000000    -0.000000   0.000000     0.000000   0.000000   )
 (  0.000000   0.000000    -0.000000   0.000000     0.000000   0.000000   )
 (  0.000000   0.000000     0.000000   0.000000     0.000000   0.000000   )
 (  0.000000   0.000000     0.000000   0.000000     0.000000   0.000000   )
 ( -0.000000   0.000000     0.000000   0.000000     0.000000   0.000000   )
 ( -0.000000   0.000000    -0.000000   0.000000     0.000000   0.000000   )
 (  0.000000   0.000000     0.000000   0.000000    -0.000000   0.000000   )
 ( -0.000000   0.000000    -0.000000   0.000000    -0.000000   0.000000   )
 (  0.000000   0.000000    -0.000000   0.000000    -0.000000   0.000000   )
 ( -0.000000   0.000000    -0.000000   0.000000    -0.000000   0.000000   )
 ( -0.000000   0.000000     0.000000   0.000000    -0.000000   0.000000   )
 (  0.000000   0.000000    -0.000000   0.000000    -0.000000   0.000000   )
 ( -0.000000   0.000000    -0.000000   0.000000    -0.000000   0.000000   )
 (  0.000000   0.000000     0.000000   0.000000    -0.000000   0.000000   )
 ( -0.000000   0.000000     0.000000   0.000000    -0.000000   0.000000   )
 (  0.000000   0.000000     0.000000   0.000000    -0.000000   0.000000   )
 (  0.000000   0.000000    -0.000000   0.000000    -0.000000   0.000000   )
 ( -0.000000   0.000000     0.000000   0.000000    -0.000000   0.000000   )
 ( -0.000000   0.000000    -0.000000   0.000000     0.000000   0.000000   )
 (  0.000000   0.000000    -0.000000   0.000000     0.000000   0.000000   )
 ( -0.000000   0.000000     0.000000   0.000000     0.000000   0.000000   )
 (  0.000000   0.000000     0.000000   0.000000     0.000000   0.000000   )
 (  0.000000   0.000000    -0.000000   0.000000     0.000000   0.000000   )
 ( -0.000000   0.000000    -0.000000   0.000000     0.000000   0.000000   )
 (  0.000000   0.000000    -0.000000   0.000000    -0.000000   0.000000   )
 ( -0.000000   0.000000     0.000000   0.000000    -0.000000   0.000000   )
 ( -0.000000   0.000000    -0.000000   0.000000    -0.000000   0.000000   )
 (  0.000000   0.000000    -0.000000   0.000000    -0.000000   0.000000   )
 ( -0.000000   0.000000    -0.000000   0.000000    -0.000000   0.000000   )
 (  0.000000   0.000000     0.000000   0.000000    -0.000000   0.000000   )
 (  0.000000   0.000000    -0.000000   0.000000     0.000000   0.000000   )
 (  0.000000   0.000000     0.000000   0.000000     0.000000   0.000000   )
 ( -0.000000   0.000000    -0.000000   0.000000     0.000000   0.000000   )
 (  0.000000   0.000000    -0.000000   0.000000     0.000000   0.000000   )
 ( -0.000000   0.000000    -0.000000   0.000000     0.000000   0.000000   )
 ( -0.000000   0.000000     0.000000   0.000000     0.000000   0.000000   )
 ( -0.000000   0.000000    -0.000000   0.000000     0.000000   0.000000   )
 (  0.000000   0.000000     0.000000   0.000000     0.000000   0.000000   )
 ( -0.000000   0.000000     0.000000   0.000000     0.000000   0.000000   )
 (  0.000000   0.000000     0.000000   0.000000     0.000000   0.000000   )
 (  0.000000   0.000000    -0.000000   0.000000     0.000000   0.000000   )
 ( -0.000000   0.000000     0.000000   0.000000     0.000000   0.000000   )
 (  0.000000   0.000000    -0.000000   0.000000     0.000000   0.000000   )
 (  0.000000   0.000000     0.000000   0.000000     0.000000   0.000000   )
 ( -0.000000   0.000000    -0.000000   0.000000     0.000000   0.000000   )
 (  0.000000   0.000000    -0.000000   0.000000     0.000000   0.000000   )
 ( -0.000000   0.000000    -0.000000   0.000000     0.000000   0.000000   )
 ( -0.000000   0.000000     0.000000   0.000000     0.000000   0.000000   )
 (  0.000000   0.000000     0.000000   0.000000    -0.000000   0.000000   )
 ( -0.000000   0.000000     0.000000   0.000000    -0.000000   0.000000   )
 ( -0.000000   0.000000    -0.000000   0.000000    -0.000000   0.000000   )
 (  0.000000   0.000000    -0.000000   0.000000    -0.000000   0.000000   )
 ( -0.000000   0.000000     0.000000   0.000000    -0.000000   0.000000   )
 (  0.000000   0.000000     0.000000   0.000000    -0.000000   0.000000   )
 ( -0.000000   0.000000     0.000000   0.000000    -0.000000   0.000000   )
 ( -0.000000   0.000000    -0.000000   0.000000    -0.000000   0.000000   )
 (  0.000000   0.000000     0.000000   0.000000    -0.000000   0.000000   )
 ( -0.000000   0.000000     0.000000   0.000000    -0.000000   0.000000   )
 (  0.000000   0.000000     0.000000   0.000000    -0.000000   0.000000   )
 (  0.000000   0.000000    -0.000000   0.000000    -0.000000   0.000000   )
 (  0.000000   0.000000     0.000000   0.000000     0.000000   0.000000   )
 ( -0.000000   0.000000    -0.000000   0.000000    -0.000000   0.000000   )
 (  0.000002   0.000000     0.000001   0.000000     0.003871   0.000000   )
 ( -0.000000   0.000000    -0.000000   0.000000    -0.000000   0.000000   )
 (  0.000000   0.000000    -0.000000   0.000000    -0.000000   0.000000   )
 (  0.000000   0.000000     0.000000   0.000000    -0.000000   0.000000   )
 ( -0.000000   0.000000    -0.000000   0.000000    -0.000000   0.000000   )
 (  0.000000   0.000000    -0.000000   0.000000    -0.000000   0.000000   )
 (  0.000000   0.000000     0.000000   0.000000    -0.000000   0.000000   )
 (  0.028990   0.000000     0.016736   0.000000     0.573446   0.000000   )
 ( -0.029118   0.000000     0.016808   0.000000     0.575990   0.000000   )
 (  0.000000   0.000000    -0.033641   0.000000     0.576284   0.000000   )
     freq (  483) =     112.920401 [THz] =    3766.619131 [cm-1]
 (  0.000000   0.000000    -0.000000   0.000000    -0.000000   0.000000   )
 (  0.000000   0.000000    -0.000000   0.000000    -0.000000   0.000000   )
 (  0.000000   0.000000     0.000000   0.000000    -0.000000   0.000000   )
 ( -0.000000   0.000000     0.000000   0.000000    -0.000000   0.000000   )
 (  0.000000   0.000000    -0.000000   0.000000    -0.000000   0.000000   )
 (  0.000000   0.000000     0.000000   0.000000     0.000000   0.000000   )
 ( -0.000000   0.000000     0.000000   0.000000     0.000000   0.000000   )
 ( -0.000000   0.000000    -0.000000   0.000000     0.000000   0.000000   )
 (  0.000000   0.000000     0.000000   0.000000     0.000000   0.000000   )
 ( -0.000000   0.000000     0.000000   0.000000     0.000000   0.000000   )
 (  0.000000   0.000000    -0.000000   0.000000     0.000000   0.000000   )
 (  0.000000   0.000000    -0.000000   0.000000    -0.000000   0.000000   )
 (  0.000000   0.000000     0.000000   0.000000    -0.000000   0.000000   )
 ( -0.000000   0.000000     0.000000   0.000000    -0.000000   0.000000   )
 (  0.000000   0.000000     0.000000   0.000000    -0.000000   0.000000   )
 ( -0.000000   0.000000    -0.000000   0.000000    -0.000000   0.000000   )
 ( -0.000000   0.000000     0.000000   0.000000    -0.000000   0.000000   )
 ( -0.000000   0.000000    -0.000000   0.000000     0.000000   0.000000   )
 (  0.000000   0.000000    -0.000000   0.000000     0.000000   0.000000   )
 (  0.000000   0.000000     0.000000   0.000000     0.000000   0.000000   )
 ( -0.000000   0.000000     0.000000   0.000000     0.000000   0.000000   )
 (  0.000000   0.000000    -0.000000   0.000000     0.000000   0.000000   )
 ( -0.000000   0.000000    -0.000000   0.000000     0.000000   0.000000   )
 ( -0.000000   0.000000    -0.000000   0.000000     0.000000   0.000000   )
 (  0.000000   0.000000    -0.000000   0.000000     0.000000   0.000000   )
 ( -0.000000   0.000000     0.000000   0.000000     0.000000   0.000000   )
 (  0.000000   0.000000     0.000000   0.000000     0.000000   0.000000   )
 (  0.000000   0.000000    -0.000000   0.000000     0.000000   0.000000   )
 ( -0.000000   0.000000    -0.000000   0.000000     0.000000   0.000000   )
 ( -0.000000   0.000000    -0.000000   0.000000     0.000000   0.000000   )
 (  0.000000   0.000000     0.000000   0.000000     0.000000   0.000000   )
 ( -0.000000   0.000000     0.000000   0.000000     0.000000   0.000000   )
 (  0.000000   0.000000     0.000000   0.000000     0.000000   0.000000   )
 (  0.000000   0.000000    -0.000000   0.000000     0.000000   0.000000   )
 ( -0.000000   0.000000     0.000000   0.000000     0.000000   0.000000   )
 (  0.000000   0.000000     0.000000   0.000000     0.000000   0.000000   )
 ( -0.000000   0.000000    -0.000000   0.000000     0.000000   0.000000   )
 (  0.000000   0.000000    -0.000000   0.000000     0.000000   0.000000   )
 ( -0.000000   0.000000    -0.000000   0.000000     0.000000   0.000000   )
 ( -0.000000   0.000000     0.000000   0.000000     0.000000   0.000000   )
 (  0.000000   0.000000    -0.000000   0.000000     0.000000   0.000000   )
 (  0.000000   0.000000     0.000000   0.000000    -0.000000   0.000000   )
 ( -0.000000   0.000000     0.000000   0.000000    -0.000000   0.000000   )
 (  0.000000   0.000000    -0.000000   0.000000    -0.000000   0.000000   )
 ( -0.000000   0.000000    -0.000000   0.000000    -0.000000   0.000000   )
 ( -0.000000   0.000000     0.000000   0.000000    -0.000000   0.000000   )
 (  0.000000   0.000000     0.000000   0.000000    -0.000000   0.000000   )
 ( -0.000000   0.000000     0.000000   0.000000    -0.000000   0.000000   )
 ( -0.000000   0.000000    -0.000000   0.000000    -0.000000   0.000000   )
 (  0.000000   0.000000    -0.000000   0.000000    -0.000000   0.000000   )
 (  0.000000   0.000000    -0.000000   0.000000    -0.000000   0.000000   )
 (  0.000000   0.000000     0.000000   0.000000    -0.000000   0.000000   )
 ( -0.000000   0.000000     0.000000   0.000000    -0.000000   0.000000   )
 ( -0.000000   0.000000     0.000000   0.000000     0.000000   0.000000   )
 ( -0.000000   0.000000    -0.000000   0.000000     0.000000   0.000000   )
 (  0.000000   0.000000    -0.000000   0.000000     0.000000   0.000000   )
 ( -0.000000   0.000000    -0.000000   0.000000     0.000000   0.000000   )
 ( -0.000000   0.000000     0.000000   0.000000    -0.000000   0.000000   )
 ( -0.000000   0.000000    -0.000000   0.000000     0.062882   0.000000   )
 (  0.000000   0.000000    -0.000000   0.000000     0.000000   0.000000   )
 (  0.000000   0.000000     0.000000   0.000000     0.000000   0.000000   )
 ( -0.000000   0.000000     0.000000   0.000000     0.000000   0.000000   )
 ( -0.000000   0.000000     0.000000   0.000000    -0.000000   0.000000   )
 ( -0.000000   0.000000    -0.000000   0.000000    -0.000000   0.000000   )
 (  0.000000   0.000000    -0.000000   0.000000    -0.000000   0.000000   )
 (  0.000000   0.000000     0.000000   0.000000    -0.000000   0.000000   )
 ( -0.000000   0.000000    -0.000000   0.000000    -0.000000   0.000000   )
 (  0.000000   0.000000    -0.000000   0.000000    -0.000000   0.000000   )
 (  0.000000   0.000000     0.000000   0.000000     0.000000   0.000000   )
 ( -0.000000   0.000000     0.000000   0.000000     0.000000   0.000000   )
 ( -0.000000   0.000000    -0.000000   0.000000     0.000000   0.000000   )
 (  0.000000   0.000000     0.000000   0.000000    -0.000000   0.000000   )
 ( -0.000000   0.000000     0.000000   0.000000    -0.000000   0.000000   )
 (  0.000000   0.000000    -0.000000   0.000000    -0.000000   0.000000   )
 ( -0.000002   0.000000    -0.000001   0.000000    -0.000146   0.000000   )
 (  0.000002   0.000000    -0.000001   0.000000    -0.000146   0.000000   )
 ( -0.000000   0.000000     0.000002   0.000000    -0.000146   0.000000   )
 ( -0.000000   0.000000    -0.000000   0.000000    -0.000000   0.000000   )
 (  0.000000   0.000000     0.000000   0.000000    -0.000000   0.000000   )
 ( -0.000000   0.000000     0.000000   0.000000    -0.000000   0.000000   )
 ( -0.000000   0.000000    -0.000000   0.000000     0.000000   0.000000   )
 (  0.000000   0.000000     0.000000   0.000000     0.000000   0.000000   )
 ( -0.000000   0.000000     0.000000   0.000000     0.000000   0.000000   )
 (  0.000000   0.000000    -0.000000   0.000000     0.000000   0.000000   )
 (  0.000000   0.000000     0.000000   0.000000     0.000000   0.000000   )
 ( -0.000000   0.000000     0.000000   0.000000     0.000000   0.000000   )
 ( -0.000000   0.000000    -0.000000   0.000000    -0.000000   0.000000   )
 (  0.000000   0.000000    -0.000000   0.000000    -0.000000   0.000000   )
 ( -0.000000   0.000000     0.000000   0.000000    -0.000000   0.000000   )
 ( -0.000000   0.000000    -0.000000   0.000000     0.000000   0.000000   )
 (  0.000000   0.000000    -0.000000   0.000000     0.000000   0.000000   )
 (  0.000000   0.000000     0.000000   0.000000     0.000000   0.000000   )
 ( -0.000000   0.000000    -0.000000   0.000000     0.000000   0.000000   )
 (  0.000000   0.000000    -0.000000   0.000000     0.000000   0.000000   )
 (  0.000000   0.000000     0.000000   0.000000     0.000000   0.000000   )
 (  0.000000   0.000000     0.000000   0.000000    -0.000000   0.000000   )
 ( -0.000000   0.000000     0.000000   0.000000    -0.000000   0.000000   )
 (  0.000000   0.000000    -0.000000   0.000000    -0.000000   0.000000   )
 ( -0.000000   0.000000    -0.000000   0.000000    -0.000000   0.000000   )
 ( -0.000000   0.000000     0.000000   0.000000    -0.000000   0.000000   )
 (  0.000000   0.000000     0.000000   0.000000    -0.000000   0.000000   )
 (  0.000000   0.000000    -0.000000   0.000000    -0.000000   0.000000   )
 ( -0.000000   0.000000     0.000000   0.000000    -0.000000   0.000000   )
 ( -0.000000   0.000000    -0.000000   0.000000    -0.000000   0.000000   )
 (  0.000000   0.000000    -0.000000   0.000000    -0.000000   0.000000   )
 ( -0.000000   0.000000    -0.000000   0.000000    -0.000000   0.000000   )
 (  0.000000   0.000000     0.000000   0.000000    -0.000000   0.000000   )
 (  0.000000   0.000000     0.000000   0.000000     0.000000   0.000000   )
 ( -0.000000   0.000000    -0.000000   0.000000     0.000000   0.000000   )
 (  0.000000   0.000000    -0.000000   0.000000     0.000000   0.000000   )
 ( -0.000000   0.000000    -0.000000   0.000000     0.000000   0.000000   )
 ( -0.000000   0.000000     0.000000   0.000000     0.000000   0.000000   )
 (  0.000000   0.000000    -0.000000   0.000000     0.000000   0.000000   )
 (  0.000000   0.000000    -0.000000   0.000000    -0.000000   0.000000   )
 (  0.000000   0.000000     0.000000   0.000000    -0.000000   0.000000   )
 ( -0.000000   0.000000    -0.000000   0.000000    -0.000000   0.000000   )
 (  0.000000   0.000000    -0.000000   0.000000    -0.000000   0.000000   )
 ( -0.000000   0.000000    -0.000000   0.000000    -0.000000   0.000000   )
 ( -0.000000   0.000000     0.000000   0.000000    -0.000000   0.000000   )
 ( -0.000000   0.000000    -0.000000   0.000000     0.000000   0.000000   )
 (  0.000000   0.000000    -0.000000   0.000000     0.000000   0.000000   )
 (  0.000000   0.000000     0.000000   0.000000     0.000000   0.000000   )
 ( -0.000000   0.000000     0.000000   0.000000     0.000000   0.000000   )
 (  0.000000   0.000000    -0.000000   0.000000     0.000000   0.000000   )
 ( -0.000000   0.000000    -0.000000   0.000000     0.000000   0.000000   )
 ( -0.000000   0.000000    -0.000000   0.000000     0.000000   0.000000   )
 (  0.000000   0.000000    -0.000000   0.000000     0.000000   0.000000   )
 ( -0.000000   0.000000     0.000000   0.000000     0.000000   0.000000   )
 (  0.000000   0.000000     0.000000   0.000000     0.000000   0.000000   )
 (  0.000000   0.000000    -0.000000   0.000000     0.000000   0.000000   )
 ( -0.000000   0.000000    -0.000000   0.000000     0.000000   0.000000   )
 (  0.000000   0.000000    -0.000000   0.000000     0.000000   0.000000   )
 (  0.000000   0.000000     0.000000   0.000000     0.000000   0.000000   )
 ( -0.000000   0.000000     0.000000   0.000000     0.000000   0.000000   )
 (  0.000000   0.000000     0.000000   0.000000     0.000000   0.000000   )
 ( -0.000000   0.000000    -0.000000   0.000000     0.000000   0.000000   )
 ( -0.000000   0.000000     0.000000   0.000000     0.000000   0.000000   )
 (  0.000000   0.000000     0.000000   0.000000     0.000000   0.000000   )
 ( -0.000000   0.000000     0.000000   0.000000     0.000000   0.000000   )
 ( -0.000000   0.000000    -0.000000   0.000000     0.000000   0.000000   )
 (  0.000000   0.000000    -0.000000   0.000000     0.000000   0.000000   )
 ( -0.000000   0.000000     0.000000   0.000000     0.000000   0.000000   )
 (  0.000000   0.000000     0.000000   0.000000     0.000000   0.000000   )
 ( -0.000000   0.000000     0.000000   0.000000    -0.000000   0.000000   )
 (  0.000000   0.000000    -0.000000   0.000000    -0.000000   0.000000   )
 (  0.000000   0.000000     0.000000   0.000000    -0.000000   0.000000   )
 ( -0.000000   0.000000     0.000000   0.000000    -0.000000   0.000000   )
 (  0.000000   0.000000     0.000000   0.000000    -0.000000   0.000000   )
 ( -0.000000   0.000000    -0.000000   0.000000    -0.000000   0.000000   )
 (  0.000000   0.000000    -0.000000   0.000000     0.000000   0.000000   )
 (  0.000000   0.000000    -0.000000   0.000000     0.000000   0.000000   )
 ( -0.000004   0.000000     0.000003   0.000000    -0.998014   0.000000   )
 (  0.000000   0.000000     0.000000   0.000000     0.000000   0.000000   )
 ( -0.000000   0.000000     0.000000   0.000000     0.000000   0.000000   )
 (  0.000000   0.000000    -0.000000   0.000000     0.000000   0.000000   )
 ( -0.000000   0.000000    -0.000000   0.000000    -0.000000   0.000000   )
 (  0.000000   0.000000    -0.000000   0.000000    -0.000000   0.000000   )
 ( -0.000000   0.000000     0.000000   0.000000    -0.000000   0.000000   )
 (  0.000208   0.000000     0.000121   0.000000     0.002160   0.000000   )
 ( -0.000207   0.000000     0.000121   0.000000     0.002159   0.000000   )
 (  0.000001   0.000000    -0.000239   0.000000     0.002158   0.000000   )
 **************************************************************************
