# Supplementary material for: Theoretical OH stretching vibrations in dravite
Source: Copernicus journal article supplement (doi:10.5194/ejm-34-239-2022), 2022-04-13
Supplement: Supplementary file 3 [file ejm-34-239-2022-supplement.zip › ejm-2021-65-supplement-version2/supplementary_files/Structure_and_eigendisplacement_files/dravite_models_with_YZ_inversion/dravite_inver_2_1_PBE.cif]

#======================================================================

# CRYSTAL DATA

#----------------------------------------------------------------------

data_VESTA_phase_1


_pd_phase_name                         
_cell_length_a 16.1067867
_cell_length_b 16.1067867
_cell_length_c 7.27903080
_cell_angle_alpha                      90
_cell_angle_beta                       90
_cell_angle_gamma                      120
_symmetry_space_group_name_H-M         'P1'
_symmetry_Int_Tables_number            1

loop_
_symmetry_equiv_pos_as_xyz
   'x, y, z'

loop_
   _atom_site_label
   _atom_site_fract_x
   _atom_site_fract_y
   _atom_site_fract_z
Na       0.001781271   0.000974996   0.274874846
Na       0.673152367   0.336551404   0.610806327
Na       0.335439665   0.667718685   0.940169582
Mg       0.126038037   0.063007619   0.647355785
Mg       0.936685244   0.063255737   0.642462521
Mg       0.936687929   0.873402177   0.642256019
Mg       0.795374046   0.397690378   0.981414072
Mg       0.603910070   0.396548165   0.979977442
Mg       0.603913760   0.207378173   0.980035551
Mg       0.461625000   0.730816016   0.316701851
Al       0.268582689   0.730180619   0.318773498
Al       0.268578226   0.538401580   0.318783561
Al       0.298030315   0.261324529   0.630221978
Al       0.738793049   0.037543109   0.631801872
Al       0.963448606   0.701528519   0.631134664
Al       0.738787593   0.701249997   0.631761625
Al       0.963443813   0.261909584   0.631198409
Al       0.298038414   0.036707816   0.630205965
Al       0.966772772   0.596267393   0.964707737
Al       0.405326593   0.368939329   0.964628531
Al       0.629219600   0.034058797   0.964969477
Al       0.405334594   0.036394160   0.964622777
Al       0.629216607   0.595165336   0.964936175
Al       0.966772958   0.370501438   0.964755715
Al       0.631587006   0.928256819   0.300726832
Mg       0.071014289   0.702053996   0.298625326
Al       0.297376003   0.368650654   0.298573920
Mg       0.071008792   0.368959822   0.298682356
Al       0.297384005   0.928729035   0.298561979
Al       0.631588200   0.703342618   0.300691630
Si       0.191495752   0.190939972   0.015148621
Si       0.807863200   0.000998598   0.015290682
Si       0.996012139   0.805958194   0.012157164
Si       0.807858871   0.806866100   0.015224424
Si       0.996010952   0.190045081   0.012248786
Si       0.191505592   0.000559322   0.015126445
Si       0.857545139   0.523228746   0.352231307
Si       0.474882112   0.334469014   0.349084527
Si       0.662277157   0.138927465   0.349806262
Si       0.474886620   0.140422708   0.349092021
Si       0.662272735   0.523355988   0.349770079
Si       0.857544998   0.334318699   0.352265836
Si       0.526046901   0.857243748   0.685503849
Si       0.146401103   0.669758544   0.689752124
Si       0.331732407   0.474992397   0.688497146
Si       0.146398825   0.476642072   0.689776991
Si       0.331735643   0.856743227   0.688489225
Si       0.526045144   0.668806884   0.685486397
B        0.109683293   0.220182329   0.478690402
B        0.778811144   0.889410664   0.472854227
B        0.109689465   0.889507288   0.478598472
B        0.777511555   0.554254366   0.809011162
B        0.447068451   0.223534837   0.804775763
B        0.777512534   0.223257101   0.809064425
B        0.441196546   0.886070243   0.146395780
B        0.116672076   0.558337048   0.127306053
B        0.441192851   0.555129385   0.146391273
O       -0.001098632  -0.000595291   0.792315710
O        0.666507955   0.333273269   0.128144135
O        0.327625032   0.663813873   0.451946451
O        0.063791019   0.123123481   0.496372202
O        0.875113277   0.937566584   0.494934031
O        0.063808508   0.940685211   0.496227577
O        0.728951360   0.457791130   0.834871698
O        0.543326741   0.271663712   0.829959126
O        0.728952129   0.271160012   0.834928779
O        0.386791136   0.787902512   0.182044643
O        0.216072347   0.608036015   0.181610381
O        0.386786630   0.598889717   0.182050513
O        0.270715073   0.135358526   0.530041167
O        0.862686653   0.133241258   0.529848688
O        0.862677058   0.729434552   0.529774264
O        0.936039615   0.468016310   0.862267186
O        0.530590538   0.468347821   0.865258023
O        0.530598077   0.062251572   0.865280787
O        0.601288896   0.800651413   0.201240446
O        0.215422598   0.799513035   0.195952170
O        0.215414525   0.415905282   0.195976334
O        0.092510495   0.187214140   0.083437042
O        0.809221455   0.904608281   0.085673692
O        0.092508944   0.905292649   0.083332565
O        0.756197666   0.517613950   0.414978460
O        0.477799782   0.238903879   0.420020389
O        0.756196717   0.238593079   0.415035549
O        0.425001077   0.849031082   0.757658476
O        0.158251579   0.579128089   0.765152485
O        0.425002201   0.575971727   0.757645671
O        0.184939363   0.092466449   0.104530245
O        0.907121569   0.089962967   0.105274758
O        0.907131366   0.817171626   0.105154329
O        0.843668306   0.421839080   0.441465237
O        0.571871029   0.425209533   0.441314050
O        0.571872281   0.146671897   0.441338071
O        0.519361369   0.759681296   0.777178713
O        0.241460834   0.762214158   0.787868806
O        0.241463716   0.479253772   0.787886682
O        0.199700205   0.190303757   0.793868235
O        0.808679909   0.007875191   0.793930244
O        0.988298475   0.801971953   0.791250300
O        0.808677181   0.800811820   0.793862621
O        0.988295896   0.186319394   0.791344780
O        0.199712688   0.009401635   0.793846203
O        0.868588371   0.522902254   0.131336876
O        0.476061633   0.340832554   0.127529955
O        0.652569148   0.130432790   0.128941087
O        0.476065153   0.135236008   0.127537722
O        0.652561755   0.522140219   0.128906194
O        0.868585949   0.345685794   0.131370124
O        0.530076518   0.854971536   0.463724712
O        0.160660644   0.678147208   0.468628625
O        0.322999738   0.474071254   0.464470657
O        0.160658976   0.482515108   0.468653333
O        0.323007720   0.848931841   0.464461422
O        0.530078812   0.675114152   0.463708276
O        0.284477132   0.286945466   0.098908191
O        0.712332825  -0.001454078   0.100650135
O        0.995712046   0.712211071   0.088530549
O        0.712333479   0.713790443   0.100606870
O        0.995714841   0.283500683   0.088589973
O        0.284482769  -0.002465065   0.098897673
O        0.946815911   0.614894591   0.445698862
O        0.380704414   0.334632376   0.432971082
O        0.664387181   0.046001235   0.434386786
O        0.380709991   0.046077163   0.432965650
O        0.664385690   0.618394571   0.434344852
O        0.946810142   0.331920460   0.445757359
O        0.617752508   0.952524634   0.767729539
O        0.048407585   0.664242936   0.759643986
O        0.336155199   0.382714814   0.764793124
O        0.048410585   0.384164925   0.759694771
O        0.336161706   0.953444657   0.764785741
O        0.617751930   0.665229129   0.767696485
O        0.211356968   0.273249129   0.461459130
O        0.727048028   0.938110999   0.462684970
O        0.061631119   0.791309450   0.476852797
O        0.727054841   0.788947729   0.462643526
O        0.061636992   0.270332408   0.476939723
O        0.211366248   0.938104045   0.461438036
O        0.877026407   0.605295946   0.797197777
O        0.395689514   0.272598572   0.793315365
O        0.726828594   0.122447847   0.796182392
O        0.395693802   0.123092720   0.793309751
O        0.726828258   0.604382157   0.796142262
O        0.877026632   0.271727951   0.797252087
O        0.539993883   0.930713797   0.126724033
O        0.071064536   0.609418238   0.105797067
O        0.396638840   0.456408132   0.132551916
O        0.071057582   0.461645591   0.105845134
O        0.396642128   0.940236026   0.132545593
O        0.539989828   0.609287800   0.126697779
H       -0.005845011  -0.003220341   0.923753759
H        0.671893575   0.336022920   0.259529693
H        0.310520916   0.655263662   0.580368176
H        0.266785480   0.133396905   0.396627191
H        0.863335145   0.134276489   0.396337534
H        0.863302210   0.729007047   0.396263514
H        0.933387783   0.466681955   0.728809675
H        0.531605506   0.466949007   0.731718297
H        0.531624818   0.064676310   0.731741614
H        0.603501223   0.801765303   0.067757477
H        0.215123015   0.796578422   0.062079613
H        0.215103435   0.418533147   0.062104126
