# Supplementary material for: Theoretical OH stretching vibrations in dravite
Source: Copernicus journal article supplement (doi:10.5194/ejm-34-239-2022), 2022-04-13
Supplement: Supplementary file 3 [file ejm-34-239-2022-supplement.zip › ejm-2021-65-supplement-version2/supplementary_files/Structure_and_eigendisplacement_files/dravite_models_with_YZ_inversion/dravite_inver_2_2_PBE.cif]

#======================================================================

# CRYSTAL DATA

#----------------------------------------------------------------------

data_VESTA_phase_1


_pd_phase_name                         
_cell_length_a 16.1067867
_cell_length_b 16.1067867
_cell_length_c 7.27903080
_cell_angle_alpha                      90
_cell_angle_beta                       90
_cell_angle_gamma                      120
_symmetry_space_group_name_H-M         'P1'
_symmetry_Int_Tables_number            1

loop_
_symmetry_equiv_pos_as_xyz
   'x, y, z'

loop_
   _atom_site_label
   _atom_site_fract_x
   _atom_site_fract_y
   _atom_site_fract_z
Na       0.001333628   0.001006201   0.274810936
Na       0.666416319   0.336714808   0.610492597
Na       0.336275871   0.667247693   0.941087707
Mg       0.126028511   0.063515916   0.642485156
Mg       0.936294434   0.062878332   0.646968145
Mg       0.937006121   0.873330801   0.642396222
Mg       0.793601498   0.397387290   0.980356280
Mg       0.602390302   0.396593586   0.980799818
Mg       0.603693322   0.207288328   0.979633411
Mg       0.461454498   0.730054749   0.316311527
Al       0.268871809   0.731038979   0.320033141
Al       0.269241094   0.538536142   0.319506672
Al       0.297808199   0.261458485   0.630970841
Al       0.738834091   0.037514905   0.631903097
Al       0.963058407   0.701285262   0.630187568
Al       0.738558615   0.701322807   0.632773902
Al       0.963344057   0.262046434   0.630354399
Al       0.298040397   0.036779587   0.629768695
Al       0.966029237   0.596221328   0.964309124
Al       0.403462809   0.368547060   0.965361499
Al       0.629325105   0.034144169   0.965236106
Al       0.405292120   0.036183813   0.964261186
Al       0.628383955   0.594812762   0.965122012
Al       0.964619817   0.370618920   0.963895632
Al       0.631850743   0.927784459   0.300798054
Mg       0.071112051   0.702866908   0.297474505
Mg       0.296928075   0.368294597   0.298154342
Al       0.071267835   0.369771465   0.298564405
Al       0.297896599   0.929242192   0.298169225
Al       0.631194887   0.702803874   0.301237654
Si       0.193118104   0.188898332   0.012069803
Si       0.809185516   0.002889061   0.016467203
Si       0.995480231   0.804759738   0.011998006
Si       0.808541236   0.807961862   0.015728813
Si       0.999722615   0.192138931   0.015206687
Si       0.190840608  -0.001478625   0.013457209
Si       0.858164293   0.522984100   0.351931245
Si       0.475701479   0.333824872   0.352460840
Si       0.664906279   0.139326143   0.349176646
Si       0.477005895   0.139881084   0.349563281
Si       0.662974467   0.523452789   0.350050030
Si       0.858772355   0.334698460   0.348792308
Si       0.526730480   0.857536676   0.685601857
Si       0.145731380   0.669627724   0.688535272
Si       0.331432764   0.476624005   0.689491512
Si       0.144532621   0.475207750   0.689441838
Si       0.331985044   0.856347174   0.688542654
Si       0.525734315   0.668824142   0.687102238
B        0.109565804   0.220408238   0.478738907
B        0.779092533   0.889252169   0.474279568
B        0.109941634   0.889551644   0.477314117
B        0.777104466   0.554131186   0.808889920
B        0.446190009   0.223226678   0.806922164
B        0.776804059   0.223526084   0.806175076
B        0.441250099   0.885865296   0.146271529
B        0.114662381   0.557406446   0.137497311
B        0.440418420   0.556141046   0.137076938
O       -0.000857767  -0.000576915   0.792237001
O        0.666917844   0.333080758   0.127852843
O        0.325708757   0.663989681   0.451602896
O        0.058227636   0.123333991   0.496162257
O        0.875303001   0.937622153   0.497017184
O        0.063800310   0.940566277   0.494220496
O        0.728287621   0.457677357   0.834963365
O        0.542682073   0.271091357   0.832296602
O        0.728711189   0.271667754   0.831532559
O        0.386729677   0.787667776   0.182026596
O        0.213717156   0.605879256   0.184801093
O        0.386004969   0.600323492   0.179045985
O        0.270334255   0.133034518   0.529266755
O        0.864803493   0.135661987   0.530472761
O        0.862745805   0.729271824   0.529833331
O        0.936570333   0.467471007   0.863003453
O        0.531987261   0.468655761   0.863600440
O        0.531291400   0.062113023   0.865219642
O        0.602027605   0.801478117   0.202049094
O        0.215372873   0.799161214   0.195290380
O        0.201034026   0.416568716   0.195911387
O        0.094565835   0.187543663   0.083432616
O        0.812777996   0.907578690   0.085777381
O        0.093597794   0.901697350   0.082991006
O        0.757563133   0.518067671   0.414518858
O        0.483548299   0.239707213   0.418521428
O        0.761493108   0.237096683   0.416717853
O        0.425426702   0.848924654   0.757421949
O        0.154791864   0.576924522   0.761145119
O        0.424186165   0.578000734   0.762729484
O        0.179682953   0.087453405   0.102635065
O        0.907294162   0.094477961   0.106040145
O        0.907817483   0.817716995   0.105203727
O        0.845583966   0.421465411   0.440402772
O        0.574705399   0.424724551   0.442456150
O        0.574806965   0.146790609   0.441230176
O        0.521008877   0.760969982   0.778529739
O        0.241872065   0.760705401   0.786734341
O        0.239266951   0.479297794   0.788398161
O        0.197790458   0.186026498   0.791147740
O        0.810193848   0.010378890   0.795088898
O        0.987662866   0.801038738   0.791186902
O        0.808920195   0.801504779   0.794296595
O        0.990868373   0.190861224   0.793888265
O        0.198685897   0.007003355   0.792200029
O        0.868962557   0.521245726   0.131137920
O        0.477507474   0.343970736   0.131051733
O        0.655195570   0.131783265   0.128220340
O        0.477430885   0.133717619   0.128105626
O        0.653956683   0.523413746   0.129212190
O        0.866294770   0.342135536   0.127607278
O        0.530276249   0.855004828   0.463797232
O        0.159773822   0.678105490   0.467470402
O        0.322116721   0.482873906   0.468973748
O        0.151412387   0.474370244   0.464934007
O        0.322940728   0.848635853   0.464480161
O        0.529981283   0.675391466   0.465228809
O        0.287399246   0.281927701   0.088963930
O        0.712737494  -0.001353357   0.100651453
O        0.993587303   0.710216394   0.088908534
O        0.712985848   0.715292926   0.101286959
O        1.003103694   0.288187141   0.098971855
O        0.284929683  -0.002225921   0.098560837
O        0.947642070   0.614392372   0.445378049
O        0.383297694   0.330388159   0.444218275
O        0.665782040   0.045880145   0.433583733
O        0.382138771   0.045901648   0.433508519
O        0.664811970   0.618389683   0.434960363
O        0.953902996   0.336539534   0.433902370
O        0.618460047   0.953216624   0.767354871
O        0.048270440   0.664471390   0.760394922
O        0.335944344   0.383669803   0.760607989
O        0.047339236   0.383267106   0.764621988
O        0.336107824   0.952675332   0.765088697
O        0.617791435   0.665265590   0.767813649
O        0.207799101   0.270268926   0.477627769
O        0.727847224   0.938562212   0.463823759
O        0.061457726   0.791198266   0.476563161
O        0.727148852   0.788999489   0.463316541
O        0.061389357   0.273866426   0.461082160
O        0.211583282   0.937603365   0.460124517
O        0.876835492   0.604195854   0.796132821
O        0.395108029   0.271738357   0.796160553
O        0.727286915   0.123086617   0.794927926
O        0.395559452   0.122414203   0.794136509
O        0.727581099   0.605126836   0.796816061
O        0.877203524   0.272639602   0.793884890
O        0.540232976   0.930982175   0.127030348
O        0.070550126   0.608469070   0.104552924
O        0.395069448   0.460155654   0.109669623
O        0.063637212   0.458063480   0.130186643
O        0.396412346   0.939626218   0.131934535
O        0.540461559   0.610908558   0.126995524
H        0.001253242  -0.003041812   0.923698184
H        0.666564092   0.335535624   0.259493972
H        0.314703497   0.658081627   0.582326673
H        0.270079833   0.133839228   0.395778875
H        0.866256862   0.134235097   0.396959021
H        0.862760350   0.728885670   0.396310865
H        0.933808757   0.466463097   0.729539792
H        0.532863052   0.466840714   0.730104297
H        0.532596743   0.064497013   0.731680516
H        0.603757666   0.801762295   0.068519959
H        0.216004704   0.796718378   0.061454138
H        0.203493854   0.419526344   0.062003654
