# Supplementary material for: Theoretical OH stretching vibrations in dravite
Source: Copernicus journal article supplement (doi:10.5194/ejm-34-239-2022), 2022-04-13
Supplement: Supplementary file 3 [file ejm-34-239-2022-supplement.zip › ejm-2021-65-supplement-version2/supplementary_files/Structure_and_eigendisplacement_files/dravite_models_with_YZ_inversion/dravite_inver_2_3_PBE.cif]

#======================================================================

# CRYSTAL DATA

#----------------------------------------------------------------------

data_VESTA_phase_1


_pd_phase_name                         
_cell_length_a 16.1067867
_cell_length_b 16.1067867
_cell_length_c 7.27903080
_cell_angle_alpha                      90
_cell_angle_beta                       90
_cell_angle_gamma                      120
_symmetry_space_group_name_H-M         'P1'
_symmetry_Int_Tables_number            1

loop_
_symmetry_equiv_pos_as_xyz
   'x, y, z'

loop_
   _atom_site_label
   _atom_site_fract_x
   _atom_site_fract_y
   _atom_site_fract_z
Na      -0.002310889  -0.003214866   0.274395990
Na       0.669072430   0.338856209   0.610057968
Na       0.343414943   0.673176888   0.940708353
Mg       0.126425391   0.063389497   0.645447612
Mg       0.936861572   0.063483583   0.646487775
Mg       0.936654283   0.873770767   0.640620109
Mg       0.794178192   0.398112805   0.979305008
Mg       0.604000760   0.398395045   0.980442104
Mg       0.604157477   0.208119958   0.981099581
Mg       0.462688873   0.730280488   0.316538469
Al       0.269358292   0.731176654   0.320093153
Al       0.269157443   0.538359768   0.317046306
Al       0.298653796   0.261121506   0.630963281
Al       0.737702688   0.036558819   0.632579004
Al       0.962718494   0.702300342   0.629589520
Al       0.738307366   0.702290372   0.634284340
Al       0.962180615   0.260928869   0.629231683
Al       0.298773522   0.036589989   0.630579356
Al       0.966571288   0.596958312   0.963121281
Al       0.405935378   0.369546191   0.963073102
Al       0.629440369   0.034561370   0.967663910
Al       0.405730896   0.036458417   0.965470036
Al       0.629567371   0.597644239   0.968559222
Al       0.964645370   0.370664986   0.960696027
Al       0.631105187   0.927320787   0.301721754
Mg       0.071117640   0.702761614   0.297399685
Al       0.298417986   0.367490828   0.298214293
Al       0.069950890   0.368158347   0.296430841
Al       0.297938268   0.929250248   0.298876505
Mg       0.630562176   0.703656062   0.302199951
Si       0.191596603   0.189703098   0.014016499
Si       0.807927243   0.001602705   0.016991958
Si       0.996865824   0.806294822   0.011810011
Si       0.809345550   0.806996551   0.014813857
Si       0.997965731   0.190839355   0.013878854
Si       0.192192848   0.000173431   0.014319378
Si       0.859021200   0.522393513   0.351559173
Si       0.474935006   0.334152013   0.349259847
Si       0.664652837   0.140606918   0.350242577
Si       0.476191750   0.140847389   0.349960989
Si       0.663284838   0.522539027   0.354168473
Si       0.859857032   0.334762973   0.347501265
Si       0.526145172   0.856630956   0.689333040
Si       0.145855426   0.669097923   0.687143427
Si       0.330840912   0.474362330   0.687288376
Si       0.143702778   0.474109776   0.684731473
Si       0.331759167   0.856193018   0.689897602
Si       0.523244714   0.667475712   0.689737549
B        0.110820501   0.221708905   0.471450264
B        0.780249500   0.890641006   0.481191227
B        0.110474614   0.890122259   0.477848539
B        0.777479196   0.555267923   0.810749622
B        0.447040195   0.223320086   0.805690915
B        0.776311959   0.223252095   0.806054894
B        0.441404447   0.887085305   0.148306781
B        0.115801491   0.556997357   0.135069952
B        0.438204236   0.553725138   0.136690676
O        0.001283561   0.001884933   0.792842693
O        0.667200712   0.333892381   0.128027268
O        0.324216167   0.660837367   0.450713558
O        0.062879244   0.125964306   0.497046389
O        0.877752703   0.941704175   0.496239328
O        0.064769025   0.941532562   0.494844977
O        0.729164420   0.458362110   0.835388847
O        0.543123683   0.271900241   0.831600141
O        0.728916058   0.272067757   0.831874714
O        0.387153003   0.788588442   0.184127098
O        0.214589640   0.605360868   0.182672408
O        0.382136474   0.596208699   0.177082853
O        0.270743769   0.135493358   0.529556453
O        0.865358315   0.136246759   0.530103378
O        0.864860666   0.729821465   0.530325258
O        0.936985391   0.467321873   0.861317096
O        0.529950257   0.466524951   0.864250195
O        0.530990708   0.062678278   0.866634084
O        0.597036784   0.806458308   0.196762019
O        0.215358036   0.799121817   0.195692402
O        0.204726155   0.409969747   0.198171097
O        0.093102121   0.186965893   0.084627832
O        0.812072070   0.906627596   0.084756390
O        0.095155363   0.903793478   0.083225559
O        0.754427862   0.508462621   0.411762982
O        0.475363092   0.237345213   0.420285005
O        0.762038646   0.238375801   0.416507980
O        0.424961654   0.849336937   0.760835883
O        0.155020475   0.575823327   0.757073505
O        0.420495030   0.574695739   0.764974058
O        0.183538421   0.090971508   0.103272648
O        0.906671484   0.093850072   0.105747124
O        0.911040959   0.821518186   0.105867972
O        0.851610507   0.423391370   0.441714175
O        0.572203971   0.422484961   0.443033189
O        0.575790107   0.151695611   0.440574055
O        0.517238019   0.759014408   0.785267282
O        0.241593298   0.759931349   0.786615167
O        0.237133977   0.474883651   0.780583558
O        0.199167902   0.190255135   0.792601339
O        0.810450334   0.011130804   0.795660104
O        0.989935182   0.802797778   0.790923187
O        0.813322243   0.802969784   0.794059945
O        0.991672488   0.191167480   0.792394409
O        0.200426137   0.009954225   0.793177529
O        0.870287389   0.521545917   0.130628689
O        0.475260643   0.340694443   0.127988225
O        0.655251413   0.133134093   0.129209852
O        0.477102379   0.135031234   0.128575946
O        0.650592762   0.521532506   0.133373455
O        0.867518354   0.342866948   0.126439856
O        0.529708124   0.855395402   0.467967743
O        0.159927662   0.677557021   0.466002229
O        0.319963277   0.472738457   0.462407537
O        0.152003282   0.473080790   0.459580365
O        0.322605379   0.848411733   0.465744720
O        0.518936945   0.670329646   0.471392418
O        0.283688907   0.285334959   0.099146796
O        0.713191847   0.000545918   0.101934955
O        0.995612839   0.711639950   0.087653254
O        0.716303367   0.712510076   0.092412921
O        1.003042519   0.287774381   0.096833517
O        0.285736489  -0.000924496   0.099761823
O        0.946914125   0.615451600   0.444089518
O        0.380547392   0.334558368   0.433148345
O        0.664480728   0.047010981   0.436136142
O        0.382635506   0.045859425   0.434736350
O        0.669262489   0.615371823   0.448245132
O        0.954616760   0.335117099   0.431103898
O        0.617986572   0.952519608   0.771153082
O        0.048492383   0.663835026   0.758949802
O        0.335288328   0.381831870   0.762276697
O        0.046475310   0.382483572   0.759894870
O        0.335402383   0.952551442   0.766207668
O        0.616061963   0.664301560   0.767392833
O        0.211314092   0.273744227   0.460113286
O        0.728702503   0.940697221   0.464524644
O        0.062754897   0.791985199   0.476446876
O        0.729798248   0.792565530   0.481732040
O        0.062692405   0.274046842   0.458785806
O        0.212370533   0.938858955   0.461178211
O        0.877516674   0.604979769   0.796683030
O        0.394950041   0.271651358   0.793905897
O        0.726635366   0.123054368   0.795209178
O        0.396153949   0.122829082   0.793718787
O        0.727946708   0.605404102   0.800910358
O        0.876898011   0.272160090   0.792857892
O        0.539939250   0.934351461   0.129934528
O        0.070670719   0.607121657   0.104173193
O        0.391040532   0.453651613   0.129912815
O        0.066831848   0.457305641   0.125878333
O        0.395362152   0.939806983   0.132792480
O        0.533877327   0.606327193   0.107680304
H       -0.004673152  -0.008394737   0.923139449
H        0.671863723   0.343483282   0.258576258
H        0.317319135   0.657713599   0.582440348
H        0.268401480   0.133960734   0.396046011
H        0.865384994   0.133411816   0.396622170
H        0.862517511   0.727448681   0.396979837
H        0.933570358   0.466396627   0.727826452
H        0.532402440   0.466709262   0.730748215
H        0.532320119   0.064533901   0.733131757
H        0.598653413   0.806680656   0.063550349
H        0.215990107   0.796848061   0.061849060
H        0.206224149   0.412122476   0.063987234
