# Supplementary material for: Theoretical OH stretching vibrations in dravite
Source: Copernicus journal article supplement (doi:10.5194/ejm-34-239-2022), 2022-04-13
Supplement: Supplementary file 3 [file ejm-34-239-2022-supplement.zip › ejm-2021-65-supplement-version2/supplementary_files/Structure_and_eigendisplacement_files/dravite_models_with_YZ_inversion/dravite_inver_2_4_PBE.cif]

#======================================================================

# CRYSTAL DATA

#----------------------------------------------------------------------

data_VESTA_phase_1


_pd_phase_name                         
_cell_length_a 16.1067867
_cell_length_b 16.1067867
_cell_length_c 7.27903080
_cell_angle_alpha                      90
_cell_angle_beta                       90
_cell_angle_gamma                      120
_symmetry_space_group_name_H-M         'P1'
_symmetry_Int_Tables_number            1

loop_
_symmetry_equiv_pos_as_xyz
   'x, y, z'

loop_
   _atom_site_label
   _atom_site_fract_x
   _atom_site_fract_y
   _atom_site_fract_z
Na      -0.002352101  -0.003489739   0.274365771
Na       0.669570947   0.332799015   0.610686645
Na       0.343277740   0.675282817   0.940736822
Mg       0.126475970   0.063903505   0.645143014
Mg       0.935973320   0.062888385   0.642121830
Mg       0.937343777   0.874007269   0.644256187
Mg       0.794145095   0.397823848   0.979972236
Mg       0.604005557   0.396643689   0.979362293
Mg       0.603971931   0.206216312   0.981845030
Mg       0.462606617   0.731909195   0.317003077
Al       0.269816728   0.731969045   0.320538823
Al       0.268935324   0.538559392   0.316495950
Al       0.298797478   0.261102820   0.629592221
Al       0.736867514   0.035553071   0.635428594
Al       0.963152663   0.702344556   0.629862242
Al       0.738638081   0.701996252   0.631921357
Al       0.961968382   0.260678106   0.629278435
Al       0.298678989   0.036386770   0.631742584
Al       0.966503363   0.596774087   0.963400461
Al       0.405623674   0.369179481   0.962501759
Al       0.629222282   0.032299878   0.970180680
Al       0.405966990   0.036297993   0.966004477
Al       0.629773285   0.595420040   0.966257949
Al       0.964809467   0.370628356   0.960561531
Mg       0.630494777   0.926600061   0.302550597
Mg       0.071920926   0.703570359   0.297264475
Al       0.297985199   0.367455773   0.297055761
Al       0.069221164   0.368125823   0.296594415
Al       0.298459953   0.929600870   0.299771556
Al       0.631206268   0.703924890   0.301124348
Si       0.192524382   0.190482974   0.013308845
Si       0.809335165   0.004099468   0.015492413
Si       0.995670989   0.805870894   0.012489432
Si       0.807722154   0.807995227   0.016625624
Si       0.999098640   0.191460244   0.013025402
Si       0.191316213   0.000060262   0.014717570
Si       0.858868741   0.524540558   0.351086874
Si       0.475070486   0.335135052   0.348656933
Si       0.664839290   0.141545315   0.354929009
Si       0.476070041   0.141680399   0.350478907
Si       0.663113626   0.523419265   0.349638383
Si       0.860186614   0.337067435   0.348179310
Si       0.523896346   0.855564253   0.691383719
Si       0.145438758   0.669323888   0.687031296
Si       0.331391759   0.474533016   0.684909249
Si       0.144192095   0.474823973   0.684416431
Si       0.331400850   0.855903978   0.691979166
Si       0.525756106   0.668920161   0.687849271
B        0.110651785   0.221897909   0.469913695
B        0.780158025   0.890172076   0.481222279
B        0.110718312   0.890592385   0.478962882
B        0.777182347   0.554076599   0.807495960
B        0.447008060   0.223230348   0.805512800
B        0.776675156   0.222473919   0.809539102
B        0.439752702   0.885332523   0.140017825
B        0.115840980   0.556808665   0.135130623
B        0.440187138   0.553821139   0.145243157
O        0.001173466   0.001950411   0.792026499
O        0.666926714   0.333776647   0.127889240
O        0.324206718   0.659569092   0.450948418
O        0.062885236   0.126109232   0.494967708
O        0.877677124   0.936950225   0.496009129
O        0.064758186   0.941719790   0.496170083
O        0.728714024   0.457427922   0.832438631
O        0.543095902   0.271414083   0.831322460
O        0.729479191   0.271745255   0.835303095
O        0.384011644   0.786645979   0.181502052
O        0.214690991   0.604972594   0.182161585
O        0.385616064   0.597584643   0.180661434
O        0.270747014   0.135810010   0.529373043
O        0.867072763   0.137627754   0.529681361
O        0.863172860   0.729590646   0.530503097
O        0.937080345   0.467906268   0.861588472
O        0.530354543   0.467942856   0.864733903
O        0.530606616   0.063700123   0.866211770
O        0.596582849   0.790311014   0.196230780
O        0.214732567   0.799325316   0.196847170
O        0.205664542   0.410661919   0.196977994
O        0.095498741   0.189950852   0.084062733
O        0.812000015   0.907522965   0.085011042
O        0.092409841   0.904860670   0.083433323
O        0.756317144   0.515557094   0.414591221
O        0.475230422   0.238674521   0.420150250
O        0.760906540   0.242957341   0.415258560
O        0.422226690   0.846558553   0.768659975
O        0.154823040   0.576186382   0.757023103
O        0.423606507   0.574717683   0.756301882
O        0.183704238   0.091677864   0.103078917
O        0.910485548   0.093218694   0.105797992
O        0.907055287   0.816991885   0.106112696
O        0.851496105   0.425966665   0.441706345
O        0.572236896   0.425194359   0.441014400
O        0.576088839   0.155026096   0.442148908
O        0.517444744   0.757531635   0.785734655
O        0.239609617   0.760445780   0.787804660
O        0.239417546   0.477919693   0.778763577
O        0.199910846   0.190773397   0.791945381
O        0.814117873   0.013094923   0.794792059
O        0.988441058   0.802065137   0.791605878
O        0.809092126   0.801151213   0.795241320
O        0.993083581   0.191822288   0.791561462
O        0.199702446   0.009667735   0.793512754
O        0.868853304   0.522624926   0.129987679
O        0.476267812   0.342303182   0.127401460
O        0.651738556   0.130457159   0.134243684
O        0.475934748   0.135519005   0.129079946
O        0.654148570   0.522134583   0.128469888
O        0.868667686   0.345003335   0.127190214
O        0.519711920   0.847923053   0.473188768
O        0.159918357   0.677357180   0.465957851
O        0.320497993   0.472799132   0.460316753
O        0.152308100   0.473140000   0.459264446
O        0.322271334   0.848220321   0.467676268
O        0.529304930   0.673484600   0.466450218
O        0.285104126   0.286138238   0.098119419
O        0.716959118   0.005985446   0.094386807
O        0.996301209   0.712055202   0.087164009
O        0.712673476   0.713787530   0.100928936
O        1.002753702   0.287690377   0.097016779
O        0.284292439  -0.001690948   0.100486047
O        0.947499491   0.617067365   0.442886374
O        0.380779990   0.335632903   0.432467335
O        0.667850740   0.053231023   0.449875266
O        0.382584003   0.046661049   0.435590710
O        0.665180261   0.618106275   0.434603037
O        0.954548400   0.336409172   0.432076638
O        0.616912444   0.951740213   0.769168438
O        0.047613844   0.663460719   0.758361201
O        0.335287429   0.382175791   0.762050161
O        0.047560988   0.383041041   0.760495038
O        0.335287824   0.952775655   0.766555630
O        0.617273083   0.664676057   0.769727193
O        0.211376370   0.273904015   0.458906762
O        0.730343178   0.938603760   0.482377552
O        0.062596890   0.792360580   0.477372664
O        0.727976813   0.788826536   0.464137966
O        0.062973339   0.274627958   0.457832838
O        0.212363757   0.939074256   0.461972801
O        0.876913638   0.604817773   0.795823816
O        0.395763884   0.272706847   0.792788187
O        0.727732595   0.123141395   0.800535615
O        0.395266686   0.123026474   0.794646770
O        0.726876736   0.604309821   0.795665352
O        0.877625570   0.272689521   0.794011441
O        0.535336343   0.927652784   0.108789753
O        0.070277770   0.606668606   0.105090914
O        0.392133928   0.454636930   0.128943329
O        0.067076961   0.457220915   0.125600096
O        0.394633145   0.939846360   0.133937213
O        0.538587266   0.604493293   0.128341330
H       -0.004031707  -0.000386795   0.923399419
H        0.669420797   0.334786912   0.259570509
H        0.316569869   0.656794845   0.582506659
H        0.268432192   0.133626420   0.395875894
H        0.864308977   0.135397570   0.396283597
H        0.863518730   0.730488424   0.396968416
H        0.933563638   0.467126502   0.728115732
H        0.532317403   0.467509512   0.731202259
H        0.532421377   0.065266169   0.732733026
H        0.597803009   0.791385799   0.062990937
H        0.216202893   0.797502199   0.062980965
H        0.206350908   0.412425982   0.062833701
