# Supplementary material for: Theoretical OH stretching vibrations in dravite
Source: Copernicus journal article supplement (doi:10.5194/ejm-34-239-2022), 2022-04-13
Supplement: Supplementary file 3 [file ejm-34-239-2022-supplement.zip › ejm-2021-65-supplement-version2/supplementary_files/Structure_and_eigendisplacement_files/dravite_models_with_YZ_inversion/dravite_inver_2_5_PBE.cif]

#======================================================================

# CRYSTAL DATA

#----------------------------------------------------------------------

data_VESTA_phase_1


_pd_phase_name                         
_cell_length_a 16.1067867
_cell_length_b 16.1067867
_cell_length_c 7.27903080
_cell_angle_alpha                      90
_cell_angle_beta                       90
_cell_angle_gamma                      120
_symmetry_space_group_name_H-M         'P1'
_symmetry_Int_Tables_number            1

loop_
_symmetry_equiv_pos_as_xyz
   'x, y, z'

loop_
   _atom_site_label
   _atom_site_fract_x
   _atom_site_fract_y
   _atom_site_fract_z
Na       0.000634128  -0.003159016   0.274162362
Na       0.666378522   0.332783049   0.610628201
Na       0.335966364   0.674180025   0.941461903
Mg       0.126186339   0.063336737   0.642560355
Mg       0.936551781   0.063531928   0.644871946
Mg       0.936692696   0.873902901   0.644808525
Mg       0.793676890   0.397882943   0.980221060
Mg       0.603630458   0.396858915   0.979249605
Mg       0.602448972   0.206266761   0.981300058
Mg       0.461468728   0.731040223   0.317127375
Al       0.269884401   0.731840200   0.322416545
Al       0.268381516   0.538114993   0.316770446
Al       0.298145573   0.260372255   0.629384941
Al       0.737720753   0.037148618   0.633491725
Al       0.964198867   0.702397131   0.630771868
Al       0.739480051   0.702129873   0.631684857
Al       0.961964234   0.261466226   0.630124607
Al       0.297782688   0.035315532   0.631672761
Al       0.966441510   0.596930784   0.966065860
Al       0.405281197   0.369194116   0.961770243
Al       0.628248050   0.033836788   0.966658235
Al       0.403417523   0.034741074   0.967794786
Al       0.629519091   0.595680952   0.964211279
Al       0.964392127   0.370700157   0.962030558
Al       0.631099235   0.928465508   0.301948360
Mg       0.073391773   0.703749197   0.298728660
Al       0.297957185   0.367507065   0.296822970
Al       0.068897593   0.368015866   0.297672857
Mg       0.296475584   0.927171589   0.299212827
Al       0.631976485   0.704306459   0.300492820
Si       0.191459306   0.190681311   0.012935362
Si       0.808568653   0.002239618   0.016265957
Si       0.997410915   0.806519241   0.013670119
Si       0.808922017   0.807863526   0.016106600
Si       0.997780715   0.191325940   0.013794762
Si       0.192829682   0.002330943   0.012837832
Si       0.857741550   0.523504997   0.352159956
Si       0.475900873   0.336944446   0.348629724
Si       0.664645321   0.140614268   0.350544039
Si       0.476831857   0.142745809   0.353476836
Si       0.663193567   0.524898206   0.349053828
Si       0.859009829   0.335477185   0.348530556
Si       0.526393200   0.856954174   0.688669077
Si       0.146211734   0.668890933   0.691130162
Si       0.331552394   0.474656830   0.684025309
Si       0.144026848   0.474188807   0.686236567
Si       0.332246221   0.854471123   0.693363906
Si       0.526126556   0.668603440   0.684511343
B        0.110215045   0.222039016   0.470291511
B        0.779032709   0.890436299   0.474366852
B        0.109100662   0.890945954   0.484801269
B        0.777534772   0.554319828   0.807948599
B        0.446134168   0.222559078   0.807210366
B        0.776368216   0.223178965   0.807466687
B        0.441755182   0.885058591   0.139965666
B        0.114741936   0.555450342   0.137276881
B        0.440132778   0.555066763   0.144061911
O       -0.000607740   0.001803377   0.792567836
O        0.666932480   0.333929072   0.127662928
O        0.325484316   0.658391573   0.452174910
O        0.062031377   0.126233721   0.495139693
O        0.875234927   0.938558543   0.497088860
O        0.059817480   0.939888575   0.496198375
O        0.728415505   0.457667533   0.832626279
O        0.542629750   0.271830666   0.832443158
O        0.728665250   0.271536795   0.833699194
O        0.388250385   0.786451114   0.182332743
O        0.213700475   0.603108479   0.183580197
O        0.385229094   0.598168327   0.179668242
O        0.270312252   0.137873053   0.528988641
O        0.864933382   0.135968528   0.529880694
O        0.862582860   0.729699642   0.530651223
O        0.936358464   0.467104585   0.862620351
O        0.530570608   0.468913401   0.863940059
O        0.532916869   0.063918880   0.864867994
O        0.601988061   0.800763362   0.202303998
O        0.211721725   0.787733883   0.190630743
O        0.205449262   0.410387854   0.197394697
O        0.093661803   0.189322127   0.084259653
O        0.812653146   0.907175826   0.085956856
O        0.093670566   0.905984149   0.082345380
O        0.755578986   0.516124792   0.414795844
O        0.483546977   0.244565806   0.418426804
O        0.763048245   0.237452021   0.416693032
O        0.426281239   0.847882285   0.766847109
O        0.154567262   0.574880982   0.761762537
O        0.424028358   0.575532739   0.753700005
O        0.181268082   0.091889687   0.103626141
O        0.907006754   0.093758200   0.105546837
O        0.907563366   0.816923987   0.106500798
O        0.845936008   0.422088022   0.440385116
O        0.571045066   0.429213504   0.441994040
O        0.578368295   0.154785717   0.441505684
O        0.520657925   0.759302672   0.778663542
O        0.242064150   0.758047533   0.793729163
O        0.239600554   0.477422959   0.779213940
O        0.198333772   0.191731970   0.791496941
O        0.810317411   0.010476182   0.794904172
O        0.987761675   0.801598497   0.792988226
O        0.808783674   0.801615781   0.794688352
O        0.990584686   0.190862109   0.792419597
O        0.198194158   0.012314517   0.792136727
O        0.867826963   0.522119763   0.131006589
O        0.476582887   0.343853544   0.127259952
O        0.655374800   0.131937850   0.129760247
O        0.478143468   0.134284273   0.132013784
O        0.653892339   0.523383099   0.127985476
O        0.867466249   0.343936350   0.127680121
O        0.530703168   0.854356474   0.466939597
O        0.159288278   0.674964818   0.470506528
O        0.320834771   0.472984553   0.459516422
O        0.152041940   0.472370343   0.461147424
O        0.324784230   0.840380923   0.473183170
O        0.529789860   0.674450540   0.462661114
O        0.284258963   0.286946670   0.097087052
O        0.713373643  -0.000861468   0.102326236
O        0.996193005   0.711915370   0.089314027
O        0.712262740   0.715081403   0.099879257
O        1.001346372   0.287043744   0.098590554
O        0.287727456   0.005002529   0.090103351
O        0.946873365   0.614794700   0.445824189
O        0.380268304   0.335042764   0.431566410
O        0.664338270   0.046618084   0.436468956
O        0.385426995   0.053471246   0.446802066
O        0.666434454   0.620523838   0.432600469
O        0.954274627   0.336992328   0.433524999
O        0.618876277   0.952548624   0.769324782
O        0.048548438   0.663768695   0.762399785
O        0.335883232   0.382756803   0.761342542
O        0.047237346   0.382217766   0.762135302
O        0.335806516   0.951659376   0.764027196
O        0.617597753   0.664568601   0.766438482
O        0.210673936   0.274510040   0.458558825
O        0.727822219   0.939678718   0.463724583
O        0.060609876   0.791643852   0.477231194
O        0.727128751   0.790100710   0.463615254
O        0.061720388   0.274222166   0.459090874
O        0.208393205   0.939787972   0.476999924
O        0.877101411   0.604722760   0.796903487
O        0.395230606   0.272683506   0.793626914
O        0.727502041   0.123030950   0.796354054
O        0.395304524   0.123169381   0.797208806
O        0.727347678   0.604906839   0.795673264
O        0.877016063   0.272629476   0.793872877
O        0.541975247   0.930396250   0.128688139
O        0.067399012   0.603314163   0.108125161
O        0.393454577   0.456031148   0.129027444
O        0.066443149   0.455739064   0.126804057
O        0.397973372   0.936931397   0.112740582
O        0.538976715   0.608536378   0.125871294
H        0.001820200  -0.000093847   0.924043365
H        0.666582267   0.334600237   0.259419572
H        0.312827492   0.654868132   0.582226830
H        0.269633460   0.135225237   0.395571982
H        0.864498112   0.134308504   0.396314910
H        0.864391176   0.730876976   0.397154314
H        0.933510003   0.467026051   0.729191789
H        0.532489589   0.467853497   0.730375401
H        0.533047163   0.065798333   0.731398604
H        0.603478371   0.802087434   0.068766911
H        0.215017398   0.785493133   0.057379242
H        0.205981333   0.412250435   0.063266685
