# Supplementary material for: Theoretical OH stretching vibrations in dravite
Source: Copernicus journal article supplement (doi:10.5194/ejm-34-239-2022), 2022-04-13
Supplement: Supplementary file 3 [file ejm-34-239-2022-supplement.zip › ejm-2021-65-supplement-version2/supplementary_files/Structure_and_eigendisplacement_files/dravite_models_with_YZ_inversion/dravite_inver_2_6_PBE.cif]

#======================================================================

# CRYSTAL DATA

#----------------------------------------------------------------------

data_VESTA_phase_1


_pd_phase_name                         
_cell_length_a 16.1067867
_cell_length_b 16.1067867
_cell_length_c 7.27903080
_cell_angle_alpha                      90
_cell_angle_beta                       90
_cell_angle_gamma                      120
_symmetry_space_group_name_H-M         'P1'
_symmetry_Int_Tables_number            1

loop_
_symmetry_equiv_pos_as_xyz
   'x, y, z'

loop_
   _atom_site_label
   _atom_site_fract_x
   _atom_site_fract_y
   _atom_site_fract_z
Na       0.000245753   0.000117322   0.274573028
Na       0.660892863   0.330448185   0.609603529
Na       0.338349411   0.669174406   0.941101658
Mg       0.126208172   0.063104405   0.637881022
Mg       0.936733992   0.063165271   0.647659302
Mg       0.936734623   0.873570827   0.647672443
Mg       0.791862055   0.395930534   0.980055312
Mg       0.602210553   0.396440437   0.979869866
Mg       0.602210313   0.205768266   0.979865180
Mg       0.460987499   0.730492947   0.316159212
Al       0.269256062   0.731404551   0.320169693
Al       0.269256350   0.537850518   0.320170308
Al       0.297913691   0.261134952   0.630114861
Al       0.738590890   0.037119959   0.632871910
Al       0.962862873   0.701255969   0.629563063
Al       0.738591497   0.701470430   0.632875585
Al       0.962863008   0.261607148   0.629558461
Al       0.297913001   0.036777804   0.630115717
Al       0.964164457   0.594367367   0.963786028
Al       0.403367897   0.368530510   0.964769963
Al       0.628432293   0.033683190   0.965339035
Al       0.403367315   0.034835799   0.964769782
Al       0.628432842   0.594748024   0.965341669
Al       0.964164743   0.369797073   0.963783079
Al       0.631326104   0.927848286   0.301177248
Al       0.071135738   0.702192281   0.298322918
Mg       0.297699500   0.368171300   0.297930190
Al       0.071136221   0.368942826   0.298318978
Mg       0.297699086   0.929527117   0.297930406
Al       0.631326318   0.703476162   0.301180630
Si       0.192588963   0.190124071   0.010679291
Si       0.809738512   0.002322509   0.017086464
Si       0.999179739   0.806622056   0.014968904
Si       0.809738823   0.807415958   0.017090889
Si       0.999179377   0.192557775   0.014962559
Si       0.192588681   0.002464258   0.010680910
Si       0.859408830   0.523895227   0.348574577
Si       0.478070384   0.336566469   0.352547184
Si       0.665623598   0.139920209   0.349361416
Si       0.478070243   0.141502409   0.352546422
Si       0.665623728   0.525702103   0.349365185
Si       0.859408893   0.335512712   0.348571489
Si       0.526323472   0.857189200   0.687088207
Si       0.143970554   0.669235663   0.688430529
Si       0.331603910   0.477050919   0.689467379
Si       0.143970619   0.474734127   0.688429228
Si       0.331603820   0.854551943   0.689466830
Si       0.526323508   0.669132849   0.687090093
B        0.109872773   0.220392461   0.477403093
B        0.779245056   0.889621849   0.476043129
B        0.109872281   0.889479371   0.477408506
B        0.776523831   0.553285773   0.806263131
B        0.445397436   0.222698388   0.808757824
B        0.776523808   0.223237756   0.806258210
B        0.440333504   0.884162110   0.136943175
B        0.112519245   0.556259443   0.147484209
B        0.440333907   0.556170139   0.136943803
O       -0.000474052  -0.000233336   0.793345483
O        0.666947671   0.333472084   0.127822085
O        0.322738572   0.661368685   0.451394514
O        0.058293060   0.123278319   0.494420406
O        0.875350110   0.937674092   0.500121235
O        0.058292182   0.935013272   0.494429448
O        0.728296124   0.457056124   0.831786779
O        0.542105214   0.271052337   0.834231957
O        0.728296132   0.271239720   0.831782077
O        0.385803063   0.785517601   0.179291513
O        0.211162218   0.605580880   0.187957446
O        0.385803519   0.600284426   0.179291988
O        0.270286447   0.135142811   0.528236447
O        0.864835475   0.135644272   0.530590745
O        0.864835833   0.729191359   0.530596907
O        0.937587333   0.468793930   0.864465637
O        0.532803902   0.469445728   0.863320063
O        0.532803110   0.063356420   0.863317822
O        0.602301864   0.801149714   0.202713309
O        0.200727842   0.784173184   0.195366942
O        0.200728653   0.416554141   0.195365740
O        0.095590120   0.191677704   0.082902608
O        0.816251292   0.908125855   0.086466180
O        0.095590991   0.903912180   0.082910183
O        0.762509147   0.524158457   0.416530027
O        0.491244669   0.245621561   0.415047740
O        0.762509423   0.238349103   0.416524979
O        0.424402469   0.845854887   0.762204442
O        0.151303929   0.575651507   0.757367305
O        0.424402570   0.578546207   0.762206950
O        0.174657623   0.087328741   0.101390297
O        0.907703461   0.094569100   0.106310466
O        0.907703961   0.813135282   0.106317249
O        0.848950451   0.424474470   0.439494212
O        0.577352056   0.427948932   0.442397591
O        0.577352302   0.149401832   0.442395050
O        0.522633809   0.761316414   0.779676044
O        0.239658353   0.758512934   0.787307477
O        0.239657980   0.481144064   0.787306677
O        0.197022476   0.187058432   0.789797236
O        0.810263989   0.009689927   0.795649542
O        0.990097748   0.799304496   0.793737135
O        0.810264199   0.800573436   0.795654053
O        0.990097637   0.190793716   0.793730830
O        0.197021647   0.009962617   0.789798686
O        0.866616412   0.522611030   0.127459489
O        0.478626619   0.346501915   0.131226129
O        0.656470372   0.131894290   0.128411938
O        0.478626555   0.132123327   0.131225237
O        0.656470569   0.524574917   0.128415760
O        0.866616665   0.344004895   0.127456479
O        0.530041344   0.854600209   0.465191370
O        0.150765766   0.677086273   0.464069275
O        0.322051633   0.482591006   0.468843279
O        0.150766308   0.473678853   0.464068139
O        0.322051381   0.839459758   0.468842662
O        0.530041060   0.675438837   0.465193148
O        0.287812961   0.281902284   0.088776441
O        0.713199505  -0.002377399   0.101205657
O        1.001603609   0.713356195   0.098877862
O        0.713200282   0.715576348   0.101209894
O        1.001604109   0.288247465   0.098873193
O        0.287813144   0.005910192   0.088776766
O        0.954336428   0.617293644   0.433558536
O        0.385002909   0.331657510   0.444893864
O        0.666532988   0.046425333   0.433864468
O        0.385002569   0.053344343   0.444894092
O        0.666533532   0.620106536   0.433868186
O        0.954336818   0.337042428   0.433554542
O        0.618369785   0.953198392   0.767359626
O        0.047251026   0.664341377   0.764943317
O        0.335834035   0.384158031   0.760752916
O        0.047250606   0.382909267   0.764940739
O        0.335833799   0.951674993   0.760752320
O        0.618370045   0.665170912   0.767363043
O        0.208029646   0.270750203   0.476221742
O        0.727805340   0.938484151   0.464472437
O        0.061174825   0.787591425   0.460599632
O        0.727804909   0.789319830   0.464475943
O        0.061174895   0.273582672   0.460594801
O        0.208029157   0.937279031   0.476222342
O        0.877179131   0.603793630   0.793317065
O        0.395077020   0.272287248   0.796544810
O        0.728060310   0.123100640   0.795466890
O        0.395076656   0.122789025   0.796545335
O        0.728060573   0.604959403   0.795471081
O        0.877179160   0.273385658   0.793312140
O        0.540547137   0.929910699   0.127335597
O        0.063227233   0.605187984   0.129532472
O        0.394682481   0.460342225   0.108609823
O        0.063227710   0.458038999   0.129530667
O        0.394682009   0.934338626   0.108609827
O        0.540547642   0.610634439   0.127338330
H        0.012094902   0.006065467   0.922961332
H        0.657479678   0.328734462   0.258393664
H        0.317871202   0.658935319   0.583396027
H        0.273438690   0.136718792   0.394949961
H        0.865782028   0.133611909   0.397089461
H        0.865783373   0.732172381   0.397095822
H        0.934854556   0.467428078   0.730983730
H        0.533937744   0.467903604   0.729805056
H        0.533935787   0.066031018   0.729802685
H        0.603671909   0.801834050   0.069133922
H        0.203656204   0.784227223   0.061522958
H        0.203658069   0.419429407   0.061521865
