# Supplementary material for: Theoretical OH stretching vibrations in dravite
Source: Copernicus journal article supplement (doi:10.5194/ejm-34-239-2022), 2022-04-13
Supplement: Supplementary file 3 [file ejm-34-239-2022-supplement.zip › ejm-2021-65-supplement-version2/supplementary_files/Structure_and_eigendisplacement_files/dravite_models_with_YZ_inversion/dravite_inver_2_7_PBE.cif]

#======================================================================

# CRYSTAL DATA

#----------------------------------------------------------------------

data_VESTA_phase_1


_pd_phase_name                         
_cell_length_a 16.1067867
_cell_length_b 16.1067867
_cell_length_c 7.27903080
_cell_angle_alpha                      90
_cell_angle_beta                       90
_cell_angle_gamma                      120
_symmetry_space_group_name_H-M         'P1'
_symmetry_Int_Tables_number            1

loop_
_symmetry_equiv_pos_as_xyz
   'x, y, z'

loop_
   _atom_site_label
   _atom_site_fract_x
   _atom_site_fract_y
   _atom_site_fract_z
Na      -0.005638652  -0.002819129   0.273615323
Na       0.665967270   0.332983603   0.610929135
Na       0.347952273   0.673976406   0.939533940
Mg       0.126466898   0.063233089   0.643638720
Mg       0.936592474   0.063157063   0.644097459
Mg       0.936592209   0.873434694   0.644096635
Mg       0.792996810   0.396498411   0.978814705
Mg       0.604108761   0.397865095   0.981477795
Mg       0.604108437   0.206243114   0.981476603
Mg       0.463584638   0.731792239   0.311113536
Al       0.269950062   0.731742729   0.319737417
Al       0.269950503   0.538206301   0.319735627
Al       0.299233519   0.261807905   0.631687881
Al       0.736842359   0.034864254   0.635184994
Al       0.961915469   0.701817387   0.628696062
Al       0.736841759   0.701977754   0.635185000
Al       0.961915147   0.260096979   0.628696236
Al       0.299233185   0.037424574   0.631687950
Al       0.964732373   0.594930946   0.960173224
Al       0.406169867   0.369691285   0.964166848
Al       0.629578504   0.032365934   0.970670609
Al       0.406169129   0.036476821   0.964167521
Al       0.629578671   0.597212709   0.970671991
Al       0.964731698   0.369801198   0.960172566
Mg       0.630002993   0.925160155   0.301837936
Al       0.070310018   0.702559577   0.296349149
Al       0.299088835   0.367413391   0.299100701
Al       0.070309868   0.367749772   0.296347937
Al       0.299087933   0.931673667   0.299101225
Mg       0.630002552   0.704842289   0.301838560
Si       0.192310050   0.190705837   0.013687516
Si       0.809182508   0.002764427   0.016509105
Si       0.998778821   0.807454365   0.013588579
Si       0.809181923   0.806418488   0.016508570
Si       0.998779439   0.191324718   0.013588494
Si       0.192309910   0.001604456   0.013688090
Si       0.861372400   0.524376421   0.347398689
Si       0.476325229   0.335027824   0.350322311
Si       0.665590184   0.142106406   0.354529201
Si       0.476324773   0.141295986   0.350322593
Si       0.665590634   0.523483188   0.354530553
Si       0.861372015   0.336995080   0.347398478
Si       0.523260898   0.855307457   0.691159045
Si       0.143455661   0.668843871   0.683310038
Si       0.330730133   0.474764352   0.688897370
Si       0.143454644   0.474608332   0.683308165
Si       0.330730023   0.855964360   0.688898945
Si       0.523260073   0.667952998   0.691159012
B        0.111565196   0.221836243   0.470622662
B        0.781895563   0.890947714   0.488483888
B        0.111565118   0.889728280   0.470623104
B        0.776334284   0.554034061   0.808281183
B        0.446916770   0.223457504   0.806855330
B        0.776333617   0.222300202   0.808280068
B        0.438099559   0.885342667   0.137947509
B        0.114790328   0.557395064   0.144848067
B        0.438099739   0.552756429   0.137946769
O        0.002692772   0.001345855   0.792318482
O        0.667346963   0.333673097   0.127979499
O        0.319488318   0.659743385   0.451598364
O        0.063797721   0.126030545   0.495381874
O        0.880455876   0.940227459   0.497529623
O        0.063797550   0.937766348   0.495381147
O        0.729201692   0.457392261   0.833062617
O        0.542819619   0.271409385   0.833324526
O        0.729201012   0.271809387   0.833061023
O        0.381850707   0.786527950   0.177983524
O        0.213057926   0.606528666   0.187328816
O        0.381850657   0.595322157   0.177981363
O        0.270708063   0.135353601   0.529238569
O        0.867616781   0.138057415   0.530144575
O        0.867616852   0.729558837   0.530144326
O        0.938603320   0.469301587   0.862235123
O        0.530320963   0.466214564   0.865228903
O        0.530320747   0.064105531   0.865228186
O        0.590785845   0.795392762   0.185741238
O        0.204503390   0.794219280   0.198495944
O        0.204503605   0.410283785   0.198493654
O        0.095540360   0.190633692   0.084638543
O        0.814768633   0.907384590   0.083898852
O        0.095539186   0.904907319   0.084638130
O        0.760964234   0.516155406   0.415108193
O        0.473423622   0.236711249   0.420795920
O        0.760963108   0.244808416   0.415106982
O        0.420761389   0.846550809   0.766934054
O        0.150712785   0.575354748   0.751490277
O        0.420759032   0.574211147   0.766933524
O        0.182456190   0.091228315   0.102983481
O        0.910375207   0.093315940   0.106727113
O        0.910374380   0.817058880   0.106726302
O        0.858582738   0.429291024   0.440919921
O        0.576318207   0.421319509   0.441869519
O        0.576317700   0.154997075   0.441869474
O        0.515077468   0.757538724   0.789215564
O        0.237676678   0.759893645   0.780301112
O        0.237674010   0.477776201   0.780298529
O        0.199780478   0.190174155   0.792387652
O        0.814513011   0.013295309   0.795890980
O        0.993264938   0.801279043   0.792131373
O        0.814512131   0.801217972   0.795890437
O        0.993265144   0.191985237   0.792131335
O        0.199780642   0.009606945   0.792388323
O        0.868828790   0.523465890   0.126208845
O        0.476163588   0.341763550   0.129215256
O        0.653291961   0.131784071   0.133541898
O        0.476162922   0.134398945   0.129215378
O        0.653292124   0.521508037   0.133543374
O        0.868828124   0.345362526   0.126208560
O        0.517323366   0.847925397   0.473102905
O        0.151520109   0.678562637   0.458421700
O        0.319573973   0.472569345   0.463865708
O        0.151519883   0.472956008   0.458419885
O        0.319572392   0.847002651   0.463867475
O        0.517322741   0.669397198   0.473102789
O        0.285006381   0.284881170   0.100506536
O        0.717023731   0.005743690   0.094041096
O        1.003211999   0.714691369   0.096114666
O        0.717023357   0.711280422   0.094041278
O        1.003212248   0.288520755   0.096113973
O        0.285005787   0.000124511   0.100507087
O        0.955160613   0.619786933   0.430365629
O        0.382543795   0.336585505   0.435391077
O        0.668578227   0.054007762   0.449603097
O        0.382543431   0.045956548   0.435391126
O        0.668578079   0.614569661   0.449604445
O        0.955159875   0.335372179   0.430365142
O        0.616133907   0.951670836   0.769313619
O        0.046899016   0.663924449   0.760005793
O        0.334244201   0.381732306   0.764129567
O        0.046897181   0.382972300   0.760003911
O        0.334241434   0.952509138   0.764132008
O        0.616132612   0.664461723   0.769313627
O        0.212271988   0.273928603   0.460245051
O        0.731886384   0.940092549   0.482223258
O        0.063765048   0.789317858   0.458225310
O        0.731885159   0.791793548   0.482224420
O        0.063764887   0.274446331   0.458224813
O        0.212271883   0.938342911   0.460246408
O        0.877490333   0.604491051   0.793120925
O        0.395261702   0.272254978   0.794599459
O        0.727692403   0.123161916   0.800014235
O        0.395262294   0.123004960   0.794597913
O        0.727693166   0.604531196   0.800015840
O        0.877489548   0.272998601   0.793121034
O        0.533611337   0.930762155   0.109687572
O        0.066815880   0.607824555   0.125960851
O        0.389821689   0.452632465   0.130287676
O        0.066814985   0.458991127   0.125961363
O        0.389820805   0.937187891   0.130288249
O        0.533611543   0.602849316   0.109687624
H       -0.003109325  -0.001557953   0.923597168
H        0.667817867   0.333905622   0.259746456
H        0.342729063   0.671361789   0.576294794
H        0.270095921   0.135046845   0.395681577
H        0.864754367   0.134362365   0.396827218
H        0.864754886   0.730393415   0.396827229
H        0.935066796   0.467534194   0.728677364
H        0.532979779   0.467152501   0.731794603
H        0.532980368   0.065827684   0.731793869
H        0.590471476   0.795234979   0.052862609
H        0.206702594   0.794004943   0.064398167
H        0.206704624   0.412697941   0.064395907
