# Supplementary material for: Theoretical OH stretching vibrations in dravite
Source: Copernicus journal article supplement (doi:10.5194/ejm-34-239-2022), 2022-04-13
Supplement: Supplementary file 3 [file ejm-34-239-2022-supplement.zip › ejm-2021-65-supplement-version2/supplementary_files/Structure_and_eigendisplacement_files/dravite_models_with_YZ_inversion/dravite_inver_2_8_PBE.cif]

#======================================================================

# CRYSTAL DATA

#----------------------------------------------------------------------

data_VESTA_phase_1


_pd_phase_name                         
_cell_length_a 16.1067867
_cell_length_b 16.1067867
_cell_length_c 7.27903080
_cell_angle_alpha                      90
_cell_angle_beta                       90
_cell_angle_gamma                      120
_symmetry_space_group_name_H-M         'P1'
_symmetry_Int_Tables_number            1

loop_
_symmetry_equiv_pos_as_xyz
   'x, y, z'

loop_
   _atom_site_label
   _atom_site_fract_x
   _atom_site_fract_y
   _atom_site_fract_z
Na      -0.003007497  -0.003567166   0.274093149
Na       0.663171156   0.326451417   0.610937719
Na       0.344197325   0.675439529   0.939858306
Mg       0.126491494   0.063224222   0.639789968
Mg       0.936314691   0.063176696   0.642380058
Mg       0.937012376   0.873977591   0.648413452
Mg       0.792508131   0.396265692   0.979308307
Mg       0.603754424   0.396435970   0.979722730
Mg       0.602644791   0.204692022   0.982776327
Mg       0.462478120   0.732792485   0.314726523
Al       0.270349134   0.732244553   0.320515106
Al       0.268971639   0.538025689   0.317629307
Al       0.298796694   0.261015921   0.629238615
Al       0.736613278   0.035247292   0.636493545
Al       0.963100814   0.702058130   0.629087663
Al       0.738603191   0.702060441   0.632004217
Al       0.961621102   0.260482060   0.628756541
Al       0.298553742   0.035994061   0.632306778
Al       0.964527199   0.594815737   0.962750357
Al       0.405546375   0.369337496   0.962125098
Al       0.628425411   0.031674996   0.970755827
Al       0.403902600   0.034862567   0.966719885
Al       0.629658314   0.595380423   0.966360570
Al       0.964353137   0.369820708   0.960855593
Mg       0.629852430   0.926926343   0.303509013
Al       0.071917655   0.702823802   0.297845839
Al       0.298548762   0.367427914   0.296879851
Al       0.069258427   0.367651371   0.296552867
Mg       0.298193795   0.929694253   0.299707660
Al       0.631457086   0.704585033   0.301146440
Si       0.191866782   0.191653447   0.011735200
Si       0.809846923   0.003519512   0.015686062
Si       0.999363242   0.807546048   0.015187341
Si       0.808986985   0.807442077   0.017582649
Si       0.998586002   0.191961393   0.012870305
Si       0.193047189   0.003793407   0.011468665
Si       0.860076131   0.525211277   0.347764922
Si       0.477031826   0.337728326   0.349131456
Si       0.665685898   0.142281222   0.355394934
Si       0.476965191   0.143129248   0.353943850
Si       0.665472153   0.525470778   0.349121010
Si       0.860790847   0.337699711   0.348174240
Si       0.523552429   0.855290668   0.692770217
Si       0.143730293   0.669063605   0.687390352
Si       0.331487564   0.475150515   0.684986469
Si       0.143633860   0.474561589   0.683811000
Si       0.330997118   0.854071127   0.693152308
Si       0.526363284   0.669388646   0.687488091
B        0.110911696   0.222010145   0.468555440
B        0.780428922   0.890618444   0.482267263
B        0.110499212   0.890336023   0.478075501
B        0.776494130   0.553218689   0.805203827
B        0.446159414   0.222727678   0.807830085
B        0.776390637   0.222171949   0.809633668
B        0.438519948   0.883582211   0.129553126
B        0.113670050   0.555935609   0.145330113
B        0.440112625   0.554019686   0.145151140
O        0.001467653   0.002007955   0.791512654
O        0.667355420   0.334294947   0.128299799
O        0.321778962   0.657961244   0.450629179
O        0.062897398   0.126140938   0.492851679
O        0.877828414   0.937017871   0.498004863
O        0.059098005   0.935981863   0.495549529
O        0.728567624   0.456854014   0.830331829
O        0.542444092   0.271371264   0.834297602
O        0.728970299   0.271240726   0.835182916
O        0.383061003   0.784419318   0.177662415
O        0.212175095   0.604650339   0.186089464
O        0.385339599   0.597626810   0.180627359
O        0.270479562   0.137791743   0.528072634
O        0.867217180   0.137748901   0.529771893
O        0.865221841   0.729232496   0.530770768
O        0.938033787   0.469152329   0.863135051
O        0.530931883   0.468792631   0.864662001
O        0.532082172   0.064784445   0.865261721
O        0.597265664   0.790642419   0.196568307
O        0.200443942   0.783972012   0.196178064
O        0.205238750   0.411007598   0.196601031
O        0.096199701   0.193596866   0.083684880
O        0.815298776   0.907955976   0.085192251
O        0.094574409   0.906582392   0.083056041
O        0.761116555   0.521546492   0.416247911
O        0.480704390   0.243487883   0.419089436
O        0.762299648   0.243850056   0.416075774
O        0.421627914   0.844317699   0.772956448
O        0.151272700   0.575040004   0.754014008
O        0.423802904   0.575457413   0.755745961
O        0.178843090   0.091508767   0.101646075
O        0.910760705   0.093416984   0.105846538
O        0.907295876   0.812917567   0.106497456
O        0.853921603   0.428310589   0.440318964
O        0.574806096   0.428030109   0.441098324
O        0.579081542   0.158488679   0.442700370
O        0.518952017   0.757897052   0.786858384
O        0.237611750   0.758275999   0.789219270
O        0.239765551   0.479784873   0.778160225
O        0.198935113   0.191893538   0.790394160
O        0.814323271   0.012419560   0.794909154
O        0.991081033   0.800157124   0.793843874
O        0.810548794   0.800174222   0.796180549
O        0.992510419   0.191956199   0.791477194
O        0.197796852   0.011986965   0.790533339
O        0.866825617   0.523820850   0.126499670
O        0.477402783   0.344854466   0.127905899
O        0.653838294   0.130998673   0.134624857
O        0.477484299   0.133744050   0.132793310
O        0.656212779   0.523268779   0.127976498
O        0.868749551   0.346358117   0.127177693
O        0.519438456   0.847103975   0.474637887
O        0.150601456   0.676342690   0.462970042
O        0.320268951   0.472987749   0.460388529
O        0.151587895   0.472593289   0.458877855
O        0.321117304   0.838574791   0.472489378
O        0.529395309   0.673632841   0.466029132
O        0.285381905   0.286339409   0.097767836
O        0.717063076   0.004464179   0.094282040
O        1.003357349   0.714652582   0.097634940
O        0.713018628   0.714046442   0.100768071
O        1.001489439   0.287945559   0.097105395
O        0.287457697   0.006646009   0.090510501
O        0.954414239   0.619255510   0.431705195
O        0.382093483   0.337253477   0.432978468
O        0.668397223   0.053819815   0.450689155
O        0.385556664   0.053424997   0.447339896
O        0.666718591   0.619679094   0.433749901
O        0.955144617   0.337233185   0.432086397
O        0.616914412   0.951746701   0.768949094
O        0.046643370   0.663616969   0.763317166
O        0.335178347   0.382900282   0.762349125
O        0.047527269   0.382848205   0.761356837
O        0.334929519   0.951751520   0.761944693
O        0.617843259   0.664669284   0.769004747
O        0.211566673   0.274532697   0.457656266
O        0.730440316   0.938726046   0.482430962
O        0.062170569   0.788646436   0.460569201
O        0.728684537   0.789175659   0.465113924
O        0.062817549   0.274527360   0.457498181
O        0.208688625   0.938634356   0.476941691
O        0.877095015   0.604223479   0.792702984
O        0.395696178   0.273358915   0.793471487
O        0.728604486   0.123106497   0.801516121
O        0.394656955   0.123388563   0.797497042
O        0.727261942   0.604153706   0.794522101
O        0.877607030   0.273485605   0.793484483
O        0.535677586   0.926702740   0.109537741
O        0.063499602   0.604004445   0.128995169
O        0.391877792   0.454961992   0.128483223
O        0.066434614   0.457504530   0.125606769
O        0.391555265   0.933727114   0.109724593
O        0.538662115   0.604560089   0.128424347
H        0.004263996   0.006342533   0.923004219
H        0.664472925   0.328718844   0.259655696
H        0.323760620   0.660475329   0.582796017
H        0.271833343   0.136476559   0.394687188
H        0.863780132   0.135059087   0.396446957
H        0.866450430   0.733486619   0.397386683
H        0.934729776   0.468039581   0.729630666
H        0.533167996   0.468484417   0.731145497
H        0.533615674   0.066301927   0.731800604
H        0.598718893   0.792595686   0.063337614
H        0.204398247   0.784844654   0.062348762
H        0.206346137   0.412835903   0.062499719
