# Supplementary material for: Theoretical OH stretching vibrations in dravite
Source: Copernicus journal article supplement (doi:10.5194/ejm-34-239-2022), 2022-04-13
Supplement: Supplementary file 3 [file ejm-34-239-2022-supplement.zip › ejm-2021-65-supplement-version2/supplementary_files/Structure_and_eigendisplacement_files/dravite_models_with_YZ_inversion/dravite_inver_2_9_PBE.cif]

#======================================================================

# CRYSTAL DATA

#----------------------------------------------------------------------

data_VESTA_phase_1


_pd_phase_name                         
_cell_length_a 16.1067867
_cell_length_b 16.1067867
_cell_length_c 7.27903080
_cell_angle_alpha                      90
_cell_angle_beta                       90
_cell_angle_gamma                      120
_symmetry_space_group_name_H-M         'P1'
_symmetry_Int_Tables_number            1

loop_
_symmetry_equiv_pos_as_xyz
   'x, y, z'

loop_
   _atom_site_label
   _atom_site_fract_x
   _atom_site_fract_y
   _atom_site_fract_z
Na      -0.003202934   0.000589555   0.274328716
Na       0.662824083   0.329676261   0.610590407
Na       0.345199388   0.670420025   0.940479497
Mg       0.126574088   0.063772539   0.640072386
Mg       0.936341567   0.062492026   0.644597696
Mg       0.937125462   0.873342452   0.646405993
Mg       0.792549879   0.395914160   0.978605895
Mg       0.602695755   0.396227967   0.981230863
Mg       0.603852348   0.205573580   0.981045245
Mg       0.462288199   0.731409429   0.315813041
Al       0.269121285   0.731447215   0.317817034
Al       0.269867139   0.538440708   0.320778850
Al       0.298747173   0.262577154   0.631109219
Al       0.738013358   0.035586780   0.634599383
Al       0.961742215   0.701126402   0.628504557
Al       0.737316807   0.701159703   0.633524336
Al       0.962914834   0.260813503   0.629027863
Al       0.298705564   0.037664058   0.630615489
Al       0.964233262   0.594405743   0.960731428
Al       0.403926902   0.368784219   0.966067390
Al       0.629497157   0.031935996   0.968808969
Al       0.405825656   0.036085899   0.962711271
Al       0.628571063   0.594450188   0.967906362
Al       0.964580679   0.369622590   0.962630948
Mg       0.630562958   0.926057587   0.302084579
Al       0.069911304   0.702374380   0.296210042
Mg       0.297513101   0.368390241   0.298340540
Al       0.071449985   0.369223393   0.297860342
Al       0.299021622   0.931623401   0.298078389
Al       0.630340312   0.703023577   0.301962744
Si       0.194017593   0.190199908   0.011277476
Si       0.810517923   0.004051897   0.015792542
Si       0.997422296   0.806183557   0.013572930
Si       0.808378767   0.807393511   0.017442861
Si       1.000693744   0.192707326   0.014445967
Si       0.191065441   0.000251872   0.012434648
Si       0.860435142   0.524965767   0.347160998
Si       0.477089111   0.334773068   0.353335947
Si       0.666012408   0.140970052   0.353543748
Si       0.477107351   0.140150317   0.349833988
Si       0.665337602   0.524119653   0.350492512
Si       0.860427897   0.337022447   0.348181359
Si       0.523768238   0.855877870   0.689593377
Si       0.143076981   0.669329568   0.683862943
Si       0.331414906   0.477056064   0.691112302
Si       0.144154127   0.475422625   0.687484796
Si       0.330979466   0.855983941   0.687258582
Si       0.525871686   0.669421298   0.690654331
B        0.110456258   0.220511885   0.477226581
B        0.780324625   0.889263868   0.482448751
B        0.111083024   0.889338336   0.469896913
B        0.776034482   0.553032057   0.805879167
B        0.446197386   0.223328191   0.807989230
B        0.776765486   0.222392217   0.808119792
B        0.438000523   0.884150793   0.136583609
B        0.113617522   0.557681350   0.145342325
B        0.440338518   0.554908561   0.138813700
O        0.001555190  -0.000350857   0.791775196
O        0.667482199   0.333437129   0.127834840
O        0.321516849   0.662794051   0.450836261
O        0.059269376   0.123390452   0.494328830
O        0.877769202   0.935983977   0.498057358
O        0.062908633   0.936980235   0.494565078
O        0.728467663   0.456806120   0.831471520
O        0.542473987   0.270473959   0.834567294
O        0.728955243   0.271250833   0.832695858
O        0.381772058   0.785534383   0.176860318
O        0.212084731   0.607168733   0.186339277
O        0.386362704   0.599859239   0.181432898
O        0.270586452   0.133106862   0.528326206
O        0.867155742   0.137324711   0.530668781
O        0.865343602   0.729089039   0.530083187
O        0.938019331   0.469349567   0.862915463
O        0.532474055   0.468515513   0.864876020
O        0.530565005   0.063093642   0.864476040
O        0.597135529   0.790842235   0.197279487
O        0.204182207   0.794124103   0.197716615
O        0.201065007   0.417388341   0.195252709
O        0.097433951   0.191865235   0.083078420
O        0.815635944   0.908391728   0.085279625
O        0.093891999   0.903304000   0.083966718
O        0.763395166   0.524166297   0.416271887
O        0.480883628   0.238630921   0.418930155
O        0.760253801   0.243935787   0.415214454
O        0.420727278   0.845362852   0.764734525
O        0.151196072   0.576737642   0.754047567
O        0.424191585   0.577563506   0.765485049
O        0.178698353   0.088022696   0.101804988
O        0.911081394   0.094068392   0.106405329
O        0.906978226   0.813047243   0.105838765
O        0.853795751   0.428048414   0.439944146
O        0.578904820   0.423439642   0.441321713
O        0.575288043   0.149870470   0.442731690
O        0.519151352   0.759574038   0.786364053
O        0.237592014   0.760630863   0.779546071
O        0.239492826   0.481778371   0.787803227
O        0.198648476   0.186434643   0.790428625
O        0.814396275   0.012283947   0.795010792
O        0.990855442   0.799779447   0.792173109
O        0.810506223   0.800050042   0.796043024
O        0.992842611   0.191858886   0.793107649
O        0.198283516   0.006896501   0.791030949
O        0.867716684   0.523308223   0.126138453
O        0.478515983   0.345209794   0.132143256
O        0.653567196   0.130679742   0.132521727
O        0.476517903   0.132911575   0.128694832
O        0.656686816   0.523353404   0.129440175
O        0.867729239   0.344945261   0.126899258
O        0.518588727   0.848098629   0.471298773
O        0.151203798   0.678800727   0.458930170
O        0.321694937   0.482683095   0.470495764
O        0.150972883   0.474436435   0.463096158
O        0.319797127   0.846930648   0.462345208
O        0.529458345   0.674411472   0.469296757
O        0.288957267   0.281542933   0.090124759
O        0.716364356   0.003539519   0.092148803
O        1.001740688   0.713818078   0.096680970
O        0.713437584   0.714190193   0.102310222
O        1.003126950   0.288834649   0.097821908
O        0.284075004  -0.001354087   0.098915407
O        0.955086317   0.619241618   0.430905181
O        0.385794827   0.333358359   0.446481736
O        0.670545557   0.053221128   0.446720867
O        0.382063764   0.045732826   0.433940641
O        0.664763835   0.617349900   0.436718918
O        0.954460254   0.336506799   0.432447048
O        0.616456956   0.952332177   0.766869808
O        0.046402496   0.664266603   0.760480244
O        0.335148230   0.383624034   0.762024682
O        0.047563422   0.383704934   0.763961872
O        0.335090251   0.952587766   0.762577739
O        0.617971297   0.665369201   0.771219072
O        0.208818066   0.270348661   0.476582631
O        0.730308627   0.937427587   0.482896711
O        0.062476155   0.788645095   0.458287704
O        0.728569852   0.787922141   0.465027591
O        0.062554656   0.274220298   0.459746956
O        0.211538169   0.937209728   0.458816872
O        0.876889478   0.603960761   0.792229437
O        0.395695131   0.272416467   0.796292119
O        0.728303569   0.123049718   0.799503864
O        0.394811997   0.122530553   0.794824087
O        0.727432515   0.604338642   0.795795693
O        0.877733207   0.273307541   0.793646256
O        0.533858777   0.927705846   0.108174486
O        0.066248999   0.608836786   0.125585105
O        0.393057085   0.459074124   0.108676187
O        0.063606776   0.459554390   0.128903641
O        0.390586246   0.936687943   0.129308753
O        0.540137826   0.606445867   0.130506222
H        0.004547986   0.003774324   0.923278059
H        0.665600996   0.331290136   0.259527793
H        0.323270470   0.663328860   0.583075475
H        0.271741147   0.134946747   0.394884896
H        0.865589130   0.134953452   0.397220862
H        0.864746680   0.731787437   0.396631681
H        0.934890862   0.467338726   0.729396537
H        0.533464981   0.467564697   0.731394746
H        0.533371777   0.065459525   0.731002222
H        0.598361799   0.791365776   0.064016733
H        0.206130712   0.793852353   0.063599806
H        0.204291408   0.420417617   0.061413843
