# Supplementary material for: Theoretical OH stretching vibrations in dravite
Source: Copernicus journal article supplement (doi:10.5194/ejm-34-239-2022), 2022-04-13
Supplement: Supplementary file 3 [file ejm-34-239-2022-supplement.zip › ejm-2021-65-supplement-version2/supplementary_files/Structure_and_eigendisplacement_files/dravite_models_with_YZ_inversion/dravite_inver_3_1_PBE.cif]

#======================================================================

# CRYSTAL DATA

#----------------------------------------------------------------------

data_VESTA_phase_1


_pd_phase_name                         
_cell_length_a 16.1067867
_cell_length_b 16.1067867
_cell_length_c 7.27903080
_cell_angle_alpha                      90
_cell_angle_beta                       90
_cell_angle_gamma                      120
_symmetry_space_group_name_H-M         'P1'
_symmetry_Int_Tables_number            1

loop_
_symmetry_equiv_pos_as_xyz
   'x, y, z'

loop_
   _atom_site_label
   _atom_site_fract_x
   _atom_site_fract_y
   _atom_site_fract_z
Na       0.004219291   0.003869133   0.272884790
Na       0.670073729   0.336933352   0.610899101
Na       0.326057144   0.657996030   0.943318914
Mg       0.125741333   0.062868443   0.644197457
Mg       0.936374775   0.062806581   0.642197344
Mg       0.936784124   0.873025975   0.639791935
Mg       0.794674343   0.397098260   0.982305231
Mg       0.602119952   0.395770556   0.980693868
Mg       0.603616273   0.207475819   0.978672009
Al       0.462494172   0.730742615   0.320906663
Al       0.268000046   0.730324859   0.323871020
Al       0.268044779   0.538206931   0.326452008
Al       0.297196446   0.261461360   0.630396571
Al       0.739695325   0.038321807   0.627805651
Al       0.963232847   0.700544478   0.631764545
Al       0.738892638   0.700546769   0.629495922
Al       0.964392435   0.262795884   0.631941196
Al       0.297656827   0.037082746   0.628105293
Al       0.966042337   0.595781317   0.966439684
Al       0.402844176   0.369325980   0.966119059
Al       0.630508352   0.035865910   0.960233644
Al       0.405018962   0.035610324   0.961991829
Al       0.629531380   0.593757566   0.961521354
Al       0.966599690   0.370266391   0.967788464
Al       0.632382678   0.930175872   0.296129553
Mg       0.070364669   0.701614756   0.300130688
Mg       0.295689792   0.369590373   0.299149384
Mg       0.072757548   0.370128538   0.300427872
Al       0.297261825   0.928334032   0.297560938
Al       0.632194098   0.700655041   0.297692298
Si       0.193025096   0.190016218   0.013047581
Si       0.808509272   0.001281869   0.011955410
Si       0.995762851   0.805309470   0.011225821
Si       0.808238541   0.807449235   0.011794162
Si       0.997591894   0.190678788   0.012615824
Si       0.191477370  -0.000736607   0.013485143
Si       0.857322505   0.522666967   0.353586076
Si       0.474978889   0.333601985   0.351965482
Si       0.662664344   0.138350329   0.347519466
Si       0.475411497   0.138820541   0.347673465
Si       0.662356827   0.522633510   0.349000135
Si       0.857132335   0.333793765   0.353558843
Si       0.525817718   0.856482229   0.685885700
Si       0.146124387   0.669700881   0.694675668
Si       0.331591918   0.477514903   0.693416022
Si       0.146363830   0.477828631   0.696509606
Si       0.331330615   0.856056330   0.689155677
Si       0.525522046   0.669565685   0.688562936
B        0.108614703   0.218755516   0.485456551
B        0.777580529   0.888170586   0.468778708
B        0.109502398   0.888591191   0.477528101
B        0.777186570   0.553573189   0.808565534
B        0.445887143   0.223393096   0.806107857
B        0.777712682   0.223822366   0.807199376
B        0.443672043   0.885687549   0.147377021
B        0.116020054   0.559222119   0.132956462
B        0.444211504   0.559669804   0.139943559
O       -0.002254467  -0.002304398   0.790607540
O        0.665886244   0.332524218   0.127995453
O        0.338161242   0.671761865   0.451970042
O        0.059803320   0.120664842   0.496155601
O        0.873302464   0.936054497   0.492917941
O        0.063619561   0.939686428   0.494125354
O        0.728292336   0.457393637   0.835788751
O        0.542445725   0.270949518   0.831520768
O        0.728581045   0.271073663   0.833269590
O        0.394489646   0.786614556   0.190923911
O        0.216473034   0.609948915   0.190708085
O        0.396239196   0.611447815   0.189347407
O        0.270300640   0.132716538   0.528482155
O        0.861891422   0.132585708   0.527683806
O        0.862058545   0.728802385   0.527379537
O        0.935774439   0.468085744   0.864364614
O        0.532166412   0.469101420   0.862978554
O        0.530934167   0.061540748   0.862766478
O        0.587572861   0.794266400   0.197900502
O        0.216676325   0.798292464   0.196784868
O        0.213373663   0.426309499   0.192411891
O        0.093516639   0.186772989   0.081800224
O        0.807524715   0.903957348   0.083109464
O        0.093679831   0.902699471   0.082225688
O        0.758323146   0.521563320   0.416283095
O        0.481828312   0.238595437   0.415076976
O        0.756875631   0.236340577   0.415860863
O        0.424125411   0.846282035   0.756266269
O        0.156922784   0.579536220   0.774378355
O        0.424742306   0.580097940   0.765740114
O        0.182936347   0.089432002   0.103910923
O        0.907088215   0.089884031   0.103142408
O        0.907722314   0.818717424   0.101903984
O        0.840012318   0.419711733   0.441285017
O        0.574797829   0.423854431   0.441522677
O        0.571634530   0.143556044   0.440598586
O        0.523759668   0.762566034   0.782553399
O        0.241615050   0.762585320   0.791431483
O        0.241725716   0.481995910   0.797103864
O        0.198405287   0.185980813   0.792301820
O        0.807801864   0.007156657   0.790498294
O        0.987290517   0.800782377   0.790385498
O        0.807983430   0.800528605   0.790382545
O        0.987523440   0.186121672   0.791865785
O        0.199004336   0.006910002   0.792102054
O        0.868429061   0.522166830   0.132803927
O        0.477004668   0.345146713   0.130742222
O        0.654226446   0.131066424   0.126421736
O        0.476576873   0.131964754   0.126356401
O        0.654304461   0.523066771   0.128123581
O        0.867717544   0.344724279   0.132499429
O        0.526077628   0.847156164   0.461021262
O        0.161621127   0.678398097   0.473814816
O        0.325869565   0.486201229   0.472936318
O        0.160478621   0.485695027   0.475985769
O        0.323802812   0.848200211   0.464701517
O        0.526165718   0.679588227   0.463525328
O        0.287236104   0.284136776   0.088934682
O        0.711914008  -0.002408531   0.096093245
O        0.993477373   0.711024676   0.090425629
O        0.712985443   0.714503274   0.098014658
O        0.996445433   0.283758550   0.090034433
O        0.285005706  -0.003891343   0.096905764
O        0.947673312   0.613177754   0.448106202
O        0.383489234   0.331399064   0.444622002
O        0.662872396   0.043798071   0.430900606
O        0.380806081   0.044603881   0.431211531
O        0.661656226   0.617002001   0.433521184
O        0.947227359   0.333611611   0.448188864
O        0.617117803   0.953294795   0.760808187
O        0.048260451   0.664815588   0.762570785
O        0.336875268   0.384924068   0.762448611
O        0.048533387   0.384580030   0.764145534
O        0.337109465   0.953184631   0.763386467
O        0.617381271   0.664534967   0.762377934
O        0.207947508   0.269866099   0.478652670
O        0.724939379   0.936190904   0.457488338
O        0.061170857   0.790264989   0.477378052
O        0.724863619   0.787537583   0.458042984
O        0.060058252   0.269479271   0.477362354
O        0.211193400   0.936467870   0.459895617
O        0.876645568   0.604507554   0.797341837
O        0.395069005   0.272120855   0.796127469
O        0.726931312   0.122629362   0.792298832
O        0.395409812   0.122444310   0.792521271
O        0.727086962   0.604429451   0.794045057
O        0.877009130   0.271926396   0.797757746
O        0.541881315   0.932587641   0.126394718
O        0.071909766   0.611398212   0.107805983
O        0.396075553   0.464691248   0.109351792
O        0.069105103   0.462984230   0.110960718
O        0.395357011   0.935280505   0.129384497
O        0.543594708   0.611384918   0.127633877
H       -0.003059239  -0.003452188   0.922332188
H        0.668505426   0.334231531   0.259686355
H        0.335062867   0.667921587   0.584277511
H        0.267908859   0.133114254   0.395040801
H        0.865038945   0.134722803   0.394284289
H        0.863240657   0.727911204   0.393925294
H        0.933481379   0.466570389   0.730917940
H        0.532352447   0.465956407   0.729551166
H        0.532339989   0.065275490   0.729261455
H        0.585886469   0.792732206   0.063683171
H        0.215286435   0.794495467   0.062889148
H        0.214769661   0.430882173   0.058975538
