# Supplementary material for: Theoretical OH stretching vibrations in dravite
Source: Copernicus journal article supplement (doi:10.5194/ejm-34-239-2022), 2022-04-13
Supplement: Supplementary file 3 [file ejm-34-239-2022-supplement.zip › ejm-2021-65-supplement-version2/supplementary_files/Structure_and_eigendisplacement_files/dravite_models_with_YZ_inversion/dravite_inver_3_2_PBE.cif]

#======================================================================

# CRYSTAL DATA

#----------------------------------------------------------------------

data_VESTA_phase_1


_pd_phase_name                         
_cell_length_a 16.1067867
_cell_length_b 16.1067867
_cell_length_c 7.27903080
_cell_angle_alpha                      90
_cell_angle_beta                       90
_cell_angle_gamma                      120
_symmetry_space_group_name_H-M         'P1'
_symmetry_Int_Tables_number            1

loop_
_symmetry_equiv_pos_as_xyz
   'x, y, z'

loop_
   _atom_site_label
   _atom_site_fract_x
   _atom_site_fract_y
   _atom_site_fract_z
Na       0.000013486   0.000220287   0.273666601
Na       0.673604404   0.339799060   0.610420266
Na       0.332094636   0.664730384   0.942522228
Mg       0.126261360   0.062988088   0.646608115
Mg       0.937222807   0.063468149   0.642499645
Mg       0.936633321   0.873533234   0.638401202
Mg       0.795394767   0.397708543   0.981654988
Mg       0.604014174   0.397635432   0.980252372
Mg       0.604195111   0.208151261   0.979771448
Al       0.462511725   0.731253159   0.324441140
Al       0.268100675   0.730350642   0.322812858
Al       0.268929657   0.538157905   0.322365586
Al       0.298363482   0.261591602   0.629574408
Al       0.738839228   0.037301443   0.628688514
Al       0.962837350   0.701568412   0.630551227
Al       0.738876159   0.701518809   0.629646828
Al       0.963350005   0.261600042   0.631017000
Al       0.298416040   0.037225621   0.628662189
Al       0.966721412   0.596510606   0.964684424
Al       0.405933963   0.370332635   0.963267143
Al       0.630494563   0.035919102   0.963019248
Al       0.405476910   0.035982032   0.963081669
Al       0.630514783   0.596602360   0.964242737
Al       0.966653849   0.370232900   0.965054649
Al       0.631201560   0.929068453   0.298013527
Mg       0.070294846   0.701450344   0.299441854
Al       0.297958257   0.369348419   0.298410234
Mg       0.071304891   0.368899933   0.299288475
Al       0.297221512   0.928506436   0.298014058
Mg       0.631656852   0.702463799   0.298287409
Si       0.191899947   0.191367734   0.014432752
Si       0.807092151  -0.000733038   0.013111799
Si       0.997353412   0.806993393   0.010831746
Si       0.809099665   0.805878843   0.010757854
Si       0.995702615   0.189304063   0.011860156
Si       0.192880929   0.001247834   0.014101503
Si       0.858320131   0.522070871   0.352730904
Si       0.474585349   0.334048503   0.348357640
Si       0.662414708   0.139221060   0.348823434
Si       0.474792292   0.139783798   0.348175612
Si       0.662650585   0.522127183   0.352494110
Si       0.858021614   0.333436267   0.352284478
Si       0.524797711   0.855986134   0.690279650
Si       0.146274618   0.669194104   0.692357739
Si       0.330785249   0.474968122   0.691204336
Si       0.146086017   0.476671932   0.692187647
Si       0.330845413   0.856318202   0.689934812
Si       0.523313212   0.669020554   0.691319023
B        0.110316930   0.220591461   0.478782423
B        0.779055430   0.889473464   0.476845342
B        0.109981033   0.889305798   0.477611623
B        0.777582209   0.554763535   0.810027868
B        0.447052460   0.223683448   0.804350036
B        0.777387870   0.223456952   0.807309598
B        0.443263730   0.886676168   0.149377544
B        0.117131736   0.558612874   0.129961280
B        0.442403003   0.557628043   0.140040855
O       -0.000034376  -0.000028542   0.791146857
O        0.666186115   0.333036988   0.128255473
O        0.335407951   0.669188664   0.451179477
O        0.064639195   0.123671348   0.496041733
O        0.876103557   0.940739751   0.493066891
O        0.064541081   0.940812377   0.494443628
O        0.729482837   0.458157549   0.836707266
O        0.543164336   0.271824673   0.830604404
O        0.728899026   0.271347865   0.833664970
O        0.393661966   0.787243509   0.192809389
O        0.217401316   0.608842762   0.187019695
O        0.391665991   0.606731814   0.190670495
O        0.270866964   0.135423494   0.528536790
O        0.862424776   0.133071654   0.528230494
O        0.864434142   0.729156637   0.527641380
O        0.936563392   0.467829335   0.862836139
O        0.530405721   0.467366915   0.863048664
O        0.530715409   0.062081189   0.864246911
O        0.581479380   0.797921796   0.196271091
O        0.216380695   0.798302469   0.196606477
O        0.216152486   0.418061107   0.197059839
O        0.092358264   0.186598559   0.082803095
O        0.806465182   0.902138145   0.082401699
O        0.095110957   0.905310797   0.082314922
O        0.755672222   0.512929633   0.412906365
O        0.474410649   0.236543066   0.416826392
O        0.757381999   0.237167246   0.416058755
O        0.423443678   0.847408569   0.760139022
O        0.158944164   0.579298010   0.768893739
O        0.421287555   0.576968893   0.764846428
O        0.187112679   0.093545402   0.103528462
O        0.906298296   0.088913396   0.103123008
O        0.910951016   0.822168346   0.102651340
O        0.845494010   0.421184182   0.442512832
O        0.572578875   0.421728005   0.441684710
O        0.572594254   0.147977571   0.440394555
O        0.519342706   0.760754691   0.789486942
O        0.241014028   0.762183118   0.790413737
O        0.239509167   0.476923821   0.791498720
O        0.199988061   0.190796711   0.793054633
O        0.807914876   0.007601957   0.791820016
O        0.989898449   0.802658988   0.789895418
O        0.812613771   0.801861934   0.789915167
O        0.988134539   0.186266889   0.790895064
O        0.200720497   0.010061045   0.792788801
O        0.870216254   0.522361957   0.131937288
O        0.475051283   0.341453658   0.127092897
O        0.654335644   0.131985775   0.127621088
O        0.476531973   0.133066228   0.127005806
O        0.650357426   0.521059314   0.131660678
O        0.868591501   0.344858211   0.131307023
O        0.524815041   0.847938410   0.465887238
O        0.161406641   0.677651957   0.471323713
O        0.323102570   0.475418104   0.466673398
O        0.161776093   0.484132160   0.471273791
O        0.323151452   0.848166000   0.465535470
O        0.516637635   0.677415211   0.470364765
O        0.284335597   0.288075336   0.098177960
O        0.711522876  -0.002422709   0.098008497
O        0.995989409   0.712659509   0.088549608
O        0.716619223   0.710953511   0.088773116
O        0.996316389   0.283365151   0.088422202
O        0.285766180  -0.002392965   0.097962159
O        0.947195266   0.614206887   0.446340431
O        0.381137834   0.335802272   0.432647425
O        0.661622569   0.044418831   0.433176133
O        0.381303474   0.044739509   0.432367837
O        0.665752830   0.614178572   0.445821240
O        0.947646275   0.331483350   0.445033423
O        0.616479504   0.952704789   0.764904450
O        0.048426753   0.663844482   0.760463185
O        0.336429108   0.383072584   0.764093333
O        0.047857759   0.384188543   0.759959353
O        0.336230370   0.953426184   0.764243984
O        0.615656480   0.664032056   0.761246554
O        0.211979893   0.274120926   0.461018630
O        0.725339487   0.937610229   0.459623903
O        0.062477145   0.791177301   0.476653453
O        0.728585917   0.791208938   0.476719235
O        0.062313162   0.270797350   0.477798474
O        0.211924120   0.937952069   0.460537748
O        0.877397534   0.605426668   0.797748822
O        0.395372051   0.272346519   0.792619784
O        0.726497042   0.122451255   0.793304494
O        0.396111243   0.123052891   0.792068801
O        0.727198791   0.604429857   0.796597408
O        0.876866259   0.271497743   0.796691680
O        0.541119250   0.935255873   0.129727058
O        0.072301204   0.610098460   0.106727491
O        0.393806445   0.458497040   0.130937068
O        0.071916259   0.462136163   0.107443755
O        0.394170042   0.935580247   0.129960401
O        0.537150200   0.609032503   0.105415598
H       -0.006677210  -0.008037474   0.921908704
H        0.671680695   0.339743603   0.259356733
H        0.332776823   0.666968960   0.583618119
H        0.266532293   0.133543605   0.395134748
H        0.864055132   0.133912809   0.394725165
H        0.863616270   0.726855761   0.394246859
H        0.933428135   0.466114628   0.729380858
H        0.532414730   0.466080061   0.729569358
H        0.532304992   0.065409216   0.730761650
H        0.579062981   0.794980056   0.062365619
H        0.214866746   0.794783133   0.062697218
H        0.215289321   0.420142010   0.063051433
