# Supplementary material for: Theoretical OH stretching vibrations in dravite
Source: Copernicus journal article supplement (doi:10.5194/ejm-34-239-2022), 2022-04-13
Supplement: Supplementary file 3 [file ejm-34-239-2022-supplement.zip › ejm-2021-65-supplement-version2/supplementary_files/Structure_and_eigendisplacement_files/dravite_models_with_YZ_inversion/dravite_inver_3_3_PBE.cif]

#======================================================================

# CRYSTAL DATA

#----------------------------------------------------------------------

data_VESTA_phase_1


_pd_phase_name                         
_cell_length_a 16.1067867
_cell_length_b 16.1067867
_cell_length_c 7.27903080
_cell_angle_alpha                      90
_cell_angle_beta                       90
_cell_angle_gamma                      120
_symmetry_space_group_name_H-M         'P1'
_symmetry_Int_Tables_number            1

loop_
_symmetry_equiv_pos_as_xyz
   'x, y, z'

loop_
   _atom_site_label
   _atom_site_fract_x
   _atom_site_fract_y
   _atom_site_fract_z
Na       0.000044839   0.000058182   0.273768662
Na       0.666629134   0.333291670   0.610721361
Na       0.333331301   0.666659472   0.943653234
Mg       0.126356205   0.063861746   0.642187430
Mg       0.936131934   0.062487426   0.642151529
Mg       0.937504860   0.873636059   0.642069331
Mg       0.793608780   0.397463088   0.980315279
Mg       0.602548825   0.396149942   0.980351553
Mg       0.603863031   0.206407304   0.980398086
Al       0.462200493   0.730537536   0.323962988
Al       0.269464754   0.731665072   0.323963075
Al       0.268336258   0.537798370   0.323970554
Al       0.298342116   0.261364780   0.629947487
Al       0.738632909   0.036974932   0.629924912
Al       0.963024475   0.701657353   0.629893845
Al       0.738534911   0.701545044   0.629433892
Al       0.963010912   0.261459825   0.629471801
Al       0.298454741   0.036992424   0.629472956
Al       0.966009262   0.596525045   0.964472947
Al       0.403475755   0.369481539   0.964517495
Al       0.630516313   0.033994559   0.964501700
Al       0.405861801   0.035447326   0.963109509
Al       0.629586098   0.594141473   0.963077738
Al       0.964557081   0.370410867   0.963101542
Mg       0.631656662   0.928321665   0.298169782
Mg       0.071683017   0.703341039   0.298142516
Mg       0.296665042   0.368341775   0.298189067
Al       0.070803756   0.369352546   0.298410867
Al       0.298554719   0.929199604   0.298412547
Al       0.630646043   0.701451372   0.298380927
Si       0.194673604   0.189832613   0.011626129
Si       0.810163540   0.004842188   0.011589842
Si       0.995157868   0.805322806   0.011556955
Si       0.807529437   0.808684409   0.013278448
Si       1.001157814   0.192462521   0.013336289
Si       0.191313407  -0.001152928   0.013328444
Si       0.858909920   0.524493088   0.351714843
Si       0.475511964   0.334414861   0.351752502
Si       0.665587726   0.141096917   0.351750920
Si       0.476801344   0.140027431   0.348929441
Si       0.663227515   0.523203571   0.348895417
Si       0.859977897   0.336774158   0.348906407
Si       0.523793120   0.854530124   0.691199548
Si       0.145471328   0.669264814   0.691190031
Si       0.330735743   0.476205134   0.691210723
Si       0.144507210   0.475561655   0.691627978
Si       0.331055984   0.855495001   0.691626721
Si       0.524436916   0.668944404   0.691614622
B        0.110087835   0.220814421   0.477781080
B        0.779188564   0.889274676   0.477726309
B        0.110731276   0.889920075   0.477738603
B        0.776965813   0.553828268   0.806955679
B        0.446168454   0.223135638   0.807019479
B        0.776863273   0.223030511   0.806996049
B        0.442359792   0.884687432   0.140081762
B        0.115315171   0.557672966   0.140071333
B        0.442327069   0.557641207   0.140080690
O       -0.000013764  -0.000019591   0.790551852
O        0.666688941   0.333357057   0.127901426
O        0.333333889   0.666667379   0.451782988
O        0.059061077   0.123804816   0.494223725
O        0.876198936   0.935259060   0.494144064
O        0.064756814   0.940955138   0.494168962
O        0.728238741   0.457437033   0.833252901
O        0.542558747   0.270799209   0.833335569
O        0.729197338   0.271755570   0.833300793
O        0.391441872   0.784875243   0.190568467
O        0.215125912   0.606566306   0.190569782
O        0.393431116   0.608557058   0.190571664
O        0.270774853   0.133286230   0.528106938
O        0.866718326   0.137491219   0.528091965
O        0.862506514   0.729221412   0.528046988
O        0.937097821   0.468228648   0.863183604
O        0.531767255   0.468862819   0.863199798
O        0.531137690   0.062908751   0.863214692
O        0.581661522   0.783933429   0.196824742
O        0.216070959   0.797733523   0.196830810
O        0.202268993   0.418333564   0.196845535
O        0.097088058   0.189941707   0.082545656
O        0.810050261   0.907138605   0.082439663
O        0.092851162   0.902911436   0.082456057
O        0.758718287   0.520203409   0.415364307
O        0.479804300   0.238516451   0.415423993
O        0.761488155   0.241288834   0.415403528
O        0.421790793   0.844464497   0.765178466
O        0.155534972   0.577327174   0.765170579
O        0.422674765   0.578208925   0.765178045
O        0.182627416   0.089175240   0.103044734
O        0.910822571   0.093442965   0.103023938
O        0.906552311   0.817379769   0.102966313
O        0.848606915   0.424488638   0.441230800
O        0.575519586   0.424122806   0.441248002
O        0.575882378   0.151393769   0.441268803
O        0.521135671   0.760052341   0.790662772
O        0.239945830   0.761083539   0.790664529
O        0.238917361   0.478865309   0.790677533
O        0.198951309   0.186499097   0.790728110
O        0.813501532   0.012458721   0.790692873
O        0.987543438   0.801045865   0.790658130
O        0.808040959   0.800915683   0.791912263
O        0.992878830   0.191955696   0.791969925
O        0.199087426   0.007130383   0.791964184
O        0.868927363   0.522266389   0.130728519
O        0.477738213   0.346658742   0.130766068
O        0.653343829   0.131078563   0.130764998
O        0.476445990   0.132176304   0.127759918
O        0.655730704   0.523558254   0.127725401
O        0.867827404   0.344269138   0.127736142
O        0.516397554   0.839032331   0.470328570
O        0.160970210   0.677369002   0.470320504
O        0.322633101   0.483601164   0.470340180
O        0.152507110   0.475508183   0.467099403
O        0.323004902   0.847495961   0.467096884
O        0.524489932   0.676997923   0.467085828
O        0.288705764   0.283415925   0.088535791
O        0.716582619   0.005288946   0.088514484
O        0.994712610   0.711295895   0.088485165
O        0.711732791   0.715353813   0.098171264
O        1.003622897   0.288263774   0.098208293
O        0.284644363  -0.003622400   0.098209535
O        0.948552303   0.616034049   0.444285548
O        0.383971039   0.332514597   0.444330733
O        0.667487256   0.051453936   0.444315437
O        0.382771100   0.045139776   0.433529379
O        0.662366315   0.617231793   0.433495140
O        0.954863786   0.337631870   0.433519149
O        0.616158543   0.952273626   0.760598066
O        0.047724999   0.663885890   0.760571208
O        0.336113462   0.383839987   0.760615285
O        0.047353096   0.383656526   0.764718933
O        0.336308156   0.952649705   0.764722420
O        0.616341615   0.663693110   0.764696821
O        0.208448985   0.270825231   0.477669402
O        0.729175647   0.937623174   0.477639164
O        0.062374108   0.791558026   0.477606549
O        0.725249131   0.787666540   0.460034824
O        0.062417821   0.274751378   0.460080605
O        0.212339311   0.937583691   0.460075545
O        0.876690506   0.604421118   0.795499562
O        0.395577153   0.272267744   0.795550521
O        0.727730568   0.123307069   0.795533241
O        0.395256921   0.122402539   0.793940538
O        0.727144431   0.604741920   0.793895003
O        0.877597843   0.272851530   0.793926816
O        0.537317941   0.928542634   0.106218678
O        0.071462049   0.608777433   0.106194674
O        0.391225402   0.462681245   0.106233691
O        0.065177490   0.458676582   0.130571704
O        0.393502594   0.934826075   0.130576008
O        0.541322531   0.606501998   0.130556968
H       -0.000137001  -0.000185995   0.922297102
H        0.666772922   0.333450234   0.259681307
H        0.333338232   0.666672198   0.584330060
H        0.269834226   0.133438447   0.394578093
H        0.866566530   0.136405409   0.394561260
H        0.863586976   0.730144247   0.394516769
H        0.933844806   0.467196346   0.729719378
H        0.532789315   0.466629331   0.729736204
H        0.533368907   0.066175094   0.729751561
H        0.579095245   0.783768705   0.062847358
H        0.216243247   0.795341345   0.062853013
H        0.204665692   0.420894206   0.062868001
