# Supplementary material for: Theoretical OH stretching vibrations in dravite
Source: Copernicus journal article supplement (doi:10.5194/ejm-34-239-2022), 2022-04-13
Supplement: Supplementary file 3 [file ejm-34-239-2022-supplement.zip › ejm-2021-65-supplement-version2/supplementary_files/Structure_and_eigendisplacement_files/dravite_models_with_YZ_inversion/dravite_inver_Mg_Al_2_PBE.cif]

#======================================================================

# CRYSTAL DATA

#----------------------------------------------------------------------

data_VESTA_phase_1


_pd_phase_name                         
_cell_length_a 16.1067867
_cell_length_b 16.1067867
_cell_length_c 7.27903080
_cell_angle_alpha                      90
_cell_angle_beta                       90
_cell_angle_gamma                      120
_symmetry_space_group_name_H-M         'P1'
_symmetry_Int_Tables_number            1

loop_
_symmetry_equiv_pos_as_xyz
   'x, y, z'

loop_
   _atom_site_label
   _atom_site_fract_x
   _atom_site_fract_y
   _atom_site_fract_z
Na       0.000667573   0.002946686   0.275571402
Na       0.669616325   0.333676479   0.610406114
Na       0.335191058   0.661807701   0.938647508
Mg       0.126495657   0.063059487   0.646851896
Mg       0.937135172   0.063668701   0.644057282
Mg       0.936461561   0.873433599   0.645191925
Mg       0.794365768   0.396132996   0.980474195
Mg       0.603828013   0.396245907   0.980846323
Mg       0.603870883   0.206701359   0.979232392
Mg       0.459830293   0.729533281   0.316356653
Al       0.268394710   0.730681064   0.315445127
Mg       0.268386537   0.538230640   0.309333266
Al       0.298548768   0.262476868   0.633396190
Al       0.739087500   0.037229305   0.631883643
Al       0.962512647   0.701233270   0.631331995
Al       0.737807446   0.700989483   0.633348330
Al       0.964572095   0.262529980   0.633987238
Al       0.298460633   0.037722030   0.630464147
Al       0.963618414   0.594108153   0.963514264
Al       0.405209734   0.369578528   0.968331362
Al       0.629133126   0.033457192   0.964422267
Al       0.405552978   0.036308613   0.962752160
Al       0.630073337   0.594811161   0.967173176
Al       0.968261355   0.371194558   0.967815811
Al       0.631564993   0.927429211   0.300110463
Al       0.068631254   0.701458166   0.298062927
Al       0.296962262   0.368888625   0.300722733
Mg       0.073994229   0.369496832   0.300133723
Al       0.297687021   0.930549847   0.297311889
Al       0.631695572   0.702830314   0.300759926
Si       0.192138795   0.191339701   0.017402098
Si       0.808390118   0.001191710   0.016199030
Si       0.998400361   0.808017675   0.014332547
Si       0.809054061   0.807188367   0.016247755
Si       0.996341956   0.190706285   0.015330111
Si       0.192309424   0.001953472   0.014663828
Si       0.858689914   0.523758396   0.349627531
Si       0.476188415   0.334746505   0.350788010
Si       0.662945099   0.139061124   0.349137238
Si       0.475357294   0.140193224   0.348735345
Si       0.664660069   0.523942967   0.350795816
Si       0.858649998   0.334854580   0.353115815
Si       0.525413794   0.856781301   0.683486081
Si       0.143834666   0.669814709   0.685462166
Si       0.331689599   0.474288748   0.686911004
Si       0.144778268   0.476429543   0.686527890
Si       0.331299290   0.857187299   0.683085464
Si       0.526019408   0.668461974   0.685730572
B        0.110249990   0.219454989   0.481480490
B        0.779307480   0.889230278   0.473812659
B        0.110133360   0.889189991   0.471346383
B        0.776486923   0.553205953   0.807093653
B        0.447108066   0.223823488   0.806107204
B        0.777771845   0.223036629   0.809533287
B        0.440438197   0.885894460   0.143884492
B        0.115106339   0.561963700   0.134159422
B        0.444283144   0.556747197   0.143182973
O       -0.000283348  -0.001471436   0.793355230
O        0.666998628   0.332767754   0.127720241
O        0.327845137   0.674737812   0.454894666
O        0.063365122   0.121881917   0.497667470
O        0.875657796   0.937520905   0.496886460
O        0.062172343   0.937114879   0.496964910
O        0.728947241   0.457034688   0.832349828
O        0.543439396   0.271296625   0.830784900
O        0.728753397   0.270741065   0.833875378
O        0.385719487   0.788525987   0.178305006
O        0.212979275   0.618157876   0.171509987
O        0.395645009   0.605225252   0.169148771
O        0.270725167   0.134583097   0.531613411
O        0.862891661   0.132990083   0.531841617
O        0.864942648   0.729325411   0.531028508
O        0.936332339   0.469756486   0.863896174
O        0.531932735   0.468638059   0.867240141
O        0.530535949   0.062097994   0.864364627
O        0.602405403   0.800648777   0.200821583
O        0.204825366   0.796847297   0.197188726
O        0.209438971   0.401630328   0.194205092
O        0.092299820   0.186427778   0.084908987
O        0.812004357   0.905658784   0.086013845
O        0.094139720   0.906162799   0.085311253
O        0.761079688   0.522523033   0.420434293
O        0.479788673   0.239038477   0.420252490
O        0.755315232   0.240689062   0.413551398
O        0.424463951   0.850088913   0.752715203
O        0.154538328   0.579521559   0.759239443
O        0.426236901   0.574853977   0.756873384
O        0.183701851   0.091652227   0.106052399
O        0.906933467   0.090467303   0.107810647
O        0.908531920   0.816665921   0.105364694
O        0.847956821   0.424998148   0.441786804
O        0.575457459   0.424571432   0.441119532
O        0.571536266   0.144903810   0.441261003
O        0.518506142   0.759407342   0.776119667
O        0.239286521   0.762687979   0.778107457
O        0.242633436   0.483352964   0.781605114
O        0.199759007   0.189250291   0.796128253
O        0.808948917   0.007429818   0.794812460
O        0.991261917   0.801047933   0.792977676
O        0.810473679   0.800213419   0.794975301
O        0.987960662   0.185974087   0.794631083
O        0.199134743   0.008471451   0.793309405
O        0.865201972   0.523991293   0.128357957
O        0.477694260   0.341814047   0.129341515
O        0.653352313   0.130534565   0.128203084
O        0.476382833   0.134443079   0.127340578
O        0.656917550   0.522606482   0.129589353
O        0.869527801   0.347714917   0.132296234
O        0.530445506   0.855403678   0.461749715
O        0.151230627   0.680816448   0.460613457
O        0.325773831   0.469726690   0.465743151
O        0.151859730   0.480171995   0.468159696
O        0.320383830   0.849818297   0.458744221
O        0.531393277   0.676175102   0.464197094
O        0.286302965   0.285039962   0.102422145
O        0.712087345  -0.002431326   0.100184188
O        1.000806144   0.715569438   0.099497065
O        0.714804040   0.714266718   0.102392077
O        0.995789372   0.284170519   0.091492199
O        0.284872168  -0.001575568   0.098047174
O        0.953185656   0.618330659   0.434056588
O        0.382109023   0.333648962   0.436177810
O        0.666086634   0.046716923   0.433349740
O        0.380209072   0.046395068   0.432107551
O        0.665570478   0.618248620   0.435961855
O        0.946270271   0.330229733   0.446816094
O        0.617300987   0.952182328   0.766530283
O        0.047091181   0.665236450   0.762874920
O        0.334613515   0.381878777   0.770814804
O        0.048416821   0.383974686   0.765810019
O        0.335724258   0.953623497   0.761901954
O        0.618717806   0.666176128   0.769177545
O        0.211600123   0.270911056   0.464587985
O        0.727428539   0.937650482   0.462786317
O        0.061516978   0.788709539   0.459595295
O        0.728345015   0.788748200   0.463326602
O        0.061998769   0.269384147   0.481192691
O        0.210601635   0.937838597   0.459321269
O        0.876945806   0.605036341   0.794706903
O        0.396175262   0.272915499   0.795661517
O        0.727101036   0.122207985   0.796343449
O        0.395616881   0.123162356   0.793846670
O        0.727130784   0.604118465   0.796030011
O        0.877171288   0.272122058   0.799437665
O        0.539444461   0.931241272   0.125841898
O        0.061563860   0.608620430   0.129497373
O        0.397379708   0.457113663   0.131858776
O        0.071590623   0.465939654   0.106169397
O        0.394264579   0.938983612   0.129778696
O        0.544467661   0.607377190   0.129963777
H       -0.002333329   0.001504138   0.924750514
H        0.669821622   0.331856932   0.259272590
H        0.306793898   0.656601181   0.579765758
H        0.268429070   0.134948119   0.398154295
H        0.864141729   0.134758126   0.398379046
H        0.864720183   0.730250631   0.397488186
H        0.934395017   0.467551794   0.730406448
H        0.532026266   0.467745828   0.733720358
H        0.531864536   0.064228652   0.730790974
H        0.602895665   0.800771608   0.067265914
H        0.205722043   0.794843915   0.063153044
H        0.209279038   0.400976698   0.060956807
