# Supplementary material for: Theoretical OH stretching vibrations in dravite
Source: Copernicus journal article supplement (doi:10.5194/ejm-34-239-2022), 2022-04-13
Supplement: Supplementary file 3 [file ejm-34-239-2022-supplement.zip › ejm-2021-65-supplement-version2/supplementary_files/Structure_and_eigendisplacement_files/dravite_models_with_YZ_inversion/dravite_inver_Mg_Al_3_PBE.cif]

#======================================================================

# CRYSTAL DATA

#----------------------------------------------------------------------

data_VESTA_phase_1


_pd_phase_name                         
_cell_length_a 16.1067867
_cell_length_b 16.1067867
_cell_length_c 7.27903080
_cell_angle_alpha                      90
_cell_angle_beta                       90
_cell_angle_gamma                      120
_symmetry_space_group_name_H-M         'P1'
_symmetry_Int_Tables_number            1

loop_
_symmetry_equiv_pos_as_xyz
   'x, y, z'

loop_
   _atom_site_label
   _atom_site_fract_x
   _atom_site_fract_y
   _atom_site_fract_z
Na       0.000024460   0.002706244   0.275353390
Na       0.663581929   0.333902607   0.610325349
Na       0.336348563   0.660938016   0.939112093
Mg       0.126686017   0.063919637   0.641920351
Mg       0.936679338   0.063076725   0.648332900
Mg       0.936987940   0.873458481   0.645256130
Mg       0.792659365   0.395976308   0.979680357
Mg       0.602293589   0.396270163   0.981685540
Mg       0.603479945   0.206629912   0.979087391
Mg       0.460288374   0.729434758   0.316150039
Al       0.268481273   0.730813332   0.314828581
Mg       0.270376573   0.538641620   0.311842741
Al       0.298245890   0.263350849   0.635447947
Al       0.738978628   0.037125643   0.631876894
Al       0.962295415   0.700986593   0.630283836
Al       0.737845784   0.701181249   0.634490397
Al       0.963693881   0.262084415   0.632059027
Al       0.298381717   0.037906690   0.629807283
Al       0.963464332   0.594176148   0.963220012
Al       0.403252094   0.369412912   0.970062731
Al       0.629041496   0.033518261   0.964460127
Al       0.405339451   0.036014287   0.962104705
Al       0.629732210   0.594497183   0.967479319
Al       0.965963802   0.370790231   0.966460488
Al       0.631873815   0.927029078   0.299812723
Al       0.068725791   0.701627673   0.297236937
Mg       0.296741348   0.369707884   0.301156794
Al       0.073312391   0.369167382   0.300325689
Al       0.298255196   0.931084457   0.296870459
Al       0.631557858   0.702373106   0.301469638
Si       0.193249570   0.189872317   0.015144750
Si       0.809270861   0.002436464   0.017046711
Si       0.998242691   0.806957280   0.013769761
Si       0.809884385   0.808120384   0.016815430
Si       0.998944338   0.192228799   0.017462983
Si       0.191798822   0.000609293   0.013135199
Si       0.859244369   0.523527935   0.349290288
Si       0.476735639   0.334393180   0.354949928
Si       0.664937974   0.139253849   0.348554021
Si       0.477028212   0.139728108   0.348937198
Si       0.665457108   0.524052042   0.351379991
Si       0.859326833   0.335013938   0.349260361
Si       0.526266076   0.857248024   0.683176130
Si       0.143325691   0.669028943   0.683541490
Si       0.332697667   0.476569637   0.689511204
Si       0.143684794   0.474237316   0.686077076
Si       0.331374147   0.856589805   0.682404693
Si       0.526246860   0.668686067   0.687796437
B        0.109570798   0.219511241   0.481165081
B        0.779627860   0.889101975   0.475109322
B        0.110407076   0.889222315   0.469610718
B        0.776480011   0.553183213   0.807087296
B        0.446020951   0.223421677   0.808666638
B        0.776913152   0.223317593   0.806664479
B        0.440195699   0.885538639   0.142897702
B        0.113089318   0.559776278   0.143397171
B        0.444335537   0.558560750   0.134687684
O        0.000097447  -0.001334057   0.793085979
O        0.667019890   0.332570200   0.127775643
O        0.326764308   0.674350943   0.454119777
O        0.058426798   0.121955271   0.497271012
O        0.875897158   0.937651587   0.498938793
O        0.062250466   0.937003447   0.494804435
O        0.728557773   0.457015520   0.832418097
O        0.542586001   0.270752314   0.833384479
O        0.728318523   0.271178850   0.831129677
O        0.385215847   0.788083101   0.176691226
O        0.210772742   0.614558437   0.175732891
O        0.396633573   0.608246849   0.166574951
O        0.270211615   0.132781077   0.530512600
O        0.864284185   0.134985113   0.532255123
O        0.865278387   0.729339185   0.530959101
O        0.937450175   0.469263855   0.864881617
O        0.533974050   0.468884842   0.865916710
O        0.530931820   0.061869720   0.864056559
O        0.603298953   0.801496640   0.201466333
O        0.204287209   0.795454423   0.195918120
O        0.193384480   0.402346542   0.194577481
O        0.093541275   0.186804738   0.084794389
O        0.815234036   0.908170752   0.086537662
O        0.095197530   0.903290658   0.084502659
O        0.762437024   0.522892632   0.420682758
O        0.484615286   0.239697662   0.418845242
O        0.759727099   0.239188114   0.415476666
O        0.424767349   0.849731790   0.751405704
O        0.150625597   0.576161879   0.753060981
O        0.426599293   0.577256424   0.765328225
O        0.179051210   0.087599587   0.104722742
O        0.906689514   0.094089236   0.107964675
O        0.909315663   0.816832379   0.105319467
O        0.849824967   0.424712840   0.440326297
O        0.578276609   0.424084089   0.442446536
O        0.573845488   0.144925349   0.441099056
O        0.520611650   0.761075693   0.777064538
O        0.240073864   0.760305116   0.776257028
O        0.241018599   0.483512525   0.783540028
O        0.197914513   0.185641964   0.794397493
O        0.809944699   0.009239471   0.795652788
O        0.990888341   0.800155169   0.792501678
O        0.811045045   0.801043408   0.795444855
O        0.989883643   0.189873720   0.796137618
O        0.198403832   0.006919561   0.791791099
O        0.865665670   0.522664649   0.128068460
O        0.478492967   0.344798323   0.133693279
O        0.655286744   0.131510970   0.127525119
O        0.477335587   0.133027343   0.127609821
O        0.658504472   0.523698156   0.130176248
O        0.866956130   0.344402122   0.128178395
O        0.530646175   0.855774799   0.461379407
O        0.150676992   0.680155334   0.458978153
O        0.327490823   0.479802673   0.471548337
O        0.143925669   0.470155412   0.464678251
O        0.320002514   0.849260569   0.458006145
O        0.531802196   0.676815828   0.466199369
O        0.287990796   0.281219070   0.094274269
O        0.712265393  -0.002500483   0.099897632
O        0.999850396   0.713873443   0.098792396
O        0.715722951   0.715638104   0.103333721
O        1.000594179   0.287492335   0.100857816
O        0.285158544  -0.001322807   0.097676011
O        0.953839950   0.617945379   0.433629248
O        0.384885042   0.330592748   0.449021732
O        0.667293792   0.046566086   0.432475819
O        0.381420200   0.046147459   0.432500769
O        0.666254404   0.618300088   0.436859369
O        0.952369011   0.334161863   0.434680418
O        0.617957305   0.953060580   0.765883643
O        0.047418815   0.665295078   0.762994851
O        0.334727126   0.382808261   0.768461374
O        0.047645859   0.382626610   0.769053214
O        0.335201753   0.952441334   0.761993244
O        0.619393795   0.666522491   0.769539357
O        0.207677865   0.269186464   0.481269938
O        0.728115239   0.937994571   0.463656668
O        0.061533695   0.788520457   0.458498236
O        0.728678841   0.788859483   0.463983361
O        0.059899814   0.271264321   0.463993342
O        0.210819345   0.937385140   0.457795687
O        0.877211569   0.604063523   0.793794941
O        0.395130540   0.271737149   0.800003808
O        0.727485344   0.122857241   0.795241074
O        0.395467589   0.122376945   0.794155457
O        0.728395130   0.605060710   0.796925277
O        0.877147160   0.273090389   0.795203309
O        0.539366894   0.931230763   0.125395470
O        0.061190787   0.607231961   0.129180400
O        0.396397634   0.461555678   0.111044382
O        0.065122920   0.461012521   0.127707619
O        0.393860985   0.938401204   0.128943251
O        0.545541357   0.608972325   0.130119250
H        0.005562791   0.002100700   0.924420694
H        0.663371472   0.332292057   0.259306142
H        0.315356137   0.665824334   0.584236050
H        0.271510672   0.136084175   0.397205042
H        0.866293328   0.134182192   0.398754642
H        0.864392425   0.730189338   0.397444759
H        0.935551071   0.467530823   0.731369127
H        0.533622830   0.467482561   0.732433651
H        0.532579034   0.064182910   0.730492511
H        0.602974374   0.800583180   0.067891069
H        0.205448680   0.794126969   0.061901981
H        0.193502806   0.402038580   0.061296593
