# Supplementary material for: Theoretical OH stretching vibrations in dravite
Source: Copernicus journal article supplement (doi:10.5194/ejm-34-239-2022), 2022-04-13
Supplement: Supplementary file 3 [file ejm-34-239-2022-supplement.zip › ejm-2021-65-supplement-version2/supplementary_files/Structure_and_eigendisplacement_files/dravite_models_with_YZ_inversion/read_me.txt]

The xxx.mat files provide the normalized eigendisplacements of OH stretching modes obtained by diagonalization of a partial dynamical matrix restricted to a single cluster of the hexagonal cell of dravite (see text). 

- Atoms are ordered as in the corresponding structure file xxx.cif. 
- Displacement coordinates are reported in a cartesian reference frame (X,Y,Z) defined such as the hexagonal lattice vectors are a=(1,0,0), b=(-1/2, sqrt(3)/2,0) c=(0,0,1). 
- Eigendisplacement coordinates should be multiplied by the square root of the corresponding atomic masses to obtain the eigenvectors.
