# Supplementary material for: Theoretical OH stretching vibrations in dravite
Source: Copernicus journal article supplement (doi:10.5194/ejm-34-239-2022), 2022-04-13
Supplement: Supplementary file 3 [file ejm-34-239-2022-supplement.zip › ejm-2021-65-supplement-version2/supplementary_files/Structure_and_eigendisplacement_files/ideal_dravite/dravite_OH_eigendisplacements_hexagonal_cell.txt]

This file provides the normalized eigendisplacements of OH stretching modes obtained by diagonalization of the full or partial dynamical matrix of the hexagonal cell of dravite. 

- Atoms are ordered as in the structure file dravite_P1_hexagonal.cif.
- Displacement coordinates are reported in a cartesian reference frame (X,Y,Z) defined such as the hexagonal lattice vectors are a=(1,0,0), b=(-1/2, sqrt(3)/2,0) c=(0,0,1).  
- Note that eigendisplacements should be multiplied by the square root of the corresponding atomic mass to obtain the eigenvectors of the matrix.   


Eigendisplacements of OH stretching modes from the full dynamical matrix of hexagonal cell
 
     freq (  475) =     109.485548 [THz] =    3652.044792 [cm-1]
 (  0.000000  0.000000  0.000000  0.000000  0.000042  0.000000 ) 
 ( -0.000000  0.000000  0.000000  0.000000  0.000043  0.000000 ) 
 ( -0.000000  0.000000 -0.000000  0.000000  0.000043  0.000000 ) 
 (  0.000041  0.000000  0.000024  0.000000 -0.000109  0.000000 ) 
 ( -0.000041  0.000000  0.000024  0.000000 -0.000109  0.000000 ) 
 ( -0.000000  0.000000 -0.000048  0.000000 -0.000109  0.000000 ) 
 (  0.000045  0.000000  0.000026  0.000000 -0.000114  0.000000 ) 
 ( -0.000045  0.000000  0.000026  0.000000 -0.000114  0.000000 ) 
 (  0.000000  0.000000 -0.000052  0.000000 -0.000114  0.000000 ) 
 (  0.000046  0.000000  0.000026  0.000000 -0.000116  0.000000 ) 
 ( -0.000046  0.000000  0.000026  0.000000 -0.000116  0.000000 ) 
 ( -0.000000  0.000000 -0.000053  0.000000 -0.000116  0.000000 ) 
 (  0.000040  0.000000 -0.000107  0.000000 -0.000106  0.000000 ) 
 (  0.000073  0.000000  0.000088  0.000000 -0.000106  0.000000 ) 
 ( -0.000113  0.000000  0.000019  0.000000 -0.000106  0.000000 ) 
 (  0.000113  0.000000  0.000019  0.000000 -0.000106  0.000000 ) 
 ( -0.000040  0.000000 -0.000107  0.000000 -0.000106  0.000000 ) 
 ( -0.000073  0.000000  0.000088  0.000000 -0.000106  0.000000 ) 
 (  0.000044  0.000000 -0.000109  0.000000 -0.000112  0.000000 ) 
 (  0.000072  0.000000  0.000092  0.000000 -0.000112  0.000000 ) 
 ( -0.000116  0.000000  0.000017  0.000000 -0.000112  0.000000 ) 
 (  0.000116  0.000000  0.000017  0.000000 -0.000112  0.000000 ) 
 ( -0.000044  0.000000 -0.000109  0.000000 -0.000112  0.000000 ) 
 ( -0.000072  0.000000  0.000092  0.000000 -0.000112  0.000000 ) 
 (  0.000045  0.000000 -0.000111  0.000000 -0.000117  0.000000 ) 
 (  0.000074  0.000000  0.000095  0.000000 -0.000117  0.000000 ) 
 ( -0.000119  0.000000  0.000016  0.000000 -0.000117  0.000000 ) 
 (  0.000119  0.000000  0.000016  0.000000 -0.000117  0.000000 ) 
 ( -0.000045  0.000000 -0.000111  0.000000 -0.000117  0.000000 ) 
 ( -0.000074  0.000000  0.000095  0.000000 -0.000117  0.000000 ) 
 ( -0.000064  0.000000  0.000139  0.000000 -0.000069  0.000000 ) 
 ( -0.000088  0.000000 -0.000125  0.000000 -0.000069  0.000000 ) 
 (  0.000152  0.000000 -0.000014  0.000000 -0.000069  0.000000 ) 
 ( -0.000152  0.000000 -0.000014  0.000000 -0.000069  0.000000 ) 
 (  0.000064  0.000000  0.000139  0.000000 -0.000069  0.000000 ) 
 (  0.000088  0.000000 -0.000125  0.000000 -0.000069  0.000000 ) 
 ( -0.000068  0.000000  0.000147  0.000000 -0.000078  0.000000 ) 
 ( -0.000093  0.000000 -0.000132  0.000000 -0.000078  0.000000 ) 
 (  0.000161  0.000000 -0.000015  0.000000 -0.000078  0.000000 ) 
 ( -0.000161  0.000000 -0.000015  0.000000 -0.000078  0.000000 ) 
 (  0.000068  0.000000  0.000147  0.000000 -0.000078  0.000000 ) 
 (  0.000093  0.000000 -0.000132  0.000000 -0.000078  0.000000 ) 
 ( -0.000068  0.000000  0.000148  0.000000 -0.000077  0.000000 ) 
 ( -0.000094  0.000000 -0.000133  0.000000 -0.000077  0.000000 ) 
 (  0.000163  0.000000 -0.000015  0.000000 -0.000077  0.000000 ) 
 ( -0.000163  0.000000 -0.000015  0.000000 -0.000077  0.000000 ) 
 (  0.000068  0.000000  0.000148  0.000000 -0.000077  0.000000 ) 
 (  0.000094  0.000000 -0.000133  0.000000 -0.000077  0.000000 ) 
 ( -0.000000  0.000000  0.000027  0.000000 -0.000019  0.000000 ) 
 ( -0.000023  0.000000 -0.000013  0.000000 -0.000019  0.000000 ) 
 (  0.000023  0.000000 -0.000013  0.000000 -0.000019  0.000000 ) 
 (  0.000000  0.000000  0.000027  0.000000 -0.000015  0.000000 ) 
 ( -0.000023  0.000000 -0.000013  0.000000 -0.000015  0.000000 ) 
 (  0.000023  0.000000 -0.000013  0.000000 -0.000015  0.000000 ) 
 ( -0.000000  0.000000  0.000030  0.000000 -0.000020  0.000000 ) 
 ( -0.000026  0.000000 -0.000015  0.000000 -0.000020  0.000000 ) 
 (  0.000026  0.000000 -0.000015  0.000000 -0.000020  0.000000 ) 
 ( -0.000000  0.000000 -0.000000  0.000000  0.000005  0.000000 ) 
 (  0.000000  0.000000 -0.000000  0.000000  0.000002  0.000000 ) 
 (  0.000000  0.000000  0.000000  0.000000  0.000003  0.000000 ) 
 (  0.000000  0.000000 -0.000014  0.000000 -0.000005  0.000000 ) 
 (  0.000012  0.000000  0.000007  0.000000 -0.000005  0.000000 ) 
 ( -0.000012  0.000000  0.000007  0.000000 -0.000005  0.000000 ) 
 ( -0.000000  0.000000 -0.000012  0.000000 -0.000006  0.000000 ) 
 (  0.000010  0.000000  0.000006  0.000000 -0.000006  0.000000 ) 
 ( -0.000010  0.000000  0.000006  0.000000 -0.000006  0.000000 ) 
 ( -0.000000  0.000000 -0.000012  0.000000 -0.000006  0.000000 ) 
 (  0.000011  0.000000  0.000006  0.000000 -0.000006  0.000000 ) 
 ( -0.000011  0.000000  0.000006  0.000000 -0.000006  0.000000 ) 
 ( -0.000185  0.000000 -0.000107  0.000000 -0.019879  0.000000 ) 
 (  0.000185  0.000000 -0.000107  0.000000 -0.019879  0.000000 ) 
 (  0.000000  0.000000  0.000214  0.000000 -0.019879  0.000000 ) 
 ( -0.000196  0.000000 -0.000113  0.000000 -0.021070  0.000000 ) 
 (  0.000196  0.000000 -0.000113  0.000000 -0.021070  0.000000 ) 
 ( -0.000000  0.000000  0.000226  0.000000 -0.021070  0.000000 ) 
 ( -0.000199  0.000000 -0.000115  0.000000 -0.021295  0.000000 ) 
 (  0.000199  0.000000 -0.000115  0.000000 -0.021295  0.000000 ) 
 ( -0.000000  0.000000  0.000230  0.000000 -0.021295  0.000000 ) 
 ( -0.000000  0.000000 -0.000083  0.000000 -0.000006  0.000000 ) 
 (  0.000072  0.000000  0.000041  0.000000 -0.000006  0.000000 ) 
 ( -0.000072  0.000000  0.000041  0.000000 -0.000006  0.000000 ) 
 (  0.000000  0.000000 -0.000083  0.000000 -0.000003  0.000000 ) 
 (  0.000072  0.000000  0.000042  0.000000 -0.000003  0.000000 ) 
 ( -0.000072  0.000000  0.000042  0.000000 -0.000003  0.000000 ) 
 (  0.000000  0.000000 -0.000086  0.000000 -0.000006  0.000000 ) 
 (  0.000074  0.000000  0.000043  0.000000 -0.000006  0.000000 ) 
 ( -0.000074  0.000000  0.000043  0.000000 -0.000006  0.000000 ) 
 (  0.000090  0.000000  0.000052  0.000000  0.000234  0.000000 ) 
 ( -0.000090  0.000000  0.000052  0.000000  0.000234  0.000000 ) 
 ( -0.000000  0.000000 -0.000104  0.000000  0.000234  0.000000 ) 
 (  0.000096  0.000000  0.000055  0.000000  0.000250  0.000000 ) 
 ( -0.000096  0.000000  0.000055  0.000000  0.000250  0.000000 ) 
 ( -0.000000  0.000000 -0.000111  0.000000  0.000250  0.000000 ) 
 (  0.000097  0.000000  0.000056  0.000000  0.000251  0.000000 ) 
 ( -0.000097  0.000000  0.000056  0.000000  0.000251  0.000000 ) 
 (  0.000000  0.000000 -0.000112  0.000000  0.000251  0.000000 ) 
 ( -0.000049  0.000000 -0.000032  0.000000  0.000150  0.000000 ) 
 (  0.000052  0.000000 -0.000026  0.000000  0.000150  0.000000 ) 
 ( -0.000003  0.000000  0.000058  0.000000  0.000150  0.000000 ) 
 (  0.000003  0.000000  0.000058  0.000000  0.000150  0.000000 ) 
 (  0.000049  0.000000 -0.000032  0.000000  0.000150  0.000000 ) 
 ( -0.000052  0.000000 -0.000026  0.000000  0.000150  0.000000 ) 
 ( -0.000052  0.000000 -0.000035  0.000000  0.000161  0.000000 ) 
 (  0.000056  0.000000 -0.000027  0.000000  0.000161  0.000000 ) 
 ( -0.000005  0.000000  0.000062  0.000000  0.000161  0.000000 ) 
 (  0.000005  0.000000  0.000062  0.000000  0.000161  0.000000 ) 
 (  0.000052  0.000000 -0.000035  0.000000  0.000161  0.000000 ) 
 ( -0.000056  0.000000 -0.000027  0.000000  0.000161  0.000000 ) 
 ( -0.000051  0.000000 -0.000034  0.000000  0.000163  0.000000 ) 
 (  0.000055  0.000000 -0.000027  0.000000  0.000163  0.000000 ) 
 ( -0.000004  0.000000  0.000061  0.000000  0.000163  0.000000 ) 
 (  0.000004  0.000000  0.000061  0.000000  0.000163  0.000000 ) 
 (  0.000051  0.000000 -0.000034  0.000000  0.000163  0.000000 ) 
 ( -0.000055  0.000000 -0.000027  0.000000  0.000163  0.000000 ) 
 (  0.000070  0.000000 -0.000149  0.000000 -0.000018  0.000000 ) 
 (  0.000094  0.000000  0.000135  0.000000 -0.000018  0.000000 ) 
 ( -0.000163  0.000000  0.000014  0.000000 -0.000018  0.000000 ) 
 (  0.000163  0.000000  0.000014  0.000000 -0.000018  0.000000 ) 
 ( -0.000070  0.000000 -0.000149  0.000000 -0.000018  0.000000 ) 
 ( -0.000094  0.000000  0.000135  0.000000 -0.000018  0.000000 ) 
 (  0.000065  0.000000 -0.000151  0.000000 -0.000013  0.000000 ) 
 (  0.000098  0.000000  0.000132  0.000000 -0.000013  0.000000 ) 
 ( -0.000163  0.000000  0.000019  0.000000 -0.000013  0.000000 ) 
 (  0.000163  0.000000  0.000019  0.000000 -0.000013  0.000000 ) 
 ( -0.000065  0.000000 -0.000151  0.000000 -0.000013  0.000000 ) 
 ( -0.000098  0.000000  0.000132  0.000000 -0.000013  0.000000 ) 
 (  0.000068  0.000000 -0.000155  0.000000 -0.000017  0.000000 ) 
 (  0.000100  0.000000  0.000136  0.000000 -0.000017  0.000000 ) 
 ( -0.000168  0.000000  0.000018  0.000000 -0.000017  0.000000 ) 
 (  0.000168  0.000000  0.000018  0.000000 -0.000017  0.000000 ) 
 ( -0.000068  0.000000 -0.000155  0.000000 -0.000017  0.000000 ) 
 ( -0.000100  0.000000  0.000136  0.000000 -0.000017  0.000000 ) 
 (  0.000004  0.000000  0.000020  0.000000  0.000039  0.000000 ) 
 ( -0.000019  0.000000 -0.000006  0.000000  0.000039  0.000000 ) 
 (  0.000015  0.000000 -0.000013  0.000000  0.000039  0.000000 ) 
 ( -0.000015  0.000000 -0.000013  0.000000  0.000039  0.000000 ) 
 ( -0.000004  0.000000  0.000020  0.000000  0.000039  0.000000 ) 
 (  0.000019  0.000000 -0.000006  0.000000  0.000039  0.000000 ) 
 (  0.000001  0.000000  0.000025  0.000000  0.000032  0.000000 ) 
 ( -0.000022  0.000000 -0.000012  0.000000  0.000032  0.000000 ) 
 (  0.000021  0.000000 -0.000013  0.000000  0.000032  0.000000 ) 
 ( -0.000021  0.000000 -0.000013  0.000000  0.000032  0.000000 ) 
 ( -0.000001  0.000000  0.000025  0.000000  0.000032  0.000000 ) 
 (  0.000022  0.000000 -0.000012  0.000000  0.000032  0.000000 ) 
 ( -0.000001  0.000000  0.000023  0.000000  0.000035  0.000000 ) 
 ( -0.000019  0.000000 -0.000012  0.000000  0.000035  0.000000 ) 
 (  0.000020  0.000000 -0.000011  0.000000  0.000035  0.000000 ) 
 ( -0.000020  0.000000 -0.000011  0.000000  0.000035  0.000000 ) 
 (  0.000001  0.000000  0.000023  0.000000  0.000035  0.000000 ) 
 (  0.000019  0.000000 -0.000012  0.000000  0.000035  0.000000 ) 
 (  0.000000  0.000000  0.000000  0.000000  0.000693  0.000000 ) 
 ( -0.000000  0.000000  0.000000  0.000000  0.000773  0.000000 ) 
 ( -0.000000  0.000000 -0.000000  0.000000  0.000775  0.000000 ) 
 (  0.001067  0.000000  0.000616  0.000000  0.318613  0.000000 ) 
 ( -0.001067  0.000000  0.000616  0.000000  0.318613  0.000000 ) 
 ( -0.000000  0.000000 -0.001232  0.000000  0.318613  0.000000 ) 
 (  0.001146  0.000000  0.000662  0.000000  0.337683  0.000000 ) 
 ( -0.001146  0.000000  0.000662  0.000000  0.337683  0.000000 ) 
 (  0.000000  0.000000 -0.001324  0.000000  0.337683  0.000000 ) 
 (  0.001167  0.000000  0.000674  0.000000  0.341306  0.000000 ) 
 ( -0.001167  0.000000  0.000674  0.000000  0.341306  0.000000 ) 
 (  0.000000  0.000000 -0.001347  0.000000  0.341306  0.000000 ) 
     freq (  476) =     109.501598 [THz] =    3652.580153 [cm-1]
 (  0.000000  0.000000 -0.000000  0.000000 -0.000013  0.000000 ) 
 (  0.000000  0.000000 -0.000000  0.000000 -0.000050  0.000000 ) 
 ( -0.000000  0.000000 -0.000000  0.000000  0.000061  0.000000 ) 
 ( -0.000019  0.000000 -0.000011  0.000000  0.000020  0.000000 ) 
 (  0.000019  0.000000 -0.000011  0.000000  0.000020  0.000000 ) 
 ( -0.000000  0.000000  0.000022  0.000000  0.000020  0.000000 ) 
 ( -0.000052  0.000000 -0.000030  0.000000  0.000128  0.000000 ) 
 (  0.000052  0.000000 -0.000030  0.000000  0.000128  0.000000 ) 
 (  0.000000  0.000000  0.000060  0.000000  0.000128  0.000000 ) 
 (  0.000071  0.000000  0.000041  0.000000 -0.000144  0.000000 ) 
 ( -0.000071  0.000000  0.000041  0.000000 -0.000144  0.000000 ) 
 (  0.000000  0.000000 -0.000082  0.000000 -0.000144  0.000000 ) 
 ( -0.000004  0.000000 -0.000015  0.000000 -0.000046  0.000000 ) 
 (  0.000015  0.000000  0.000005  0.000000 -0.000046  0.000000 ) 
 ( -0.000012  0.000000  0.000011  0.000000 -0.000046  0.000000 ) 
 (  0.000012  0.000000  0.000011  0.000000 -0.000046  0.000000 ) 
 (  0.000004  0.000000 -0.000015  0.000000 -0.000046  0.000000 ) 
 ( -0.000015  0.000000  0.000005  0.000000 -0.000046  0.000000 ) 
 ( -0.000072  0.000000  0.000087  0.000000  0.000217  0.000000 ) 
 ( -0.000040  0.000000 -0.000106  0.000000  0.000217  0.000000 ) 
 (  0.000111  0.000000  0.000019  0.000000  0.000217  0.000000 ) 
 ( -0.000111  0.000000  0.000019  0.000000  0.000217  0.000000 ) 
 (  0.000072  0.000000  0.000087  0.000000  0.000217  0.000000 ) 
 (  0.000040  0.000000 -0.000106  0.000000  0.000217  0.000000 ) 
 (  0.000075  0.000000 -0.000069  0.000000 -0.000167  0.000000 ) 
 (  0.000022  0.000000  0.000099  0.000000 -0.000167  0.000000 ) 
 ( -0.000097  0.000000 -0.000030  0.000000 -0.000167  0.000000 ) 
 (  0.000097  0.000000 -0.000030  0.000000 -0.000167  0.000000 ) 
 ( -0.000075  0.000000 -0.000069  0.000000 -0.000167  0.000000 ) 
 ( -0.000022  0.000000  0.000099  0.000000 -0.000167  0.000000 ) 
 (  0.000020  0.000000 -0.000036  0.000000  0.000088  0.000000 ) 
 (  0.000021  0.000000  0.000035  0.000000  0.000088  0.000000 ) 
 ( -0.000041  0.000000  0.000001  0.000000  0.000088  0.000000 ) 
 (  0.000041  0.000000  0.000001  0.000000  0.000088  0.000000 ) 
 ( -0.000020  0.000000 -0.000036  0.000000  0.000088  0.000000 ) 
 ( -0.000021  0.000000  0.000035  0.000000  0.000088  0.000000 ) 
 (  0.000073  0.000000 -0.000146  0.000000  0.000098  0.000000 ) 
 (  0.000090  0.000000  0.000136  0.000000  0.000098  0.000000 ) 
 ( -0.000163  0.000000  0.000010  0.000000  0.000098  0.000000 ) 
 (  0.000163  0.000000  0.000010  0.000000  0.000098  0.000000 ) 
 ( -0.000073  0.000000 -0.000146  0.000000  0.000098  0.000000 ) 
 ( -0.000090  0.000000  0.000136  0.000000  0.000098  0.000000 ) 
 ( -0.000090  0.000000  0.000178  0.000000 -0.000183  0.000000 ) 
 ( -0.000109  0.000000 -0.000167  0.000000 -0.000183  0.000000 ) 
 (  0.000199  0.000000 -0.000011  0.000000 -0.000183  0.000000 ) 
 ( -0.000199  0.000000 -0.000011  0.000000 -0.000183  0.000000 ) 
 (  0.000090  0.000000  0.000178  0.000000 -0.000183  0.000000 ) 
 (  0.000109  0.000000 -0.000167  0.000000 -0.000183  0.000000 ) 
 ( -0.000000  0.000000  0.000041  0.000000 -0.000059  0.000000 ) 
 ( -0.000036  0.000000 -0.000021  0.000000 -0.000059  0.000000 ) 
 (  0.000036  0.000000 -0.000021  0.000000 -0.000059  0.000000 ) 
 ( -0.000000  0.000000 -0.000030  0.000000 -0.000009  0.000000 ) 
 (  0.000026  0.000000  0.000015  0.000000 -0.000009  0.000000 ) 
 ( -0.000026  0.000000  0.000015  0.000000 -0.000009  0.000000 ) 
 (  0.000000  0.000000 -0.000014  0.000000  0.000072  0.000000 ) 
 (  0.000012  0.000000  0.000007  0.000000  0.000072  0.000000 ) 
 ( -0.000012  0.000000  0.000007  0.000000  0.000072  0.000000 ) 
 ( -0.000000  0.000000  0.000000  0.000000  0.000032  0.000000 ) 
 ( -0.000000  0.000000  0.000000  0.000000  0.000001  0.000000 ) 
 (  0.000000  0.000000  0.000000  0.000000 -0.000031  0.000000 ) 
 (  0.000000  0.000000 -0.000011  0.000000  0.000014  0.000000 ) 
 (  0.000010  0.000000  0.000006  0.000000  0.000014  0.000000 ) 
 ( -0.000010  0.000000  0.000006  0.000000  0.000014  0.000000 ) 
 (  0.000000  0.000000  0.000018  0.000000  0.000006  0.000000 ) 
 ( -0.000016  0.000000 -0.000009  0.000000  0.000006  0.000000 ) 
 (  0.000016  0.000000 -0.000009  0.000000  0.000006  0.000000 ) 
 ( -0.000000  0.000000 -0.000006  0.000000 -0.000020  0.000000 ) 
 (  0.000005  0.000000  0.000003  0.000000 -0.000020  0.000000 ) 
 ( -0.000005  0.000000  0.000003  0.000000 -0.000020  0.000000 ) 
 (  0.000057  0.000000  0.000033  0.000000  0.006109  0.000000 ) 
 ( -0.000057  0.000000  0.000033  0.000000  0.006109  0.000000 ) 
 ( -0.000000  0.000000 -0.000066  0.000000  0.006109  0.000000 ) 
 (  0.000237  0.000000  0.000137  0.000000  0.022141  0.000000 ) 
 ( -0.000237  0.000000  0.000137  0.000000  0.022141  0.000000 ) 
 (  0.000000  0.000000 -0.000274  0.000000  0.022141  0.000000 ) 
 ( -0.000288  0.000000 -0.000166  0.000000 -0.027612  0.000000 ) 
 (  0.000288  0.000000 -0.000166  0.000000 -0.027612  0.000000 ) 
 ( -0.000000  0.000000  0.000333  0.000000 -0.027612  0.000000 ) 
 ( -0.000000  0.000000 -0.000021  0.000000 -0.000049  0.000000 ) 
 (  0.000019  0.000000  0.000011  0.000000 -0.000049  0.000000 ) 
 ( -0.000019  0.000000  0.000011  0.000000 -0.000049  0.000000 ) 
 ( -0.000000  0.000000  0.000065  0.000000 -0.000012  0.000000 ) 
 ( -0.000057  0.000000 -0.000033  0.000000 -0.000012  0.000000 ) 
 (  0.000057  0.000000 -0.000033  0.000000 -0.000012  0.000000 ) 
 (  0.000000  0.000000 -0.000041  0.000000  0.000061  0.000000 ) 
 (  0.000035  0.000000  0.000020  0.000000  0.000061  0.000000 ) 
 ( -0.000035  0.000000  0.000020  0.000000  0.000061  0.000000 ) 
 ( -0.000029  0.000000 -0.000017  0.000000 -0.000089  0.000000 ) 
 (  0.000029  0.000000 -0.000017  0.000000 -0.000089  0.000000 ) 
 (  0.000000  0.000000  0.000033  0.000000 -0.000089  0.000000 ) 
 ( -0.000102  0.000000 -0.000059  0.000000 -0.000258  0.000000 ) 
 (  0.000102  0.000000 -0.000059  0.000000 -0.000258  0.000000 ) 
 ( -0.000000  0.000000  0.000118  0.000000 -0.000258  0.000000 ) 
 (  0.000127  0.000000  0.000074  0.000000  0.000338  0.000000 ) 
 ( -0.000127  0.000000  0.000074  0.000000  0.000338  0.000000 ) 
 (  0.000000  0.000000 -0.000147  0.000000  0.000338  0.000000 ) 
 (  0.000017  0.000000  0.000045  0.000000 -0.000066  0.000000 ) 
 ( -0.000048  0.000000 -0.000008  0.000000 -0.000066  0.000000 ) 
 (  0.000031  0.000000 -0.000037  0.000000 -0.000066  0.000000 ) 
 ( -0.000031  0.000000 -0.000037  0.000000 -0.000066  0.000000 ) 
 ( -0.000017  0.000000  0.000045  0.000000 -0.000066  0.000000 ) 
 (  0.000048  0.000000 -0.000008  0.000000 -0.000066  0.000000 ) 
 (  0.000044  0.000000  0.000034  0.000000 -0.000185  0.000000 ) 
 ( -0.000052  0.000000  0.000021  0.000000 -0.000185  0.000000 ) 
 (  0.000008  0.000000 -0.000055  0.000000 -0.000185  0.000000 ) 
 ( -0.000008  0.000000 -0.000055  0.000000 -0.000185  0.000000 ) 
 ( -0.000044  0.000000  0.000034  0.000000 -0.000185  0.000000 ) 
 (  0.000052  0.000000  0.000021  0.000000 -0.000185  0.000000 ) 
 ( -0.000060  0.000000 -0.000078  0.000000  0.000246  0.000000 ) 
 (  0.000098  0.000000 -0.000012  0.000000  0.000246  0.000000 ) 
 ( -0.000038  0.000000  0.000091  0.000000  0.000246  0.000000 ) 
 (  0.000038  0.000000  0.000091  0.000000  0.000246  0.000000 ) 
 (  0.000060  0.000000 -0.000078  0.000000  0.000246  0.000000 ) 
 ( -0.000098  0.000000 -0.000012  0.000000  0.000246  0.000000 ) 
 (  0.000087  0.000000 -0.000019  0.000000 -0.000096  0.000000 ) 
 ( -0.000027  0.000000  0.000085  0.000000 -0.000096  0.000000 ) 
 ( -0.000060  0.000000 -0.000066  0.000000 -0.000096  0.000000 ) 
 (  0.000060  0.000000 -0.000066  0.000000 -0.000096  0.000000 ) 
 ( -0.000087  0.000000 -0.000019  0.000000 -0.000096  0.000000 ) 
 (  0.000027  0.000000  0.000085  0.000000 -0.000096  0.000000 ) 
 ( -0.000015  0.000000  0.000115  0.000000  0.000025  0.000000 ) 
 ( -0.000092  0.000000 -0.000071  0.000000  0.000025  0.000000 ) 
 (  0.000107  0.000000 -0.000044  0.000000  0.000025  0.000000 ) 
 ( -0.000107  0.000000 -0.000044  0.000000  0.000025  0.000000 ) 
 (  0.000015  0.000000  0.000115  0.000000  0.000025  0.000000 ) 
 (  0.000092  0.000000 -0.000071  0.000000  0.000025  0.000000 ) 
 ( -0.000074  0.000000 -0.000091  0.000000  0.000073  0.000000 ) 
 (  0.000116  0.000000 -0.000018  0.000000  0.000073  0.000000 ) 
 ( -0.000042  0.000000  0.000109  0.000000  0.000073  0.000000 ) 
 (  0.000042  0.000000  0.000109  0.000000  0.000073  0.000000 ) 
 (  0.000074  0.000000 -0.000091  0.000000  0.000073  0.000000 ) 
 ( -0.000116  0.000000 -0.000018  0.000000  0.000073  0.000000 ) 
 (  0.000034  0.000000 -0.000051  0.000000  0.000111  0.000000 ) 
 (  0.000027  0.000000  0.000055  0.000000  0.000111  0.000000 ) 
 ( -0.000061  0.000000 -0.000004  0.000000  0.000111  0.000000 ) 
 (  0.000061  0.000000 -0.000004  0.000000  0.000111  0.000000 ) 
 ( -0.000034  0.000000 -0.000051  0.000000  0.000111  0.000000 ) 
 ( -0.000027  0.000000  0.000055  0.000000  0.000111  0.000000 ) 
 (  0.000060  0.000000 -0.000035  0.000000  0.000004  0.000000 ) 
 (  0.000000  0.000000  0.000070  0.000000  0.000004  0.000000 ) 
 ( -0.000060  0.000000 -0.000035  0.000000  0.000004  0.000000 ) 
 (  0.000060  0.000000 -0.000035  0.000000  0.000004  0.000000 ) 
 ( -0.000060  0.000000 -0.000035  0.000000  0.000004  0.000000 ) 
 ( -0.000000  0.000000  0.000070  0.000000  0.000004  0.000000 ) 
 ( -0.000094  0.000000  0.000084  0.000000 -0.000114  0.000000 ) 
 ( -0.000025  0.000000 -0.000124  0.000000 -0.000114  0.000000 ) 
 (  0.000120  0.000000  0.000040  0.000000 -0.000114  0.000000 ) 
 ( -0.000120  0.000000  0.000040  0.000000 -0.000114  0.000000 ) 
 (  0.000094  0.000000  0.000084  0.000000 -0.000114  0.000000 ) 
 (  0.000025  0.000000 -0.000124  0.000000 -0.000114  0.000000 ) 
 (  0.000000  0.000000 -0.000000  0.000000 -0.000711  0.000000 ) 
 (  0.000000  0.000000 -0.000000  0.000000 -0.000938  0.000000 ) 
 ( -0.000000  0.000000 -0.000000  0.000000  0.001649  0.000000 ) 
 ( -0.000267  0.000000 -0.000154  0.000000 -0.097542  0.000000 ) 
 (  0.000267  0.000000 -0.000154  0.000000 -0.097542  0.000000 ) 
 ( -0.000000  0.000000  0.000308  0.000000 -0.097542  0.000000 ) 
 ( -0.001541  0.000000 -0.000890  0.000000 -0.355551  0.000000 ) 
 (  0.001541  0.000000 -0.000890  0.000000 -0.355551  0.000000 ) 
 ( -0.000000  0.000000  0.001780  0.000000 -0.355551  0.000000 ) 
 (  0.001778  0.000000  0.001026  0.000000  0.442834  0.000000 ) 
 ( -0.001778  0.000000  0.001026  0.000000  0.442834  0.000000 ) 
 (  0.000000  0.000000 -0.002053  0.000000  0.442834  0.000000 ) 
     freq (  477) =     109.502053 [THz] =    3652.595330 [cm-1]
 ( -0.000000  0.000000  0.000000  0.000000 -0.000068  0.000000 ) 
 ( -0.000000  0.000000 -0.000000  0.000000  0.000041  0.000000 ) 
 ( -0.000000  0.000000 -0.000000  0.000000  0.000021  0.000000 ) 
 ( -0.000071  0.000000 -0.000041  0.000000  0.000162  0.000000 ) 
 (  0.000071  0.000000 -0.000041  0.000000  0.000162  0.000000 ) 
 (  0.000000  0.000000  0.000082  0.000000  0.000162  0.000000 ) 
 (  0.000051  0.000000  0.000029  0.000000 -0.000091  0.000000 ) 
 ( -0.000051  0.000000  0.000029  0.000000 -0.000091  0.000000 ) 
 (  0.000000  0.000000 -0.000058  0.000000 -0.000091  0.000000 ) 
 (  0.000018  0.000000  0.000010  0.000000 -0.000060  0.000000 ) 
 ( -0.000018  0.000000  0.000010  0.000000 -0.000060  0.000000 ) 
 (  0.000000  0.000000 -0.000020  0.000000 -0.000060  0.000000 ) 
 ( -0.000085  0.000000  0.000094  0.000000  0.000225  0.000000 ) 
 ( -0.000039  0.000000 -0.000121  0.000000  0.000225  0.000000 ) 
 (  0.000124  0.000000  0.000027  0.000000  0.000225  0.000000 ) 
 ( -0.000124  0.000000  0.000027  0.000000  0.000225  0.000000 ) 
 (  0.000085  0.000000  0.000094  0.000000  0.000225  0.000000 ) 
 (  0.000039  0.000000 -0.000121  0.000000  0.000225  0.000000 ) 
 (  0.000044  0.000000 -0.000027  0.000000 -0.000067  0.000000 ) 
 (  0.000002  0.000000  0.000051  0.000000 -0.000067  0.000000 ) 
 ( -0.000046  0.000000 -0.000024  0.000000 -0.000067  0.000000 ) 
 (  0.000046  0.000000 -0.000024  0.000000 -0.000067  0.000000 ) 
 ( -0.000044  0.000000 -0.000027  0.000000 -0.000067  0.000000 ) 
 ( -0.000002  0.000000  0.000051  0.000000 -0.000067  0.000000 ) 
 (  0.000038  0.000000 -0.000056  0.000000 -0.000149  0.000000 ) 
 (  0.000030  0.000000  0.000061  0.000000 -0.000149  0.000000 ) 
 ( -0.000068  0.000000 -0.000005  0.000000 -0.000149  0.000000 ) 
 (  0.000068  0.000000 -0.000005  0.000000 -0.000149  0.000000 ) 
 ( -0.000038  0.000000 -0.000056  0.000000 -0.000149  0.000000 ) 
 ( -0.000030  0.000000  0.000061  0.000000 -0.000149  0.000000 ) 
 (  0.000096  0.000000 -0.000191  0.000000  0.000164  0.000000 ) 
 (  0.000117  0.000000  0.000178  0.000000  0.000164  0.000000 ) 
 ( -0.000213  0.000000  0.000012  0.000000  0.000164  0.000000 ) 
 (  0.000213  0.000000  0.000012  0.000000  0.000164  0.000000 ) 
 ( -0.000096  0.000000 -0.000191  0.000000  0.000164  0.000000 ) 
 ( -0.000117  0.000000  0.000178  0.000000  0.000164  0.000000 ) 
 ( -0.000062  0.000000  0.000119  0.000000 -0.000155  0.000000 ) 
 ( -0.000072  0.000000 -0.000113  0.000000 -0.000155  0.000000 ) 
 (  0.000134  0.000000 -0.000006  0.000000 -0.000155  0.000000 ) 
 ( -0.000134  0.000000 -0.000006  0.000000 -0.000155  0.000000 ) 
 (  0.000062  0.000000  0.000119  0.000000 -0.000155  0.000000 ) 
 (  0.000072  0.000000 -0.000113  0.000000 -0.000155  0.000000 ) 
 ( -0.000029  0.000000  0.000059  0.000000 -0.000003  0.000000 ) 
 ( -0.000037  0.000000 -0.000055  0.000000 -0.000003  0.000000 ) 
 (  0.000066  0.000000 -0.000005  0.000000 -0.000003  0.000000 ) 
 ( -0.000066  0.000000 -0.000005  0.000000 -0.000003  0.000000 ) 
 (  0.000029  0.000000  0.000059  0.000000 -0.000003  0.000000 ) 
 (  0.000037  0.000000 -0.000055  0.000000 -0.000003  0.000000 ) 
 (  0.000000  0.000000 -0.000010  0.000000 -0.000044  0.000000 ) 
 (  0.000009  0.000000  0.000005  0.000000 -0.000044  0.000000 ) 
 ( -0.000009  0.000000  0.000005  0.000000 -0.000044  0.000000 ) 
 (  0.000000  0.000000 -0.000031  0.000000  0.000073  0.000000 ) 
 (  0.000027  0.000000  0.000016  0.000000  0.000073  0.000000 ) 
 ( -0.000027  0.000000  0.000016  0.000000  0.000073  0.000000 ) 
 (  0.000000  0.000000  0.000042  0.000000 -0.000031  0.000000 ) 
 ( -0.000037  0.000000 -0.000021  0.000000 -0.000031  0.000000 ) 
 (  0.000037  0.000000 -0.000021  0.000000 -0.000031  0.000000 ) 
 (  0.000000  0.000000 -0.000000  0.000000  0.000019  0.000000 ) 
 (  0.000000  0.000000  0.000000  0.000000 -0.000037  0.000000 ) 
 (  0.000000  0.000000  0.000000  0.000000  0.000018  0.000000 ) 
 ( -0.000000  0.000000  0.000018  0.000000  0.000015  0.000000 ) 
 ( -0.000015  0.000000 -0.000009  0.000000  0.000015  0.000000 ) 
 (  0.000015  0.000000 -0.000009  0.000000  0.000015  0.000000 ) 
 ( -0.000000  0.000000  0.000004  0.000000 -0.000018  0.000000 ) 
 ( -0.000004  0.000000 -0.000002  0.000000 -0.000018  0.000000 ) 
 (  0.000004  0.000000 -0.000002  0.000000 -0.000018  0.000000 ) 
 ( -0.000000  0.000000 -0.000017  0.000000  0.000004  0.000000 ) 
 (  0.000015  0.000000  0.000009  0.000000  0.000004  0.000000 ) 
 ( -0.000015  0.000000  0.000009  0.000000  0.000004  0.000000 ) 
 (  0.000310  0.000000  0.000179  0.000000  0.029294  0.000000 ) 
 ( -0.000310  0.000000  0.000179  0.000000  0.029294  0.000000 ) 
 (  0.000000  0.000000 -0.000358  0.000000  0.029294  0.000000 ) 
 ( -0.000194  0.000000 -0.000112  0.000000 -0.018885  0.000000 ) 
 (  0.000194  0.000000 -0.000112  0.000000 -0.018885  0.000000 ) 
 (  0.000000  0.000000  0.000224  0.000000 -0.018885  0.000000 ) 
 ( -0.000099  0.000000 -0.000057  0.000000 -0.008661  0.000000 ) 
 (  0.000099  0.000000 -0.000057  0.000000 -0.008661  0.000000 ) 
 (  0.000000  0.000000  0.000114  0.000000 -0.008661  0.000000 ) 
 (  0.000000  0.000000  0.000064  0.000000 -0.000043  0.000000 ) 
 ( -0.000056  0.000000 -0.000032  0.000000 -0.000043  0.000000 ) 
 (  0.000056  0.000000 -0.000032  0.000000 -0.000043  0.000000 ) 
 (  0.000000  0.000000 -0.000010  0.000000  0.000063  0.000000 ) 
 (  0.000008  0.000000  0.000005  0.000000  0.000063  0.000000 ) 
 ( -0.000008  0.000000  0.000005  0.000000  0.000063  0.000000 ) 
 (  0.000000  0.000000 -0.000047  0.000000 -0.000022  0.000000 ) 
 (  0.000041  0.000000  0.000024  0.000000 -0.000022  0.000000 ) 
 ( -0.000041  0.000000  0.000024  0.000000 -0.000022  0.000000 ) 
 ( -0.000134  0.000000 -0.000078  0.000000 -0.000351  0.000000 ) 
 (  0.000134  0.000000 -0.000078  0.000000 -0.000351  0.000000 ) 
 (  0.000000  0.000000  0.000155  0.000000 -0.000351  0.000000 ) 
 (  0.000087  0.000000  0.000050  0.000000  0.000238  0.000000 ) 
 ( -0.000087  0.000000  0.000050  0.000000  0.000238  0.000000 ) 
 (  0.000000  0.000000 -0.000101  0.000000  0.000238  0.000000 ) 
 (  0.000039  0.000000  0.000023  0.000000  0.000091  0.000000 ) 
 ( -0.000039  0.000000  0.000023  0.000000  0.000091  0.000000 ) 
 (  0.000000  0.000000 -0.000045  0.000000  0.000091  0.000000 ) 
 (  0.000061  0.000000  0.000067  0.000000 -0.000251  0.000000 ) 
 ( -0.000089  0.000000  0.000019  0.000000 -0.000251  0.000000 ) 
 (  0.000028  0.000000 -0.000087  0.000000 -0.000251  0.000000 ) 
 ( -0.000028  0.000000 -0.000087  0.000000 -0.000251  0.000000 ) 
 ( -0.000061  0.000000  0.000067  0.000000 -0.000251  0.000000 ) 
 (  0.000089  0.000000  0.000019  0.000000 -0.000251  0.000000 ) 
 ( -0.000044  0.000000 -0.000070  0.000000  0.000177  0.000000 ) 
 (  0.000083  0.000000 -0.000003  0.000000  0.000177  0.000000 ) 
 ( -0.000039  0.000000  0.000073  0.000000  0.000177  0.000000 ) 
 (  0.000039  0.000000  0.000073  0.000000  0.000177  0.000000 ) 
 (  0.000044  0.000000 -0.000070  0.000000  0.000177  0.000000 ) 
 ( -0.000083  0.000000 -0.000003  0.000000  0.000177  0.000000 ) 
 ( -0.000014  0.000000  0.000007  0.000000  0.000063  0.000000 ) 
 (  0.000001  0.000000 -0.000015  0.000000  0.000063  0.000000 ) 
 (  0.000013  0.000000  0.000009  0.000000  0.000063  0.000000 ) 
 ( -0.000013  0.000000  0.000009  0.000000  0.000063  0.000000 ) 
 (  0.000014  0.000000  0.000007  0.000000  0.000063  0.000000 ) 
 ( -0.000001  0.000000 -0.000015  0.000000  0.000063  0.000000 ) 
 (  0.000033  0.000000  0.000124  0.000000 -0.000029  0.000000 ) 
 ( -0.000123  0.000000 -0.000033  0.000000 -0.000029  0.000000 ) 
 (  0.000091  0.000000 -0.000090  0.000000 -0.000029  0.000000 ) 
 ( -0.000091  0.000000 -0.000090  0.000000 -0.000029  0.000000 ) 
 ( -0.000033  0.000000  0.000124  0.000000 -0.000029  0.000000 ) 
 (  0.000123  0.000000 -0.000033  0.000000 -0.000029  0.000000 ) 
 ( -0.000095  0.000000 -0.000038  0.000000  0.000099  0.000000 ) 
 (  0.000081  0.000000 -0.000063  0.000000  0.000099  0.000000 ) 
 (  0.000014  0.000000  0.000102  0.000000  0.000099  0.000000 ) 
 ( -0.000014  0.000000  0.000102  0.000000  0.000099  0.000000 ) 
 (  0.000095  0.000000 -0.000038  0.000000  0.000099  0.000000 ) 
 ( -0.000081  0.000000 -0.000063  0.000000  0.000099  0.000000 ) 
 (  0.000056  0.000000 -0.000073  0.000000 -0.000069  0.000000 ) 
 (  0.000035  0.000000  0.000085  0.000000 -0.000069  0.000000 ) 
 ( -0.000091  0.000000 -0.000012  0.000000 -0.000069  0.000000 ) 
 (  0.000091  0.000000 -0.000012  0.000000 -0.000069  0.000000 ) 
 ( -0.000056  0.000000 -0.000073  0.000000 -0.000069  0.000000 ) 
 ( -0.000035  0.000000  0.000085  0.000000 -0.000069  0.000000 ) 
 (  0.000090  0.000000 -0.000069  0.000000  0.000067  0.000000 ) 
 (  0.000015  0.000000  0.000112  0.000000  0.000067  0.000000 ) 
 ( -0.000105  0.000000 -0.000043  0.000000  0.000067  0.000000 ) 
 (  0.000105  0.000000 -0.000043  0.000000  0.000067  0.000000 ) 
 ( -0.000090  0.000000 -0.000069  0.000000  0.000067  0.000000 ) 
 ( -0.000015  0.000000  0.000112  0.000000  0.000067  0.000000 ) 
 ( -0.000075  0.000000  0.000078  0.000000 -0.000132  0.000000 ) 
 ( -0.000030  0.000000 -0.000104  0.000000 -0.000132  0.000000 ) 
 (  0.000105  0.000000  0.000026  0.000000 -0.000132  0.000000 ) 
 ( -0.000105  0.000000  0.000026  0.000000 -0.000132  0.000000 ) 
 (  0.000075  0.000000  0.000078  0.000000 -0.000132  0.000000 ) 
 (  0.000030  0.000000 -0.000104  0.000000 -0.000132  0.000000 ) 
 ( -0.000015  0.000000 -0.000010  0.000000  0.000060  0.000000 ) 
 (  0.000016  0.000000 -0.000009  0.000000  0.000060  0.000000 ) 
 ( -0.000001  0.000000  0.000018  0.000000  0.000060  0.000000 ) 
 (  0.000001  0.000000  0.000018  0.000000  0.000060  0.000000 ) 
 (  0.000015  0.000000 -0.000010  0.000000  0.000060  0.000000 ) 
 ( -0.000016  0.000000 -0.000009  0.000000  0.000060  0.000000 ) 
 ( -0.000000  0.000000  0.000000  0.000000 -0.001478  0.000000 ) 
 ( -0.000000  0.000000 -0.000000  0.000000  0.001367  0.000000 ) 
 ( -0.000000  0.000000 -0.000000  0.000000  0.000089  0.000000 ) 
 ( -0.001936  0.000000 -0.001117  0.000000 -0.470111  0.000000 ) 
 (  0.001936  0.000000 -0.001117  0.000000 -0.470111  0.000000 ) 
 ( -0.000000  0.000000  0.002235  0.000000 -0.470111  0.000000 ) 
 (  0.001151  0.000000  0.000665  0.000000  0.302633  0.000000 ) 
 ( -0.001151  0.000000  0.000665  0.000000  0.302633  0.000000 ) 
 ( -0.000000  0.000000 -0.001329  0.000000  0.302633  0.000000 ) 
 (  0.000701  0.000000  0.000405  0.000000  0.139434  0.000000 ) 
 ( -0.000701  0.000000  0.000405  0.000000  0.139434  0.000000 ) 
 ( -0.000000  0.000000 -0.000809  0.000000  0.139434  0.000000 ) 
     freq (  478) =     109.506271 [THz] =    3652.736020 [cm-1]
 ( -0.000001  0.000000  0.000048  0.000000  0.000000  0.000000 ) 
 (  0.000000  0.000000 -0.000004  0.000000 -0.000000  0.000000 ) 
 (  0.000000  0.000000 -0.000008  0.000000  0.000000  0.000000 ) 
 ( -0.000050  0.000000 -0.000042  0.000000  0.000104  0.000000 ) 
 (  0.000052  0.000000 -0.000043  0.000000  0.000108  0.000000 ) 
 (  0.000000  0.000000 -0.000130  0.000000 -0.000212  0.000000 ) 
 (  0.000010  0.000000  0.000016  0.000000 -0.000031  0.000000 ) 
 ( -0.000011  0.000000  0.000016  0.000000 -0.000032  0.000000 ) 
 ( -0.000000  0.000000  0.000034  0.000000  0.000063  0.000000 ) 
 (  0.000006  0.000000 -0.000003  0.000000 -0.000006  0.000000 ) 
 ( -0.000006  0.000000 -0.000003  0.000000 -0.000006  0.000000 ) 
 (  0.000000  0.000000  0.000007  0.000000  0.000012  0.000000 ) 
 ( -0.000061  0.000000  0.000099  0.000000  0.000170  0.000000 ) 
 ( -0.000054  0.000000 -0.000098  0.000000  0.000122  0.000000 ) 
 ( -0.000228  0.000000 -0.000006  0.000000 -0.000292  0.000000 ) 
 (  0.000228  0.000000 -0.000006  0.000000 -0.000292  0.000000 ) 
 (  0.000064  0.000000  0.000102  0.000000  0.000176  0.000000 ) 
 (  0.000052  0.000000 -0.000094  0.000000  0.000116  0.000000 ) 
 (  0.000017  0.000000 -0.000077  0.000000 -0.000090  0.000000 ) 
 ( -0.000011  0.000000  0.000014  0.000000 -0.000021  0.000000 ) 
 (  0.000082  0.000000 -0.000007  0.000000  0.000112  0.000000 ) 
 ( -0.000081  0.000000 -0.000007  0.000000  0.000111  0.000000 ) 
 ( -0.000018  0.000000 -0.000078  0.000000 -0.000092  0.000000 ) 
 (  0.000012  0.000000  0.000013  0.000000 -0.000019  0.000000 ) 
 (  0.000017  0.000000  0.000013  0.000000 -0.000036  0.000000 ) 
 (  0.000029  0.000000 -0.000002  0.000000  0.000071  0.000000 ) 
 (  0.000010  0.000000 -0.000005  0.000000 -0.000036  0.000000 ) 
 ( -0.000010  0.000000 -0.000005  0.000000 -0.000037  0.000000 ) 
 ( -0.000017  0.000000  0.000012  0.000000 -0.000034  0.000000 ) 
 ( -0.000029  0.000000 -0.000002  0.000000  0.000071  0.000000 ) 
 (  0.000077  0.000000 -0.000141  0.000000  0.000114  0.000000 ) 
 (  0.000053  0.000000  0.000226  0.000000  0.000110  0.000000 ) 
 (  0.000383  0.000000  0.000064  0.000000 -0.000223  0.000000 ) 
 ( -0.000383  0.000000  0.000065  0.000000 -0.000223  0.000000 ) 
 ( -0.000082  0.000000 -0.000146  0.000000  0.000118  0.000000 ) 
 ( -0.000050  0.000000  0.000220  0.000000  0.000105  0.000000 ) 
 ( -0.000023  0.000000  0.000075  0.000000  0.000046  0.000000 ) 
 (  0.000006  0.000000 -0.000041  0.000000 -0.000063  0.000000 ) 
 ( -0.000109  0.000000 -0.000007  0.000000  0.000017  0.000000 ) 
 (  0.000108  0.000000 -0.000008  0.000000  0.000018  0.000000 ) 
 (  0.000024  0.000000  0.000076  0.000000  0.000045  0.000000 ) 
 ( -0.000007  0.000000 -0.000039  0.000000 -0.000063  0.000000 ) 
 ( -0.000005  0.000000 -0.000006  0.000000 -0.000027  0.000000 ) 
 ( -0.000019  0.000000 -0.000023  0.000000 -0.000008  0.000000 ) 
 ( -0.000027  0.000000 -0.000003  0.000000  0.000034  0.000000 ) 
 (  0.000027  0.000000 -0.000003  0.000000  0.000034  0.000000 ) 
 (  0.000005  0.000000 -0.000006  0.000000 -0.000027  0.000000 ) 
 (  0.000019  0.000000 -0.000023  0.000000 -0.000007  0.000000 ) 
 (  0.000002  0.000000 -0.000010  0.000000 -0.000016  0.000000 ) 
 (  0.000096  0.000000 -0.000176  0.000000  0.000008  0.000000 ) 
 ( -0.000094  0.000000 -0.000174  0.000000  0.000008  0.000000 ) 
 ( -0.000001  0.000000  0.000115  0.000000 -0.000090  0.000000 ) 
 (  0.000015  0.000000  0.000086  0.000000  0.000044  0.000000 ) 
 ( -0.000017  0.000000  0.000087  0.000000  0.000046  0.000000 ) 
 (  0.000000  0.000000 -0.000025  0.000000  0.000027  0.000000 ) 
 ( -0.000006  0.000000 -0.000014  0.000000 -0.000013  0.000000 ) 
 (  0.000006  0.000000 -0.000015  0.000000 -0.000014  0.000000 ) 
 (  0.000000  0.000000 -0.000030  0.000000  0.000000  0.000000 ) 
 ( -0.000000  0.000000  0.000001  0.000000 -0.000000  0.000000 ) 
 ( -0.000000  0.000000  0.000004  0.000000 -0.000000  0.000000 ) 
 ( -0.000002  0.000000  0.000010  0.000000  0.000013  0.000000 ) 
 ( -0.000063  0.000000  0.000119  0.000000 -0.000006  0.000000 ) 
 (  0.000062  0.000000  0.000118  0.000000 -0.000007  0.000000 ) 
 (  0.000001  0.000000 -0.000048  0.000000  0.000015  0.000000 ) 
 (  0.000001  0.000000 -0.000048  0.000000 -0.000007  0.000000 ) 
 (  0.000000  0.000000 -0.000048  0.000000 -0.000007  0.000000 ) 
 (  0.000000  0.000000  0.000009  0.000000 -0.000003  0.000000 ) 
 (  0.000007  0.000000 -0.000003  0.000000  0.000002  0.000000 ) 
 ( -0.000007  0.000000 -0.000003  0.000000  0.000002  0.000000 ) 
 (  0.000237  0.000000  0.000142  0.000000  0.024023  0.000000 ) 
 ( -0.000246  0.000000  0.000148  0.000000  0.024935  0.000000 ) 
 ( -0.000000  0.000000  0.000563  0.000000 -0.048958  0.000000 ) 
 ( -0.000054  0.000000 -0.000050  0.000000 -0.006435  0.000000 ) 
 (  0.000057  0.000000 -0.000051  0.000000 -0.006679  0.000000 ) 
 (  0.000000  0.000000 -0.000147  0.000000  0.013114  0.000000 ) 
 ( -0.000006  0.000000 -0.000021  0.000000 -0.001836  0.000000 ) 
 (  0.000007  0.000000 -0.000022  0.000000 -0.001905  0.000000 ) 
 (  0.000000  0.000000 -0.000032  0.000000  0.003741  0.000000 ) 
 (  0.000003  0.000000  0.000059  0.000000 -0.000020  0.000000 ) 
 (  0.000148  0.000000 -0.000198  0.000000  0.000010  0.000000 ) 
 ( -0.000147  0.000000 -0.000195  0.000000  0.000010  0.000000 ) 
 ( -0.000001  0.000000 -0.000096  0.000000 -0.000055  0.000000 ) 
 ( -0.000069  0.000000  0.000026  0.000000  0.000027  0.000000 ) 
 (  0.000071  0.000000  0.000024  0.000000  0.000028  0.000000 ) 
 ( -0.000000  0.000000  0.000020  0.000000  0.000018  0.000000 ) 
 (  0.000001  0.000000  0.000018  0.000000 -0.000009  0.000000 ) 
 ( -0.000002  0.000000  0.000018  0.000000 -0.000009  0.000000 ) 
 ( -0.000109  0.000000 -0.000104  0.000000 -0.000285  0.000000 ) 
 (  0.000114  0.000000 -0.000106  0.000000 -0.000296  0.000000 ) 
 (  0.000000  0.000000 -0.000298  0.000000  0.000582  0.000000 ) 
 (  0.000055  0.000000 -0.000021  0.000000  0.000072  0.000000 ) 
 ( -0.000056  0.000000 -0.000020  0.000000  0.000075  0.000000 ) 
 (  0.000001  0.000000  0.000075  0.000000 -0.000147  0.000000 ) 
 ( -0.000004  0.000000  0.000027  0.000000  0.000025  0.000000 ) 
 (  0.000003  0.000000  0.000027  0.000000  0.000026  0.000000 ) 
 ( -0.000000  0.000000  0.000021  0.000000 -0.000051  0.000000 ) 
 (  0.000048  0.000000  0.000040  0.000000 -0.000188  0.000000 ) 
 ( -0.000063  0.000000  0.000004  0.000000 -0.000163  0.000000 ) 
 ( -0.000039  0.000000  0.000118  0.000000  0.000351  0.000000 ) 
 (  0.000039  0.000000  0.000118  0.000000  0.000351  0.000000 ) 
 ( -0.000050  0.000000  0.000042  0.000000 -0.000194  0.000000 ) 
 (  0.000060  0.000000  0.000003  0.000000 -0.000156  0.000000 ) 
 ( -0.000021  0.000000  0.000012  0.000000  0.000033  0.000000 ) 
 (  0.000023  0.000000  0.000007  0.000000  0.000053  0.000000 ) 
 ( -0.000004  0.000000 -0.000029  0.000000 -0.000086  0.000000 ) 
 (  0.000003  0.000000 -0.000029  0.000000 -0.000086  0.000000 ) 
 (  0.000021  0.000000  0.000012  0.000000  0.000035  0.000000 ) 
 ( -0.000023  0.000000  0.000007  0.000000  0.000052  0.000000 ) 
 (  0.000001  0.000000 -0.000000  0.000000  0.000017  0.000000 ) 
 (  0.000022  0.000000 -0.000005  0.000000  0.000012  0.000000 ) 
 (  0.000008  0.000000 -0.000021  0.000000 -0.000029  0.000000 ) 
 ( -0.000008  0.000000 -0.000021  0.000000 -0.000029  0.000000 ) 
 ( -0.000000  0.000000 -0.000001  0.000000  0.000018  0.000000 ) 
 ( -0.000022  0.000000 -0.000005  0.000000  0.000011  0.000000 ) 
 ( -0.000016  0.000000  0.000111  0.000000 -0.000010  0.000000 ) 
 ( -0.000067  0.000000 -0.000070  0.000000 -0.000039  0.000000 ) 
 ( -0.000198  0.000000  0.000065  0.000000  0.000050  0.000000 ) 
 (  0.000198  0.000000  0.000065  0.000000  0.000050  0.000000 ) 
 (  0.000017  0.000000  0.000115  0.000000 -0.000012  0.000000 ) 
 (  0.000064  0.000000 -0.000067  0.000000 -0.000039  0.000000 ) 
 (  0.000156  0.000000 -0.000144  0.000000 -0.000113  0.000000 ) 
 ( -0.000000  0.000000 -0.000077  0.000000  0.000064  0.000000 ) 
 (  0.000136  0.000000  0.000025  0.000000  0.000049  0.000000 ) 
 ( -0.000133  0.000000  0.000023  0.000000  0.000047  0.000000 ) 
 ( -0.000156  0.000000 -0.000145  0.000000 -0.000113  0.000000 ) 
 (  0.000001  0.000000 -0.000081  0.000000  0.000066  0.000000 ) 
 ( -0.000039  0.000000  0.000036  0.000000  0.000015  0.000000 ) 
 (  0.000029  0.000000  0.000036  0.000000  0.000024  0.000000 ) 
 ( -0.000005  0.000000 -0.000023  0.000000 -0.000040  0.000000 ) 
 (  0.000004  0.000000 -0.000023  0.000000 -0.000040  0.000000 ) 
 (  0.000039  0.000000  0.000036  0.000000  0.000016  0.000000 ) 
 ( -0.000029  0.000000  0.000037  0.000000  0.000024  0.000000 ) 
 (  0.000042  0.000000 -0.000047  0.000000  0.000021  0.000000 ) 
 ( -0.000023  0.000000  0.000118  0.000000  0.000036  0.000000 ) 
 (  0.000153  0.000000  0.000092  0.000000 -0.000057  0.000000 ) 
 ( -0.000153  0.000000  0.000093  0.000000 -0.000057  0.000000 ) 
 ( -0.000046  0.000000 -0.000049  0.000000  0.000022  0.000000 ) 
 (  0.000023  0.000000  0.000115  0.000000  0.000035  0.000000 ) 
 (  0.000050  0.000000 -0.000067  0.000000  0.000155  0.000000 ) 
 ( -0.000006  0.000000 -0.000083  0.000000 -0.000086  0.000000 ) 
 (  0.000008  0.000000 -0.000027  0.000000 -0.000069  0.000000 ) 
 ( -0.000006  0.000000 -0.000027  0.000000 -0.000066  0.000000 ) 
 ( -0.000048  0.000000 -0.000066  0.000000  0.000154  0.000000 ) 
 (  0.000007  0.000000 -0.000084  0.000000 -0.000089  0.000000 ) 
 ( -0.000033  0.000000  0.000025  0.000000 -0.000041  0.000000 ) 
 ( -0.000019  0.000000  0.000031  0.000000  0.000006  0.000000 ) 
 ( -0.000021  0.000000  0.000016  0.000000  0.000035  0.000000 ) 
 (  0.000020  0.000000  0.000017  0.000000  0.000034  0.000000 ) 
 (  0.000032  0.000000  0.000025  0.000000 -0.000041  0.000000 ) 
 (  0.000019  0.000000  0.000032  0.000000  0.000007  0.000000 ) 
 ( -0.000009  0.000000  0.000822  0.000000 -0.000000  0.000000 ) 
 (  0.000001  0.000000 -0.000125  0.000000 -0.000000  0.000000 ) 
 (  0.000001  0.000000 -0.000097  0.000000  0.000000  0.000000 ) 
 ( -0.001426  0.000000 -0.001025  0.000000 -0.385175  0.000000 ) 
 (  0.001484  0.000000 -0.001056  0.000000 -0.399797  0.000000 ) 
 (  0.000002  0.000000 -0.003561  0.000000  0.784972  0.000000 ) 
 (  0.000326  0.000000  0.000316  0.000000  0.103221  0.000000 ) 
 ( -0.000342  0.000000  0.000323  0.000000  0.107140  0.000000 ) 
 ( -0.000001  0.000000  0.000898  0.000000 -0.210360  0.000000 ) 
 ( -0.000025  0.000000  0.000147  0.000000  0.029265  0.000000 ) 
 (  0.000022  0.000000  0.000146  0.000000  0.030376  0.000000 ) 
 ( -0.000002  0.000000  0.000106  0.000000 -0.059641  0.000000 ) 
     freq (  479) =     109.506271 [THz] =    3652.736020 [cm-1]
 (  0.000048  0.000000  0.000001  0.000000 -0.000000  0.000000 ) 
 ( -0.000004  0.000000 -0.000000  0.000000  0.000000  0.000000 ) 
 ( -0.000008  0.000000 -0.000000  0.000000  0.000000  0.000000 ) 
 ( -0.000101  0.000000 -0.000051  0.000000  0.000185  0.000000 ) 
 ( -0.000100  0.000000  0.000050  0.000000 -0.000183  0.000000 ) 
 ( -0.000013  0.000000 -0.000001  0.000000 -0.000002  0.000000 ) 
 (  0.000028  0.000000  0.000011  0.000000 -0.000055  0.000000 ) 
 (  0.000028  0.000000 -0.000010  0.000000  0.000054  0.000000 ) 
 (  0.000010  0.000000  0.000000  0.000000  0.000001  0.000000 ) 
 (  0.000004  0.000000  0.000006  0.000000 -0.000010  0.000000 ) 
 (  0.000004  0.000000 -0.000006  0.000000  0.000010  0.000000 ) 
 ( -0.000007  0.000000  0.000000  0.000000  0.000000  0.000000 ) 
 ( -0.000102  0.000000  0.000168  0.000000  0.000239  0.000000 ) 
 (  0.000095  0.000000  0.000175  0.000000 -0.000267  0.000000 ) 
 (  0.000003  0.000000  0.000001  0.000000  0.000028  0.000000 ) 
 (  0.000008  0.000000 -0.000001  0.000000 -0.000034  0.000000 ) 
 ( -0.000101  0.000000 -0.000165  0.000000 -0.000235  0.000000 ) 
 (  0.000096  0.000000 -0.000177  0.000000  0.000270  0.000000 ) 
 (  0.000030  0.000000 -0.000042  0.000000 -0.000077  0.000000 ) 
 ( -0.000061  0.000000 -0.000070  0.000000  0.000117  0.000000 ) 
 ( -0.000040  0.000000  0.000023  0.000000 -0.000040  0.000000 ) 
 ( -0.000041  0.000000 -0.000024  0.000000  0.000042  0.000000 ) 
 (  0.000030  0.000000  0.000040  0.000000  0.000075  0.000000 ) 
 ( -0.000061  0.000000  0.000070  0.000000 -0.000117  0.000000 ) 
 ( -0.000009  0.000000 -0.000020  0.000000  0.000062  0.000000 ) 
 (  0.000006  0.000000 -0.000009  0.000000 -0.000000  0.000000 ) 
 (  0.000009  0.000000 -0.000027  0.000000 -0.000062  0.000000 ) 
 (  0.000009  0.000000  0.000027  0.000000  0.000061  0.000000 ) 
 ( -0.000009  0.000000  0.000021  0.000000 -0.000062  0.000000 ) 
 (  0.000006  0.000000  0.000009  0.000000  0.000002  0.000000 ) 
 (  0.000240  0.000000 -0.000264  0.000000  0.000192  0.000000 ) 
 ( -0.000126  0.000000 -0.000289  0.000000 -0.000194  0.000000 ) 
 (  0.000036  0.000000  0.000041  0.000000  0.000002  0.000000 ) 
 (  0.000027  0.000000 -0.000040  0.000000 -0.000007  0.000000 ) 
 (  0.000239  0.000000  0.000261  0.000000 -0.000190  0.000000 ) 
 ( -0.000128  0.000000  0.000294  0.000000  0.000197  0.000000 ) 
 ( -0.000057  0.000000  0.000061  0.000000 -0.000046  0.000000 ) 
 (  0.000059  0.000000  0.000089  0.000000 -0.000016  0.000000 ) 
 (  0.000025  0.000000 -0.000025  0.000000  0.000063  0.000000 ) 
 (  0.000028  0.000000  0.000025  0.000000 -0.000062  0.000000 ) 
 ( -0.000056  0.000000 -0.000059  0.000000  0.000047  0.000000 ) 
 (  0.000058  0.000000 -0.000090  0.000000  0.000015  0.000000 ) 
 ( -0.000015  0.000000  0.000029  0.000000 -0.000024  0.000000 ) 
 (  0.000002  0.000000  0.000015  0.000000  0.000035  0.000000 ) 
 ( -0.000019  0.000000  0.000007  0.000000 -0.000011  0.000000 ) 
 ( -0.000018  0.000000 -0.000007  0.000000  0.000012  0.000000 ) 
 ( -0.000015  0.000000 -0.000029  0.000000  0.000024  0.000000 ) 
 (  0.000002  0.000000 -0.000015  0.000000 -0.000035  0.000000 ) 
 ( -0.000230  0.000000 -0.000000  0.000000 -0.000000  0.000000 ) 
 ( -0.000064  0.000000  0.000093  0.000000  0.000014  0.000000 ) 
 ( -0.000066  0.000000 -0.000097  0.000000 -0.000014  0.000000 ) 
 (  0.000077  0.000000  0.000001  0.000000 -0.000001  0.000000 ) 
 (  0.000105  0.000000  0.000017  0.000000  0.000079  0.000000 ) 
 (  0.000105  0.000000 -0.000015  0.000000 -0.000078  0.000000 ) 
 ( -0.000011  0.000000 -0.000000  0.000000  0.000000  0.000000 ) 
 ( -0.000022  0.000000 -0.000006  0.000000 -0.000024  0.000000 ) 
 ( -0.000021  0.000000  0.000006  0.000000  0.000023  0.000000 ) 
 ( -0.000030  0.000000 -0.000000  0.000000  0.000000  0.000000 ) 
 (  0.000001  0.000000  0.000000  0.000000 -0.000000  0.000000 ) 
 (  0.000004  0.000000  0.000000  0.000000  0.000000  0.000000 ) 
 (  0.000155  0.000000  0.000000  0.000000  0.000000  0.000000 ) 
 (  0.000046  0.000000 -0.000061  0.000000 -0.000011  0.000000 ) 
 (  0.000047  0.000000  0.000064  0.000000  0.000011  0.000000 ) 
 ( -0.000049  0.000000 -0.000001  0.000000  0.000000  0.000000 ) 
 ( -0.000048  0.000000 -0.000000  0.000000 -0.000013  0.000000 ) 
 ( -0.000048  0.000000 -0.000001  0.000000  0.000013  0.000000 ) 
 ( -0.000007  0.000000  0.000000  0.000000 -0.000000  0.000000 ) 
 (  0.000005  0.000000  0.000007  0.000000  0.000003  0.000000 ) 
 (  0.000005  0.000000 -0.000007  0.000000 -0.000003  0.000000 ) 
 (  0.000426  0.000000  0.000243  0.000000  0.042662  0.000000 ) 
 (  0.000421  0.000000 -0.000240  0.000000 -0.042135  0.000000 ) 
 (  0.000006  0.000000  0.000006  0.000000 -0.000527  0.000000 ) 
 ( -0.000115  0.000000 -0.000056  0.000000 -0.011428  0.000000 ) 
 ( -0.000114  0.000000  0.000055  0.000000  0.011287  0.000000 ) 
 ( -0.000018  0.000000 -0.000002  0.000000  0.000141  0.000000 ) 
 ( -0.000029  0.000000 -0.000006  0.000000 -0.003260  0.000000 ) 
 ( -0.000029  0.000000  0.000006  0.000000  0.003220  0.000000 ) 
 ( -0.000018  0.000000 -0.000000  0.000000  0.000040  0.000000 ) 
 ( -0.000281  0.000000  0.000001  0.000000 -0.000000  0.000000 ) 
 ( -0.000024  0.000000  0.000145  0.000000  0.000017  0.000000 ) 
 ( -0.000027  0.000000 -0.000150  0.000000 -0.000017  0.000000 ) 
 (  0.000066  0.000000 -0.000001  0.000000 -0.000001  0.000000 ) 
 ( -0.000057  0.000000 -0.000070  0.000000  0.000048  0.000000 ) 
 ( -0.000055  0.000000  0.000070  0.000000 -0.000048  0.000000 ) 
 (  0.000017  0.000000  0.000000  0.000000  0.000000  0.000000 ) 
 (  0.000019  0.000000  0.000002  0.000000 -0.000015  0.000000 ) 
 (  0.000019  0.000000 -0.000001  0.000000  0.000015  0.000000 ) 
 ( -0.000235  0.000000 -0.000113  0.000000 -0.000507  0.000000 ) 
 ( -0.000232  0.000000  0.000110  0.000000  0.000501  0.000000 ) 
 ( -0.000040  0.000000 -0.000003  0.000000  0.000006  0.000000 ) 
 (  0.000044  0.000000  0.000055  0.000000  0.000128  0.000000 ) 
 (  0.000043  0.000000 -0.000056  0.000000 -0.000127  0.000000 ) 
 ( -0.000053  0.000000  0.000001  0.000000 -0.000002  0.000000 ) 
 (  0.000023  0.000000 -0.000003  0.000000  0.000044  0.000000 ) 
 (  0.000023  0.000000  0.000004  0.000000 -0.000044  0.000000 ) 
 (  0.000029  0.000000  0.000000  0.000000 -0.000001  0.000000 ) 
 (  0.000068  0.000000  0.000084  0.000000 -0.000297  0.000000 ) 
 (  0.000104  0.000000 -0.000027  0.000000  0.000311  0.000000 ) 
 ( -0.000010  0.000000 -0.000003  0.000000 -0.000015  0.000000 ) 
 ( -0.000009  0.000000  0.000006  0.000000  0.000022  0.000000 ) 
 (  0.000067  0.000000 -0.000083  0.000000  0.000293  0.000000 ) 
 (  0.000106  0.000000  0.000027  0.000000 -0.000315  0.000000 ) 
 ( -0.000019  0.000000 -0.000020  0.000000  0.000081  0.000000 ) 
 ( -0.000013  0.000000  0.000024  0.000000 -0.000069  0.000000 ) 
 (  0.000022  0.000000 -0.000003  0.000000 -0.000012  0.000000 ) 
 (  0.000022  0.000000  0.000002  0.000000  0.000010  0.000000 ) 
 ( -0.000019  0.000000  0.000020  0.000000 -0.000080  0.000000 ) 
 ( -0.000014  0.000000 -0.000024  0.000000  0.000070  0.000000 ) 
 ( -0.000017  0.000000 -0.000020  0.000000  0.000024  0.000000 ) 
 ( -0.000013  0.000000  0.000002  0.000000 -0.000027  0.000000 ) 
 (  0.000004  0.000000 -0.000013  0.000000  0.000003  0.000000 ) 
 (  0.000004  0.000000  0.000012  0.000000 -0.000004  0.000000 ) 
 ( -0.000017  0.000000  0.000020  0.000000 -0.000023  0.000000 ) 
 ( -0.000013  0.000000 -0.000002  0.000000  0.000027  0.000000 ) 
 ( -0.000040  0.000000  0.000171  0.000000 -0.000051  0.000000 ) 
 (  0.000141  0.000000  0.000120  0.000000  0.000035  0.000000 ) 
 (  0.000006  0.000000 -0.000011  0.000000  0.000017  0.000000 ) 
 (  0.000010  0.000000  0.000013  0.000000 -0.000016  0.000000 ) 
 ( -0.000040  0.000000 -0.000169  0.000000  0.000051  0.000000 ) 
 (  0.000142  0.000000 -0.000122  0.000000 -0.000036  0.000000 ) 
 (  0.000013  0.000000 -0.000039  0.000000  0.000009  0.000000 ) 
 ( -0.000054  0.000000 -0.000195  0.000000  0.000094  0.000000 ) 
 ( -0.000156  0.000000 -0.000058  0.000000 -0.000103  0.000000 ) 
 ( -0.000158  0.000000  0.000059  0.000000  0.000104  0.000000 ) 
 (  0.000010  0.000000  0.000035  0.000000 -0.000011  0.000000 ) 
 ( -0.000054  0.000000  0.000193  0.000000 -0.000092  0.000000 ) 
 ( -0.000003  0.000000 -0.000029  0.000000  0.000037  0.000000 ) 
 ( -0.000003  0.000000  0.000039  0.000000 -0.000032  0.000000 ) 
 (  0.000056  0.000000  0.000005  0.000000 -0.000005  0.000000 ) 
 (  0.000056  0.000000 -0.000005  0.000000  0.000004  0.000000 ) 
 ( -0.000002  0.000000  0.000030  0.000000 -0.000037  0.000000 ) 
 ( -0.000004  0.000000 -0.000038  0.000000  0.000032  0.000000 ) 
 (  0.000156  0.000000 -0.000072  0.000000  0.000053  0.000000 ) 
 ( -0.000010  0.000000 -0.000138  0.000000 -0.000045  0.000000 ) 
 (  0.000016  0.000000  0.000038  0.000000 -0.000009  0.000000 ) 
 (  0.000013  0.000000 -0.000036  0.000000  0.000007  0.000000 ) 
 (  0.000155  0.000000  0.000071  0.000000 -0.000053  0.000000 ) 
 ( -0.000009  0.000000  0.000140  0.000000  0.000046  0.000000 ) 
 ( -0.000051  0.000000  0.000015  0.000000 -0.000010  0.000000 ) 
 ( -0.000035  0.000000 -0.000040  0.000000 -0.000129  0.000000 ) 
 ( -0.000091  0.000000 -0.000026  0.000000  0.000139  0.000000 ) 
 ( -0.000091  0.000000  0.000026  0.000000 -0.000140  0.000000 ) 
 ( -0.000052  0.000000 -0.000017  0.000000  0.000013  0.000000 ) 
 ( -0.000034  0.000000  0.000038  0.000000  0.000127  0.000000 ) 
 (  0.000024  0.000000  0.000016  0.000000 -0.000016  0.000000 ) 
 (  0.000017  0.000000  0.000029  0.000000  0.000044  0.000000 ) 
 (  0.000032  0.000000  0.000028  0.000000 -0.000027  0.000000 ) 
 (  0.000032  0.000000 -0.000028  0.000000  0.000028  0.000000 ) 
 (  0.000024  0.000000 -0.000015  0.000000  0.000016  0.000000 ) 
 (  0.000017  0.000000 -0.000028  0.000000 -0.000044  0.000000 ) 
 (  0.000822  0.000000  0.000009  0.000000 -0.000000  0.000000 ) 
 ( -0.000125  0.000000 -0.000001  0.000000  0.000000  0.000000 ) 
 ( -0.000097  0.000000 -0.000001  0.000000 -0.000000  0.000000 ) 
 ( -0.002736  0.000000 -0.001466  0.000000 -0.684027  0.000000 ) 
 ( -0.002705  0.000000  0.001444  0.000000  0.675585  0.000000 ) 
 ( -0.000200  0.000000 -0.000038  0.000000  0.008442  0.000000 ) 
 (  0.000709  0.000000  0.000337  0.000000  0.183309  0.000000 ) 
 (  0.000702  0.000000 -0.000331  0.000000 -0.181046  0.000000 ) 
 (  0.000127  0.000000  0.000010  0.000000 -0.002262  0.000000 ) 
 (  0.000119  0.000000 -0.000022  0.000000  0.051972  0.000000 ) 
 (  0.000120  0.000000  0.000025  0.000000 -0.051330  0.000000 ) 
 (  0.000160  0.000000  0.000001  0.000000 -0.000641  0.000000 ) 
     freq (  480) =     109.514136 [THz] =    3652.998358 [cm-1]
 ( -0.000004  0.000000 -0.000007  0.000000  0.000000  0.000000 ) 
 ( -0.000023  0.000000 -0.000045  0.000000  0.000000  0.000000 ) 
 (  0.000001  0.000000  0.000001  0.000000 -0.000000  0.000000 ) 
 (  0.000022  0.000000  0.000019  0.000000 -0.000046  0.000000 ) 
 (  0.000004  0.000000  0.000009  0.000000 -0.000003  0.000000 ) 
 (  0.000004  0.000000  0.000030  0.000000  0.000049  0.000000 ) 
 (  0.000086  0.000000  0.000055  0.000000 -0.000172  0.000000 ) 
 ( -0.000001  0.000000  0.000010  0.000000 -0.000009  0.000000 ) 
 (  0.000004  0.000000  0.000107  0.000000  0.000182  0.000000 ) 
 ( -0.000025  0.000000 -0.000021  0.000000  0.000053  0.000000 ) 
 ( -0.000004  0.000000 -0.000010  0.000000  0.000003  0.000000 ) 
 ( -0.000005  0.000000 -0.000034  0.000000 -0.000056  0.000000 ) 
 (  0.000021  0.000000 -0.000051  0.000000 -0.000078  0.000000 ) 
 ( -0.000027  0.000000  0.000009  0.000000 -0.000062  0.000000 ) 
 (  0.000049  0.000000  0.000021  0.000000  0.000140  0.000000 ) 
 ( -0.000057  0.000000 -0.000004  0.000000  0.000089  0.000000 ) 
 (  0.000018  0.000000 -0.000023  0.000000  0.000050  0.000000 ) 
 ( -0.000003  0.000000  0.000051  0.000000 -0.000138  0.000000 ) 
 (  0.000099  0.000000 -0.000140  0.000000 -0.000242  0.000000 ) 
 (  0.000014  0.000000  0.000013  0.000000  0.000002  0.000000 ) 
 (  0.000189  0.000000  0.000010  0.000000  0.000241  0.000000 ) 
 ( -0.000181  0.000000  0.000016  0.000000  0.000254  0.000000 ) 
 ( -0.000007  0.000000  0.000003  0.000000 -0.000027  0.000000 ) 
 ( -0.000083  0.000000  0.000161  0.000000 -0.000227  0.000000 ) 
 ( -0.000031  0.000000  0.000087  0.000000  0.000116  0.000000 ) 
 (  0.000030  0.000000  0.000022  0.000000 -0.000059  0.000000 ) 
 ( -0.000057  0.000000  0.000002  0.000000 -0.000056  0.000000 ) 
 (  0.000091  0.000000  0.000016  0.000000 -0.000115  0.000000 ) 
 (  0.000007  0.000000  0.000044  0.000000  0.000068  0.000000 ) 
 (  0.000025  0.000000 -0.000043  0.000000  0.000047  0.000000 ) 
 ( -0.000046  0.000000  0.000071  0.000000 -0.000027  0.000000 ) 
 (  0.000020  0.000000 -0.000007  0.000000 -0.000010  0.000000 ) 
 ( -0.000080  0.000000 -0.000025  0.000000  0.000037  0.000000 ) 
 (  0.000088  0.000000 -0.000007  0.000000  0.000029  0.000000 ) 
 ( -0.000010  0.000000  0.000021  0.000000  0.000007  0.000000 ) 
 (  0.000015  0.000000 -0.000078  0.000000 -0.000036  0.000000 ) 
 ( -0.000177  0.000000  0.000232  0.000000 -0.000207  0.000000 ) 
 (  0.000003  0.000000 -0.000069  0.000000  0.000014  0.000000 ) 
 ( -0.000348  0.000000 -0.000075  0.000000  0.000192  0.000000 ) 
 (  0.000310  0.000000 -0.000043  0.000000  0.000215  0.000000 ) 
 ( -0.000039  0.000000 -0.000006  0.000000 -0.000035  0.000000 ) 
 (  0.000103  0.000000 -0.000327  0.000000 -0.000180  0.000000 ) 
 (  0.000047  0.000000 -0.000094  0.000000 -0.000015  0.000000 ) 
 ( -0.000029  0.000000 -0.000003  0.000000  0.000064  0.000000 ) 
 (  0.000087  0.000000  0.000017  0.000000 -0.000048  0.000000 ) 
 ( -0.000108  0.000000 -0.000005  0.000000  0.000009  0.000000 ) 
 (  0.000006  0.000000 -0.000035  0.000000 -0.000062  0.000000 ) 
 ( -0.000024  0.000000  0.000079  0.000000  0.000052  0.000000 ) 
 (  0.000039  0.000000  0.000026  0.000000 -0.000018  0.000000 ) 
 ( -0.000002  0.000000  0.000052  0.000000  0.000017  0.000000 ) 
 (  0.000042  0.000000  0.000075  0.000000  0.000001  0.000000 ) 
 (  0.000101  0.000000 -0.000024  0.000000  0.000041  0.000000 ) 
 ( -0.000079  0.000000  0.000092  0.000000 -0.000039  0.000000 ) 
 (  0.000111  0.000000  0.000190  0.000000 -0.000002  0.000000 ) 
 ( -0.000033  0.000000 -0.000099  0.000000  0.000077  0.000000 ) 
 ( -0.000062  0.000000 -0.000080  0.000000 -0.000073  0.000000 ) 
 ( -0.000031  0.000000 -0.000064  0.000000 -0.000004  0.000000 ) 
 (  0.000003  0.000000  0.000005  0.000000 -0.000000  0.000000 ) 
 (  0.000016  0.000000  0.000031  0.000000  0.000000  0.000000 ) 
 ( -0.000003  0.000000 -0.000005  0.000000 -0.000000  0.000000 ) 
 ( -0.000019  0.000000 -0.000009  0.000000 -0.000000  0.000000 ) 
 (  0.000004  0.000000 -0.000024  0.000000  0.000000  0.000000 ) 
 ( -0.000021  0.000000 -0.000037  0.000000  0.000000  0.000000 ) 
 ( -0.000069  0.000000  0.000008  0.000000 -0.000017  0.000000 ) 
 (  0.000047  0.000000 -0.000067  0.000000  0.000016  0.000000 ) 
 ( -0.000076  0.000000 -0.000130  0.000000  0.000001  0.000000 ) 
 (  0.000021  0.000000  0.000032  0.000000 -0.000006  0.000000 ) 
 (  0.000014  0.000000  0.000036  0.000000  0.000006  0.000000 ) 
 (  0.000021  0.000000  0.000040  0.000000  0.000000  0.000000 ) 
 ( -0.000112  0.000000 -0.000052  0.000000 -0.009863  0.000000 ) 
 (  0.000016  0.000000  0.000015  0.000000 -0.000540  0.000000 ) 
 (  0.000010  0.000000 -0.000129  0.000000  0.010403  0.000000 ) 
 ( -0.000394  0.000000 -0.000230  0.000000 -0.040090  0.000000 ) 
 (  0.000019  0.000000 -0.000017  0.000000 -0.002195  0.000000 ) 
 ( -0.000002  0.000000 -0.000481  0.000000  0.042285  0.000000 ) 
 (  0.000102  0.000000  0.000072  0.000000  0.011289  0.000000 ) 
 (  0.000004  0.000000  0.000021  0.000000  0.000618  0.000000 ) 
 (  0.000009  0.000000  0.000131  0.000000 -0.011907  0.000000 ) 
 (  0.000034  0.000000 -0.000031  0.000000 -0.000010  0.000000 ) 
 ( -0.000045  0.000000  0.000020  0.000000  0.000009  0.000000 ) 
 (  0.000038  0.000000  0.000063  0.000000  0.000001  0.000000 ) 
 (  0.000133  0.000000 -0.000028  0.000000  0.000031  0.000000 ) 
 ( -0.000101  0.000000  0.000122  0.000000 -0.000030  0.000000 ) 
 (  0.000145  0.000000  0.000249  0.000000 -0.000002  0.000000 ) 
 ( -0.000030  0.000000  0.000078  0.000000  0.000050  0.000000 ) 
 (  0.000082  0.000000  0.000006  0.000000 -0.000047  0.000000 ) 
 ( -0.000036  0.000000 -0.000055  0.000000 -0.000003  0.000000 ) 
 (  0.000057  0.000000  0.000023  0.000000  0.000111  0.000000 ) 
 ( -0.000011  0.000000 -0.000012  0.000000  0.000006  0.000000 ) 
 ( -0.000007  0.000000  0.000064  0.000000 -0.000117  0.000000 ) 
 (  0.000198  0.000000  0.000151  0.000000  0.000476  0.000000 ) 
 (  0.000017  0.000000  0.000057  0.000000  0.000026  0.000000 ) 
 (  0.000027  0.000000  0.000261  0.000000 -0.000502  0.000000 ) 
 ( -0.000067  0.000000 -0.000016  0.000000 -0.000128  0.000000 ) 
 (  0.000021  0.000000  0.000029  0.000000 -0.000007  0.000000 ) 
 (  0.000016  0.000000 -0.000070  0.000000  0.000135  0.000000 ) 
 ( -0.000017  0.000000 -0.000012  0.000000  0.000070  0.000000 ) 
 ( -0.000011  0.000000  0.000007  0.000000  0.000001  0.000000 ) 
 (  0.000003  0.000000 -0.000007  0.000000 -0.000071  0.000000 ) 
 ( -0.000002  0.000000 -0.000020  0.000000 -0.000074  0.000000 ) 
 (  0.000013  0.000000 -0.000007  0.000000  0.000007  0.000000 ) 
 ( -0.000006  0.000000 -0.000001  0.000000  0.000067  0.000000 ) 
 ( -0.000074  0.000000 -0.000074  0.000000  0.000312  0.000000 ) 
 ( -0.000000  0.000000  0.000008  0.000000 -0.000006  0.000000 ) 
 (  0.000034  0.000000 -0.000097  0.000000 -0.000306  0.000000 ) 
 ( -0.000029  0.000000 -0.000106  0.000000 -0.000327  0.000000 ) 
 (  0.000015  0.000000 -0.000004  0.000000  0.000039  0.000000 ) 
 ( -0.000095  0.000000 -0.000017  0.000000  0.000288  0.000000 ) 
 (  0.000028  0.000000 -0.000003  0.000000 -0.000068  0.000000 ) 
 ( -0.000021  0.000000 -0.000021  0.000000 -0.000014  0.000000 ) 
 ( -0.000012  0.000000  0.000031  0.000000  0.000082  0.000000 ) 
 ( -0.000014  0.000000  0.000025  0.000000  0.000073  0.000000 ) 
 ( -0.000010  0.000000 -0.000027  0.000000  0.000006  0.000000 ) 
 (  0.000033  0.000000  0.000003  0.000000 -0.000079  0.000000 ) 
 (  0.000042  0.000000 -0.000070  0.000000 -0.000020  0.000000 ) 
 ( -0.000021  0.000000 -0.000045  0.000000 -0.000005  0.000000 ) 
 (  0.000032  0.000000 -0.000003  0.000000  0.000025  0.000000 ) 
 ( -0.000080  0.000000  0.000001  0.000000  0.000021  0.000000 ) 
 ( -0.000031  0.000000 -0.000045  0.000000  0.000003  0.000000 ) 
 ( -0.000015  0.000000  0.000020  0.000000 -0.000024  0.000000 ) 
 ( -0.000011  0.000000 -0.000143  0.000000  0.000058  0.000000 ) 
 ( -0.000000  0.000000  0.000056  0.000000 -0.000010  0.000000 ) 
 (  0.000167  0.000000 -0.000052  0.000000 -0.000048  0.000000 ) 
 ( -0.000130  0.000000 -0.000082  0.000000 -0.000060  0.000000 ) 
 (  0.000047  0.000000  0.000011  0.000000  0.000016  0.000000 ) 
 ( -0.000121  0.000000  0.000118  0.000000  0.000044  0.000000 ) 
 ( -0.000135  0.000000  0.000145  0.000000  0.000088  0.000000 ) 
 (  0.000027  0.000000  0.000148  0.000000 -0.000105  0.000000 ) 
 ( -0.000052  0.000000  0.000007  0.000000  0.000017  0.000000 ) 
 (  0.000187  0.000000 -0.000041  0.000000 -0.000081  0.000000 ) 
 (  0.000122  0.000000  0.000107  0.000000  0.000109  0.000000 ) 
 (  0.000027  0.000000 -0.000023  0.000000 -0.000027  0.000000 ) 
 ( -0.000020  0.000000 -0.000001  0.000000  0.000027  0.000000 ) 
 (  0.000024  0.000000 -0.000053  0.000000 -0.000024  0.000000 ) 
 ( -0.000043  0.000000 -0.000064  0.000000 -0.000003  0.000000 ) 
 (  0.000013  0.000000 -0.000023  0.000000 -0.000026  0.000000 ) 
 ( -0.000052  0.000000 -0.000005  0.000000  0.000026  0.000000 ) 
 ( -0.000035  0.000000 -0.000071  0.000000  0.000000  0.000000 ) 
 ( -0.000125  0.000000  0.000097  0.000000 -0.000086  0.000000 ) 
 (  0.000030  0.000000 -0.000008  0.000000  0.000031  0.000000 ) 
 ( -0.000139  0.000000 -0.000090  0.000000  0.000055  0.000000 ) 
 (  0.000153  0.000000 -0.000066  0.000000  0.000087  0.000000 ) 
 ( -0.000008  0.000000  0.000031  0.000000 -0.000038  0.000000 ) 
 ( -0.000012  0.000000 -0.000157  0.000000 -0.000048  0.000000 ) 
 ( -0.000019  0.000000  0.000053  0.000000 -0.000128  0.000000 ) 
 (  0.000033  0.000000  0.000082  0.000000  0.000138  0.000000 ) 
 (  0.000032  0.000000  0.000023  0.000000 -0.000010  0.000000 ) 
 (  0.000049  0.000000  0.000012  0.000000  0.000120  0.000000 ) 
 (  0.000053  0.000000  0.000071  0.000000 -0.000144  0.000000 ) 
 (  0.000000  0.000000  0.000045  0.000000  0.000024  0.000000 ) 
 ( -0.000075  0.000000 -0.000146  0.000000  0.000000  0.000000 ) 
 ( -0.000378  0.000000 -0.000730  0.000000  0.000000  0.000000 ) 
 (  0.000059  0.000000  0.000114  0.000000 -0.000000  0.000000 ) 
 (  0.000768  0.000000  0.000372  0.000000  0.158469  0.000000 ) 
 ( -0.000098  0.000000 -0.000076  0.000000  0.008675  0.000000 ) 
 ( -0.000053  0.000000  0.000897  0.000000 -0.167144  0.000000 ) 
 (  0.002382  0.000000  0.001368  0.000000  0.642627  0.000000 ) 
 ( -0.000136  0.000000  0.000065  0.000000  0.035179  0.000000 ) 
 ( -0.000006  0.000000  0.002897  0.000000 -0.677806  0.000000 ) 
 ( -0.000583  0.000000 -0.000468  0.000000 -0.181057  0.000000 ) 
 ( -0.000070  0.000000 -0.000202  0.000000 -0.009912  0.000000 ) 
 ( -0.000097  0.000000 -0.000779  0.000000  0.190968  0.000000 ) 
     freq (  481) =     109.514136 [THz] =    3652.998358 [cm-1]
 (  0.000007  0.000000 -0.000004  0.000000  0.000000  0.000000 ) 
 (  0.000045  0.000000 -0.000023  0.000000  0.000000  0.000000 ) 
 ( -0.000001  0.000000  0.000001  0.000000 -0.000000  0.000000 ) 
 ( -0.000020  0.000000 -0.000002  0.000000  0.000030  0.000000 ) 
 ( -0.000030  0.000000  0.000017  0.000000 -0.000055  0.000000 ) 
 ( -0.000009  0.000000  0.000016  0.000000  0.000025  0.000000 ) 
 ( -0.000060  0.000000 -0.000027  0.000000  0.000110  0.000000 ) 
 ( -0.000105  0.000000  0.000060  0.000000 -0.000205  0.000000 ) 
 ( -0.000007  0.000000  0.000056  0.000000  0.000094  0.000000 ) 
 (  0.000022  0.000000  0.000002  0.000000 -0.000034  0.000000 ) 
 (  0.000033  0.000000 -0.000019  0.000000  0.000062  0.000000 ) 
 (  0.000010  0.000000 -0.000018  0.000000 -0.000029  0.000000 ) 
 ( -0.000037  0.000000  0.000008  0.000000  0.000116  0.000000 ) 
 (  0.000023  0.000000  0.000056  0.000000 -0.000126  0.000000 ) 
 (  0.000035  0.000000 -0.000020  0.000000  0.000009  0.000000 ) 
 ( -0.000020  0.000000  0.000028  0.000000  0.000109  0.000000 ) 
 ( -0.000039  0.000000 -0.000046  0.000000 -0.000131  0.000000 ) 
 (  0.000035  0.000000 -0.000025  0.000000  0.000022  0.000000 ) 
 ( -0.000062  0.000000  0.000103  0.000000  0.000138  0.000000 ) 
 (  0.000091  0.000000  0.000188  0.000000 -0.000279  0.000000 ) 
 (  0.000088  0.000000  0.000013  0.000000  0.000141  0.000000 ) 
 ( -0.000103  0.000000  0.000001  0.000000  0.000115  0.000000 ) 
 ( -0.000117  0.000000 -0.000174  0.000000 -0.000278  0.000000 ) 
 (  0.000041  0.000000 -0.000098  0.000000  0.000162  0.000000 ) 
 (  0.000013  0.000000 -0.000008  0.000000  0.000002  0.000000 ) 
 ( -0.000052  0.000000 -0.000068  0.000000  0.000099  0.000000 ) 
 ( -0.000072  0.000000  0.000018  0.000000 -0.000101  0.000000 ) 
 (  0.000005  0.000000 -0.000009  0.000000  0.000012  0.000000 ) 
 (  0.000033  0.000000  0.000075  0.000000  0.000093  0.000000 ) 
 ( -0.000054  0.000000  0.000057  0.000000 -0.000106  0.000000 ) 
 (  0.000045  0.000000 -0.000024  0.000000  0.000027  0.000000 ) 
 ( -0.000033  0.000000 -0.000091  0.000000 -0.000037  0.000000 ) 
 ( -0.000051  0.000000  0.000009  0.000000  0.000009  0.000000 ) 
 (  0.000036  0.000000 -0.000026  0.000000  0.000025  0.000000 ) 
 (  0.000063  0.000000  0.000072  0.000000 -0.000037  0.000000 ) 
 ( -0.000035  0.000000  0.000047  0.000000  0.000013  0.000000 ) 
 (  0.000173  0.000000 -0.000171  0.000000  0.000103  0.000000 ) 
 ( -0.000128  0.000000 -0.000351  0.000000 -0.000230  0.000000 ) 
 ( -0.000133  0.000000 -0.000000  0.000000  0.000128  0.000000 ) 
 (  0.000207  0.000000 -0.000061  0.000000  0.000083  0.000000 ) 
 (  0.000245  0.000000  0.000288  0.000000 -0.000228  0.000000 ) 
 ( -0.000076  0.000000  0.000146  0.000000  0.000145  0.000000 ) 
 ( -0.000040  0.000000  0.000023  0.000000 -0.000065  0.000000 ) 
 (  0.000050  0.000000  0.000099  0.000000  0.000019  0.000000 ) 
 (  0.000071  0.000000 -0.000017  0.000000  0.000046  0.000000 ) 
 ( -0.000030  0.000000  0.000024  0.000000 -0.000066  0.000000 ) 
 ( -0.000061  0.000000 -0.000090  0.000000  0.000025  0.000000 ) 
 (  0.000053  0.000000 -0.000060  0.000000  0.000041  0.000000 ) 
 ( -0.000076  0.000000  0.000013  0.000000 -0.000009  0.000000 ) 
 ( -0.000050  0.000000  0.000055  0.000000 -0.000011  0.000000 ) 
 ( -0.000027  0.000000  0.000011  0.000000  0.000021  0.000000 ) 
 ( -0.000196  0.000000 -0.000012  0.000000  0.000021  0.000000 ) 
 ( -0.000080  0.000000  0.000168  0.000000  0.000025  0.000000 ) 
 (  0.000018  0.000000 -0.000022  0.000000 -0.000046  0.000000 ) 
 (  0.000063  0.000000 -0.000051  0.000000  0.000040  0.000000 ) 
 (  0.000082  0.000000 -0.000022  0.000000  0.000047  0.000000 ) 
 (  0.000098  0.000000 -0.000053  0.000000 -0.000087  0.000000 ) 
 ( -0.000005  0.000000  0.000003  0.000000 -0.000000  0.000000 ) 
 ( -0.000031  0.000000  0.000016  0.000000 -0.000000  0.000000 ) 
 (  0.000005  0.000000 -0.000003  0.000000  0.000000  0.000000 ) 
 (  0.000038  0.000000 -0.000005  0.000000 -0.000000  0.000000 ) 
 (  0.000022  0.000000 -0.000028  0.000000 -0.000000  0.000000 ) 
 (  0.000010  0.000000 -0.000003  0.000000  0.000000  0.000000 ) 
 (  0.000134  0.000000  0.000004  0.000000 -0.000009  0.000000 ) 
 (  0.000059  0.000000 -0.000112  0.000000 -0.000010  0.000000 ) 
 ( -0.000004  0.000000  0.000010  0.000000  0.000019  0.000000 ) 
 ( -0.000040  0.000000  0.000016  0.000000 -0.000003  0.000000 ) 
 ( -0.000036  0.000000  0.000023  0.000000 -0.000004  0.000000 ) 
 ( -0.000032  0.000000  0.000016  0.000000  0.000007  0.000000 ) 
 (  0.000059  0.000000  0.000054  0.000000  0.006318  0.000000 ) 
 (  0.000125  0.000000 -0.000073  0.000000 -0.011701  0.000000 ) 
 ( -0.000018  0.000000 -0.000067  0.000000  0.005383  0.000000 ) 
 (  0.000255  0.000000  0.000142  0.000000  0.025680  0.000000 ) 
 (  0.000469  0.000000 -0.000270  0.000000 -0.047559  0.000000 ) 
 (  0.000004  0.000000 -0.000249  0.000000  0.021879  0.000000 ) 
 ( -0.000077  0.000000 -0.000025  0.000000 -0.007231  0.000000 ) 
 ( -0.000128  0.000000  0.000073  0.000000  0.013392  0.000000 ) 
 ( -0.000018  0.000000  0.000068  0.000000 -0.006161  0.000000 ) 
 ( -0.000065  0.000000 -0.000016  0.000000 -0.000005  0.000000 ) 
 ( -0.000015  0.000000  0.000063  0.000000 -0.000006  0.000000 ) 
 (  0.000028  0.000000 -0.000020  0.000000  0.000011  0.000000 ) 
 ( -0.000256  0.000000 -0.000015  0.000000  0.000016  0.000000 ) 
 ( -0.000107  0.000000  0.000219  0.000000  0.000019  0.000000 ) 
 (  0.000021  0.000000 -0.000027  0.000000 -0.000035  0.000000 ) 
 (  0.000059  0.000000  0.000041  0.000000  0.000026  0.000000 ) 
 ( -0.000013  0.000000 -0.000072  0.000000  0.000030  0.000000 ) 
 ( -0.000075  0.000000  0.000047  0.000000 -0.000056  0.000000 ) 
 ( -0.000027  0.000000 -0.000031  0.000000 -0.000071  0.000000 ) 
 ( -0.000062  0.000000  0.000037  0.000000  0.000131  0.000000 ) 
 (  0.000014  0.000000  0.000033  0.000000 -0.000060  0.000000 ) 
 ( -0.000162  0.000000 -0.000037  0.000000 -0.000305  0.000000 ) 
 ( -0.000255  0.000000  0.000144  0.000000  0.000565  0.000000 ) 
 ( -0.000052  0.000000  0.000135  0.000000 -0.000260  0.000000 ) 
 (  0.000022  0.000000  0.000047  0.000000  0.000082  0.000000 ) 
 (  0.000067  0.000000 -0.000041  0.000000 -0.000151  0.000000 ) 
 ( -0.000032  0.000000 -0.000036  0.000000  0.000070  0.000000 ) 
 ( -0.000004  0.000000  0.000000  0.000000 -0.000042  0.000000 ) 
 (  0.000015  0.000000 -0.000006  0.000000  0.000082  0.000000 ) 
 (  0.000000  0.000000 -0.000019  0.000000 -0.000040  0.000000 ) 
 ( -0.000002  0.000000  0.000005  0.000000 -0.000035  0.000000 ) 
 (  0.000011  0.000000 -0.000009  0.000000  0.000081  0.000000 ) 
 (  0.000017  0.000000  0.000009  0.000000 -0.000047  0.000000 ) 
 (  0.000035  0.000000  0.000047  0.000000 -0.000173  0.000000 ) 
 (  0.000117  0.000000 -0.000027  0.000000  0.000357  0.000000 ) 
 (  0.000012  0.000000 -0.000061  0.000000 -0.000184  0.000000 ) 
 ( -0.000021  0.000000 -0.000044  0.000000 -0.000143  0.000000 ) 
 (  0.000080  0.000000 -0.000088  0.000000  0.000355  0.000000 ) 
 (  0.000068  0.000000  0.000022  0.000000 -0.000211  0.000000 ) 
 ( -0.000007  0.000000 -0.000031  0.000000  0.000056  0.000000 ) 
 ( -0.000026  0.000000  0.000018  0.000000 -0.000087  0.000000 ) 
 (  0.000026  0.000000  0.000009  0.000000  0.000031  0.000000 ) 
 (  0.000025  0.000000  0.000020  0.000000  0.000049  0.000000 ) 
 ( -0.000028  0.000000  0.000016  0.000000 -0.000088  0.000000 ) 
 (  0.000002  0.000000 -0.000027  0.000000  0.000039  0.000000 ) 
 (  0.000009  0.000000 -0.000006  0.000000  0.000017  0.000000 ) 
 (  0.000034  0.000000  0.000056  0.000000 -0.000026  0.000000 ) 
 (  0.000075  0.000000  0.000003  0.000000  0.000009  0.000000 ) 
 (  0.000017  0.000000 -0.000004  0.000000  0.000015  0.000000 ) 
 ( -0.000029  0.000000 -0.000053  0.000000 -0.000026  0.000000 ) 
 (  0.000036  0.000000 -0.000069  0.000000  0.000011  0.000000 ) 
 ( -0.000051  0.000000  0.000115  0.000000 -0.000022  0.000000 ) 
 (  0.000149  0.000000  0.000105  0.000000  0.000061  0.000000 ) 
 (  0.000041  0.000000 -0.000063  0.000000 -0.000039  0.000000 ) 
 ( -0.000113  0.000000 -0.000006  0.000000 -0.000016  0.000000 ) 
 ( -0.000021  0.000000 -0.000183  0.000000  0.000060  0.000000 ) 
 (  0.000087  0.000000 -0.000014  0.000000 -0.000044  0.000000 ) 
 ( -0.000055  0.000000  0.000028  0.000000  0.000071  0.000000 ) 
 ( -0.000052  0.000000 -0.000133  0.000000  0.000041  0.000000 ) 
 ( -0.000193  0.000000 -0.000055  0.000000 -0.000112  0.000000 ) 
 ( -0.000069  0.000000  0.000037  0.000000  0.000079  0.000000 ) 
 (  0.000078  0.000000  0.000102  0.000000  0.000031  0.000000 ) 
 ( -0.000052  0.000000  0.000197  0.000000 -0.000110  0.000000 ) 
 (  0.000078  0.000000 -0.000006  0.000000  0.000012  0.000000 ) 
 (  0.000026  0.000000 -0.000050  0.000000  0.000018  0.000000 ) 
 (  0.000014  0.000000  0.000017  0.000000 -0.000030  0.000000 ) 
 (  0.000043  0.000000 -0.000062  0.000000  0.000015  0.000000 ) 
 (  0.000061  0.000000  0.000003  0.000000  0.000015  0.000000 ) 
 ( -0.000005  0.000000 -0.000014  0.000000 -0.000030  0.000000 ) 
 (  0.000098  0.000000 -0.000031  0.000000  0.000014  0.000000 ) 
 ( -0.000007  0.000000 -0.000186  0.000000 -0.000081  0.000000 ) 
 ( -0.000089  0.000000 -0.000017  0.000000  0.000067  0.000000 ) 
 (  0.000062  0.000000 -0.000064  0.000000  0.000006  0.000000 ) 
 (  0.000159  0.000000  0.000097  0.000000 -0.000078  0.000000 ) 
 ( -0.000029  0.000000  0.000101  0.000000  0.000072  0.000000 ) 
 ( -0.000052  0.000000  0.000049  0.000000 -0.000086  0.000000 ) 
 ( -0.000023  0.000000 -0.000002  0.000000 -0.000068  0.000000 ) 
 ( -0.000082  0.000000 -0.000001  0.000000  0.000154  0.000000 ) 
 ( -0.000073  0.000000  0.000019  0.000000 -0.000097  0.000000 ) 
 ( -0.000015  0.000000  0.000015  0.000000 -0.000055  0.000000 ) 
 ( -0.000040  0.000000  0.000068  0.000000  0.000152  0.000000 ) 
 (  0.000146  0.000000 -0.000075  0.000000  0.000000  0.000000 ) 
 (  0.000730  0.000000 -0.000378  0.000000  0.000000  0.000000 ) 
 ( -0.000114  0.000000  0.000059  0.000000 -0.000000  0.000000 ) 
 ( -0.000424  0.000000 -0.000356  0.000000 -0.101509  0.000000 ) 
 ( -0.000871  0.000000  0.000509  0.000000  0.187993  0.000000 ) 
 (  0.000102  0.000000  0.000464  0.000000 -0.086484  0.000000 ) 
 ( -0.001518  0.000000 -0.000889  0.000000 -0.411642  0.000000 ) 
 ( -0.002821  0.000000  0.001630  0.000000  0.762352  0.000000 ) 
 (  0.000011  0.000000  0.001499  0.000000 -0.350710  0.000000 ) 
 (  0.000498  0.000000  0.000083  0.000000  0.115978  0.000000 ) 
 (  0.000764  0.000000 -0.000430  0.000000 -0.214789  0.000000 ) 
 (  0.000187  0.000000 -0.000403  0.000000  0.098811  0.000000 ) 
     freq (  482) =     109.525485 [THz] =    3653.376919 [cm-1]
 (  0.000018  0.000000  0.000001  0.000000 -0.000000  0.000000 ) 
 (  0.000013  0.000000  0.000000  0.000000  0.000000  0.000000 ) 
 (  0.000050  0.000000  0.000001  0.000000  0.000000  0.000000 ) 
 ( -0.000011  0.000000 -0.000009  0.000000  0.000023  0.000000 ) 
 ( -0.000011  0.000000  0.000009  0.000000 -0.000022  0.000000 ) 
 (  0.000005  0.000000 -0.000000  0.000000 -0.000001  0.000000 ) 
 ( -0.000025  0.000000 -0.000011  0.000000  0.000048  0.000000 ) 
 ( -0.000025  0.000000  0.000011  0.000000 -0.000046  0.000000 ) 
 ( -0.000006  0.000000 -0.000001  0.000000 -0.000002  0.000000 ) 
 ( -0.000102  0.000000 -0.000054  0.000000  0.000188  0.000000 ) 
 ( -0.000099  0.000000  0.000051  0.000000 -0.000182  0.000000 ) 
 ( -0.000010  0.000000 -0.000004  0.000000 -0.000006  0.000000 ) 
 ( -0.000020  0.000000  0.000019  0.000000  0.000057  0.000000 ) 
 ( -0.000025  0.000000  0.000002  0.000000  0.000006  0.000000 ) 
 ( -0.000037  0.000000  0.000014  0.000000 -0.000063  0.000000 ) 
 ( -0.000037  0.000000 -0.000015  0.000000  0.000061  0.000000 ) 
 ( -0.000020  0.000000 -0.000021  0.000000 -0.000059  0.000000 ) 
 ( -0.000023  0.000000 -0.000003  0.000000 -0.000002  0.000000 ) 
 ( -0.000042  0.000000  0.000032  0.000000  0.000147  0.000000 ) 
 (  0.000016  0.000000  0.000035  0.000000 -0.000065  0.000000 ) 
 ( -0.000011  0.000000 -0.000017  0.000000 -0.000082  0.000000 ) 
 ( -0.000008  0.000000  0.000016  0.000000  0.000075  0.000000 ) 
 ( -0.000042  0.000000 -0.000031  0.000000 -0.000147  0.000000 ) 
 (  0.000016  0.000000 -0.000037  0.000000  0.000072  0.000000 ) 
 ( -0.000114  0.000000  0.000165  0.000000  0.000281  0.000000 ) 
 (  0.000079  0.000000  0.000165  0.000000 -0.000256  0.000000 ) 
 ( -0.000018  0.000000 -0.000002  0.000000 -0.000025  0.000000 ) 
 ( -0.000005  0.000000  0.000001  0.000000  0.000007  0.000000 ) 
 ( -0.000110  0.000000 -0.000160  0.000000 -0.000273  0.000000 ) 
 (  0.000082  0.000000 -0.000171  0.000000  0.000266  0.000000 ) 
 (  0.000044  0.000000 -0.000045  0.000000  0.000030  0.000000 ) 
 (  0.000008  0.000000 -0.000029  0.000000 -0.000097  0.000000 ) 
 (  0.000039  0.000000 -0.000006  0.000000  0.000067  0.000000 ) 
 (  0.000036  0.000000  0.000007  0.000000 -0.000072  0.000000 ) 
 (  0.000043  0.000000  0.000046  0.000000 -0.000024  0.000000 ) 
 (  0.000007  0.000000  0.000033  0.000000  0.000096  0.000000 ) 
 (  0.000067  0.000000 -0.000061  0.000000  0.000039  0.000000 ) 
 ( -0.000028  0.000000 -0.000073  0.000000 -0.000057  0.000000 ) 
 (  0.000009  0.000000  0.000015  0.000000  0.000018  0.000000 ) 
 (  0.000003  0.000000 -0.000014  0.000000 -0.000021  0.000000 ) 
 (  0.000066  0.000000  0.000058  0.000000 -0.000037  0.000000 ) 
 ( -0.000028  0.000000  0.000077  0.000000  0.000058  0.000000 ) 
 (  0.000246  0.000000 -0.000267  0.000000  0.000191  0.000000 ) 
 ( -0.000118  0.000000 -0.000282  0.000000 -0.000213  0.000000 ) 
 (  0.000051  0.000000  0.000040  0.000000  0.000022  0.000000 ) 
 (  0.000028  0.000000 -0.000036  0.000000 -0.000036  0.000000 ) 
 (  0.000241  0.000000  0.000259  0.000000 -0.000183  0.000000 ) 
 ( -0.000121  0.000000  0.000296  0.000000  0.000219  0.000000 ) 
 ( -0.000028  0.000000  0.000003  0.000000 -0.000003  0.000000 ) 
 (  0.000083  0.000000  0.000063  0.000000  0.000089  0.000000 ) 
 (  0.000080  0.000000 -0.000063  0.000000 -0.000086  0.000000 ) 
 ( -0.000082  0.000000  0.000001  0.000000 -0.000001  0.000000 ) 
 ( -0.000004  0.000000  0.000042  0.000000  0.000018  0.000000 ) 
 ( -0.000007  0.000000 -0.000046  0.000000 -0.000017  0.000000 ) 
 ( -0.000240  0.000000  0.000001  0.000000 -0.000001  0.000000 ) 
 ( -0.000038  0.000000  0.000110  0.000000  0.000043  0.000000 ) 
 ( -0.000045  0.000000 -0.000120  0.000000 -0.000041  0.000000 ) 
 ( -0.000010  0.000000 -0.000000  0.000000  0.000000  0.000000 ) 
 ( -0.000009  0.000000 -0.000000  0.000000 -0.000000  0.000000 ) 
 ( -0.000036  0.000000 -0.000001  0.000000 -0.000000  0.000000 ) 
 (  0.000018  0.000000 -0.000001  0.000000  0.000000  0.000000 ) 
 ( -0.000024  0.000000 -0.000023  0.000000 -0.000012  0.000000 ) 
 ( -0.000022  0.000000  0.000024  0.000000  0.000012  0.000000 ) 
 (  0.000043  0.000000 -0.000000  0.000000  0.000000  0.000000 ) 
 (  0.000005  0.000000 -0.000021  0.000000 -0.000006  0.000000 ) 
 (  0.000006  0.000000  0.000023  0.000000  0.000006  0.000000 ) 
 (  0.000152  0.000000 -0.000000  0.000000  0.000000  0.000000 ) 
 (  0.000029  0.000000 -0.000066  0.000000 -0.000015  0.000000 ) 
 (  0.000033  0.000000  0.000073  0.000000  0.000014  0.000000 ) 
 (  0.000061  0.000000  0.000046  0.000000  0.006115  0.000000 ) 
 (  0.000058  0.000000 -0.000046  0.000000 -0.005910  0.000000 ) 
 ( -0.000020  0.000000  0.000003  0.000000 -0.000206  0.000000 ) 
 (  0.000109  0.000000  0.000077  0.000000  0.010600  0.000000 ) 
 (  0.000104  0.000000 -0.000076  0.000000 -0.010243  0.000000 ) 
 ( -0.000027  0.000000  0.000004  0.000000 -0.000356  0.000000 ) 
 (  0.000428  0.000000  0.000249  0.000000  0.043024  0.000000 ) 
 (  0.000413  0.000000 -0.000241  0.000000 -0.041577  0.000000 ) 
 ( -0.000004  0.000000  0.000017  0.000000 -0.001447  0.000000 ) 
 ( -0.000059  0.000000 -0.000002  0.000000 -0.000002  0.000000 ) 
 ( -0.000064  0.000000 -0.000005  0.000000  0.000060  0.000000 ) 
 ( -0.000064  0.000000  0.000001  0.000000 -0.000058  0.000000 ) 
 ( -0.000082  0.000000  0.000000  0.000000 -0.000000  0.000000 ) 
 ( -0.000016  0.000000  0.000036  0.000000  0.000013  0.000000 ) 
 ( -0.000019  0.000000 -0.000039  0.000000 -0.000013  0.000000 ) 
 ( -0.000302  0.000000  0.000001  0.000000 -0.000001  0.000000 ) 
 ( -0.000046  0.000000  0.000139  0.000000  0.000033  0.000000 ) 
 ( -0.000055  0.000000 -0.000151  0.000000 -0.000032  0.000000 ) 
 ( -0.000050  0.000000  0.000002  0.000000 -0.000080  0.000000 ) 
 ( -0.000050  0.000000 -0.000005  0.000000  0.000078  0.000000 ) 
 ( -0.000056  0.000000 -0.000001  0.000000  0.000003  0.000000 ) 
 ( -0.000059  0.000000 -0.000030  0.000000 -0.000123  0.000000 ) 
 ( -0.000057  0.000000  0.000028  0.000000  0.000119  0.000000 ) 
 ( -0.000008  0.000000 -0.000002  0.000000  0.000004  0.000000 ) 
 ( -0.000245  0.000000 -0.000112  0.000000 -0.000512  0.000000 ) 
 ( -0.000239  0.000000  0.000105  0.000000  0.000495  0.000000 ) 
 ( -0.000054  0.000000 -0.000009  0.000000  0.000017  0.000000 ) 
 (  0.000005  0.000000  0.000007  0.000000 -0.000045  0.000000 ) 
 (  0.000031  0.000000  0.000018  0.000000  0.000061  0.000000 ) 
 (  0.000027  0.000000 -0.000011  0.000000 -0.000016  0.000000 ) 
 (  0.000028  0.000000  0.000011  0.000000  0.000020  0.000000 ) 
 (  0.000005  0.000000 -0.000005  0.000000  0.000042  0.000000 ) 
 (  0.000031  0.000000 -0.000017  0.000000 -0.000062  0.000000 ) 
 (  0.000007  0.000000  0.000006  0.000000 -0.000076  0.000000 ) 
 (  0.000027  0.000000 -0.000003  0.000000  0.000083  0.000000 ) 
 (  0.000009  0.000000 -0.000016  0.000000 -0.000007  0.000000 ) 
 (  0.000009  0.000000  0.000017  0.000000  0.000012  0.000000 ) 
 (  0.000006  0.000000 -0.000005  0.000000  0.000073  0.000000 ) 
 (  0.000027  0.000000  0.000003  0.000000 -0.000085  0.000000 ) 
 (  0.000060  0.000000  0.000077  0.000000 -0.000307  0.000000 ) 
 (  0.000104  0.000000 -0.000021  0.000000  0.000323  0.000000 ) 
 ( -0.000003  0.000000 -0.000010  0.000000 -0.000016  0.000000 ) 
 ( -0.000000  0.000000  0.000017  0.000000  0.000037  0.000000 ) 
 (  0.000057  0.000000 -0.000074  0.000000  0.000295  0.000000 ) 
 (  0.000107  0.000000  0.000022  0.000000 -0.000332  0.000000 ) 
 ( -0.000001  0.000000  0.000028  0.000000  0.000003  0.000000 ) 
 (  0.000001  0.000000 -0.000143  0.000000  0.000104  0.000000 ) 
 ( -0.000148  0.000000 -0.000060  0.000000 -0.000107  0.000000 ) 
 ( -0.000151  0.000000  0.000063  0.000000  0.000110  0.000000 ) 
 ( -0.000010  0.000000 -0.000033  0.000000 -0.000010  0.000000 ) 
 (  0.000003  0.000000  0.000137  0.000000 -0.000100  0.000000 ) 
 ( -0.000010  0.000000  0.000032  0.000000  0.000025  0.000000 ) 
 (  0.000034  0.000000  0.000003  0.000000  0.000021  0.000000 ) 
 ( -0.000013  0.000000 -0.000020  0.000000 -0.000046  0.000000 ) 
 ( -0.000011  0.000000  0.000021  0.000000  0.000045  0.000000 ) 
 ( -0.000011  0.000000 -0.000031  0.000000 -0.000027  0.000000 ) 
 (  0.000034  0.000000 -0.000005  0.000000 -0.000018  0.000000 ) 
 ( -0.000042  0.000000  0.000174  0.000000 -0.000036  0.000000 ) 
 (  0.000137  0.000000  0.000069  0.000000  0.000061  0.000000 ) 
 ( -0.000044  0.000000 -0.000033  0.000000 -0.000025  0.000000 ) 
 ( -0.000034  0.000000  0.000038  0.000000  0.000028  0.000000 ) 
 ( -0.000044  0.000000 -0.000170  0.000000  0.000033  0.000000 ) 
 (  0.000141  0.000000 -0.000075  0.000000 -0.000061  0.000000 ) 
 (  0.000029  0.000000 -0.000013  0.000000  0.000007  0.000000 ) 
 ( -0.000041  0.000000 -0.000098  0.000000 -0.000150  0.000000 ) 
 ( -0.000080  0.000000  0.000005  0.000000  0.000142  0.000000 ) 
 ( -0.000084  0.000000 -0.000004  0.000000 -0.000148  0.000000 ) 
 (  0.000025  0.000000  0.000007  0.000000  0.000003  0.000000 ) 
 ( -0.000039  0.000000  0.000097  0.000000  0.000145  0.000000 ) 
 (  0.000079  0.000000 -0.000007  0.000000  0.000000  0.000000 ) 
 ( -0.000004  0.000000 -0.000053  0.000000 -0.000032  0.000000 ) 
 ( -0.000002  0.000000  0.000042  0.000000  0.000032  0.000000 ) 
 ( -0.000005  0.000000 -0.000039  0.000000 -0.000033  0.000000 ) 
 (  0.000078  0.000000  0.000006  0.000000  0.000002  0.000000 ) 
 ( -0.000002  0.000000  0.000056  0.000000  0.000031  0.000000 ) 
 (  0.000167  0.000000 -0.000068  0.000000  0.000047  0.000000 ) 
 ( -0.000021  0.000000 -0.000164  0.000000 -0.000089  0.000000 ) 
 ( -0.000010  0.000000  0.000046  0.000000  0.000042  0.000000 ) 
 ( -0.000020  0.000000 -0.000040  0.000000 -0.000046  0.000000 ) 
 (  0.000163  0.000000  0.000064  0.000000 -0.000043  0.000000 ) 
 ( -0.000019  0.000000  0.000170  0.000000  0.000089  0.000000 ) 
 (  0.000214  0.000000  0.000006  0.000000 -0.000000  0.000000 ) 
 (  0.000209  0.000000  0.000006  0.000000  0.000000  0.000000 ) 
 (  0.000842  0.000000  0.000025  0.000000  0.000000  0.000000 ) 
 ( -0.000392  0.000000 -0.000328  0.000000 -0.098062  0.000000 ) 
 ( -0.000372  0.000000  0.000328  0.000000  0.094765  0.000000 ) 
 (  0.000187  0.000000 -0.000017  0.000000  0.003298  0.000000 ) 
 ( -0.000706  0.000000 -0.000532  0.000000 -0.170246  0.000000 ) 
 ( -0.000675  0.000000  0.000527  0.000000  0.164521  0.000000 ) 
 (  0.000227  0.000000 -0.000030  0.000000  0.005725  0.000000 ) 
 ( -0.002626  0.000000 -0.001536  0.000000 -0.690059  0.000000 ) 
 ( -0.002536  0.000000  0.001486  0.000000  0.666853  0.000000 ) 
 (  0.000037  0.000000 -0.000102  0.000000  0.023206  0.000000 ) 
     freq (  483) =     109.525485 [THz] =    3653.376919 [cm-1]
 ( -0.000001  0.000000  0.000018  0.000000 -0.000000  0.000000 ) 
 ( -0.000000  0.000000  0.000013  0.000000 -0.000000  0.000000 ) 
 ( -0.000001  0.000000  0.000050  0.000000  0.000000  0.000000 ) 
 ( -0.000009  0.000000 -0.000000  0.000000  0.000012  0.000000 ) 
 (  0.000010  0.000000 -0.000001  0.000000  0.000014  0.000000 ) 
 ( -0.000000  0.000000 -0.000017  0.000000 -0.000026  0.000000 ) 
 ( -0.000010  0.000000 -0.000012  0.000000  0.000026  0.000000 ) 
 (  0.000012  0.000000 -0.000013  0.000000  0.000029  0.000000 ) 
 (  0.000000  0.000000 -0.000031  0.000000 -0.000054  0.000000 ) 
 ( -0.000049  0.000000 -0.000038  0.000000  0.000101  0.000000 ) 
 (  0.000055  0.000000 -0.000041  0.000000  0.000112  0.000000 ) 
 (  0.000000  0.000000 -0.000130  0.000000 -0.000214  0.000000 ) 
 ( -0.000004  0.000000 -0.000035  0.000000 -0.000040  0.000000 ) 
 ( -0.000022  0.000000 -0.000030  0.000000  0.000070  0.000000 ) 
 ( -0.000009  0.000000 -0.000017  0.000000 -0.000029  0.000000 ) 
 (  0.000011  0.000000 -0.000016  0.000000 -0.000033  0.000000 ) 
 (  0.000006  0.000000 -0.000034  0.000000 -0.000037  0.000000 ) 
 (  0.000023  0.000000 -0.000030  0.000000  0.000070  0.000000 ) 
 ( -0.000001  0.000000  0.000018  0.000000 -0.000010  0.000000 ) 
 (  0.000002  0.000000 -0.000041  0.000000  0.000132  0.000000 ) 
 ( -0.000050  0.000000 -0.000014  0.000000 -0.000122  0.000000 ) 
 (  0.000051  0.000000 -0.000015  0.000000 -0.000127  0.000000 ) 
 (  0.000003  0.000000  0.000020  0.000000 -0.000001  0.000000 ) 
 ( -0.000003  0.000000 -0.000039  0.000000  0.000128  0.000000 ) 
 ( -0.000054  0.000000  0.000078  0.000000  0.000133  0.000000 ) 
 ( -0.000054  0.000000 -0.000114  0.000000  0.000177  0.000000 ) 
 ( -0.000220  0.000000 -0.000018  0.000000 -0.000310  0.000000 ) 
 (  0.000221  0.000000 -0.000018  0.000000 -0.000311  0.000000 ) 
 (  0.000060  0.000000  0.000088  0.000000  0.000150  0.000000 ) 
 (  0.000049  0.000000 -0.000104  0.000000  0.000161  0.000000 ) 
 (  0.000009  0.000000  0.000017  0.000000  0.000095  0.000000 ) 
 (  0.000024  0.000000  0.000053  0.000000 -0.000022  0.000000 ) 
 (  0.000048  0.000000  0.000022  0.000000 -0.000073  0.000000 ) 
 ( -0.000050  0.000000  0.000021  0.000000 -0.000069  0.000000 ) 
 ( -0.000011  0.000000  0.000014  0.000000  0.000097  0.000000 ) 
 ( -0.000024  0.000000  0.000051  0.000000 -0.000027  0.000000 ) 
 (  0.000018  0.000000 -0.000035  0.000000  0.000043  0.000000 ) 
 (  0.000006  0.000000  0.000060  0.000000  0.000012  0.000000 ) 
 (  0.000094  0.000000  0.000023  0.000000 -0.000056  0.000000 ) 
 ( -0.000095  0.000000  0.000024  0.000000 -0.000055  0.000000 ) 
 ( -0.000022  0.000000 -0.000039  0.000000  0.000046  0.000000 ) 
 ( -0.000004  0.000000  0.000055  0.000000  0.000009  0.000000 ) 
 (  0.000073  0.000000 -0.000127  0.000000  0.000136  0.000000 ) 
 (  0.000057  0.000000  0.000237  0.000000  0.000098  0.000000 ) 
 (  0.000379  0.000000  0.000069  0.000000 -0.000234  0.000000 ) 
 ( -0.000382  0.000000  0.000071  0.000000 -0.000232  0.000000 ) 
 ( -0.000087  0.000000 -0.000142  0.000000  0.000147  0.000000 ) 
 ( -0.000050  0.000000  0.000219  0.000000  0.000085  0.000000 ) 
 (  0.000001  0.000000  0.000118  0.000000 -0.000102  0.000000 ) 
 (  0.000061  0.000000  0.000007  0.000000  0.000048  0.000000 ) 
 ( -0.000065  0.000000  0.000011  0.000000  0.000053  0.000000 ) 
 (  0.000002  0.000000  0.000020  0.000000 -0.000020  0.000000 ) 
 (  0.000044  0.000000 -0.000058  0.000000  0.000010  0.000000 ) 
 ( -0.000044  0.000000 -0.000055  0.000000  0.000011  0.000000 ) 
 (  0.000007  0.000000  0.000025  0.000000 -0.000049  0.000000 ) 
 (  0.000116  0.000000 -0.000177  0.000000  0.000023  0.000000 ) 
 ( -0.000113  0.000000 -0.000171  0.000000  0.000026  0.000000 ) 
 (  0.000000  0.000000 -0.000010  0.000000  0.000000  0.000000 ) 
 (  0.000000  0.000000 -0.000009  0.000000 -0.000000  0.000000 ) 
 (  0.000001  0.000000 -0.000036  0.000000 -0.000000  0.000000 ) 
 ( -0.000001  0.000000 -0.000036  0.000000  0.000014  0.000000 ) 
 ( -0.000023  0.000000  0.000005  0.000000 -0.000007  0.000000 ) 
 (  0.000024  0.000000  0.000004  0.000000 -0.000007  0.000000 ) 
 ( -0.000001  0.000000 -0.000007  0.000000  0.000007  0.000000 ) 
 ( -0.000022  0.000000  0.000031  0.000000 -0.000003  0.000000 ) 
 (  0.000022  0.000000  0.000030  0.000000 -0.000004  0.000000 ) 
 ( -0.000004  0.000000 -0.000009  0.000000  0.000016  0.000000 ) 
 ( -0.000070  0.000000  0.000114  0.000000 -0.000008  0.000000 ) 
 (  0.000069  0.000000  0.000109  0.000000 -0.000009  0.000000 ) 
 (  0.000044  0.000000  0.000005  0.000000  0.003293  0.000000 ) 
 ( -0.000048  0.000000  0.000008  0.000000  0.003649  0.000000 ) 
 (  0.000001  0.000000  0.000086  0.000000 -0.006943  0.000000 ) 
 (  0.000074  0.000000  0.000016  0.000000  0.005708  0.000000 ) 
 ( -0.000080  0.000000  0.000020  0.000000  0.006326  0.000000 ) 
 (  0.000001  0.000000  0.000151  0.000000 -0.012034  0.000000 ) 
 (  0.000232  0.000000  0.000130  0.000000  0.023169  0.000000 ) 
 ( -0.000257  0.000000  0.000145  0.000000  0.025675  0.000000 ) 
 (  0.000000  0.000000  0.000562  0.000000 -0.048844  0.000000 ) 
 (  0.000002  0.000000 -0.000065  0.000000 -0.000068  0.000000 ) 
 ( -0.000001  0.000000 -0.000060  0.000000  0.000032  0.000000 ) 
 (  0.000005  0.000000 -0.000060  0.000000  0.000036  0.000000 ) 
 (  0.000002  0.000000  0.000004  0.000000 -0.000015  0.000000 ) 
 (  0.000038  0.000000 -0.000062  0.000000  0.000007  0.000000 ) 
 ( -0.000037  0.000000 -0.000060  0.000000  0.000008  0.000000 ) 
 (  0.000009  0.000000  0.000033  0.000000 -0.000038  0.000000 ) 
 (  0.000146  0.000000 -0.000222  0.000000  0.000018  0.000000 ) 
 ( -0.000143  0.000000 -0.000214  0.000000  0.000020  0.000000 ) 
 (  0.000005  0.000000 -0.000054  0.000000 -0.000043  0.000000 ) 
 ( -0.000002  0.000000 -0.000054  0.000000 -0.000048  0.000000 ) 
 (  0.000002  0.000000 -0.000048  0.000000  0.000091  0.000000 ) 
 ( -0.000027  0.000000 -0.000023  0.000000 -0.000066  0.000000 ) 
 (  0.000031  0.000000 -0.000025  0.000000 -0.000073  0.000000 ) 
 (  0.000000  0.000000 -0.000074  0.000000  0.000139  0.000000 ) 
 ( -0.000101  0.000000 -0.000113  0.000000 -0.000276  0.000000 ) 
 (  0.000116  0.000000 -0.000120  0.000000 -0.000305  0.000000 ) 
 (  0.000002  0.000000 -0.000305  0.000000  0.000581  0.000000 ) 
 ( -0.000002  0.000000  0.000038  0.000000 -0.000045  0.000000 ) 
 (  0.000008  0.000000  0.000011  0.000000 -0.000017  0.000000 ) 
 ( -0.000020  0.000000  0.000015  0.000000  0.000061  0.000000 ) 
 (  0.000019  0.000000  0.000014  0.000000  0.000060  0.000000 ) 
 (  0.000002  0.000000  0.000038  0.000000 -0.000047  0.000000 ) 
 ( -0.000010  0.000000  0.000012  0.000000 -0.000013  0.000000 ) 
 (  0.000015  0.000000  0.000022  0.000000 -0.000052  0.000000 ) 
 (  0.000006  0.000000  0.000002  0.000000 -0.000040  0.000000 ) 
 ( -0.000007  0.000000  0.000020  0.000000  0.000092  0.000000 ) 
 (  0.000007  0.000000  0.000019  0.000000  0.000091  0.000000 ) 
 ( -0.000015  0.000000  0.000022  0.000000 -0.000056  0.000000 ) 
 ( -0.000007  0.000000  0.000001  0.000000 -0.000035  0.000000 ) 
 (  0.000046  0.000000  0.000047  0.000000 -0.000196  0.000000 ) 
 ( -0.000051  0.000000  0.000004  0.000000 -0.000168  0.000000 ) 
 ( -0.000040  0.000000  0.000110  0.000000  0.000364  0.000000 ) 
 (  0.000040  0.000000  0.000109  0.000000  0.000362  0.000000 ) 
 ( -0.000050  0.000000  0.000052  0.000000 -0.000214  0.000000 ) 
 (  0.000045  0.000000  0.000002  0.000000 -0.000149  0.000000 ) 
 (  0.000144  0.000000 -0.000097  0.000000 -0.000122  0.000000 ) 
 ( -0.000026  0.000000 -0.000100  0.000000  0.000063  0.000000 ) 
 (  0.000057  0.000000  0.000049  0.000000  0.000059  0.000000 ) 
 ( -0.000048  0.000000  0.000046  0.000000  0.000052  0.000000 ) 
 ( -0.000144  0.000000 -0.000095  0.000000 -0.000121  0.000000 ) 
 (  0.000026  0.000000 -0.000108  0.000000  0.000069  0.000000 ) 
 (  0.000022  0.000000  0.000018  0.000000 -0.000038  0.000000 ) 
 ( -0.000007  0.000000 -0.000026  0.000000  0.000041  0.000000 ) 
 ( -0.000030  0.000000  0.000020  0.000000 -0.000002  0.000000 ) 
 (  0.000031  0.000000  0.000019  0.000000 -0.000005  0.000000 ) 
 ( -0.000021  0.000000  0.000019  0.000000 -0.000037  0.000000 ) 
 (  0.000005  0.000000 -0.000026  0.000000  0.000042  0.000000 ) 
 (  0.000034  0.000000  0.000076  0.000000 -0.000050  0.000000 ) 
 ( -0.000071  0.000000 -0.000103  0.000000 -0.000006  0.000000 ) 
 ( -0.000174  0.000000  0.000077  0.000000  0.000056  0.000000 ) 
 (  0.000176  0.000000  0.000075  0.000000  0.000054  0.000000 ) 
 ( -0.000031  0.000000  0.000086  0.000000 -0.000052  0.000000 ) 
 (  0.000063  0.000000 -0.000099  0.000000 -0.000002  0.000000 ) 
 (  0.000058  0.000000 -0.000090  0.000000  0.000169  0.000000 ) 
 ( -0.000027  0.000000 -0.000021  0.000000 -0.000078  0.000000 ) 
 (  0.000076  0.000000  0.000019  0.000000 -0.000090  0.000000 ) 
 ( -0.000071  0.000000  0.000019  0.000000 -0.000082  0.000000 ) 
 ( -0.000060  0.000000 -0.000091  0.000000  0.000169  0.000000 ) 
 (  0.000030  0.000000 -0.000026  0.000000 -0.000087  0.000000 ) 
 (  0.000004  0.000000 -0.000030  0.000000  0.000037  0.000000 ) 
 ( -0.000041  0.000000  0.000053  0.000000 -0.000019  0.000000 ) 
 (  0.000054  0.000000  0.000050  0.000000 -0.000019  0.000000 ) 
 ( -0.000054  0.000000  0.000053  0.000000 -0.000017  0.000000 ) 
 ( -0.000009  0.000000 -0.000031  0.000000  0.000037  0.000000 ) 
 (  0.000041  0.000000  0.000050  0.000000 -0.000020  0.000000 ) 
 (  0.000056  0.000000 -0.000076  0.000000  0.000075  0.000000 ) 
 ( -0.000040  0.000000  0.000111  0.000000  0.000003  0.000000 ) 
 (  0.000170  0.000000  0.000100  0.000000 -0.000079  0.000000 ) 
 ( -0.000169  0.000000  0.000103  0.000000 -0.000076  0.000000 ) 
 ( -0.000066  0.000000 -0.000080  0.000000  0.000078  0.000000 ) 
 (  0.000041  0.000000  0.000101  0.000000 -0.000002  0.000000 ) 
 ( -0.000006  0.000000  0.000214  0.000000 -0.000000  0.000000 ) 
 ( -0.000006  0.000000  0.000209  0.000000  0.000000  0.000000 ) 
 ( -0.000025  0.000000  0.000842  0.000000  0.000000  0.000000 ) 
 ( -0.000317  0.000000  0.000007  0.000000 -0.052808  0.000000 ) 
 (  0.000340  0.000000 -0.000013  0.000000 -0.058520  0.000000 ) 
 ( -0.000006  0.000000 -0.000572  0.000000  0.111329  0.000000 ) 
 ( -0.000509  0.000000 -0.000063  0.000000 -0.091681  0.000000 ) 
 (  0.000550  0.000000 -0.000095  0.000000 -0.101597  0.000000 ) 
 ( -0.000007  0.000000 -0.000996  0.000000  0.193278  0.000000 ) 
 ( -0.001435  0.000000 -0.000791  0.000000 -0.371610  0.000000 ) 
 (  0.001588  0.000000 -0.000881  0.000000 -0.411804  0.000000 ) 
 ( -0.000001  0.000000 -0.003453  0.000000  0.783413  0.000000 ) 
     freq (  484) =     115.608659 [THz] =    3856.289762 [cm-1]
 (  0.000000  0.000000  0.000000  0.000000  0.000000  0.000000 ) 
 ( -0.000000  0.000000  0.000000  0.000000  0.000394  0.000000 ) 
 (  0.000000  0.000000 -0.000000  0.000000 -0.000012  0.000000 ) 
 ( -0.000001  0.000000 -0.000001  0.000000  0.000002  0.000000 ) 
 (  0.000001  0.000000 -0.000001  0.000000  0.000002  0.000000 ) 
 ( -0.000000  0.000000  0.000001  0.000000  0.000002  0.000000 ) 
 (  0.000176  0.000000  0.000101  0.000000  0.000140  0.000000 ) 
 ( -0.000176  0.000000  0.000101  0.000000  0.000140  0.000000 ) 
 ( -0.000000  0.000000 -0.000203  0.000000  0.000140  0.000000 ) 
 ( -0.000007  0.000000 -0.000004  0.000000 -0.000007  0.000000 ) 
 (  0.000007  0.000000 -0.000004  0.000000 -0.000007  0.000000 ) 
 (  0.000000  0.000000  0.000008  0.000000 -0.000007  0.000000 ) 
 ( -0.000005  0.000000  0.000001  0.000000  0.000005  0.000000 ) 
 (  0.000002  0.000000 -0.000004  0.000000  0.000005  0.000000 ) 
 (  0.000003  0.000000  0.000004  0.000000  0.000005  0.000000 ) 
 ( -0.000003  0.000000  0.000004  0.000000  0.000005  0.000000 ) 
 (  0.000005  0.000000  0.000001  0.000000  0.000005  0.000000 ) 
 ( -0.000002  0.000000 -0.000004  0.000000  0.000005  0.000000 ) 
 ( -0.000008  0.000000 -0.000014  0.000000  0.000017  0.000000 ) 
 (  0.000016  0.000000  0.000000  0.000000  0.000017  0.000000 ) 
 ( -0.000008  0.000000  0.000014  0.000000  0.000017  0.000000 ) 
 (  0.000008  0.000000  0.000014  0.000000  0.000017  0.000000 ) 
 (  0.000008  0.000000 -0.000014  0.000000  0.000017  0.000000 ) 
 ( -0.000016  0.000000  0.000000  0.000000  0.000017  0.000000 ) 
 ( -0.000002  0.000000 -0.000001  0.000000 -0.000007  0.000000 ) 
 (  0.000001  0.000000 -0.000001  0.000000 -0.000007  0.000000 ) 
 (  0.000000  0.000000  0.000002  0.000000 -0.000007  0.000000 ) 
 ( -0.000000  0.000000  0.000002  0.000000 -0.000007  0.000000 ) 
 (  0.000002  0.000000 -0.000001  0.000000 -0.000007  0.000000 ) 
 ( -0.000001  0.000000 -0.000001  0.000000 -0.000007  0.000000 ) 
 (  0.000001  0.000000  0.000002  0.000000  0.000002  0.000000 ) 
 ( -0.000002  0.000000 -0.000000  0.000000  0.000002  0.000000 ) 
 (  0.000001  0.000000 -0.000002  0.000000  0.000002  0.000000 ) 
 ( -0.000001  0.000000 -0.000002  0.000000  0.000002  0.000000 ) 
 ( -0.000001  0.000000  0.000002  0.000000  0.000002  0.000000 ) 
 (  0.000002  0.000000 -0.000000  0.000000  0.000002  0.000000 ) 
 (  0.000012  0.000000  0.000013  0.000000 -0.000105  0.000000 ) 
 ( -0.000017  0.000000  0.000004  0.000000 -0.000105  0.000000 ) 
 (  0.000005  0.000000 -0.000016  0.000000 -0.000105  0.000000 ) 
 ( -0.000005  0.000000 -0.000016  0.000000 -0.000105  0.000000 ) 
 ( -0.000012  0.000000  0.000013  0.000000 -0.000105  0.000000 ) 
 (  0.000017  0.000000  0.000004  0.000000 -0.000105  0.000000 ) 
 ( -0.000001  0.000000 -0.000001  0.000000  0.000005  0.000000 ) 
 (  0.000001  0.000000 -0.000000  0.000000  0.000005  0.000000 ) 
 ( -0.000000  0.000000  0.000001  0.000000  0.000005  0.000000 ) 
 (  0.000000  0.000000  0.000001  0.000000  0.000005  0.000000 ) 
 (  0.000001  0.000000 -0.000001  0.000000  0.000005  0.000000 ) 
 ( -0.000001  0.000000 -0.000000  0.000000  0.000005  0.000000 ) 
 (  0.000000  0.000000 -0.000002  0.000000 -0.000000  0.000000 ) 
 (  0.000001  0.000000  0.000001  0.000000 -0.000000  0.000000 ) 
 ( -0.000001  0.000000  0.000001  0.000000 -0.000000  0.000000 ) 
 ( -0.000000  0.000000  0.000120  0.000000  0.000037  0.000000 ) 
 ( -0.000104  0.000000 -0.000060  0.000000  0.000037  0.000000 ) 
 (  0.000104  0.000000 -0.000060  0.000000  0.000037  0.000000 ) 
 ( -0.000000  0.000000  0.000001  0.000000 -0.000003  0.000000 ) 
 ( -0.000001  0.000000 -0.000001  0.000000 -0.000003  0.000000 ) 
 (  0.000001  0.000000 -0.000001  0.000000 -0.000003  0.000000 ) 
 ( -0.000000  0.000000  0.000000  0.000000  0.000074  0.000000 ) 
 (  0.000000  0.000000 -0.000000  0.000000  0.062010  0.000000 ) 
 (  0.000000  0.000000  0.000000  0.000000 -0.002097  0.000000 ) 
 (  0.000000  0.000000 -0.000001  0.000000  0.000001  0.000000 ) 
 (  0.000001  0.000000  0.000000  0.000000  0.000001  0.000000 ) 
 ( -0.000001  0.000000  0.000000  0.000000  0.000001  0.000000 ) 
 (  0.000000  0.000000 -0.000079  0.000000 -0.000094  0.000000 ) 
 (  0.000068  0.000000  0.000039  0.000000 -0.000094  0.000000 ) 
 ( -0.000068  0.000000  0.000039  0.000000 -0.000094  0.000000 ) 
 ( -0.000000  0.000000 -0.000000  0.000000  0.000005  0.000000 ) 
 (  0.000000  0.000000  0.000000  0.000000  0.000005  0.000000 ) 
 ( -0.000000  0.000000  0.000000  0.000000  0.000005  0.000000 ) 
 (  0.000006  0.000000  0.000003  0.000000  0.000015  0.000000 ) 
 ( -0.000006  0.000000  0.000003  0.000000  0.000015  0.000000 ) 
 (  0.000000  0.000000 -0.000007  0.000000  0.000015  0.000000 ) 
 (  0.000002  0.000000  0.000001  0.000000 -0.000069  0.000000 ) 
 ( -0.000002  0.000000  0.000001  0.000000 -0.000069  0.000000 ) 
 (  0.000000  0.000000 -0.000002  0.000000 -0.000069  0.000000 ) 
 (  0.000001  0.000000  0.000000  0.000000  0.000001  0.000000 ) 
 ( -0.000001  0.000000  0.000000  0.000000  0.000001  0.000000 ) 
 (  0.000000  0.000000 -0.000001  0.000000  0.000001  0.000000 ) 
 ( -0.000000  0.000000 -0.000003  0.000000 -0.000002  0.000000 ) 
 (  0.000002  0.000000  0.000001  0.000000 -0.000002  0.000000 ) 
 ( -0.000002  0.000000  0.000001  0.000000 -0.000002  0.000000 ) 
 ( -0.000000  0.000000 -0.000021  0.000000  0.000108  0.000000 ) 
 (  0.000019  0.000000  0.000011  0.000000  0.000108  0.000000 ) 
 ( -0.000019  0.000000  0.000011  0.000000  0.000108  0.000000 ) 
 ( -0.000000  0.000000  0.000003  0.000000 -0.000005  0.000000 ) 
 ( -0.000002  0.000000 -0.000001  0.000000 -0.000005  0.000000 ) 
 (  0.000002  0.000000 -0.000001  0.000000 -0.000005  0.000000 ) 
 (  0.000000  0.000000  0.000000  0.000000 -0.000001  0.000000 ) 
 ( -0.000000  0.000000  0.000000  0.000000 -0.000001  0.000000 ) 
 (  0.000000  0.000000 -0.000000  0.000000 -0.000001  0.000000 ) 
 ( -0.000035  0.000000 -0.000020  0.000000  0.000089  0.000000 ) 
 (  0.000035  0.000000 -0.000020  0.000000  0.000089  0.000000 ) 
 ( -0.000000  0.000000  0.000040  0.000000  0.000089  0.000000 ) 
 (  0.000002  0.000000  0.000001  0.000000 -0.000003  0.000000 ) 
 ( -0.000002  0.000000  0.000001  0.000000 -0.000003  0.000000 ) 
 (  0.000000  0.000000 -0.000002  0.000000 -0.000003  0.000000 ) 
 (  0.000003  0.000000 -0.000001  0.000000 -0.000003  0.000000 ) 
 ( -0.000001  0.000000  0.000003  0.000000 -0.000003  0.000000 ) 
 ( -0.000002  0.000000 -0.000002  0.000000 -0.000003  0.000000 ) 
 (  0.000002  0.000000 -0.000002  0.000000 -0.000003  0.000000 ) 
 ( -0.000003  0.000000 -0.000001  0.000000 -0.000003  0.000000 ) 
 (  0.000001  0.000000  0.000003  0.000000 -0.000003  0.000000 ) 
 (  0.000046  0.000000  0.000076  0.000000  0.000026  0.000000 ) 
 ( -0.000089  0.000000  0.000002  0.000000  0.000026  0.000000 ) 
 (  0.000043  0.000000 -0.000078  0.000000  0.000026  0.000000 ) 
 ( -0.000043  0.000000 -0.000078  0.000000  0.000026  0.000000 ) 
 ( -0.000046  0.000000  0.000076  0.000000  0.000026  0.000000 ) 
 (  0.000089  0.000000  0.000002  0.000000  0.000026  0.000000 ) 
 ( -0.000002  0.000000  0.000001  0.000000  0.000000  0.000000 ) 
 (  0.000000  0.000000 -0.000002  0.000000  0.000000  0.000000 ) 
 (  0.000002  0.000000  0.000001  0.000000  0.000000  0.000000 ) 
 ( -0.000002  0.000000  0.000001  0.000000  0.000000  0.000000 ) 
 (  0.000002  0.000000  0.000001  0.000000  0.000000  0.000000 ) 
 ( -0.000000  0.000000 -0.000002  0.000000  0.000000  0.000000 ) 
 ( -0.000007  0.000000 -0.000008  0.000000 -0.000002  0.000000 ) 
 (  0.000010  0.000000 -0.000002  0.000000 -0.000002  0.000000 ) 
 ( -0.000003  0.000000  0.000010  0.000000 -0.000002  0.000000 ) 
 (  0.000003  0.000000  0.000010  0.000000 -0.000002  0.000000 ) 
 (  0.000007  0.000000 -0.000008  0.000000 -0.000002  0.000000 ) 
 ( -0.000010  0.000000 -0.000002  0.000000 -0.000002  0.000000 ) 
 ( -0.000012  0.000000 -0.000017  0.000000  0.000015  0.000000 ) 
 (  0.000021  0.000000 -0.000002  0.000000  0.000015  0.000000 ) 
 ( -0.000009  0.000000  0.000019  0.000000  0.000015  0.000000 ) 
 (  0.000009  0.000000  0.000019  0.000000  0.000015  0.000000 ) 
 (  0.000012  0.000000 -0.000017  0.000000  0.000015  0.000000 ) 
 ( -0.000021  0.000000 -0.000002  0.000000  0.000015  0.000000 ) 
 (  0.000002  0.000000  0.000005  0.000000 -0.000003  0.000000 ) 
 ( -0.000006  0.000000 -0.000001  0.000000 -0.000003  0.000000 ) 
 (  0.000003  0.000000 -0.000005  0.000000 -0.000003  0.000000 ) 
 ( -0.000003  0.000000 -0.000005  0.000000 -0.000003  0.000000 ) 
 ( -0.000002  0.000000  0.000005  0.000000 -0.000003  0.000000 ) 
 (  0.000006  0.000000 -0.000001  0.000000 -0.000003  0.000000 ) 
 (  0.000003  0.000000 -0.000001  0.000000  0.000002  0.000000 ) 
 ( -0.000001  0.000000  0.000004  0.000000  0.000002  0.000000 ) 
 ( -0.000003  0.000000 -0.000002  0.000000  0.000002  0.000000 ) 
 (  0.000003  0.000000 -0.000002  0.000000  0.000002  0.000000 ) 
 ( -0.000003  0.000000 -0.000001  0.000000  0.000002  0.000000 ) 
 (  0.000001  0.000000  0.000004  0.000000  0.000002  0.000000 ) 
 ( -0.000015  0.000000 -0.000012  0.000000 -0.000008  0.000000 ) 
 (  0.000018  0.000000 -0.000008  0.000000 -0.000008  0.000000 ) 
 ( -0.000002  0.000000  0.000019  0.000000 -0.000008  0.000000 ) 
 (  0.000002  0.000000  0.000019  0.000000 -0.000008  0.000000 ) 
 (  0.000015  0.000000 -0.000012  0.000000 -0.000008  0.000000 ) 
 ( -0.000018  0.000000 -0.000008  0.000000 -0.000008  0.000000 ) 
 ( -0.000002  0.000000 -0.000007  0.000000  0.000002  0.000000 ) 
 (  0.000007  0.000000  0.000001  0.000000  0.000002  0.000000 ) 
 ( -0.000005  0.000000  0.000005  0.000000  0.000002  0.000000 ) 
 (  0.000005  0.000000  0.000005  0.000000  0.000002  0.000000 ) 
 (  0.000002  0.000000 -0.000007  0.000000  0.000002  0.000000 ) 
 ( -0.000007  0.000000  0.000001  0.000000  0.000002  0.000000 ) 
 (  0.000000  0.000000 -0.000000  0.000000 -0.001216  0.000000 ) 
 (  0.000000  0.000000 -0.000000  0.000000 -0.997500  0.000000 ) 
 ( -0.000000  0.000000 -0.000000  0.000000  0.033744  0.000000 ) 
 ( -0.000037  0.000000 -0.000022  0.000000 -0.000307  0.000000 ) 
 (  0.000037  0.000000 -0.000022  0.000000 -0.000307  0.000000 ) 
 (  0.000000  0.000000  0.000043  0.000000 -0.000307  0.000000 ) 
 (  0.000091  0.000000  0.000053  0.000000  0.000959  0.000000 ) 
 ( -0.000091  0.000000  0.000053  0.000000  0.000959  0.000000 ) 
 (  0.000000  0.000000 -0.000105  0.000000  0.000959  0.000000 ) 
 ( -0.000003  0.000000 -0.000002  0.000000  0.000009  0.000000 ) 
 (  0.000003  0.000000 -0.000002  0.000000  0.000009  0.000000 ) 
 ( -0.000000  0.000000  0.000003  0.000000  0.000009  0.000000 ) 
     freq (  485) =     115.609069 [THz] =    3856.303434 [cm-1]
 (  0.000000  0.000000 -0.000000  0.000000 -0.000002  0.000000 ) 
 ( -0.000000  0.000000  0.000000  0.000000  0.000013  0.000000 ) 
 (  0.000000  0.000000 -0.000000  0.000000  0.000394  0.000000 ) 
 ( -0.000003  0.000000 -0.000002  0.000000 -0.000003  0.000000 ) 
 (  0.000003  0.000000 -0.000002  0.000000 -0.000003  0.000000 ) 
 ( -0.000000  0.000000  0.000003  0.000000 -0.000003  0.000000 ) 
 (  0.000005  0.000000  0.000003  0.000000  0.000006  0.000000 ) 
 ( -0.000005  0.000000  0.000003  0.000000  0.000006  0.000000 ) 
 ( -0.000000  0.000000 -0.000006  0.000000  0.000006  0.000000 ) 
 (  0.000176  0.000000  0.000101  0.000000  0.000140  0.000000 ) 
 ( -0.000176  0.000000  0.000101  0.000000  0.000140  0.000000 ) 
 ( -0.000000  0.000000 -0.000203  0.000000  0.000140  0.000000 ) 
 ( -0.000002  0.000000 -0.000001  0.000000 -0.000006  0.000000 ) 
 (  0.000002  0.000000 -0.000001  0.000000 -0.000006  0.000000 ) 
 (  0.000000  0.000000  0.000002  0.000000 -0.000006  0.000000 ) 
 ( -0.000000  0.000000  0.000002  0.000000 -0.000006  0.000000 ) 
 (  0.000002  0.000000 -0.000001  0.000000 -0.000006  0.000000 ) 
 ( -0.000002  0.000000 -0.000001  0.000000 -0.000006  0.000000 ) 
 ( -0.000005  0.000000 -0.000000  0.000000  0.000006  0.000000 ) 
 (  0.000002  0.000000 -0.000004  0.000000  0.000006  0.000000 ) 
 (  0.000002  0.000000  0.000004  0.000000  0.000006  0.000000 ) 
 ( -0.000002  0.000000  0.000004  0.000000  0.000006  0.000000 ) 
 (  0.000005  0.000000 -0.000000  0.000000  0.000006  0.000000 ) 
 ( -0.000002  0.000000 -0.000004  0.000000  0.000006  0.000000 ) 
 ( -0.000008  0.000000 -0.000014  0.000000  0.000017  0.000000 ) 
 (  0.000016  0.000000  0.000000  0.000000  0.000017  0.000000 ) 
 ( -0.000008  0.000000  0.000014  0.000000  0.000017  0.000000 ) 
 (  0.000008  0.000000  0.000014  0.000000  0.000017  0.000000 ) 
 (  0.000008  0.000000 -0.000014  0.000000  0.000017  0.000000 ) 
 ( -0.000016  0.000000  0.000000  0.000000  0.000017  0.000000 ) 
 ( -0.000000  0.000000 -0.000001  0.000000  0.000002  0.000000 ) 
 (  0.000001  0.000000 -0.000000  0.000000  0.000002  0.000000 ) 
 ( -0.000000  0.000000  0.000001  0.000000  0.000002  0.000000 ) 
 (  0.000000  0.000000  0.000001  0.000000  0.000002  0.000000 ) 
 (  0.000000  0.000000 -0.000001  0.000000  0.000002  0.000000 ) 
 ( -0.000001  0.000000 -0.000000  0.000000  0.000002  0.000000 ) 
 (  0.000001  0.000000  0.000003  0.000000 -0.000001  0.000000 ) 
 ( -0.000003  0.000000 -0.000000  0.000000 -0.000001  0.000000 ) 
 (  0.000002  0.000000 -0.000002  0.000000 -0.000001  0.000000 ) 
 ( -0.000002  0.000000 -0.000002  0.000000 -0.000001  0.000000 ) 
 ( -0.000001  0.000000  0.000003  0.000000 -0.000001  0.000000 ) 
 (  0.000003  0.000000 -0.000000  0.000000 -0.000001  0.000000 ) 
 (  0.000011  0.000000  0.000013  0.000000 -0.000105  0.000000 ) 
 ( -0.000017  0.000000  0.000004  0.000000 -0.000105  0.000000 ) 
 (  0.000005  0.000000 -0.000016  0.000000 -0.000105  0.000000 ) 
 ( -0.000005  0.000000 -0.000016  0.000000 -0.000105  0.000000 ) 
 ( -0.000011  0.000000  0.000013  0.000000 -0.000105  0.000000 ) 
 (  0.000017  0.000000  0.000004  0.000000 -0.000105  0.000000 ) 
 ( -0.000000  0.000000  0.000004  0.000000 -0.000002  0.000000 ) 
 ( -0.000004  0.000000 -0.000002  0.000000 -0.000002  0.000000 ) 
 (  0.000004  0.000000 -0.000002  0.000000 -0.000002  0.000000 ) 
 ( -0.000000  0.000000  0.000002  0.000000  0.000001  0.000000 ) 
 ( -0.000002  0.000000 -0.000001  0.000000  0.000001  0.000000 ) 
 (  0.000002  0.000000 -0.000001  0.000000  0.000001  0.000000 ) 
 ( -0.000000  0.000000  0.000121  0.000000  0.000036  0.000000 ) 
 ( -0.000105  0.000000 -0.000061  0.000000  0.000036  0.000000 ) 
 (  0.000105  0.000000 -0.000061  0.000000  0.000036  0.000000 ) 
 (  0.000000  0.000000 -0.000000  0.000000 -0.000461  0.000000 ) 
 (  0.000000  0.000000 -0.000000  0.000000  0.002097  0.000000 ) 
 ( -0.000000  0.000000  0.000000  0.000000  0.062009  0.000000 ) 
 ( -0.000000  0.000000 -0.000002  0.000000  0.000002  0.000000 ) 
 (  0.000002  0.000000  0.000001  0.000000  0.000002  0.000000 ) 
 ( -0.000002  0.000000  0.000001  0.000000  0.000002  0.000000 ) 
 (  0.000000  0.000000 -0.000003  0.000000 -0.000002  0.000000 ) 
 (  0.000003  0.000000  0.000002  0.000000 -0.000002  0.000000 ) 
 ( -0.000003  0.000000  0.000002  0.000000 -0.000002  0.000000 ) 
 (  0.000000  0.000000 -0.000079  0.000000 -0.000094  0.000000 ) 
 (  0.000068  0.000000  0.000040  0.000000 -0.000094  0.000000 ) 
 ( -0.000068  0.000000  0.000040  0.000000 -0.000094  0.000000 ) 
 (  0.000001  0.000000  0.000000  0.000000 -0.000001  0.000000 ) 
 ( -0.000001  0.000000  0.000000  0.000000 -0.000001  0.000000 ) 
 (  0.000000  0.000000 -0.000001  0.000000 -0.000001  0.000000 ) 
 (  0.000006  0.000000  0.000003  0.000000  0.000012  0.000000 ) 
 ( -0.000006  0.000000  0.000003  0.000000  0.000012  0.000000 ) 
 (  0.000000  0.000000 -0.000007  0.000000  0.000012  0.000000 ) 
 (  0.000002  0.000000  0.000001  0.000000 -0.000069  0.000000 ) 
 ( -0.000002  0.000000  0.000001  0.000000 -0.000069  0.000000 ) 
 ( -0.000000  0.000000 -0.000003  0.000000 -0.000069  0.000000 ) 
 (  0.000000  0.000000  0.000002  0.000000 -0.000003  0.000000 ) 
 ( -0.000002  0.000000 -0.000001  0.000000 -0.000003  0.000000 ) 
 (  0.000002  0.000000 -0.000001  0.000000 -0.000003  0.000000 ) 
 (  0.000000  0.000000 -0.000003  0.000000  0.000002  0.000000 ) 
 (  0.000003  0.000000  0.000002  0.000000  0.000002  0.000000 ) 
 ( -0.000003  0.000000  0.000002  0.000000  0.000002  0.000000 ) 
 ( -0.000000  0.000000 -0.000020  0.000000  0.000108  0.000000 ) 
 (  0.000018  0.000000  0.000010  0.000000  0.000108  0.000000 ) 
 ( -0.000018  0.000000  0.000010  0.000000  0.000108  0.000000 ) 
 (  0.000001  0.000000  0.000001  0.000000 -0.000001  0.000000 ) 
 ( -0.000001  0.000000  0.000001  0.000000 -0.000001  0.000000 ) 
 (  0.000000  0.000000 -0.000001  0.000000 -0.000001  0.000000 ) 
 ( -0.000001  0.000000 -0.000001  0.000000  0.000001  0.000000 ) 
 (  0.000001  0.000000 -0.000001  0.000000  0.000001  0.000000 ) 
 (  0.000000  0.000000  0.000001  0.000000  0.000001  0.000000 ) 
 ( -0.000035  0.000000 -0.000020  0.000000  0.000090  0.000000 ) 
 (  0.000035  0.000000 -0.000020  0.000000  0.000090  0.000000 ) 
 ( -0.000000  0.000000  0.000041  0.000000  0.000090  0.000000 ) 
 ( -0.000001  0.000000  0.000003  0.000000  0.000001  0.000000 ) 
 ( -0.000002  0.000000 -0.000002  0.000000  0.000001  0.000000 ) 
 (  0.000003  0.000000 -0.000001  0.000000  0.000001  0.000000 ) 
 ( -0.000003  0.000000 -0.000001  0.000000  0.000001  0.000000 ) 
 (  0.000001  0.000000  0.000003  0.000000  0.000001  0.000000 ) 
 (  0.000002  0.000000 -0.000002  0.000000  0.000001  0.000000 ) 
 (  0.000004  0.000000  0.000002  0.000000 -0.000002  0.000000 ) 
 ( -0.000004  0.000000  0.000003  0.000000 -0.000002  0.000000 ) 
 ( -0.000001  0.000000 -0.000005  0.000000 -0.000002  0.000000 ) 
 (  0.000001  0.000000 -0.000005  0.000000 -0.000002  0.000000 ) 
 ( -0.000004  0.000000  0.000002  0.000000 -0.000002  0.000000 ) 
 (  0.000004  0.000000  0.000003  0.000000 -0.000002  0.000000 ) 
 (  0.000044  0.000000  0.000076  0.000000  0.000025  0.000000 ) 
 ( -0.000088  0.000000  0.000001  0.000000  0.000025  0.000000 ) 
 (  0.000043  0.000000 -0.000076  0.000000  0.000025  0.000000 ) 
 ( -0.000043  0.000000 -0.000076  0.000000  0.000025  0.000000 ) 
 ( -0.000044  0.000000  0.000076  0.000000  0.000025  0.000000 ) 
 (  0.000088  0.000000  0.000001  0.000000  0.000025  0.000000 ) 
 (  0.000002  0.000000  0.000005  0.000000 -0.000003  0.000000 ) 
 ( -0.000005  0.000000 -0.000001  0.000000 -0.000003  0.000000 ) 
 (  0.000003  0.000000 -0.000004  0.000000 -0.000003  0.000000 ) 
 ( -0.000003  0.000000 -0.000004  0.000000 -0.000003  0.000000 ) 
 ( -0.000002  0.000000  0.000005  0.000000 -0.000003  0.000000 ) 
 (  0.000005  0.000000 -0.000001  0.000000 -0.000003  0.000000 ) 
 ( -0.000007  0.000000 -0.000008  0.000000 -0.000001  0.000000 ) 
 (  0.000011  0.000000 -0.000002  0.000000 -0.000001  0.000000 ) 
 ( -0.000003  0.000000  0.000011  0.000000 -0.000001  0.000000 ) 
 (  0.000003  0.000000  0.000011  0.000000 -0.000001  0.000000 ) 
 (  0.000007  0.000000 -0.000008  0.000000 -0.000001  0.000000 ) 
 ( -0.000011  0.000000 -0.000002  0.000000 -0.000001  0.000000 ) 
 ( -0.000013  0.000000 -0.000017  0.000000  0.000015  0.000000 ) 
 (  0.000021  0.000000 -0.000002  0.000000  0.000015  0.000000 ) 
 ( -0.000009  0.000000  0.000020  0.000000  0.000015  0.000000 ) 
 (  0.000009  0.000000  0.000020  0.000000  0.000015  0.000000 ) 
 (  0.000013  0.000000 -0.000017  0.000000  0.000015  0.000000 ) 
 ( -0.000021  0.000000 -0.000002  0.000000  0.000015  0.000000 ) 
 ( -0.000002  0.000000 -0.000007  0.000000  0.000002  0.000000 ) 
 (  0.000007  0.000000  0.000002  0.000000  0.000002  0.000000 ) 
 ( -0.000005  0.000000  0.000006  0.000000  0.000002  0.000000 ) 
 (  0.000005  0.000000  0.000006  0.000000  0.000002  0.000000 ) 
 (  0.000002  0.000000 -0.000007  0.000000  0.000002  0.000000 ) 
 ( -0.000007  0.000000  0.000002  0.000000  0.000002  0.000000 ) 
 (  0.000003  0.000000 -0.000002  0.000000  0.000001  0.000000 ) 
 (  0.000000  0.000000  0.000003  0.000000  0.000001  0.000000 ) 
 ( -0.000003  0.000000 -0.000001  0.000000  0.000001  0.000000 ) 
 (  0.000003  0.000000 -0.000001  0.000000  0.000001  0.000000 ) 
 ( -0.000003  0.000000 -0.000002  0.000000  0.000001  0.000000 ) 
 ( -0.000000  0.000000  0.000003  0.000000  0.000001  0.000000 ) 
 ( -0.000015  0.000000 -0.000012  0.000000 -0.000008  0.000000 ) 
 (  0.000018  0.000000 -0.000007  0.000000 -0.000008  0.000000 ) 
 ( -0.000003  0.000000  0.000019  0.000000 -0.000008  0.000000 ) 
 (  0.000003  0.000000  0.000019  0.000000 -0.000008  0.000000 ) 
 (  0.000015  0.000000 -0.000012  0.000000 -0.000008  0.000000 ) 
 ( -0.000018  0.000000 -0.000007  0.000000 -0.000008  0.000000 ) 
 ( -0.000000  0.000000 -0.000000  0.000000  0.007408  0.000000 ) 
 (  0.000000  0.000000  0.000000  0.000000 -0.033753  0.000000 ) 
 (  0.000000  0.000000  0.000000  0.000000 -0.997473  0.000000 ) 
 ( -0.000002  0.000000 -0.000001  0.000000  0.000029  0.000000 ) 
 (  0.000002  0.000000 -0.000001  0.000000  0.000029  0.000000 ) 
 ( -0.000000  0.000000  0.000002  0.000000  0.000029  0.000000 ) 
 ( -0.000036  0.000000 -0.000021  0.000000 -0.000268  0.000000 ) 
 (  0.000036  0.000000 -0.000021  0.000000 -0.000268  0.000000 ) 
 ( -0.000000  0.000000  0.000041  0.000000 -0.000268  0.000000 ) 
 (  0.000090  0.000000  0.000052  0.000000  0.000950  0.000000 ) 
 ( -0.000090  0.000000  0.000052  0.000000  0.000950  0.000000 ) 
 (  0.000000  0.000000 -0.000104  0.000000  0.000950  0.000000 ) 
     freq (  486) =     115.609828 [THz] =    3856.328776 [cm-1]
 ( -0.000000  0.000000  0.000000  0.000000 -0.000394  0.000000 ) 
 (  0.000000  0.000000 -0.000000  0.000000 -0.000001  0.000000 ) 
 (  0.000000  0.000000  0.000000  0.000000 -0.000003  0.000000 ) 
 ( -0.000176  0.000000 -0.000102  0.000000 -0.000138  0.000000 ) 
 (  0.000176  0.000000 -0.000102  0.000000 -0.000138  0.000000 ) 
 (  0.000000  0.000000  0.000204  0.000000 -0.000138  0.000000 ) 
 (  0.000001  0.000000  0.000001  0.000000  0.000002  0.000000 ) 
 ( -0.000001  0.000000  0.000001  0.000000  0.000002  0.000000 ) 
 (  0.000000  0.000000 -0.000002  0.000000  0.000002  0.000000 ) 
 ( -0.000000  0.000000 -0.000000  0.000000 -0.000003  0.000000 ) 
 (  0.000000  0.000000 -0.000000  0.000000 -0.000003  0.000000 ) 
 ( -0.000000  0.000000  0.000000  0.000000 -0.000003  0.000000 ) 
 (  0.000008  0.000000  0.000013  0.000000 -0.000017  0.000000 ) 
 ( -0.000016  0.000000 -0.000000  0.000000 -0.000017  0.000000 ) 
 (  0.000008  0.000000 -0.000013  0.000000 -0.000017  0.000000 ) 
 ( -0.000008  0.000000 -0.000013  0.000000 -0.000017  0.000000 ) 
 ( -0.000008  0.000000  0.000013  0.000000 -0.000017  0.000000 ) 
 (  0.000016  0.000000 -0.000000  0.000000 -0.000017  0.000000 ) 
 (  0.000002  0.000000  0.000001  0.000000  0.000006  0.000000 ) 
 ( -0.000002  0.000000  0.000001  0.000000  0.000006  0.000000 ) 
 ( -0.000000  0.000000 -0.000002  0.000000  0.000006  0.000000 ) 
 (  0.000000  0.000000 -0.000002  0.000000  0.000006  0.000000 ) 
 ( -0.000002  0.000000  0.000001  0.000000  0.000006  0.000000 ) 
 (  0.000002  0.000000  0.000001  0.000000  0.000006  0.000000 ) 
 (  0.000004  0.000000 -0.000000  0.000000 -0.000006  0.000000 ) 
 ( -0.000002  0.000000  0.000004  0.000000 -0.000006  0.000000 ) 
 ( -0.000002  0.000000 -0.000003  0.000000 -0.000006  0.000000 ) 
 (  0.000002  0.000000 -0.000003  0.000000 -0.000006  0.000000 ) 
 ( -0.000004  0.000000 -0.000000  0.000000 -0.000006  0.000000 ) 
 (  0.000002  0.000000  0.000004  0.000000 -0.000006  0.000000 ) 
 ( -0.000012  0.000000 -0.000013  0.000000  0.000105  0.000000 ) 
 (  0.000017  0.000000 -0.000004  0.000000  0.000105  0.000000 ) 
 ( -0.000005  0.000000  0.000016  0.000000  0.000105  0.000000 ) 
 (  0.000005  0.000000  0.000016  0.000000  0.000105  0.000000 ) 
 (  0.000012  0.000000 -0.000013  0.000000  0.000105  0.000000 ) 
 ( -0.000017  0.000000 -0.000004  0.000000  0.000105  0.000000 ) 
 (  0.000000  0.000000  0.000001  0.000000 -0.000001  0.000000 ) 
 ( -0.000001  0.000000  0.000000  0.000000 -0.000001  0.000000 ) 
 (  0.000000  0.000000 -0.000001  0.000000 -0.000001  0.000000 ) 
 ( -0.000000  0.000000 -0.000001  0.000000 -0.000001  0.000000 ) 
 ( -0.000000  0.000000  0.000001  0.000000 -0.000001  0.000000 ) 
 (  0.000001  0.000000  0.000000  0.000000 -0.000001  0.000000 ) 
 ( -0.000001  0.000000 -0.000002  0.000000 -0.000001  0.000000 ) 
 (  0.000003  0.000000  0.000000  0.000000 -0.000001  0.000000 ) 
 ( -0.000002  0.000000  0.000002  0.000000 -0.000001  0.000000 ) 
 (  0.000002  0.000000  0.000002  0.000000 -0.000001  0.000000 ) 
 (  0.000001  0.000000 -0.000002  0.000000 -0.000001  0.000000 ) 
 ( -0.000003  0.000000  0.000000  0.000000 -0.000001  0.000000 ) 
 (  0.000000  0.000000 -0.000121  0.000000 -0.000038  0.000000 ) 
 (  0.000104  0.000000  0.000060  0.000000 -0.000038  0.000000 ) 
 ( -0.000104  0.000000  0.000060  0.000000 -0.000038  0.000000 ) 
 (  0.000000  0.000000 -0.000006  0.000000  0.000002  0.000000 ) 
 (  0.000005  0.000000  0.000003  0.000000  0.000002  0.000000 ) 
 ( -0.000005  0.000000  0.000003  0.000000  0.000002  0.000000 ) 
 ( -0.000000  0.000000  0.000000  0.000000  0.000000  0.000000 ) 
 ( -0.000000  0.000000 -0.000000  0.000000  0.000000  0.000000 ) 
 (  0.000000  0.000000 -0.000000  0.000000  0.000000  0.000000 ) 
 (  0.000000  0.000000  0.000000  0.000000 -0.062050  0.000000 ) 
 ( -0.000000  0.000000  0.000000  0.000000  0.000060  0.000000 ) 
 ( -0.000000  0.000000  0.000000  0.000000 -0.000462  0.000000 ) 
 (  0.000000  0.000000  0.000079  0.000000  0.000095  0.000000 ) 
 ( -0.000068  0.000000 -0.000039  0.000000  0.000095  0.000000 ) 
 (  0.000068  0.000000 -0.000039  0.000000  0.000095  0.000000 ) 
 ( -0.000000  0.000000  0.000003  0.000000 -0.000001  0.000000 ) 
 ( -0.000002  0.000000 -0.000001  0.000000 -0.000001  0.000000 ) 
 (  0.000002  0.000000 -0.000001  0.000000 -0.000001  0.000000 ) 
 (  0.000000  0.000000  0.000001  0.000000 -0.000000  0.000000 ) 
 ( -0.000001  0.000000 -0.000001  0.000000 -0.000000  0.000000 ) 
 (  0.000001  0.000000 -0.000001  0.000000 -0.000000  0.000000 ) 
 ( -0.000002  0.000000 -0.000001  0.000000  0.000068  0.000000 ) 
 (  0.000002  0.000000 -0.000001  0.000000  0.000068  0.000000 ) 
 (  0.000000  0.000000  0.000002  0.000000  0.000068  0.000000 ) 
 ( -0.000001  0.000000 -0.000000  0.000000  0.000001  0.000000 ) 
 (  0.000001  0.000000 -0.000000  0.000000  0.000001  0.000000 ) 
 ( -0.000000  0.000000  0.000001  0.000000  0.000001  0.000000 ) 
 ( -0.000006  0.000000 -0.000004  0.000000 -0.000013  0.000000 ) 
 (  0.000006  0.000000 -0.000004  0.000000 -0.000013  0.000000 ) 
 ( -0.000000  0.000000  0.000007  0.000000 -0.000013  0.000000 ) 
 ( -0.000000  0.000000  0.000021  0.000000 -0.000108  0.000000 ) 
 ( -0.000018  0.000000 -0.000011  0.000000 -0.000108  0.000000 ) 
 (  0.000018  0.000000 -0.000011  0.000000 -0.000108  0.000000 ) 
 (  0.000000  0.000000 -0.000002  0.000000  0.000002  0.000000 ) 
 (  0.000002  0.000000  0.000001  0.000000  0.000002  0.000000 ) 
 ( -0.000002  0.000000  0.000001  0.000000  0.000002  0.000000 ) 
 ( -0.000000  0.000000  0.000003  0.000000  0.000001  0.000000 ) 
 ( -0.000002  0.000000 -0.000001  0.000000  0.000001  0.000000 ) 
 (  0.000002  0.000000 -0.000001  0.000000  0.000001  0.000000 ) 
 (  0.000034  0.000000  0.000020  0.000000 -0.000090  0.000000 ) 
 ( -0.000034  0.000000  0.000020  0.000000 -0.000090  0.000000 ) 
 ( -0.000000  0.000000 -0.000040  0.000000 -0.000090  0.000000 ) 
 ( -0.000001  0.000000 -0.000001  0.000000  0.000000  0.000000 ) 
 (  0.000001  0.000000 -0.000001  0.000000  0.000000  0.000000 ) 
 ( -0.000000  0.000000  0.000001  0.000000  0.000000  0.000000 ) 
 ( -0.000000  0.000000 -0.000000  0.000000  0.000001  0.000000 ) 
 (  0.000000  0.000000 -0.000000  0.000000  0.000001  0.000000 ) 
 (  0.000000  0.000000  0.000000  0.000000  0.000001  0.000000 ) 
 ( -0.000045  0.000000 -0.000075  0.000000 -0.000025  0.000000 ) 
 (  0.000088  0.000000 -0.000001  0.000000 -0.000025  0.000000 ) 
 ( -0.000043  0.000000  0.000076  0.000000 -0.000025  0.000000 ) 
 (  0.000043  0.000000  0.000076  0.000000 -0.000025  0.000000 ) 
 (  0.000045  0.000000 -0.000075  0.000000 -0.000025  0.000000 ) 
 ( -0.000088  0.000000 -0.000001  0.000000 -0.000025  0.000000 ) 
 (  0.000000  0.000000 -0.000004  0.000000 -0.000001  0.000000 ) 
 (  0.000003  0.000000  0.000002  0.000000 -0.000001  0.000000 ) 
 ( -0.000003  0.000000  0.000002  0.000000 -0.000001  0.000000 ) 
 (  0.000003  0.000000  0.000002  0.000000 -0.000001  0.000000 ) 
 ( -0.000000  0.000000 -0.000004  0.000000 -0.000001  0.000000 ) 
 ( -0.000003  0.000000  0.000002  0.000000 -0.000001  0.000000 ) 
 ( -0.000004  0.000000  0.000000  0.000000  0.000003  0.000000 ) 
 (  0.000002  0.000000 -0.000003  0.000000  0.000003  0.000000 ) 
 (  0.000002  0.000000  0.000003  0.000000  0.000003  0.000000 ) 
 ( -0.000002  0.000000  0.000003  0.000000  0.000003  0.000000 ) 
 (  0.000004  0.000000  0.000000  0.000000  0.000003  0.000000 ) 
 ( -0.000002  0.000000 -0.000003  0.000000  0.000003  0.000000 ) 
 (  0.000012  0.000000  0.000018  0.000000 -0.000015  0.000000 ) 
 ( -0.000022  0.000000  0.000002  0.000000 -0.000015  0.000000 ) 
 (  0.000009  0.000000 -0.000020  0.000000 -0.000015  0.000000 ) 
 ( -0.000009  0.000000 -0.000020  0.000000 -0.000015  0.000000 ) 
 ( -0.000012  0.000000  0.000018  0.000000 -0.000015  0.000000 ) 
 (  0.000022  0.000000  0.000002  0.000000 -0.000015  0.000000 ) 
 ( -0.000002  0.000000 -0.000005  0.000000  0.000003  0.000000 ) 
 (  0.000005  0.000000  0.000001  0.000000  0.000003  0.000000 ) 
 ( -0.000003  0.000000  0.000004  0.000000  0.000003  0.000000 ) 
 (  0.000003  0.000000  0.000004  0.000000  0.000003  0.000000 ) 
 (  0.000002  0.000000 -0.000005  0.000000  0.000003  0.000000 ) 
 ( -0.000005  0.000000  0.000001  0.000000  0.000003  0.000000 ) 
 (  0.000007  0.000000  0.000008  0.000000  0.000002  0.000000 ) 
 ( -0.000010  0.000000  0.000002  0.000000  0.000002  0.000000 ) 
 (  0.000003  0.000000 -0.000010  0.000000  0.000002  0.000000 ) 
 ( -0.000003  0.000000 -0.000010  0.000000  0.000002  0.000000 ) 
 ( -0.000007  0.000000  0.000008  0.000000  0.000002  0.000000 ) 
 (  0.000010  0.000000  0.000002  0.000000  0.000002  0.000000 ) 
 (  0.000016  0.000000  0.000012  0.000000  0.000009  0.000000 ) 
 ( -0.000018  0.000000  0.000007  0.000000  0.000009  0.000000 ) 
 (  0.000003  0.000000 -0.000019  0.000000  0.000009  0.000000 ) 
 ( -0.000003  0.000000 -0.000019  0.000000  0.000009  0.000000 ) 
 ( -0.000016  0.000000  0.000012  0.000000  0.000009  0.000000 ) 
 (  0.000018  0.000000  0.000007  0.000000  0.000009  0.000000 ) 
 (  0.000002  0.000000  0.000007  0.000000 -0.000002  0.000000 ) 
 ( -0.000008  0.000000 -0.000002  0.000000 -0.000002  0.000000 ) 
 (  0.000005  0.000000 -0.000006  0.000000 -0.000002  0.000000 ) 
 ( -0.000005  0.000000 -0.000006  0.000000 -0.000002  0.000000 ) 
 ( -0.000002  0.000000  0.000007  0.000000 -0.000002  0.000000 ) 
 (  0.000008  0.000000 -0.000002  0.000000 -0.000002  0.000000 ) 
 ( -0.000003  0.000000  0.000002  0.000000 -0.000002  0.000000 ) 
 (  0.000000  0.000000 -0.000004  0.000000 -0.000002  0.000000 ) 
 (  0.000003  0.000000  0.000002  0.000000 -0.000002  0.000000 ) 
 ( -0.000003  0.000000  0.000002  0.000000 -0.000002  0.000000 ) 
 (  0.000003  0.000000  0.000002  0.000000 -0.000002  0.000000 ) 
 ( -0.000000  0.000000 -0.000004  0.000000 -0.000002  0.000000 ) 
 ( -0.000000  0.000000  0.000000  0.000000  0.998043  0.000000 ) 
 ( -0.000000  0.000000 -0.000000  0.000000 -0.000963  0.000000 ) 
 (  0.000000  0.000000 -0.000000  0.000000  0.007447  0.000000 ) 
 ( -0.000098  0.000000 -0.000056  0.000000 -0.000927  0.000000 ) 
 (  0.000098  0.000000 -0.000056  0.000000 -0.000927  0.000000 ) 
 (  0.000000  0.000000  0.000113  0.000000 -0.000927  0.000000 ) 
 (  0.000000  0.000000  0.000000  0.000000 -0.000039  0.000000 ) 
 ( -0.000000  0.000000  0.000000  0.000000 -0.000039  0.000000 ) 
 (  0.000000  0.000000 -0.000000  0.000000 -0.000039  0.000000 ) 
 (  0.000038  0.000000  0.000022  0.000000  0.000281  0.000000 ) 
 ( -0.000038  0.000000  0.000022  0.000000  0.000281  0.000000 ) 
 (  0.000000  0.000000 -0.000044  0.000000  0.000281  0.000000 ) 
 **************************************************************************


 Eigendisplacements of OH stretching modes from dynamical matrix restricted to OH groups of the hexagonal cell 


     freq (  475) =     109.482586 [THz] =    3651.945980 [cm-1]
 (  0.000000   0.000000     0.000000   0.000000    -0.000000   0.000000   )
 (  0.000000   0.000000     0.000000   0.000000    -0.000000   0.000000   )
 (  0.000000   0.000000     0.000000   0.000000    -0.000000   0.000000   )
 ( -0.000000   0.000000    -0.000000   0.000000     0.000000   0.000000   )
 (  0.000000   0.000000    -0.000000   0.000000     0.000000   0.000000   )
 ( -0.000000   0.000000     0.000000   0.000000     0.000000   0.000000   )
 ( -0.000000   0.000000    -0.000000   0.000000     0.000000   0.000000   )
 (  0.000000   0.000000    -0.000000   0.000000     0.000000   0.000000   )
 ( -0.000000   0.000000     0.000000   0.000000     0.000000   0.000000   )
 ( -0.000000   0.000000    -0.000000   0.000000     0.000000   0.000000   )
 (  0.000000   0.000000    -0.000000   0.000000     0.000000   0.000000   )
 (  0.000000   0.000000     0.000000   0.000000     0.000000   0.000000   )
 ( -0.000000   0.000000     0.000000   0.000000     0.000000   0.000000   )
 ( -0.000000   0.000000    -0.000000   0.000000     0.000000   0.000000   )
 (  0.000000   0.000000    -0.000000   0.000000     0.000000   0.000000   )
 ( -0.000000   0.000000    -0.000000   0.000000     0.000000   0.000000   )
 (  0.000000   0.000000     0.000000   0.000000     0.000000   0.000000   )
 (  0.000000   0.000000    -0.000000   0.000000     0.000000   0.000000   )
 ( -0.000000   0.000000     0.000000   0.000000     0.000000   0.000000   )
 ( -0.000000   0.000000    -0.000000   0.000000     0.000000   0.000000   )
 (  0.000000   0.000000    -0.000000   0.000000     0.000000   0.000000   )
 ( -0.000000   0.000000    -0.000000   0.000000     0.000000   0.000000   )
 (  0.000000   0.000000     0.000000   0.000000     0.000000   0.000000   )
 (  0.000000   0.000000    -0.000000   0.000000     0.000000   0.000000   )
 ( -0.000000   0.000000     0.000000   0.000000     0.000000   0.000000   )
 ( -0.000000   0.000000    -0.000000   0.000000     0.000000   0.000000   )
 (  0.000000   0.000000    -0.000000   0.000000     0.000000   0.000000   )
 ( -0.000000   0.000000    -0.000000   0.000000     0.000000   0.000000   )
 (  0.000000   0.000000     0.000000   0.000000     0.000000   0.000000   )
 (  0.000000   0.000000    -0.000000   0.000000     0.000000   0.000000   )
 (  0.000000   0.000000    -0.000000   0.000000     0.000000   0.000000   )
 (  0.000000   0.000000     0.000000   0.000000     0.000000   0.000000   )
 ( -0.000000   0.000000     0.000000   0.000000     0.000000   0.000000   )
 (  0.000000   0.000000     0.000000   0.000000     0.000000   0.000000   )
 ( -0.000000   0.000000    -0.000000   0.000000     0.000000   0.000000   )
 ( -0.000000   0.000000     0.000000   0.000000     0.000000   0.000000   )
 (  0.000000   0.000000    -0.000000   0.000000     0.000000   0.000000   )
 (  0.000000   0.000000     0.000000   0.000000     0.000000   0.000000   )
 ( -0.000000   0.000000     0.000000   0.000000     0.000000   0.000000   )
 (  0.000000   0.000000     0.000000   0.000000     0.000000   0.000000   )
 ( -0.000000   0.000000    -0.000000   0.000000     0.000000   0.000000   )
 ( -0.000000   0.000000     0.000000   0.000000     0.000000   0.000000   )
 (  0.000000   0.000000    -0.000000   0.000000     0.000000   0.000000   )
 (  0.000000   0.000000     0.000000   0.000000     0.000000   0.000000   )
 ( -0.000000   0.000000     0.000000   0.000000     0.000000   0.000000   )
 (  0.000000   0.000000     0.000000   0.000000     0.000000   0.000000   )
 ( -0.000000   0.000000    -0.000000   0.000000     0.000000   0.000000   )
 ( -0.000000   0.000000     0.000000   0.000000     0.000000   0.000000   )
 ( -0.000000   0.000000    -0.000000   0.000000     0.000000   0.000000   )
 (  0.000000   0.000000     0.000000   0.000000     0.000000   0.000000   )
 ( -0.000000   0.000000     0.000000   0.000000     0.000000   0.000000   )
 ( -0.000000   0.000000    -0.000000   0.000000     0.000000   0.000000   )
 (  0.000000   0.000000     0.000000   0.000000     0.000000   0.000000   )
 ( -0.000000   0.000000     0.000000   0.000000     0.000000   0.000000   )
 ( -0.000000   0.000000    -0.000000   0.000000     0.000000   0.000000   )
 (  0.000000   0.000000     0.000000   0.000000     0.000000   0.000000   )
 ( -0.000000   0.000000     0.000000   0.000000     0.000000   0.000000   )
 ( -0.000000   0.000000    -0.000000   0.000000    -0.000004   0.000000   )
 ( -0.000000   0.000000     0.000000   0.000000    -0.000002   0.000000   )
 ( -0.000000   0.000000    -0.000000   0.000000    -0.000003   0.000000   )
 (  0.000000   0.000000     0.000000   0.000000     0.000000   0.000000   )
 ( -0.000000   0.000000    -0.000000   0.000000     0.000000   0.000000   )
 (  0.000000   0.000000    -0.000000   0.000000     0.000000   0.000000   )
 (  0.000000   0.000000     0.000000   0.000000     0.000000   0.000000   )
 ( -0.000000   0.000000    -0.000000   0.000000     0.000000   0.000000   )
 (  0.000000   0.000000    -0.000000   0.000000     0.000000   0.000000   )
 (  0.000000   0.000000     0.000000   0.000000     0.000000   0.000000   )
 ( -0.000000   0.000000    -0.000000   0.000000     0.000000   0.000000   )
 (  0.000000   0.000000    -0.000000   0.000000     0.000000   0.000000   )
 (  0.000185   0.000000     0.000107   0.000000     0.019849   0.000000   )
 ( -0.000185   0.000000     0.000107   0.000000     0.019849   0.000000   )
 ( -0.000000   0.000000    -0.000213   0.000000     0.019849   0.000000   )
 (  0.000196   0.000000     0.000113   0.000000     0.021084   0.000000   )
 ( -0.000196   0.000000     0.000113   0.000000     0.021084   0.000000   )
 ( -0.000000   0.000000    -0.000226   0.000000     0.021084   0.000000   )
 (  0.000199   0.000000     0.000115   0.000000     0.021313   0.000000   )
 ( -0.000199   0.000000     0.000115   0.000000     0.021313   0.000000   )
 ( -0.000000   0.000000    -0.000230   0.000000     0.021313   0.000000   )
 ( -0.000000   0.000000     0.000000   0.000000     0.000000   0.000000   )
 ( -0.000000   0.000000    -0.000000   0.000000     0.000000   0.000000   )
 (  0.000000   0.000000    -0.000000   0.000000     0.000000   0.000000   )
 ( -0.000000   0.000000     0.000000   0.000000     0.000000   0.000000   )
 ( -0.000000   0.000000    -0.000000   0.000000     0.000000   0.000000   )
 (  0.000000   0.000000    -0.000000   0.000000     0.000000   0.000000   )
 ( -0.000000   0.000000     0.000000   0.000000     0.000000   0.000000   )
 ( -0.000000   0.000000    -0.000000   0.000000     0.000000   0.000000   )
 (  0.000000   0.000000    -0.000000   0.000000     0.000000   0.000000   )
 ( -0.000000   0.000000    -0.000000   0.000000    -0.000000   0.000000   )
 (  0.000000   0.000000    -0.000000   0.000000    -0.000000   0.000000   )
 ( -0.000000   0.000000     0.000000   0.000000    -0.000000   0.000000   )
 ( -0.000000   0.000000    -0.000000   0.000000    -0.000000   0.000000   )
 (  0.000000   0.000000    -0.000000   0.000000    -0.000000   0.000000   )
 ( -0.000000   0.000000     0.000000   0.000000    -0.000000   0.000000   )
 ( -0.000000   0.000000    -0.000000   0.000000    -0.000000   0.000000   )
 (  0.000000   0.000000    -0.000000   0.000000    -0.000000   0.000000   )
 ( -0.000000   0.000000     0.000000   0.000000    -0.000000   0.000000   )
 (  0.000000   0.000000     0.000000   0.000000    -0.000000   0.000000   )
 ( -0.000000   0.000000     0.000000   0.000000    -0.000000   0.000000   )
 (  0.000000   0.000000    -0.000000   0.000000    -0.000000   0.000000   )
 ( -0.000000   0.000000    -0.000000   0.000000    -0.000000   0.000000   )
 ( -0.000000   0.000000     0.000000   0.000000    -0.000000   0.000000   )
 (  0.000000   0.000000     0.000000   0.000000    -0.000000   0.000000   )
 (  0.000000   0.000000     0.000000   0.000000    -0.000000   0.000000   )
 ( -0.000000   0.000000     0.000000   0.000000    -0.000000   0.000000   )
 (  0.000000   0.000000    -0.000000   0.000000    -0.000000   0.000000   )
 ( -0.000000   0.000000    -0.000000   0.000000    -0.000000   0.000000   )
 ( -0.000000   0.000000     0.000000   0.000000    -0.000000   0.000000   )
 (  0.000000   0.000000     0.000000   0.000000    -0.000000   0.000000   )
 (  0.000000   0.000000     0.000000   0.000000    -0.000000   0.000000   )
 ( -0.000000   0.000000     0.000000   0.000000    -0.000000   0.000000   )
 (  0.000000   0.000000    -0.000000   0.000000    -0.000000   0.000000   )
 ( -0.000000   0.000000    -0.000000   0.000000    -0.000000   0.000000   )
 ( -0.000000   0.000000     0.000000   0.000000    -0.000000   0.000000   )
 (  0.000000   0.000000     0.000000   0.000000    -0.000000   0.000000   )
 ( -0.000000   0.000000     0.000000   0.000000     0.000000   0.000000   )
 ( -0.000000   0.000000    -0.000000   0.000000     0.000000   0.000000   )
 (  0.000000   0.000000    -0.000000   0.000000     0.000000   0.000000   )
 ( -0.000000   0.000000    -0.000000   0.000000     0.000000   0.000000   )
 (  0.000000   0.000000     0.000000   0.000000     0.000000   0.000000   )
 (  0.000000   0.000000    -0.000000   0.000000     0.000000   0.000000   )
 ( -0.000000   0.000000     0.000000   0.000000     0.000000   0.000000   )
 ( -0.000000   0.000000    -0.000000   0.000000     0.000000   0.000000   )
 (  0.000000   0.000000    -0.000000   0.000000     0.000000   0.000000   )
 ( -0.000000   0.000000    -0.000000   0.000000     0.000000   0.000000   )
 (  0.000000   0.000000     0.000000   0.000000     0.000000   0.000000   )
 (  0.000000   0.000000    -0.000000   0.000000     0.000000   0.000000   )
 ( -0.000000   0.000000     0.000000   0.000000     0.000000   0.000000   )
 ( -0.000000   0.000000    -0.000000   0.000000     0.000000   0.000000   )
 (  0.000000   0.000000    -0.000000   0.000000     0.000000   0.000000   )
 ( -0.000000   0.000000    -0.000000   0.000000     0.000000   0.000000   )
 (  0.000000   0.000000     0.000000   0.000000     0.000000   0.000000   )
 (  0.000000   0.000000    -0.000000   0.000000     0.000000   0.000000   )
 ( -0.000000   0.000000    -0.000000   0.000000    -0.000000   0.000000   )
 (  0.000000   0.000000     0.000000   0.000000    -0.000000   0.000000   )
 ( -0.000000   0.000000     0.000000   0.000000    -0.000000   0.000000   )
 (  0.000000   0.000000     0.000000   0.000000    -0.000000   0.000000   )
 (  0.000000   0.000000    -0.000000   0.000000    -0.000000   0.000000   )
 ( -0.000000   0.000000     0.000000   0.000000    -0.000000   0.000000   )
 ( -0.000000   0.000000    -0.000000   0.000000    -0.000000   0.000000   )
 (  0.000000   0.000000     0.000000   0.000000    -0.000000   0.000000   )
 ( -0.000000   0.000000     0.000000   0.000000    -0.000000   0.000000   )
 (  0.000000   0.000000     0.000000   0.000000    -0.000000   0.000000   )
 (  0.000000   0.000000    -0.000000   0.000000    -0.000000   0.000000   )
 ( -0.000000   0.000000     0.000000   0.000000    -0.000000   0.000000   )
 (  0.000000   0.000000    -0.000000   0.000000    -0.000000   0.000000   )
 (  0.000000   0.000000     0.000000   0.000000    -0.000000   0.000000   )
 ( -0.000000   0.000000     0.000000   0.000000    -0.000000   0.000000   )
 (  0.000000   0.000000     0.000000   0.000000    -0.000000   0.000000   )
 ( -0.000000   0.000000    -0.000000   0.000000    -0.000000   0.000000   )
 ( -0.000000   0.000000     0.000000   0.000000    -0.000000   0.000000   )
 (  0.000000   0.000000     0.000000   0.000000    -0.000671   0.000000   )
 (  0.000000   0.000000     0.000000   0.000000    -0.000752   0.000000   )
 (  0.000000   0.000000     0.000000   0.000000    -0.000753   0.000000   )
 ( -0.001057   0.000000    -0.000610   0.000000    -0.318104   0.000000   )
 (  0.001057   0.000000    -0.000610   0.000000    -0.318104   0.000000   )
 (  0.000000   0.000000     0.001220   0.000000    -0.318104   0.000000   )
 ( -0.001139   0.000000    -0.000658   0.000000    -0.337886   0.000000   )
 (  0.001139   0.000000    -0.000658   0.000000    -0.337886   0.000000   )
 (  0.000000   0.000000     0.001315   0.000000    -0.337886   0.000000   )
 ( -0.001160   0.000000    -0.000670   0.000000    -0.341581   0.000000   )
 (  0.001160   0.000000    -0.000670   0.000000    -0.341581   0.000000   )
 (  0.000000   0.000000     0.001339   0.000000    -0.341581   0.000000   )
     freq (  476) =     109.498046 [THz] =    3652.461671 [cm-1]
 ( -0.000000   0.000000     0.000000   0.000000     0.000000   0.000000   )
 ( -0.000000   0.000000     0.000000   0.000000     0.000000   0.000000   )
 (  0.000000   0.000000     0.000000   0.000000    -0.000000   0.000000   )
 (  0.000000   0.000000     0.000000   0.000000    -0.000000   0.000000   )
 ( -0.000000   0.000000     0.000000   0.000000    -0.000000   0.000000   )
 (  0.000000   0.000000    -0.000000   0.000000    -0.000000   0.000000   )
 (  0.000000   0.000000     0.000000   0.000000    -0.000000   0.000000   )
 ( -0.000000   0.000000     0.000000   0.000000    -0.000000   0.000000   )
 ( -0.000000   0.000000    -0.000000   0.000000    -0.000000   0.000000   )
 ( -0.000000   0.000000    -0.000000   0.000000     0.000000   0.000000   )
 (  0.000000   0.000000    -0.000000   0.000000     0.000000   0.000000   )
 ( -0.000000   0.000000     0.000000   0.000000     0.000000   0.000000   )
 (  0.000000   0.000000     0.000000   0.000000     0.000000   0.000000   )
 ( -0.000000   0.000000    -0.000000   0.000000     0.000000   0.000000   )
 (  0.000000   0.000000    -0.000000   0.000000     0.000000   0.000000   )
 ( -0.000000   0.000000    -0.000000   0.000000     0.000000   0.000000   )
 ( -0.000000   0.000000     0.000000   0.000000     0.000000   0.000000   )
 (  0.000000   0.000000    -0.000000   0.000000     0.000000   0.000000   )
 (  0.000000   0.000000    -0.000000   0.000000    -0.000000   0.000000   )
 (  0.000000   0.000000     0.000000   0.000000    -0.000000   0.000000   )
 ( -0.000000   0.000000    -0.000000   0.000000    -0.000000   0.000000   )
 (  0.000000   0.000000    -0.000000   0.000000    -0.000000   0.000000   )
 ( -0.000000   0.000000    -0.000000   0.000000    -0.000000   0.000000   )
 ( -0.000000   0.000000     0.000000   0.000000    -0.000000   0.000000   )
 ( -0.000000   0.000000     0.000000   0.000000     0.000000   0.000000   )
 ( -0.000000   0.000000    -0.000000   0.000000     0.000000   0.000000   )
 (  0.000000   0.000000     0.000000   0.000000     0.000000   0.000000   )
 ( -0.000000   0.000000     0.000000   0.000000     0.000000   0.000000   )
 (  0.000000   0.000000     0.000000   0.000000     0.000000   0.000000   )
 (  0.000000   0.000000    -0.000000   0.000000     0.000000   0.000000   )
 ( -0.000000   0.000000     0.000000   0.000000    -0.000000   0.000000   )
 ( -0.000000   0.000000    -0.000000   0.000000    -0.000000   0.000000   )
 (  0.000000   0.000000    -0.000000   0.000000    -0.000000   0.000000   )
 ( -0.000000   0.000000    -0.000000   0.000000    -0.000000   0.000000   )
 (  0.000000   0.000000     0.000000   0.000000    -0.000000   0.000000   )
 (  0.000000   0.000000    -0.000000   0.000000    -0.000000   0.000000   )
 ( -0.000000   0.000000     0.000000   0.000000    -0.000000   0.000000   )
 ( -0.000000   0.000000    -0.000000   0.000000    -0.000000   0.000000   )
 (  0.000000   0.000000    -0.000000   0.000000    -0.000000   0.000000   )
 ( -0.000000   0.000000    -0.000000   0.000000    -0.000000   0.000000   )
 (  0.000000   0.000000     0.000000   0.000000    -0.000000   0.000000   )
 (  0.000000   0.000000    -0.000000   0.000000    -0.000000   0.000000   )
 (  0.000000   0.000000    -0.000000   0.000000     0.000000   0.000000   )
 (  0.000000   0.000000     0.000000   0.000000     0.000000   0.000000   )
 ( -0.000000   0.000000     0.000000   0.000000     0.000000   0.000000   )
 (  0.000000   0.000000     0.000000   0.000000     0.000000   0.000000   )
 ( -0.000000   0.000000    -0.000000   0.000000     0.000000   0.000000   )
 ( -0.000000   0.000000     0.000000   0.000000     0.000000   0.000000   )
 (  0.000000   0.000000    -0.000000   0.000000     0.000000   0.000000   )
 (  0.000000   0.000000     0.000000   0.000000     0.000000   0.000000   )
 ( -0.000000   0.000000     0.000000   0.000000     0.000000   0.000000   )
 (  0.000000   0.000000     0.000000   0.000000     0.000000   0.000000   )
 ( -0.000000   0.000000    -0.000000   0.000000     0.000000   0.000000   )
 (  0.000000   0.000000    -0.000000   0.000000     0.000000   0.000000   )
 ( -0.000000   0.000000     0.000000   0.000000    -0.000000   0.000000   )
 ( -0.000000   0.000000    -0.000000   0.000000    -0.000000   0.000000   )
 (  0.000000   0.000000    -0.000000   0.000000    -0.000000   0.000000   )
 (  0.000000   0.000000    -0.000000   0.000000    -0.000031   0.000000   )
 (  0.000000   0.000000    -0.000000   0.000000    -0.000001   0.000000   )
 ( -0.000000   0.000000     0.000000   0.000000     0.000031   0.000000   )
 ( -0.000000   0.000000     0.000000   0.000000    -0.000000   0.000000   )
 ( -0.000000   0.000000    -0.000000   0.000000    -0.000000   0.000000   )
 (  0.000000   0.000000    -0.000000   0.000000    -0.000000   0.000000   )
 ( -0.000000   0.000000    -0.000000   0.000000    -0.000000   0.000000   )
 (  0.000000   0.000000     0.000000   0.000000    -0.000000   0.000000   )
 ( -0.000000   0.000000     0.000000   0.000000    -0.000000   0.000000   )
 (  0.000000   0.000000     0.000000   0.000000     0.000000   0.000000   )
 ( -0.000000   0.000000    -0.000000   0.000000     0.000000   0.000000   )
 (  0.000000   0.000000    -0.000000   0.000000     0.000000   0.000000   )
 ( -0.000057   0.000000    -0.000033   0.000000    -0.006137   0.000000   )
 (  0.000057   0.000000    -0.000033   0.000000    -0.006137   0.000000   )
 (  0.000000   0.000000     0.000066   0.000000    -0.006137   0.000000   )
 ( -0.000237   0.000000    -0.000137   0.000000    -0.022135   0.000000   )
 (  0.000237   0.000000    -0.000137   0.000000    -0.022135   0.000000   )
 (  0.000000   0.000000     0.000273   0.000000    -0.022135   0.000000   )
 (  0.000287   0.000000     0.000166   0.000000     0.027613   0.000000   )
 ( -0.000287   0.000000     0.000166   0.000000     0.027613   0.000000   )
 (  0.000000   0.000000    -0.000332   0.000000     0.027613   0.000000   )
 (  0.000000   0.000000     0.000000   0.000000     0.000000   0.000000   )
 ( -0.000000   0.000000    -0.000000   0.000000     0.000000   0.000000   )
 (  0.000000   0.000000    -0.000000   0.000000     0.000000   0.000000   )
 (  0.000000   0.000000    -0.000000   0.000000     0.000000   0.000000   )
 (  0.000000   0.000000     0.000000   0.000000     0.000000   0.000000   )
 ( -0.000000   0.000000     0.000000   0.000000     0.000000   0.000000   )
 ( -0.000000   0.000000     0.000000   0.000000    -0.000000   0.000000   )
 ( -0.000000   0.000000    -0.000000   0.000000    -0.000000   0.000000   )
 (  0.000000   0.000000    -0.000000   0.000000    -0.000000   0.000000   )
 (  0.000000   0.000000     0.000000   0.000000     0.000000   0.000000   )
 ( -0.000000   0.000000     0.000000   0.000000     0.000000   0.000000   )
 (  0.000000   0.000000    -0.000000   0.000000     0.000000   0.000000   )
 (  0.000000   0.000000     0.000000   0.000000     0.000000   0.000000   )
 ( -0.000000   0.000000     0.000000   0.000000     0.000000   0.000000   )
 (  0.000000   0.000000    -0.000000   0.000000     0.000000   0.000000   )
 ( -0.000000   0.000000    -0.000000   0.000000    -0.000000   0.000000   )
 (  0.000000   0.000000    -0.000000   0.000000    -0.000000   0.000000   )
 ( -0.000000   0.000000     0.000000   0.000000    -0.000000   0.000000   )
 ( -0.000000   0.000000    -0.000000   0.000000     0.000000   0.000000   )
 (  0.000000   0.000000     0.000000   0.000000     0.000000   0.000000   )
 ( -0.000000   0.000000     0.000000   0.000000     0.000000   0.000000   )
 (  0.000000   0.000000     0.000000   0.000000     0.000000   0.000000   )
 (  0.000000   0.000000    -0.000000   0.000000     0.000000   0.000000   )
 ( -0.000000   0.000000     0.000000   0.000000     0.000000   0.000000   )
 ( -0.000000   0.000000    -0.000000   0.000000     0.000000   0.000000   )
 (  0.000000   0.000000    -0.000000   0.000000     0.000000   0.000000   )
 ( -0.000000   0.000000     0.000000   0.000000     0.000000   0.000000   )
 (  0.000000   0.000000     0.000000   0.000000     0.000000   0.000000   )
 (  0.000000   0.000000    -0.000000   0.000000     0.000000   0.000000   )
 ( -0.000000   0.000000    -0.000000   0.000000     0.000000   0.000000   )
 (  0.000000   0.000000     0.000000   0.000000    -0.000000   0.000000   )
 ( -0.000000   0.000000     0.000000   0.000000    -0.000000   0.000000   )
 (  0.000000   0.000000    -0.000000   0.000000    -0.000000   0.000000   )
 ( -0.000000   0.000000    -0.000000   0.000000    -0.000000   0.000000   )
 ( -0.000000   0.000000     0.000000   0.000000    -0.000000   0.000000   )
 (  0.000000   0.000000     0.000000   0.000000    -0.000000   0.000000   )
 ( -0.000000   0.000000     0.000000   0.000000     0.000000   0.000000   )
 (  0.000000   0.000000    -0.000000   0.000000     0.000000   0.000000   )
 (  0.000000   0.000000     0.000000   0.000000     0.000000   0.000000   )
 ( -0.000000   0.000000     0.000000   0.000000     0.000000   0.000000   )
 (  0.000000   0.000000     0.000000   0.000000     0.000000   0.000000   )
 ( -0.000000   0.000000    -0.000000   0.000000     0.000000   0.000000   )
 (  0.000000   0.000000    -0.000000   0.000000    -0.000000   0.000000   )
 (  0.000000   0.000000     0.000000   0.000000    -0.000000   0.000000   )
 ( -0.000000   0.000000     0.000000   0.000000    -0.000000   0.000000   )
 (  0.000000   0.000000     0.000000   0.000000    -0.000000   0.000000   )
 ( -0.000000   0.000000    -0.000000   0.000000    -0.000000   0.000000   )
 ( -0.000000   0.000000     0.000000   0.000000    -0.000000   0.000000   )
 (  0.000000   0.000000     0.000000   0.000000    -0.000000   0.000000   )
 ( -0.000000   0.000000     0.000000   0.000000    -0.000000   0.000000   )
 (  0.000000   0.000000    -0.000000   0.000000    -0.000000   0.000000   )
 ( -0.000000   0.000000    -0.000000   0.000000    -0.000000   0.000000   )
 ( -0.000000   0.000000     0.000000   0.000000    -0.000000   0.000000   )
 (  0.000000   0.000000     0.000000   0.000000    -0.000000   0.000000   )
 ( -0.000000   0.000000     0.000000   0.000000    -0.000000   0.000000   )
 ( -0.000000   0.000000    -0.000000   0.000000    -0.000000   0.000000   )
 (  0.000000   0.000000     0.000000   0.000000    -0.000000   0.000000   )
 ( -0.000000   0.000000     0.000000   0.000000    -0.000000   0.000000   )
 (  0.000000   0.000000     0.000000   0.000000    -0.000000   0.000000   )
 (  0.000000   0.000000    -0.000000   0.000000    -0.000000   0.000000   )
 ( -0.000000   0.000000     0.000000   0.000000    -0.000000   0.000000   )
 ( -0.000000   0.000000    -0.000000   0.000000    -0.000000   0.000000   )
 (  0.000000   0.000000     0.000000   0.000000    -0.000000   0.000000   )
 ( -0.000000   0.000000     0.000000   0.000000    -0.000000   0.000000   )
 (  0.000000   0.000000     0.000000   0.000000    -0.000000   0.000000   )
 (  0.000000   0.000000    -0.000000   0.000000    -0.000000   0.000000   )
 (  0.000000   0.000000    -0.000000   0.000000     0.000000   0.000000   )
 (  0.000000   0.000000     0.000000   0.000000     0.000000   0.000000   )
 ( -0.000000   0.000000    -0.000000   0.000000     0.000000   0.000000   )
 (  0.000000   0.000000    -0.000000   0.000000     0.000000   0.000000   )
 ( -0.000000   0.000000    -0.000000   0.000000     0.000000   0.000000   )
 ( -0.000000   0.000000     0.000000   0.000000     0.000000   0.000000   )
 ( -0.000000   0.000000    -0.000000   0.000000     0.000687   0.000000   )
 ( -0.000000   0.000000    -0.000000   0.000000     0.000912   0.000000   )
 (  0.000000   0.000000    -0.000000   0.000000    -0.001598   0.000000   )
 (  0.000265   0.000000     0.000153   0.000000     0.097991   0.000000   )
 ( -0.000265   0.000000     0.000153   0.000000     0.097991   0.000000   )
 ( -0.000000   0.000000    -0.000306   0.000000     0.097991   0.000000   )
 (  0.001532   0.000000     0.000884   0.000000     0.355426   0.000000   )
 ( -0.001532   0.000000     0.000884   0.000000     0.355426   0.000000   )
 ( -0.000000   0.000000    -0.001769   0.000000     0.355426   0.000000   )
 ( -0.001766   0.000000    -0.001019   0.000000    -0.442837   0.000000   )
 (  0.001766   0.000000    -0.001019   0.000000    -0.442837   0.000000   )
 ( -0.000000   0.000000     0.002039   0.000000    -0.442837   0.000000   )
     freq (  477) =     109.498499 [THz] =    3652.476758 [cm-1]
 (  0.000000   0.000000    -0.000000   0.000000    -0.000000   0.000000   )
 (  0.000000   0.000000     0.000000   0.000000     0.000000   0.000000   )
 (  0.000000   0.000000    -0.000000   0.000000     0.000000   0.000000   )
 ( -0.000000   0.000000    -0.000000   0.000000     0.000000   0.000000   )
 (  0.000000   0.000000    -0.000000   0.000000     0.000000   0.000000   )
 ( -0.000000   0.000000     0.000000   0.000000     0.000000   0.000000   )
 (  0.000000   0.000000     0.000000   0.000000    -0.000000   0.000000   )
 ( -0.000000   0.000000     0.000000   0.000000    -0.000000   0.000000   )
 ( -0.000000   0.000000    -0.000000   0.000000    -0.000000   0.000000   )
 (  0.000000   0.000000     0.000000   0.000000    -0.000000   0.000000   )
 ( -0.000000   0.000000     0.000000   0.000000    -0.000000   0.000000   )
 (  0.000000   0.000000    -0.000000   0.000000    -0.000000   0.000000   )
 ( -0.000000   0.000000     0.000000   0.000000     0.000000   0.000000   )
 ( -0.000000   0.000000    -0.000000   0.000000     0.000000   0.000000   )
 (  0.000000   0.000000     0.000000   0.000000     0.000000   0.000000   )
 ( -0.000000   0.000000     0.000000   0.000000     0.000000   0.000000   )
 (  0.000000   0.000000     0.000000   0.000000     0.000000   0.000000   )
 (  0.000000   0.000000    -0.000000   0.000000     0.000000   0.000000   )
 (  0.000000   0.000000    -0.000000   0.000000    -0.000000   0.000000   )
 (  0.000000   0.000000     0.000000   0.000000    -0.000000   0.000000   )
 ( -0.000000   0.000000    -0.000000   0.000000    -0.000000   0.000000   )
 (  0.000000   0.000000    -0.000000   0.000000    -0.000000   0.000000   )
 ( -0.000000   0.000000    -0.000000   0.000000    -0.000000   0.000000   )
 ( -0.000000   0.000000     0.000000   0.000000    -0.000000   0.000000   )
 (  0.000000   0.000000    -0.000000   0.000000    -0.000000   0.000000   )
 (  0.000000   0.000000     0.000000   0.000000    -0.000000   0.000000   )
 ( -0.000000   0.000000    -0.000000   0.000000    -0.000000   0.000000   )
 (  0.000000   0.000000    -0.000000   0.000000    -0.000000   0.000000   )
 ( -0.000000   0.000000    -0.000000   0.000000    -0.000000   0.000000   )
 ( -0.000000   0.000000     0.000000   0.000000    -0.000000   0.000000   )
 (  0.000000   0.000000    -0.000000   0.000000     0.000000   0.000000   )
 (  0.000000   0.000000     0.000000   0.000000     0.000000   0.000000   )
 ( -0.000000   0.000000     0.000000   0.000000     0.000000   0.000000   )
 (  0.000000   0.000000     0.000000   0.000000     0.000000   0.000000   )
 ( -0.000000   0.000000    -0.000000   0.000000     0.000000   0.000000   )
 ( -0.000000   0.000000     0.000000   0.000000     0.000000   0.000000   )
 ( -0.000000   0.000000     0.000000   0.000000    -0.000000   0.000000   )
 ( -0.000000   0.000000    -0.000000   0.000000    -0.000000   0.000000   )
 (  0.000000   0.000000    -0.000000   0.000000    -0.000000   0.000000   )
 ( -0.000000   0.000000    -0.000000   0.000000    -0.000000   0.000000   )
 (  0.000000   0.000000     0.000000   0.000000    -0.000000   0.000000   )
 (  0.000000   0.000000    -0.000000   0.000000    -0.000000   0.000000   )
 ( -0.000000   0.000000     0.000000   0.000000    -0.000000   0.000000   )
 ( -0.000000   0.000000    -0.000000   0.000000    -0.000000   0.000000   )
 (  0.000000   0.000000    -0.000000   0.000000    -0.000000   0.000000   )
 ( -0.000000   0.000000    -0.000000   0.000000    -0.000000   0.000000   )
 (  0.000000   0.000000     0.000000   0.000000    -0.000000   0.000000   )
 (  0.000000   0.000000    -0.000000   0.000000    -0.000000   0.000000   )
 ( -0.000000   0.000000    -0.000000   0.000000    -0.000000   0.000000   )
 (  0.000000   0.000000     0.000000   0.000000    -0.000000   0.000000   )
 ( -0.000000   0.000000     0.000000   0.000000    -0.000000   0.000000   )
 ( -0.000000   0.000000    -0.000000   0.000000     0.000000   0.000000   )
 (  0.000000   0.000000     0.000000   0.000000     0.000000   0.000000   )
 ( -0.000000   0.000000     0.000000   0.000000     0.000000   0.000000   )
 (  0.000000   0.000000     0.000000   0.000000    -0.000000   0.000000   )
 ( -0.000000   0.000000    -0.000000   0.000000    -0.000000   0.000000   )
 (  0.000000   0.000000    -0.000000   0.000000    -0.000000   0.000000   )
 ( -0.000000   0.000000     0.000000   0.000000     0.000018   0.000000   )
 ( -0.000000   0.000000     0.000000   0.000000    -0.000036   0.000000   )
 ( -0.000000   0.000000    -0.000000   0.000000     0.000017   0.000000   )
 (  0.000000   0.000000     0.000000   0.000000     0.000000   0.000000   )
 ( -0.000000   0.000000    -0.000000   0.000000     0.000000   0.000000   )
 (  0.000000   0.000000    -0.000000   0.000000     0.000000   0.000000   )
 (  0.000000   0.000000     0.000000   0.000000    -0.000000   0.000000   )
 ( -0.000000   0.000000    -0.000000   0.000000    -0.000000   0.000000   )
 (  0.000000   0.000000    -0.000000   0.000000    -0.000000   0.000000   )
 ( -0.000000   0.000000    -0.000000   0.000000     0.000000   0.000000   )
 (  0.000000   0.000000     0.000000   0.000000     0.000000   0.000000   )
 ( -0.000000   0.000000     0.000000   0.000000     0.000000   0.000000   )
 (  0.000310   0.000000     0.000179   0.000000     0.029312   0.000000   )
 ( -0.000310   0.000000     0.000179   0.000000     0.029312   0.000000   )
 ( -0.000000   0.000000    -0.000357   0.000000     0.029312   0.000000   )
 ( -0.000194   0.000000    -0.000112   0.000000    -0.018880   0.000000   )
 (  0.000194   0.000000    -0.000112   0.000000    -0.018880   0.000000   )
 ( -0.000000   0.000000     0.000224   0.000000    -0.018880   0.000000   )
 ( -0.000098   0.000000    -0.000056   0.000000    -0.008620   0.000000   )
 (  0.000098   0.000000    -0.000056   0.000000    -0.008620   0.000000   )
 ( -0.000000   0.000000     0.000113   0.000000    -0.008620   0.000000   )
 ( -0.000000   0.000000     0.000000   0.000000    -0.000000   0.000000   )
 ( -0.000000   0.000000    -0.000000   0.000000    -0.000000   0.000000   )
 (  0.000000   0.000000    -0.000000   0.000000    -0.000000   0.000000   )
 ( -0.000000   0.000000    -0.000000   0.000000     0.000000   0.000000   )
 (  0.000000   0.000000     0.000000   0.000000     0.000000   0.000000   )
 ( -0.000000   0.000000     0.000000   0.000000     0.000000   0.000000   )
 ( -0.000000   0.000000    -0.000000   0.000000    -0.000000   0.000000   )
 (  0.000000   0.000000     0.000000   0.000000    -0.000000   0.000000   )
 ( -0.000000   0.000000     0.000000   0.000000    -0.000000   0.000000   )
 ( -0.000000   0.000000    -0.000000   0.000000    -0.000000   0.000000   )
 (  0.000000   0.000000    -0.000000   0.000000    -0.000000   0.000000   )
 ( -0.000000   0.000000     0.000000   0.000000    -0.000000   0.000000   )
 (  0.000000   0.000000     0.000000   0.000000     0.000000   0.000000   )
 ( -0.000000   0.000000     0.000000   0.000000     0.000000   0.000000   )
 ( -0.000000   0.000000    -0.000000   0.000000     0.000000   0.000000   )
 (  0.000000   0.000000     0.000000   0.000000     0.000000   0.000000   )
 ( -0.000000   0.000000     0.000000   0.000000     0.000000   0.000000   )
 ( -0.000000   0.000000    -0.000000   0.000000     0.000000   0.000000   )
 (  0.000000   0.000000     0.000000   0.000000    -0.000000   0.000000   )
 ( -0.000000   0.000000     0.000000   0.000000    -0.000000   0.000000   )
 (  0.000000   0.000000    -0.000000   0.000000    -0.000000   0.000000   )
 ( -0.000000   0.000000    -0.000000   0.000000    -0.000000   0.000000   )
 ( -0.000000   0.000000     0.000000   0.000000    -0.000000   0.000000   )
 (  0.000000   0.000000     0.000000   0.000000    -0.000000   0.000000   )
 ( -0.000000   0.000000    -0.000000   0.000000     0.000000   0.000000   )
 (  0.000000   0.000000    -0.000000   0.000000     0.000000   0.000000   )
 ( -0.000000   0.000000     0.000000   0.000000     0.000000   0.000000   )
 (  0.000000   0.000000     0.000000   0.000000     0.000000   0.000000   )
 (  0.000000   0.000000    -0.000000   0.000000     0.000000   0.000000   )
 ( -0.000000   0.000000    -0.000000   0.000000     0.000000   0.000000   )
 ( -0.000000   0.000000     0.000000   0.000000     0.000000   0.000000   )
 (  0.000000   0.000000    -0.000000   0.000000     0.000000   0.000000   )
 (  0.000000   0.000000     0.000000   0.000000     0.000000   0.000000   )
 ( -0.000000   0.000000     0.000000   0.000000     0.000000   0.000000   )
 (  0.000000   0.000000     0.000000   0.000000     0.000000   0.000000   )
 ( -0.000000   0.000000    -0.000000   0.000000     0.000000   0.000000   )
 (  0.000000   0.000000     0.000000   0.000000    -0.000000   0.000000   )
 ( -0.000000   0.000000    -0.000000   0.000000    -0.000000   0.000000   )
 (  0.000000   0.000000    -0.000000   0.000000    -0.000000   0.000000   )
 ( -0.000000   0.000000    -0.000000   0.000000    -0.000000   0.000000   )
 ( -0.000000   0.000000     0.000000   0.000000    -0.000000   0.000000   )
 (  0.000000   0.000000    -0.000000   0.000000    -0.000000   0.000000   )
 ( -0.000000   0.000000    -0.000000   0.000000     0.000000   0.000000   )
 (  0.000000   0.000000    -0.000000   0.000000     0.000000   0.000000   )
 (  0.000000   0.000000     0.000000   0.000000     0.000000   0.000000   )
 ( -0.000000   0.000000     0.000000   0.000000     0.000000   0.000000   )
 (  0.000000   0.000000    -0.000000   0.000000     0.000000   0.000000   )
 ( -0.000000   0.000000    -0.000000   0.000000     0.000000   0.000000   )
 (  0.000000   0.000000    -0.000000   0.000000    -0.000000   0.000000   )
 (  0.000000   0.000000     0.000000   0.000000    -0.000000   0.000000   )
 ( -0.000000   0.000000    -0.000000   0.000000    -0.000000   0.000000   )
 (  0.000000   0.000000    -0.000000   0.000000    -0.000000   0.000000   )
 ( -0.000000   0.000000    -0.000000   0.000000    -0.000000   0.000000   )
 ( -0.000000   0.000000     0.000000   0.000000    -0.000000   0.000000   )
 (  0.000000   0.000000    -0.000000   0.000000     0.000000   0.000000   )
 (  0.000000   0.000000     0.000000   0.000000     0.000000   0.000000   )
 ( -0.000000   0.000000    -0.000000   0.000000     0.000000   0.000000   )
 (  0.000000   0.000000    -0.000000   0.000000     0.000000   0.000000   )
 ( -0.000000   0.000000    -0.000000   0.000000     0.000000   0.000000   )
 ( -0.000000   0.000000     0.000000   0.000000     0.000000   0.000000   )
 ( -0.000000   0.000000     0.000000   0.000000    -0.000000   0.000000   )
 ( -0.000000   0.000000    -0.000000   0.000000    -0.000000   0.000000   )
 (  0.000000   0.000000     0.000000   0.000000    -0.000000   0.000000   )
 ( -0.000000   0.000000     0.000000   0.000000    -0.000000   0.000000   )
 (  0.000000   0.000000     0.000000   0.000000    -0.000000   0.000000   )
 (  0.000000   0.000000    -0.000000   0.000000    -0.000000   0.000000   )
 ( -0.000000   0.000000    -0.000000   0.000000     0.000000   0.000000   )
 (  0.000000   0.000000    -0.000000   0.000000     0.000000   0.000000   )
 (  0.000000   0.000000     0.000000   0.000000     0.000000   0.000000   )
 ( -0.000000   0.000000     0.000000   0.000000     0.000000   0.000000   )
 (  0.000000   0.000000    -0.000000   0.000000     0.000000   0.000000   )
 ( -0.000000   0.000000    -0.000000   0.000000     0.000000   0.000000   )
 (  0.000000   0.000000     0.000000   0.000000    -0.001433   0.000000   )
 (  0.000000   0.000000     0.000000   0.000000     0.001323   0.000000   )
 (  0.000000   0.000000     0.000000   0.000000     0.000088   0.000000   )
 ( -0.001924   0.000000    -0.001111   0.000000    -0.470364   0.000000   )
 (  0.001924   0.000000    -0.001111   0.000000    -0.470364   0.000000   )
 ( -0.000000   0.000000     0.002222   0.000000    -0.470364   0.000000   )
 (  0.001142   0.000000     0.000659   0.000000     0.302556   0.000000   )
 ( -0.001142   0.000000     0.000659   0.000000     0.302556   0.000000   )
 ( -0.000000   0.000000    -0.001319   0.000000     0.302556   0.000000   )
 (  0.000695   0.000000     0.000401   0.000000     0.138753   0.000000   )
 ( -0.000695   0.000000     0.000401   0.000000     0.138753   0.000000   )
 (  0.000000   0.000000    -0.000803   0.000000     0.138753   0.000000   )
     freq (  478) =     109.503009 [THz] =    3652.627207 [cm-1]
 (  0.000000   0.000000    -0.000000   0.000000     0.000000   0.000000   )
 ( -0.000000   0.000000     0.000000   0.000000    -0.000000   0.000000   )
 ( -0.000000   0.000000     0.000000   0.000000     0.000000   0.000000   )
 (  0.000000   0.000000     0.000000   0.000000    -0.000000   0.000000   )
 ( -0.000000   0.000000     0.000000   0.000000    -0.000000   0.000000   )
 ( -0.000000   0.000000     0.000000   0.000000     0.000000   0.000000   )
 ( -0.000000   0.000000    -0.000000   0.000000     0.000000   0.000000   )
 (  0.000000   0.000000    -0.000000   0.000000     0.000000   0.000000   )
 (  0.000000   0.000000    -0.000000   0.000000    -0.000000   0.000000   )
 ( -0.000000   0.000000     0.000000   0.000000     0.000000   0.000000   )
 (  0.000000   0.000000     0.000000   0.000000     0.000000   0.000000   )
 ( -0.000000   0.000000    -0.000000   0.000000    -0.000000   0.000000   )
 (  0.000000   0.000000    -0.000000   0.000000    -0.000000   0.000000   )
 (  0.000000   0.000000     0.000000   0.000000    -0.000000   0.000000   )
 (  0.000000   0.000000     0.000000   0.000000     0.000000   0.000000   )
 ( -0.000000   0.000000     0.000000   0.000000     0.000000   0.000000   )
 ( -0.000000   0.000000    -0.000000   0.000000    -0.000000   0.000000   )
 ( -0.000000   0.000000     0.000000   0.000000    -0.000000   0.000000   )
 ( -0.000000   0.000000     0.000000   0.000000     0.000000   0.000000   )
 (  0.000000   0.000000    -0.000000   0.000000     0.000000   0.000000   )
 ( -0.000000   0.000000     0.000000   0.000000    -0.000000   0.000000   )
 (  0.000000   0.000000     0.000000   0.000000    -0.000000   0.000000   )
 (  0.000000   0.000000     0.000000   0.000000     0.000000   0.000000   )
 ( -0.000000   0.000000    -0.000000   0.000000     0.000000   0.000000   )
 ( -0.000000   0.000000    -0.000000   0.000000     0.000000   0.000000   )
 ( -0.000000   0.000000     0.000000   0.000000    -0.000000   0.000000   )
 ( -0.000000   0.000000     0.000000   0.000000     0.000000   0.000000   )
 (  0.000000   0.000000     0.000000   0.000000     0.000000   0.000000   )
 (  0.000000   0.000000    -0.000000   0.000000     0.000000   0.000000   )
 (  0.000000   0.000000     0.000000   0.000000    -0.000000   0.000000   )
 ( -0.000000   0.000000     0.000000   0.000000    -0.000000   0.000000   )
 ( -0.000000   0.000000    -0.000000   0.000000    -0.000000   0.000000   )
 ( -0.000000   0.000000    -0.000000   0.000000     0.000000   0.000000   )
 (  0.000000   0.000000    -0.000000   0.000000     0.000000   0.000000   )
 (  0.000000   0.000000     0.000000   0.000000    -0.000000   0.000000   )
 (  0.000000   0.000000    -0.000000   0.000000    -0.000000   0.000000   )
 (  0.000000   0.000000    -0.000000   0.000000    -0.000000   0.000000   )
 ( -0.000000   0.000000     0.000000   0.000000     0.000000   0.000000   )
 (  0.000000   0.000000     0.000000   0.000000    -0.000000   0.000000   )
 ( -0.000000   0.000000     0.000000   0.000000    -0.000000   0.000000   )
 ( -0.000000   0.000000    -0.000000   0.000000    -0.000000   0.000000   )
 (  0.000000   0.000000     0.000000   0.000000     0.000000   0.000000   )
 (  0.000000   0.000000     0.000000   0.000000     0.000000   0.000000   )
 (  0.000000   0.000000     0.000000   0.000000     0.000000   0.000000   )
 (  0.000000   0.000000     0.000000   0.000000    -0.000000   0.000000   )
 ( -0.000000   0.000000     0.000000   0.000000    -0.000000   0.000000   )
 ( -0.000000   0.000000     0.000000   0.000000     0.000000   0.000000   )
 ( -0.000000   0.000000     0.000000   0.000000     0.000000   0.000000   )
 ( -0.000000   0.000000     0.000000   0.000000     0.000000   0.000000   )
 ( -0.000000   0.000000     0.000000   0.000000    -0.000000   0.000000   )
 (  0.000000   0.000000     0.000000   0.000000    -0.000000   0.000000   )
 (  0.000000   0.000000    -0.000000   0.000000     0.000000   0.000000   )
 ( -0.000000   0.000000    -0.000000   0.000000    -0.000000   0.000000   )
 (  0.000000   0.000000    -0.000000   0.000000    -0.000000   0.000000   )
 ( -0.000000   0.000000     0.000000   0.000000    -0.000000   0.000000   )
 (  0.000000   0.000000     0.000000   0.000000     0.000000   0.000000   )
 ( -0.000000   0.000000     0.000000   0.000000     0.000000   0.000000   )
 ( -0.000000   0.000000     0.000030   0.000000     0.000000   0.000000   )
 (  0.000000   0.000000    -0.000000   0.000000     0.000000   0.000000   )
 (  0.000000   0.000000    -0.000004   0.000000    -0.000000   0.000000   )
 (  0.000000   0.000000    -0.000000   0.000000    -0.000000   0.000000   )
 (  0.000000   0.000000    -0.000000   0.000000     0.000000   0.000000   )
 ( -0.000000   0.000000    -0.000000   0.000000     0.000000   0.000000   )
 ( -0.000000   0.000000     0.000000   0.000000    -0.000000   0.000000   )
 ( -0.000000   0.000000     0.000000   0.000000     0.000000   0.000000   )
 (  0.000000   0.000000     0.000000   0.000000     0.000000   0.000000   )
 ( -0.000000   0.000000    -0.000000   0.000000     0.000000   0.000000   )
 ( -0.000000   0.000000     0.000000   0.000000    -0.000000   0.000000   )
 (  0.000000   0.000000     0.000000   0.000000    -0.000000   0.000000   )
 ( -0.000242   0.000000    -0.000145   0.000000    -0.024533   0.000000   )
 (  0.000242   0.000000    -0.000145   0.000000    -0.024533   0.000000   )
 (  0.000000   0.000000    -0.000564   0.000000     0.049066   0.000000   )
 (  0.000054   0.000000     0.000050   0.000000     0.006383   0.000000   )
 ( -0.000054   0.000000     0.000050   0.000000     0.006384   0.000000   )
 ( -0.000000   0.000000     0.000143   0.000000    -0.012767   0.000000   )
 (  0.000005   0.000000     0.000021   0.000000     0.001800   0.000000   )
 ( -0.000005   0.000000     0.000021   0.000000     0.001800   0.000000   )
 ( -0.000000   0.000000     0.000031   0.000000    -0.003601   0.000000   )
 ( -0.000000   0.000000    -0.000000   0.000000     0.000000   0.000000   )
 ( -0.000000   0.000000     0.000000   0.000000    -0.000000   0.000000   )
 (  0.000000   0.000000     0.000000   0.000000    -0.000000   0.000000   )
 (  0.000000   0.000000     0.000000   0.000000     0.000000   0.000000   )
 (  0.000000   0.000000    -0.000000   0.000000    -0.000000   0.000000   )
 ( -0.000000   0.000000    -0.000000   0.000000    -0.000000   0.000000   )
 (  0.000000   0.000000    -0.000000   0.000000    -0.000000   0.000000   )
 ( -0.000000   0.000000    -0.000000   0.000000     0.000000   0.000000   )
 (  0.000000   0.000000    -0.000000   0.000000     0.000000   0.000000   )
 (  0.000000   0.000000     0.000000   0.000000     0.000000   0.000000   )
 ( -0.000000   0.000000     0.000000   0.000000     0.000000   0.000000   )
 ( -0.000000   0.000000     0.000000   0.000000    -0.000000   0.000000   )
 ( -0.000000   0.000000     0.000000   0.000000    -0.000000   0.000000   )
 (  0.000000   0.000000     0.000000   0.000000    -0.000000   0.000000   )
 ( -0.000000   0.000000    -0.000000   0.000000     0.000000   0.000000   )
 (  0.000000   0.000000    -0.000000   0.000000    -0.000000   0.000000   )
 ( -0.000000   0.000000    -0.000000   0.000000    -0.000000   0.000000   )
 (  0.000000   0.000000    -0.000000   0.000000     0.000000   0.000000   )
 ( -0.000000   0.000000    -0.000000   0.000000     0.000000   0.000000   )
 (  0.000000   0.000000    -0.000000   0.000000     0.000000   0.000000   )
 (  0.000000   0.000000    -0.000000   0.000000    -0.000000   0.000000   )
 ( -0.000000   0.000000    -0.000000   0.000000    -0.000000   0.000000   )
 (  0.000000   0.000000    -0.000000   0.000000     0.000000   0.000000   )
 ( -0.000000   0.000000    -0.000000   0.000000     0.000000   0.000000   )
 (  0.000000   0.000000    -0.000000   0.000000    -0.000000   0.000000   )
 ( -0.000000   0.000000    -0.000000   0.000000    -0.000000   0.000000   )
 (  0.000000   0.000000     0.000000   0.000000     0.000000   0.000000   )
 ( -0.000000   0.000000     0.000000   0.000000     0.000000   0.000000   )
 ( -0.000000   0.000000    -0.000000   0.000000    -0.000000   0.000000   )
 (  0.000000   0.000000    -0.000000   0.000000    -0.000000   0.000000   )
 ( -0.000000   0.000000     0.000000   0.000000    -0.000000   0.000000   )
 ( -0.000000   0.000000     0.000000   0.000000    -0.000000   0.000000   )
 ( -0.000000   0.000000     0.000000   0.000000     0.000000   0.000000   )
 (  0.000000   0.000000     0.000000   0.000000     0.000000   0.000000   )
 (  0.000000   0.000000     0.000000   0.000000    -0.000000   0.000000   )
 (  0.000000   0.000000     0.000000   0.000000    -0.000000   0.000000   )
 (  0.000000   0.000000    -0.000000   0.000000     0.000000   0.000000   )
 (  0.000000   0.000000     0.000000   0.000000     0.000000   0.000000   )
 (  0.000000   0.000000    -0.000000   0.000000    -0.000000   0.000000   )
 ( -0.000000   0.000000    -0.000000   0.000000    -0.000000   0.000000   )
 ( -0.000000   0.000000    -0.000000   0.000000     0.000000   0.000000   )
 ( -0.000000   0.000000     0.000000   0.000000     0.000000   0.000000   )
 ( -0.000000   0.000000     0.000000   0.000000     0.000000   0.000000   )
 (  0.000000   0.000000     0.000000   0.000000    -0.000000   0.000000   )
 ( -0.000000   0.000000    -0.000000   0.000000    -0.000000   0.000000   )
 (  0.000000   0.000000    -0.000000   0.000000    -0.000000   0.000000   )
 (  0.000000   0.000000     0.000000   0.000000     0.000000   0.000000   )
 ( -0.000000   0.000000     0.000000   0.000000    -0.000000   0.000000   )
 (  0.000000   0.000000    -0.000000   0.000000    -0.000000   0.000000   )
 ( -0.000000   0.000000    -0.000000   0.000000    -0.000000   0.000000   )
 (  0.000000   0.000000     0.000000   0.000000     0.000000   0.000000   )
 ( -0.000000   0.000000     0.000000   0.000000     0.000000   0.000000   )
 ( -0.000000   0.000000    -0.000000   0.000000    -0.000000   0.000000   )
 (  0.000000   0.000000    -0.000000   0.000000    -0.000000   0.000000   )
 ( -0.000000   0.000000     0.000000   0.000000    -0.000000   0.000000   )
 (  0.000000   0.000000    -0.000000   0.000000    -0.000000   0.000000   )
 ( -0.000000   0.000000    -0.000000   0.000000     0.000000   0.000000   )
 (  0.000000   0.000000    -0.000000   0.000000     0.000000   0.000000   )
 (  0.000000   0.000000     0.000000   0.000000    -0.000000   0.000000   )
 ( -0.000000   0.000000    -0.000000   0.000000    -0.000000   0.000000   )
 ( -0.000000   0.000000     0.000000   0.000000    -0.000000   0.000000   )
 (  0.000000   0.000000     0.000000   0.000000     0.000000   0.000000   )
 ( -0.000000   0.000000     0.000000   0.000000     0.000000   0.000000   )
 (  0.000000   0.000000     0.000000   0.000000     0.000000   0.000000   )
 (  0.000000   0.000000     0.000000   0.000000    -0.000000   0.000000   )
 ( -0.000000   0.000000     0.000000   0.000000     0.000000   0.000000   )
 (  0.000000   0.000000    -0.000000   0.000000     0.000000   0.000000   )
 (  0.000000   0.000000    -0.000000   0.000000    -0.000000   0.000000   )
 (  0.000000   0.000000    -0.000000   0.000000    -0.000000   0.000000   )
 ( -0.000000   0.000000    -0.000000   0.000000    -0.000000   0.000000   )
 ( -0.000000   0.000000    -0.000000   0.000000     0.000000   0.000000   )
 ( -0.000000   0.000000    -0.000000   0.000000    -0.000000   0.000000   )
 (  0.000000   0.000000    -0.000807   0.000000    -0.000000   0.000000   )
 ( -0.000000   0.000000     0.000117   0.000000    -0.000000   0.000000   )
 ( -0.000000   0.000000     0.000091   0.000000     0.000000   0.000000   )
 (  0.001450   0.000000     0.001037   0.000000     0.393326   0.000000   )
 ( -0.001450   0.000000     0.001037   0.000000     0.393339   0.000000   )
 ( -0.000000   0.000000     0.003548   0.000000    -0.786666   0.000000   )
 ( -0.000323   0.000000    -0.000309   0.000000    -0.102384   0.000000   )
 (  0.000323   0.000000    -0.000309   0.000000    -0.102388   0.000000   )
 (  0.000000   0.000000    -0.000868   0.000000     0.204772   0.000000   )
 (  0.000028   0.000000    -0.000142   0.000000    -0.028699   0.000000   )
 ( -0.000028   0.000000    -0.000142   0.000000    -0.028700   0.000000   )
 (  0.000000   0.000000    -0.000093   0.000000     0.057399   0.000000   )
     freq (  479) =     109.503009 [THz] =    3652.627207 [cm-1]
 (  0.000000   0.000000     0.000000   0.000000    -0.000000   0.000000   )
 ( -0.000000   0.000000    -0.000000   0.000000     0.000000   0.000000   )
 ( -0.000000   0.000000    -0.000000   0.000000     0.000000   0.000000   )
 ( -0.000000   0.000000    -0.000000   0.000000     0.000000   0.000000   )
 ( -0.000000   0.000000     0.000000   0.000000    -0.000000   0.000000   )
 ( -0.000000   0.000000    -0.000000   0.000000    -0.000000   0.000000   )
 (  0.000000   0.000000     0.000000   0.000000    -0.000000   0.000000   )
 (  0.000000   0.000000    -0.000000   0.000000     0.000000   0.000000   )
 (  0.000000   0.000000     0.000000   0.000000     0.000000   0.000000   )
 (  0.000000   0.000000     0.000000   0.000000    -0.000000   0.000000   )
 (  0.000000   0.000000    -0.000000   0.000000     0.000000   0.000000   )
 ( -0.000000   0.000000     0.000000   0.000000     0.000000   0.000000   )
 ( -0.000000   0.000000     0.000000   0.000000     0.000000   0.000000   )
 (  0.000000   0.000000     0.000000   0.000000    -0.000000   0.000000   )
 (  0.000000   0.000000     0.000000   0.000000     0.000000   0.000000   )
 (  0.000000   0.000000    -0.000000   0.000000    -0.000000   0.000000   )
 ( -0.000000   0.000000    -0.000000   0.000000    -0.000000   0.000000   )
 (  0.000000   0.000000    -0.000000   0.000000     0.000000   0.000000   )
 (  0.000000   0.000000    -0.000000   0.000000    -0.000000   0.000000   )
 ( -0.000000   0.000000    -0.000000   0.000000     0.000000   0.000000   )
 ( -0.000000   0.000000     0.000000   0.000000    -0.000000   0.000000   )
 ( -0.000000   0.000000    -0.000000   0.000000     0.000000   0.000000   )
 (  0.000000   0.000000     0.000000   0.000000     0.000000   0.000000   )
 ( -0.000000   0.000000     0.000000   0.000000    -0.000000   0.000000   )
 ( -0.000000   0.000000    -0.000000   0.000000     0.000000   0.000000   )
 (  0.000000   0.000000    -0.000000   0.000000    -0.000000   0.000000   )
 (  0.000000   0.000000    -0.000000   0.000000    -0.000000   0.000000   )
 (  0.000000   0.000000     0.000000   0.000000     0.000000   0.000000   )
 ( -0.000000   0.000000     0.000000   0.000000    -0.000000   0.000000   )
 (  0.000000   0.000000     0.000000   0.000000     0.000000   0.000000   )
 (  0.000000   0.000000    -0.000000   0.000000     0.000000   0.000000   )
 ( -0.000000   0.000000    -0.000000   0.000000    -0.000000   0.000000   )
 (  0.000000   0.000000     0.000000   0.000000     0.000000   0.000000   )
 (  0.000000   0.000000    -0.000000   0.000000    -0.000000   0.000000   )
 (  0.000000   0.000000     0.000000   0.000000    -0.000000   0.000000   )
 ( -0.000000   0.000000     0.000000   0.000000     0.000000   0.000000   )
 ( -0.000000   0.000000     0.000000   0.000000    -0.000000   0.000000   )
 (  0.000000   0.000000     0.000000   0.000000    -0.000000   0.000000   )
 (  0.000000   0.000000    -0.000000   0.000000     0.000000   0.000000   )
 (  0.000000   0.000000     0.000000   0.000000    -0.000000   0.000000   )
 ( -0.000000   0.000000    -0.000000   0.000000     0.000000   0.000000   )
 (  0.000000   0.000000    -0.000000   0.000000     0.000000   0.000000   )
 ( -0.000000   0.000000     0.000000   0.000000    -0.000000   0.000000   )
 (  0.000000   0.000000     0.000000   0.000000     0.000000   0.000000   )
 ( -0.000000   0.000000     0.000000   0.000000    -0.000000   0.000000   )
 ( -0.000000   0.000000    -0.000000   0.000000     0.000000   0.000000   )
 ( -0.000000   0.000000    -0.000000   0.000000     0.000000   0.000000   )
 (  0.000000   0.000000    -0.000000   0.000000    -0.000000   0.000000   )
 ( -0.000000   0.000000    -0.000000   0.000000    -0.000000   0.000000   )
 ( -0.000000   0.000000     0.000000   0.000000     0.000000   0.000000   )
 ( -0.000000   0.000000    -0.000000   0.000000    -0.000000   0.000000   )
 (  0.000000   0.000000     0.000000   0.000000    -0.000000   0.000000   )
 (  0.000000   0.000000     0.000000   0.000000     0.000000   0.000000   )
 (  0.000000   0.000000    -0.000000   0.000000    -0.000000   0.000000   )
 ( -0.000000   0.000000    -0.000000   0.000000     0.000000   0.000000   )
 ( -0.000000   0.000000    -0.000000   0.000000    -0.000000   0.000000   )
 ( -0.000000   0.000000     0.000000   0.000000     0.000000   0.000000   )
 ( -0.000030   0.000000    -0.000000   0.000000    -0.000000   0.000000   )
 (  0.000000   0.000000     0.000000   0.000000    -0.000000   0.000000   )
 (  0.000004   0.000000     0.000000   0.000000     0.000000   0.000000   )
 (  0.000000   0.000000     0.000000   0.000000     0.000000   0.000000   )
 (  0.000000   0.000000    -0.000000   0.000000    -0.000000   0.000000   )
 (  0.000000   0.000000     0.000000   0.000000     0.000000   0.000000   )
 ( -0.000000   0.000000    -0.000000   0.000000     0.000000   0.000000   )
 ( -0.000000   0.000000     0.000000   0.000000    -0.000000   0.000000   )
 ( -0.000000   0.000000    -0.000000   0.000000     0.000000   0.000000   )
 ( -0.000000   0.000000     0.000000   0.000000    -0.000000   0.000000   )
 (  0.000000   0.000000     0.000000   0.000000     0.000000   0.000000   )
 (  0.000000   0.000000    -0.000000   0.000000    -0.000000   0.000000   )
 (  0.000424   0.000000     0.000242   0.000000     0.042493   0.000000   )
 (  0.000424   0.000000    -0.000242   0.000000    -0.042492   0.000000   )
 (  0.000006   0.000000     0.000000   0.000000    -0.000000   0.000000   )
 ( -0.000112   0.000000    -0.000054   0.000000    -0.011056   0.000000   )
 ( -0.000112   0.000000     0.000054   0.000000     0.011056   0.000000   )
 ( -0.000019   0.000000    -0.000000   0.000000     0.000000   0.000000   )
 ( -0.000028   0.000000    -0.000005   0.000000    -0.003119   0.000000   )
 ( -0.000028   0.000000     0.000005   0.000000     0.003118   0.000000   )
 ( -0.000018   0.000000    -0.000000   0.000000     0.000000   0.000000   )
 ( -0.000000   0.000000     0.000000   0.000000    -0.000000   0.000000   )
 ( -0.000000   0.000000     0.000000   0.000000     0.000000   0.000000   )
 ( -0.000000   0.000000    -0.000000   0.000000    -0.000000   0.000000   )
 (  0.000000   0.000000    -0.000000   0.000000    -0.000000   0.000000   )
 ( -0.000000   0.000000    -0.000000   0.000000     0.000000   0.000000   )
 ( -0.000000   0.000000     0.000000   0.000000    -0.000000   0.000000   )
 (  0.000000   0.000000     0.000000   0.000000     0.000000   0.000000   )
 (  0.000000   0.000000     0.000000   0.000000    -0.000000   0.000000   )
 (  0.000000   0.000000    -0.000000   0.000000     0.000000   0.000000   )
 ( -0.000000   0.000000    -0.000000   0.000000    -0.000000   0.000000   )
 ( -0.000000   0.000000     0.000000   0.000000     0.000000   0.000000   )
 ( -0.000000   0.000000    -0.000000   0.000000     0.000000   0.000000   )
 (  0.000000   0.000000     0.000000   0.000000     0.000000   0.000000   )
 (  0.000000   0.000000    -0.000000   0.000000    -0.000000   0.000000   )
 ( -0.000000   0.000000     0.000000   0.000000    -0.000000   0.000000   )
 (  0.000000   0.000000    -0.000000   0.000000     0.000000   0.000000   )
 (  0.000000   0.000000     0.000000   0.000000    -0.000000   0.000000   )
 (  0.000000   0.000000     0.000000   0.000000    -0.000000   0.000000   )
 (  0.000000   0.000000     0.000000   0.000000    -0.000000   0.000000   )
 (  0.000000   0.000000    -0.000000   0.000000     0.000000   0.000000   )
 ( -0.000000   0.000000    -0.000000   0.000000    -0.000000   0.000000   )
 ( -0.000000   0.000000     0.000000   0.000000     0.000000   0.000000   )
 (  0.000000   0.000000    -0.000000   0.000000     0.000000   0.000000   )
 (  0.000000   0.000000     0.000000   0.000000    -0.000000   0.000000   )
 ( -0.000000   0.000000    -0.000000   0.000000     0.000000   0.000000   )
 ( -0.000000   0.000000     0.000000   0.000000    -0.000000   0.000000   )
 (  0.000000   0.000000    -0.000000   0.000000    -0.000000   0.000000   )
 (  0.000000   0.000000     0.000000   0.000000     0.000000   0.000000   )
 ( -0.000000   0.000000     0.000000   0.000000    -0.000000   0.000000   )
 ( -0.000000   0.000000    -0.000000   0.000000     0.000000   0.000000   )
 ( -0.000000   0.000000    -0.000000   0.000000     0.000000   0.000000   )
 ( -0.000000   0.000000     0.000000   0.000000    -0.000000   0.000000   )
 (  0.000000   0.000000    -0.000000   0.000000     0.000000   0.000000   )
 (  0.000000   0.000000     0.000000   0.000000    -0.000000   0.000000   )
 ( -0.000000   0.000000     0.000000   0.000000    -0.000000   0.000000   )
 ( -0.000000   0.000000    -0.000000   0.000000     0.000000   0.000000   )
 ( -0.000000   0.000000     0.000000   0.000000    -0.000000   0.000000   )
 (  0.000000   0.000000     0.000000   0.000000     0.000000   0.000000   )
 (  0.000000   0.000000    -0.000000   0.000000     0.000000   0.000000   )
 (  0.000000   0.000000     0.000000   0.000000    -0.000000   0.000000   )
 ( -0.000000   0.000000    -0.000000   0.000000     0.000000   0.000000   )
 (  0.000000   0.000000    -0.000000   0.000000    -0.000000   0.000000   )
 (  0.000000   0.000000    -0.000000   0.000000     0.000000   0.000000   )
 ( -0.000000   0.000000    -0.000000   0.000000     0.000000   0.000000   )
 ( -0.000000   0.000000    -0.000000   0.000000    -0.000000   0.000000   )
 ( -0.000000   0.000000     0.000000   0.000000     0.000000   0.000000   )
 (  0.000000   0.000000     0.000000   0.000000    -0.000000   0.000000   )
 ( -0.000000   0.000000     0.000000   0.000000    -0.000000   0.000000   )
 ( -0.000000   0.000000    -0.000000   0.000000     0.000000   0.000000   )
 ( -0.000000   0.000000     0.000000   0.000000    -0.000000   0.000000   )
 (  0.000000   0.000000     0.000000   0.000000    -0.000000   0.000000   )
 (  0.000000   0.000000    -0.000000   0.000000     0.000000   0.000000   )
 ( -0.000000   0.000000     0.000000   0.000000    -0.000000   0.000000   )
 ( -0.000000   0.000000    -0.000000   0.000000     0.000000   0.000000   )
 (  0.000000   0.000000    -0.000000   0.000000     0.000000   0.000000   )
 ( -0.000000   0.000000    -0.000000   0.000000    -0.000000   0.000000   )
 (  0.000000   0.000000     0.000000   0.000000    -0.000000   0.000000   )
 (  0.000000   0.000000    -0.000000   0.000000     0.000000   0.000000   )
 (  0.000000   0.000000     0.000000   0.000000    -0.000000   0.000000   )
 ( -0.000000   0.000000     0.000000   0.000000     0.000000   0.000000   )
 ( -0.000000   0.000000     0.000000   0.000000    -0.000000   0.000000   )
 ( -0.000000   0.000000    -0.000000   0.000000    -0.000000   0.000000   )
 ( -0.000000   0.000000    -0.000000   0.000000     0.000000   0.000000   )
 ( -0.000000   0.000000     0.000000   0.000000    -0.000000   0.000000   )
 ( -0.000000   0.000000    -0.000000   0.000000     0.000000   0.000000   )
 ( -0.000000   0.000000     0.000000   0.000000     0.000000   0.000000   )
 (  0.000000   0.000000     0.000000   0.000000    -0.000000   0.000000   )
 (  0.000000   0.000000     0.000000   0.000000     0.000000   0.000000   )
 (  0.000000   0.000000     0.000000   0.000000    -0.000000   0.000000   )
 (  0.000000   0.000000    -0.000000   0.000000     0.000000   0.000000   )
 (  0.000000   0.000000    -0.000000   0.000000     0.000000   0.000000   )
 (  0.000000   0.000000    -0.000000   0.000000    -0.000000   0.000000   )
 (  0.000807   0.000000     0.000000   0.000000     0.000000   0.000000   )
 ( -0.000117   0.000000    -0.000000   0.000000     0.000000   0.000000   )
 ( -0.000091   0.000000    -0.000000   0.000000    -0.000000   0.000000   )
 ( -0.002711   0.000000    -0.001450   0.000000    -0.681276   0.000000   )
 ( -0.002711   0.000000     0.001450   0.000000     0.681269   0.000000   )
 ( -0.000199   0.000000    -0.000000   0.000000     0.000008   0.000000   )
 (  0.000682   0.000000     0.000323   0.000000     0.177339   0.000000   )
 (  0.000682   0.000000    -0.000323   0.000000    -0.177337   0.000000   )
 (  0.000123   0.000000     0.000000   0.000000    -0.000002   0.000000   )
 (  0.000110   0.000000    -0.000028   0.000000     0.049709   0.000000   )
 (  0.000110   0.000000     0.000028   0.000000    -0.049709   0.000000   )
 (  0.000159   0.000000     0.000000   0.000000    -0.000001   0.000000   )
     freq (  480) =     109.510831 [THz] =    3652.888127 [cm-1]
 (  0.000000   0.000000     0.000000   0.000000    -0.000000   0.000000   )
 (  0.000000   0.000000     0.000000   0.000000     0.000000   0.000000   )
 ( -0.000000   0.000000    -0.000000   0.000000     0.000000   0.000000   )
 ( -0.000000   0.000000    -0.000000   0.000000     0.000000   0.000000   )
 ( -0.000000   0.000000     0.000000   0.000000    -0.000000   0.000000   )
 ( -0.000000   0.000000    -0.000000   0.000000    -0.000000   0.000000   )
 ( -0.000000   0.000000    -0.000000   0.000000     0.000000   0.000000   )
 ( -0.000000   0.000000     0.000000   0.000000    -0.000000   0.000000   )
 ( -0.000000   0.000000    -0.000000   0.000000    -0.000000   0.000000   )
 (  0.000000   0.000000     0.000000   0.000000    -0.000000   0.000000   )
 (  0.000000   0.000000    -0.000000   0.000000     0.000000   0.000000   )
 (  0.000000   0.000000     0.000000   0.000000     0.000000   0.000000   )
 ( -0.000000   0.000000     0.000000   0.000000     0.000000   0.000000   )
 (  0.000000   0.000000     0.000000   0.000000    -0.000000   0.000000   )
 (  0.000000   0.000000    -0.000000   0.000000    -0.000000   0.000000   )
 (  0.000000   0.000000     0.000000   0.000000     0.000000   0.000000   )
 ( -0.000000   0.000000    -0.000000   0.000000    -0.000000   0.000000   )
 (  0.000000   0.000000    -0.000000   0.000000     0.000000   0.000000   )
 ( -0.000000   0.000000     0.000000   0.000000     0.000000   0.000000   )
 (  0.000000   0.000000     0.000000   0.000000    -0.000000   0.000000   )
 ( -0.000000   0.000000     0.000000   0.000000     0.000000   0.000000   )
 ( -0.000000   0.000000    -0.000000   0.000000    -0.000000   0.000000   )
 ( -0.000000   0.000000    -0.000000   0.000000    -0.000000   0.000000   )
 (  0.000000   0.000000    -0.000000   0.000000     0.000000   0.000000   )
 (  0.000000   0.000000    -0.000000   0.000000    -0.000000   0.000000   )
 ( -0.000000   0.000000    -0.000000   0.000000     0.000000   0.000000   )
 ( -0.000000   0.000000     0.000000   0.000000    -0.000000   0.000000   )
 ( -0.000000   0.000000    -0.000000   0.000000     0.000000   0.000000   )
 (  0.000000   0.000000     0.000000   0.000000     0.000000   0.000000   )
 ( -0.000000   0.000000     0.000000   0.000000    -0.000000   0.000000   )
 (  0.000000   0.000000    -0.000000   0.000000     0.000000   0.000000   )
 ( -0.000000   0.000000    -0.000000   0.000000    -0.000000   0.000000   )
 ( -0.000000   0.000000     0.000000   0.000000    -0.000000   0.000000   )
 ( -0.000000   0.000000    -0.000000   0.000000     0.000000   0.000000   )
 (  0.000000   0.000000     0.000000   0.000000    -0.000000   0.000000   )
 ( -0.000000   0.000000     0.000000   0.000000     0.000000   0.000000   )
 (  0.000000   0.000000    -0.000000   0.000000     0.000000   0.000000   )
 ( -0.000000   0.000000    -0.000000   0.000000    -0.000000   0.000000   )
 (  0.000000   0.000000     0.000000   0.000000     0.000000   0.000000   )
 (  0.000000   0.000000    -0.000000   0.000000    -0.000000   0.000000   )
 (  0.000000   0.000000     0.000000   0.000000    -0.000000   0.000000   )
 ( -0.000000   0.000000     0.000000   0.000000     0.000000   0.000000   )
 ( -0.000000   0.000000     0.000000   0.000000    -0.000000   0.000000   )
 (  0.000000   0.000000     0.000000   0.000000    -0.000000   0.000000   )
 (  0.000000   0.000000    -0.000000   0.000000     0.000000   0.000000   )
 (  0.000000   0.000000     0.000000   0.000000    -0.000000   0.000000   )
 ( -0.000000   0.000000    -0.000000   0.000000     0.000000   0.000000   )
 (  0.000000   0.000000    -0.000000   0.000000     0.000000   0.000000   )
 ( -0.000000   0.000000    -0.000000   0.000000     0.000000   0.000000   )
 ( -0.000000   0.000000     0.000000   0.000000    -0.000000   0.000000   )
 ( -0.000000   0.000000    -0.000000   0.000000     0.000000   0.000000   )
 ( -0.000000   0.000000     0.000000   0.000000    -0.000000   0.000000   )
 ( -0.000000   0.000000     0.000000   0.000000     0.000000   0.000000   )
 ( -0.000000   0.000000    -0.000000   0.000000    -0.000000   0.000000   )
 (  0.000000   0.000000     0.000000   0.000000    -0.000000   0.000000   )
 (  0.000000   0.000000     0.000000   0.000000     0.000000   0.000000   )
 (  0.000000   0.000000    -0.000000   0.000000    -0.000000   0.000000   )
 ( -0.000006   0.000000    -0.000000   0.000000    -0.000000   0.000000   )
 ( -0.000036   0.000000    -0.000000   0.000000     0.000000   0.000000   )
 (  0.000005   0.000000     0.000000   0.000000    -0.000000   0.000000   )
 (  0.000000   0.000000     0.000000   0.000000     0.000000   0.000000   )
 (  0.000000   0.000000    -0.000000   0.000000    -0.000000   0.000000   )
 (  0.000000   0.000000     0.000000   0.000000     0.000000   0.000000   )
 (  0.000000   0.000000    -0.000000   0.000000     0.000000   0.000000   )
 (  0.000000   0.000000    -0.000000   0.000000    -0.000000   0.000000   )
 (  0.000000   0.000000     0.000000   0.000000     0.000000   0.000000   )
 ( -0.000000   0.000000    -0.000000   0.000000     0.000000   0.000000   )
 ( -0.000000   0.000000     0.000000   0.000000    -0.000000   0.000000   )
 ( -0.000000   0.000000    -0.000000   0.000000     0.000000   0.000000   )
 (  0.000102   0.000000     0.000071   0.000000     0.009943   0.000000   )
 (  0.000102   0.000000    -0.000071   0.000000    -0.009943   0.000000   )
 ( -0.000021   0.000000     0.000000   0.000000    -0.000000   0.000000   )
 (  0.000409   0.000000     0.000233   0.000000     0.041410   0.000000   )
 (  0.000409   0.000000    -0.000233   0.000000    -0.041410   0.000000   )
 (  0.000005   0.000000     0.000000   0.000000    -0.000000   0.000000   )
 ( -0.000111   0.000000    -0.000052   0.000000    -0.011149   0.000000   )
 ( -0.000111   0.000000     0.000052   0.000000     0.011149   0.000000   )
 ( -0.000021   0.000000    -0.000000   0.000000     0.000000   0.000000   )
 ( -0.000000   0.000000     0.000000   0.000000     0.000000   0.000000   )
 (  0.000000   0.000000     0.000000   0.000000    -0.000000   0.000000   )
 (  0.000000   0.000000    -0.000000   0.000000     0.000000   0.000000   )
 ( -0.000000   0.000000     0.000000   0.000000    -0.000000   0.000000   )
 ( -0.000000   0.000000     0.000000   0.000000     0.000000   0.000000   )
 ( -0.000000   0.000000    -0.000000   0.000000    -0.000000   0.000000   )
 (  0.000000   0.000000    -0.000000   0.000000    -0.000000   0.000000   )
 ( -0.000000   0.000000    -0.000000   0.000000     0.000000   0.000000   )
 ( -0.000000   0.000000     0.000000   0.000000    -0.000000   0.000000   )
 ( -0.000000   0.000000    -0.000000   0.000000    -0.000000   0.000000   )
 ( -0.000000   0.000000     0.000000   0.000000     0.000000   0.000000   )
 (  0.000000   0.000000    -0.000000   0.000000     0.000000   0.000000   )
 ( -0.000000   0.000000    -0.000000   0.000000    -0.000000   0.000000   )
 ( -0.000000   0.000000     0.000000   0.000000     0.000000   0.000000   )
 ( -0.000000   0.000000    -0.000000   0.000000     0.000000   0.000000   )
 (  0.000000   0.000000     0.000000   0.000000     0.000000   0.000000   )
 (  0.000000   0.000000    -0.000000   0.000000    -0.000000   0.000000   )
 ( -0.000000   0.000000     0.000000   0.000000    -0.000000   0.000000   )
 (  0.000000   0.000000     0.000000   0.000000    -0.000000   0.000000   )
 (  0.000000   0.000000    -0.000000   0.000000     0.000000   0.000000   )
 ( -0.000000   0.000000    -0.000000   0.000000    -0.000000   0.000000   )
 ( -0.000000   0.000000     0.000000   0.000000     0.000000   0.000000   )
 (  0.000000   0.000000    -0.000000   0.000000     0.000000   0.000000   )
 (  0.000000   0.000000     0.000000   0.000000    -0.000000   0.000000   )
 (  0.000000   0.000000     0.000000   0.000000    -0.000000   0.000000   )
 (  0.000000   0.000000    -0.000000   0.000000     0.000000   0.000000   )
 ( -0.000000   0.000000    -0.000000   0.000000    -0.000000   0.000000   )
 ( -0.000000   0.000000     0.000000   0.000000     0.000000   0.000000   )
 (  0.000000   0.000000    -0.000000   0.000000     0.000000   0.000000   )
 (  0.000000   0.000000     0.000000   0.000000    -0.000000   0.000000   )
 ( -0.000000   0.000000    -0.000000   0.000000     0.000000   0.000000   )
 ( -0.000000   0.000000     0.000000   0.000000    -0.000000   0.000000   )
 (  0.000000   0.000000    -0.000000   0.000000    -0.000000   0.000000   )
 (  0.000000   0.000000     0.000000   0.000000     0.000000   0.000000   )
 ( -0.000000   0.000000     0.000000   0.000000    -0.000000   0.000000   )
 ( -0.000000   0.000000    -0.000000   0.000000     0.000000   0.000000   )
 ( -0.000000   0.000000     0.000000   0.000000     0.000000   0.000000   )
 (  0.000000   0.000000     0.000000   0.000000    -0.000000   0.000000   )
 (  0.000000   0.000000     0.000000   0.000000    -0.000000   0.000000   )
 (  0.000000   0.000000    -0.000000   0.000000     0.000000   0.000000   )
 ( -0.000000   0.000000    -0.000000   0.000000    -0.000000   0.000000   )
 (  0.000000   0.000000    -0.000000   0.000000     0.000000   0.000000   )
 ( -0.000000   0.000000     0.000000   0.000000    -0.000000   0.000000   )
 (  0.000000   0.000000     0.000000   0.000000     0.000000   0.000000   )
 ( -0.000000   0.000000    -0.000000   0.000000    -0.000000   0.000000   )
 ( -0.000000   0.000000     0.000000   0.000000     0.000000   0.000000   )
 ( -0.000000   0.000000    -0.000000   0.000000     0.000000   0.000000   )
 (  0.000000   0.000000    -0.000000   0.000000    -0.000000   0.000000   )
 (  0.000000   0.000000    -0.000000   0.000000     0.000000   0.000000   )
 ( -0.000000   0.000000    -0.000000   0.000000     0.000000   0.000000   )
 ( -0.000000   0.000000    -0.000000   0.000000    -0.000000   0.000000   )
 ( -0.000000   0.000000     0.000000   0.000000     0.000000   0.000000   )
 (  0.000000   0.000000     0.000000   0.000000    -0.000000   0.000000   )
 ( -0.000000   0.000000     0.000000   0.000000    -0.000000   0.000000   )
 (  0.000000   0.000000    -0.000000   0.000000    -0.000000   0.000000   )
 (  0.000000   0.000000    -0.000000   0.000000     0.000000   0.000000   )
 (  0.000000   0.000000     0.000000   0.000000    -0.000000   0.000000   )
 (  0.000000   0.000000    -0.000000   0.000000     0.000000   0.000000   )
 (  0.000000   0.000000     0.000000   0.000000     0.000000   0.000000   )
 (  0.000000   0.000000     0.000000   0.000000    -0.000000   0.000000   )
 (  0.000000   0.000000    -0.000000   0.000000     0.000000   0.000000   )
 ( -0.000000   0.000000    -0.000000   0.000000    -0.000000   0.000000   )
 ( -0.000000   0.000000     0.000000   0.000000     0.000000   0.000000   )
 ( -0.000000   0.000000    -0.000000   0.000000    -0.000000   0.000000   )
 (  0.000000   0.000000     0.000000   0.000000    -0.000000   0.000000   )
 ( -0.000000   0.000000     0.000000   0.000000     0.000000   0.000000   )
 ( -0.000000   0.000000     0.000000   0.000000    -0.000000   0.000000   )
 ( -0.000000   0.000000    -0.000000   0.000000    -0.000000   0.000000   )
 ( -0.000000   0.000000    -0.000000   0.000000     0.000000   0.000000   )
 ( -0.000000   0.000000     0.000000   0.000000    -0.000000   0.000000   )
 ( -0.000000   0.000000    -0.000000   0.000000     0.000000   0.000000   )
 ( -0.000000   0.000000     0.000000   0.000000     0.000000   0.000000   )
 (  0.000158   0.000000     0.000000   0.000000     0.000000   0.000000   )
 (  0.000807   0.000000     0.000000   0.000000    -0.000000   0.000000   )
 ( -0.000116   0.000000    -0.000000   0.000000    -0.000000   0.000000   )
 ( -0.000714   0.000000    -0.000478   0.000000    -0.159744   0.000000   )
 ( -0.000714   0.000000     0.000478   0.000000     0.159744   0.000000   )
 (  0.000115   0.000000    -0.000000   0.000000     0.000000   0.000000   )
 ( -0.002440   0.000000    -0.001415   0.000000    -0.663753   0.000000   )
 ( -0.002440   0.000000     0.001415   0.000000     0.663752   0.000000   )
 (  0.000011   0.000000    -0.000000   0.000000     0.000002   0.000000   )
 (  0.000677   0.000000     0.000273   0.000000     0.178792   0.000000   )
 (  0.000677   0.000000    -0.000273   0.000000    -0.178792   0.000000   )
 (  0.000204   0.000000     0.000000   0.000000    -0.000000   0.000000   )
     freq (  481) =     109.510831 [THz] =    3652.888127 [cm-1]
 (  0.000000   0.000000    -0.000000   0.000000    -0.000000   0.000000   )
 (  0.000000   0.000000    -0.000000   0.000000     0.000000   0.000000   )
 ( -0.000000   0.000000     0.000000   0.000000     0.000000   0.000000   )
 (  0.000000   0.000000     0.000000   0.000000    -0.000000   0.000000   )
 ( -0.000000   0.000000     0.000000   0.000000    -0.000000   0.000000   )
 ( -0.000000   0.000000     0.000000   0.000000     0.000000   0.000000   )
 (  0.000000   0.000000     0.000000   0.000000    -0.000000   0.000000   )
 ( -0.000000   0.000000     0.000000   0.000000    -0.000000   0.000000   )
 ( -0.000000   0.000000     0.000000   0.000000     0.000000   0.000000   )
 ( -0.000000   0.000000    -0.000000   0.000000     0.000000   0.000000   )
 (  0.000000   0.000000    -0.000000   0.000000     0.000000   0.000000   )
 (  0.000000   0.000000    -0.000000   0.000000    -0.000000   0.000000   )
 (  0.000000   0.000000    -0.000000   0.000000    -0.000000   0.000000   )
 ( -0.000000   0.000000     0.000000   0.000000    -0.000000   0.000000   )
 (  0.000000   0.000000     0.000000   0.000000     0.000000   0.000000   )
 ( -0.000000   0.000000     0.000000   0.000000     0.000000   0.000000   )
 ( -0.000000   0.000000    -0.000000   0.000000    -0.000000   0.000000   )
 (  0.000000   0.000000     0.000000   0.000000    -0.000000   0.000000   )
 (  0.000000   0.000000    -0.000000   0.000000    -0.000000   0.000000   )
 (  0.000000   0.000000     0.000000   0.000000    -0.000000   0.000000   )
 (  0.000000   0.000000     0.000000   0.000000     0.000000   0.000000   )
 ( -0.000000   0.000000     0.000000   0.000000     0.000000   0.000000   )
 ( -0.000000   0.000000    -0.000000   0.000000    -0.000000   0.000000   )
 ( -0.000000   0.000000     0.000000   0.000000    -0.000000   0.000000   )
 ( -0.000000   0.000000     0.000000   0.000000     0.000000   0.000000   )
 (  0.000000   0.000000    -0.000000   0.000000    -0.000000   0.000000   )
 ( -0.000000   0.000000     0.000000   0.000000    -0.000000   0.000000   )
 (  0.000000   0.000000     0.000000   0.000000    -0.000000   0.000000   )
 (  0.000000   0.000000     0.000000   0.000000     0.000000   0.000000   )
 ( -0.000000   0.000000    -0.000000   0.000000    -0.000000   0.000000   )
 ( -0.000000   0.000000     0.000000   0.000000    -0.000000   0.000000   )
 (  0.000000   0.000000    -0.000000   0.000000    -0.000000   0.000000   )
 ( -0.000000   0.000000    -0.000000   0.000000     0.000000   0.000000   )
 (  0.000000   0.000000    -0.000000   0.000000     0.000000   0.000000   )
 (  0.000000   0.000000     0.000000   0.000000    -0.000000   0.000000   )
 ( -0.000000   0.000000    -0.000000   0.000000    -0.000000   0.000000   )
 ( -0.000000   0.000000     0.000000   0.000000    -0.000000   0.000000   )
 ( -0.000000   0.000000    -0.000000   0.000000    -0.000000   0.000000   )
 ( -0.000000   0.000000    -0.000000   0.000000     0.000000   0.000000   )
 (  0.000000   0.000000    -0.000000   0.000000     0.000000   0.000000   )
 (  0.000000   0.000000     0.000000   0.000000    -0.000000   0.000000   )
 (  0.000000   0.000000    -0.000000   0.000000    -0.000000   0.000000   )
 (  0.000000   0.000000    -0.000000   0.000000    -0.000000   0.000000   )
 ( -0.000000   0.000000     0.000000   0.000000     0.000000   0.000000   )
 (  0.000000   0.000000     0.000000   0.000000    -0.000000   0.000000   )
 ( -0.000000   0.000000     0.000000   0.000000    -0.000000   0.000000   )
 ( -0.000000   0.000000    -0.000000   0.000000    -0.000000   0.000000   )
 (  0.000000   0.000000     0.000000   0.000000     0.000000   0.000000   )
 ( -0.000000   0.000000     0.000000   0.000000    -0.000000   0.000000   )
 ( -0.000000   0.000000     0.000000   0.000000     0.000000   0.000000   )
 (  0.000000   0.000000     0.000000   0.000000     0.000000   0.000000   )
 ( -0.000000   0.000000    -0.000000   0.000000     0.000000   0.000000   )
 ( -0.000000   0.000000     0.000000   0.000000    -0.000000   0.000000   )
 (  0.000000   0.000000     0.000000   0.000000    -0.000000   0.000000   )
 (  0.000000   0.000000    -0.000000   0.000000     0.000000   0.000000   )
 ( -0.000000   0.000000    -0.000000   0.000000    -0.000000   0.000000   )
 (  0.000000   0.000000    -0.000000   0.000000    -0.000000   0.000000   )
 ( -0.000000   0.000000     0.000006   0.000000     0.000000   0.000000   )
 ( -0.000000   0.000000     0.000036   0.000000     0.000000   0.000000   )
 (  0.000000   0.000000    -0.000005   0.000000    -0.000000   0.000000   )
 (  0.000000   0.000000    -0.000000   0.000000    -0.000000   0.000000   )
 (  0.000000   0.000000    -0.000000   0.000000     0.000000   0.000000   )
 ( -0.000000   0.000000    -0.000000   0.000000     0.000000   0.000000   )
 (  0.000000   0.000000     0.000000   0.000000    -0.000000   0.000000   )
 (  0.000000   0.000000    -0.000000   0.000000     0.000000   0.000000   )
 ( -0.000000   0.000000    -0.000000   0.000000     0.000000   0.000000   )
 ( -0.000000   0.000000     0.000000   0.000000    -0.000000   0.000000   )
 ( -0.000000   0.000000     0.000000   0.000000     0.000000   0.000000   )
 (  0.000000   0.000000     0.000000   0.000000     0.000000   0.000000   )
 ( -0.000071   0.000000    -0.000020   0.000000    -0.005741   0.000000   )
 (  0.000071   0.000000    -0.000020   0.000000    -0.005741   0.000000   )
 ( -0.000000   0.000000    -0.000143   0.000000     0.011481   0.000000   )
 ( -0.000233   0.000000    -0.000140   0.000000    -0.023908   0.000000   )
 (  0.000233   0.000000    -0.000140   0.000000    -0.023908   0.000000   )
 (  0.000000   0.000000    -0.000543   0.000000     0.047816   0.000000   )
 (  0.000052   0.000000     0.000051   0.000000     0.006437   0.000000   )
 ( -0.000052   0.000000     0.000051   0.000000     0.006437   0.000000   )
 ( -0.000000   0.000000     0.000141   0.000000    -0.012873   0.000000   )
 ( -0.000000   0.000000    -0.000000   0.000000    -0.000000   0.000000   )
 ( -0.000000   0.000000     0.000000   0.000000     0.000000   0.000000   )
 (  0.000000   0.000000     0.000000   0.000000     0.000000   0.000000   )
 ( -0.000000   0.000000    -0.000000   0.000000     0.000000   0.000000   )
 ( -0.000000   0.000000     0.000000   0.000000    -0.000000   0.000000   )
 (  0.000000   0.000000     0.000000   0.000000    -0.000000   0.000000   )
 (  0.000000   0.000000     0.000000   0.000000     0.000000   0.000000   )
 (  0.000000   0.000000    -0.000000   0.000000    -0.000000   0.000000   )
 ( -0.000000   0.000000    -0.000000   0.000000    -0.000000   0.000000   )
 (  0.000000   0.000000     0.000000   0.000000     0.000000   0.000000   )
 ( -0.000000   0.000000     0.000000   0.000000     0.000000   0.000000   )
 (  0.000000   0.000000     0.000000   0.000000    -0.000000   0.000000   )
 (  0.000000   0.000000     0.000000   0.000000     0.000000   0.000000   )
 ( -0.000000   0.000000     0.000000   0.000000     0.000000   0.000000   )
 ( -0.000000   0.000000     0.000000   0.000000    -0.000000   0.000000   )
 ( -0.000000   0.000000     0.000000   0.000000    -0.000000   0.000000   )
 (  0.000000   0.000000     0.000000   0.000000    -0.000000   0.000000   )
 ( -0.000000   0.000000    -0.000000   0.000000     0.000000   0.000000   )
 ( -0.000000   0.000000    -0.000000   0.000000     0.000000   0.000000   )
 ( -0.000000   0.000000     0.000000   0.000000     0.000000   0.000000   )
 (  0.000000   0.000000    -0.000000   0.000000    -0.000000   0.000000   )
 ( -0.000000   0.000000    -0.000000   0.000000    -0.000000   0.000000   )
 (  0.000000   0.000000    -0.000000   0.000000     0.000000   0.000000   )
 (  0.000000   0.000000     0.000000   0.000000     0.000000   0.000000   )
 ( -0.000000   0.000000    -0.000000   0.000000     0.000000   0.000000   )
 (  0.000000   0.000000    -0.000000   0.000000     0.000000   0.000000   )
 (  0.000000   0.000000    -0.000000   0.000000    -0.000000   0.000000   )
 ( -0.000000   0.000000    -0.000000   0.000000    -0.000000   0.000000   )
 (  0.000000   0.000000    -0.000000   0.000000     0.000000   0.000000   )
 ( -0.000000   0.000000    -0.000000   0.000000     0.000000   0.000000   )
 (  0.000000   0.000000    -0.000000   0.000000    -0.000000   0.000000   )
 ( -0.000000   0.000000    -0.000000   0.000000    -0.000000   0.000000   )
 (  0.000000   0.000000     0.000000   0.000000     0.000000   0.000000   )
 ( -0.000000   0.000000     0.000000   0.000000     0.000000   0.000000   )
 ( -0.000000   0.000000    -0.000000   0.000000    -0.000000   0.000000   )
 (  0.000000   0.000000    -0.000000   0.000000    -0.000000   0.000000   )
 (  0.000000   0.000000    -0.000000   0.000000    -0.000000   0.000000   )
 ( -0.000000   0.000000    -0.000000   0.000000    -0.000000   0.000000   )
 (  0.000000   0.000000    -0.000000   0.000000     0.000000   0.000000   )
 ( -0.000000   0.000000    -0.000000   0.000000     0.000000   0.000000   )
 ( -0.000000   0.000000    -0.000000   0.000000    -0.000000   0.000000   )
 (  0.000000   0.000000    -0.000000   0.000000    -0.000000   0.000000   )
 ( -0.000000   0.000000    -0.000000   0.000000     0.000000   0.000000   )
 (  0.000000   0.000000     0.000000   0.000000     0.000000   0.000000   )
 (  0.000000   0.000000    -0.000000   0.000000    -0.000000   0.000000   )
 ( -0.000000   0.000000    -0.000000   0.000000    -0.000000   0.000000   )
 (  0.000000   0.000000    -0.000000   0.000000     0.000000   0.000000   )
 ( -0.000000   0.000000     0.000000   0.000000     0.000000   0.000000   )
 ( -0.000000   0.000000     0.000000   0.000000     0.000000   0.000000   )
 ( -0.000000   0.000000     0.000000   0.000000    -0.000000   0.000000   )
 ( -0.000000   0.000000    -0.000000   0.000000    -0.000000   0.000000   )
 (  0.000000   0.000000    -0.000000   0.000000    -0.000000   0.000000   )
 (  0.000000   0.000000     0.000000   0.000000     0.000000   0.000000   )
 (  0.000000   0.000000     0.000000   0.000000    -0.000000   0.000000   )
 (  0.000000   0.000000    -0.000000   0.000000     0.000000   0.000000   )
 (  0.000000   0.000000    -0.000000   0.000000    -0.000000   0.000000   )
 ( -0.000000   0.000000    -0.000000   0.000000    -0.000000   0.000000   )
 (  0.000000   0.000000    -0.000000   0.000000    -0.000000   0.000000   )
 ( -0.000000   0.000000    -0.000000   0.000000     0.000000   0.000000   )
 ( -0.000000   0.000000    -0.000000   0.000000    -0.000000   0.000000   )
 ( -0.000000   0.000000     0.000000   0.000000    -0.000000   0.000000   )
 (  0.000000   0.000000    -0.000000   0.000000    -0.000000   0.000000   )
 ( -0.000000   0.000000    -0.000000   0.000000     0.000000   0.000000   )
 (  0.000000   0.000000    -0.000000   0.000000     0.000000   0.000000   )
 (  0.000000   0.000000     0.000000   0.000000    -0.000000   0.000000   )
 ( -0.000000   0.000000    -0.000000   0.000000    -0.000000   0.000000   )
 ( -0.000000   0.000000     0.000000   0.000000    -0.000000   0.000000   )
 (  0.000000   0.000000     0.000000   0.000000     0.000000   0.000000   )
 ( -0.000000   0.000000     0.000000   0.000000     0.000000   0.000000   )
 (  0.000000   0.000000     0.000000   0.000000     0.000000   0.000000   )
 (  0.000000   0.000000     0.000000   0.000000    -0.000000   0.000000   )
 ( -0.000000   0.000000     0.000000   0.000000     0.000000   0.000000   )
 (  0.000000   0.000000    -0.000158   0.000000    -0.000000   0.000000   )
 (  0.000000   0.000000    -0.000807   0.000000     0.000000   0.000000   )
 ( -0.000000   0.000000     0.000116   0.000000     0.000000   0.000000   )
 (  0.000478   0.000000     0.000161   0.000000     0.092228   0.000000   )
 ( -0.000478   0.000000     0.000161   0.000000     0.092229   0.000000   )
 (  0.000000   0.000000     0.000990   0.000000    -0.184457   0.000000   )
 (  0.001415   0.000000     0.000806   0.000000     0.383216   0.000000   )
 ( -0.001415   0.000000     0.000806   0.000000     0.383219   0.000000   )
 (  0.000000   0.000000     0.003257   0.000000    -0.766435   0.000000   )
 ( -0.000273   0.000000    -0.000361   0.000000    -0.103225   0.000000   )
 (  0.000273   0.000000    -0.000361   0.000000    -0.103226   0.000000   )
 (  0.000000   0.000000    -0.000835   0.000000     0.206451   0.000000   )
     freq (  482) =     109.522065 [THz] =    3653.262837 [cm-1]
 ( -0.000000   0.000000    -0.000000   0.000000     0.000000   0.000000   )
 ( -0.000000   0.000000    -0.000000   0.000000     0.000000   0.000000   )
 ( -0.000000   0.000000    -0.000000   0.000000     0.000000   0.000000   )
 (  0.000000   0.000000     0.000000   0.000000    -0.000000   0.000000   )
 (  0.000000   0.000000    -0.000000   0.000000     0.000000   0.000000   )
 ( -0.000000   0.000000     0.000000   0.000000     0.000000   0.000000   )
 (  0.000000   0.000000     0.000000   0.000000    -0.000000   0.000000   )
 (  0.000000   0.000000    -0.000000   0.000000     0.000000   0.000000   )
 (  0.000000   0.000000     0.000000   0.000000     0.000000   0.000000   )
 (  0.000000   0.000000     0.000000   0.000000    -0.000000   0.000000   )
 (  0.000000   0.000000    -0.000000   0.000000     0.000000   0.000000   )
 (  0.000000   0.000000     0.000000   0.000000     0.000000   0.000000   )
 (  0.000000   0.000000    -0.000000   0.000000    -0.000000   0.000000   )
 (  0.000000   0.000000    -0.000000   0.000000    -0.000000   0.000000   )
 (  0.000000   0.000000    -0.000000   0.000000     0.000000   0.000000   )
 (  0.000000   0.000000     0.000000   0.000000    -0.000000   0.000000   )
 (  0.000000   0.000000     0.000000   0.000000     0.000000   0.000000   )
 (  0.000000   0.000000     0.000000   0.000000     0.000000   0.000000   )
 (  0.000000   0.000000    -0.000000   0.000000    -0.000000   0.000000   )
 ( -0.000000   0.000000    -0.000000   0.000000     0.000000   0.000000   )
 (  0.000000   0.000000     0.000000   0.000000     0.000000   0.000000   )
 (  0.000000   0.000000    -0.000000   0.000000    -0.000000   0.000000   )
 (  0.000000   0.000000     0.000000   0.000000     0.000000   0.000000   )
 ( -0.000000   0.000000     0.000000   0.000000    -0.000000   0.000000   )
 (  0.000000   0.000000    -0.000000   0.000000    -0.000000   0.000000   )
 ( -0.000000   0.000000    -0.000000   0.000000     0.000000   0.000000   )
 (  0.000000   0.000000     0.000000   0.000000     0.000000   0.000000   )
 (  0.000000   0.000000    -0.000000   0.000000    -0.000000   0.000000   )
 (  0.000000   0.000000     0.000000   0.000000     0.000000   0.000000   )
 ( -0.000000   0.000000     0.000000   0.000000    -0.000000   0.000000   )
 ( -0.000000   0.000000     0.000000   0.000000    -0.000000   0.000000   )
 ( -0.000000   0.000000     0.000000   0.000000     0.000000   0.000000   )
 ( -0.000000   0.000000     0.000000   0.000000    -0.000000   0.000000   )
 ( -0.000000   0.000000    -0.000000   0.000000     0.000000   0.000000   )
 ( -0.000000   0.000000    -0.000000   0.000000     0.000000   0.000000   )
 ( -0.000000   0.000000    -0.000000   0.000000    -0.000000   0.000000   )
 ( -0.000000   0.000000     0.000000   0.000000    -0.000000   0.000000   )
 (  0.000000   0.000000     0.000000   0.000000     0.000000   0.000000   )
 ( -0.000000   0.000000    -0.000000   0.000000    -0.000000   0.000000   )
 ( -0.000000   0.000000     0.000000   0.000000     0.000000   0.000000   )
 ( -0.000000   0.000000    -0.000000   0.000000     0.000000   0.000000   )
 (  0.000000   0.000000    -0.000000   0.000000    -0.000000   0.000000   )
 ( -0.000000   0.000000     0.000000   0.000000    -0.000000   0.000000   )
 (  0.000000   0.000000     0.000000   0.000000     0.000000   0.000000   )
 ( -0.000000   0.000000    -0.000000   0.000000    -0.000000   0.000000   )
 ( -0.000000   0.000000     0.000000   0.000000     0.000000   0.000000   )
 ( -0.000000   0.000000    -0.000000   0.000000     0.000000   0.000000   )
 (  0.000000   0.000000    -0.000000   0.000000    -0.000000   0.000000   )
 (  0.000000   0.000000    -0.000000   0.000000     0.000000   0.000000   )
 ( -0.000000   0.000000    -0.000000   0.000000    -0.000000   0.000000   )
 ( -0.000000   0.000000     0.000000   0.000000     0.000000   0.000000   )
 (  0.000000   0.000000    -0.000000   0.000000     0.000000   0.000000   )
 (  0.000000   0.000000    -0.000000   0.000000    -0.000000   0.000000   )
 (  0.000000   0.000000     0.000000   0.000000     0.000000   0.000000   )
 (  0.000000   0.000000    -0.000000   0.000000     0.000000   0.000000   )
 (  0.000000   0.000000    -0.000000   0.000000    -0.000000   0.000000   )
 (  0.000000   0.000000     0.000000   0.000000     0.000000   0.000000   )
 (  0.000010   0.000000     0.000000   0.000000    -0.000000   0.000000   )
 (  0.000009   0.000000     0.000000   0.000000    -0.000000   0.000000   )
 (  0.000036   0.000000     0.000000   0.000000    -0.000000   0.000000   )
 ( -0.000000   0.000000     0.000000   0.000000    -0.000000   0.000000   )
 (  0.000000   0.000000     0.000000   0.000000     0.000000   0.000000   )
 (  0.000000   0.000000    -0.000000   0.000000    -0.000000   0.000000   )
 ( -0.000000   0.000000     0.000000   0.000000    -0.000000   0.000000   )
 ( -0.000000   0.000000     0.000000   0.000000     0.000000   0.000000   )
 ( -0.000000   0.000000    -0.000000   0.000000    -0.000000   0.000000   )
 ( -0.000000   0.000000     0.000000   0.000000    -0.000000   0.000000   )
 ( -0.000000   0.000000     0.000000   0.000000     0.000000   0.000000   )
 ( -0.000000   0.000000    -0.000000   0.000000    -0.000000   0.000000   )
 ( -0.000057   0.000000    -0.000045   0.000000    -0.005718   0.000000   )
 ( -0.000057   0.000000     0.000045   0.000000     0.005718   0.000000   )
 (  0.000021   0.000000    -0.000000   0.000000     0.000000   0.000000   )
 ( -0.000103   0.000000    -0.000075   0.000000    -0.010046   0.000000   )
 ( -0.000103   0.000000     0.000075   0.000000     0.010046   0.000000   )
 (  0.000027   0.000000    -0.000000   0.000000     0.000000   0.000000   )
 ( -0.000421   0.000000    -0.000245   0.000000    -0.042455   0.000000   )
 ( -0.000421   0.000000     0.000245   0.000000     0.042455   0.000000   )
 (  0.000003   0.000000    -0.000000   0.000000     0.000000   0.000000   )
 (  0.000000   0.000000     0.000000   0.000000     0.000000   0.000000   )
 (  0.000000   0.000000     0.000000   0.000000    -0.000000   0.000000   )
 (  0.000000   0.000000    -0.000000   0.000000     0.000000   0.000000   )
 (  0.000000   0.000000    -0.000000   0.000000     0.000000   0.000000   )
 (  0.000000   0.000000    -0.000000   0.000000    -0.000000   0.000000   )
 (  0.000000   0.000000     0.000000   0.000000     0.000000   0.000000   )
 (  0.000000   0.000000    -0.000000   0.000000     0.000000   0.000000   )
 (  0.000000   0.000000    -0.000000   0.000000    -0.000000   0.000000   )
 (  0.000000   0.000000     0.000000   0.000000     0.000000   0.000000   )
 (  0.000000   0.000000    -0.000000   0.000000     0.000000   0.000000   )
 (  0.000000   0.000000     0.000000   0.000000    -0.000000   0.000000   )
 (  0.000000   0.000000     0.000000   0.000000    -0.000000   0.000000   )
 (  0.000000   0.000000     0.000000   0.000000     0.000000   0.000000   )
 (  0.000000   0.000000    -0.000000   0.000000    -0.000000   0.000000   )
 (  0.000000   0.000000     0.000000   0.000000    -0.000000   0.000000   )
 (  0.000000   0.000000     0.000000   0.000000     0.000000   0.000000   )
 (  0.000000   0.000000    -0.000000   0.000000    -0.000000   0.000000   )
 (  0.000000   0.000000     0.000000   0.000000    -0.000000   0.000000   )
 ( -0.000000   0.000000    -0.000000   0.000000     0.000000   0.000000   )
 ( -0.000000   0.000000    -0.000000   0.000000    -0.000000   0.000000   )
 ( -0.000000   0.000000     0.000000   0.000000     0.000000   0.000000   )
 ( -0.000000   0.000000    -0.000000   0.000000    -0.000000   0.000000   )
 ( -0.000000   0.000000     0.000000   0.000000    -0.000000   0.000000   )
 ( -0.000000   0.000000     0.000000   0.000000     0.000000   0.000000   )
 ( -0.000000   0.000000    -0.000000   0.000000     0.000000   0.000000   )
 ( -0.000000   0.000000     0.000000   0.000000    -0.000000   0.000000   )
 ( -0.000000   0.000000     0.000000   0.000000     0.000000   0.000000   )
 ( -0.000000   0.000000    -0.000000   0.000000    -0.000000   0.000000   )
 ( -0.000000   0.000000     0.000000   0.000000    -0.000000   0.000000   )
 ( -0.000000   0.000000    -0.000000   0.000000     0.000000   0.000000   )
 ( -0.000000   0.000000    -0.000000   0.000000     0.000000   0.000000   )
 ( -0.000000   0.000000     0.000000   0.000000    -0.000000   0.000000   )
 (  0.000000   0.000000     0.000000   0.000000     0.000000   0.000000   )
 (  0.000000   0.000000    -0.000000   0.000000    -0.000000   0.000000   )
 ( -0.000000   0.000000     0.000000   0.000000    -0.000000   0.000000   )
 ( -0.000000   0.000000    -0.000000   0.000000     0.000000   0.000000   )
 (  0.000000   0.000000    -0.000000   0.000000    -0.000000   0.000000   )
 ( -0.000000   0.000000     0.000000   0.000000    -0.000000   0.000000   )
 (  0.000000   0.000000     0.000000   0.000000     0.000000   0.000000   )
 (  0.000000   0.000000    -0.000000   0.000000    -0.000000   0.000000   )
 (  0.000000   0.000000     0.000000   0.000000     0.000000   0.000000   )
 ( -0.000000   0.000000    -0.000000   0.000000     0.000000   0.000000   )
 (  0.000000   0.000000    -0.000000   0.000000    -0.000000   0.000000   )
 ( -0.000000   0.000000    -0.000000   0.000000    -0.000000   0.000000   )
 (  0.000000   0.000000     0.000000   0.000000     0.000000   0.000000   )
 (  0.000000   0.000000    -0.000000   0.000000    -0.000000   0.000000   )
 (  0.000000   0.000000     0.000000   0.000000     0.000000   0.000000   )
 ( -0.000000   0.000000     0.000000   0.000000     0.000000   0.000000   )
 (  0.000000   0.000000    -0.000000   0.000000     0.000000   0.000000   )
 ( -0.000000   0.000000    -0.000000   0.000000    -0.000000   0.000000   )
 (  0.000000   0.000000     0.000000   0.000000     0.000000   0.000000   )
 (  0.000000   0.000000    -0.000000   0.000000    -0.000000   0.000000   )
 (  0.000000   0.000000     0.000000   0.000000    -0.000000   0.000000   )
 ( -0.000000   0.000000     0.000000   0.000000     0.000000   0.000000   )
 ( -0.000000   0.000000     0.000000   0.000000    -0.000000   0.000000   )
 (  0.000000   0.000000     0.000000   0.000000     0.000000   0.000000   )
 (  0.000000   0.000000    -0.000000   0.000000    -0.000000   0.000000   )
 (  0.000000   0.000000     0.000000   0.000000     0.000000   0.000000   )
 ( -0.000000   0.000000    -0.000000   0.000000     0.000000   0.000000   )
 (  0.000000   0.000000    -0.000000   0.000000    -0.000000   0.000000   )
 ( -0.000000   0.000000     0.000000   0.000000     0.000000   0.000000   )
 (  0.000000   0.000000     0.000000   0.000000     0.000000   0.000000   )
 (  0.000000   0.000000    -0.000000   0.000000    -0.000000   0.000000   )
 (  0.000000   0.000000     0.000000   0.000000     0.000000   0.000000   )
 ( -0.000000   0.000000    -0.000000   0.000000    -0.000000   0.000000   )
 (  0.000000   0.000000    -0.000000   0.000000    -0.000000   0.000000   )
 ( -0.000000   0.000000     0.000000   0.000000    -0.000000   0.000000   )
 (  0.000000   0.000000     0.000000   0.000000     0.000000   0.000000   )
 (  0.000000   0.000000    -0.000000   0.000000    -0.000000   0.000000   )
 (  0.000000   0.000000     0.000000   0.000000     0.000000   0.000000   )
 ( -0.000000   0.000000    -0.000000   0.000000     0.000000   0.000000   )
 (  0.000000   0.000000    -0.000000   0.000000    -0.000000   0.000000   )
 ( -0.000205   0.000000    -0.000000   0.000000     0.000000   0.000000   )
 ( -0.000197   0.000000    -0.000000   0.000000     0.000000   0.000000   )
 ( -0.000825   0.000000    -0.000000   0.000000     0.000000   0.000000   )
 (  0.000362   0.000000     0.000313   0.000000     0.091691   0.000000   )
 (  0.000362   0.000000    -0.000313   0.000000    -0.091691   0.000000   )
 ( -0.000179   0.000000     0.000000   0.000000    -0.000000   0.000000   )
 (  0.000666   0.000000     0.000512   0.000000     0.161351   0.000000   )
 (  0.000666   0.000000    -0.000512   0.000000    -0.161351   0.000000   )
 ( -0.000221   0.000000     0.000000   0.000000    -0.000000   0.000000   )
 (  0.002575   0.000000     0.001504   0.000000     0.680891   0.000000   )
 (  0.002575   0.000000    -0.001504   0.000000    -0.680890   0.000000   )
 ( -0.000029   0.000000     0.000000   0.000000    -0.000001   0.000000   )
     freq (  483) =     109.522065 [THz] =    3653.262837 [cm-1]
 (  0.000000   0.000000    -0.000000   0.000000     0.000000   0.000000   )
 (  0.000000   0.000000    -0.000000   0.000000    -0.000000   0.000000   )
 (  0.000000   0.000000    -0.000000   0.000000    -0.000000   0.000000   )
 (  0.000000   0.000000    -0.000000   0.000000    -0.000000   0.000000   )
 ( -0.000000   0.000000    -0.000000   0.000000    -0.000000   0.000000   )
 (  0.000000   0.000000     0.000000   0.000000     0.000000   0.000000   )
 (  0.000000   0.000000     0.000000   0.000000    -0.000000   0.000000   )
 ( -0.000000   0.000000     0.000000   0.000000    -0.000000   0.000000   )
 ( -0.000000   0.000000     0.000000   0.000000     0.000000   0.000000   )
 (  0.000000   0.000000     0.000000   0.000000    -0.000000   0.000000   )
 ( -0.000000   0.000000     0.000000   0.000000    -0.000000   0.000000   )
 ( -0.000000   0.000000     0.000000   0.000000     0.000000   0.000000   )
 (  0.000000   0.000000     0.000000   0.000000     0.000000   0.000000   )
 (  0.000000   0.000000     0.000000   0.000000    -0.000000   0.000000   )
 (  0.000000   0.000000     0.000000   0.000000     0.000000   0.000000   )
 ( -0.000000   0.000000     0.000000   0.000000     0.000000   0.000000   )
 ( -0.000000   0.000000     0.000000   0.000000     0.000000   0.000000   )
 ( -0.000000   0.000000     0.000000   0.000000    -0.000000   0.000000   )
 (  0.000000   0.000000    -0.000000   0.000000     0.000000   0.000000   )
 ( -0.000000   0.000000     0.000000   0.000000    -0.000000   0.000000   )
 (  0.000000   0.000000     0.000000   0.000000     0.000000   0.000000   )
 ( -0.000000   0.000000     0.000000   0.000000     0.000000   0.000000   )
 ( -0.000000   0.000000    -0.000000   0.000000     0.000000   0.000000   )
 (  0.000000   0.000000     0.000000   0.000000    -0.000000   0.000000   )
 (  0.000000   0.000000    -0.000000   0.000000    -0.000000   0.000000   )
 (  0.000000   0.000000     0.000000   0.000000    -0.000000   0.000000   )
 (  0.000000   0.000000     0.000000   0.000000     0.000000   0.000000   )
 ( -0.000000   0.000000     0.000000   0.000000     0.000000   0.000000   )
 ( -0.000000   0.000000    -0.000000   0.000000    -0.000000   0.000000   )
 ( -0.000000   0.000000     0.000000   0.000000    -0.000000   0.000000   )
 ( -0.000000   0.000000    -0.000000   0.000000    -0.000000   0.000000   )
 ( -0.000000   0.000000    -0.000000   0.000000     0.000000   0.000000   )
 ( -0.000000   0.000000    -0.000000   0.000000     0.000000   0.000000   )
 (  0.000000   0.000000    -0.000000   0.000000     0.000000   0.000000   )
 (  0.000000   0.000000    -0.000000   0.000000    -0.000000   0.000000   )
 (  0.000000   0.000000    -0.000000   0.000000     0.000000   0.000000   )
 ( -0.000000   0.000000     0.000000   0.000000    -0.000000   0.000000   )
 ( -0.000000   0.000000    -0.000000   0.000000    -0.000000   0.000000   )
 ( -0.000000   0.000000    -0.000000   0.000000     0.000000   0.000000   )
 (  0.000000   0.000000    -0.000000   0.000000     0.000000   0.000000   )
 (  0.000000   0.000000     0.000000   0.000000    -0.000000   0.000000   )
 (  0.000000   0.000000    -0.000000   0.000000    -0.000000   0.000000   )
 ( -0.000000   0.000000     0.000000   0.000000    -0.000000   0.000000   )
 ( -0.000000   0.000000    -0.000000   0.000000    -0.000000   0.000000   )
 ( -0.000000   0.000000    -0.000000   0.000000     0.000000   0.000000   )
 (  0.000000   0.000000    -0.000000   0.000000     0.000000   0.000000   )
 (  0.000000   0.000000     0.000000   0.000000    -0.000000   0.000000   )
 (  0.000000   0.000000    -0.000000   0.000000    -0.000000   0.000000   )
 ( -0.000000   0.000000    -0.000000   0.000000     0.000000   0.000000   )
 ( -0.000000   0.000000    -0.000000   0.000000    -0.000000   0.000000   )
 (  0.000000   0.000000    -0.000000   0.000000    -0.000000   0.000000   )
 ( -0.000000   0.000000    -0.000000   0.000000     0.000000   0.000000   )
 ( -0.000000   0.000000     0.000000   0.000000    -0.000000   0.000000   )
 (  0.000000   0.000000     0.000000   0.000000    -0.000000   0.000000   )
 ( -0.000000   0.000000    -0.000000   0.000000     0.000000   0.000000   )
 ( -0.000000   0.000000     0.000000   0.000000    -0.000000   0.000000   )
 (  0.000000   0.000000     0.000000   0.000000    -0.000000   0.000000   )
 ( -0.000000   0.000000     0.000010   0.000000    -0.000000   0.000000   )
 ( -0.000000   0.000000     0.000009   0.000000     0.000000   0.000000   )
 ( -0.000000   0.000000     0.000036   0.000000    -0.000000   0.000000   )
 (  0.000000   0.000000     0.000000   0.000000    -0.000000   0.000000   )
 (  0.000000   0.000000    -0.000000   0.000000     0.000000   0.000000   )
 ( -0.000000   0.000000    -0.000000   0.000000     0.000000   0.000000   )
 (  0.000000   0.000000     0.000000   0.000000    -0.000000   0.000000   )
 (  0.000000   0.000000    -0.000000   0.000000     0.000000   0.000000   )
 ( -0.000000   0.000000    -0.000000   0.000000     0.000000   0.000000   )
 (  0.000000   0.000000     0.000000   0.000000    -0.000000   0.000000   )
 (  0.000000   0.000000    -0.000000   0.000000     0.000000   0.000000   )
 ( -0.000000   0.000000    -0.000000   0.000000     0.000000   0.000000   )
 ( -0.000045   0.000000    -0.000005   0.000000    -0.003302   0.000000   )
 (  0.000045   0.000000    -0.000005   0.000000    -0.003302   0.000000   )
 ( -0.000000   0.000000    -0.000082   0.000000     0.006603   0.000000   )
 ( -0.000075   0.000000    -0.000016   0.000000    -0.005800   0.000000   )
 (  0.000075   0.000000    -0.000016   0.000000    -0.005800   0.000000   )
 ( -0.000000   0.000000    -0.000146   0.000000     0.011600   0.000000   )
 ( -0.000245   0.000000    -0.000138   0.000000    -0.024511   0.000000   )
 (  0.000245   0.000000    -0.000138   0.000000    -0.024511   0.000000   )
 ( -0.000000   0.000000    -0.000563   0.000000     0.049022   0.000000   )
 ( -0.000000   0.000000     0.000000   0.000000     0.000000   0.000000   )
 (  0.000000   0.000000     0.000000   0.000000    -0.000000   0.000000   )
 ( -0.000000   0.000000     0.000000   0.000000    -0.000000   0.000000   )
 ( -0.000000   0.000000    -0.000000   0.000000     0.000000   0.000000   )
 ( -0.000000   0.000000     0.000000   0.000000    -0.000000   0.000000   )
 (  0.000000   0.000000     0.000000   0.000000    -0.000000   0.000000   )
 ( -0.000000   0.000000    -0.000000   0.000000     0.000000   0.000000   )
 ( -0.000000   0.000000     0.000000   0.000000    -0.000000   0.000000   )
 (  0.000000   0.000000     0.000000   0.000000    -0.000000   0.000000   )
 ( -0.000000   0.000000     0.000000   0.000000     0.000000   0.000000   )
 (  0.000000   0.000000     0.000000   0.000000     0.000000   0.000000   )
 ( -0.000000   0.000000     0.000000   0.000000    -0.000000   0.000000   )
 (  0.000000   0.000000     0.000000   0.000000     0.000000   0.000000   )
 ( -0.000000   0.000000     0.000000   0.000000     0.000000   0.000000   )
 ( -0.000000   0.000000     0.000000   0.000000    -0.000000   0.000000   )
 (  0.000000   0.000000     0.000000   0.000000     0.000000   0.000000   )
 ( -0.000000   0.000000     0.000000   0.000000     0.000000   0.000000   )
 ( -0.000000   0.000000     0.000000   0.000000    -0.000000   0.000000   )
 (  0.000000   0.000000    -0.000000   0.000000     0.000000   0.000000   )
 ( -0.000000   0.000000    -0.000000   0.000000     0.000000   0.000000   )
 (  0.000000   0.000000    -0.000000   0.000000    -0.000000   0.000000   )
 ( -0.000000   0.000000    -0.000000   0.000000    -0.000000   0.000000   )
 ( -0.000000   0.000000    -0.000000   0.000000     0.000000   0.000000   )
 (  0.000000   0.000000    -0.000000   0.000000     0.000000   0.000000   )
 ( -0.000000   0.000000    -0.000000   0.000000     0.000000   0.000000   )
 ( -0.000000   0.000000    -0.000000   0.000000     0.000000   0.000000   )
 (  0.000000   0.000000    -0.000000   0.000000    -0.000000   0.000000   )
 ( -0.000000   0.000000    -0.000000   0.000000    -0.000000   0.000000   )
 (  0.000000   0.000000    -0.000000   0.000000     0.000000   0.000000   )
 (  0.000000   0.000000    -0.000000   0.000000     0.000000   0.000000   )
 ( -0.000000   0.000000    -0.000000   0.000000     0.000000   0.000000   )
 (  0.000000   0.000000    -0.000000   0.000000     0.000000   0.000000   )
 (  0.000000   0.000000    -0.000000   0.000000    -0.000000   0.000000   )
 ( -0.000000   0.000000    -0.000000   0.000000    -0.000000   0.000000   )
 (  0.000000   0.000000    -0.000000   0.000000     0.000000   0.000000   )
 ( -0.000000   0.000000    -0.000000   0.000000     0.000000   0.000000   )
 ( -0.000000   0.000000     0.000000   0.000000     0.000000   0.000000   )
 (  0.000000   0.000000     0.000000   0.000000    -0.000000   0.000000   )
 ( -0.000000   0.000000    -0.000000   0.000000    -0.000000   0.000000   )
 (  0.000000   0.000000    -0.000000   0.000000    -0.000000   0.000000   )
 (  0.000000   0.000000     0.000000   0.000000     0.000000   0.000000   )
 ( -0.000000   0.000000     0.000000   0.000000    -0.000000   0.000000   )
 ( -0.000000   0.000000    -0.000000   0.000000     0.000000   0.000000   )
 (  0.000000   0.000000     0.000000   0.000000    -0.000000   0.000000   )
 (  0.000000   0.000000    -0.000000   0.000000     0.000000   0.000000   )
 ( -0.000000   0.000000    -0.000000   0.000000     0.000000   0.000000   )
 (  0.000000   0.000000    -0.000000   0.000000     0.000000   0.000000   )
 ( -0.000000   0.000000     0.000000   0.000000    -0.000000   0.000000   )
 ( -0.000000   0.000000    -0.000000   0.000000     0.000000   0.000000   )
 (  0.000000   0.000000     0.000000   0.000000     0.000000   0.000000   )
 (  0.000000   0.000000    -0.000000   0.000000    -0.000000   0.000000   )
 ( -0.000000   0.000000    -0.000000   0.000000    -0.000000   0.000000   )
 (  0.000000   0.000000    -0.000000   0.000000     0.000000   0.000000   )
 ( -0.000000   0.000000     0.000000   0.000000     0.000000   0.000000   )
 ( -0.000000   0.000000     0.000000   0.000000    -0.000000   0.000000   )
 (  0.000000   0.000000     0.000000   0.000000     0.000000   0.000000   )
 ( -0.000000   0.000000    -0.000000   0.000000     0.000000   0.000000   )
 (  0.000000   0.000000    -0.000000   0.000000     0.000000   0.000000   )
 (  0.000000   0.000000     0.000000   0.000000    -0.000000   0.000000   )
 ( -0.000000   0.000000     0.000000   0.000000     0.000000   0.000000   )
 ( -0.000000   0.000000     0.000000   0.000000    -0.000000   0.000000   )
 (  0.000000   0.000000    -0.000000   0.000000     0.000000   0.000000   )
 ( -0.000000   0.000000    -0.000000   0.000000     0.000000   0.000000   )
 (  0.000000   0.000000    -0.000000   0.000000     0.000000   0.000000   )
 (  0.000000   0.000000     0.000000   0.000000    -0.000000   0.000000   )
 ( -0.000000   0.000000    -0.000000   0.000000     0.000000   0.000000   )
 ( -0.000000   0.000000     0.000000   0.000000    -0.000000   0.000000   )
 (  0.000000   0.000000    -0.000000   0.000000    -0.000000   0.000000   )
 ( -0.000000   0.000000    -0.000000   0.000000     0.000000   0.000000   )
 (  0.000000   0.000000    -0.000000   0.000000     0.000000   0.000000   )
 (  0.000000   0.000000     0.000000   0.000000    -0.000000   0.000000   )
 ( -0.000000   0.000000    -0.000000   0.000000    -0.000000   0.000000   )
 (  0.000000   0.000000    -0.000205   0.000000     0.000000   0.000000   )
 (  0.000000   0.000000    -0.000197   0.000000    -0.000000   0.000000   )
 (  0.000000   0.000000    -0.000825   0.000000     0.000000   0.000000   )
 (  0.000313   0.000000     0.000001   0.000000     0.052938   0.000000   )
 ( -0.000313   0.000000     0.000001   0.000000     0.052938   0.000000   )
 (  0.000000   0.000000     0.000543   0.000000    -0.105876   0.000000   )
 (  0.000512   0.000000     0.000075   0.000000     0.093156   0.000000   )
 ( -0.000512   0.000000     0.000075   0.000000     0.093156   0.000000   )
 (  0.000000   0.000000     0.000962   0.000000    -0.186312   0.000000   )
 (  0.001504   0.000000     0.000839   0.000000     0.393112   0.000000   )
 ( -0.001504   0.000000     0.000839   0.000000     0.393113   0.000000   )
 (  0.000000   0.000000     0.003443   0.000000    -0.786225   0.000000   )
     freq (  484) =     115.607957 [THz] =    3856.266374 [cm-1]
 ( -0.000000   0.000000    -0.000000   0.000000     0.000000   0.000000   )
 ( -0.000000   0.000000    -0.000000   0.000000    -0.000000   0.000000   )
 ( -0.000000   0.000000     0.000000   0.000000     0.000000   0.000000   )
 (  0.000000   0.000000     0.000000   0.000000    -0.000000   0.000000   )
 ( -0.000000   0.000000     0.000000   0.000000    -0.000000   0.000000   )
 ( -0.000000   0.000000    -0.000000   0.000000    -0.000000   0.000000   )
 ( -0.000000   0.000000    -0.000000   0.000000    -0.000000   0.000000   )
 (  0.000000   0.000000    -0.000000   0.000000    -0.000000   0.000000   )
 (  0.000000   0.000000     0.000000   0.000000    -0.000000   0.000000   )
 (  0.000000   0.000000     0.000000   0.000000     0.000000   0.000000   )
 ( -0.000000   0.000000     0.000000   0.000000     0.000000   0.000000   )
 ( -0.000000   0.000000    -0.000000   0.000000     0.000000   0.000000   )
 (  0.000000   0.000000    -0.000000   0.000000    -0.000000   0.000000   )
 ( -0.000000   0.000000     0.000000   0.000000    -0.000000   0.000000   )
 ( -0.000000   0.000000    -0.000000   0.000000    -0.000000   0.000000   )
 (  0.000000   0.000000    -0.000000   0.000000    -0.000000   0.000000   )
 ( -0.000000   0.000000    -0.000000   0.000000    -0.000000   0.000000   )
 (  0.000000   0.000000     0.000000   0.000000    -0.000000   0.000000   )
 (  0.000000   0.000000     0.000000   0.000000    -0.000000   0.000000   )
 ( -0.000000   0.000000    -0.000000   0.000000    -0.000000   0.000000   )
 (  0.000000   0.000000    -0.000000   0.000000    -0.000000   0.000000   )
 ( -0.000000   0.000000    -0.000000   0.000000    -0.000000   0.000000   )
 ( -0.000000   0.000000     0.000000   0.000000    -0.000000   0.000000   )
 (  0.000000   0.000000    -0.000000   0.000000    -0.000000   0.000000   )
 (  0.000000   0.000000     0.000000   0.000000     0.000000   0.000000   )
 ( -0.000000   0.000000     0.000000   0.000000     0.000000   0.000000   )
 ( -0.000000   0.000000    -0.000000   0.000000     0.000000   0.000000   )
 (  0.000000   0.000000    -0.000000   0.000000     0.000000   0.000000   )
 ( -0.000000   0.000000     0.000000   0.000000     0.000000   0.000000   )
 (  0.000000   0.000000     0.000000   0.000000     0.000000   0.000000   )
 ( -0.000000   0.000000    -0.000000   0.000000    -0.000000   0.000000   )
 (  0.000000   0.000000     0.000000   0.000000    -0.000000   0.000000   )
 ( -0.000000   0.000000     0.000000   0.000000    -0.000000   0.000000   )
 (  0.000000   0.000000     0.000000   0.000000    -0.000000   0.000000   )
 (  0.000000   0.000000    -0.000000   0.000000    -0.000000   0.000000   )
 ( -0.000000   0.000000     0.000000   0.000000    -0.000000   0.000000   )
 ( -0.000000   0.000000    -0.000000   0.000000     0.000000   0.000000   )
 (  0.000000   0.000000    -0.000000   0.000000     0.000000   0.000000   )
 ( -0.000000   0.000000     0.000000   0.000000     0.000000   0.000000   )
 (  0.000000   0.000000     0.000000   0.000000     0.000000   0.000000   )
 (  0.000000   0.000000    -0.000000   0.000000     0.000000   0.000000   )
 ( -0.000000   0.000000    -0.000000   0.000000     0.000000   0.000000   )
 (  0.000000   0.000000     0.000000   0.000000    -0.000000   0.000000   )
 ( -0.000000   0.000000     0.000000   0.000000    -0.000000   0.000000   )
 (  0.000000   0.000000    -0.000000   0.000000    -0.000000   0.000000   )
 ( -0.000000   0.000000    -0.000000   0.000000    -0.000000   0.000000   )
 ( -0.000000   0.000000     0.000000   0.000000    -0.000000   0.000000   )
 (  0.000000   0.000000     0.000000   0.000000    -0.000000   0.000000   )
 ( -0.000000   0.000000     0.000000   0.000000     0.000000   0.000000   )
 ( -0.000000   0.000000    -0.000000   0.000000     0.000000   0.000000   )
 (  0.000000   0.000000    -0.000000   0.000000     0.000000   0.000000   )
 ( -0.000000   0.000000    -0.000000   0.000000    -0.000000   0.000000   )
 (  0.000000   0.000000     0.000000   0.000000    -0.000000   0.000000   )
 ( -0.000000   0.000000     0.000000   0.000000    -0.000000   0.000000   )
 ( -0.000000   0.000000     0.000000   0.000000     0.000000   0.000000   )
 ( -0.000000   0.000000    -0.000000   0.000000     0.000000   0.000000   )
 (  0.000000   0.000000    -0.000000   0.000000     0.000000   0.000000   )
 (  0.000000   0.000000     0.000000   0.000000     0.000112   0.000000   )
 ( -0.000000   0.000000    -0.000000   0.000000    -0.061986   0.000000   )
 (  0.000000   0.000000     0.000000   0.000000     0.002720   0.000000   )
 (  0.000000   0.000000     0.000000   0.000000    -0.000000   0.000000   )
 ( -0.000000   0.000000    -0.000000   0.000000    -0.000000   0.000000   )
 (  0.000000   0.000000    -0.000000   0.000000    -0.000000   0.000000   )
 (  0.000000   0.000000     0.000000   0.000000     0.000000   0.000000   )
 ( -0.000000   0.000000    -0.000000   0.000000     0.000000   0.000000   )
 (  0.000000   0.000000    -0.000000   0.000000     0.000000   0.000000   )
 (  0.000000   0.000000    -0.000000   0.000000    -0.000000   0.000000   )
 (  0.000000   0.000000     0.000000   0.000000    -0.000000   0.000000   )
 ( -0.000000   0.000000     0.000000   0.000000    -0.000000   0.000000   )
 ( -0.000006   0.000000    -0.000003   0.000000    -0.000014   0.000000   )
 (  0.000006   0.000000    -0.000003   0.000000    -0.000014   0.000000   )
 (  0.000000   0.000000     0.000007   0.000000    -0.000014   0.000000   )
 ( -0.000002   0.000000    -0.000001   0.000000     0.000067   0.000000   )
 (  0.000002   0.000000    -0.000001   0.000000     0.000067   0.000000   )
 ( -0.000000   0.000000     0.000003   0.000000     0.000067   0.000000   )
 ( -0.000001   0.000000    -0.000000   0.000000    -0.000002   0.000000   )
 (  0.000001   0.000000    -0.000000   0.000000    -0.000002   0.000000   )
 ( -0.000000   0.000000     0.000001   0.000000    -0.000002   0.000000   )
 ( -0.000000   0.000000     0.000000   0.000000     0.000000   0.000000   )
 ( -0.000000   0.000000    -0.000000   0.000000     0.000000   0.000000   )
 (  0.000000   0.000000    -0.000000   0.000000     0.000000   0.000000   )
 ( -0.000000   0.000000     0.000000   0.000000    -0.000000   0.000000   )
 ( -0.000000   0.000000    -0.000000   0.000000    -0.000000   0.000000   )
 (  0.000000   0.000000    -0.000000   0.000000    -0.000000   0.000000   )
 ( -0.000000   0.000000    -0.000000   0.000000     0.000000   0.000000   )
 (  0.000000   0.000000     0.000000   0.000000     0.000000   0.000000   )
 ( -0.000000   0.000000     0.000000   0.000000     0.000000   0.000000   )
 ( -0.000000   0.000000    -0.000000   0.000000     0.000000   0.000000   )
 (  0.000000   0.000000    -0.000000   0.000000     0.000000   0.000000   )
 (  0.000000   0.000000     0.000000   0.000000     0.000000   0.000000   )
 (  0.000000   0.000000     0.000000   0.000000    -0.000000   0.000000   )
 ( -0.000000   0.000000     0.000000   0.000000    -0.000000   0.000000   )
 ( -0.000000   0.000000    -0.000000   0.000000    -0.000000   0.000000   )
 ( -0.000000   0.000000    -0.000000   0.000000     0.000000   0.000000   )
 (  0.000000   0.000000    -0.000000   0.000000     0.000000   0.000000   )
 ( -0.000000   0.000000     0.000000   0.000000     0.000000   0.000000   )
 ( -0.000000   0.000000     0.000000   0.000000     0.000000   0.000000   )
 (  0.000000   0.000000    -0.000000   0.000000     0.000000   0.000000   )
 (  0.000000   0.000000     0.000000   0.000000     0.000000   0.000000   )
 ( -0.000000   0.000000     0.000000   0.000000     0.000000   0.000000   )
 (  0.000000   0.000000     0.000000   0.000000     0.000000   0.000000   )
 ( -0.000000   0.000000    -0.000000   0.000000     0.000000   0.000000   )
 ( -0.000000   0.000000    -0.000000   0.000000    -0.000000   0.000000   )
 (  0.000000   0.000000    -0.000000   0.000000    -0.000000   0.000000   )
 ( -0.000000   0.000000     0.000000   0.000000    -0.000000   0.000000   )
 (  0.000000   0.000000     0.000000   0.000000    -0.000000   0.000000   )
 (  0.000000   0.000000    -0.000000   0.000000    -0.000000   0.000000   )
 ( -0.000000   0.000000    -0.000000   0.000000    -0.000000   0.000000   )
 (  0.000000   0.000000    -0.000000   0.000000    -0.000000   0.000000   )
 ( -0.000000   0.000000     0.000000   0.000000    -0.000000   0.000000   )
 ( -0.000000   0.000000    -0.000000   0.000000    -0.000000   0.000000   )
 (  0.000000   0.000000    -0.000000   0.000000    -0.000000   0.000000   )
 ( -0.000000   0.000000    -0.000000   0.000000    -0.000000   0.000000   )
 (  0.000000   0.000000     0.000000   0.000000    -0.000000   0.000000   )
 (  0.000000   0.000000     0.000000   0.000000     0.000000   0.000000   )
 ( -0.000000   0.000000     0.000000   0.000000     0.000000   0.000000   )
 (  0.000000   0.000000    -0.000000   0.000000     0.000000   0.000000   )
 ( -0.000000   0.000000    -0.000000   0.000000     0.000000   0.000000   )
 ( -0.000000   0.000000     0.000000   0.000000     0.000000   0.000000   )
 (  0.000000   0.000000     0.000000   0.000000     0.000000   0.000000   )
 (  0.000000   0.000000     0.000000   0.000000    -0.000000   0.000000   )
 ( -0.000000   0.000000     0.000000   0.000000    -0.000000   0.000000   )
 (  0.000000   0.000000    -0.000000   0.000000    -0.000000   0.000000   )
 ( -0.000000   0.000000    -0.000000   0.000000    -0.000000   0.000000   )
 ( -0.000000   0.000000     0.000000   0.000000    -0.000000   0.000000   )
 (  0.000000   0.000000     0.000000   0.000000    -0.000000   0.000000   )
 ( -0.000000   0.000000    -0.000000   0.000000     0.000000   0.000000   )
 (  0.000000   0.000000     0.000000   0.000000     0.000000   0.000000   )
 ( -0.000000   0.000000     0.000000   0.000000     0.000000   0.000000   )
 (  0.000000   0.000000     0.000000   0.000000     0.000000   0.000000   )
 (  0.000000   0.000000    -0.000000   0.000000     0.000000   0.000000   )
 ( -0.000000   0.000000     0.000000   0.000000     0.000000   0.000000   )
 ( -0.000000   0.000000     0.000000   0.000000    -0.000000   0.000000   )
 (  0.000000   0.000000    -0.000000   0.000000    -0.000000   0.000000   )
 (  0.000000   0.000000     0.000000   0.000000    -0.000000   0.000000   )
 ( -0.000000   0.000000     0.000000   0.000000    -0.000000   0.000000   )
 (  0.000000   0.000000     0.000000   0.000000    -0.000000   0.000000   )
 ( -0.000000   0.000000    -0.000000   0.000000    -0.000000   0.000000   )
 (  0.000000   0.000000     0.000000   0.000000     0.000000   0.000000   )
 ( -0.000000   0.000000     0.000000   0.000000     0.000000   0.000000   )
 (  0.000000   0.000000    -0.000000   0.000000     0.000000   0.000000   )
 ( -0.000000   0.000000    -0.000000   0.000000     0.000000   0.000000   )
 ( -0.000000   0.000000     0.000000   0.000000     0.000000   0.000000   )
 (  0.000000   0.000000     0.000000   0.000000     0.000000   0.000000   )
 (  0.000000   0.000000     0.000000   0.000000    -0.000000   0.000000   )
 ( -0.000000   0.000000    -0.000000   0.000000    -0.000000   0.000000   )
 (  0.000000   0.000000    -0.000000   0.000000    -0.000000   0.000000   )
 ( -0.000000   0.000000    -0.000000   0.000000    -0.000000   0.000000   )
 ( -0.000000   0.000000     0.000000   0.000000    -0.000000   0.000000   )
 (  0.000000   0.000000    -0.000000   0.000000    -0.000000   0.000000   )
 ( -0.000000   0.000000     0.000000   0.000000    -0.001777   0.000000   )
 (  0.000000   0.000000     0.000000   0.000000     0.997110   0.000000   )
 ( -0.000000   0.000000     0.000000   0.000000    -0.043764   0.000000   )
 (  0.000037   0.000000     0.000021   0.000000     0.000301   0.000000   )
 ( -0.000037   0.000000     0.000021   0.000000     0.000301   0.000000   )
 ( -0.000000   0.000000    -0.000042   0.000000     0.000301   0.000000   )
 ( -0.000087   0.000000    -0.000050   0.000000    -0.000936   0.000000   )
 (  0.000087   0.000000    -0.000050   0.000000    -0.000936   0.000000   )
 ( -0.000000   0.000000     0.000100   0.000000    -0.000936   0.000000   )
 (  0.000004   0.000000     0.000002   0.000000     0.000001   0.000000   )
 ( -0.000004   0.000000     0.000002   0.000000     0.000001   0.000000   )
 (  0.000000   0.000000    -0.000004   0.000000     0.000001   0.000000   )
     freq (  485) =     115.608368 [THz] =    3856.280052 [cm-1]
 ( -0.000000   0.000000    -0.000000   0.000000    -0.000000   0.000000   )
 (  0.000000   0.000000    -0.000000   0.000000     0.000000   0.000000   )
 ( -0.000000   0.000000    -0.000000   0.000000     0.000000   0.000000   )
 ( -0.000000   0.000000    -0.000000   0.000000    -0.000000   0.000000   )
 (  0.000000   0.000000    -0.000000   0.000000    -0.000000   0.000000   )
 (  0.000000   0.000000     0.000000   0.000000    -0.000000   0.000000   )
 (  0.000000   0.000000     0.000000   0.000000     0.000000   0.000000   )
 ( -0.000000   0.000000     0.000000   0.000000     0.000000   0.000000   )
 (  0.000000   0.000000    -0.000000   0.000000     0.000000   0.000000   )
 (  0.000000   0.000000     0.000000   0.000000     0.000000   0.000000   )
 ( -0.000000   0.000000     0.000000   0.000000     0.000000   0.000000   )
 ( -0.000000   0.000000    -0.000000   0.000000     0.000000   0.000000   )
 ( -0.000000   0.000000    -0.000000   0.000000    -0.000000   0.000000   )
 (  0.000000   0.000000    -0.000000   0.000000    -0.000000   0.000000   )
 (  0.000000   0.000000     0.000000   0.000000    -0.000000   0.000000   )
 ( -0.000000   0.000000     0.000000   0.000000    -0.000000   0.000000   )
 (  0.000000   0.000000    -0.000000   0.000000    -0.000000   0.000000   )
 ( -0.000000   0.000000    -0.000000   0.000000    -0.000000   0.000000   )
 ( -0.000000   0.000000    -0.000000   0.000000     0.000000   0.000000   )
 (  0.000000   0.000000    -0.000000   0.000000     0.000000   0.000000   )
 (  0.000000   0.000000     0.000000   0.000000     0.000000   0.000000   )
 ( -0.000000   0.000000     0.000000   0.000000     0.000000   0.000000   )
 (  0.000000   0.000000    -0.000000   0.000000     0.000000   0.000000   )
 ( -0.000000   0.000000    -0.000000   0.000000     0.000000   0.000000   )
 ( -0.000000   0.000000    -0.000000   0.000000     0.000000   0.000000   )
 (  0.000000   0.000000     0.000000   0.000000     0.000000   0.000000   )
 ( -0.000000   0.000000     0.000000   0.000000     0.000000   0.000000   )
 (  0.000000   0.000000     0.000000   0.000000     0.000000   0.000000   )
 (  0.000000   0.000000    -0.000000   0.000000     0.000000   0.000000   )
 ( -0.000000   0.000000     0.000000   0.000000     0.000000   0.000000   )
 ( -0.000000   0.000000    -0.000000   0.000000     0.000000   0.000000   )
 (  0.000000   0.000000    -0.000000   0.000000     0.000000   0.000000   )
 ( -0.000000   0.000000     0.000000   0.000000     0.000000   0.000000   )
 (  0.000000   0.000000     0.000000   0.000000     0.000000   0.000000   )
 (  0.000000   0.000000    -0.000000   0.000000     0.000000   0.000000   )
 ( -0.000000   0.000000    -0.000000   0.000000     0.000000   0.000000   )
 (  0.000000   0.000000     0.000000   0.000000    -0.000000   0.000000   )
 ( -0.000000   0.000000    -0.000000   0.000000    -0.000000   0.000000   )
 (  0.000000   0.000000    -0.000000   0.000000    -0.000000   0.000000   )
 ( -0.000000   0.000000    -0.000000   0.000000    -0.000000   0.000000   )
 ( -0.000000   0.000000     0.000000   0.000000    -0.000000   0.000000   )
 (  0.000000   0.000000    -0.000000   0.000000    -0.000000   0.000000   )
 (  0.000000   0.000000     0.000000   0.000000    -0.000000   0.000000   )
 ( -0.000000   0.000000     0.000000   0.000000    -0.000000   0.000000   )
 (  0.000000   0.000000    -0.000000   0.000000    -0.000000   0.000000   )
 ( -0.000000   0.000000    -0.000000   0.000000    -0.000000   0.000000   )
 ( -0.000000   0.000000     0.000000   0.000000    -0.000000   0.000000   )
 (  0.000000   0.000000     0.000000   0.000000    -0.000000   0.000000   )
 (  0.000000   0.000000     0.000000   0.000000    -0.000000   0.000000   )
 ( -0.000000   0.000000    -0.000000   0.000000    -0.000000   0.000000   )
 (  0.000000   0.000000    -0.000000   0.000000    -0.000000   0.000000   )
 ( -0.000000   0.000000     0.000000   0.000000     0.000000   0.000000   )
 ( -0.000000   0.000000    -0.000000   0.000000     0.000000   0.000000   )
 (  0.000000   0.000000    -0.000000   0.000000     0.000000   0.000000   )
 ( -0.000000   0.000000     0.000000   0.000000     0.000000   0.000000   )
 ( -0.000000   0.000000    -0.000000   0.000000     0.000000   0.000000   )
 (  0.000000   0.000000    -0.000000   0.000000     0.000000   0.000000   )
 (  0.000000   0.000000     0.000000   0.000000    -0.000778   0.000000   )
 ( -0.000000   0.000000    -0.000000   0.000000     0.002718   0.000000   )
 (  0.000000   0.000000     0.000000   0.000000     0.061983   0.000000   )
 ( -0.000000   0.000000    -0.000000   0.000000     0.000000   0.000000   )
 (  0.000000   0.000000     0.000000   0.000000     0.000000   0.000000   )
 ( -0.000000   0.000000     0.000000   0.000000     0.000000   0.000000   )
 (  0.000000   0.000000    -0.000000   0.000000    -0.000000   0.000000   )
 (  0.000000   0.000000     0.000000   0.000000    -0.000000   0.000000   )
 ( -0.000000   0.000000     0.000000   0.000000    -0.000000   0.000000   )
 ( -0.000000   0.000000    -0.000000   0.000000    -0.000000   0.000000   )
 (  0.000000   0.000000     0.000000   0.000000    -0.000000   0.000000   )
 ( -0.000000   0.000000     0.000000   0.000000    -0.000000   0.000000   )
 (  0.000001   0.000000     0.000001   0.000000    -0.000000   0.000000   )
 ( -0.000001   0.000000     0.000001   0.000000    -0.000000   0.000000   )
 (  0.000000   0.000000    -0.000001   0.000000    -0.000000   0.000000   )
 (  0.000006   0.000000     0.000003   0.000000     0.000011   0.000000   )
 ( -0.000006   0.000000     0.000003   0.000000     0.000011   0.000000   )
 (  0.000000   0.000000    -0.000007   0.000000     0.000011   0.000000   )
 (  0.000003   0.000000     0.000002   0.000000    -0.000067   0.000000   )
 ( -0.000003   0.000000     0.000002   0.000000    -0.000067   0.000000   )
 (  0.000000   0.000000    -0.000003   0.000000    -0.000067   0.000000   )
 (  0.000000   0.000000     0.000000   0.000000    -0.000000   0.000000   )
 ( -0.000000   0.000000    -0.000000   0.000000    -0.000000   0.000000   )
 (  0.000000   0.000000    -0.000000   0.000000    -0.000000   0.000000   )
 (  0.000000   0.000000    -0.000000   0.000000     0.000000   0.000000   )
 (  0.000000   0.000000     0.000000   0.000000     0.000000   0.000000   )
 ( -0.000000   0.000000     0.000000   0.000000     0.000000   0.000000   )
 (  0.000000   0.000000    -0.000000   0.000000     0.000000   0.000000   )
 (  0.000000   0.000000     0.000000   0.000000     0.000000   0.000000   )
 ( -0.000000   0.000000     0.000000   0.000000     0.000000   0.000000   )
 (  0.000000   0.000000     0.000000   0.000000    -0.000000   0.000000   )
 ( -0.000000   0.000000     0.000000   0.000000    -0.000000   0.000000   )
 (  0.000000   0.000000    -0.000000   0.000000    -0.000000   0.000000   )
 ( -0.000000   0.000000    -0.000000   0.000000     0.000000   0.000000   )
 (  0.000000   0.000000    -0.000000   0.000000     0.000000   0.000000   )
 ( -0.000000   0.000000     0.000000   0.000000     0.000000   0.000000   )
 ( -0.000000   0.000000    -0.000000   0.000000     0.000000   0.000000   )
 (  0.000000   0.000000    -0.000000   0.000000     0.000000   0.000000   )
 (  0.000000   0.000000     0.000000   0.000000     0.000000   0.000000   )
 ( -0.000000   0.000000     0.000000   0.000000     0.000000   0.000000   )
 ( -0.000000   0.000000    -0.000000   0.000000     0.000000   0.000000   )
 (  0.000000   0.000000    -0.000000   0.000000     0.000000   0.000000   )
 ( -0.000000   0.000000    -0.000000   0.000000     0.000000   0.000000   )
 (  0.000000   0.000000     0.000000   0.000000     0.000000   0.000000   )
 (  0.000000   0.000000    -0.000000   0.000000     0.000000   0.000000   )
 (  0.000000   0.000000     0.000000   0.000000    -0.000000   0.000000   )
 ( -0.000000   0.000000     0.000000   0.000000    -0.000000   0.000000   )
 ( -0.000000   0.000000    -0.000000   0.000000    -0.000000   0.000000   )
 (  0.000000   0.000000    -0.000000   0.000000    -0.000000   0.000000   )
 ( -0.000000   0.000000     0.000000   0.000000    -0.000000   0.000000   )
 (  0.000000   0.000000     0.000000   0.000000    -0.000000   0.000000   )
 (  0.000000   0.000000     0.000000   0.000000     0.000000   0.000000   )
 ( -0.000000   0.000000     0.000000   0.000000     0.000000   0.000000   )
 (  0.000000   0.000000    -0.000000   0.000000     0.000000   0.000000   )
 ( -0.000000   0.000000    -0.000000   0.000000     0.000000   0.000000   )
 ( -0.000000   0.000000     0.000000   0.000000     0.000000   0.000000   )
 (  0.000000   0.000000     0.000000   0.000000     0.000000   0.000000   )
 (  0.000000   0.000000     0.000000   0.000000    -0.000000   0.000000   )
 ( -0.000000   0.000000    -0.000000   0.000000    -0.000000   0.000000   )
 (  0.000000   0.000000    -0.000000   0.000000    -0.000000   0.000000   )
 ( -0.000000   0.000000    -0.000000   0.000000    -0.000000   0.000000   )
 ( -0.000000   0.000000     0.000000   0.000000    -0.000000   0.000000   )
 (  0.000000   0.000000    -0.000000   0.000000    -0.000000   0.000000   )
 ( -0.000000   0.000000    -0.000000   0.000000    -0.000000   0.000000   )
 (  0.000000   0.000000    -0.000000   0.000000    -0.000000   0.000000   )
 ( -0.000000   0.000000     0.000000   0.000000    -0.000000   0.000000   )
 (  0.000000   0.000000     0.000000   0.000000    -0.000000   0.000000   )
 (  0.000000   0.000000    -0.000000   0.000000    -0.000000   0.000000   )
 ( -0.000000   0.000000    -0.000000   0.000000    -0.000000   0.000000   )
 ( -0.000000   0.000000    -0.000000   0.000000     0.000000   0.000000   )
 (  0.000000   0.000000    -0.000000   0.000000     0.000000   0.000000   )
 ( -0.000000   0.000000     0.000000   0.000000     0.000000   0.000000   )
 (  0.000000   0.000000     0.000000   0.000000     0.000000   0.000000   )
 (  0.000000   0.000000    -0.000000   0.000000     0.000000   0.000000   )
 ( -0.000000   0.000000    -0.000000   0.000000     0.000000   0.000000   )
 ( -0.000000   0.000000    -0.000000   0.000000     0.000000   0.000000   )
 (  0.000000   0.000000     0.000000   0.000000     0.000000   0.000000   )
 ( -0.000000   0.000000     0.000000   0.000000     0.000000   0.000000   )
 (  0.000000   0.000000     0.000000   0.000000     0.000000   0.000000   )
 (  0.000000   0.000000    -0.000000   0.000000     0.000000   0.000000   )
 ( -0.000000   0.000000     0.000000   0.000000     0.000000   0.000000   )
 (  0.000000   0.000000    -0.000000   0.000000     0.000000   0.000000   )
 (  0.000000   0.000000     0.000000   0.000000     0.000000   0.000000   )
 ( -0.000000   0.000000    -0.000000   0.000000     0.000000   0.000000   )
 (  0.000000   0.000000    -0.000000   0.000000     0.000000   0.000000   )
 ( -0.000000   0.000000    -0.000000   0.000000     0.000000   0.000000   )
 ( -0.000000   0.000000     0.000000   0.000000     0.000000   0.000000   )
 ( -0.000000   0.000000    -0.000000   0.000000    -0.000000   0.000000   )
 (  0.000000   0.000000    -0.000000   0.000000    -0.000000   0.000000   )
 ( -0.000000   0.000000     0.000000   0.000000    -0.000000   0.000000   )
 (  0.000000   0.000000     0.000000   0.000000    -0.000000   0.000000   )
 (  0.000000   0.000000    -0.000000   0.000000    -0.000000   0.000000   )
 ( -0.000000   0.000000    -0.000000   0.000000    -0.000000   0.000000   )
 ( -0.000000   0.000000     0.000000   0.000000     0.012521   0.000000   )
 (  0.000000   0.000000     0.000000   0.000000    -0.043740   0.000000   )
 ( -0.000000   0.000000     0.000000   0.000000    -0.997034   0.000000   )
 ( -0.000003   0.000000    -0.000002   0.000000     0.000020   0.000000   )
 (  0.000003   0.000000    -0.000002   0.000000     0.000020   0.000000   )
 ( -0.000000   0.000000     0.000003   0.000000     0.000020   0.000000   )
 ( -0.000034   0.000000    -0.000020   0.000000    -0.000250   0.000000   )
 (  0.000034   0.000000    -0.000020   0.000000    -0.000250   0.000000   )
 (  0.000000   0.000000     0.000039   0.000000    -0.000250   0.000000   )
 (  0.000085   0.000000     0.000049   0.000000     0.000927   0.000000   )
 ( -0.000085   0.000000     0.000049   0.000000     0.000927   0.000000   )
 (  0.000000   0.000000    -0.000099   0.000000     0.000927   0.000000   )
     freq (  486) =     115.609129 [THz] =    3856.305454 [cm-1]
 (  0.000000   0.000000    -0.000000   0.000000    -0.000000   0.000000   )
 ( -0.000000   0.000000     0.000000   0.000000    -0.000000   0.000000   )
 ( -0.000000   0.000000    -0.000000   0.000000    -0.000000   0.000000   )
 ( -0.000000   0.000000    -0.000000   0.000000    -0.000000   0.000000   )
 (  0.000000   0.000000    -0.000000   0.000000    -0.000000   0.000000   )
 (  0.000000   0.000000     0.000000   0.000000    -0.000000   0.000000   )
 (  0.000000   0.000000     0.000000   0.000000     0.000000   0.000000   )
 ( -0.000000   0.000000     0.000000   0.000000     0.000000   0.000000   )
 (  0.000000   0.000000    -0.000000   0.000000     0.000000   0.000000   )
 ( -0.000000   0.000000    -0.000000   0.000000    -0.000000   0.000000   )
 (  0.000000   0.000000    -0.000000   0.000000    -0.000000   0.000000   )
 ( -0.000000   0.000000     0.000000   0.000000    -0.000000   0.000000   )
 (  0.000000   0.000000     0.000000   0.000000    -0.000000   0.000000   )
 ( -0.000000   0.000000    -0.000000   0.000000    -0.000000   0.000000   )
 (  0.000000   0.000000    -0.000000   0.000000    -0.000000   0.000000   )
 ( -0.000000   0.000000    -0.000000   0.000000    -0.000000   0.000000   )
 ( -0.000000   0.000000     0.000000   0.000000    -0.000000   0.000000   )
 (  0.000000   0.000000    -0.000000   0.000000    -0.000000   0.000000   )
 (  0.000000   0.000000     0.000000   0.000000     0.000000   0.000000   )
 ( -0.000000   0.000000     0.000000   0.000000     0.000000   0.000000   )
 ( -0.000000   0.000000    -0.000000   0.000000     0.000000   0.000000   )
 (  0.000000   0.000000    -0.000000   0.000000     0.000000   0.000000   )
 ( -0.000000   0.000000     0.000000   0.000000     0.000000   0.000000   )
 (  0.000000   0.000000     0.000000   0.000000     0.000000   0.000000   )
 (  0.000000   0.000000    -0.000000   0.000000    -0.000000   0.000000   )
 ( -0.000000   0.000000     0.000000   0.000000    -0.000000   0.000000   )
 ( -0.000000   0.000000    -0.000000   0.000000    -0.000000   0.000000   )
 (  0.000000   0.000000    -0.000000   0.000000    -0.000000   0.000000   )
 ( -0.000000   0.000000    -0.000000   0.000000    -0.000000   0.000000   )
 (  0.000000   0.000000     0.000000   0.000000    -0.000000   0.000000   )
 ( -0.000000   0.000000    -0.000000   0.000000     0.000000   0.000000   )
 (  0.000000   0.000000    -0.000000   0.000000     0.000000   0.000000   )
 ( -0.000000   0.000000     0.000000   0.000000     0.000000   0.000000   )
 (  0.000000   0.000000     0.000000   0.000000     0.000000   0.000000   )
 (  0.000000   0.000000    -0.000000   0.000000     0.000000   0.000000   )
 ( -0.000000   0.000000    -0.000000   0.000000     0.000000   0.000000   )
 (  0.000000   0.000000     0.000000   0.000000    -0.000000   0.000000   )
 ( -0.000000   0.000000     0.000000   0.000000    -0.000000   0.000000   )
 (  0.000000   0.000000    -0.000000   0.000000    -0.000000   0.000000   )
 ( -0.000000   0.000000    -0.000000   0.000000    -0.000000   0.000000   )
 ( -0.000000   0.000000     0.000000   0.000000    -0.000000   0.000000   )
 (  0.000000   0.000000     0.000000   0.000000    -0.000000   0.000000   )
 ( -0.000000   0.000000    -0.000000   0.000000    -0.000000   0.000000   )
 (  0.000000   0.000000     0.000000   0.000000    -0.000000   0.000000   )
 ( -0.000000   0.000000     0.000000   0.000000    -0.000000   0.000000   )
 (  0.000000   0.000000     0.000000   0.000000    -0.000000   0.000000   )
 (  0.000000   0.000000    -0.000000   0.000000    -0.000000   0.000000   )
 ( -0.000000   0.000000     0.000000   0.000000    -0.000000   0.000000   )
 ( -0.000000   0.000000    -0.000000   0.000000    -0.000000   0.000000   )
 (  0.000000   0.000000     0.000000   0.000000    -0.000000   0.000000   )
 ( -0.000000   0.000000     0.000000   0.000000    -0.000000   0.000000   )
 (  0.000000   0.000000    -0.000000   0.000000     0.000000   0.000000   )
 (  0.000000   0.000000     0.000000   0.000000     0.000000   0.000000   )
 ( -0.000000   0.000000     0.000000   0.000000     0.000000   0.000000   )
 (  0.000000   0.000000    -0.000000   0.000000    -0.000000   0.000000   )
 (  0.000000   0.000000     0.000000   0.000000    -0.000000   0.000000   )
 ( -0.000000   0.000000     0.000000   0.000000    -0.000000   0.000000   )
 (  0.000000   0.000000    -0.000000   0.000000    -0.062048   0.000000   )
 (  0.000000   0.000000     0.000000   0.000000    -0.000145   0.000000   )
 ( -0.000000   0.000000    -0.000000   0.000000    -0.000772   0.000000   )
 (  0.000000   0.000000     0.000000   0.000000     0.000000   0.000000   )
 ( -0.000000   0.000000    -0.000000   0.000000     0.000000   0.000000   )
 (  0.000000   0.000000    -0.000000   0.000000     0.000000   0.000000   )
 ( -0.000000   0.000000     0.000000   0.000000    -0.000000   0.000000   )
 ( -0.000000   0.000000    -0.000000   0.000000    -0.000000   0.000000   )
 (  0.000000   0.000000    -0.000000   0.000000    -0.000000   0.000000   )
 (  0.000000   0.000000     0.000000   0.000000     0.000000   0.000000   )
 ( -0.000000   0.000000    -0.000000   0.000000     0.000000   0.000000   )
 (  0.000000   0.000000    -0.000000   0.000000     0.000000   0.000000   )
 ( -0.000003   0.000000    -0.000001   0.000000     0.000066   0.000000   )
 (  0.000003   0.000000    -0.000001   0.000000     0.000066   0.000000   )
 ( -0.000000   0.000000     0.000003   0.000000     0.000066   0.000000   )
 ( -0.000001   0.000000    -0.000000   0.000000     0.000002   0.000000   )
 (  0.000001   0.000000    -0.000000   0.000000     0.000002   0.000000   )
 ( -0.000000   0.000000     0.000001   0.000000     0.000002   0.000000   )
 ( -0.000006   0.000000    -0.000004   0.000000    -0.000013   0.000000   )
 (  0.000006   0.000000    -0.000004   0.000000    -0.000013   0.000000   )
 (  0.000000   0.000000     0.000007   0.000000    -0.000013   0.000000   )
 (  0.000000   0.000000     0.000000   0.000000    -0.000000   0.000000   )
 ( -0.000000   0.000000    -0.000000   0.000000    -0.000000   0.000000   )
 (  0.000000   0.000000    -0.000000   0.000000    -0.000000   0.000000   )
 (  0.000000   0.000000    -0.000000   0.000000     0.000000   0.000000   )
 (  0.000000   0.000000     0.000000   0.000000     0.000000   0.000000   )
 ( -0.000000   0.000000     0.000000   0.000000     0.000000   0.000000   )
 ( -0.000000   0.000000     0.000000   0.000000     0.000000   0.000000   )
 ( -0.000000   0.000000    -0.000000   0.000000     0.000000   0.000000   )
 (  0.000000   0.000000    -0.000000   0.000000     0.000000   0.000000   )
 (  0.000000   0.000000     0.000000   0.000000    -0.000000   0.000000   )
 ( -0.000000   0.000000     0.000000   0.000000    -0.000000   0.000000   )
 ( -0.000000   0.000000    -0.000000   0.000000    -0.000000   0.000000   )
 ( -0.000000   0.000000    -0.000000   0.000000    -0.000000   0.000000   )
 (  0.000000   0.000000    -0.000000   0.000000    -0.000000   0.000000   )
 ( -0.000000   0.000000     0.000000   0.000000    -0.000000   0.000000   )
 ( -0.000000   0.000000    -0.000000   0.000000     0.000000   0.000000   )
 (  0.000000   0.000000    -0.000000   0.000000     0.000000   0.000000   )
 (  0.000000   0.000000     0.000000   0.000000     0.000000   0.000000   )
 ( -0.000000   0.000000    -0.000000   0.000000    -0.000000   0.000000   )
 (  0.000000   0.000000    -0.000000   0.000000    -0.000000   0.000000   )
 ( -0.000000   0.000000     0.000000   0.000000    -0.000000   0.000000   )
 (  0.000000   0.000000     0.000000   0.000000    -0.000000   0.000000   )
 (  0.000000   0.000000    -0.000000   0.000000    -0.000000   0.000000   )
 ( -0.000000   0.000000    -0.000000   0.000000    -0.000000   0.000000   )
 (  0.000000   0.000000    -0.000000   0.000000    -0.000000   0.000000   )
 (  0.000000   0.000000     0.000000   0.000000    -0.000000   0.000000   )
 ( -0.000000   0.000000     0.000000   0.000000    -0.000000   0.000000   )
 (  0.000000   0.000000     0.000000   0.000000    -0.000000   0.000000   )
 ( -0.000000   0.000000    -0.000000   0.000000    -0.000000   0.000000   )
 ( -0.000000   0.000000     0.000000   0.000000    -0.000000   0.000000   )
 ( -0.000000   0.000000    -0.000000   0.000000     0.000000   0.000000   )
 (  0.000000   0.000000    -0.000000   0.000000     0.000000   0.000000   )
 (  0.000000   0.000000     0.000000   0.000000     0.000000   0.000000   )
 ( -0.000000   0.000000     0.000000   0.000000     0.000000   0.000000   )
 (  0.000000   0.000000    -0.000000   0.000000     0.000000   0.000000   )
 ( -0.000000   0.000000    -0.000000   0.000000     0.000000   0.000000   )
 (  0.000000   0.000000     0.000000   0.000000    -0.000000   0.000000   )
 ( -0.000000   0.000000     0.000000   0.000000    -0.000000   0.000000   )
 (  0.000000   0.000000    -0.000000   0.000000    -0.000000   0.000000   )
 ( -0.000000   0.000000    -0.000000   0.000000    -0.000000   0.000000   )
 ( -0.000000   0.000000     0.000000   0.000000    -0.000000   0.000000   )
 (  0.000000   0.000000     0.000000   0.000000    -0.000000   0.000000   )
 ( -0.000000   0.000000    -0.000000   0.000000     0.000000   0.000000   )
 (  0.000000   0.000000     0.000000   0.000000     0.000000   0.000000   )
 ( -0.000000   0.000000     0.000000   0.000000     0.000000   0.000000   )
 (  0.000000   0.000000     0.000000   0.000000     0.000000   0.000000   )
 (  0.000000   0.000000    -0.000000   0.000000     0.000000   0.000000   )
 ( -0.000000   0.000000     0.000000   0.000000     0.000000   0.000000   )
 (  0.000000   0.000000     0.000000   0.000000     0.000000   0.000000   )
 ( -0.000000   0.000000     0.000000   0.000000     0.000000   0.000000   )
 (  0.000000   0.000000    -0.000000   0.000000     0.000000   0.000000   )
 ( -0.000000   0.000000    -0.000000   0.000000     0.000000   0.000000   )
 ( -0.000000   0.000000     0.000000   0.000000     0.000000   0.000000   )
 (  0.000000   0.000000     0.000000   0.000000     0.000000   0.000000   )
 (  0.000000   0.000000     0.000000   0.000000     0.000000   0.000000   )
 ( -0.000000   0.000000     0.000000   0.000000     0.000000   0.000000   )
 (  0.000000   0.000000    -0.000000   0.000000     0.000000   0.000000   )
 ( -0.000000   0.000000    -0.000000   0.000000     0.000000   0.000000   )
 ( -0.000000   0.000000     0.000000   0.000000     0.000000   0.000000   )
 (  0.000000   0.000000     0.000000   0.000000     0.000000   0.000000   )
 (  0.000000   0.000000     0.000000   0.000000    -0.000000   0.000000   )
 ( -0.000000   0.000000    -0.000000   0.000000    -0.000000   0.000000   )
 (  0.000000   0.000000    -0.000000   0.000000    -0.000000   0.000000   )
 ( -0.000000   0.000000    -0.000000   0.000000    -0.000000   0.000000   )
 ( -0.000000   0.000000     0.000000   0.000000    -0.000000   0.000000   )
 (  0.000000   0.000000    -0.000000   0.000000    -0.000000   0.000000   )
 ( -0.000000   0.000000     0.000000   0.000000    -0.000000   0.000000   )
 ( -0.000000   0.000000    -0.000000   0.000000    -0.000000   0.000000   )
 (  0.000000   0.000000     0.000000   0.000000    -0.000000   0.000000   )
 ( -0.000000   0.000000     0.000000   0.000000    -0.000000   0.000000   )
 (  0.000000   0.000000     0.000000   0.000000    -0.000000   0.000000   )
 (  0.000000   0.000000    -0.000000   0.000000    -0.000000   0.000000   )
 (  0.000000   0.000000     0.000000   0.000000     0.997991   0.000000   )
 ( -0.000000   0.000000     0.000000   0.000000     0.002326   0.000000   )
 (  0.000000   0.000000     0.000000   0.000000     0.012433   0.000000   )
 ( -0.000093   0.000000    -0.000054   0.000000    -0.000901   0.000000   )
 (  0.000093   0.000000    -0.000054   0.000000    -0.000901   0.000000   )
 (  0.000000   0.000000     0.000107   0.000000    -0.000901   0.000000   )
 (  0.000000   0.000000     0.000000   0.000000    -0.000038   0.000000   )
 ( -0.000000   0.000000     0.000000   0.000000    -0.000038   0.000000   )
 ( -0.000000   0.000000    -0.000000   0.000000    -0.000038   0.000000   )
 (  0.000036   0.000000     0.000021   0.000000     0.000267   0.000000   )
 ( -0.000036   0.000000     0.000021   0.000000     0.000267   0.000000   )
 (  0.000000   0.000000    -0.000042   0.000000     0.000267   0.000000   )
 **************************************************************************


 Eigendisplacements of OH stretching modes from dynamical matrix restricted to the 4 OH groups of a single cluster of the hexagonal cell 

     freq (  483) =     109.492632 [THz] =    3652.281083 [cm-1]
 (  0.000000   0.000000     0.000000   0.000000    -0.000000   0.000000   )
 ( -0.000000   0.000000    -0.000000   0.000000    -0.000000   0.000000   )
 (  0.000000   0.000000     0.000000   0.000000     0.000000   0.000000   )
 ( -0.000000   0.000000    -0.000000   0.000000    -0.000000   0.000000   )
 (  0.000000   0.000000    -0.000000   0.000000    -0.000000   0.000000   )
 (  0.000000   0.000000     0.000000   0.000000    -0.000000   0.000000   )
 ( -0.000000   0.000000    -0.000000   0.000000     0.000000   0.000000   )
 (  0.000000   0.000000    -0.000000   0.000000     0.000000   0.000000   )
 ( -0.000000   0.000000     0.000000   0.000000     0.000000   0.000000   )
 (  0.000000   0.000000     0.000000   0.000000    -0.000000   0.000000   )
 ( -0.000000   0.000000     0.000000   0.000000    -0.000000   0.000000   )
 (  0.000000   0.000000    -0.000000   0.000000    -0.000000   0.000000   )
 (  0.000000   0.000000    -0.000000   0.000000    -0.000000   0.000000   )
 (  0.000000   0.000000     0.000000   0.000000    -0.000000   0.000000   )
 ( -0.000000   0.000000     0.000000   0.000000    -0.000000   0.000000   )
 (  0.000000   0.000000     0.000000   0.000000    -0.000000   0.000000   )
 ( -0.000000   0.000000    -0.000000   0.000000    -0.000000   0.000000   )
 ( -0.000000   0.000000     0.000000   0.000000    -0.000000   0.000000   )
 ( -0.000000   0.000000    -0.000000   0.000000     0.000000   0.000000   )
 (  0.000000   0.000000    -0.000000   0.000000     0.000000   0.000000   )
 (  0.000000   0.000000     0.000000   0.000000     0.000000   0.000000   )
 ( -0.000000   0.000000     0.000000   0.000000     0.000000   0.000000   )
 (  0.000000   0.000000    -0.000000   0.000000     0.000000   0.000000   )
 ( -0.000000   0.000000    -0.000000   0.000000     0.000000   0.000000   )
 (  0.000000   0.000000    -0.000000   0.000000    -0.000000   0.000000   )
 (  0.000000   0.000000     0.000000   0.000000    -0.000000   0.000000   )
 ( -0.000000   0.000000    -0.000000   0.000000    -0.000000   0.000000   )
 (  0.000000   0.000000    -0.000000   0.000000    -0.000000   0.000000   )
 ( -0.000000   0.000000    -0.000000   0.000000    -0.000000   0.000000   )
 ( -0.000000   0.000000     0.000000   0.000000    -0.000000   0.000000   )
 (  0.000000   0.000000     0.000000   0.000000     0.000000   0.000000   )
 ( -0.000000   0.000000    -0.000000   0.000000     0.000000   0.000000   )
 (  0.000000   0.000000    -0.000000   0.000000     0.000000   0.000000   )
 ( -0.000000   0.000000    -0.000000   0.000000     0.000000   0.000000   )
 ( -0.000000   0.000000     0.000000   0.000000     0.000000   0.000000   )
 (  0.000000   0.000000    -0.000000   0.000000     0.000000   0.000000   )
 (  0.000000   0.000000     0.000000   0.000000    -0.000000   0.000000   )
 ( -0.000000   0.000000    -0.000000   0.000000    -0.000000   0.000000   )
 (  0.000000   0.000000    -0.000000   0.000000    -0.000000   0.000000   )
 ( -0.000000   0.000000    -0.000000   0.000000    -0.000000   0.000000   )
 ( -0.000000   0.000000     0.000000   0.000000    -0.000000   0.000000   )
 (  0.000000   0.000000    -0.000000   0.000000    -0.000000   0.000000   )
 ( -0.000000   0.000000     0.000000   0.000000    -0.000000   0.000000   )
 ( -0.000000   0.000000    -0.000000   0.000000    -0.000000   0.000000   )
 (  0.000000   0.000000    -0.000000   0.000000    -0.000000   0.000000   )
 ( -0.000000   0.000000    -0.000000   0.000000    -0.000000   0.000000   )
 (  0.000000   0.000000     0.000000   0.000000    -0.000000   0.000000   )
 (  0.000000   0.000000    -0.000000   0.000000    -0.000000   0.000000   )
 ( -0.000000   0.000000     0.000000   0.000000    -0.000000   0.000000   )
 ( -0.000000   0.000000    -0.000000   0.000000    -0.000000   0.000000   )
 (  0.000000   0.000000    -0.000000   0.000000    -0.000000   0.000000   )
 (  0.000000   0.000000    -0.000000   0.000000     0.000000   0.000000   )
 (  0.000000   0.000000     0.000000   0.000000     0.000000   0.000000   )
 ( -0.000000   0.000000     0.000000   0.000000     0.000000   0.000000   )
 ( -0.000000   0.000000     0.000000   0.000000     0.000000   0.000000   )
 ( -0.000000   0.000000    -0.000000   0.000000     0.000000   0.000000   )
 (  0.000000   0.000000    -0.000000   0.000000     0.000000   0.000000   )
 (  0.000000   0.000000     0.000000   0.000000    -0.000000   0.000000   )
 (  0.000000   0.000000     0.000000   0.000000    -0.000000   0.000000   )
 (  0.000000   0.000000    -0.000000   0.000000     0.000002   0.000000   )
 (  0.000000   0.000000    -0.000000   0.000000     0.000000   0.000000   )
 (  0.000000   0.000000     0.000000   0.000000     0.000000   0.000000   )
 ( -0.000000   0.000000     0.000000   0.000000     0.000000   0.000000   )
 ( -0.000000   0.000000     0.000000   0.000000    -0.000000   0.000000   )
 ( -0.000000   0.000000    -0.000000   0.000000    -0.000000   0.000000   )
 (  0.000000   0.000000    -0.000000   0.000000    -0.000000   0.000000   )
 ( -0.000000   0.000000    -0.000000   0.000000    -0.000000   0.000000   )
 (  0.000000   0.000000     0.000000   0.000000    -0.000000   0.000000   )
 ( -0.000000   0.000000     0.000000   0.000000    -0.000000   0.000000   )
 (  0.000000   0.000000     0.000000   0.000000     0.000000   0.000000   )
 ( -0.000000   0.000000     0.000000   0.000000     0.000000   0.000000   )
 ( -0.000000   0.000000    -0.000000   0.000000     0.000000   0.000000   )
 (  0.000000   0.000000     0.000000   0.000000    -0.000000   0.000000   )
 ( -0.000000   0.000000     0.000000   0.000000    -0.000000   0.000000   )
 ( -0.000000   0.000000    -0.000000   0.000000    -0.000000   0.000000   )
 ( -0.000362   0.000000    -0.000209   0.000000    -0.035930   0.000000   )
 (  0.000362   0.000000    -0.000209   0.000000    -0.035930   0.000000   )
 ( -0.000000   0.000000     0.000418   0.000000    -0.035930   0.000000   )
 (  0.000000   0.000000    -0.000000   0.000000    -0.000000   0.000000   )
 (  0.000000   0.000000     0.000000   0.000000    -0.000000   0.000000   )
 ( -0.000000   0.000000     0.000000   0.000000    -0.000000   0.000000   )
 ( -0.000000   0.000000    -0.000000   0.000000     0.000000   0.000000   )
 (  0.000000   0.000000     0.000000   0.000000     0.000000   0.000000   )
 ( -0.000000   0.000000     0.000000   0.000000     0.000000   0.000000   )
 (  0.000000   0.000000    -0.000000   0.000000     0.000000   0.000000   )
 (  0.000000   0.000000     0.000000   0.000000     0.000000   0.000000   )
 ( -0.000000   0.000000     0.000000   0.000000     0.000000   0.000000   )
 ( -0.000000   0.000000    -0.000000   0.000000    -0.000000   0.000000   )
 (  0.000000   0.000000    -0.000000   0.000000    -0.000000   0.000000   )
 (  0.000000   0.000000     0.000000   0.000000    -0.000000   0.000000   )
 ( -0.000000   0.000000    -0.000000   0.000000     0.000000   0.000000   )
 (  0.000000   0.000000    -0.000000   0.000000     0.000000   0.000000   )
 ( -0.000000   0.000000     0.000000   0.000000     0.000000   0.000000   )
 (  0.000000   0.000000     0.000000   0.000000     0.000000   0.000000   )
 ( -0.000000   0.000000     0.000000   0.000000     0.000000   0.000000   )
 (  0.000000   0.000000    -0.000000   0.000000     0.000000   0.000000   )
 ( -0.000000   0.000000     0.000000   0.000000    -0.000000   0.000000   )
 ( -0.000000   0.000000    -0.000000   0.000000    -0.000000   0.000000   )
 (  0.000000   0.000000    -0.000000   0.000000    -0.000000   0.000000   )
 ( -0.000000   0.000000    -0.000000   0.000000    -0.000000   0.000000   )
 (  0.000000   0.000000     0.000000   0.000000    -0.000000   0.000000   )
 (  0.000000   0.000000    -0.000000   0.000000    -0.000000   0.000000   )
 ( -0.000000   0.000000    -0.000000   0.000000    -0.000000   0.000000   )
 (  0.000000   0.000000    -0.000000   0.000000    -0.000000   0.000000   )
 ( -0.000000   0.000000     0.000000   0.000000    -0.000000   0.000000   )
 (  0.000000   0.000000     0.000000   0.000000    -0.000000   0.000000   )
 (  0.000000   0.000000    -0.000000   0.000000    -0.000000   0.000000   )
 ( -0.000000   0.000000    -0.000000   0.000000    -0.000000   0.000000   )
 ( -0.000000   0.000000    -0.000000   0.000000     0.000000   0.000000   )
 (  0.000000   0.000000    -0.000000   0.000000     0.000000   0.000000   )
 ( -0.000000   0.000000     0.000000   0.000000     0.000000   0.000000   )
 (  0.000000   0.000000     0.000000   0.000000     0.000000   0.000000   )
 (  0.000000   0.000000    -0.000000   0.000000     0.000000   0.000000   )
 ( -0.000000   0.000000    -0.000000   0.000000     0.000000   0.000000   )
 (  0.000000   0.000000    -0.000000   0.000000    -0.000000   0.000000   )
 (  0.000000   0.000000     0.000000   0.000000    -0.000000   0.000000   )
 ( -0.000000   0.000000    -0.000000   0.000000    -0.000000   0.000000   )
 (  0.000000   0.000000    -0.000000   0.000000    -0.000000   0.000000   )
 ( -0.000000   0.000000    -0.000000   0.000000    -0.000000   0.000000   )
 ( -0.000000   0.000000     0.000000   0.000000    -0.000000   0.000000   )
 (  0.000000   0.000000    -0.000000   0.000000     0.000000   0.000000   )
 (  0.000000   0.000000     0.000000   0.000000     0.000000   0.000000   )
 ( -0.000000   0.000000    -0.000000   0.000000     0.000000   0.000000   )
 (  0.000000   0.000000    -0.000000   0.000000     0.000000   0.000000   )
 ( -0.000000   0.000000    -0.000000   0.000000     0.000000   0.000000   )
 ( -0.000000   0.000000     0.000000   0.000000     0.000000   0.000000   )
 (  0.000000   0.000000    -0.000000   0.000000     0.000000   0.000000   )
 (  0.000000   0.000000     0.000000   0.000000     0.000000   0.000000   )
 ( -0.000000   0.000000     0.000000   0.000000     0.000000   0.000000   )
 (  0.000000   0.000000     0.000000   0.000000     0.000000   0.000000   )
 ( -0.000000   0.000000    -0.000000   0.000000     0.000000   0.000000   )
 ( -0.000000   0.000000     0.000000   0.000000     0.000000   0.000000   )
 (  0.000000   0.000000    -0.000000   0.000000     0.000000   0.000000   )
 (  0.000000   0.000000     0.000000   0.000000     0.000000   0.000000   )
 ( -0.000000   0.000000    -0.000000   0.000000     0.000000   0.000000   )
 (  0.000000   0.000000    -0.000000   0.000000     0.000000   0.000000   )
 ( -0.000000   0.000000    -0.000000   0.000000     0.000000   0.000000   )
 ( -0.000000   0.000000     0.000000   0.000000     0.000000   0.000000   )
 (  0.000000   0.000000     0.000000   0.000000    -0.000000   0.000000   )
 ( -0.000000   0.000000     0.000000   0.000000    -0.000000   0.000000   )
 ( -0.000000   0.000000    -0.000000   0.000000    -0.000000   0.000000   )
 (  0.000000   0.000000    -0.000000   0.000000    -0.000000   0.000000   )
 ( -0.000000   0.000000     0.000000   0.000000    -0.000000   0.000000   )
 (  0.000000   0.000000     0.000000   0.000000    -0.000000   0.000000   )
 ( -0.000000   0.000000     0.000000   0.000000    -0.000000   0.000000   )
 ( -0.000000   0.000000    -0.000000   0.000000    -0.000000   0.000000   )
 (  0.000000   0.000000     0.000000   0.000000    -0.000000   0.000000   )
 ( -0.000000   0.000000     0.000000   0.000000    -0.000000   0.000000   )
 (  0.000000   0.000000     0.000000   0.000000    -0.000000   0.000000   )
 (  0.000000   0.000000    -0.000000   0.000000    -0.000000   0.000000   )
 ( -0.000000   0.000000    -0.000000   0.000000     0.000000   0.000000   )
 (  0.000000   0.000000     0.000000   0.000000    -0.000000   0.000000   )
 ( -0.000000   0.000000     0.000000   0.000000     0.001405   0.000000   )
 ( -0.000000   0.000000    -0.000000   0.000000    -0.000000   0.000000   )
 (  0.000000   0.000000    -0.000000   0.000000    -0.000000   0.000000   )
 (  0.000000   0.000000     0.000000   0.000000    -0.000000   0.000000   )
 ( -0.000000   0.000000    -0.000000   0.000000    -0.000000   0.000000   )
 (  0.000000   0.000000    -0.000000   0.000000    -0.000000   0.000000   )
 ( -0.000000   0.000000     0.000000   0.000000    -0.000000   0.000000   )
 (  0.002212   0.000000     0.001277   0.000000     0.576225   0.000000   )
 ( -0.002212   0.000000     0.001277   0.000000     0.576225   0.000000   )
 ( -0.000000   0.000000    -0.002554   0.000000     0.576225   0.000000   )
     freq (  484) =     109.521240 [THz] =    3653.235325 [cm-1]
 ( -0.000000   0.000000     0.000000   0.000000    -0.000000   0.000000   )
 ( -0.000000   0.000000     0.000000   0.000000    -0.000000   0.000000   )
 ( -0.000000   0.000000    -0.000000   0.000000     0.000000   0.000000   )
 ( -0.000000   0.000000     0.000000   0.000000     0.000000   0.000000   )
 ( -0.000000   0.000000    -0.000000   0.000000    -0.000000   0.000000   )
 ( -0.000000   0.000000    -0.000000   0.000000     0.000000   0.000000   )
 (  0.000000   0.000000    -0.000000   0.000000    -0.000000   0.000000   )
 (  0.000000   0.000000     0.000000   0.000000     0.000000   0.000000   )
 (  0.000000   0.000000     0.000000   0.000000     0.000000   0.000000   )
 (  0.000000   0.000000     0.000000   0.000000    -0.000000   0.000000   )
 (  0.000000   0.000000    -0.000000   0.000000     0.000000   0.000000   )
 (  0.000000   0.000000    -0.000000   0.000000    -0.000000   0.000000   )
 (  0.000000   0.000000     0.000000   0.000000    -0.000000   0.000000   )
 (  0.000000   0.000000     0.000000   0.000000    -0.000000   0.000000   )
 (  0.000000   0.000000    -0.000000   0.000000     0.000000   0.000000   )
 (  0.000000   0.000000     0.000000   0.000000    -0.000000   0.000000   )
 (  0.000000   0.000000    -0.000000   0.000000     0.000000   0.000000   )
 (  0.000000   0.000000    -0.000000   0.000000     0.000000   0.000000   )
 (  0.000000   0.000000     0.000000   0.000000    -0.000000   0.000000   )
 (  0.000000   0.000000     0.000000   0.000000     0.000000   0.000000   )
 (  0.000000   0.000000     0.000000   0.000000     0.000000   0.000000   )
 (  0.000000   0.000000    -0.000000   0.000000    -0.000000   0.000000   )
 (  0.000000   0.000000    -0.000000   0.000000     0.000000   0.000000   )
 (  0.000000   0.000000    -0.000000   0.000000    -0.000000   0.000000   )
 (  0.000000   0.000000    -0.000000   0.000000    -0.000000   0.000000   )
 ( -0.000000   0.000000    -0.000000   0.000000     0.000000   0.000000   )
 (  0.000000   0.000000     0.000000   0.000000    -0.000000   0.000000   )
 (  0.000000   0.000000    -0.000000   0.000000     0.000000   0.000000   )
 (  0.000000   0.000000     0.000000   0.000000     0.000000   0.000000   )
 ( -0.000000   0.000000     0.000000   0.000000    -0.000000   0.000000   )
 ( -0.000000   0.000000     0.000000   0.000000    -0.000000   0.000000   )
 ( -0.000000   0.000000    -0.000000   0.000000     0.000000   0.000000   )
 ( -0.000000   0.000000     0.000000   0.000000    -0.000000   0.000000   )
 ( -0.000000   0.000000    -0.000000   0.000000     0.000000   0.000000   )
 ( -0.000000   0.000000    -0.000000   0.000000     0.000000   0.000000   )
 ( -0.000000   0.000000     0.000000   0.000000    -0.000000   0.000000   )
 ( -0.000000   0.000000    -0.000000   0.000000     0.000000   0.000000   )
 (  0.000000   0.000000     0.000000   0.000000    -0.000000   0.000000   )
 (  0.000000   0.000000    -0.000000   0.000000    -0.000000   0.000000   )
 (  0.000000   0.000000     0.000000   0.000000     0.000000   0.000000   )
 ( -0.000000   0.000000     0.000000   0.000000    -0.000000   0.000000   )
 (  0.000000   0.000000    -0.000000   0.000000     0.000000   0.000000   )
 ( -0.000000   0.000000     0.000000   0.000000    -0.000000   0.000000   )
 (  0.000000   0.000000     0.000000   0.000000     0.000000   0.000000   )
 ( -0.000000   0.000000    -0.000000   0.000000    -0.000000   0.000000   )
 ( -0.000000   0.000000     0.000000   0.000000     0.000000   0.000000   )
 ( -0.000000   0.000000    -0.000000   0.000000     0.000000   0.000000   )
 (  0.000000   0.000000    -0.000000   0.000000    -0.000000   0.000000   )
 ( -0.000000   0.000000    -0.000000   0.000000    -0.000000   0.000000   )
 ( -0.000000   0.000000    -0.000000   0.000000    -0.000000   0.000000   )
 ( -0.000000   0.000000     0.000000   0.000000     0.000000   0.000000   )
 (  0.000000   0.000000    -0.000000   0.000000     0.000000   0.000000   )
 (  0.000000   0.000000    -0.000000   0.000000    -0.000000   0.000000   )
 (  0.000000   0.000000     0.000000   0.000000     0.000000   0.000000   )
 (  0.000000   0.000000    -0.000000   0.000000     0.000000   0.000000   )
 (  0.000000   0.000000    -0.000000   0.000000    -0.000000   0.000000   )
 (  0.000000   0.000000     0.000000   0.000000     0.000000   0.000000   )
 (  0.000000   0.000000    -0.000000   0.000000    -0.000000   0.000000   )
 ( -0.000000   0.000000    -0.000000   0.000000     0.000000   0.000000   )
 (  0.000036   0.000000    -0.000000   0.000000     0.000000   0.000000   )
 (  0.000000   0.000000     0.000000   0.000000    -0.000000   0.000000   )
 (  0.000000   0.000000     0.000000   0.000000     0.000000   0.000000   )
 (  0.000000   0.000000    -0.000000   0.000000    -0.000000   0.000000   )
 ( -0.000000   0.000000     0.000000   0.000000     0.000000   0.000000   )
 ( -0.000000   0.000000     0.000000   0.000000    -0.000000   0.000000   )
 ( -0.000000   0.000000    -0.000000   0.000000     0.000000   0.000000   )
 ( -0.000000   0.000000     0.000000   0.000000     0.000000   0.000000   )
 ( -0.000000   0.000000     0.000000   0.000000     0.000000   0.000000   )
 ( -0.000000   0.000000    -0.000000   0.000000    -0.000000   0.000000   )
 (  0.000000   0.000000    -0.000000   0.000000    -0.000000   0.000000   )
 (  0.000000   0.000000     0.000000   0.000000     0.000000   0.000000   )
 (  0.000000   0.000000     0.000000   0.000000     0.000000   0.000000   )
 ( -0.000000   0.000000    -0.000000   0.000000     0.000000   0.000000   )
 ( -0.000000   0.000000     0.000000   0.000000    -0.000000   0.000000   )
 (  0.000000   0.000000    -0.000000   0.000000    -0.000000   0.000000   )
 ( -0.000437   0.000000    -0.000250   0.000000    -0.044005   0.000000   )
 ( -0.000437   0.000000     0.000250   0.000000     0.044005   0.000000   )
 ( -0.000003   0.000000     0.000000   0.000000    -0.000000   0.000000   )
 (  0.000000   0.000000    -0.000000   0.000000    -0.000000   0.000000   )
 (  0.000000   0.000000     0.000000   0.000000    -0.000000   0.000000   )
 (  0.000000   0.000000    -0.000000   0.000000     0.000000   0.000000   )
 (  0.000000   0.000000    -0.000000   0.000000     0.000000   0.000000   )
 (  0.000000   0.000000    -0.000000   0.000000    -0.000000   0.000000   )
 (  0.000000   0.000000     0.000000   0.000000     0.000000   0.000000   )
 (  0.000000   0.000000    -0.000000   0.000000    -0.000000   0.000000   )
 (  0.000000   0.000000    -0.000000   0.000000    -0.000000   0.000000   )
 (  0.000000   0.000000     0.000000   0.000000     0.000000   0.000000   )
 (  0.000000   0.000000    -0.000000   0.000000     0.000000   0.000000   )
 (  0.000000   0.000000     0.000000   0.000000    -0.000000   0.000000   )
 (  0.000000   0.000000     0.000000   0.000000    -0.000000   0.000000   )
 ( -0.000000   0.000000     0.000000   0.000000    -0.000000   0.000000   )
 ( -0.000000   0.000000    -0.000000   0.000000     0.000000   0.000000   )
 ( -0.000000   0.000000     0.000000   0.000000     0.000000   0.000000   )
 (  0.000000   0.000000     0.000000   0.000000     0.000000   0.000000   )
 (  0.000000   0.000000    -0.000000   0.000000    -0.000000   0.000000   )
 (  0.000000   0.000000    -0.000000   0.000000     0.000000   0.000000   )
 (  0.000000   0.000000     0.000000   0.000000     0.000000   0.000000   )
 ( -0.000000   0.000000    -0.000000   0.000000    -0.000000   0.000000   )
 ( -0.000000   0.000000     0.000000   0.000000     0.000000   0.000000   )
 ( -0.000000   0.000000    -0.000000   0.000000    -0.000000   0.000000   )
 (  0.000000   0.000000    -0.000000   0.000000    -0.000000   0.000000   )
 ( -0.000000   0.000000     0.000000   0.000000     0.000000   0.000000   )
 (  0.000000   0.000000     0.000000   0.000000    -0.000000   0.000000   )
 (  0.000000   0.000000    -0.000000   0.000000    -0.000000   0.000000   )
 ( -0.000000   0.000000     0.000000   0.000000     0.000000   0.000000   )
 ( -0.000000   0.000000    -0.000000   0.000000    -0.000000   0.000000   )
 (  0.000000   0.000000    -0.000000   0.000000     0.000000   0.000000   )
 (  0.000000   0.000000     0.000000   0.000000     0.000000   0.000000   )
 ( -0.000000   0.000000    -0.000000   0.000000     0.000000   0.000000   )
 ( -0.000000   0.000000     0.000000   0.000000    -0.000000   0.000000   )
 (  0.000000   0.000000     0.000000   0.000000     0.000000   0.000000   )
 (  0.000000   0.000000    -0.000000   0.000000    -0.000000   0.000000   )
 ( -0.000000   0.000000     0.000000   0.000000    -0.000000   0.000000   )
 ( -0.000000   0.000000    -0.000000   0.000000     0.000000   0.000000   )
 ( -0.000000   0.000000    -0.000000   0.000000    -0.000000   0.000000   )
 (  0.000000   0.000000     0.000000   0.000000    -0.000000   0.000000   )
 (  0.000000   0.000000     0.000000   0.000000     0.000000   0.000000   )
 (  0.000000   0.000000    -0.000000   0.000000    -0.000000   0.000000   )
 ( -0.000000   0.000000     0.000000   0.000000     0.000000   0.000000   )
 (  0.000000   0.000000    -0.000000   0.000000     0.000000   0.000000   )
 ( -0.000000   0.000000     0.000000   0.000000    -0.000000   0.000000   )
 ( -0.000000   0.000000     0.000000   0.000000     0.000000   0.000000   )
 ( -0.000000   0.000000    -0.000000   0.000000     0.000000   0.000000   )
 ( -0.000000   0.000000     0.000000   0.000000    -0.000000   0.000000   )
 ( -0.000000   0.000000    -0.000000   0.000000     0.000000   0.000000   )
 ( -0.000000   0.000000    -0.000000   0.000000    -0.000000   0.000000   )
 (  0.000000   0.000000    -0.000000   0.000000     0.000000   0.000000   )
 ( -0.000000   0.000000    -0.000000   0.000000    -0.000000   0.000000   )
 (  0.000000   0.000000     0.000000   0.000000    -0.000000   0.000000   )
 (  0.000000   0.000000    -0.000000   0.000000     0.000000   0.000000   )
 (  0.000000   0.000000     0.000000   0.000000    -0.000000   0.000000   )
 ( -0.000000   0.000000     0.000000   0.000000     0.000000   0.000000   )
 (  0.000000   0.000000     0.000000   0.000000     0.000000   0.000000   )
 (  0.000000   0.000000     0.000000   0.000000     0.000000   0.000000   )
 (  0.000000   0.000000     0.000000   0.000000    -0.000000   0.000000   )
 (  0.000000   0.000000    -0.000000   0.000000     0.000000   0.000000   )
 (  0.000000   0.000000    -0.000000   0.000000    -0.000000   0.000000   )
 (  0.000000   0.000000    -0.000000   0.000000    -0.000000   0.000000   )
 ( -0.000000   0.000000    -0.000000   0.000000     0.000000   0.000000   )
 ( -0.000000   0.000000     0.000000   0.000000    -0.000000   0.000000   )
 ( -0.000000   0.000000    -0.000000   0.000000    -0.000000   0.000000   )
 ( -0.000000   0.000000     0.000000   0.000000     0.000000   0.000000   )
 ( -0.000000   0.000000     0.000000   0.000000    -0.000000   0.000000   )
 ( -0.000000   0.000000    -0.000000   0.000000     0.000000   0.000000   )
 ( -0.000000   0.000000     0.000000   0.000000    -0.000000   0.000000   )
 (  0.000000   0.000000     0.000000   0.000000     0.000000   0.000000   )
 ( -0.000000   0.000000    -0.000000   0.000000    -0.000000   0.000000   )
 ( -0.000000   0.000000     0.000000   0.000000     0.000000   0.000000   )
 ( -0.000000   0.000000    -0.000000   0.000000     0.000000   0.000000   )
 (  0.000000   0.000000    -0.000000   0.000000    -0.000000   0.000000   )
 ( -0.000000   0.000000     0.000000   0.000000     0.000000   0.000000   )
 (  0.000000   0.000000     0.000000   0.000000    -0.000000   0.000000   )
 ( -0.000832   0.000000     0.000000   0.000000    -0.000000   0.000000   )
 ( -0.000000   0.000000     0.000000   0.000000     0.000000   0.000000   )
 ( -0.000000   0.000000    -0.000000   0.000000    -0.000000   0.000000   )
 ( -0.000000   0.000000    -0.000000   0.000000    -0.000000   0.000000   )
 (  0.000000   0.000000     0.000000   0.000000     0.000000   0.000000   )
 (  0.000000   0.000000    -0.000000   0.000000    -0.000000   0.000000   )
 ( -0.000000   0.000000     0.000000   0.000000     0.000000   0.000000   )
 (  0.002664   0.000000     0.001518   0.000000     0.705729   0.000000   )
 (  0.002664   0.000000    -0.001518   0.000000    -0.705729   0.000000   )
 (  0.000034   0.000000    -0.000000   0.000000    -0.000000   0.000000   )
     freq (  485) =     109.521240 [THz] =    3653.235325 [cm-1]
 ( -0.000000   0.000000     0.000000   0.000000     0.000000   0.000000   )
 (  0.000000   0.000000     0.000000   0.000000     0.000000   0.000000   )
 ( -0.000000   0.000000     0.000000   0.000000     0.000000   0.000000   )
 ( -0.000000   0.000000     0.000000   0.000000    -0.000000   0.000000   )
 (  0.000000   0.000000     0.000000   0.000000    -0.000000   0.000000   )
 ( -0.000000   0.000000     0.000000   0.000000     0.000000   0.000000   )
 (  0.000000   0.000000    -0.000000   0.000000     0.000000   0.000000   )
 ( -0.000000   0.000000    -0.000000   0.000000     0.000000   0.000000   )
 (  0.000000   0.000000     0.000000   0.000000    -0.000000   0.000000   )
 ( -0.000000   0.000000    -0.000000   0.000000     0.000000   0.000000   )
 (  0.000000   0.000000    -0.000000   0.000000     0.000000   0.000000   )
 ( -0.000000   0.000000    -0.000000   0.000000    -0.000000   0.000000   )
 ( -0.000000   0.000000    -0.000000   0.000000    -0.000000   0.000000   )
 ( -0.000000   0.000000    -0.000000   0.000000     0.000000   0.000000   )
 (  0.000000   0.000000    -0.000000   0.000000     0.000000   0.000000   )
 ( -0.000000   0.000000    -0.000000   0.000000     0.000000   0.000000   )
 (  0.000000   0.000000    -0.000000   0.000000    -0.000000   0.000000   )
 (  0.000000   0.000000    -0.000000   0.000000     0.000000   0.000000   )
 (  0.000000   0.000000     0.000000   0.000000    -0.000000   0.000000   )
 (  0.000000   0.000000    -0.000000   0.000000     0.000000   0.000000   )
 (  0.000000   0.000000    -0.000000   0.000000    -0.000000   0.000000   )
 ( -0.000000   0.000000    -0.000000   0.000000    -0.000000   0.000000   )
 ( -0.000000   0.000000     0.000000   0.000000    -0.000000   0.000000   )
 ( -0.000000   0.000000    -0.000000   0.000000     0.000000   0.000000   )
 ( -0.000000   0.000000     0.000000   0.000000     0.000000   0.000000   )
 ( -0.000000   0.000000    -0.000000   0.000000     0.000000   0.000000   )
 ( -0.000000   0.000000    -0.000000   0.000000    -0.000000   0.000000   )
 (  0.000000   0.000000    -0.000000   0.000000    -0.000000   0.000000   )
 (  0.000000   0.000000     0.000000   0.000000     0.000000   0.000000   )
 (  0.000000   0.000000    -0.000000   0.000000     0.000000   0.000000   )
 ( -0.000000   0.000000     0.000000   0.000000     0.000000   0.000000   )
 (  0.000000   0.000000     0.000000   0.000000    -0.000000   0.000000   )
 ( -0.000000   0.000000     0.000000   0.000000    -0.000000   0.000000   )
 (  0.000000   0.000000     0.000000   0.000000    -0.000000   0.000000   )
 (  0.000000   0.000000     0.000000   0.000000     0.000000   0.000000   )
 ( -0.000000   0.000000     0.000000   0.000000    -0.000000   0.000000   )
 (  0.000000   0.000000    -0.000000   0.000000     0.000000   0.000000   )
 ( -0.000000   0.000000    -0.000000   0.000000    -0.000000   0.000000   )
 (  0.000000   0.000000     0.000000   0.000000     0.000000   0.000000   )
 ( -0.000000   0.000000     0.000000   0.000000     0.000000   0.000000   )
 ( -0.000000   0.000000    -0.000000   0.000000     0.000000   0.000000   )
 (  0.000000   0.000000    -0.000000   0.000000    -0.000000   0.000000   )
 (  0.000000   0.000000    -0.000000   0.000000     0.000000   0.000000   )
 (  0.000000   0.000000     0.000000   0.000000     0.000000   0.000000   )
 (  0.000000   0.000000     0.000000   0.000000    -0.000000   0.000000   )
 ( -0.000000   0.000000     0.000000   0.000000    -0.000000   0.000000   )
 ( -0.000000   0.000000    -0.000000   0.000000     0.000000   0.000000   )
 ( -0.000000   0.000000     0.000000   0.000000     0.000000   0.000000   )
 (  0.000000   0.000000     0.000000   0.000000    -0.000000   0.000000   )
 (  0.000000   0.000000     0.000000   0.000000     0.000000   0.000000   )
 ( -0.000000   0.000000     0.000000   0.000000     0.000000   0.000000   )
 ( -0.000000   0.000000     0.000000   0.000000    -0.000000   0.000000   )
 (  0.000000   0.000000    -0.000000   0.000000     0.000000   0.000000   )
 ( -0.000000   0.000000    -0.000000   0.000000     0.000000   0.000000   )
 (  0.000000   0.000000    -0.000000   0.000000    -0.000000   0.000000   )
 (  0.000000   0.000000    -0.000000   0.000000     0.000000   0.000000   )
 ( -0.000000   0.000000    -0.000000   0.000000     0.000000   0.000000   )
 ( -0.000000   0.000000    -0.000000   0.000000     0.000000   0.000000   )
 ( -0.000000   0.000000     0.000000   0.000000    -0.000000   0.000000   )
 ( -0.000000   0.000000    -0.000036   0.000000     0.000000   0.000000   )
 ( -0.000000   0.000000    -0.000000   0.000000     0.000000   0.000000   )
 ( -0.000000   0.000000    -0.000000   0.000000    -0.000000   0.000000   )
 (  0.000000   0.000000    -0.000000   0.000000    -0.000000   0.000000   )
 (  0.000000   0.000000    -0.000000   0.000000    -0.000000   0.000000   )
 ( -0.000000   0.000000     0.000000   0.000000     0.000000   0.000000   )
 (  0.000000   0.000000     0.000000   0.000000     0.000000   0.000000   )
 (  0.000000   0.000000    -0.000000   0.000000     0.000000   0.000000   )
 ( -0.000000   0.000000     0.000000   0.000000    -0.000000   0.000000   )
 (  0.000000   0.000000     0.000000   0.000000    -0.000000   0.000000   )
 (  0.000000   0.000000    -0.000000   0.000000     0.000000   0.000000   )
 ( -0.000000   0.000000    -0.000000   0.000000     0.000000   0.000000   )
 (  0.000000   0.000000     0.000000   0.000000    -0.000000   0.000000   )
 (  0.000000   0.000000    -0.000000   0.000000    -0.000000   0.000000   )
 ( -0.000000   0.000000    -0.000000   0.000000    -0.000000   0.000000   )
 (  0.000000   0.000000     0.000000   0.000000     0.000000   0.000000   )
 (  0.000250   0.000000     0.000148   0.000000     0.025406   0.000000   )
 ( -0.000250   0.000000     0.000148   0.000000     0.025406   0.000000   )
 (  0.000000   0.000000     0.000581   0.000000    -0.050812   0.000000   )
 ( -0.000000   0.000000    -0.000000   0.000000    -0.000000   0.000000   )
 ( -0.000000   0.000000    -0.000000   0.000000     0.000000   0.000000   )
 (  0.000000   0.000000    -0.000000   0.000000     0.000000   0.000000   )
 (  0.000000   0.000000     0.000000   0.000000    -0.000000   0.000000   )
 (  0.000000   0.000000    -0.000000   0.000000     0.000000   0.000000   )
 ( -0.000000   0.000000    -0.000000   0.000000     0.000000   0.000000   )
 ( -0.000000   0.000000     0.000000   0.000000    -0.000000   0.000000   )
 (  0.000000   0.000000    -0.000000   0.000000     0.000000   0.000000   )
 ( -0.000000   0.000000    -0.000000   0.000000     0.000000   0.000000   )
 (  0.000000   0.000000    -0.000000   0.000000    -0.000000   0.000000   )
 ( -0.000000   0.000000    -0.000000   0.000000    -0.000000   0.000000   )
 ( -0.000000   0.000000    -0.000000   0.000000     0.000000   0.000000   )
 ( -0.000000   0.000000     0.000000   0.000000     0.000000   0.000000   )
 (  0.000000   0.000000     0.000000   0.000000     0.000000   0.000000   )
 (  0.000000   0.000000     0.000000   0.000000    -0.000000   0.000000   )
 ( -0.000000   0.000000    -0.000000   0.000000    -0.000000   0.000000   )
 (  0.000000   0.000000    -0.000000   0.000000    -0.000000   0.000000   )
 ( -0.000000   0.000000    -0.000000   0.000000     0.000000   0.000000   )
 ( -0.000000   0.000000     0.000000   0.000000    -0.000000   0.000000   )
 (  0.000000   0.000000     0.000000   0.000000     0.000000   0.000000   )
 ( -0.000000   0.000000     0.000000   0.000000     0.000000   0.000000   )
 (  0.000000   0.000000     0.000000   0.000000     0.000000   0.000000   )
 (  0.000000   0.000000     0.000000   0.000000    -0.000000   0.000000   )
 ( -0.000000   0.000000     0.000000   0.000000     0.000000   0.000000   )
 (  0.000000   0.000000     0.000000   0.000000    -0.000000   0.000000   )
 (  0.000000   0.000000     0.000000   0.000000     0.000000   0.000000   )
 (  0.000000   0.000000    -0.000000   0.000000     0.000000   0.000000   )
 ( -0.000000   0.000000    -0.000000   0.000000     0.000000   0.000000   )
 ( -0.000000   0.000000     0.000000   0.000000    -0.000000   0.000000   )
 ( -0.000000   0.000000     0.000000   0.000000     0.000000   0.000000   )
 (  0.000000   0.000000     0.000000   0.000000    -0.000000   0.000000   )
 ( -0.000000   0.000000    -0.000000   0.000000    -0.000000   0.000000   )
 ( -0.000000   0.000000     0.000000   0.000000     0.000000   0.000000   )
 (  0.000000   0.000000     0.000000   0.000000     0.000000   0.000000   )
 ( -0.000000   0.000000     0.000000   0.000000    -0.000000   0.000000   )
 (  0.000000   0.000000    -0.000000   0.000000    -0.000000   0.000000   )
 (  0.000000   0.000000    -0.000000   0.000000    -0.000000   0.000000   )
 ( -0.000000   0.000000    -0.000000   0.000000     0.000000   0.000000   )
 (  0.000000   0.000000     0.000000   0.000000     0.000000   0.000000   )
 ( -0.000000   0.000000     0.000000   0.000000     0.000000   0.000000   )
 ( -0.000000   0.000000    -0.000000   0.000000    -0.000000   0.000000   )
 (  0.000000   0.000000    -0.000000   0.000000     0.000000   0.000000   )
 ( -0.000000   0.000000     0.000000   0.000000    -0.000000   0.000000   )
 (  0.000000   0.000000     0.000000   0.000000     0.000000   0.000000   )
 (  0.000000   0.000000     0.000000   0.000000    -0.000000   0.000000   )
 ( -0.000000   0.000000     0.000000   0.000000    -0.000000   0.000000   )
 (  0.000000   0.000000     0.000000   0.000000    -0.000000   0.000000   )
 ( -0.000000   0.000000     0.000000   0.000000     0.000000   0.000000   )
 ( -0.000000   0.000000     0.000000   0.000000    -0.000000   0.000000   )
 ( -0.000000   0.000000    -0.000000   0.000000    -0.000000   0.000000   )
 ( -0.000000   0.000000     0.000000   0.000000     0.000000   0.000000   )
 (  0.000000   0.000000     0.000000   0.000000     0.000000   0.000000   )
 (  0.000000   0.000000     0.000000   0.000000    -0.000000   0.000000   )
 (  0.000000   0.000000    -0.000000   0.000000    -0.000000   0.000000   )
 (  0.000000   0.000000    -0.000000   0.000000     0.000000   0.000000   )
 ( -0.000000   0.000000    -0.000000   0.000000    -0.000000   0.000000   )
 (  0.000000   0.000000    -0.000000   0.000000    -0.000000   0.000000   )
 ( -0.000000   0.000000    -0.000000   0.000000    -0.000000   0.000000   )
 ( -0.000000   0.000000    -0.000000   0.000000     0.000000   0.000000   )
 (  0.000000   0.000000    -0.000000   0.000000    -0.000000   0.000000   )
 ( -0.000000   0.000000    -0.000000   0.000000     0.000000   0.000000   )
 ( -0.000000   0.000000     0.000000   0.000000    -0.000000   0.000000   )
 (  0.000000   0.000000     0.000000   0.000000     0.000000   0.000000   )
 ( -0.000000   0.000000     0.000000   0.000000     0.000000   0.000000   )
 (  0.000000   0.000000    -0.000000   0.000000     0.000000   0.000000   )
 (  0.000000   0.000000     0.000000   0.000000    -0.000000   0.000000   )
 (  0.000000   0.000000    -0.000000   0.000000     0.000000   0.000000   )
 ( -0.000000   0.000000     0.000000   0.000000     0.000000   0.000000   )
 (  0.000000   0.000000     0.000000   0.000000    -0.000000   0.000000   )
 ( -0.000000   0.000000     0.000000   0.000000    -0.000000   0.000000   )
 ( -0.000000   0.000000    -0.000000   0.000000     0.000000   0.000000   )
 (  0.000000   0.000000     0.000000   0.000000     0.000000   0.000000   )
 (  0.000000   0.000000     0.000000   0.000000    -0.000000   0.000000   )
 ( -0.000000   0.000000    -0.000000   0.000000    -0.000000   0.000000   )
 (  0.000000   0.000000     0.000832   0.000000    -0.000000   0.000000   )
 ( -0.000000   0.000000     0.000000   0.000000    -0.000000   0.000000   )
 (  0.000000   0.000000     0.000000   0.000000    -0.000000   0.000000   )
 ( -0.000000   0.000000    -0.000000   0.000000     0.000000   0.000000   )
 ( -0.000000   0.000000     0.000000   0.000000    -0.000000   0.000000   )
 (  0.000000   0.000000     0.000000   0.000000    -0.000000   0.000000   )
 (  0.000000   0.000000    -0.000000   0.000000     0.000000   0.000000   )
 ( -0.001518   0.000000    -0.000911   0.000000    -0.407453   0.000000   )
 (  0.001518   0.000000    -0.000911   0.000000    -0.407453   0.000000   )
 (  0.000000   0.000000    -0.003540   0.000000     0.814906   0.000000   )
     freq (  486) =     115.606917 [THz] =    3856.231677 [cm-1]
 (  0.000000   0.000000    -0.000000   0.000000     0.000000   0.000000   )
 ( -0.000000   0.000000    -0.000000   0.000000     0.000000   0.000000   )
 (  0.000000   0.000000    -0.000000   0.000000     0.000000   0.000000   )
 ( -0.000000   0.000000    -0.000000   0.000000    -0.000000   0.000000   )
 (  0.000000   0.000000    -0.000000   0.000000    -0.000000   0.000000   )
 (  0.000000   0.000000     0.000000   0.000000    -0.000000   0.000000   )
 ( -0.000000   0.000000    -0.000000   0.000000     0.000000   0.000000   )
 (  0.000000   0.000000    -0.000000   0.000000     0.000000   0.000000   )
 ( -0.000000   0.000000     0.000000   0.000000     0.000000   0.000000   )
 (  0.000000   0.000000     0.000000   0.000000     0.000000   0.000000   )
 ( -0.000000   0.000000     0.000000   0.000000     0.000000   0.000000   )
 (  0.000000   0.000000    -0.000000   0.000000     0.000000   0.000000   )
 ( -0.000000   0.000000    -0.000000   0.000000    -0.000000   0.000000   )
 (  0.000000   0.000000     0.000000   0.000000    -0.000000   0.000000   )
 ( -0.000000   0.000000     0.000000   0.000000    -0.000000   0.000000   )
 (  0.000000   0.000000     0.000000   0.000000    -0.000000   0.000000   )
 (  0.000000   0.000000    -0.000000   0.000000    -0.000000   0.000000   )
 ( -0.000000   0.000000     0.000000   0.000000    -0.000000   0.000000   )
 ( -0.000000   0.000000     0.000000   0.000000     0.000000   0.000000   )
 (  0.000000   0.000000    -0.000000   0.000000     0.000000   0.000000   )
 (  0.000000   0.000000     0.000000   0.000000     0.000000   0.000000   )
 ( -0.000000   0.000000     0.000000   0.000000     0.000000   0.000000   )
 (  0.000000   0.000000     0.000000   0.000000     0.000000   0.000000   )
 ( -0.000000   0.000000    -0.000000   0.000000     0.000000   0.000000   )
 ( -0.000000   0.000000    -0.000000   0.000000     0.000000   0.000000   )
 (  0.000000   0.000000    -0.000000   0.000000     0.000000   0.000000   )
 ( -0.000000   0.000000     0.000000   0.000000     0.000000   0.000000   )
 (  0.000000   0.000000     0.000000   0.000000     0.000000   0.000000   )
 (  0.000000   0.000000    -0.000000   0.000000     0.000000   0.000000   )
 ( -0.000000   0.000000    -0.000000   0.000000     0.000000   0.000000   )
 ( -0.000000   0.000000    -0.000000   0.000000     0.000000   0.000000   )
 (  0.000000   0.000000     0.000000   0.000000     0.000000   0.000000   )
 ( -0.000000   0.000000     0.000000   0.000000     0.000000   0.000000   )
 (  0.000000   0.000000     0.000000   0.000000     0.000000   0.000000   )
 (  0.000000   0.000000    -0.000000   0.000000     0.000000   0.000000   )
 ( -0.000000   0.000000     0.000000   0.000000     0.000000   0.000000   )
 ( -0.000000   0.000000     0.000000   0.000000     0.000000   0.000000   )
 ( -0.000000   0.000000    -0.000000   0.000000     0.000000   0.000000   )
 (  0.000000   0.000000    -0.000000   0.000000     0.000000   0.000000   )
 ( -0.000000   0.000000    -0.000000   0.000000     0.000000   0.000000   )
 (  0.000000   0.000000     0.000000   0.000000     0.000000   0.000000   )
 (  0.000000   0.000000    -0.000000   0.000000     0.000000   0.000000   )
 (  0.000000   0.000000     0.000000   0.000000    -0.000000   0.000000   )
 ( -0.000000   0.000000     0.000000   0.000000    -0.000000   0.000000   )
 (  0.000000   0.000000    -0.000000   0.000000    -0.000000   0.000000   )
 ( -0.000000   0.000000    -0.000000   0.000000    -0.000000   0.000000   )
 ( -0.000000   0.000000     0.000000   0.000000    -0.000000   0.000000   )
 (  0.000000   0.000000     0.000000   0.000000    -0.000000   0.000000   )
 (  0.000000   0.000000    -0.000000   0.000000    -0.000000   0.000000   )
 (  0.000000   0.000000     0.000000   0.000000    -0.000000   0.000000   )
 ( -0.000000   0.000000     0.000000   0.000000    -0.000000   0.000000   )
 (  0.000000   0.000000    -0.000000   0.000000     0.000000   0.000000   )
 (  0.000000   0.000000     0.000000   0.000000     0.000000   0.000000   )
 ( -0.000000   0.000000     0.000000   0.000000     0.000000   0.000000   )
 ( -0.000000   0.000000     0.000000   0.000000     0.000000   0.000000   )
 ( -0.000000   0.000000    -0.000000   0.000000     0.000000   0.000000   )
 (  0.000000   0.000000    -0.000000   0.000000     0.000000   0.000000   )
 ( -0.000000   0.000000     0.000000   0.000000    -0.000000   0.000000   )
 (  0.000000   0.000000     0.000000   0.000000    -0.000000   0.000000   )
 ( -0.000000   0.000000     0.000000   0.000000     0.062024   0.000000   )
 ( -0.000000   0.000000    -0.000000   0.000000     0.000000   0.000000   )
 (  0.000000   0.000000     0.000000   0.000000     0.000000   0.000000   )
 ( -0.000000   0.000000     0.000000   0.000000     0.000000   0.000000   )
 (  0.000000   0.000000    -0.000000   0.000000     0.000000   0.000000   )
 (  0.000000   0.000000     0.000000   0.000000     0.000000   0.000000   )
 ( -0.000000   0.000000     0.000000   0.000000     0.000000   0.000000   )
 (  0.000000   0.000000    -0.000000   0.000000    -0.000000   0.000000   )
 (  0.000000   0.000000     0.000000   0.000000    -0.000000   0.000000   )
 ( -0.000000   0.000000     0.000000   0.000000    -0.000000   0.000000   )
 ( -0.000000   0.000000    -0.000000   0.000000     0.000000   0.000000   )
 (  0.000000   0.000000    -0.000000   0.000000     0.000000   0.000000   )
 ( -0.000000   0.000000     0.000000   0.000000     0.000000   0.000000   )
 (  0.000000   0.000000     0.000000   0.000000    -0.000000   0.000000   )
 ( -0.000000   0.000000     0.000000   0.000000    -0.000000   0.000000   )
 ( -0.000000   0.000000    -0.000000   0.000000    -0.000000   0.000000   )
 (  0.000003   0.000000     0.000002   0.000000    -0.000060   0.000000   )
 ( -0.000003   0.000000     0.000002   0.000000    -0.000060   0.000000   )
 ( -0.000000   0.000000    -0.000004   0.000000    -0.000060   0.000000   )
 ( -0.000000   0.000000    -0.000000   0.000000    -0.000000   0.000000   )
 (  0.000000   0.000000     0.000000   0.000000    -0.000000   0.000000   )
 ( -0.000000   0.000000     0.000000   0.000000    -0.000000   0.000000   )
 ( -0.000000   0.000000    -0.000000   0.000000    -0.000000   0.000000   )
 (  0.000000   0.000000     0.000000   0.000000    -0.000000   0.000000   )
 ( -0.000000   0.000000     0.000000   0.000000    -0.000000   0.000000   )
 ( -0.000000   0.000000    -0.000000   0.000000     0.000000   0.000000   )
 (  0.000000   0.000000     0.000000   0.000000     0.000000   0.000000   )
 ( -0.000000   0.000000     0.000000   0.000000     0.000000   0.000000   )
 ( -0.000000   0.000000    -0.000000   0.000000    -0.000000   0.000000   )
 (  0.000000   0.000000    -0.000000   0.000000    -0.000000   0.000000   )
 ( -0.000000   0.000000     0.000000   0.000000    -0.000000   0.000000   )
 ( -0.000000   0.000000    -0.000000   0.000000    -0.000000   0.000000   )
 (  0.000000   0.000000    -0.000000   0.000000    -0.000000   0.000000   )
 (  0.000000   0.000000     0.000000   0.000000    -0.000000   0.000000   )
 ( -0.000000   0.000000    -0.000000   0.000000     0.000000   0.000000   )
 (  0.000000   0.000000    -0.000000   0.000000     0.000000   0.000000   )
 ( -0.000000   0.000000     0.000000   0.000000     0.000000   0.000000   )
 (  0.000000   0.000000     0.000000   0.000000     0.000000   0.000000   )
 ( -0.000000   0.000000    -0.000000   0.000000     0.000000   0.000000   )
 (  0.000000   0.000000    -0.000000   0.000000     0.000000   0.000000   )
 ( -0.000000   0.000000    -0.000000   0.000000     0.000000   0.000000   )
 ( -0.000000   0.000000     0.000000   0.000000     0.000000   0.000000   )
 (  0.000000   0.000000    -0.000000   0.000000     0.000000   0.000000   )
 (  0.000000   0.000000    -0.000000   0.000000    -0.000000   0.000000   )
 (  0.000000   0.000000     0.000000   0.000000    -0.000000   0.000000   )
 ( -0.000000   0.000000     0.000000   0.000000    -0.000000   0.000000   )
 (  0.000000   0.000000     0.000000   0.000000    -0.000000   0.000000   )
 ( -0.000000   0.000000    -0.000000   0.000000    -0.000000   0.000000   )
 ( -0.000000   0.000000     0.000000   0.000000    -0.000000   0.000000   )
 (  0.000000   0.000000     0.000000   0.000000     0.000000   0.000000   )
 ( -0.000000   0.000000    -0.000000   0.000000     0.000000   0.000000   )
 (  0.000000   0.000000    -0.000000   0.000000     0.000000   0.000000   )
 ( -0.000000   0.000000    -0.000000   0.000000     0.000000   0.000000   )
 ( -0.000000   0.000000     0.000000   0.000000     0.000000   0.000000   )
 (  0.000000   0.000000    -0.000000   0.000000     0.000000   0.000000   )
 (  0.000000   0.000000     0.000000   0.000000    -0.000000   0.000000   )
 ( -0.000000   0.000000     0.000000   0.000000    -0.000000   0.000000   )
 ( -0.000000   0.000000    -0.000000   0.000000    -0.000000   0.000000   )
 (  0.000000   0.000000    -0.000000   0.000000    -0.000000   0.000000   )
 ( -0.000000   0.000000     0.000000   0.000000    -0.000000   0.000000   )
 (  0.000000   0.000000     0.000000   0.000000    -0.000000   0.000000   )
 ( -0.000000   0.000000    -0.000000   0.000000    -0.000000   0.000000   )
 (  0.000000   0.000000    -0.000000   0.000000    -0.000000   0.000000   )
 ( -0.000000   0.000000     0.000000   0.000000    -0.000000   0.000000   )
 (  0.000000   0.000000     0.000000   0.000000    -0.000000   0.000000   )
 (  0.000000   0.000000    -0.000000   0.000000    -0.000000   0.000000   )
 ( -0.000000   0.000000    -0.000000   0.000000    -0.000000   0.000000   )
 ( -0.000000   0.000000    -0.000000   0.000000     0.000000   0.000000   )
 (  0.000000   0.000000    -0.000000   0.000000     0.000000   0.000000   )
 ( -0.000000   0.000000     0.000000   0.000000     0.000000   0.000000   )
 (  0.000000   0.000000     0.000000   0.000000     0.000000   0.000000   )
 (  0.000000   0.000000    -0.000000   0.000000     0.000000   0.000000   )
 ( -0.000000   0.000000    -0.000000   0.000000     0.000000   0.000000   )
 ( -0.000000   0.000000    -0.000000   0.000000     0.000000   0.000000   )
 (  0.000000   0.000000     0.000000   0.000000     0.000000   0.000000   )
 ( -0.000000   0.000000     0.000000   0.000000     0.000000   0.000000   )
 (  0.000000   0.000000     0.000000   0.000000     0.000000   0.000000   )
 (  0.000000   0.000000    -0.000000   0.000000     0.000000   0.000000   )
 ( -0.000000   0.000000     0.000000   0.000000     0.000000   0.000000   )
 (  0.000000   0.000000    -0.000000   0.000000     0.000000   0.000000   )
 ( -0.000000   0.000000     0.000000   0.000000     0.000000   0.000000   )
 ( -0.000000   0.000000    -0.000000   0.000000     0.000000   0.000000   )
 (  0.000000   0.000000    -0.000000   0.000000     0.000000   0.000000   )
 ( -0.000000   0.000000    -0.000000   0.000000     0.000000   0.000000   )
 (  0.000000   0.000000     0.000000   0.000000     0.000000   0.000000   )
 ( -0.000000   0.000000    -0.000000   0.000000    -0.000000   0.000000   )
 (  0.000000   0.000000    -0.000000   0.000000    -0.000000   0.000000   )
 (  0.000000   0.000000     0.000000   0.000000    -0.000000   0.000000   )
 ( -0.000000   0.000000     0.000000   0.000000    -0.000000   0.000000   )
 (  0.000000   0.000000    -0.000000   0.000000    -0.000000   0.000000   )
 ( -0.000000   0.000000    -0.000000   0.000000    -0.000000   0.000000   )
 (  0.000000   0.000000    -0.000000   0.000000    -0.000000   0.000000   )
 ( -0.000000   0.000000     0.000000   0.000000    -0.000000   0.000000   )
 (  0.000000   0.000000     0.000000   0.000000    -0.998074   0.000000   )
 ( -0.000000   0.000000    -0.000000   0.000000     0.000000   0.000000   )
 (  0.000000   0.000000    -0.000000   0.000000     0.000000   0.000000   )
 (  0.000000   0.000000     0.000000   0.000000     0.000000   0.000000   )
 ( -0.000000   0.000000    -0.000000   0.000000    -0.000000   0.000000   )
 (  0.000000   0.000000    -0.000000   0.000000    -0.000000   0.000000   )
 (  0.000000   0.000000     0.000000   0.000000    -0.000000   0.000000   )
 (  0.000084   0.000000     0.000048   0.000000     0.000750   0.000000   )
 ( -0.000084   0.000000     0.000048   0.000000     0.000750   0.000000   )
 ( -0.000000   0.000000    -0.000097   0.000000     0.000750   0.000000   )
 **************************************************************************
