# Supplementary material for: Theoretical OH stretching vibrations in dravite
Source: Copernicus journal article supplement (doi:10.5194/ejm-34-239-2022), 2022-04-13
Supplement: Supplementary file 3 [file ejm-34-239-2022-supplement.zip › ejm-2021-65-supplement-version2/supplementary_files/Structure_and_eigendisplacement_files/ideal_dravite/dravite_OH_eigendisplacements_rhomboedral_cell.txt]

This file provides the normalized eigendisplacements of OH stretching modes obtained by diagonalization of the full or partial dynamical matrix of the rhomboedral cell of dravite. 

- Atoms are ordered as in the structure file dravite_P1_rhombohedral.cif. 
- Displacement coordinates are reported in a cartesian reference frame (X,Y,Z) defined such as the coordinates of the rhombohedral lattice vectors a(1), a(2) and a(3) are
               a(1) = (  -0.644286   0.540785   0.540785 )
               a(2) = (   0.540785  -0.644286   0.540785 )
               a(3) = (   0.540785   0.540785  -0.644286 )
- Note that eigendisplacements should be multiplied by the square root of the corresponding atomic mass to obtain the eigenvectors of the dynamical matrix.
  


Eigendisplacements of OH stretching modes from the full dynamical matrix of rhombohedral cell 

     freq (  159) =     109.530026 [THz] =    3653.528412 [cm-1]
 (  0.000040  0.000000  0.000040  0.000000  0.000040  0.000000 ) 
 ( -0.000186  0.000000 -0.000077  0.000000 -0.000077  0.000000 ) 
 ( -0.000077  0.000000 -0.000186  0.000000 -0.000077  0.000000 ) 
 ( -0.000077  0.000000 -0.000077  0.000000 -0.000186  0.000000 ) 
 ( -0.000083  0.000000  0.000021  0.000000 -0.000273  0.000000 ) 
 ( -0.000273  0.000000 -0.000083  0.000000  0.000021  0.000000 ) 
 (  0.000021  0.000000 -0.000273  0.000000 -0.000083  0.000000 ) 
 (  0.000021  0.000000 -0.000083  0.000000 -0.000273  0.000000 ) 
 ( -0.000083  0.000000 -0.000273  0.000000  0.000021  0.000000 ) 
 ( -0.000273  0.000000  0.000021  0.000000 -0.000083  0.000000 ) 
 ( -0.000101  0.000000 -0.000256  0.000000  0.000124  0.000000 ) 
 (  0.000124  0.000000 -0.000101  0.000000 -0.000256  0.000000 ) 
 ( -0.000256  0.000000  0.000124  0.000000 -0.000101  0.000000 ) 
 ( -0.000256  0.000000 -0.000101  0.000000  0.000123  0.000000 ) 
 ( -0.000101  0.000000  0.000123  0.000000 -0.000256  0.000000 ) 
 (  0.000123  0.000000 -0.000256  0.000000 -0.000101  0.000000 ) 
 ( -0.000039  0.000000 -0.000039  0.000000  0.000022  0.000000 ) 
 (  0.000022  0.000000 -0.000039  0.000000 -0.000039  0.000000 ) 
 ( -0.000039  0.000000  0.000022  0.000000 -0.000039  0.000000 ) 
 (  0.000001  0.000000  0.000001  0.000000  0.000001  0.000000 ) 
 (  0.000003  0.000000  0.000003  0.000000 -0.000019  0.000000 ) 
 ( -0.000019  0.000000  0.000003  0.000000  0.000003  0.000000 ) 
 (  0.000003  0.000000 -0.000019  0.000000  0.000003  0.000000 ) 
 ( -0.020440  0.000000 -0.020885  0.000000 -0.020884  0.000000 ) 
 ( -0.020884  0.000000 -0.020440  0.000000 -0.020885  0.000000 ) 
 ( -0.020885  0.000000 -0.020884  0.000000 -0.020440  0.000000 ) 
 (  0.000048  0.000000  0.000049  0.000000 -0.000132  0.000000 ) 
 ( -0.000132  0.000000  0.000048  0.000000  0.000049  0.000000 ) 
 (  0.000049  0.000000 -0.000132  0.000000  0.000048  0.000000 ) 
 (  0.000071  0.000000  0.000324  0.000000  0.000325  0.000000 ) 
 (  0.000325  0.000000  0.000071  0.000000  0.000324  0.000000 ) 
 (  0.000324  0.000000  0.000325  0.000000  0.000071  0.000000 ) 
 (  0.000253  0.000000  0.000101  0.000000  0.000137  0.000000 ) 
 (  0.000137  0.000000  0.000253  0.000000  0.000101  0.000000 ) 
 (  0.000101  0.000000  0.000137  0.000000  0.000253  0.000000 ) 
 (  0.000100  0.000000  0.000253  0.000000  0.000136  0.000000 ) 
 (  0.000253  0.000000  0.000136  0.000000  0.000100  0.000000 ) 
 (  0.000136  0.000000  0.000100  0.000000  0.000253  0.000000 ) 
 (  0.000009  0.000000  0.000166  0.000000 -0.000228  0.000000 ) 
 ( -0.000228  0.000000  0.000009  0.000000  0.000166  0.000000 ) 
 (  0.000166  0.000000 -0.000228  0.000000  0.000009  0.000000 ) 
 (  0.000167  0.000000  0.000009  0.000000 -0.000228  0.000000 ) 
 (  0.000009  0.000000 -0.000228  0.000000  0.000167  0.000000 ) 
 ( -0.000228  0.000000  0.000167  0.000000  0.000009  0.000000 ) 
 (  0.000019  0.000000  0.000021  0.000000  0.000066  0.000000 ) 
 (  0.000066  0.000000  0.000019  0.000000  0.000021  0.000000 ) 
 (  0.000021  0.000000  0.000066  0.000000  0.000019  0.000000 ) 
 (  0.000020  0.000000  0.000020  0.000000  0.000067  0.000000 ) 
 (  0.000020  0.000000  0.000067  0.000000  0.000020  0.000000 ) 
 (  0.000067  0.000000  0.000020  0.000000  0.000020  0.000000 ) 
 (  0.000846  0.000000  0.000846  0.000000  0.000846  0.000000 ) 
 (  0.331222  0.000000  0.333413  0.000000  0.333421  0.000000 ) 
 (  0.333421  0.000000  0.331222  0.000000  0.333413  0.000000 ) 
 (  0.333413  0.000000  0.333421  0.000000  0.331222  0.000000 ) 
     freq (  160) =     109.533189 [THz] =    3653.633918 [cm-1]
 (  0.000040  0.000000 -0.000040  0.000000 -0.000000  0.000000 ) 
 ( -0.000211  0.000000 -0.000057  0.000000 -0.000068  0.000000 ) 
 (  0.000059  0.000000  0.000210  0.000000  0.000067  0.000000 ) 
 ( -0.000010  0.000000  0.000010  0.000000  0.000000  0.000000 ) 
 ( -0.000218  0.000000 -0.000042  0.000000 -0.000348  0.000000 ) 
 (  0.000251  0.000000  0.000151  0.000000  0.000009  0.000000 ) 
 (  0.000033  0.000000  0.000097  0.000000  0.000067  0.000000 ) 
 (  0.000044  0.000000  0.000218  0.000000  0.000348  0.000000 ) 
 ( -0.000151  0.000000 -0.000252  0.000000 -0.000010  0.000000 ) 
 ( -0.000097  0.000000 -0.000034  0.000000 -0.000067  0.000000 ) 
 ( -0.000038  0.000000 -0.000408  0.000000  0.000107  0.000000 ) 
 ( -0.000027  0.000000  0.000119  0.000000  0.000400  0.000000 ) 
 (  0.000008  0.000000 -0.000080  0.000000 -0.000081  0.000000 ) 
 (  0.000408  0.000000  0.000038  0.000000 -0.000107  0.000000 ) 
 ( -0.000120  0.000000  0.000027  0.000000 -0.000400  0.000000 ) 
 (  0.000080  0.000000 -0.000008  0.000000  0.000081  0.000000 ) 
 ( -0.000181  0.000000  0.000182  0.000000 -0.000001  0.000000 ) 
 (  0.000029  0.000000 -0.000018  0.000000 -0.000200  0.000000 ) 
 (  0.000018  0.000000 -0.000028  0.000000  0.000199  0.000000 ) 
 ( -0.000028  0.000000  0.000027  0.000000  0.000000  0.000000 ) 
 (  0.000112  0.000000 -0.000111  0.000000 -0.000001  0.000000 ) 
 ( -0.000016  0.000000 -0.000027  0.000000  0.000087  0.000000 ) 
 (  0.000025  0.000000  0.000017  0.000000 -0.000085  0.000000 ) 
 ( -0.024972  0.000000 -0.025571  0.000000 -0.025599  0.000000 ) 
 (  0.025574  0.000000  0.024972  0.000000  0.025596  0.000000 ) 
 ( -0.000024  0.000000  0.000026  0.000000 -0.000000  0.000000 ) 
 ( -0.000233  0.000000  0.000233  0.000000 -0.000000  0.000000 ) 
 ( -0.000062  0.000000  0.000083  0.000000 -0.000150  0.000000 ) 
 ( -0.000083  0.000000  0.000063  0.000000  0.000150  0.000000 ) 
 (  0.000056  0.000000  0.000460  0.000000  0.000388  0.000000 ) 
 ( -0.000460  0.000000 -0.000056  0.000000 -0.000389  0.000000 ) 
 ( -0.000071  0.000000  0.000071  0.000000  0.000000  0.000000 ) 
 (  0.000247  0.000000  0.000144  0.000000  0.000154  0.000000 ) 
 ( -0.000149  0.000000 -0.000300  0.000000 -0.000173  0.000000 ) 
 (  0.000029  0.000000 -0.000005  0.000000  0.000054  0.000000 ) 
 ( -0.000143  0.000000 -0.000245  0.000000 -0.000153  0.000000 ) 
 (  0.000298  0.000000  0.000148  0.000000  0.000173  0.000000 ) 
 (  0.000005  0.000000 -0.000030  0.000000 -0.000053  0.000000 ) 
 (  0.000030  0.000000  0.000099  0.000000 -0.000120  0.000000 ) 
 ( -0.000025  0.000000 -0.000196  0.000000 -0.000033  0.000000 ) 
 ( -0.000066  0.000000  0.000145  0.000000  0.000167  0.000000 ) 
 ( -0.000100  0.000000 -0.000032  0.000000  0.000120  0.000000 ) 
 (  0.000197  0.000000  0.000023  0.000000  0.000034  0.000000 ) 
 ( -0.000143  0.000000  0.000066  0.000000 -0.000165  0.000000 ) 
 (  0.000095  0.000000 -0.000191  0.000000  0.000030  0.000000 ) 
 ( -0.000014  0.000000  0.000049  0.000000  0.000319  0.000000 ) 
 ( -0.000127  0.000000 -0.000017  0.000000 -0.000145  0.000000 ) 
 (  0.000190  0.000000 -0.000095  0.000000 -0.000031  0.000000 ) 
 ( -0.000047  0.000000  0.000013  0.000000 -0.000316  0.000000 ) 
 (  0.000018  0.000000  0.000126  0.000000  0.000143  0.000000 ) 
 (  0.000698  0.000000 -0.000698  0.000000  0.000000  0.000000 ) 
 (  0.405225  0.000000  0.408474  0.000000  0.408679  0.000000 ) 
 ( -0.408433  0.000000 -0.405225  0.000000 -0.408690  0.000000 ) 
 (  0.000216  0.000000 -0.000246  0.000000  0.000000  0.000000 ) 
     freq (  161) =     109.533189 [THz] =    3653.633918 [cm-1]
 ( -0.000023  0.000000 -0.000023  0.000000  0.000046  0.000000 ) 
 (  0.000121  0.000000  0.000045  0.000000  0.000028  0.000000 ) 
 (  0.000045  0.000000  0.000122  0.000000  0.000027  0.000000 ) 
 ( -0.000072  0.000000 -0.000073  0.000000 -0.000243  0.000000 ) 
 (  0.000049  0.000000 -0.000014  0.000000  0.000089  0.000000 ) 
 (  0.000257  0.000000  0.000165  0.000000  0.000044  0.000000 ) 
 ( -0.000030  0.000000 -0.000345  0.000000 -0.000214  0.000000 ) 
 ( -0.000014  0.000000  0.000049  0.000000  0.000089  0.000000 ) 
 (  0.000164  0.000000  0.000257  0.000000  0.000045  0.000000 ) 
 ( -0.000346  0.000000 -0.000031  0.000000 -0.000213  0.000000 ) 
 (  0.000116  0.000000  0.000226  0.000000  0.000031  0.000000 ) 
 ( -0.000108  0.000000 -0.000025  0.000000  0.000241  0.000000 ) 
 ( -0.000467  0.000000  0.000077  0.000000 -0.000091  0.000000 ) 
 (  0.000226  0.000000  0.000116  0.000000  0.000031  0.000000 ) 
 ( -0.000025  0.000000 -0.000108  0.000000  0.000241  0.000000 ) 
 (  0.000077  0.000000 -0.000467  0.000000 -0.000091  0.000000 ) 
 ( -0.000125  0.000000 -0.000126  0.000000  0.000032  0.000000 ) 
 ( -0.000015  0.000000  0.000219  0.000000 -0.000094  0.000000 ) 
 (  0.000220  0.000000 -0.000017  0.000000 -0.000094  0.000000 ) 
 (  0.000016  0.000000  0.000016  0.000000 -0.000032  0.000000 ) 
 (  0.000034  0.000000  0.000036  0.000000 -0.000019  0.000000 ) 
 (  0.000010  0.000000 -0.000114  0.000000  0.000079  0.000000 ) 
 ( -0.000114  0.000000  0.000009  0.000000  0.000080  0.000000 ) 
 (  0.014418  0.000000  0.014792  0.000000  0.014750  0.000000 ) 
 (  0.014795  0.000000  0.014417  0.000000  0.014750  0.000000 ) 
 ( -0.029542  0.000000 -0.029545  0.000000 -0.028835  0.000000 ) 
 ( -0.000039  0.000000 -0.000039  0.000000 -0.000072  0.000000 ) 
 (  0.000036  0.000000  0.000221  0.000000 -0.000182  0.000000 ) 
 (  0.000221  0.000000  0.000036  0.000000 -0.000183  0.000000 ) 
 ( -0.000033  0.000000 -0.000183  0.000000 -0.000307  0.000000 ) 
 ( -0.000183  0.000000 -0.000032  0.000000 -0.000307  0.000000 ) 
 (  0.000490  0.000000  0.000490  0.000000  0.000065  0.000000 ) 
 ( -0.000204  0.000000 -0.000117  0.000000 -0.000083  0.000000 ) 
 ( -0.000092  0.000000 -0.000112  0.000000 -0.000067  0.000000 ) 
 (  0.000183  0.000000  0.000175  0.000000  0.000316  0.000000 ) 
 ( -0.000117  0.000000 -0.000202  0.000000 -0.000083  0.000000 ) 
 ( -0.000111  0.000000 -0.000091  0.000000 -0.000065  0.000000 ) 
 (  0.000174  0.000000  0.000182  0.000000  0.000314  0.000000 ) 
 ( -0.000210  0.000000  0.000020  0.000000 -0.000099  0.000000 ) 
 (  0.000153  0.000000  0.000079  0.000000 -0.000096  0.000000 ) 
 (  0.000076  0.000000 -0.000054  0.000000  0.000130  0.000000 ) 
 (  0.000019  0.000000 -0.000209  0.000000 -0.000096  0.000000 ) 
 (  0.000077  0.000000  0.000152  0.000000 -0.000096  0.000000 ) 
 ( -0.000056  0.000000  0.000077  0.000000  0.000132  0.000000 ) 
 (  0.000112  0.000000  0.000258  0.000000  0.000002  0.000000 ) 
 ( -0.000027  0.000000 -0.000139  0.000000  0.000037  0.000000 ) 
 ( -0.000294  0.000000  0.000025  0.000000  0.000026  0.000000 ) 
 (  0.000255  0.000000  0.000110  0.000000  0.000003  0.000000 ) 
 ( -0.000138  0.000000 -0.000028  0.000000  0.000037  0.000000 ) 
 (  0.000025  0.000000 -0.000292  0.000000  0.000028  0.000000 ) 
 ( -0.000403  0.000000 -0.000403  0.000000  0.000806  0.000000 ) 
 ( -0.233957  0.000000 -0.236082  0.000000 -0.235667  0.000000 ) 
 ( -0.236093  0.000000 -0.233957  0.000000 -0.235708  0.000000 ) 
 (  0.471790  0.000000  0.471760  0.000000  0.467914  0.000000 ) 
     freq (  162) =     115.600015 [THz] =    3856.001453 [cm-1]
 (  0.000235  0.000000  0.000235  0.000000  0.000235  0.000000 ) 
 ( -0.000077  0.000000  0.000155  0.000000  0.000155  0.000000 ) 
 (  0.000155  0.000000 -0.000077  0.000000  0.000155  0.000000 ) 
 (  0.000155  0.000000  0.000155  0.000000 -0.000077  0.000000 ) 
 (  0.000026  0.000000  0.000006  0.000000 -0.000002  0.000000 ) 
 ( -0.000002  0.000000  0.000026  0.000000  0.000006  0.000000 ) 
 (  0.000006  0.000000 -0.000002  0.000000  0.000026  0.000000 ) 
 (  0.000006  0.000000  0.000026  0.000000 -0.000002  0.000000 ) 
 (  0.000026  0.000000 -0.000002  0.000000  0.000006  0.000000 ) 
 ( -0.000002  0.000000  0.000006  0.000000  0.000026  0.000000 ) 
 ( -0.000073  0.000000 -0.000058  0.000000 -0.000046  0.000000 ) 
 ( -0.000046  0.000000 -0.000073  0.000000 -0.000058  0.000000 ) 
 ( -0.000058  0.000000 -0.000046  0.000000 -0.000073  0.000000 ) 
 ( -0.000058  0.000000 -0.000073  0.000000 -0.000046  0.000000 ) 
 ( -0.000073  0.000000 -0.000046  0.000000 -0.000058  0.000000 ) 
 ( -0.000046  0.000000 -0.000058  0.000000 -0.000073  0.000000 ) 
 ( -0.000020  0.000000 -0.000019  0.000000  0.000102  0.000000 ) 
 (  0.000102  0.000000 -0.000020  0.000000 -0.000019  0.000000 ) 
 ( -0.000019  0.000000  0.000102  0.000000 -0.000020  0.000000 ) 
 (  0.035821  0.000000  0.035821  0.000000  0.035821  0.000000 ) 
 ( -0.000024  0.000000 -0.000025  0.000000 -0.000108  0.000000 ) 
 ( -0.000108  0.000000 -0.000024  0.000000 -0.000025  0.000000 ) 
 ( -0.000025  0.000000 -0.000108  0.000000 -0.000024  0.000000 ) 
 ( -0.000043  0.000000 -0.000032  0.000000 -0.000031  0.000000 ) 
 ( -0.000031  0.000000 -0.000043  0.000000 -0.000032  0.000000 ) 
 ( -0.000032  0.000000 -0.000031  0.000000 -0.000043  0.000000 ) 
 (  0.000074  0.000000  0.000074  0.000000  0.000046  0.000000 ) 
 (  0.000046  0.000000  0.000074  0.000000  0.000074  0.000000 ) 
 (  0.000074  0.000000  0.000046  0.000000  0.000074  0.000000 ) 
 (  0.000094  0.000000  0.000039  0.000000  0.000039  0.000000 ) 
 (  0.000039  0.000000  0.000094  0.000000  0.000039  0.000000 ) 
 (  0.000039  0.000000  0.000039  0.000000  0.000094  0.000000 ) 
 ( -0.000057  0.000000  0.000013  0.000000  0.000077  0.000000 ) 
 (  0.000077  0.000000 -0.000057  0.000000  0.000013  0.000000 ) 
 (  0.000013  0.000000  0.000077  0.000000 -0.000057  0.000000 ) 
 (  0.000013  0.000000 -0.000058  0.000000  0.000077  0.000000 ) 
 ( -0.000058  0.000000  0.000077  0.000000  0.000013  0.000000 ) 
 (  0.000077  0.000000  0.000013  0.000000 -0.000058  0.000000 ) 
 (  0.000026  0.000000  0.000002  0.000000 -0.000008  0.000000 ) 
 ( -0.000008  0.000000  0.000026  0.000000  0.000002  0.000000 ) 
 (  0.000002  0.000000 -0.000008  0.000000  0.000026  0.000000 ) 
 (  0.000002  0.000000  0.000026  0.000000 -0.000008  0.000000 ) 
 (  0.000026  0.000000 -0.000008  0.000000  0.000002  0.000000 ) 
 ( -0.000008  0.000000  0.000002  0.000000  0.000026  0.000000 ) 
 (  0.000013  0.000000 -0.000005  0.000000 -0.000022  0.000000 ) 
 ( -0.000022  0.000000  0.000013  0.000000 -0.000005  0.000000 ) 
 ( -0.000005  0.000000 -0.000022  0.000000  0.000013  0.000000 ) 
 ( -0.000005  0.000000  0.000013  0.000000 -0.000022  0.000000 ) 
 (  0.000013  0.000000 -0.000022  0.000000 -0.000005  0.000000 ) 
 ( -0.000022  0.000000 -0.000005  0.000000  0.000013  0.000000 ) 
 ( -0.576237  0.000000 -0.576237  0.000000 -0.576237  0.000000 ) 
 (  0.000403  0.000000  0.000477  0.000000  0.000476  0.000000 ) 
 (  0.000476  0.000000  0.000403  0.000000  0.000477  0.000000 ) 
 (  0.000477  0.000000  0.000476  0.000000  0.000403  0.000000 ) 
 **************************************************************************


 Eigendisplacements of OH stretching modes from dynamical matrix restricted to the 4 OH groups of the hexagonal cell 


      freq (  159) =     109.527033 [THz] =    3653.428559 [cm-1]
 ( -0.000000   0.000000    -0.000000   0.000000    -0.000000   0.000000   )
 (  0.000000   0.000000     0.000000   0.000000     0.000000   0.000000   )
 (  0.000000   0.000000     0.000000   0.000000     0.000000   0.000000   )
 (  0.000000   0.000000     0.000000   0.000000     0.000000   0.000000   )
 (  0.000000   0.000000    -0.000000   0.000000     0.000000   0.000000   )
 (  0.000000   0.000000     0.000000   0.000000    -0.000000   0.000000   )
 ( -0.000000   0.000000     0.000000   0.000000     0.000000   0.000000   )
 ( -0.000000   0.000000     0.000000   0.000000     0.000000   0.000000   )
 (  0.000000   0.000000     0.000000   0.000000    -0.000000   0.000000   )
 (  0.000000   0.000000    -0.000000   0.000000     0.000000   0.000000   )
 (  0.000000   0.000000     0.000000   0.000000    -0.000000   0.000000   )
 ( -0.000000   0.000000     0.000000   0.000000     0.000000   0.000000   )
 (  0.000000   0.000000    -0.000000   0.000000     0.000000   0.000000   )
 (  0.000000   0.000000     0.000000   0.000000    -0.000000   0.000000   )
 (  0.000000   0.000000    -0.000000   0.000000     0.000000   0.000000   )
 ( -0.000000   0.000000     0.000000   0.000000     0.000000   0.000000   )
 (  0.000000   0.000000     0.000000   0.000000    -0.000000   0.000000   )
 ( -0.000000   0.000000     0.000000   0.000000     0.000000   0.000000   )
 (  0.000000   0.000000    -0.000000   0.000000     0.000000   0.000000   )
 ( -0.000000   0.000000    -0.000000   0.000000    -0.000000   0.000000   )
 ( -0.000000   0.000000    -0.000000   0.000000     0.000000   0.000000   )
 (  0.000000   0.000000    -0.000000   0.000000    -0.000000   0.000000   )
 ( -0.000000   0.000000     0.000000   0.000000    -0.000000   0.000000   )
 (  0.020441   0.000000     0.020885   0.000000     0.020885   0.000000   )
 (  0.020885   0.000000     0.020441   0.000000     0.020885   0.000000   )
 (  0.020885   0.000000     0.020885   0.000000     0.020441   0.000000   )
 ( -0.000000   0.000000    -0.000000   0.000000     0.000000   0.000000   )
 (  0.000000   0.000000    -0.000000   0.000000    -0.000000   0.000000   )
 ( -0.000000   0.000000     0.000000   0.000000    -0.000000   0.000000   )
 ( -0.000000   0.000000    -0.000000   0.000000    -0.000000   0.000000   )
 ( -0.000000   0.000000    -0.000000   0.000000    -0.000000   0.000000   )
 ( -0.000000   0.000000    -0.000000   0.000000    -0.000000   0.000000   )
 ( -0.000000   0.000000    -0.000000   0.000000    -0.000000   0.000000   )
 ( -0.000000   0.000000    -0.000000   0.000000    -0.000000   0.000000   )
 ( -0.000000   0.000000    -0.000000   0.000000    -0.000000   0.000000   )
 ( -0.000000   0.000000    -0.000000   0.000000    -0.000000   0.000000   )
 ( -0.000000   0.000000    -0.000000   0.000000    -0.000000   0.000000   )
 ( -0.000000   0.000000    -0.000000   0.000000    -0.000000   0.000000   )
 ( -0.000000   0.000000    -0.000000   0.000000     0.000000   0.000000   )
 (  0.000000   0.000000    -0.000000   0.000000    -0.000000   0.000000   )
 ( -0.000000   0.000000     0.000000   0.000000    -0.000000   0.000000   )
 ( -0.000000   0.000000    -0.000000   0.000000     0.000000   0.000000   )
 ( -0.000000   0.000000     0.000000   0.000000    -0.000000   0.000000   )
 (  0.000000   0.000000    -0.000000   0.000000    -0.000000   0.000000   )
 ( -0.000000   0.000000    -0.000000   0.000000    -0.000000   0.000000   )
 ( -0.000000   0.000000    -0.000000   0.000000    -0.000000   0.000000   )
 ( -0.000000   0.000000    -0.000000   0.000000    -0.000000   0.000000   )
 ( -0.000000   0.000000    -0.000000   0.000000    -0.000000   0.000000   )
 ( -0.000000   0.000000    -0.000000   0.000000    -0.000000   0.000000   )
 ( -0.000000   0.000000    -0.000000   0.000000    -0.000000   0.000000   )
 ( -0.000825   0.000000    -0.000825   0.000000    -0.000825   0.000000   )
 ( -0.331236   0.000000    -0.333406   0.000000    -0.333415   0.000000   )
 ( -0.333415   0.000000    -0.331236   0.000000    -0.333406   0.000000   )
 ( -0.333406   0.000000    -0.333415   0.000000    -0.331236   0.000000   )
     freq (  160) =     109.529637 [THz] =    3653.515416 [cm-1]
 ( -0.000000   0.000000    -0.000000   0.000000     0.000000   0.000000   )
 (  0.000000   0.000000     0.000000   0.000000     0.000000   0.000000   )
 (  0.000000   0.000000     0.000000   0.000000    -0.000000   0.000000   )
 ( -0.000000   0.000000    -0.000000   0.000000    -0.000000   0.000000   )
 (  0.000000   0.000000     0.000000   0.000000     0.000000   0.000000   )
 (  0.000000   0.000000     0.000000   0.000000     0.000000   0.000000   )
 ( -0.000000   0.000000    -0.000000   0.000000    -0.000000   0.000000   )
 ( -0.000000   0.000000    -0.000000   0.000000    -0.000000   0.000000   )
 (  0.000000   0.000000     0.000000   0.000000     0.000000   0.000000   )
 ( -0.000000   0.000000    -0.000000   0.000000    -0.000000   0.000000   )
 (  0.000000   0.000000     0.000000   0.000000    -0.000000   0.000000   )
 ( -0.000000   0.000000    -0.000000   0.000000     0.000000   0.000000   )
 ( -0.000000   0.000000     0.000000   0.000000    -0.000000   0.000000   )
 (  0.000000   0.000000     0.000000   0.000000     0.000000   0.000000   )
 (  0.000000   0.000000    -0.000000   0.000000     0.000000   0.000000   )
 (  0.000000   0.000000    -0.000000   0.000000    -0.000000   0.000000   )
 ( -0.000000   0.000000    -0.000000   0.000000     0.000000   0.000000   )
 ( -0.000000   0.000000     0.000000   0.000000     0.000000   0.000000   )
 (  0.000000   0.000000    -0.000000   0.000000    -0.000000   0.000000   )
 (  0.000027   0.000000     0.000001   0.000000    -0.000029   0.000000   )
 ( -0.000000   0.000000     0.000000   0.000000    -0.000000   0.000000   )
 (  0.000000   0.000000    -0.000000   0.000000     0.000000   0.000000   )
 ( -0.000000   0.000000    -0.000000   0.000000     0.000000   0.000000   )
 (  0.024456   0.000000     0.025068   0.000000     0.025044   0.000000   )
 (  0.001055   0.000000     0.001005   0.000000     0.001005   0.000000   )
 ( -0.026073   0.000000    -0.026099   0.000000    -0.025461   0.000000   )
 (  0.000000   0.000000    -0.000000   0.000000    -0.000000   0.000000   )
 (  0.000000   0.000000     0.000000   0.000000    -0.000000   0.000000   )
 (  0.000000   0.000000     0.000000   0.000000    -0.000000   0.000000   )
 ( -0.000000   0.000000    -0.000000   0.000000    -0.000000   0.000000   )
 (  0.000000   0.000000    -0.000000   0.000000    -0.000000   0.000000   )
 (  0.000000   0.000000     0.000000   0.000000     0.000000   0.000000   )
 ( -0.000000   0.000000    -0.000000   0.000000    -0.000000   0.000000   )
 ( -0.000000   0.000000     0.000000   0.000000     0.000000   0.000000   )
 (  0.000000   0.000000     0.000000   0.000000     0.000000   0.000000   )
 ( -0.000000   0.000000    -0.000000   0.000000     0.000000   0.000000   )
 ( -0.000000   0.000000    -0.000000   0.000000    -0.000000   0.000000   )
 (  0.000000   0.000000     0.000000   0.000000     0.000000   0.000000   )
 ( -0.000000   0.000000    -0.000000   0.000000    -0.000000   0.000000   )
 (  0.000000   0.000000     0.000000   0.000000    -0.000000   0.000000   )
 (  0.000000   0.000000    -0.000000   0.000000     0.000000   0.000000   )
 (  0.000000   0.000000    -0.000000   0.000000    -0.000000   0.000000   )
 ( -0.000000   0.000000     0.000000   0.000000    -0.000000   0.000000   )
 (  0.000000   0.000000     0.000000   0.000000     0.000000   0.000000   )
 (  0.000000   0.000000     0.000000   0.000000    -0.000000   0.000000   )
 ( -0.000000   0.000000    -0.000000   0.000000    -0.000000   0.000000   )
 ( -0.000000   0.000000     0.000000   0.000000     0.000000   0.000000   )
 (  0.000000   0.000000     0.000000   0.000000     0.000000   0.000000   )
 ( -0.000000   0.000000    -0.000000   0.000000     0.000000   0.000000   )
 (  0.000000   0.000000    -0.000000   0.000000    -0.000000   0.000000   )
 ( -0.000670   0.000000    -0.000027   0.000000     0.000698   0.000000   )
 ( -0.396842   0.000000    -0.400217   0.000000    -0.399956   0.000000   )
 ( -0.016675   0.000000    -0.016306   0.000000    -0.016233   0.000000   )
 (  0.416450   0.000000     0.416631   0.000000     0.413148   0.000000   )
     freq (  161) =     109.529637 [THz] =    3653.515416 [cm-1]
 (  0.000000   0.000000    -0.000000   0.000000     0.000000   0.000000   )
 ( -0.000000   0.000000    -0.000000   0.000000    -0.000000   0.000000   )
 (  0.000000   0.000000     0.000000   0.000000     0.000000   0.000000   )
 ( -0.000000   0.000000    -0.000000   0.000000    -0.000000   0.000000   )
 ( -0.000000   0.000000    -0.000000   0.000000    -0.000000   0.000000   )
 (  0.000000   0.000000     0.000000   0.000000     0.000000   0.000000   )
 (  0.000000   0.000000    -0.000000   0.000000    -0.000000   0.000000   )
 (  0.000000   0.000000     0.000000   0.000000     0.000000   0.000000   )
 ( -0.000000   0.000000    -0.000000   0.000000     0.000000   0.000000   )
 ( -0.000000   0.000000    -0.000000   0.000000    -0.000000   0.000000   )
 (  0.000000   0.000000    -0.000000   0.000000     0.000000   0.000000   )
 ( -0.000000   0.000000     0.000000   0.000000     0.000000   0.000000   )
 ( -0.000000   0.000000    -0.000000   0.000000    -0.000000   0.000000   )
 (  0.000000   0.000000     0.000000   0.000000    -0.000000   0.000000   )
 ( -0.000000   0.000000    -0.000000   0.000000    -0.000000   0.000000   )
 (  0.000000   0.000000    -0.000000   0.000000     0.000000   0.000000   )
 ( -0.000000   0.000000     0.000000   0.000000     0.000000   0.000000   )
 (  0.000000   0.000000     0.000000   0.000000    -0.000000   0.000000   )
 (  0.000000   0.000000    -0.000000   0.000000     0.000000   0.000000   )
 ( -0.000017   0.000000     0.000032   0.000000    -0.000015   0.000000   )
 (  0.000000   0.000000    -0.000000   0.000000    -0.000000   0.000000   )
 ( -0.000000   0.000000    -0.000000   0.000000     0.000000   0.000000   )
 ( -0.000000   0.000000     0.000000   0.000000    -0.000000   0.000000   )
 ( -0.015280   0.000000    -0.015633   0.000000    -0.015678   0.000000   )
 (  0.029527   0.000000     0.028820   0.000000     0.029526   0.000000   )
 ( -0.013893   0.000000    -0.013850   0.000000    -0.013540   0.000000   )
 ( -0.000000   0.000000     0.000000   0.000000    -0.000000   0.000000   )
 ( -0.000000   0.000000     0.000000   0.000000    -0.000000   0.000000   )
 (  0.000000   0.000000     0.000000   0.000000     0.000000   0.000000   )
 (  0.000000   0.000000     0.000000   0.000000     0.000000   0.000000   )
 ( -0.000000   0.000000    -0.000000   0.000000    -0.000000   0.000000   )
 (  0.000000   0.000000     0.000000   0.000000     0.000000   0.000000   )
 (  0.000000   0.000000     0.000000   0.000000     0.000000   0.000000   )
 ( -0.000000   0.000000    -0.000000   0.000000    -0.000000   0.000000   )
 (  0.000000   0.000000     0.000000   0.000000     0.000000   0.000000   )
 ( -0.000000   0.000000    -0.000000   0.000000    -0.000000   0.000000   )
 (  0.000000   0.000000     0.000000   0.000000     0.000000   0.000000   )
 (  0.000000   0.000000     0.000000   0.000000     0.000000   0.000000   )
 ( -0.000000   0.000000     0.000000   0.000000    -0.000000   0.000000   )
 (  0.000000   0.000000    -0.000000   0.000000    -0.000000   0.000000   )
 ( -0.000000   0.000000     0.000000   0.000000     0.000000   0.000000   )
 ( -0.000000   0.000000    -0.000000   0.000000     0.000000   0.000000   )
 (  0.000000   0.000000     0.000000   0.000000    -0.000000   0.000000   )
 ( -0.000000   0.000000     0.000000   0.000000    -0.000000   0.000000   )
 (  0.000000   0.000000    -0.000000   0.000000     0.000000   0.000000   )
 ( -0.000000   0.000000    -0.000000   0.000000     0.000000   0.000000   )
 ( -0.000000   0.000000    -0.000000   0.000000    -0.000000   0.000000   )
 (  0.000000   0.000000    -0.000000   0.000000    -0.000000   0.000000   )
 ( -0.000000   0.000000    -0.000000   0.000000    -0.000000   0.000000   )
 (  0.000000   0.000000    -0.000000   0.000000     0.000000   0.000000   )
 (  0.000419   0.000000    -0.000790   0.000000     0.000371   0.000000   )
 (  0.247945   0.000000     0.249810   0.000000     0.250170   0.000000   )
 ( -0.471457   0.000000    -0.467648   0.000000    -0.471503   0.000000   )
 (  0.221693   0.000000     0.221287   0.000000     0.219703   0.000000   )
     freq (  162) =     115.599332 [THz] =    3855.978664 [cm-1]
 (  0.000000   0.000000     0.000000   0.000000     0.000000   0.000000   )
 ( -0.000000   0.000000     0.000000   0.000000     0.000000   0.000000   )
 (  0.000000   0.000000    -0.000000   0.000000     0.000000   0.000000   )
 (  0.000000   0.000000     0.000000   0.000000    -0.000000   0.000000   )
 (  0.000000   0.000000     0.000000   0.000000    -0.000000   0.000000   )
 ( -0.000000   0.000000     0.000000   0.000000     0.000000   0.000000   )
 (  0.000000   0.000000    -0.000000   0.000000     0.000000   0.000000   )
 (  0.000000   0.000000     0.000000   0.000000    -0.000000   0.000000   )
 (  0.000000   0.000000    -0.000000   0.000000     0.000000   0.000000   )
 ( -0.000000   0.000000     0.000000   0.000000     0.000000   0.000000   )
 ( -0.000000   0.000000    -0.000000   0.000000    -0.000000   0.000000   )
 ( -0.000000   0.000000    -0.000000   0.000000    -0.000000   0.000000   )
 ( -0.000000   0.000000    -0.000000   0.000000    -0.000000   0.000000   )
 ( -0.000000   0.000000    -0.000000   0.000000    -0.000000   0.000000   )
 ( -0.000000   0.000000    -0.000000   0.000000    -0.000000   0.000000   )
 ( -0.000000   0.000000    -0.000000   0.000000    -0.000000   0.000000   )
 ( -0.000000   0.000000    -0.000000   0.000000     0.000000   0.000000   )
 (  0.000000   0.000000    -0.000000   0.000000    -0.000000   0.000000   )
 ( -0.000000   0.000000     0.000000   0.000000    -0.000000   0.000000   )
 (  0.035822   0.000000     0.035822   0.000000     0.035822   0.000000   )
 ( -0.000000   0.000000    -0.000000   0.000000    -0.000000   0.000000   )
 ( -0.000000   0.000000    -0.000000   0.000000    -0.000000   0.000000   )
 ( -0.000000   0.000000    -0.000000   0.000000    -0.000000   0.000000   )
 ( -0.000042   0.000000    -0.000031   0.000000    -0.000030   0.000000   )
 ( -0.000030   0.000000    -0.000042   0.000000    -0.000031   0.000000   )
 ( -0.000031   0.000000    -0.000030   0.000000    -0.000042   0.000000   )
 (  0.000000   0.000000     0.000000   0.000000     0.000000   0.000000   )
 (  0.000000   0.000000     0.000000   0.000000     0.000000   0.000000   )
 (  0.000000   0.000000     0.000000   0.000000     0.000000   0.000000   )
 (  0.000000   0.000000     0.000000   0.000000     0.000000   0.000000   )
 (  0.000000   0.000000     0.000000   0.000000     0.000000   0.000000   )
 (  0.000000   0.000000     0.000000   0.000000     0.000000   0.000000   )
 ( -0.000000   0.000000     0.000000   0.000000     0.000000   0.000000   )
 (  0.000000   0.000000    -0.000000   0.000000     0.000000   0.000000   )
 (  0.000000   0.000000     0.000000   0.000000    -0.000000   0.000000   )
 (  0.000000   0.000000    -0.000000   0.000000     0.000000   0.000000   )
 ( -0.000000   0.000000     0.000000   0.000000     0.000000   0.000000   )
 (  0.000000   0.000000     0.000000   0.000000    -0.000000   0.000000   )
 (  0.000000   0.000000     0.000000   0.000000    -0.000000   0.000000   )
 ( -0.000000   0.000000     0.000000   0.000000     0.000000   0.000000   )
 (  0.000000   0.000000    -0.000000   0.000000     0.000000   0.000000   )
 (  0.000000   0.000000     0.000000   0.000000    -0.000000   0.000000   )
 (  0.000000   0.000000    -0.000000   0.000000     0.000000   0.000000   )
 ( -0.000000   0.000000     0.000000   0.000000     0.000000   0.000000   )
 (  0.000000   0.000000    -0.000000   0.000000    -0.000000   0.000000   )
 ( -0.000000   0.000000     0.000000   0.000000    -0.000000   0.000000   )
 ( -0.000000   0.000000    -0.000000   0.000000     0.000000   0.000000   )
 ( -0.000000   0.000000     0.000000   0.000000    -0.000000   0.000000   )
 (  0.000000   0.000000    -0.000000   0.000000    -0.000000   0.000000   )
 ( -0.000000   0.000000    -0.000000   0.000000     0.000000   0.000000   )
 ( -0.576237   0.000000    -0.576237   0.000000    -0.576237   0.000000   )
 (  0.000397   0.000000     0.000465   0.000000     0.000464   0.000000   )
 (  0.000464   0.000000     0.000397   0.000000     0.000465   0.000000   )
 (  0.000465   0.000000     0.000464   0.000000     0.000397   0.000000   )
 **************************************************************************
