# Supplementary material for: Theoretical OH stretching vibrations in dravite
Source: Copernicus journal article supplement (doi:10.5194/ejm-34-239-2022), 2022-04-13
Supplement: Supplementary file 3 [file ejm-34-239-2022-supplement.zip › ejm-2021-65-supplement-version2/supplementary_files/Structure_and_eigendisplacement_files/ideal_dravite/dravite_P1_hexagonal.cif]

#======================================================================

# CRYSTAL DATA

#----------------------------------------------------------------------

data_VESTA_phase_1


_pd_phase_name                         
_cell_length_a 16.1067867
_cell_length_b 16.1067867
_cell_length_c 7.27903080
_cell_angle_alpha                      90
_cell_angle_beta                       90
_cell_angle_gamma                      120
_symmetry_space_group_name_H-M         'P1'
_symmetry_Int_Tables_number            1

loop_
_symmetry_equiv_pos_as_xyz
   'x, y, z'

loop_
   _atom_site_label
   _atom_site_fract_x
   _atom_site_fract_y
   _atom_site_fract_z
Na       0.000000000   0.000000000   0.276367594
Na       0.666667000   0.333333000   0.609700927
Na       0.333333000   0.666667000   0.943034262
Mg       0.126599634   0.063299838   0.646190346
Mg       0.936700162   0.063299796   0.646190346
Mg       0.936700204   0.873400366   0.646190346
Mg       0.793266633   0.396632837   0.979523683
Mg       0.603367163   0.396632795   0.979523683
Mg       0.603367205   0.206733367   0.979523683
Mg       0.459932635   0.729966838   0.312857012
Mg       0.270033162   0.729966797   0.312857012
Mg       0.270033203   0.540067365   0.312857012
Al       0.298500602   0.261741504   0.632827689
Al       0.738258496   0.036759098   0.632827689
Al       0.963240902   0.701499398   0.632827689
Al       0.738258628   0.701499457   0.632827693
Al       0.963240829   0.261741372   0.632827693
Al       0.298500543   0.036759171   0.632827693
Al       0.965167602   0.595074504   0.966161024
Al       0.404925496   0.370092097   0.966161024
Al       0.629907903   0.034832398   0.966161024
Al       0.404925628   0.034832457   0.966161028
Al       0.629907829   0.595074372   0.966161028
Al       0.965167543   0.370092171   0.966161028
Al       0.631833601   0.928408504   0.299494352
Al       0.071591496   0.703426097   0.299494352
Al       0.296573903   0.368166399   0.299494352
Al       0.071591628   0.368166457   0.299494355
Al       0.296573830   0.928408372   0.299494355
Al       0.631833543   0.703426170   0.299494355
Si       0.192629318   0.190733226   0.016565300
Si       0.809266774   0.001896091   0.016565300
Si       0.998103909   0.807370682   0.016565300
Si       0.809267295   0.807371256   0.016565605
Si       0.998103961   0.190732705   0.016565605
Si       0.192628744   0.001896039   0.016565605
Si       0.859296315   0.524066224   0.349898625
Si       0.475933776   0.335229091   0.349898625
Si       0.664770909   0.140703685   0.349898625
Si       0.475934297   0.140704259   0.349898930
Si       0.664770961   0.524065703   0.349898930
Si       0.859295741   0.335229039   0.349898930
Si       0.525962318   0.857400226   0.683231973
Si       0.142599774   0.668563092   0.683231973
Si       0.331436908   0.474037682   0.683231973
Si       0.142600296   0.474038257   0.683232279
Si       0.331436961   0.857399704   0.683232279
Si       0.525961743   0.668563039   0.683232279
B        0.110092015   0.220183547   0.473991865
B        0.779816453   0.889908468   0.473991865
B        0.110091532   0.889907985   0.473991865
B        0.776759017   0.553516550   0.807325199
B        0.446483450   0.223241467   0.807325199
B        0.776758533   0.223240983   0.807325199
B        0.443425020   0.886850555   0.140658530
B        0.113149445   0.556575464   0.140658530
B        0.443424536   0.556574980   0.140658530
O        0.000000000   0.000000000   0.793714530
O        0.666667000   0.333333000   0.127047741
O        0.333333000   0.666667000   0.460381257
O        0.061877052   0.123754150   0.497940489
O        0.876245850   0.938122902   0.497940489
O        0.061877098   0.938122948   0.497940489
O        0.728544051   0.457087147   0.831273824
O        0.542912853   0.271455903   0.831273824
O        0.728544097   0.271455949   0.831273824
O        0.395210049   0.790421144   0.164607158
O        0.209578856   0.604789905   0.164607158
O        0.395210095   0.604789951   0.164607158
O        0.270473796   0.135236839   0.532544516
O        0.864763161   0.135236958   0.532544516
O        0.864763042   0.729526204   0.532544516
O        0.937140796   0.468569838   0.865877788
O        0.531430162   0.468569958   0.865877788
O        0.531430042   0.062859204   0.865877788
O        0.603806796   0.801903838   0.199211263
O        0.198096162   0.801903958   0.199211263
O        0.198096042   0.396193204   0.199211263
O        0.092287835   0.184576232   0.086062438
O        0.815423768   0.907711603   0.086062438
O        0.092288397   0.907712165   0.086062438
O        0.758954836   0.517909233   0.419395773
O        0.482090767   0.241044603   0.419395773
O        0.758955397   0.241045164   0.419395773
O        0.425620836   0.851243232   0.752729105
O        0.148756768   0.574378603   0.752729105
O        0.425621397   0.574379164   0.752729105
O        0.185859905   0.092929741   0.107773295
O        0.907070259   0.092930164   0.107773295
O        0.907069836   0.814140095   0.107773295
O        0.852526905   0.426262741   0.441106630
O        0.573737259   0.426263164   0.441106630
O        0.573736836   0.147473095   0.441106630
O        0.519192905   0.759596740   0.774439960
O        0.240403260   0.759597164   0.774439960
O        0.240402836   0.480807095   0.774439960
O        0.198970357   0.189570221   0.795238571
O        0.810429779   0.009400136   0.795238571
O        0.990599864   0.801029643   0.795238571
O        0.810429690   0.801029568   0.795238417
O        0.990599877   0.189570310   0.795238417
O        0.198970432   0.009400123   0.795238417
O        0.865637356   0.522903222   0.128571912
O        0.477096778   0.342733134   0.128571912
O        0.657266866   0.134362644   0.128571912
O        0.477096690   0.134362568   0.128571758
O        0.657266878   0.522903310   0.128571758
O        0.865637432   0.342733122   0.128571758
O        0.532303357   0.856237221   0.461905234
O        0.143762779   0.676067136   0.461905234
O        0.323932864   0.467696643   0.461905234
O        0.143762690   0.467696567   0.461905079
O        0.323932877   0.856237310   0.461905079
O        0.532303433   0.676067123   0.461905079
O        0.284993400   0.286070319   0.100813089
O        0.713929681  -0.001076919   0.100813089
O        1.001076919   0.715006600   0.100813089
O        0.713929420   0.715006352   0.100813298
O        1.001076931   0.286070580   0.100813298
O        0.284993648  -0.001076931   0.100813298
O        0.951660402   0.619403321   0.434146424
O        0.380596679   0.332256081   0.434146424
O        0.667743919   0.048339598   0.434146424
O        0.380596418   0.048339349   0.434146634
O        0.667743931   0.619403582   0.434146634
O        0.951660651   0.332256069   0.434146634
O        0.618326400   0.952737319   0.767479754
O        0.047262681   0.665590081   0.767479754
O        0.334409919   0.381673600   0.767479754
O        0.047262420   0.381673352   0.767479963
O        0.334409932   0.952737580   0.767479963
O        0.618326648   0.665590068   0.767479963
O        0.210397540   0.271226060   0.462740837
O        0.728773940   0.939171479   0.462740837
O        0.060828521   0.789602460   0.462740837
O        0.728773759   0.789602081   0.462740799
O        0.060828323   0.271226241   0.462740799
O        0.210397919   0.939171677   0.462740799
O        0.877064539   0.604559059   0.796074171
O        0.395440941   0.272504480   0.796074171
O        0.727495520   0.122935461   0.796074171
O        0.395440759   0.122935081   0.796074132
O        0.727495322   0.604559241   0.796074132
O        0.877064919   0.272504678   0.796074132
O        0.543730538   0.937893058   0.129407507
O        0.062106942   0.605838479   0.129407507
O        0.394161521   0.456269462   0.129407507
O        0.062106760   0.456269083   0.129407468
O        0.394161322   0.937893240   0.129407468
O        0.543730917   0.605838678   0.129407468
H        0.000000000   0.000000000   0.925444857
H        0.666667000   0.333333000   0.258778306
H        0.333333000   0.666667000   0.592111469
H        0.269467200   0.134733612   0.398976752
H        0.865266388   0.134733588   0.398976752
H        0.865266412   0.730532800   0.398976752
H        0.936134200   0.468066612   0.732310142
H        0.531933388   0.468066588   0.732310142
H        0.531933412   0.063865800   0.732310142
H        0.602800199   0.801400611   0.065643347
H        0.198599389   0.801400588   0.065643347
H        0.198599412   0.397199801   0.065643347
