# Supplementary material for: Theoretical OH stretching vibrations in dravite
Source: Copernicus journal article supplement (doi:10.5194/ejm-34-239-2022), 2022-04-13
Supplement: Supplementary file 3 [file ejm-34-239-2022-supplement.zip › ejm-2021-65-supplement-version2/supplementary_files/Structure_and_eigendisplacement_files/ideal_dravite/dravite_P1_rhombohedral.cif]

#======================================================================

# CRYSTAL DATA

#----------------------------------------------------------------------

data_VESTA_phase_1


_pd_phase_name                         'Na.46 Ca.3 Al7.83 Li.9 Si5.58 B3.42 F.'
_cell_length_a                         9.61059
_cell_length_b                         9.61059
_cell_length_c                         9.61059
_cell_angle_alpha                      113.85300
_cell_angle_beta                       113.85300
_cell_angle_gamma                      113.85300
_symmetry_space_group_name_H-M         'P 1'
_symmetry_Int_Tables_number            1

loop_
_symmetry_equiv_pos_as_xyz
   'x, y, z'

loop_
   _atom_site_label
   _atom_site_occupancy
   _atom_site_fract_x
   _atom_site_fract_y
   _atom_site_fract_z
   _atom_site_adp_type
   _atom_site_B_iso_or_equiv
   _atom_site_type_symbol
   Na         1.0     0.276679      0.276679      0.276679     Biso  1.000000 Na
   Mg         1.0     0.772989      0.583116      0.583116     Biso  1.000000 Mg
   Mg         1.0     0.583116      0.772989      0.583116     Biso  1.000000 Mg
   Mg         1.0     0.583116      0.583116      0.772989     Biso  1.000000 Mg
   Al         1.0     0.931345      0.596192      0.371116     Biso  1.000000 Al
   Al         1.0     0.371116      0.931345      0.596192     Biso  1.000000 Al
   Al         1.0     0.596192      0.371116      0.931345     Biso  1.000000 Al
   Al         1.0     0.596192      0.931345      0.371116     Biso  1.000000 Al
   Al         1.0     0.931345      0.371116      0.596192     Biso  1.000000 Al
   Al         1.0     0.371116      0.596192      0.931345     Biso  1.000000 Al
   Si         1.0     0.208962      0.014526      0.825584     Biso  1.000000 Si
   Si         1.0     0.825584      0.208962      0.014526     Biso  1.000000 Si
   Si         1.0     0.014526      0.825584      0.208962     Biso  1.000000 Si
   Si         1.0     0.014526      0.208962      0.825584     Biso  1.000000 Si
   Si         1.0     0.208962      0.825584      0.014526     Biso  1.000000 Si
   Si         1.0     0.825584      0.014526      0.208962     Biso  1.000000 Si
   B          1.0     0.584257      0.584257      0.253747     Biso  1.000000 B
   B          1.0     0.253747      0.584257      0.584257     Biso  1.000000 B
   B          1.0     0.584257      0.253747      0.584257     Biso  1.000000 B
   O          1.0     0.793678      0.793678      0.793678     Biso  1.000000 O
   O          1.0     0.560225      0.560225      0.374296     Biso  1.000000 O
   O          1.0     0.374296      0.560225      0.560225     Biso  1.000000 O
   O          1.0     0.560225      0.374296      0.560225     Biso  1.000000 O
   O          1.0     0.802885      0.397710      0.397710     Biso  1.000000 O
   O          1.0     0.397710      0.802885      0.397710     Biso  1.000000 O
   O          1.0     0.397710      0.397710      0.802885     Biso  1.000000 O
   O          1.0     0.178109      0.178109      0.901118     Biso  1.000000 O
   O          1.0     0.901118      0.178109      0.178109     Biso  1.000000 O
   O          1.0     0.178109      0.901118      0.178109     Biso  1.000000 O
   O          1.0     0.292871      0.014262      0.014262     Biso  1.000000 O
   O          1.0     0.014262      0.292871      0.014262     Biso  1.000000 O
   O          1.0     0.014262      0.014262      0.292871     Biso  1.000000 O
   O          1.0     0.993954      0.785900      0.605560     Biso  1.000000 O
   O          1.0     0.605560      0.993954      0.785900     Biso  1.000000 O
   O          1.0     0.785900      0.605560      0.993954     Biso  1.000000 O
   O          1.0     0.785900      0.993954      0.605560     Biso  1.000000 O
   O          1.0     0.993954      0.605560      0.785900     Biso  1.000000 O
   O          1.0     0.605560      0.785900      0.993954     Biso  1.000000 O
   O          1.0     0.385756      0.101932      0.814736     Biso  1.000000 O
   O          1.0     0.814736      0.385756      0.101932     Biso  1.000000 O
   O          1.0     0.101932      0.814736      0.385756     Biso  1.000000 O
   O          1.0     0.101932      0.385756      0.814736     Biso  1.000000 O
   O          1.0     0.385756      0.814736      0.101932     Biso  1.000000 O
   O          1.0     0.814736      0.101932      0.385756     Biso  1.000000 O
   O          1.0     0.673329      0.523844      0.191464     Biso  1.000000 O
   O          1.0     0.191464      0.673329      0.523844     Biso  1.000000 O
   O          1.0     0.523844      0.191464      0.673329     Biso  1.000000 O
   O          1.0     0.523844      0.673329      0.191464     Biso  1.000000 O
   O          1.0     0.673329      0.191464      0.523844     Biso  1.000000 O
   O          1.0     0.191464      0.523844      0.673329     Biso  1.000000 O
   H          1.0     0.925411      0.925411      0.925411     Biso  1.000000 H
   H          1.0     0.668352      0.264647      0.264647     Biso  1.000000 H
   H          1.0     0.264647      0.668352      0.264647     Biso  1.000000 H
   H          1.0     0.264647      0.264647      0.668352     Biso  1.000000 H
